# Supplementary material for: 3′ UTR lengthening as a novel mechanism in regulating cellular senescence
Source: HighWire-hosted journal article supplement (doi:10.1101/gr.224451.117), 2018-02-12
Supplement: Revised_Supplemental_Figure_S7.docx [file Revised_Supplemental_Figure_S7.docx]

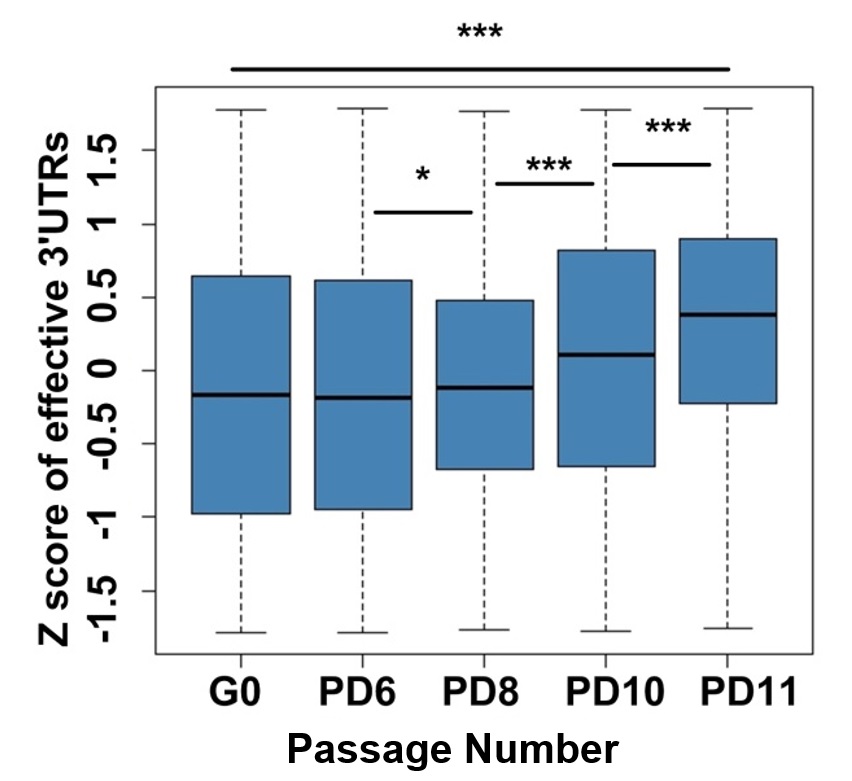


**Supplemental Figure 7. Box plot for Z-score transformed effective 3′ UTRs across G0, PD6, PD8, PD10, and PD11 of MEFs.** (***) P < 0.001 and (*) P < 0.05, two-tailed Wilcoxon signed rank test.
