# Supplementary material for: 3′ UTR lengthening as a novel mechanism in regulating cellular senescence
Source: Genome Res. 2018 Mar;28(3):285–94. doi: 10.1101/gr.224451.117 (PMC5848608; doi:10.1101/gr.224451.117)
Supplement: Supplemental Material [file supp_gr.224451.117_Supplemental_Table_S5.xlsx]

## Sheet: GO_BP
GO term (BP)	Num of DGs	PValue	Gene name
Cell cycle	41	5.08732e-10	E2F1, KIF23, CKS1B, CLSPN, PRC1, NEK2, CROCC, ANAPC15, CHEK1, ANLN, CEP55, KIF2C, CGREF1, CDCA8, CDCA2, BUB1, MASTL, DDIAS, CKAP2, TXNIP, CDC6, PARD6B, DAB2IP, NUF2, CENPE, CDC20, NDC80, BIRC5, HMGA2, MCM3, ECT2, MCM5, CCNB1, UHRF1, CCND1, CDKN1A, TIMELESS, RGCC, RASSF2, CHAF1A, DSCC1
Cell adhesion	33	2.19744e-08	NUAK1, IGFBP7, NPNT, ITGA11, POSTN, MEGF10, CD24A, SDC3, ALCAM, ISLR, VCAM1, CGREF1, THBS1, SPON2, BOC, DPT, COL18A1, FLRT3, SELP, SVEP1, LPP, NECTIN2, NID2, MCAM, ADGRG1, PCDH19, AMIGO1, LAMA2, HES1, ITGA8, CDON, LAMC2, AOC3
Positive regulation of cell migration	18	2.05948e-06	EGFR, COL18A1, SPHK1, IGF1, HGF, MCAM, CXCL12, SEMA4G, FOXF1, RRAS2, SEMA7A, SEMA3F, PDGFRA, CEMIP, SEMA4B, SEMA3B, LAMC2, THBS1
Cell division	25	2.18329e-06	KIF23, CDC6, CKS1B, PARD6B, PRC1, NEK2, ANAPC15, NUF2, CENPE, NDC80, BIRC5, ANLN, CDC20, CEP55, HMGA2, ECT2, MCM5, CCNB1, KIF2C, CCND1, CDCA8, TIMELESS, CDCA2, BUB1, MASTL
DNA replication	14	2.57866e-06	GINS1, CDC6, POLI, MCM10, MCM3, MCM5, RFC5, RPA2, RRM1, CHAF1A, ORC1, FEN1, REPIN1, DSCC1
Mitotic nuclear division	21	2.6634e-06	KIF23, CDC6, CENPN, NEK2, ANAPC15, NUF2, CDC20, CENPE, ANLN, NDC80, BIRC5, CEP55, HMGA2, CENPH, CCNB1, KIF2C, CDCA8, TIMELESS, BUB1, CDCA2, MASTL
Positive regulation of fibroblast proliferation	10	1.01322e-05	EGFR, CCNB1, E2F1, CDC6, CDKN1A, EREG, SPHK1, PDGFRA, IGF1, RNASEH2B
Multicellular organism development	45	1.16473e-05	FHL1, NPNT, HOXA11, CSPG4, HOXD10, HOXD11, ZIC2, GLI1, UNC5B, PAK3, SEMA7A, HEG1, SEMA3B, EGFR, COL18A1, FLRT3, NGEF, DAB2IP, FZD1, EDA2R, CENPE, PKDCC, AMBRA1, FZD5, FZD4, ADGRG1, SLIT3, AMIGO1, NOTCH3, DKK2, HOXC10, EYA4, ISL2, DACT1, EREG, SFRP1, TIMELESS, SEMA4G, ID2, SFRP2, ITGA8, PDGFRA, FOXC2, SORT1, SEMA4B
Response to mechanical stimulus	9	5.98929e-05	TXNIP, CCNB1, ACTA1, P2RX3, POSTN, BDKRB1, DCN, THBS1, CXCL12
Positive regulation of peptidyl-tyrosine phosphorylation	11	6.51564e-05	PDGFRA, CSPG4, IGF1, RIPK2, IGF2, HGF, MLST8, CD24A, ANGPT4, GHR, IL11

## Sheet: KEGG
KEGG pathway	Num of DGs	PValue	Gene name
Pathways in cancer	25	2.86668e-05	EGFR, E2F1, CKS1B, MMP9, ARNT2, FZD1, RUNX1T1, IGF1, BDKRB1, BIRC5, HGF, FZD5, CXCL12, FZD4, DAPK1, RAD51, GLI1, LAMA2, CCND1, CDKN1A, PLCB4, PDGFRA, PIK3R5, GNG2, LAMC2
Proteoglycans in cancer	17	3.04189e-05	EGFR, LUM, MMP9, FZD1, IGF1, IGF2, DCN, HGF, FZD5, FZD4, HOXD10, CDKN1A, CCND1, RRAS2, PIK3R5, THBS1, GPC1
Cell cycle	12	0.000196131	CCNB1, E2F1, CDC6, CDKN1A, CCND1, BUB1, TTK, CHEK1, CDC20, MCM3, ORC1, MCM5
Axon guidance	12	0.000277785	ABLIM1, NGEF, PLXNA4, UNC5B, SEMA4G, PAK3, SEMA7A, SEMA3F, SEMA4B, SEMA3B, CXCL12, SLIT3
Bladder cancer	7	0.000413836	EGFR, E2F1, CDKN1A, CCND1, MMP9, THBS1, DAPK1
Transcriptional misregulation in cancer	13	0.000674247	MAF, NFKBIZ, CCR7, CDKN1A, FUT8, ID2, MMP9, ARNT2, RUNX1T1, IGF1, HMGA2, ETV4, MYCN
DNA replication	6	0.00142176	RFC5, RPA2, MCM3, RNASEH2B, FEN1, MCM5
Focal adhesion	14	0.00150441	EGFR, VAV3, ITGA11, IGF1, HGF, LAMA2, CCND1, PAK3, ITGB8, ITGA8, PDGFRA, PIK3R5, LAMC2, THBS1
Melanoma	8	0.00157131	EGFR, E2F1, CDKN1A, CCND1, PDGFRA, IGF1, PIK3R5, HGF
Hypertrophic cardiomyopathy (HCM)	8	0.00291257	TNNT2, ITGB8, ITGA8, ITGA11, IGF1, SGCD, CACNA1C, TPM1
