# Supplementary material for: 3′ UTR lengthening as a novel mechanism in regulating cellular senescence
Source: Genome Res. 2018 Mar;28(3):285–94. doi: 10.1101/gr.224451.117 (PMC5848608; doi:10.1101/gr.224451.117)
Supplement: Supplemental Material [file supp_gr.224451.117_Supplemental_Table_S6.xlsx]

## Sheet: 18639_refined_PA_clusters
chrom	chromStart	chromEnd	#raw_peak_tags	raw_peak_length	mode_location	#mode_tags	#new_peak_tags	#new_peak_tags/raw_peak_tags	new_peak_start	new_peak_end	new_peak_length	downstream_20bases_of_mode	Entrez_ID	Refseq_ID	strand	Detailed_gene_location	Detailed_gene_location_start	Detailed_gene_location_end	#GO_tags	#PD6_tags	#PD8_tags	#PD10_tags	#PD11_tags	G0_percentofused	PD6_percentofused	PD8_percentofused	PD10_percentofused	PD11_percentofused
1	9950232	9950258	33	26	9950245	24	33	1	9950244	9950250	7	ATCTGTGTCTGTTAACTCTG	1_-_100039596	NM_001285425	-	'PA'	9950234	9950254	14	8	3	2	6	1	1	1	1	1
1	175787330	175787387	186	57	175787352	129	179	0.962366	175787344	175787354	11	ACATCATTATATAGTGCTGT	1_-_100040462	NM_001170853	-	'PA'	175787341	175787361	7	9	46	28	89	1	1	1	1	1
1	129650256	129650284	27	28	129650269	11	26	0.962963	129650267	129650276	10	AAGTTCCTTCTTGATCTATA	1_-_100502745	NR_045298	-	'exon'	129650194	129650530	3	5	4	6	8	1	1	1	1	1
1	152007128	152007173	471	45	152007157	214	453	0.961783	152007155	152007158	4	TTCTTTGCCTCAGTTTCACT	1_-_102639566	NR_110420	-	'exon'	152006173	152007782	90	53	85	86	139	0.692308	0.779412	0.787037	0.819048	0.780899
1	152006131	152006177	94	46	152006146	61	90	0.957447	152006145	152006156	12	AACCTGTTATCATATGGCTT	1_-_102639566	NR_110420	-	'extend_3'TUR'	152001173	152006172	29	11	14	13	23	0.223077	0.161765	0.12963	0.12381	0.129213
1	163936240	163936287	174	47	163936272	59	169	0.971264	163936255	163936276	22	AGTCTGGATTGTCAGGGAAC	1_-_103967	NM_172646	-	'intron'	163922223	163940998	48	10	36	32	43	0.827586	0.909091	0.837209	0.780488	0.741379
1	163917404	163917448	42	44	163917435	21	42	1	163917412	163917439	28	AACCCCCAATTCCTCATTCT	1_-_103967	NM_001038619	-	'PA'	163917423	163917443	10	1	7	9	15	0.172414	0.0909091	0.162791	0.219512	0.258621
1	157625266	157625315	4218	49	157625293	1733	4031	0.955666	157625286	157625294	9	ACGCAGAACGTGTTTGACTT	1_-_104009	NM_001024945	-	'PA'	157625275	157625295	1549	282	582	324	1294	1	1	1	1	1
1	172072051	172072186	1190	135	172072134	613	1165	0.978992	172072129	172072172	44	ACTGCCTTGTTTCTACCTTA	1_-_107652	NM_133806	-	'PA'	172072124	172072144	302	151	251	167	294	1	1	1	1	1
1	191465463	191465496	44	33	191465484	28	43	0.977273	191465473	191465484	12	AAGTTAGTAGTAGATGATCT	1_-_108000	NM_001081363	-	'3'UTR'	191464493	191466477	5	13	13	9	3	0.125	0.254902	0.19697	0.310345	0.0731707
1	191465739	191465769	61	30	191465753	29	60	0.983607	191465751	191465758	8	ATACATGTCTTTGAATGTGT	1_-_108000	NM_001081363	-	'3'UTR'	191464493	191466477	9	15	17	7	12	0.225	0.294118	0.257576	0.241379	0.292683
1	191465799	191465825	27	26	191465813	15	26	0.962963	191465810	191465815	6	ACCACTATGTCTTCTTAACT	1_-_108000	NM_001081363	-	'3'UTR'	191464493	191466477	6	15	3	0	2	0.15	0.294118	0.0454545	0	0.0487805
1	191465848	191465876	58	28	191465863	49	58	1	191465860	191465864	5	AAACTTTTTTGTAAAAGTTA	1_-_108000	NM_001081363	-	'3'UTR'	191464493	191466477	6	8	23	11	10	0.15	0.156863	0.348485	0.37931	0.243902
1	191464395	191464452	42	57	191464434	14	40	0.952381	191464404	191464437	34	GGTGTACATATGATTTAACC	1_-_108000	NM_001081363	-	'extend_3'TUR'	191459493	191464492	14	0	10	2	14	0.35	0	0.151515	0.0689655	0.341463
1	167104600	167104631	31	31	167104618	8	31	1	167104606	167104621	16	TTTTCTGTCTTGAGGATCTG	1_-_108735	NM_145512	-	'3'UTR'	167104472	167109386	5	2	14	4	6	0.0252525	0.0540541	0.126126	0.0634921	0.0289855
1	167105825	167105860	60	35	167105846	26	57	0.95	167105843	167105849	7	ATAAAGATGCCTGCTAGACT	1_-_108735	NM_145512	-	'3'UTR'	167104472	167109386	16	8	19	4	10	0.0808081	0.216216	0.171171	0.0634921	0.0483092
1	167108803	167108834	68	31	167108818	36	66	0.970588	167108817	167108824	8	GATTCTTTCTCTTGCCCTTA	1_-_108735	NM_145512	-	'3'UTR'	167104472	167109386	19	8	11	9	19	0.0959596	0.216216	0.0990991	0.142857	0.0917874
1	167104454	167104490	480	36	167104474	314	462	0.9625	167104469	167104476	8	AACAAATGTAGTGTTGTCTC	1_-_108735	NM_145512	-	'PA'	167104462	167104482	158	19	67	46	172	0.79798	0.513514	0.603604	0.730159	0.830918
1	51527125	51527158	238	33	51527143	132	230	0.966387	51527140	51527144	5	ACACAAGGCTAATCTGATTA	1_-_109019	NM_028696	-	'3'UTR'	51526332	51528088	34	45	58	41	52	0.0939227	0.110294	0.141463	0.0983213	0.0876897
1	51521795	51521832	170	37	51521815	104	163	0.958824	51521808	51521820	13	AAAGTTTTAGATGTCTTCCT	1_-_109019	NM_028696	-	'extend_3'TUR'	51521332	51526331	26	23	26	32	56	0.0718232	0.0563725	0.0634146	0.0767386	0.0944351
1	51522685	51522720	350	35	51522704	217	346	0.988571	51522700	51522706	7	AAATAAGATGAATACTGTCA	1_-_109019	NM_028696	-	'extend_3'TUR'	51521332	51526331	42	37	58	85	124	0.116022	0.0906863	0.141463	0.203837	0.209106
1	51522836	51522884	167	48	51522851	58	165	0.988024	51522851	51522874	24	ATTTGAGTCCTGTATCTGTT	1_-_109019	NM_028696	-	'extend_3'TUR'	51521332	51526331	19	28	25	42	51	0.0524862	0.0686275	0.0609756	0.100719	0.0860034
1	51526308	51526364	1151	56	51526334	773	1101	0.95656	51526330	51526348	19	AAGATATAGGAGTAACAGAA	1_-_109019	NM_028696	-	'PA'	51526322	51526342	201	230	215	186	269	0.555249	0.563725	0.52439	0.446043	0.453626
1	36595860	36595886	21	26	36595875	14	20	0.952381	36595871	36595877	7	AATGAGCTGGGGGCAGGTTT	1_-_109346	NM_026241	-	'3'UTR'	36595018	36596235	7	1	8	1	3	0.2	0.166667	0.296296	0.0833333	0.107143
1	36595968	36595998	71	30	36595985	48	68	0.957746	36595980	36595987	8	ATCACATGGGCAAAGATAAA	1_-_109346	NM_026241	-	'3'UTR'	36595018	36596235	21	4	13	10	20	0.6	0.666667	0.481481	0.833333	0.714286
1	36595004	36595028	20	24	36595018	14	20	1	36595014	36595018	5	AATGACTTGCCTTAAGTAGC	1_-_109346	NM_026241	-	'PA'	36595008	36595028	7	1	6	1	5	0.2	0.166667	0.222222	0.0833333	0.178571
1	95304320	95304369	12325	49	95304343	6761	11866	0.962759	95304342	95304352	11	AAAACGTTTGCCCTCTTCCT	1_-_110611	NM_133808	-	'3'UTR'	95302517	95304749	4643	942	2339	1249	3298	0.79449	0.674302	0.755979	0.755139	0.748865
1	95302494	95302540	3212	46	95302518	1698	3055	0.951121	95302514	95302520	7	ATGCAGTGTGATGGGACTCA	1_-_110611	NM_133808	-	'PA'	95302507	95302527	715	398	632	345	965	0.122348	0.284896	0.204266	0.208585	0.219119
1	72305728	72305763	165	35	72305749	124	158	0.957576	72305746	72305751	6	AAACCGGTTATCTTTTAAGG	1_-_111175	NM_023523	-	'PA'	72305737	72305757	35	23	39	19	42	1	1	1	1	1
1	66877406	66877449	1136	43	66877427	710	1083	0.953345	66877424	66877433	10	ATGTGTAGACCGTGTGAGGC	1_-_11363	NM_007381	-	'3'UTR'	66877413	66878007	248	136	263	154	282	0.258873	0.410876	0.415482	0.446377	0.363402
1	66877729	66877764	285	35	66877747	228	276	0.968421	66877743	66877748	6	AAGAGCCTTTTAATGTCTTA	1_-_11363	NM_007381	-	'3'UTR'	66877413	66878007	84	29	61	26	76	0.0876827	0.0876133	0.0963665	0.0753623	0.0979381
1	66877825	66877893	1770	68	66877853	1299	1684	0.951412	66877850	66877860	11	AACACAGGGAGAGAGAAATT	1_-_11363	NM_007381	-	'3'UTR'	66877413	66878007	626	166	309	165	418	0.653445	0.501511	0.488152	0.478261	0.53866
1	179693644	179693702	512	58	179693663	284	488	0.953125	179693659	179693666	8	ATTTGATGGATATTTTTCTT	1_-_11566	NM_007422	-	'3'UTR'	179693309	179694375	118	92	114	47	117	0.151866	0.188139	0.189684	0.153595	0.207815
1	179694252	179694293	576	41	179694277	296	551	0.956597	179694269	179694277	9	AGTTTTCAGCTGGCGTTGGT	1_-_11566	NM_007422	-	'3'UTR'	179693309	179694375	176	93	107	58	117	0.226512	0.190184	0.178037	0.189542	0.207815
1	179693288	179693331	1736	43	179693308	1166	1677	0.966014	179693305	179693311	7	ATGCTTTGTGTGTTGTTTTT	1_-_11566	NM_007422	-	'PA'	179693299	179693319	471	304	377	197	328	0.606178	0.621677	0.627288	0.643791	0.582593
1	135806867	135806911	1198	44	135806893	390	1139	0.950751	135806881	135806893	13	ACCCAGCACAAAGCTGACTG	1_-_116847	NM_054077	-	'3'UTR'	135806882	135809182	193	64	194	64	624	0.861607	0.864865	0.839827	0.761905	0.854795
1	135806158	135806207	117	49	135806180	54	113	0.965812	135806169	135806180	12	AAAGTCAGTCCAGAAATCTA	1_-_116847	NM_054077	-	'extend_3'TUR'	135801882	135806881	9	5	20	16	63	0.0401786	0.0675676	0.0865801	0.190476	0.0863014
1	163171121	163171168	6085	47	163171144	4270	5901	0.969762	163171143	163171146	4	AAAACCGTTGTCATGTTTTA	1_-_11758	NM_007453	-	'3'UTR'	163170243	163171851	1862	1079	1191	554	1215	0.925447	0.899167	0.872527	0.875197	0.912162
1	163171664	163171700	643	36	163171683	554	617	0.959565	163171682	163171684	3	AAAACCTTCTCGGGATTCTT	1_-_11758	NM_007453	-	'3'UTR'	163170243	163171851	144	113	168	76	116	0.0715706	0.0941667	0.123077	0.120063	0.0870871
1	192994161	192994199	81	38	192994178	44	78	0.962963	192994173	192994188	16	AAACGTTAGTGTGGCACTGG	1_-_11910	NM_007498	-	'PA'	192994166	192994186	11	6	37	5	19	1	1	1	1	1
1	166367215	166367262	1809	47	166367244	934	1728	0.955224	166367240	166367244	5	ATTCCTCACGTGTGTGACTC	1_-_11931	NM_009721	-	'3'UTR'	166367230	166368406	442	345	309	192	440	0.940426	0.927419	0.927928	0.893023	0.942184
1	71074095	71074133	51	38	71074110	26	49	0.960784	71074104	71074122	19	ATGTGTATCTTCTGTAAAAA	1_-_12021	NM_007525	-	'PA'	71074099	71074119	4	22	11	6	6	1	1	1	1	1
1	135971881	135971926	2665	45	135971907	1136	2545	0.954972	135971899	135971909	11	TAATGTGTAGAGAAGGTGGA	1_-_12227	NM_007570	-	'3'UTR'	135971442	135973945	750	142	423	303	927	0.955414	0.922078	0.872165	0.935185	0.959627
1	135973436	135973475	174	39	135973453	127	169	0.971264	135973449	135973462	14	AATCTTCTCTTTTGTTTTTC	1_-_12227	NM_007570	-	'3'UTR'	135971442	135973945	35	12	62	21	39	0.044586	0.0779221	0.127835	0.0648148	0.0403727
1	162133031	162133075	3259	44	162133056	2448	3152	0.967168	162133048	162133057	10	AAAAGATGAGTTCTGCAATC	1_-_12301	NM_009786	-	'3'UTR'	162132498	162133697	858	576	656	334	728	0.75	0.699029	0.724062	0.737307	0.752844
1	162133259	162133315	998	56	162133298	457	950	0.951904	162133287	162133300	14	AAAATTCAAATTTGTGCAAA	1_-_12301	NM_009786	-	'3'UTR'	162132498	162133697	249	191	205	99	206	0.217657	0.231796	0.226269	0.218543	0.21303
1	184397365	184397411	12243	46	184397391	6423	12060	0.985053	184397385	184397391	7	AGTCGCACCATGCCTTGTTT	1_-_12334	NM_009794	-	'PA'	184397380	184397400	4003	2068	3106	1359	2727	0.995276	0.996627	0.998714	0.994876	0.998535
1	141982421	141982451	24	30	141982439	14	23	0.958333	141982432	141982442	11	AAACTTCTTGCCTATGTACG	1_-_12628	NM_009888	-	'PA'	141982422	141982442	11	0	1	0	11	1	0	1	0	1
1	58468821	58468874	862	53	58468845	687	819	0.950116	58468841	58468846	6	ATAAAGGTCTATAGCTTGGT	1_-_12747	NM_001042634	-	'3'UTR'	58468832	58469040	182	111	214	102	210	0.730924	0.720779	0.775362	0.755556	0.734266
1	58468883	58468923	290	40	58468908	192	281	0.968966	58468901	58468909	9	AAATAACATCTTTCAGTAAT	1_-_12747	NM_001042634	-	'3'UTR'	58468832	58469040	67	43	62	33	76	0.269076	0.279221	0.224638	0.244444	0.265734
1	45432600	45432707	30727	107	45432653	7030	29307	0.953787	45432631	45432660	30	AAATATGTTTTCATCAATTC	1_-_12832	NM_007737	-	'3'UTR'	45431176	45432928	8748	2939	7724	3882	9321	0.80279	0.816162	0.873262	0.866324	0.862576
1	92663414	92663463	11797	49	92663436	7583	11527	0.977113	92663434	92663441	8	AGTTTTGGTGGTCTTGGTTC	1_-_12835	NM_001243009	-	'PA'	92663425	92663445	2583	2001	2980	1890	4084	0.996143	0.9995	0.999665	0.998415	0.997801
1	196929966	196930007	1508	41	196929990	813	1491	0.988727	196929983	196929990	8	AAGATCTAGGTGTGTGGTTC	1_-_12946	NM_013499	-	'PA'	196929972	196929992	398	188	347	164	394	1	1	1	1	1
1	132336762	132336809	388	47	132336779	118	375	0.966495	132336778	132336790	13	ATGCTGTCATTGTCTTCAAG	1_-_13136	NM_010016	-	'3'UTR'	132335607	132336888	86	28	57	43	161	0.2134	0.25	0.230769	0.154676	0.166667
1	132343224	132343263	561	39	132343243	330	538	0.959002	132343242	132343249	8	AAAAACATCTCCTGATTGAT	1_-_13136	NM_010016	-	'intron'	132336957	132344195	113	22	73	75	255	0.280397	0.196429	0.295547	0.269784	0.263975
1	132335572	132335631	1048	59	132335609	492	1009	0.962786	132335588	132335613	26	AAATACACTGTTGTCTCCTG	1_-_13136	NM_010016	-	'PA'	132335597	132335617	183	60	113	140	513	0.454094	0.535714	0.45749	0.503597	0.531056
1	122009839	122009898	18596	59	122009867	6989	17873	0.961121	122009866	122009874	9	TGCCTGGGTTACTCTGTTGT	1_-_13167	NM_007830	-	'PA'	122009847	122009867	6308	2136	6768	2814	5304	1	1	1	1	1
1	155302870	155302915	5181	45	155302894	3677	4972	0.95966	155302890	155302896	7	AAAATTGATTGTGTCATTGA	1_-_13211	NM_007842	-	'PA'	155302878	155302898	1605	785	1113	510	959	0.985872	0.986181	0.988455	0.990291	0.993782
1	184206071	184206120	9848	49	184206101	4272	9375	0.95197	184206095	184206101	7	AAGCTAGCCTTAGTGGAATT	1_-_13244	NM_007853	-	'3'UTR'	184205901	184206877	2701	1290	2083	994	2307	0.892008	0.854305	0.871548	0.858377	0.893148
1	184206501	184206583	1360	82	184206526	942	1294	0.951471	184206522	184206540	19	ATATATTAATAATATTCATT	1_-_13244	NM_007853	-	'3'UTR'	184205901	184206877	327	220	307	164	276	0.107992	0.145695	0.128452	0.141623	0.106852
1	75305121	75305159	1878	38	75305141	1352	1808	0.962726	75305140	75305142	3	AGCTCTCTGTGCTTTTTCTG	1_-_13437	NM_001110831	-	'PA'	75305130	75305150	512	199	469	175	453	1	1	1	1	1
1	183832654	183832710	406	56	183832694	273	395	0.972906	183832684	183832698	15	AATTAACTTTAAATGTAGCA	1_-_13800	NM_001083121	-	'3'UTR'	183826516	183835990	54	67	107	79	88	0.0819423	0.147253	0.124419	0.151341	0.107317
1	183833050	183833107	1735	57	183833090	960	1709	0.985014	183833068	183833091	24	ATGTTTCTTGTTTGTGACAC	1_-_13800	NM_001083121	-	'3'UTR'	183826516	183835990	382	197	457	245	428	0.579666	0.432967	0.531395	0.469349	0.521951
1	183835589	183835668	603	79	183835640	241	573	0.950249	183835623	183835645	23	AGATTTTTTTCCAGAGGGCG	1_-_13800	NM_001083121	-	'3'UTR'	183826516	183835990	107	82	143	98	143	0.162367	0.18022	0.166279	0.187739	0.17439
1	182919664	182919711	6809	47	182919689	5077	6513	0.956528	182919685	182919690	6	AAGAGTGTGTGGGCCAGATA	1_-_13849	NM_010145	-	'PA'	182919677	182919697	2221	431	973	706	2182	1	1	1	1	1
1	137005058	137005093	200	35	137005075	148	190	0.95	137005071	137005076	6	ATGGTTGTGTCTGCTTCTGC	1_-_13924	NM_007955	-	'PA'	137005065	137005085	151	2	4	4	29	1	1	1	1	1
1	14197994	14198019	26	25	14198008	18	25	0.961538	14198005	14198009	5	ACTTGATTTTTTTCCCTCTT	1_-_14048	NM_001252192	-	'intron'	14174766	14198975	5	10	3	0	7	0.208333	0.5	0.1875	0	0.269231
1	14159018	14159052	74	34	14159035	31	72	0.972973	14159035	14159043	9	ATGCTCCTTGGATGTCAGTA	1_-_14048	NM_001252192	-	'PA'	14159029	14159049	19	10	13	11	19	0.791667	0.5	0.8125	1	0.730769
1	177531480	177531546	4618	66	177531511	3006	4392	0.951061	177531507	177531517	11	AAGACCTTTTTAAAATTTAA	1_-_14194	NM_010209	-	'PA'	177531499	177531519	1249	711	964	455	1013	1	1	1	1	1
1	43179883	43179955	10858	72	43179919	4900	10506	0.967582	43179916	43179936	21	ACAGTGTGTGGACTAATGAT	1_-_14200	NM_001289533	-	'PA'	43179906	43179926	2106	1314	3114	1225	2747	1	1	1	1	1
1	71632071	71632126	24669	55	71632094	7594	23592	0.956342	71632094	71632098	5	ATGTGGACGTCATTTCTTTT	1_-_14268	NM_001276413	-	'3'UTR'	71632047	71632785	15826	4354	13783	8074	22410	0.996035	0.996795	0.995522	0.994825	0.994674
1	133183047	133183087	445	40	133183070	253	423	0.950562	133183066	133183073	8	TGCCGCTGTACGTCACCTCC	1_-_14270	NM_001081011	-	'3'UTR'	133181828	133185933	157	50	60	34	122	0.50974	0.60241	0.465116	0.586207	0.516949
1	133191778	133191815	367	37	133191796	255	352	0.959128	133191795	133191803	9	ATGAGGTTGCCAGATCTCTT	1_-_14270	NM_001081011	-	'intron'	133189423	133192896	137	29	63	19	104	0.444805	0.349398	0.488372	0.327586	0.440678
1	64777116	64777156	423	40	64777134	211	404	0.955083	64777132	64777144	13	AATGGAGGCGTTGAGTCTTT	1_-_14367	NM_001042659	-	'PA'	64777122	64777142	100	67	69	57	111	0.909091	0.971014	0.92	0.904762	0.956897
1	195098341	195098367	50	26	195098355	42	50	1	195098354	195098356	3	ATCTCATTATTTAATTCTTG	1_-_14373	NM_008059	-	'PA'	195098344	195098364	9	1	13	6	21	1	1	1	1	1
1	120730695	120730724	77	29	120730711	61	77	1	120730706	120730713	8	AATTTATCTTGTTGATCTGC	1_-_14633	NM_001081125	-	'3'UTR'	120730638	120732361	19	15	13	5	25	1	1	1	1	1
1	52242419	52242454	357	35	52242438	314	340	0.952381	52242436	52242439	4	ACCCAGTATTGTTGGGTTTA	1_-_14660	NM_001113383	-	'3'UTR'	52242125	52244491	65	47	77	58	93	0.0932568	0.051087	0.109843	0.096828	0.147854
1	52220275	52220316	1247	41	52220296	847	1199	0.961508	52220293	52220301	9	AAACTATGAGAAAAAGTGTT	1_-_14660	NM_001081081	-	'PA'	52220284	52220304	493	155	169	92	290	0.707317	0.168478	0.241084	0.153589	0.461049
1	52242105	52242145	1805	40	52242125	1321	1719	0.952355	52242125	52242127	3	ATTTTATTGTTTTTTTTAAT	1_-_14660	NM_001113383	-	'PA'	52242115	52242135	62	678	381	415	183	0.0889527	0.736957	0.543509	0.692821	0.290938
1	67049932	67049970	603	38	67049951	520	573	0.950249	67049944	67049952	9	AAGTGGTCGAGTTTTTATTT	1_-_14768	NM_001190985	-	'3'UTR'	67047091	67050054	177	46	74	38	238	1	1	1	1	1
1	84719306	84719348	304	42	84719333	260	294	0.967105	84719329	84719333	5	ACACCTGTGGTGCTGACAGA	1_-_14897	NM_133975	-	'3'UTR'	84717764	84721192	83	37	54	30	90	0.0634557	0.0756646	0.0576923	0.0669643	0.084666
1	84720842	84720899	2617	57	84720881	2144	2490	0.951471	84720878	84720883	6	AATTCTGGGCTGTGTGTATC	1_-_14897	NM_133975	-	'3'UTR'	84717764	84721192	834	313	529	232	582	0.637615	0.640082	0.565171	0.517857	0.547507
1	84717751	84717788	907	37	84717771	441	888	0.979052	84717768	84717774	7	GTGGTTAGTTTTGTTACTTT	1_-_14897	NM_133975	-	'PA'	84717754	84717774	217	73	229	108	261	0.165902	0.149284	0.244658	0.241071	0.245532
1	156974390	156974427	146	37	156974410	40	144	0.986301	156974404	156974412	9	AGGTTTCTTGCTGCTCTCCT	1_-_15064	NM_008209	-	'extend_3'TUR'	156970008	156975007	22	12	29	18	63	0.423077	0.6	0.47541	0.461538	0.538462
1	156974988	156975022	148	34	156975003	74	145	0.97973	156975003	156975009	7	AGACCTGTCATTTAATTAAT	1_-_15064	NM_008209	-	'PA'	156974998	156975018	30	8	32	21	54	0.576923	0.4	0.52459	0.538462	0.461538
1	182732832	182732872	2915	40	182732854	2074	2875	0.986278	182732850	182732855	6	AACTAAATGGTGTTTGTAGC	1_-_15078	NM_008210	-	'3'UTR'	182732699	182733207	766	319	719	338	733	0.106448	0.0888332	0.122113	0.110241	0.100438
1	182732883	182732926	1787	43	182732906	764	1704	0.953553	182732902	182732911	10	ACAATGCCAGCATTTGGATT	1_-_15078	NM_008210	-	'3'UTR'	182732699	182733207	479	194	391	182	458	0.0665648	0.0540239	0.0664062	0.0593607	0.0627569
1	182732653	182732721	17105	68	182732699	7526	16471	0.962935	182732696	182732700	5	ATACCTGCTTCTGGTCTTTA	1_-_15078	NM_008210	-	'PA'	182732689	182732709	5951	3078	4778	2546	6107	0.826987	0.857143	0.811481	0.830398	0.836805
1	181459052	181459084	74	32	181459069	35	72	0.972973	181459066	181459075	10	ATCAAATCTACTTTGTTTTA	1_-_15278	NM_008249	-	'3'UTR'	181458187	181459307	13	5	20	3	31	0.0610329	0.0446429	0.106952	0.0283019	0.124
1	181458165	181458205	832	40	181458187	639	796	0.956731	181458184	181458187	4	AGTTTGTGTGTATATGTGTG	1_-_15278	NM_008249	-	'PA'	181458177	181458197	200	107	167	103	219	0.938967	0.955357	0.893048	0.971698	0.876
1	186551007	186551039	92	32	186551026	63	89	0.967391	186551018	186551027	10	AAAAGGCCGTTTGGCGCTCT	1_-_15284	NM_008250	-	'PA'	186551014	186551034	24	8	26	11	20	1	1	1	1	1
1	178764737	178764770	169	33	178764755	84	163	0.964497	178764752	178764757	6	AGGTGTACTGGCTGGTTTTG	1_-_15365	NR_037996	-	'PA'	178764745	178764765	30	18	54	35	26	1	1	1	1	1
1	195047871	195047900	53	29	195047887	35	51	0.962264	195047881	195047888	8	AAAACTAGTAACTATGAATG	1_-_15483	NM_008288	-	'3'UTR'	195047835	195048204	14	6	4	7	20	1	1	1	1	1
1	171879848	171879891	460	43	171879869	207	441	0.958696	171879868	171879877	10	ATTTATTTATCTAACACTTG	1_-_15490	NM_010476	-	'3'UTR'	171879668	171883163	146	31	133	54	77	0.154497	0.150485	0.161408	0.117904	0.136767
1	171879645	171879690	2575	45	171879672	1582	2461	0.955728	171879666	171879673	8	ATCTTGGTTTTAGACTCAGT	1_-_15490	NM_010476	-	'PA'	171879658	171879678	760	171	672	384	474	0.804233	0.830097	0.815534	0.838428	0.841918
1	90101289	90101321	209	32	90101307	134	201	0.961722	90101304	90101308	5	AGACCACTGTTATGTTCTAG	1_-_15504	NM_008299	-	'PA'	90101297	90101317	61	23	28	15	74	1	1	1	1	1
1	55134840	55134912	2709	72	55134893	1403	2601	0.960133	55134873	55134895	23	ATGCTGGGTGCAAGAGCCAT	1_-_15510	NM_010477	-	'3'UTR'	55134678	55135131	542	527	736	296	500	0.260702	0.302179	0.304888	0.273315	0.285225
1	55134657	55134701	6694	44	55134679	5400	6370	0.951598	55134678	55134681	4	TCTGGTTGTGTTACCCTTTC	1_-_15510	NM_010477	-	'PA'	55134668	55134688	1503	1204	1653	774	1236	0.722944	0.690367	0.684756	0.714681	0.705077
1	65205166	65205261	3444	95	65205203	1508	3274	0.950639	65205190	65205208	19	ACTCTTCTTTGAAGTGTTTA	1_-_15926	NM_001111320	-	'3'UTR'	65205190	65206038	1025	224	870	408	747	0.96607	0.99115	0.975336	0.987893	0.977749
1	156944633	156944679	5580	46	156944658	3915	5389	0.965771	156944652	156944658	7	AACTCCACTGCCTGTTTGTA	1_-_15939	NM_010500	-	'3'UTR'	156943497	156945633	920	1154	1518	670	1127	0.936864	0.955298	0.952919	0.964029	0.951858
1	175677408	175677443	368	35	175677427	293	350	0.951087	175677425	175677428	4	AAAGCAGTGTGCCTTTGGGA	1_-_15951	NM_008329	-	'PA'	175677415	175677435	19	18	86	55	172	1	1	1	1	1
1	72904489	72904531	1382	42	72904508	527	1358	0.982634	72904506	72904512	7	AGCTTGCATCGCCTTCCTCC	1_-_16011	NM_010518	-	'extend_3'TUR'	72899639	72904638	651	396	69	75	167	0.532733	0.607362	0.638889	0.531915	0.543974
1	72904551	72904671	1067	120	72904639	430	1016	0.952202	72904610	72904655	46	GAAGATCTCACATTTTATTA	1_-_16011	NM_010518	-	'PA'	72904629	72904649	535	244	38	64	135	0.437807	0.374233	0.351852	0.453901	0.439739
1	121312022	121312060	874	38	121312041	365	851	0.973684	121312039	121312046	8	CTTCCTGCCTTGTGTGATGT	1_-_16324	NM_008381	-	'PA'	121312032	121312052	163	96	201	125	266	1	1	1	1	1
1	52842245	52842284	73	39	52842271	47	70	0.958904	52842263	52842273	11	AAGATTATGGGTATAAAATA	1_-_16329	NM_008384	-	'extend_3'TUR'	52841264	52846263	17	8	18	3	24	0.160377	0.333333	0.333333	0.272727	0.369231
1	52845747	52845782	23	35	52845758	6	22	0.956522	52845758	52845776	19	AAAGAAAAGGAAGGAAGGAA	1_-_16329	NM_008384	-	'extend_3'TUR'	52841264	52846263	15	0	4	1	2	0.141509	0	0.0740741	0.0909091	0.0307692
1	52846246	52846281	169	35	52846266	136	168	0.994083	52846258	52846269	12	AAAACTGTACAGTTCAAGTG	1_-_16329	NM_008384	-	'PA'	52846254	52846274	74	16	32	7	39	0.698113	0.666667	0.592593	0.636364	0.6
1	82229651	82229702	2660	51	82229682	2076	2533	0.952256	82229678	82229687	10	AACCCACAGATGTGCATAGC	1_-_16367	NM_010570	-	'PA'	82229670	82229690	947	304	394	224	664	0.915861	0.849162	0.805726	0.871595	0.909589
1	191031787	191031829	340	42	191031810	243	332	0.976471	191031807	191031816	10	AGCTCTTTCTGTGTCTCCTG	1_-_16526	NM_001281848	-	'PA'	191031799	191031819	75	37	48	32	140	1	1	1	1	1
1	94914842	94914872	106	30	94914858	94	102	0.962264	94914856	94914858	3	AGAGGTTGTGCGTGTTGTGG	1_-_16560	NM_008440	-	'3'UTR'	94912033	94915033	26	4	43	10	19	0.0992366	0.0714286	0.186147	0.119048	0.0931373
1	94965119	94965146	38	27	94965132	20	38	1	94965132	94965135	4	AAAAAGAAGAAGACAGATTT	1_-_16560	NM_008440	-	'exon'	94965062	94965137	30	3	4	1	0	0.114504	0.0535714	0.017316	0.0119048	0
1	94912017	94912057	724	40	94912038	247	697	0.962707	94912033	94912043	11	ACATCCATTATGTCTCTGTC	1_-_16560	NM_008440	-	'PA'	94912023	94912043	206	49	184	73	185	0.78626	0.875	0.796537	0.869048	0.906863
1	172129368	172129409	21	41	172129402	5	21	1	172129378	172129402	25	AAAGCTGATGCTTGATCTTG	1_-_16589	NM_010633	-	'3'UTR'	172129387	172129997	7	0	3	4	7	0.411765	0	0.333333	0.5	0.538462
1	172128367	172128394	28	27	172128381	23	27	0.964286	172128377	172128384	8	AATTATTTTACCCTGTTTAG	1_-_16589	NM_010633	-	'extend_3'TUR'	172124387	172129386	10	1	6	4	6	0.588235	1	0.666667	0.5	0.461538
1	38234152	38234189	598	37	38234173	251	570	0.953177	38234170	38234173	4	ACCTTGTGTGCAGCACTGCG	1_-_16764	NM_001290814	-	'3'UTR'	38232836	38236293	164	91	149	45	121	1	1	1	1	1
1	154969871	154969903	159	32	154969886	61	155	0.974843	154969885	154969890	6	GCTGAGTTTCTGATTTTATT	1_-_16782	NM_008485	-	'PA'	154969876	154969896	34	19	34	18	50	1	1	1	1	1
1	140723877	140723926	50	49	140723906	16	48	0.96	140723888	140723918	31	ACTTGTATTTATTCTCAGAA	1_-_16876	NM_001025565	-	'3'UTR'	140721763	140725230	17	17	2	4	8	0.10241	0.146552	0.0384615	0.129032	0.117647
1	140724557	140724596	312	39	140724581	218	301	0.964744	140724575	140724582	8	AAACATAGTTAACTTTATGT	1_-_16876	NM_001025565	-	'3'UTR'	140721763	140725230	118	83	39	21	40	0.710843	0.715517	0.75	0.677419	0.588235
1	140721749	140721781	88	32	140721764	37	84	0.954545	140721763	140721771	9	ATACTCTGGCCTCTGTTATT	1_-_16876	NM_001025565	-	'PA'	140721753	140721773	31	16	11	6	20	0.186747	0.137931	0.211538	0.193548	0.294118
1	121964071	121964122	739	51	121964102	430	732	0.990528	121964088	121964107	20	AAGGAGAGTATCCTAAAATG	1_-_170706	NM_019432	-	'3'UTR'	121963954	121964286	225	101	160	80	166	1	1	1	1	1
1	20986998	20987053	849	55	20987025	428	807	0.95053	20987016	20987033	18	AAAAACAAAAGCATCCTCAG	1_-_170829	NM_177409	-	'extend_3'TUR'	20986478	20991477	273	54	208	68	204	0.97153	0.947368	0.920354	0.906667	0.980769
1	132951574	132951619	333	45	132951600	169	329	0.987988	132951587	132951606	20	ACACAAGTTGCCCAATGCTG	1_-_17164	NM_008551	-	'3'UTR'	132950281	132951668	97	56	64	48	64	0.100207	0.155125	0.0974125	0.138329	0.0764636
1	132950245	132950330	2986	85	132950281	1526	2841	0.95144	132950277	132950283	7	GAAAGTTTTTCATTCTTTTT	1_-_17164	NM_008551	-	'PA'	132950271	132950291	871	305	593	299	773	0.899793	0.844875	0.902588	0.861671	0.923536
1	20793028	20793112	620	84	20793096	191	594	0.958065	20793047	20793097	51	ACATGTGGACTTCATGCTTT	1_-_17215	NM_008563	-	'PA'	20793085	20793105	69	165	184	65	111	1	1	1	1	1
1	130228143	130228186	1376	43	130228168	956	1316	0.956395	130228164	130228169	6	ATTGTCTGTTGGATTCATTT	1_-_17219	NM_008567	-	'PA'	130228158	130228178	171	411	338	178	218	1	1	1	1	1
1	134887858	134887891	131	33	134887874	121	127	0.969466	134887874	134887875	2	ACCCTGGTGTTATGTAATGT	1_-_17248	NM_008575	-	'3'UTR'	134886422	134888232	32	14	34	10	37	0.121673	0.0933333	0.159624	0.0775194	0.111446
1	134882778	134882815	900	37	134882798	706	859	0.954444	134882796	134882798	3	ATTGTGTTTTGTCATTATTG	1_-_17248	NM_008575	-	'extend_3'TUR'	134881422	134886421	197	123	168	102	269	0.749049	0.82	0.788732	0.790698	0.810241
1	9657473	9657516	301	43	9657494	147	292	0.9701	9657488	9657496	9	AAGCTGGCTTGGCATTGCTC	1_-_17864	NM_008651	-	'PA'	9657482	9657502	89	77	48	22	56	1	1	1	1	1
1	51806808	51806851	365	43	51806834	237	352	0.964384	51806825	51806838	14	ATTTGCTGGATTACAACTGT	1_-_17912	NM_001290982	-	'3'UTR'	51806602	51808016	80	57	90	44	81	0.191388	0.2375	0.32491	0.29932	0.262136
1	51807842	51807886	541	44	51807869	246	520	0.961183	51807859	51807873	15	AGTTTTAATTATCAGAATAG	1_-_17912	NM_001290982	-	'3'UTR'	51806602	51808016	194	94	99	41	92	0.464115	0.391667	0.357401	0.278912	0.297735
1	51806591	51806654	513	63	51806612	373	494	0.962963	51806611	51806641	31	AAATTCTCCGAAGTCTTCGT	1_-_17912	NM_001290982	-	'PA'	51806592	51806612	133	89	83	59	130	0.318182	0.370833	0.299639	0.401361	0.420712
1	52514121	52514159	1693	38	52514141	1146	1618	0.9557	52514139	52514143	5	AAATCCTTGCTTAGAGTGCT	1_-_17936	NM_008667	-	'3'UTR'	52512693	52516061	414	190	490	189	335	0.745946	0.750988	0.790323	0.77459	0.756208
1	52515304	52515345	277	41	52515330	218	277	1	52515316	52515331	16	AAAAGCCTTGACTTAAAAAC	1_-_17936	NM_008667	-	'3'UTR'	52512693	52516061	76	27	83	36	55	0.136937	0.106719	0.133871	0.147541	0.124153
1	52515526	52515559	157	33	52515542	61	153	0.974522	52515540	52515546	7	AGAAGACTGTGTGTTTAATA	1_-_17936	NM_008667	-	'3'UTR'	52512693	52516061	45	25	30	16	37	0.0810811	0.0988142	0.0483871	0.0655738	0.0835214
1	13131340	13131380	162	40	13131362	57	154	0.950617	13131355	13131368	14	ACTAAGCAGCCCACTTTGAT	1_-_17978	NM_008678	-	'3'UTR'	13129240	13132841	58	27	31	21	17	0.360248	0.333333	0.306931	0.355932	0.155963
1	13129174	13129259	375	85	13129240	80	357	0.952	13129191	13129241	51	ATCATTTAATAAATTTTAAT	1_-_17978	NM_008678	-	'PA'	13129230	13129250	103	54	70	38	92	0.639752	0.666667	0.693069	0.644068	0.844037
1	171903012	171903056	750	44	171903033	367	722	0.962667	171903030	171903041	12	ATGTATCACATGTGTTAATT	1_-_18214	NM_022563	-	'3'UTR'	171902438	171907985	188	46	158	111	219	0.134478	0.127778	0.112938	0.179903	0.139936
1	171905137	171905173	410	36	171905157	267	399	0.973171	171905153	171905161	9	AAGTATGTGAGTAGTGTTTT	1_-_18214	NM_022563	-	'3'UTR'	171902438	171907985	98	26	150	43	82	0.0701001	0.0722222	0.107219	0.0696921	0.0523962
1	171902390	171902466	3731	76	171902439	2320	3580	0.959528	171902409	171902440	32	ATACAGTCTTCTTTCTGTCT	1_-_18214	NM_022563	-	'PA'	171902428	171902448	930	231	907	387	1125	0.665236	0.641667	0.64832	0.627229	0.71885
1	58520023	58520055	241	32	58520040	198	234	0.970954	58520039	58520043	5	AAACCTGCTGGTCTGCACTT	1_-_18393	NM_001025378	-	'3'UTR'	58519615	58521047	77	50	48	15	44	0.37931	0.27933	0.231884	0.223881	0.278481
1	58520297	58520334	307	37	58520317	198	292	0.95114	58520311	58520320	10	ACATTGACATTTTCTATTTT	1_-_18393	NM_001025378	-	'3'UTR'	58519615	58521047	63	61	79	21	68	0.310345	0.340782	0.381643	0.313433	0.43038
1	58520805	58520843	248	38	58520824	193	244	0.983871	58520821	58520824	4	ATTACTTCTCTGGAGACTTC	1_-_18393	NM_001025378	-	'3'UTR'	58519615	58521047	51	58	68	27	40	0.251232	0.324022	0.328502	0.402985	0.253165
1	58519603	58519632	46	29	58519619	18	44	0.956522	58519615	58519621	7	AGTCCTTTTGTAGTTTTGTT	1_-_18393	NM_001025378	-	'PA'	58519605	58519625	12	10	12	4	6	0.0591133	0.0558659	0.057971	0.0597015	0.0379747
1	78097830	78097865	63	35	78097853	27	61	0.968254	78097841	78097854	14	AAAATGTGCCCAACACTGCT	1_-_18505	NM_001159520	-	'3'UTR'	78097842	78099375	17	10	11	5	18	1	1	1	1	1
1	170050117	170050148	55	31	170050130	23	53	0.963636	170050130	170050137	8	AATGTTCATTGCGAGGATCG	1_-_18514	NM_008783	-	'3'UTR'	170049495	170113703	8	4	19	3	19	0.0629921	0.0493827	0.158333	0.04	0.124183
1	170083972	170084004	59	32	170083992	25	58	0.983051	170083983	170083993	11	TGCCCTCTTTCTCTCTCTTT	1_-_18514	NM_001291509	-	'3'UTR'	170083658	170088862	13	15	7	11	12	0.102362	0.185185	0.0583333	0.146667	0.0784314
1	170084992	170085042	294	50	170085019	93	285	0.969388	170085011	170085029	19	AAAGTTTTGTTTTGTGTTCT	1_-_18514	NM_001291509	-	'3'UTR'	170083658	170088862	70	41	57	32	85	0.551181	0.506173	0.475	0.426667	0.555556
1	170088445	170088506	144	61	170088462	52	137	0.951389	170088459	170088490	32	ATGCTGGTGGTTTGAGGAGG	1_-_18514	NM_001291509	-	'3'UTR'	170083658	170088862	31	19	32	28	27	0.244094	0.234568	0.266667	0.373333	0.176471
1	134010216	134010253	579	37	134010236	295	553	0.955095	134010233	134010239	7	AAAAAGCAGTGAGCAGTCTC	1_-_18557	NM_008795	-	'3'UTR'	134010124	134011512	141	45	157	57	153	1	1	1	1	1
1	88439573	88439614	314	41	88439591	111	304	0.968153	88439587	88439597	11	ATGCCGATGCTTCCATCTCC	1_-_18582	NM_008801	-	'PA'	88439580	88439600	79	34	73	45	73	1	1	1	1	1
1	174127563	174127610	1600	47	174127584	694	1534	0.95875	174127582	174127595	14	TGCCCTTTTTTGTGGTTTTT	1_-_18611	NM_011063	-	'3'UTR'	174126860	174128756	432	210	405	125	362	0.341772	0.387454	0.382075	0.331565	0.346743
1	174126839	174126881	2858	42	174126860	1586	2753	0.963261	174126859	174126866	8	ACCTGACTGATTCTAGAATC	1_-_18611	NM_011063	-	'PA'	174126850	174126870	832	332	655	252	682	0.658228	0.612546	0.617925	0.668435	0.653257
1	93312545	93312576	59	31	93312561	42	59	1	93312555	93312567	13	AACTGTATGCTTTGTTTGAT	1_-_18627	NM_011066	-	'PA'	93312549	93312569	10	5	8	8	28	1	1	1	1	1
1	132585744	132585778	95	34	132585760	62	91	0.957895	132585760	132585766	7	ACAATGAAATTTTCAATTCA	1_-_18640	NM_001162415	-	'3'UTR'	132585620	132587659	17	12	17	14	31	0.21519	0.315789	0.204819	0.358974	0.336957
1	132588817	132588853	251	36	132588838	143	240	0.956175	132588832	132588839	8	AACTTATTGGAAGGCTTCTG	1_-_18640	NM_008825	-	'PA'	132588822	132588842	62	26	66	25	61	0.78481	0.684211	0.795181	0.641026	0.663043
1	151676732	151676779	2794	47	151676759	908	2711	0.970293	151676751	151676764	14	ACCACTAGAAACTTGAGTCT	1_-_18783	NM_008869	-	'PA'	151676742	151676762	543	367	538	438	825	0.992687	0.997283	0.99262	0.979866	0.996377
1	165176151	165176191	1896	40	165176171	915	1829	0.964662	165176170	165176176	7	AGTTTATGTGGTCTGGCTTA	1_-_18933	NM_175686	-	'3'UTR'	165175250	165184124	320	472	349	242	446	0.128308	0.254447	0.200921	0.184592	0.137569
1	165177681	165177729	834	48	165177709	611	798	0.956835	165177707	165177715	9	ACTCATCGTTTTTAAACAAT	1_-_18933	NM_175686	-	'3'UTR'	165175250	165184124	233	161	95	75	234	0.0934242	0.0867925	0.054692	0.0572082	0.0721777
1	165175209	165175275	6393	66	165175251	1908	6286	0.983263	165175231	165175256	26	ACAATGTCTTTTGTTATAAT	1_-_18933	NM_175686	-	'PA'	165175240	165175260	1549	955	954	769	2059	0.621091	0.514825	0.549223	0.586575	0.635102
1	165185387	165185437	936	50	165185417	367	907	0.969017	165185404	165185417	14	AACCTTTAGAGCACTCCTGT	1_-_18933	NM_001025570	-	'PA'	165185398	165185418	223	118	161	124	281	0.0894146	0.0636119	0.0926885	0.0945843	0.0866749
1	167795267	167795299	114	32	167795285	57	111	0.973684	167795280	167795287	8	TTCACATTGTCTGTGTCTCT	1_-_18986	NM_198934	-	'PA'	167795275	167795295	34	11	23	13	30	1	1	1	1	1
1	173207096	173207139	182	43	173207123	124	173	0.950549	173207120	173207131	12	GTTTGCTCTTTACTATTCAT	1_-_19044	NM_008911	-	'PA'	173207113	173207133	50	11	33	22	57	1	1	1	1	1
1	33510637	33510673	617	36	33510656	384	602	0.975689	33510654	33510659	6	ATATCTGTGCAAGTGGGAGT	1_-_19076	NM_008922	-	'PA'	33510643	33510663	129	135	137	60	141	1	1	1	1	1
1	182157118	182157154	582	36	182157137	441	555	0.953608	182157136	182157138	3	AATGCTGGTGTTTGGCCCCT	1_-_19165	NM_001128605	-	'PA'	182157125	182157145	193	54	100	57	151	1	1	1	1	1
1	121555266	121555290	21	24	121555279	20	20	0.952381	121555279	121555279	1	AAGTTATAGTGACAGAGTTA	1_-_19258	NM_019933	-	'3'UTR'	121554670	121556407	5	8	4	2	1	0.294118	0.666667	0.333333	0.2	0.0909091
1	121556375	121556403	22	28	121556391	11	21	0.954545	121556387	121556396	10	AAGTACTGGGAAACTGATTT	1_-_19258	NM_019933	-	'3'UTR'	121554670	121556407	4	4	2	5	6	0.235294	0.333333	0.166667	0.5	0.545455
1	121554607	121554632	22	25	121554621	16	21	0.954545	121554616	121554621	6	AAACAGAAGTCCCCCTATTC	1_-_19258	NM_019933	-	'extend_3'TUR'	121549670	121554669	8	0	6	3	4	0.470588	0	0.5	0.3	0.363636
1	75243589	75243668	1329	79	75243618	585	1267	0.953348	75243611	75243652	42	AACACGGATGCCTTTGAGGC	1_-_19275	NM_008985	-	'PA'	75243606	75243626	482	192	209	111	273	1	1	1	1	1
1	154365655	154365686	111	31	154365671	62	107	0.963964	154365670	154365675	6	AATGCGGAGTGTTCTTCATG	1_-_19731	NM_016846	-	'3'UTR'	154364660	154366138	42	6	17	11	31	0.152727	0.0697674	0.0829268	0.101852	0.109155
1	154365916	154365971	334	55	154365954	124	323	0.967066	154365941	154365956	16	CACTGATGCTCTTAGATCTG	1_-_19731	NM_016846	-	'3'UTR'	154364660	154366138	102	33	55	40	93	0.370909	0.383721	0.268293	0.37037	0.327465
1	154363870	154363926	115	56	154363895	72	112	0.973913	154363884	154363917	34	AAAGGGCTTGTATTTGGAGT	1_-_19731	NM_016846	-	'extend_3'TUR'	154359660	154364659	30	6	29	10	37	0.109091	0.0697674	0.141463	0.0925926	0.130282
1	154364061	154364110	72	49	154364083	36	69	0.958333	154364075	154364091	17	AAGTGGGTAAAACATGGCCT	1_-_19731	NM_016846	-	'extend_3'TUR'	154359660	154364659	8	7	19	7	28	0.0290909	0.0813953	0.0926829	0.0648148	0.0985915
1	154364642	154364681	360	39	154364661	163	347	0.963889	154364659	154364669	11	ATATCCAGATTGTAACAGGG	1_-_19731	NM_016846	-	'PA'	154364650	154364670	93	34	85	40	95	0.338182	0.395349	0.414634	0.37037	0.334507
1	145847821	145847868	221	47	145847850	75	212	0.959276	145847834	145847855	22	AAAAAGAAAAAAAGAGCATT	1_-_19735	NM_009061	-	'3'UTR'	145846468	145848809	58	12	26	24	92	0.414286	0.307692	0.361111	0.387097	0.444444
1	145848097	145848148	318	51	145848122	169	308	0.968553	145848113	145848136	24	AACATTTGGAAGTCCCGATG	1_-_19735	NM_009061	-	'3'UTR'	145846468	145848809	82	27	46	38	115	0.585714	0.692308	0.638889	0.612903	0.555556
1	171671787	171671825	345	38	171671805	166	330	0.956522	171671803	171671807	5	ATCCTGAGTGTGTTTTCAAT	1_-_19736	NM_009062	-	'3'UTR'	171671608	171673811	93	143	52	5	37	0.830357	0.781421	0.8	1	0.902439
1	171671595	171671626	79	31	171671610	44	76	0.962025	171671609	171671615	7	AATCTGCTTGGAAACACATT	1_-_19736	NM_009062	-	'PA'	171671598	171671618	19	40	13	0	4	0.169643	0.218579	0.2	0	0.097561
1	157122816	157122861	256	45	157122834	195	247	0.964844	157122829	157122836	8	AAATCTCTGGCCTTTTTCAT	1_-_19775	NM_011273	-	'3'UTR'	157122787	157128139	68	30	39	35	75	0.367568	0.337079	0.258278	0.37234	0.403226
1	157125889	157125924	201	35	157125906	132	193	0.960199	157125905	157125913	9	AGCCCTGTGAATTGTCAGCT	1_-_19775	NM_011273	-	'3'UTR'	157122787	157128139	46	28	55	22	42	0.248649	0.314607	0.364238	0.234043	0.225806
1	157122758	157122807	232	49	157122791	98	224	0.965517	157122775	157122794	20	AGTGTGCTGACTCGTCACTG	1_-_19775	NM_011273	-	'PA'	157122777	157122797	68	28	47	27	54	0.367568	0.314607	0.311258	0.287234	0.290323
1	153316618	153316683	918	65	153316644	324	876	0.954248	153316637	153316665	29	AAATTTTATCTAAGCAGAAA	1_-_19821	NM_011277	-	'3'UTR'	153316536	153318445	285	108	161	77	245	0.508021	0.606742	0.577061	0.583333	0.59466
1	153317492	153317526	319	34	153317510	211	307	0.962382	153317508	153317511	4	AGATATTTTGCACTTTAGCC	1_-_19821	NM_011277	-	'3'UTR'	153316536	153318445	133	18	52	26	78	0.237077	0.101124	0.18638	0.19697	0.18932
1	153316516	153316554	287	38	153316539	152	281	0.979094	153316530	153316541	12	AGTGAAGTTATTAGATGTGT	1_-_19821	NM_011277	-	'PA'	153316526	153316546	95	39	51	22	74	0.16934	0.219101	0.182796	0.166667	0.179612
1	16091356	16091406	20626	50	16091379	6742	19902	0.964899	16091377	16091386	10	AAATGTGTCGGAGTCTTTGT	1_-_19989	NM_011291	-	'PA'	16091366	16091386	13205	5920	11582	4866	11678	1	1	1	1	1
1	36605473	36605522	207	49	36605500	109	197	0.951691	36605485	36605506	22	AACCCTGCCACACAGATATT	1_-_20353	NM_001126047	-	'3'UTR'	36605485	36606383	93	12	32	12	48	1	1	1	1	1
1	108667715	108667754	1192	39	108667735	907	1162	0.974832	108667733	108667736	4	ACTTTTGGCTTTTATATGTT	1_-_20479	NM_009190	-	'3'UTR'	108667365	108669023	278	152	297	157	278	0.634703	0.678571	0.708831	0.679654	0.630385
1	108668428	108668467	126	39	108668451	97	121	0.960317	108668449	108668456	8	AGTGGGCTTTTATAACTCCA	1_-_20479	NM_009190	-	'3'UTR'	108667365	108669023	27	10	27	13	44	0.0616438	0.0446429	0.0644391	0.0562771	0.0997732
1	108668557	108668660	215	103	108668585	51	209	0.972093	108668578	108668644	67	AATCTTTACTCTCAGGGATG	1_-_20479	NM_009190	-	'3'UTR'	108667365	108669023	69	22	37	25	56	0.157534	0.0982143	0.0883055	0.108225	0.126984
1	135500426	135500483	10073	57	135500457	7253	9737	0.966644	135500449	135500458	10	AAAATTTTACATTGTTTCAT	1_-_20643	NM_009227	-	'PA'	135500438	135500458	2154	1778	2462	1118	2225	1	1	1	1	1
1	158359897	158359962	1596	65	158359924	1024	1524	0.954887	158359918	158359930	13	AAGGACATGTACTCATATGT	1_-_20652	NM_009230	-	'3'UTR'	158358239	158361189	252	370	389	225	288	0.785047	0.767635	0.782696	0.836431	0.757895
1	158360679	158360747	211	68	158360707	57	201	0.952607	158360694	158360734	41	AATCTTGTTATGCATTCTGC	1_-_20652	NM_009230	-	'3'UTR'	158358239	158361189	45	56	38	20	42	0.140187	0.116183	0.0764588	0.0743494	0.110526
1	135278865	135278893	46	28	135278881	25	46	1	135278878	135278881	4	AGGACGTGCCCTTTCTCTGC	1_-_20668	NM_011439	-	'PA'	135278867	135278887	12	4	6	12	12	1	1	1	1	1
1	79790833	79790924	5326	91	79790898	3874	5070	0.951934	79790894	79790904	11	AACGTCTCGCTGGACACCAT	1_-_20720	NM_009255	-	'PA'	79790886	79790906	1249	343	645	460	2373	0.996013	0.997093	0.987749	0.991379	0.99664
1	145602834	145602863	44	29	145602851	37	44	1	145602845	145602851	7	AAAAAGAAAAAAAGGTTTAA	1_-_20822	NM_013835	-	'3'UTR'	145597921	145604871	26	2	6	2	8	0.128079	0.02	0.0512821	0.0307692	0.05
1	145603753	145603800	35	47	145603766	10	34	0.971429	145603765	145603791	27	AATTACATGTTTTCACTGGG	1_-_20822	NM_013835	-	'3'UTR'	145597921	145604871	15	10	4	0	5	0.0738916	0.1	0.034188	0	0.03125
1	145604017	145604056	70	39	145604042	22	68	0.971429	145604038	145604048	11	ATAGATTTTCTGTACCCCTA	1_-_20822	NM_013835	-	'3'UTR'	145597921	145604871	13	13	21	4	17	0.0640394	0.13	0.179487	0.0615385	0.10625
1	145597904	145597939	501	35	145597923	443	477	0.952096	145597921	145597923	3	AAATAACTGTCTTTTAATCA	1_-_20822	NM_013835	-	'PA'	145597911	145597931	144	72	82	56	123	0.70936	0.72	0.700855	0.861538	0.76875
1	157851698	157851759	271	61	157851744	143	261	0.9631	157851712	157851745	34	ATTCTGTATGTTATAAACTT	1_-_208263	NM_001160019	-	'3'UTR'	157851729	157854054	40	29	78	41	73	0.136054	0.2	0.268041	0.328	0.244147
1	157853469	157853501	168	32	157853486	161	161	0.958333	157853486	157853486	1	AAAAGGAAGAAGGGAAAAAA	1_-_208263	NM_001160019	-	'3'UTR'	157851729	157854054	54	10	45	11	41	0.183673	0.0689655	0.154639	0.088	0.137124
1	157853885	157853949	744	64	157853913	199	708	0.951613	157853905	157853936	32	AACCAGCCTAATTATCTGTG	1_-_208263	NM_001160019	-	'3'UTR'	157851729	157854054	195	105	161	69	178	0.663265	0.724138	0.553265	0.552	0.595318
1	93825340	93825373	190	33	93825357	137	188	0.989474	93825356	93825362	7	ATCTCTGCTACCTCCTTGTG	1_-_208727	NM_207225	-	'extend_3'TUR'	93824332	93829331	43	13	44	27	61	0.68254	0.393939	0.733333	0.658537	0.772152
1	93828631	93828657	37	26	93828645	25	36	0.972973	93828645	93828646	2	AAAGACGTGTGTTAGCTCTG	1_-_208727	NM_207225	-	'extend_3'TUR'	93824332	93829331	7	7	6	5	11	0.111111	0.212121	0.1	0.121951	0.139241
1	93828748	93828790	54	42	93828776	18	52	0.962963	93828764	93828781	18	ATATTCCACTGTATTCCAAG	1_-_208727	NM_207225	-	'extend_3'TUR'	93824332	93829331	13	13	10	9	7	0.206349	0.393939	0.166667	0.219512	0.0886076
1	80497631	80497665	194	34	80497649	124	187	0.963918	80497644	80497650	7	ACTTGATTTCCTTTGGGGAG	1_-_210293	NM_001285927	-	'PA'	80497633	80497653	31	7	55	9	85	1	1	1	1	1
1	127810204	127810230	21	26	127810219	10	21	1	127810214	127810221	8	ACCCTATAAGAGCAGAAAAG	1_-_210356	NM_001081756	-	'PA'	127810203	127810223	7	1	4	0	9	1	1	1	0	1
1	37889530	37889557	34	27	37889542	15	34	1	37889542	37889549	8	AAGTCTTTGTGTGGACATAT	1_-_211484	NM_001290721	-	'intron'	37876486	37891030	7	7	11	4	5	1	1	1	1	1
1	10127634	10127688	1585	54	10127669	440	1527	0.963407	10127651	10127672	22	AGTGCAGTGTAACCCACAGC	1_-_211673	NM_001102430	-	'3'UTR'	10127588	10128912	426	210	332	178	381	0.8875	0.893617	0.902174	0.912821	0.85426
1	10128326	10128362	123	36	10128347	89	118	0.95935	10128344	10128349	6	ATTGTTCCTCCTGCACTGTT	1_-_211673	NM_001102430	-	'3'UTR'	10127588	10128912	36	12	23	11	36	0.075	0.0510638	0.0625	0.0564103	0.0807175
1	40828871	40828897	32	26	40828885	23	31	0.96875	40828881	40828887	7	AACGTGTGTGTGTGTGTCGT	1_-_211798	NM_172499	-	'PA'	40828875	40828895	18	2	1	2	8	1	1	1	1	1
1	13615959	13616024	68	65	13616011	22	65	0.955882	13615975	13616016	42	ATTATGTGATTAATAATAAG	1_-_212442	NM_145381	-	'3'UTR'	13615980	13616941	7	5	17	15	21	0.0679612	0.0568182	0.113333	0.168539	0.126506
1	13616815	13616854	554	39	13616835	371	531	0.958484	13616832	13616840	9	AACCCTTGATACTTGTAATC	1_-_212442	NM_145381	-	'3'UTR'	13615980	13616941	96	83	133	74	145	0.932039	0.943182	0.886667	0.831461	0.873494
1	56850809	56850847	184	38	56850833	84	178	0.967391	56850826	56850836	11	AAATCTGACTTTGTTTGTCA	1_-_212712	NM_139146	-	'PA'	56850815	56850835	49	43	26	26	34	1	1	1	1	1
1	58579752	58579781	90	29	58579768	77	88	0.977778	58579764	58579768	5	AAATATTGTGTCTCCTGAGG	1_-_213056	NM_172513	-	'3'UTR'	58579650	58586501	15	13	19	13	28	0.405405	0.325	0.387755	0.419355	0.35
1	58582928	58582955	41	27	58582941	22	41	1	58582941	58582945	5	ATCAGTGTTTCTAACTATTT	1_-_213056	NM_172513	-	'3'UTR'	58579650	58586501	4	4	10	6	17	0.108108	0.1	0.204082	0.193548	0.2125
1	58579636	58579670	113	34	58579657	53	108	0.955752	58579651	58579657	7	AACTGGATTTCCCTGAGTTG	1_-_213056	NM_172513	-	'PA'	58579640	58579660	18	23	20	12	35	0.486486	0.575	0.408163	0.387097	0.4375
1	30859888	30859916	81	28	30859903	62	77	0.950617	30859903	30859904	2	AAGCTTCTTCTCAAGACATT	1_-_213109	NM_001081080	-	'3'UTR'	30859187	30860643	22	7	22	7	19	0.0639535	0.0353535	0.0643275	0.059322	0.0560472
1	30859930	30859970	754	40	30859949	545	722	0.95756	30859947	30859950	4	ACTTTGTGTGTGTGATTTGA	1_-_213109	NM_001081080	-	'3'UTR'	30859187	30860643	175	102	191	56	198	0.508721	0.515152	0.55848	0.474576	0.584071
1	30860367	30860406	127	39	30860392	95	123	0.968504	30860379	30860392	14	AGTTTTATTCCTTAATTGGT	1_-_213109	NM_001081080	-	'3'UTR'	30859187	30860643	36	17	31	14	25	0.104651	0.0858586	0.0906433	0.118644	0.0737463
1	30886255	30886289	186	34	30886275	104	183	0.983871	30886270	30886276	7	AATGGAATGGCTATTTTTCT	1_-_213109	NM_001081080	-	'intron'	30881365	30886687	34	22	59	25	43	0.0988372	0.111111	0.172515	0.211864	0.126844
1	30859166	30859208	209	42	30859188	60	199	0.952153	30859182	30859190	9	TGGTCTACTTTTATTTTTGG	1_-_213109	NM_001081080	-	'PA'	30859177	30859197	49	46	37	16	51	0.142442	0.232323	0.108187	0.135593	0.150442
1	33802311	33802349	1112	38	33802331	787	1070	0.96223	33802330	33802333	4	AACTTCTAGCATTGGCCATT	1_-_213539	NM_145392	-	'PA'	33802319	33802339	207	270	283	132	178	1	1	1	1	1
1	34870048	34870092	2211	44	34870072	1486	2134	0.965174	34870064	34870072	9	ATATTCTGACCTTTTCGTGG	1_-_214469	NM_001160236	-	'PA'	34870053	34870073	612	297	539	217	469	0.874286	0.868421	0.885057	0.871486	0.907157
1	145454873	145454932	737	59	145454906	385	701	0.951153	145454891	145454912	22	AAATAGACTGTAGTGATTTT	1_-_214498	NM_145991	-	'3'UTR'	145454629	145455650	145	136	197	99	124	0.463259	0.561983	0.544199	0.538043	0.3875
1	145450735	145450767	182	32	145450752	133	182	1	145450748	145450753	6	AACCAATGAGTTAAATCCTT	1_-_214498	NM_145991	-	'extend_3'TUR'	145449629	145454628	34	20	32	25	71	0.108626	0.0826446	0.0883978	0.13587	0.221875
1	145454565	145454604	86	39	145454580	33	86	1	145454577	145454592	16	AGTAAGATATTTTACTATTC	1_-_214498	NM_145991	-	'extend_3'TUR'	145449629	145454628	19	17	22	12	16	0.0607029	0.0702479	0.0607735	0.0652174	0.05
1	145454613	145454665	227	52	145454630	73	218	0.960352	145454627	145454648	22	ATGTGTGTGTGTTCAATGTG	1_-_214498	NM_145991	-	'PA'	145454619	145454639	72	29	52	21	44	0.230032	0.119835	0.143646	0.11413	0.1375
1	193922518	193922550	27	32	193922537	9	26	0.962963	193922528	193922544	17	TTAATGACCATTTTTGTTAA	1_-_214742	NM_001290282	-	'3'UTR'	193922429	193924691	5	7	4	4	6	0.0387597	0.125	0.038835	0.0833333	0.0425532
1	193922634	193922670	367	36	193922652	250	354	0.964578	193922651	193922659	9	TCCATGTCTTCTATTTTTAT	1_-_214742	NM_001290282	-	'3'UTR'	193922429	193924691	102	32	80	33	107	0.790698	0.571429	0.776699	0.6875	0.758865
1	193922409	193922449	75	40	193922425	30	74	0.986667	193922421	193922440	20	AACGAAAAAGTATTTAATTC	1_-_214742	NM_001290282	-	'PA'	193922419	193922439	15	14	12	9	24	0.116279	0.25	0.116505	0.1875	0.170213
1	194672456	194672488	149	32	194672472	99	145	0.973154	194672470	194672478	9	ACGCCGGGTTGTCTCATTGC	1_-_214791	NM_001177794	-	'3'UTR'	194670682	194672566	52	6	26	16	45	0.0815047	0.0451128	0.0764706	0.111111	0.0685976
1	194670647	194670708	1852	61	194670683	1501	1766	0.953564	194670680	194670683	4	ATTTTGGTTTTTTAAAATTT	1_-_214791	NM_001177794	-	'PA'	194670672	194670692	586	127	314	128	611	0.918495	0.954887	0.923529	0.888889	0.931402
1	36475630	36475656	24	26	36475645	18	24	1	36475640	36475645	6	AAACCACCTGACCTTTGATT	1_-_214895	NM_001013374	-	'extend_3'TUR'	36475031	36480030	1	2	9	7	5	0.0185185	0.0487805	0.123288	0.194444	0.060241
1	36475730	36475755	25	25	36475743	16	24	0.96	36475742	36475746	5	ACTTGCCTTGGTCATGGTGT	1_-_214895	NM_001013374	-	'extend_3'TUR'	36475031	36480030	4	3	5	1	11	0.0740741	0.0731707	0.0684932	0.0277778	0.13253
1	36480014	36480051	251	37	36480036	106	239	0.952191	36480028	36480036	9	ACTCATGAGTTCTGGCTCAG	1_-_214895	NM_001013374	-	'PA'	36480021	36480041	49	36	59	28	67	0.907407	0.878049	0.808219	0.777778	0.807229
1	158608652	158608716	1200	64	158608677	831	1145	0.954167	158608673	158608702	30	ATATTATTGTATAATGTCTT	1_-_215015	NM_145413	-	'extend_3'TUR'	158603702	158608701	333	153	189	101	369	0.970845	0.974522	0.969231	0.980583	0.986631
1	194933450	194933497	141	47	194933483	78	136	0.964539	194933465	194933485	21	AATTTTTATTTTATGCGTAT	1_-_215193	NM_145415	-	'3'UTR'	194930597	194933736	38	24	35	10	29	1	1	1	1	1
1	137159264	137159312	668	48	137159292	232	643	0.962575	137159288	137159299	12	AGATAAGTTGGAGTTATAGA	1_-_215615	NM_001159624	-	'3'UTR'	137159276	137159547	152	110	149	76	156	1	1	1	1	1
1	188448073	188448124	306	51	188448105	152	291	0.95098	188448100	188448111	12	ACTACAAATTCAATTTTTTT	1_-_21808	NM_009367	-	'3'UTR'	188447065	188449326	114	50	38	22	67	0.395833	0.505051	0.481013	0.44	0.39645
1	188446649	188446685	406	36	188446667	210	394	0.970443	188446664	188446670	7	ATGTTGCTGTGTTCTTCCTG	1_-_21808	NM_009367	-	'extend_3'TUR'	188442065	188447064	174	49	41	28	102	0.604167	0.494949	0.518987	0.56	0.60355
1	137198071	137198143	1430	72	137198125	600	1363	0.953147	137198111	137198129	19	AACCTTTCCTTTGAAAGTTA	1_-_21854	NM_011590	-	'3'UTR'	137198112	137198494	419	249	279	136	280	0.455435	0.416388	0.411504	0.389685	0.464345
1	137198170	137198280	1758	110	137198260	451	1673	0.95165	137198195	137198264	70	AAAGAATGTATATGAGCTTA	1_-_21854	NM_011590	-	'3'UTR'	137198112	137198494	471	327	372	202	301	0.511957	0.546823	0.548673	0.578797	0.499171
1	95689138	95689184	809	46	95689167	400	791	0.97775	95689154	95689167	14	AAAAATATATCTCACGAGCT	1_-_21915	NM_001105667	-	'3'UTR'	95689153	95689409	130	177	186	100	198	0.65	0.638989	0.67148	0.636943	0.689895
1	95697054	95697089	403	35	95697073	322	385	0.955335	95697070	95697074	5	ATTTGGTTTTTGGTTTTGTT	1_-_21915	NM_023136	-	'PA'	95697062	95697082	61	97	87	54	86	0.305	0.350181	0.314079	0.343949	0.299652
1	73960466	73960510	899	44	73960485	442	857	0.953281	73960483	73960489	7	TGTCTGTGTCCCTTGTGATA	1_-_21961	NM_001289895	-	'3'UTR'	73956805	73961103	200	154	292	93	118	0.301659	0.364929	0.361386	0.327465	0.211091
1	73956787	73956830	1915	43	73956807	856	1852	0.967102	73956806	73956813	8	AGCCTGTGGCCTGGCTTCGT	1_-_21961	NM_001289895	-	'PA'	73956795	73956815	458	264	505	186	439	0.690799	0.625592	0.625	0.65493	0.785331
1	120196884	120196935	166	51	120196917	78	163	0.981928	120196897	120196922	26	AACTTTATTTTGCCCATCTT	1_-_22099	NM_011650	-	'3'UTR'	120195095	120197380	41	28	43	14	37	0.0789981	0.111111	0.109974	0.0707071	0.0842825
1	120195075	120195115	1622	40	120195097	1153	1545	0.952528	120195092	120195098	7	AAAGTAGTGTGCTGCTGTTT	1_-_22099	NM_011650	-	'PA'	120195085	120195105	453	208	328	173	383	0.872832	0.825397	0.838875	0.873737	0.872437
1	75212106	75212152	1061	46	75212131	589	1025	0.96607	75212125	75212131	7	ATGGTTTCTTGTCCCCTTTG	1_-_22145	NM_009447	-	'3'UTR'	75211549	75212196	229	99	317	122	258	0.962185	0.99	0.981424	0.938462	0.973585
1	59696365	59696414	1199	49	59696384	311	1160	0.967473	59696382	59696399	18	ACACTGCTTTTGATTCTGTT	1_-_22218	NM_009460	-	'3'UTR'	59696278	59697043	366	150	279	120	245	0.113173	0.101146	0.112409	0.108794	0.0813413
1	59696259	59696308	10310	49	59696282	6582	10154	0.984869	59696279	59696288	10	ATTACTGAAGCTCCTTTTAT	1_-_22218	NM_009460	-	'PA'	59696268	59696288	2868	1333	2203	983	2767	0.886827	0.898854	0.887591	0.891206	0.918659
1	121441595	121441628	59	33	121441615	23	59	1	121441604	121441617	14	AGTTCATGTTTTATGAGCTG	1_-_226352	NM_145506	-	'PA'	121441600	121441620	27	3	13	5	11	1	1	1	1	1
1	129850844	129850869	29	25	129850857	17	29	1	129850856	129850859	4	ATTTTGTCTCCTGGTCCTCG	1_-_226409	NM_001285945	-	'3'UTR'	129850756	129851543	5	6	4	5	9	0.833333	0.375	0.235294	0.384615	0.310345
1	129850747	129850777	54	30	129850762	40	52	0.962963	129850760	129850768	9	ATTTTTAAATTATGGGTACG	1_-_226409	NM_001285945	-	'PA'	129850746	129850766	1	10	13	8	20	0.166667	0.625	0.764706	0.615385	0.689655
1	130260258	130260308	3293	50	130260285	2223	3188	0.968114	130260283	130260287	5	ATGATAGTGTTGTGTGACTT	1_-_226414	NM_177445	-	'PA'	130260274	130260294	660	454	790	414	870	1	1	1	1	1
1	133025004	133025037	148	33	133025019	77	144	0.972973	133025019	133025026	8	AGTGCATTGTTTTCATTCTC	1_-_226419	NM_145508	-	'PA'	133025008	133025028	54	18	40	11	21	1	1	1	1	1
1	137281017	137281080	1742	63	137281052	1388	1676	0.962113	137281050	137281057	8	AATTTAGTCTGCATACTCTA	1_-_226432	NM_153774	-	'3'UTR'	137278892	137281943	363	330	365	259	359	0.658802	0.772834	0.657658	0.729577	0.668529
1	137278874	137278915	563	41	137278894	211	544	0.966252	137278889	137278895	7	TCTTCTGTCTCCTGTCAGTT	1_-_226432	NM_153774	-	'PA'	137278882	137278902	132	65	145	72	130	0.239564	0.152225	0.261261	0.202817	0.242086
1	152208418	152208462	2114	44	152208443	1547	2036	0.963103	152208437	152208443	7	AACATTAATGTGGAATTTTA	1_-_226499	NM_001077237	-	'PA'	152208431	152208451	556	175	418	200	687	0.982332	0.988701	0.992874	0.995025	0.988489
1	154684214	154684246	92	32	154684233	54	88	0.956522	154684228	154684234	7	ATTTGATTTGATTTGGGGTT	1_-_226517	NM_001160257	-	'3'UTR'	154684125	154686401	25	16	20	9	18	0.0584112	0.0914286	0.0645161	0.0608108	0.0582524
1	154684106	154684146	1322	40	154684126	791	1260	0.953101	154684124	154684130	7	AGATCGGTGTGTAGAGGATT	1_-_226517	NM_001160257	-	'PA'	154684115	154684135	395	157	285	136	287	0.922897	0.897143	0.919355	0.918919	0.928803
1	155068361	155068402	169	41	155068377	75	162	0.95858	155068376	155068389	14	ACCGGAACTTTCCCTTGTTT	1_-_226519	NM_010683	-	'3'UTR'	155066052	155068602	48	13	34	17	50	0.169014	0.0616114	0.101796	0.0928962	0.15625
1	155066034	155066081	1106	47	155066053	541	1053	0.95208	155066053	155066062	10	ATATCTTGTGTGGCCTAAAT	1_-_226519	NM_010683	-	'PA'	155066042	155066062	203	186	263	147	254	0.714789	0.881517	0.787425	0.803279	0.79375
1	159070178	159070206	24	28	159070194	9	23	0.958333	159070188	159070198	11	AAAACTAGACTAGGAATGAT	1_-_226525	NM_177644	-	'3'UTR'	159065314	159070841	3	3	11	2	4	0.0352941	0.0454545	0.120879	0.0322581	0.0384615
1	159070538	159070587	37	49	159070577	10	36	0.972973	159070549	159070577	29	AATAATGTAGATTACCTTTT	1_-_226525	NM_177644	-	'3'UTR'	159065314	159070841	6	2	16	4	8	0.0705882	0.030303	0.175824	0.0645161	0.0769231
1	159199078	159199125	28	47	159199103	9	27	0.964286	159199088	159199117	30	AAAGGAAAGGAAAGGAAAAA	1_-_226525	NM_177644	-	'intron'	159160277	159216861	9	4	5	5	4	0.105882	0.0606061	0.0549451	0.0806452	0.0384615
1	159065302	159065340	330	38	159065321	193	322	0.975758	159065316	159065326	11	AGACTAAGAGTTGCTACTAT	1_-_226525	NM_177644	-	'PA'	159065304	159065324	67	57	59	51	88	0.788235	0.863636	0.648352	0.822581	0.846154
1	163018494	163018543	326	49	163018527	231	316	0.969325	163018509	163018529	21	AAAAATGTTTTAATTTTTAA	1_-_226541	NM_001039482	-	'3'UTR'	163018509	163020557	89	45	73	39	70	1	1	1	1	1
1	163746956	163746994	1070	38	163746976	903	1018	0.951402	163746973	163746977	5	AATCACTGGCTCTTCTGTCC	1_-_226551	NM_172645	-	'3'UTR'	163746243	163748496	305	130	213	141	229	0.884058	0.849673	0.894958	0.921569	0.854478
1	163747725	163747759	78	34	163747740	31	75	0.961538	163747736	163747748	13	ACTTAACTATTTGTGATGAT	1_-_226551	NM_172645	-	'3'UTR'	163746243	163748496	23	13	12	7	20	0.0666667	0.0849673	0.0504202	0.0457516	0.0746269
1	164602997	164603035	152	38	164603020	108	146	0.960526	164603017	164603025	9	ATCTCCCCTCTTCCTGGATG	1_-_226562	NM_001081290	-	'3'UTR'	164601916	164603532	58	20	31	12	25	0.256637	0.37037	0.31	0.307692	0.219298
1	164634644	164634670	30	26	164634659	28	30	1	164634653	164634659	7	AAAAAGGGAAATAGCGAAGA	1_-_226562	NM_001081290	-	'exon'	164634500	164636752	13	1	7	3	6	0.0575221	0.0185185	0.07	0.0769231	0.0526316
1	164640406	164640437	33	31	164640421	26	33	1	164640414	164640432	19	AAGAAAGGTATGGTGCCCCA	1_-_226562	NM_001081290	-	'exon'	164640414	164640960	17	3	6	2	5	0.0752212	0.0555556	0.06	0.0512821	0.0438596
1	164640477	164640514	223	37	164640498	191	219	0.982063	164640489	164640499	11	AAAAAGAGGAAAAAGTTGAA	1_-_226562	NM_001081290	-	'exon'	164640414	164640960	113	19	30	12	45	0.5	0.351852	0.3	0.307692	0.394737
1	164600840	164600872	58	32	164600859	22	56	0.965517	164600852	164600861	10	ACTTCTGCCTTGTCTGCAAT	1_-_226562	NM_001081290	-	'extend_3'TUR'	164596916	164601915	8	6	18	3	21	0.0353982	0.111111	0.18	0.0769231	0.184211
1	164601900	164601935	50	35	164601921	15	49	0.98	164601914	164601925	12	AATGAGTCTTGGAACTTCTA	1_-_226562	NM_001081290	-	'PA'	164601906	164601926	17	5	8	7	12	0.0752212	0.0925926	0.08	0.179487	0.105263
1	167145031	167145075	2145	44	167145054	1157	2097	0.977622	167145048	167145058	11	ATTCATAGTTTGCTGTTTAT	1_-_226591	NM_145513	-	'3'UTR'	167142417	167145870	528	300	479	216	574	0.93617	0.96463	0.939216	0.931034	0.955075
1	167579063	167579087	25	24	167579076	24	25	1	167579075	167579076	2	CGGGTTGGTTCTTATTCTGA	1_-_226594	NM_178593	-	'PA'	167579066	167579086	4	3	4	1	13	1	1	1	1	1
1	172634762	172634827	653	65	172634808	411	621	0.950995	172634788	172634810	23	TGTTGTCTGTCTGTACAAAG	1_-_226641	NM_001081304	-	'3'UTR'	172634588	172640009	113	100	121	73	214	0.523148	0.540541	0.444853	0.536765	0.648485
1	172637507	172637550	176	43	172637533	56	169	0.960227	172637525	172637538	14	AAATGGCTCAGTGGTTAACT	1_-_226641	NM_001081304	-	'3'UTR'	172634588	172640009	22	32	55	27	33	0.101852	0.172973	0.202206	0.198529	0.1
1	172638799	172638853	306	54	172638832	165	291	0.95098	172638822	172638832	11	AAAAAGCAAAGTTATGTTCA	1_-_226641	NM_001081304	-	'3'UTR'	172634588	172640009	63	50	79	31	68	0.291667	0.27027	0.290441	0.227941	0.206061
1	173164968	173165010	5580	42	173164991	4327	5388	0.965591	173164988	173164992	5	AAGCTCAGCTTGTAATGTGT	1_-_226646	NM_153064	-	'PA'	173164981	173165001	1535	656	1351	567	1279	1	1	1	1	1
1	175653544	175653574	74	30	175653561	55	71	0.959459	175653556	175653562	7	AAAGCAGTGTGCATTTGGGA	1_-_226691	NM_001204910	-	'PA'	175653549	175653569	2	3	25	11	30	1	1	1	1	1
1	175942106	175942140	47	34	175942120	38	46	0.978723	175942120	175942130	11	AAAGTGCAGTGTGTCATTTG	1_-_226695	NM_172648	-	'PA'	175942119	175942139	3	0	2	0	41	1	0	1	0	1
1	181675098	181675140	165	42	181675125	118	158	0.957576	181675109	181675126	18	ATTTGTCAAATGATTCACAA	1_-_226747	NM_026375	-	'3'UTR'	181675035	181676463	20	34	39	25	40	0.0389864	0.0747253	0.0939759	0.124378	0.0970874
1	181676202	181676241	1538	39	181676223	1180	1475	0.959038	181676221	181676224	4	ACACTGTGTGTCTGGTAGAT	1_-_226747	NM_026375	-	'3'UTR'	181675035	181676463	412	317	298	139	309	0.803119	0.696703	0.718072	0.691542	0.75
1	181675009	181675048	272	39	181675028	173	262	0.963235	181675027	181675033	7	AAATACTGTCAAGTTAATAA	1_-_226747	NM_026375	-	'PA'	181675025	181675045	57	79	54	25	47	0.111111	0.173626	0.13012	0.124378	0.114078
1	183105191	183105232	787	41	183105212	563	776	0.986023	183105207	183105213	7	AAATTAACTGGTTATTAGTG	1_-_226757	NM_145514	-	'3'UTR'	183103357	183107936	198	80	186	98	214	0.139929	0.113314	0.151837	0.135546	0.140236
1	183105984	183106046	1924	62	183106006	1333	1858	0.965696	183106002	183106012	11	ATATAATTAAGTGGCAACTC	1_-_226757	NM_145514	-	'3'UTR'	183103357	183107936	444	260	414	222	518	0.313781	0.368272	0.337959	0.307054	0.33945
1	183107195	183107262	1715	67	183107243	1212	1634	0.95277	183107240	183107246	7	ATTAAAGTGACTTCATTTGT	1_-_226757	NM_145514	-	'3'UTR'	183103357	183107936	441	193	371	219	410	0.311661	0.273371	0.302857	0.302905	0.268676
1	183103341	183103380	913	39	183103363	453	881	0.964951	183103358	183103364	7	AAGTAATTCTCGTTGCGTTC	1_-_226757	NM_145514	-	'PA'	183103347	183103367	201	113	157	129	281	0.142049	0.160057	0.128163	0.178423	0.184142
1	186720649	186720688	99	39	186720669	27	95	0.959596	186720662	186720679	18	AGCTGTGAATCACCTGTTTG	1_-_226778	NM_145515	-	'3'UTR'	186720303	186722402	31	12	10	12	30	0.236641	0.214286	0.153846	0.307692	0.294118
1	186721941	186721973	69	32	186721959	43	66	0.956522	186721955	186721963	9	AAAATTGTAGCATGAAGTTT	1_-_226778	NM_145515	-	'3'UTR'	186720303	186722402	20	13	9	12	12	0.152672	0.232143	0.138462	0.307692	0.117647
1	186722104	186722142	242	38	186722128	114	232	0.958678	186722119	186722128	10	AAAACCTGTATAGTTGTCTA	1_-_226778	NM_145515	-	'3'UTR'	186720303	186722402	80	31	46	15	60	0.610687	0.553571	0.707692	0.384615	0.588235
1	187911725	187911776	134	51	187911761	105	129	0.962687	187911750	187911768	19	AATTTACTGACTTTCAGATT	1_-_226791	NM_146106	-	'3'UTR'	187911611	187912407	29	6	26	12	56	1	1	1	1	1
1	190795020	190795061	110	41	190795047	95	105	0.954545	190795044	190795049	6	ACTATGTTGCCAGTGGTTTC	1_-_226823	NM_172650	-	'3'UTR'	190794977	190796003	30	14	25	12	24	0.163934	0.125	0.189394	0.181818	0.165517
1	190794958	190794994	549	36	190794977	408	533	0.970856	190794974	190794979	6	AAAGCAGTGTGTCTTCAGTT	1_-_226823	NM_172650	-	'PA'	190794967	190794987	153	98	107	54	121	0.836066	0.875	0.810606	0.818182	0.834483
1	191709054	191709085	140	31	191709070	117	138	0.985714	191709070	191709075	6	AAGATGGTCTCCTGTGTGCT	1_-_226830	NM_026796	-	'intron'	191707878	191709177	67	15	27	10	19	0.288793	0.119048	0.106719	0.0917431	0.0794979
1	191704354	191704390	854	36	191704373	732	821	0.961358	191704371	191704374	4	AAGCCTTGGTTTCTGAATGT	1_-_226830	NM_026796	-	'PA'	191704361	191704381	165	111	226	99	220	0.711207	0.880952	0.893281	0.908257	0.920502
1	192771611	192771653	560	42	192771635	368	534	0.953571	192771625	192771636	12	AAGGACTTCACGATGTTTGT	1_-_226841	NM_144879	-	'3'UTR'	192771525	192774062	195	61	115	60	103	1	1	1	1	1
1	192829696	192829744	554	48	192829728	395	529	0.954874	192829727	192829729	3	AATTTTATATGTCCTTTAAA	1_-_226844	NM_001081259	-	'3'UTR'	192829711	192832017	113	102	160	59	95	0.933884	0.971429	0.952381	0.880597	0.969388
1	192830121	192830158	30	37	192830133	11	30	1	192830132	192830151	20	ATATTCTTGTTTTGTTTTTT	1_-_226844	NM_001081259	-	'3'UTR'	192829711	192832017	8	3	8	8	3	0.0661157	0.0285714	0.047619	0.119403	0.0306122
1	193176811	193176852	54	41	193176839	13	52	0.962963	193176823	193176841	19	TGGGCGGTCGTTTTGTACAC	1_-_226849	NM_144880	-	'3'UTR'	193175860	193176855	17	11	8	8	8	0.0858586	0.127907	0.0625	0.153846	0.0512821
1	193175838	193175879	583	41	193175855	234	568	0.974271	193175855	193175865	11	ATGTCATTTGCTCTTTTGTC	1_-_226849	NM_144880	-	'PA'	193175850	193175870	181	75	120	44	148	0.914141	0.872093	0.9375	0.846154	0.948718
1	194478828	194478856	24	28	194478841	14	23	0.958333	194478839	194478846	8	AGCCTGGTATCTGTGTCTTT	1_-_226861	NM_144881	-	'intron'	194418971	194485337	10	0	3	1	9	0.10989	0	0.0247934	0.016129	0.0535714
1	194482923	194482953	27	30	194482936	12	26	0.962963	194482933	194482945	13	AGCTTGTGGATTGACTGAGT	1_-_226861	NM_144881	-	'intron'	194418971	194485337	11	4	3	1	7	0.120879	0.0588235	0.0247934	0.016129	0.0416667
1	194336691	194336726	483	35	194336710	425	461	0.954451	194336709	194336711	3	AAACACATGTGTCTTGATAC	1_-_226861	NM_144881	-	'PA'	194336700	194336720	70	64	115	60	152	0.769231	0.941176	0.950413	0.967742	0.904762
1	21388471	21388501	57	30	21388489	25	55	0.964912	21388483	21388491	9	AAACAGCTAGTGTGACTGCT	1_-_226922	NM_001160139	-	'PA'	21388474	21388494	22	23	2	1	7	1	1	1	1	1
1	36754939	36754976	1013	37	36754959	690	981	0.968411	36754957	36754960	4	CTTATGAGTAAATATAGCCG	1_-_226977	NM_146107	-	'extend_3'TUR'	36751047	36756046	227	118	282	119	235	0.192863	0.262806	0.338942	0.307494	0.280095
1	36756015	36756102	2761	87	36756049	994	2703	0.978993	36756045	36756059	15	AAGGCCCGGTGTGTGGCTCT	1_-_226977	NM_146107	-	'PA'	36756037	36756057	950	331	550	268	604	0.807137	0.737194	0.661058	0.692506	0.719905
1	46864370	46864419	1263	49	46864389	868	1216	0.962787	46864388	46864395	8	TGTGGTGTGTTTTCATTGTC	1_-_227059	NM_172653	-	'PA'	46864379	46864399	564	162	164	84	242	0.944724	0.875676	0.836735	0.8	0.858156
1	53246019	53246062	131	43	53246035	71	125	0.954198	53246035	53246051	17	AAAATTTTGTTTTCACGTCC	1_-_227099	NM_153556	-	'PA'	53246022	53246042	22	33	21	17	32	1	1	1	1	1
1	63094359	63094395	422	36	63094377	339	406	0.962085	63094374	63094378	5	AACCTTGCTTTTATTAATTA	1_-_227195	NM_001114609	-	'PA'	63094365	63094385	82	77	83	59	105	1	1	1	1	1
1	63190148	63190195	1610	47	63190177	687	1543	0.958385	63190165	63190178	14	AAAAACACTGATATTAAAGT	1_-_227197	NM_001160040	-	'3'UTR'	63190166	63190404	439	209	337	158	400	1	1	1	1	1
1	74326398	74326439	1514	41	74326421	850	1478	0.976222	74326415	74326421	7	ATTGGCAGTGTCTGTGTGCA	1_-_227290	NM_001190444	-	'PA'	74326404	74326424	440	140	343	178	377	1	1	1	1	1
1	84366398	84366432	230	34	84366416	159	223	0.969565	84366415	84366420	6	ACTCACTTGTCTCATTCTTT	1_-_227325	NM_152915	-	'PA'	84366404	84366424	116	47	29	9	22	1	1	1	1	1
1	89841494	89841523	21	29	89841506	13	20	0.952381	89841506	89841516	11	AAGAACTGGCTGTTGAGTAG	1_-_227334	NM_001198573	-	'extend_3'TUR'	89836696	89841695	3	3	4	4	6	0.0322581	0.0882353	0.0377358	0.114286	0.0550459
1	89841679	89841740	373	61	89841703	171	357	0.957105	89841695	89841717	23	AGTCCTCAACTCTGTCATAT	1_-_227334	NM_001198573	-	'PA'	89841686	89841706	90	31	102	31	103	0.967742	0.911765	0.962264	0.885714	0.944954
1	99602704	99602756	733	52	99602737	318	713	0.972715	99602718	99602740	23	AGTGACTTGAATTTAAAGCA	1_-_227399	NM_173760	-	'3'UTR'	99602620	99604294	196	113	148	84	172	0.899083	0.974138	0.907975	0.884211	0.843137
1	69577778	69577813	84	35	69577800	70	80	0.952381	69577795	69577802	8	AAATTATTTGGTACAAAAAC	1_-_22779	NM_011770	-	'3'UTR'	69577784	69585341	24	16	16	9	15	0.827586	0.666667	0.666667	0.75	0.681818
1	69578673	69578707	31	34	69578696	18	31	1	69578682	69578696	15	AACATTTCTTTGGCATTTCT	1_-_22779	NM_011770	-	'3'UTR'	69577784	69585341	5	8	8	3	7	0.172414	0.333333	0.333333	0.25	0.318182
1	178952550	178952582	39	32	178952571	19	39	1	178952559	178952572	14	AATTGGTCATCGAGTCACCT	1_-_23797	NM_011785	-	'3'UTR'	178952246	178955494	14	8	9	3	5	0.109375	0.091954	0.126761	0.0731707	0.0387597
1	178955176	178955239	58	63	178955228	18	56	0.965517	178955188	178955229	42	AATTTCACAATCTTTGGGAG	1_-_23797	NM_011785	-	'3'UTR'	178952246	178955494	16	6	14	6	14	0.125	0.0689655	0.197183	0.146341	0.108527
1	178950191	178950224	222	33	178950208	154	211	0.95045	178950207	178950210	4	ATCATGGGTATTTGTTTTCT	1_-_23797	NM_011785	-	'extend_3'TUR'	178947246	178952245	53	39	26	15	78	0.414062	0.448276	0.366197	0.365854	0.604651
1	178952228	178952265	155	37	178952247	51	150	0.967742	178952246	178952254	9	TGCTTCTCTGTTTGTTGTTG	1_-_23797	NM_011785	-	'PA'	178952236	178952256	45	34	22	17	32	0.351562	0.390805	0.309859	0.414634	0.248062
1	78421641	78421679	1634	38	78421661	1261	1563	0.956548	78421660	78421662	3	ACTCCTTGCGTAGCTGCATT	1_-_23874	NM_001278075	-	'3'UTR'	78414533	78421768	317	280	447	190	329	0.954819	1	0.971739	0.954774	0.953623
1	176764417	176764484	461	67	176764445	147	448	0.9718	176764437	176764470	34	AAAAGCTGAATTCTGCACTT	1_-_23893	NM_011825	-	'3'UTR'	176763916	176766905	52	188	99	57	52	0.0822785	0.0987395	0.0932203	0.118503	0.0766962
1	176763897	176763955	4274	58	176763926	1376	4161	0.973561	176763916	176763927	12	ACAAAACTGCATACGTGTGA	1_-_23893	NM_011825	-	'PA'	176763906	176763926	550	1668	933	407	603	0.870253	0.87605	0.878531	0.846154	0.889381
1	162948819	162948853	27	34	162948837	14	26	0.962963	162948826	162948843	18	CTGGTGACTCCAAGAGCTAT	1_-_240869	NM_173424	-	'3'UTR'	162947887	162950051	5	7	8	0	6	1	1	1	0	1
1	168028267	168028296	63	29	168028284	43	60	0.952381	168028280	168028284	5	AAATATTTCTTCATTCTGGT	1_-_240892	NM_001160049	-	'PA'	168028269	168028289	9	1	16	18	16	1	1	1	1	1
1	54532375	54532407	69	32	54532394	45	68	0.985507	54532388	54532395	8	AAAACATGTTCCATACTCTG	1_-_241062	NM_001163314	-	'3'UTR'	54529844	54537549	8	12	19	8	21	0.296296	0.631579	0.678571	0.727273	0.525
1	54529832	54529864	58	32	54529852	40	57	0.982759	54529841	54529853	13	ACATTTGGTACAAAGATTGT	1_-_241062	NM_001163314	-	'PA'	54529834	54529854	19	7	9	3	19	0.703704	0.368421	0.321429	0.272727	0.475
1	63229253	63229281	21	28	63229270	13	20	0.952381	63229263	63229271	9	AAAAAGTATCAGGCTGGGTT	1_-_241070	NM_146250	-	'3'UTR'	63229145	63229586	3	3	4	3	7	1	1	1	1	1
1	64835676	64835714	201	38	64835696	169	192	0.955224	64835690	64835697	8	ACTTTCTCTCATATCAGCTT	1_-_241075	NM_001039493	-	'PA'	64835685	64835705	59	20	33	21	59	1	1	1	1	1
1	75177419	75177456	753	37	75177440	627	732	0.972112	75177435	75177441	7	ATCTGGTTGTGGCATCTTTT	1_-_245860	NM_001288613	-	'PA'	75177425	75177445	223	67	155	64	223	1	1	1	1	1
1	79603432	79603469	41	37	79603458	23	39	0.95122	79603446	79603460	15	ATGTTAATGTTGAACTTGGA	1_-_252903	NM_183027	-	'PA'	79603441	79603461	15	7	7	1	9	1	1	1	1	1
1	80263365	80263471	2836	106	80263427	830	2719	0.958745	80263390	80263434	45	AGCTCATTAAAATAAAATTG	1_-_26554	NM_016716	-	'3'UTR'	80263393	80263730	685	471	646	303	614	0.888457	0.862637	0.853369	0.851124	0.830853
1	80262162	80262208	311	46	80262186	97	300	0.96463	80262178	80262194	17	TCCCCATGCGTCTTGGATTA	1_-_26554	NM_016716	-	'extend_3'TUR'	80258393	80263392	58	51	64	39	88	0.075227	0.0934066	0.0845443	0.109551	0.11908
1	10014887	10014933	5423	46	10014914	3435	5163	0.952056	10014906	10014915	10	AAATTGTCCTTCTGTGGTTT	1_-_26754	NM_001277101	-	'3'UTR'	10014681	10015059	1470	671	1129	594	1299	0.991234	0.991137	0.986026	0.99	0.982602
1	125366174	125366200	39	26	125366188	37	38	0.974359	125366188	125366189	2	AAAAAGGGGGAATGGGTGGG	1_-_269109	NM_199021	-	'intron'	125341899	125382470	6	9	5	2	16	1	1	1	1	1
1	135793749	135793789	47	40	135793777	24	47	1	135793758	135793778	21	AGTTAAATGTATTATACTGA	1_-_269120	NM_001160421	-	'PA'	135793761	135793781	13	4	11	5	14	1	1	1	1	1
1	95206395	95206433	112	38	95206412	52	107	0.955357	95206410	95206420	11	ACAAGGAGTGTTTAAGTTCT	1_-_269224	NM_080850	-	'3'UTR'	95206014	95206668	18	35	15	19	20	1	1	1	1	1
1	173270690	173270723	58	33	173270704	30	56	0.965517	173270704	173270715	12	AATTCTGTCTTGACTTGGTT	1_-_27045	NM_001242580	-	'extend_3'TUR'	173267368	173272367	8	10	17	4	17	0.0366972	0.131579	0.111842	0.0465116	0.0794393
1	173272352	173272406	726	54	173272376	290	690	0.950413	173272367	173272380	14	ATAATGTCTGGACATGTCTT	1_-_27045	NM_001242580	-	'PA'	173272358	173272378	210	66	135	82	197	0.963303	0.868421	0.888158	0.953488	0.920561
1	107415342	107415395	97	53	107415378	42	93	0.958763	107415367	107415385	19	TTCTCTGATGAAGTGTTTAG	1_-_27392	NM_013784	-	'3'UTR'	107414999	107418580	32	5	19	10	27	0.217687	0.0632911	0.128378	0.16129	0.139175
1	107415496	107415529	117	33	107415513	96	112	0.957265	107415511	107415514	4	ATATGTCACTAATTTTCTCT	1_-_27392	NM_013784	-	'3'UTR'	107414999	107418580	24	17	24	13	34	0.163265	0.21519	0.162162	0.209677	0.175258
1	107417675	107417733	86	58	107417696	33	82	0.953488	107417689	107417723	35	ATATTCTAGCTAGACCAAAG	1_-_27392	NM_013784	-	'3'UTR'	107414999	107418580	24	10	14	15	19	0.163265	0.126582	0.0945946	0.241935	0.0979381
1	107414981	107415032	351	51	107415005	190	343	0.977208	107414998	107415005	8	AACTGGTTTTCTTGTGATAA	1_-_27392	NM_013784	-	'PA'	107414989	107415009	67	47	91	24	114	0.455782	0.594937	0.614865	0.387097	0.587629
1	4764361	4764397	194	36	4764384	60	185	0.953608	4764376	4764384	9	ATGATCTGAGTCCCTGGTCT	1_-_27395	NM_001177658	-	'3'UTR'	4763279	4766544	44	27	45	24	45	0.156028	0.145161	0.142857	0.169014	0.180723
1	4764491	4764529	128	38	4764512	69	122	0.953125	4764509	4764519	11	ACATCTGACCAGCATCTGGC	1_-_27395	NM_001177658	-	'3'UTR'	4763279	4766544	25	22	31	18	26	0.0886525	0.11828	0.0984127	0.126761	0.104418
1	4766437	4766480	840	43	4766462	201	803	0.955952	4766454	4766465	12	AGCCTTCACTGCTCAGGTCT	1_-_27395	NM_001177658	-	'3'UTR'	4763279	4766544	193	121	222	94	173	0.684397	0.650538	0.704762	0.661972	0.694779
1	16334262	16334297	214	35	16334279	151	206	0.962617	16334278	16334286	9	ACCCACTGCTCATTTATAAA	1_-_29819	NM_001111272	-	'intron'	16221173	16335784	71	27	29	17	62	0.316964	0.306818	0.223077	0.220779	0.292453
1	16334358	16334392	398	34	16334376	322	381	0.957286	16334372	16334376	5	AAAAGACTTTGATTCATATA	1_-_29819	NM_001111272	-	'intron'	16221173	16335784	111	47	72	38	113	0.495536	0.534091	0.553846	0.493506	0.533019
1	16371275	16371304	92	29	16371291	86	91	0.98913	16371290	16371291	2	AACTTGCTTCTTGGTCATGA	1_-_29819	NM_001111272	-	'intron'	16364893	16379901	28	10	17	13	23	0.125	0.113636	0.130769	0.168831	0.108491
1	16218870	16218900	54	30	16218885	22	53	0.981481	16218880	16218890	11	ATGAGTTGTTCCTTCAGTCC	1_-_29819	NM_001111272	-	'PA'	16218881	16218901	14	4	12	9	14	0.0625	0.0454545	0.0923077	0.116883	0.0660377
1	158585133	158585194	581	61	158585154	287	558	0.960413	158585148	158585155	8	AACATCCTTTCTTACTGAGA	1_-_30935	NM_023141	-	'3'UTR'	158583748	158585823	160	21	136	44	197	0.80402	0.84	0.683417	0.785714	0.794355
1	158583731	158583764	175	33	158583750	124	169	0.965714	158583743	158583750	8	AAGTGCTGATGGTTCTTCCT	1_-_30935	NM_023141	-	'PA'	158583738	158583758	39	4	63	12	51	0.19598	0.16	0.316583	0.214286	0.205645
1	74484291	74484316	33	25	74484305	22	32	0.969697	74484303	74484305	3	AGCAGGAGTCTCCTTTTGTC	1_-_319651	NM_176972	-	'3'UTR'	74482084	74485964	8	6	9	1	8	0.296296	0.222222	0.236842	0.0625	0.216216
1	74482069	74482099	115	30	74482085	99	113	0.982609	74482084	74482086	3	ATATTAGTTTGATTTATTTG	1_-_319651	NM_176972	-	'PA'	74482074	74482094	19	21	29	15	29	0.703704	0.777778	0.763158	0.9375	0.783784
1	113755263	113755324	726	61	113755284	339	717	0.987603	113755279	113755312	34	ATTTTACGTTGTATAGTGTT	1_-_319901	NM_001081316	-	'PA'	113755269	113755289	241	74	118	65	219	0.919847	0.936709	0.929134	0.928571	0.956332
1	151923777	151923802	25	25	151923790	16	24	0.96	151923787	151923791	5	ACTTTCTTTTTTCATTTCTG	1_-_320019	NR_015466	-	'exon'	151922003	151924175	3	3	9	6	3	1	1	1	1	1
1	192596741	192596774	279	33	192596759	154	276	0.989247	192596758	192596761	4	GTCTGCCTTCCTCATTTAAT	1_-_320119	NM_178775	-	'PA'	192596748	192596768	63	33	63	38	79	1	1	1	1	1
1	107173481	107173507	21	26	107173496	12	20	0.952381	107173490	107173496	7	AAGTAGACTCATGCATTTTT	1_-_320311	NM_001160368	-	'PA'	107173484	107173504	14	0	1	1	4	1	0	1	1	1
1	33908884	33908914	73	30	33908899	58	71	0.972603	33908898	33908905	8	AATGCACTTTCTTATGGTTC	1_-_320705	NM_177235	-	'PA'	33908887	33908907	10	13	11	11	26	1	1	1	1	1
1	90596754	90596795	617	41	90596772	327	592	0.959481	90596771	90596781	11	ATTGGAGGTGGTGGCAGTAC	1_-_320982	NM_177305	-	'3'UTR'	90594801	90597660	176	91	117	74	134	0.387665	0.292605	0.407666	0.364532	0.333333
1	90594782	90594820	1121	38	90594803	887	1065	0.950045	90594800	90594804	5	AAACAGTTGGAGGCGTTTTC	1_-_320982	NM_177305	-	'PA'	90594791	90594811	278	220	170	129	268	0.612335	0.707395	0.592334	0.635468	0.666667
1	10630282	10630306	27	24	10630295	26	26	0.962963	10630295	10630295	1	TTAAAAAAAAAAAGACATTT	1_-_329093	NM_001289497	-	'intron'	10585777	10709692	13	13	0	0	0	1	1	0	0	0
1	53868003	53868032	76	29	53868019	58	73	0.960526	53868017	53868022	6	AAACTGCTTTTACTCGTTTG	1_-_329152	NM_001001883	-	'3'UTR'	53863718	53870065	26	7	15	10	15	0.787879	0.7	0.75	0.666667	0.535714
1	53863704	53863730	34	26	53863718	31	33	0.970588	53863718	53863719	2	AATTATGACTTTTCTGTTAT	1_-_329152	NM_001001883	-	'PA'	53863708	53863728	7	3	5	5	13	0.212121	0.3	0.25	0.333333	0.464286
1	54702169	54702211	699	42	54702191	154	687	0.982833	54702185	54702198	14	GTTGCAATGTGTGTTTTCTT	1_-_329154	NM_001081433	-	'PA'	54702174	54702194	185	65	173	74	190	1	1	1	1	1
1	136879863	136879891	47	28	136879879	27	45	0.957447	136879876	136879880	5	ACCATGTGTGTCTTTCTGTT	1_-_329252	NM_001033409	-	'extend_3'TUR'	136877930	136882929	3	35	2	0	5	1	1	1	0	1
1	162015150	162015175	22	25	162015165	17	22	1	162015159	162015165	7	AAAAAGCCGTCTCTTGTTAT	1_-_329278	NM_177839	-	'PA'	162015153	162015173	5	17	0	0	0	1	1	0	0	0
1	59157404	59157459	945	55	59157438	328	901	0.953439	59157426	59157444	19	ACAAGCTTTATTAACTGAAG	1_-_381259	NM_001037812	-	'PA'	59157431	59157451	238	117	178	98	270	1	1	1	1	1
1	72205795	72205821	33	26	72205809	24	32	0.969697	72205805	72205811	7	AAGTTGAGTGTGTGTTATAT	1_-_381269	NM_001005423	-	'PA'	72205797	72205817	11	6	3	2	10	1	1	1	1	1
1	165884123	165884159	184	36	165884141	123	175	0.951087	165884139	165884148	10	AAAATAATCTTTATTTGACA	1_-_381306	NM_201364	-	'PA'	165884129	165884149	32	53	32	27	31	1	1	1	1	1
1	175826458	175826529	1251	71	175826486	930	1193	0.953637	175826478	175826515	38	ACATCATTACAAAGTGCAGT	1_-_381308	NM_001033450	-	'PA'	175826476	175826496	79	69	352	202	491	1	1	1	1	1
1	187110561	187110600	2287	39	187110581	1774	2211	0.966769	187110580	187110584	5	ATTTAAGCTCTATGATATCT	1_-_381314	NM_198653	-	'3'UTR'	187110541	187110927	601	298	458	265	589	0.801333	0.743142	0.762063	0.754986	0.771953
1	187110501	187110555	601	54	187110519	169	571	0.950083	187110519	187110543	25	AAGAAGCTGTGGATGACGAA	1_-_381314	NM_198653	-	'extend_3'TUR'	187105541	187110540	123	94	126	76	152	0.164	0.234414	0.209651	0.216524	0.199214
1	38850505	38850537	23	32	38850525	7	22	0.956522	38850516	38850529	14	AACAAGGTGAATGACGAGTT	1_-_381338	NM_001029878	-	'extend_3'TUR'	38846354	38851353	6	3	5	0	8	1	1	1	0	1
1	180258672	180258788	9900	116	180258702	7310	9511	0.960707	180258696	180258703	8	AAATCCAGTTGTCTAATGGG	1_-_51810	NM_016805	-	'3'UTR'	180258431	180259484	2176	1587	2349	1085	2314	0.671398	0.616311	0.636068	0.661989	0.691986
1	180259147	180259195	2672	48	180259168	2378	2568	0.961078	180259165	180259169	5	ACCTGGTGTCTTTTATTAAG	1_-_51810	NM_016805	-	'3'UTR'	180258431	180259484	492	571	679	291	535	0.151805	0.221748	0.183861	0.177547	0.159988
1	180259423	180259470	1601	47	180259450	896	1529	0.955028	180259441	180259451	11	AAAACCTTCACAAGAAGTCG	1_-_51810	NM_016805	-	'3'UTR'	180258431	180259484	330	280	465	167	287	0.10182	0.108738	0.125914	0.101891	0.0858254
1	58011933	58011979	24	46	58011970	8	24	1	58011944	58011970	27	AAATATCTACTGGTATGTTT	1_-_51960	NM_001159865	-	'3'UTR'	58011945	58013171	5	2	6	3	8	0.0625	0.105263	0.130435	0.166667	0.131148
1	58012084	58012117	210	33	58012102	146	200	0.952381	58012099	58012104	6	AAAAATGTGACTTTTCTGTG	1_-_51960	NM_001159865	-	'3'UTR'	58011945	58013171	75	17	40	15	53	0.9375	0.894737	0.869565	0.833333	0.868852
1	99541574	99541612	136	38	99541596	89	132	0.970588	99541587	99541602	16	AAATTTGGGATACAAAGTAT	1_-_52392	NM_133825	-	'3'UTR'	99540479	99542291	27	34	26	20	25	0.272727	0.330097	0.361111	0.37037	0.342466
1	99540464	99540499	272	35	99540483	115	269	0.988971	99540479	99540486	8	ATCCATTGTTTCGTGGTGTT	1_-_52392	NM_133825	-	'PA'	99540469	99540489	72	69	46	34	48	0.727273	0.669903	0.638889	0.62963	0.657534
1	45964993	45965039	87	46	45965026	52	83	0.954023	45965006	45965026	21	AAAATGTTTGTAGAATCTTC	1_-_53945	NM_016917	-	'3'UTR'	45964915	45966250	28	1	24	4	26	1	1	1	1	1
1	133072971	133073010	444	39	133072989	319	428	0.963964	133072986	133072995	10	AAGTCACGATGGAATCGTCC	1_-_54354	NM_018750	-	'PA'	133072977	133072997	100	47	91	50	140	1	1	1	1	1
1	152409620	152409677	105	57	152409634	34	102	0.971429	152409633	152409666	34	AAAATGTGTTCCCTTATAGA	1_-_545370	NM_001024720	-	'PA'	152409622	152409642	54	4	13	3	28	1	1	1	1	1
1	39428694	39428723	52	29	39428712	15	50	0.961538	39428706	39428712	7	ACTGACTTTTTTAAAATGTC	1_-_54610	NM_018775	-	'3'UTR'	39428342	39429193	30	2	8	1	9	1	1	1	1	1
1	93308045	93308096	515	51	93308081	201	496	0.963107	93308060	93308082	23	AGTTGCTCCTGGTGTACTGT	1_-_55927	NM_019479	-	'3'UTR'	93308060	93308634	211	27	83	29	146	1	1	1	1	1
1	164804439	164804467	30	28	164804453	20	30	1	164804450	164804460	11	ATAAATTCTTAGTTCTTGAT	1_-_55990	NM_018881	-	'extend_3'TUR'	164800178	164805177	4	0	10	2	14	1	0	1	1	1
1	36849020	36849074	2217	54	36849046	1355	2112	0.952639	36849039	36849046	8	AAAAGCCTTGAATTGTTTTG	1_-_56030	NM_018872	-	'3'UTR'	36849034	36849765	634	295	459	237	487	0.98908	0.993266	0.978678	0.979339	0.974
1	38109425	38109459	32	34	38109441	13	31	0.96875	38109435	38109452	18	AACTCAAGTTCGAGATGATG	1_-_56210	NM_019570	-	'extend_3'TUR'	38104631	38109630	10	2	7	3	9	0.0952381	0.05	0.076087	0.0731707	0.0775862
1	38144389	38144448	80	59	38144409	15	77	0.9625	38144395	38144428	34	ACAGTGGTAATCTTAGATTA	1_-_56210	NM_019570	-	'intron'	38142498	38144815	14	9	24	7	23	0.133333	0.225	0.26087	0.170732	0.198276
1	38109616	38109655	296	39	38109641	112	286	0.966216	38109632	38109641	10	ATATTTTGTACAGGTTTTTT	1_-_56210	NM_019570	-	'PA'	38109621	38109641	81	29	61	31	84	0.771429	0.725	0.663043	0.756098	0.724138
1	133151161	133151192	80	31	133151179	44	76	0.95	133151172	133151180	9	TTCCTGCAGCTATGGTACCT	1_-_56489	NM_019777	-	'PA'	133151169	133151189	27	6	13	11	19	1	1	1	1	1
1	16984995	16985038	182	43	16985023	130	173	0.950549	16985020	16985027	8	AAAATTGGAAGTGTCTTTCC	1_-_57339	NM_020604	-	'PA'	16985011	16985031	23	30	39	28	53	1	1	1	1	1
1	136244006	136244059	89	53	136244027	32	88	0.988764	136244017	136244051	35	ATGATTTTGTATTTTGGGTT	1_-_57439	NM_001042485	-	'3'UTR'	136242674	136244585	16	15	29	10	18	0.0462428	0.0684932	0.0860534	0.0628931	0.0656934
1	136244066	136244118	451	52	136244099	321	430	0.953437	136244096	136244105	10	ATAAGATTGATTTGTGCATC	1_-_57439	NM_001042485	-	'3'UTR'	136242674	136244585	110	74	119	49	78	0.317919	0.3379	0.353116	0.308176	0.284672
1	136244315	136244398	187	83	136244372	50	178	0.951872	136244335	136244385	51	AGAAACCTGGCCTCATTTTC	1_-_57439	NM_001042485	-	'3'UTR'	136242674	136244585	38	34	41	22	43	0.109827	0.155251	0.121662	0.138365	0.156934
1	136242653	136242691	623	38	136242674	522	598	0.959872	136242673	136242676	4	TTCTGGCTCAACTTGTGAGT	1_-_57439	NM_001042485	-	'PA'	136242664	136242684	171	87	137	76	127	0.49422	0.39726	0.406528	0.477987	0.463504
1	60134523	60134557	99	34	60134539	70	95	0.959596	60134537	60134549	13	AATTCTGTCTACATTTTACC	1_-_57750	NM_001199061	-	'3'UTR'	60133712	60135007	22	16	17	10	30	0.0625	0.076555	0.0592334	0.0925926	0.105263
1	60134951	60135008	1033	57	60134988	789	984	0.952565	60134986	60134995	10	ACTTCCTTGTTGGGTCTTGT	1_-_57750	NM_001199061	-	'3'UTR'	60133712	60135007	298	157	226	84	219	0.846591	0.751196	0.787456	0.777778	0.768421
1	74640310	74640344	274	34	74640327	202	264	0.963504	74640326	74640333	8	ATCTAGCCTATGTGGTATGA	1_-_57751	NM_021313	-	'PA'	74640316	74640336	55	29	71	16	93	1	1	1	1	1
1	4899644	4899669	25	25	4899657	21	24	0.96	4899657	4899660	4	AAAGATATGTGGATATTTTC	1_-_58175	NM_001290372	-	'PA'	4899647	4899667	13	3	4	0	4	1	1	1	0	1
1	95518412	95518507	2021	95	95518485	1377	1924	0.952004	95518469	95518486	18	AAATGTTCTGATGTACAGAG	1_-_59041	NM_021537	-	'3'UTR'	95517328	95519063	600	177	372	201	574	1	1	1	1	1
1	140381340	140381384	180	44	140381357	112	172	0.955556	140381355	140381363	9	AAATTCAGTGTGATGTTTGC	1_-_59125	NM_021605	-	'3'UTR'	140381291	140383576	67	21	32	16	36	0.101824	0.0742049	0.0769231	0.0695652	0.0737705
1	140382582	140382619	377	37	140382602	183	361	0.95756	140382601	140382606	6	AATGAGTTCCCTTTTTAAAA	1_-_59125	NM_021605	-	'3'UTR'	140381291	140383576	82	64	86	41	88	0.12462	0.226148	0.206731	0.178261	0.180328
1	140380395	140380431	540	36	140380415	376	516	0.955556	140380412	140380416	5	AGAAAGGGATGATCATCGTC	1_-_59125	NM_021605	-	'extend_3'TUR'	140376291	140381290	192	32	97	67	128	0.291793	0.113074	0.233173	0.291304	0.262295
1	140380665	140380726	900	61	140380691	477	858	0.953333	140380689	140380713	25	AAGTTTTAGTATCTATCAGG	1_-_59125	NM_021605	-	'extend_3'TUR'	140376291	140381290	258	142	165	90	203	0.392097	0.501767	0.396635	0.391304	0.415984
1	173996211	173996245	328	34	173996230	213	320	0.97561	173996227	173996231	5	ATTTTTGTTGGGGTTTTTTC	1_-_59287	NM_021607	-	'3'UTR'	173996144	173996804	108	37	62	41	72	0.586957	0.493333	0.512397	0.546667	0.431138
1	173996133	173996168	317	35	173996152	284	302	0.952681	173996148	173996152	5	AATTTGTACTTGTTGTTTGG	1_-_59287	NM_021607	-	'PA'	173996134	173996154	76	38	59	34	95	0.413043	0.506667	0.487603	0.453333	0.568862
1	173149225	173149272	182	47	173149243	126	175	0.961538	173149238	173149248	11	ATTTCTCCTGGTTTCTCCAT	1_-_641376	NM_001037170	-	'3'UTR'	173147934	173149651	41	8	46	21	59	0.333333	0.228571	0.489362	0.525	0.504274
1	173149324	173149383	89	59	173149347	38	86	0.966292	173149335	173149372	38	ACTTTTTTTGTTATTTTTGT	1_-_641376	NM_001037170	-	'3'UTR'	173147934	173149651	25	14	20	6	21	0.203252	0.4	0.212766	0.15	0.179487
1	173147918	173147948	155	30	173147934	129	148	0.954839	173147934	173147935	2	AGCTCAGTGTTTCACAGATC	1_-_641376	NM_001037170	-	'PA'	173147924	173147944	57	13	28	13	37	0.463415	0.371429	0.297872	0.325	0.316239
1	121366865	121366913	1917	48	121366886	783	1865	0.972874	121366883	121366889	7	AGGATTTCGCCCTTTTTCCT	1_-_64143	NM_022327	-	'PA'	121366872	121366892	551	175	452	204	483	0.978686	1	0.974138	0.985507	0.991786
1	173059273	173059370	2578	97	173059296	1768	2513	0.974787	173059289	173059345	57	ATGCTTGACTCTTTGGAATC	1_-_66052	NM_025321	-	'PA'	173059278	173059298	831	245	505	272	660	0.977647	0.991903	0.994094	0.971429	0.980684
1	173218674	173218713	2460	39	173218695	2036	2361	0.959756	173218693	173218696	4	AGCCTGTGGTTCTCATTGAT	1_-_66155	NM_025388	-	'PA'	173218685	173218705	689	238	468	245	721	1	1	1	1	1
1	193130649	193130688	2228	39	193130669	1937	2122	0.952424	193130669	193130671	3	AGACTCTGTGTATGGTTCTT	1_-_66208	NM_025424	-	'PA'	193130666	193130686	683	183	409	163	684	1	1	1	1	1
1	121806265	121806301	67	36	121806288	49	64	0.955224	121806277	121806290	14	AGTGGTCTCTGAATTCCAGT	1_-_66343	NM_175106	-	'3'UTR'	121804478	121806588	20	2	14	7	21	1	1	1	1	1
1	166221271	166221319	484	48	166221302	370	463	0.956612	166221299	166221305	7	GTTAGTGCCCTTTCCTTTCA	1_-_66352	NM_001160209	-	'3'UTR'	166219931	166222356	96	61	97	66	143	0.631579	0.693182	0.646667	0.741573	0.6875
1	166221502	166221534	123	32	166221520	68	122	0.99187	166221515	166221521	7	ATCATAAGGTGCTCATTTGT	1_-_66352	NM_001160209	-	'3'UTR'	166219931	166222356	30	21	26	14	31	0.197368	0.238636	0.173333	0.157303	0.149038
1	166222229	166222274	70	45	166222258	18	67	0.957143	166222242	166222266	25	ACATACCCATGAAGCTATTT	1_-_66352	NM_001160209	-	'3'UTR'	166219931	166222356	16	5	16	7	23	0.105263	0.0568182	0.106667	0.0786517	0.110577
1	173103377	173103413	405	36	173103395	204	386	0.953086	173103393	173103396	4	TACGAGTGGTTTGTGTGGGT	1_-_66425	NM_025557	-	'PA'	173103385	173103405	56	122	66	51	91	1	1	1	1	1
1	169302073	169302113	80	40	169302100	48	77	0.9625	169302086	169302101	16	AAAGCTTCTTTCTTAAGCAA	1_-_66447	NM_025569	-	'extend_3'TUR'	169297515	169302514	49	13	4	2	9	0.644737	0.565217	0.4	0.4	0.409091
1	169302500	169302534	62	34	169302515	36	59	0.951613	169302510	169302521	12	AAAGCTCCTGCCTGCATCTC	1_-_66447	NM_025569	-	'PA'	169302505	169302525	27	10	6	3	13	0.355263	0.434783	0.6	0.6	0.590909
1	172228315	172228342	43	27	172228330	28	41	0.953488	172228329	172228330	2	TCTTGCTGGCTTGTCTTTTT	1_-_665574	NM_001198955	-	'PA'	172228314	172228334	10	5	11	7	8	1	1	1	1	1
1	154217846	154217899	1418	53	154217868	752	1357	0.956982	154217861	154217881	21	AAATCTGTCGTAATCATCCA	1_-_66637	NM_025677	-	'PA'	154217856	154217876	342	213	311	129	362	1	1	1	1	1
1	16559689	16559761	142	72	16559741	48	135	0.950704	16559704	16559749	46	TGACGGTATGTAAACCCATA	1_-_66799	NM_001271017	-	'3'UTR'	16558755	16561327	31	17	33	9	45	0.100649	0.0805687	0.0948276	0.0358566	0.110294
1	16559849	16559891	161	42	16559865	113	155	0.962733	16559864	16559869	6	AAGCTCTGTTTCTATGACAA	1_-_66799	NM_001271017	-	'3'UTR'	16558755	16561327	37	22	35	21	40	0.12013	0.104265	0.100575	0.0836653	0.0980392
1	16560199	16560247	672	48	16560221	297	649	0.965774	16560215	16560233	19	AACAAAAGAGTGTGGACATT	1_-_66799	NM_001271017	-	'3'UTR'	16558755	16561327	82	114	139	154	160	0.266234	0.540284	0.399425	0.613546	0.392157
1	16560619	16560656	379	37	16560639	185	362	0.955145	16560634	16560643	10	ACTCCTCAGTCTCTGAAGTG	1_-_66799	NM_001271017	-	'3'UTR'	16558755	16561327	93	27	92	44	106	0.301948	0.127962	0.264368	0.175299	0.259804
1	153215460	153215488	23	28	153215473	16	22	0.956522	153215471	153215480	10	AAAATGTTGTATTGACCAAT	1_-_66875	NM_025819	-	'3'UTR'	153214829	153215588	3	1	9	4	5	0.0681818	0.0714286	0.225	0.285714	0.135135
1	153214812	153214844	132	32	153214829	101	127	0.962121	153214828	153214832	5	ATTTTGCTTTTCCGTTTACT	1_-_66875	NM_025819	-	'PA'	153214819	153214839	41	13	31	10	32	0.931818	0.928571	0.775	0.714286	0.864865
1	94533696	94533756	7579	60	94533735	5130	7317	0.965431	94533733	94533739	7	AGGGTGATTTTAATTCCTGT	1_-_66915	NM_001163425	-	'3'UTR'	94533722	94533942	2133	746	1600	683	2155	1	1	1	1	1
1	123450388	123450449	1602	61	123450416	395	1526	0.952559	123450416	123450432	17	TTAATGTTTTTTATACCTTT	1_-_66942	NM_025860	-	'PA'	123450402	123450422	269	315	420	220	302	0.981752	0.993691	0.992908	0.960699	0.993421
1	171428420	171428468	210	48	171428443	96	207	0.985714	171428434	171428458	25	ACTACTGTTATCCAGGATGT	1_-_66977	NM_023284	-	'3'UTR'	171428065	171428919	8	79	57	37	26	1	1	1	1	1
1	95601949	95602003	1073	54	95601968	626	1033	0.962721	95601967	95601990	24	ATCACTGTGTAGACTGTACA	1_-_67026	NM_025920	-	'PA'	95601958	95601978	334	112	208	103	276	1	1	1	1	1
1	64653637	64653680	217	43	64653662	135	210	0.967742	64653658	64653667	10	ACCTAAACTTGTAGGTTAGA	1_-_67099	NM_025964	-	'3'UTR'	64653054	64654313	60	12	48	21	69	0.304569	0.139535	0.294479	0.228261	0.258427
1	64653921	64653962	150	41	64653948	65	143	0.953333	64653940	64653949	10	AAATGTGTGTACTGTTGGAG	1_-_67099	NM_025964	-	'3'UTR'	64653054	64654313	33	15	34	19	42	0.167513	0.174419	0.208589	0.206522	0.157303
1	64653031	64653069	472	38	64653054	154	452	0.957627	64653048	64653054	7	AAGAGTACCTGTCAGTGTTG	1_-_67099	NM_025964	-	'PA'	64653044	64653064	104	59	81	52	156	0.527919	0.686047	0.496933	0.565217	0.58427
1	188545083	188545145	127	62	188545132	48	121	0.952756	188545109	188545133	25	ACAGAAATTTAACCTGTTTT	1_-_67223	NM_026041	-	'3'UTR'	188544965	188545281	26	25	33	16	21	0.139037	0.138122	0.126923	0.140351	0.108247
1	188544948	188544985	854	37	188544968	703	815	0.954333	188544967	188544969	3	AAATCTCTGCTTCCCTGCTC	1_-_67223	NM_026041	-	'PA'	188544955	188544975	161	156	227	98	173	0.860963	0.861878	0.873077	0.859649	0.891753
1	138110085	138110123	68	38	138110099	22	65	0.955882	138110099	138110114	16	ATTCTGTGTGTGTGCTGAGT	1_-_67313	NM_028872	-	'PA'	138110089	138110109	24	7	11	4	19	1	1	1	1	1
1	182096733	182096758	30	25	182096746	22	29	0.966667	182096745	182096749	5	ATTTCCTATGCGTTCCGTGA	1_-_67426	NM_001163290	-	'3'UTR'	182095369	182097299	15	1	2	0	11	1	1	1	0	1
1	93272386	93272425	700	39	93272409	502	665	0.95	93272404	93272410	7	AGTTATTTGAGTGACTGGTC	1_-_67444	NM_023343	-	'PA'	93272398	93272418	251	43	132	54	185	0.94717	0.934783	0.916667	0.981818	0.968586
1	183020002	183020063	115	61	183020047	50	112	0.973913	183020032	183020052	21	ATCTTGATCATGCATAAAAG	1_-_67459	NM_026171	-	'extend_3'TUR'	183018554	183023553	39	11	20	6	36	0.280576	0.119565	0.135135	0.0967742	0.213018
1	183022906	183022948	118	42	183022932	75	113	0.957627	183022927	183022933	7	AATACACCTTTCTGATAGAC	1_-_67459	NM_026171	-	'extend_3'TUR'	183018554	183023553	21	11	40	16	25	0.151079	0.119565	0.27027	0.258065	0.147929
1	183023073	183023134	113	61	183023105	59	108	0.955752	183023088	183023124	37	AAAACTGCCATGCCAGAAAA	1_-_67459	NM_026171	-	'extend_3'TUR'	183018554	183023553	22	20	31	9	26	0.158273	0.217391	0.209459	0.145161	0.153846
1	183023527	183023568	269	41	183023549	125	257	0.95539	183023549	183023555	7	ATATCTATTAACATCTGAAC	1_-_67459	NM_026171	-	'PA'	183023544	183023564	53	46	54	29	75	0.381295	0.5	0.364865	0.467742	0.443787
1	39608124	39608168	3256	44	39608146	2543	3114	0.956388	39608144	39608148	5	AAAAATTTTTCTATGTAACA	1_-_67702	NM_001033135	-	'PA'	39608134	39608154	814	397	748	398	757	0.97136	0.977833	0.971429	0.973105	0.975515
1	43806120	43806153	78	33	43806140	42	76	0.974359	43806132	43806142	11	AAATTTCAGGATTGATTTTG	1_-_67883	NM_026430	-	'extend_3'TUR'	43802076	43807075	30	7	13	8	18	0.100671	0.0542636	0.0580357	0.0733945	0.0717131
1	43806341	43806394	419	53	43806378	270	399	0.952267	43806367	43806384	18	ATCAGACATGGGTTTTGAGC	1_-_67883	NM_026430	-	'extend_3'TUR'	43802076	43807075	99	36	106	40	118	0.332215	0.27907	0.473214	0.366972	0.47012
1	43806467	43806497	107	30	43806483	69	102	0.953271	43806478	43806484	7	ACTACTGTGTTGTGCTGCAT	1_-_67883	NM_026430	-	'extend_3'TUR'	43802076	43807075	37	8	21	13	23	0.124161	0.0620155	0.09375	0.119266	0.0916335
1	43806639	43806745	419	106	43806724	267	399	0.952267	43806691	43806736	46	AATTTTATTTATAAAAGTGG	1_-_67883	NM_026430	-	'extend_3'TUR'	43802076	43807075	117	75	81	47	79	0.392617	0.581395	0.361607	0.431193	0.314741
1	138164809	138164887	607	78	138164849	85	591	0.973641	138164829	138164870	42	AAAGTGCGTGTTGTCTTGTC	1_-_67886	NM_001081360	-	'3'UTR'	138164700	138167418	213	94	118	49	117	0.835294	0.652778	0.662921	0.653333	0.709091
1	138165723	138165759	232	36	138165745	96	226	0.974138	138165738	138165745	8	ACATTTTACCTTTCAGACAC	1_-_67886	NM_001081360	-	'3'UTR'	138164700	138167418	42	50	60	26	48	0.164706	0.347222	0.337079	0.346667	0.290909
1	16633306	16633374	6132	68	16633352	2167	5982	0.975538	16633327	16633352	26	AAACTGTTAATTTTTTTCAG	1_-_67923	NM_026456	-	'3'UTR'	16632846	16633368	1053	1061	1541	860	1467	0.601371	0.674079	0.656863	0.69299	0.65258
1	16631776	16631830	793	54	16631814	439	761	0.959647	16631807	16631815	9	AAAAGGTACGATCAGCACTT	1_-_67923	NM_026456	-	'extend_3'TUR'	16627846	16632845	194	94	204	81	188	0.110794	0.0597205	0.0869565	0.0652699	0.0836299
1	16632827	16632869	2046	42	16632847	1335	1997	0.976051	16632846	16632853	8	ATCTTGTGTTTTGTTTATTG	1_-_67923	NM_026456	-	'PA'	16632836	16632856	395	357	503	257	485	0.225585	0.226811	0.214408	0.207091	0.215747
1	184244202	184244242	259	40	184244221	79	247	0.953668	184244217	184244231	15	TCACAACAGCTGGATTTTTT	1_-_67948	NM_175127	-	'3'UTR'	184243233	184247021	78	26	52	29	62	0.219718	0.198473	0.236364	0.25	0.25
1	184245288	184245338	220	50	184245323	138	209	0.95	184245316	184245325	10	AAAAGATTTGTCAGCAAGGT	1_-_67948	NM_175127	-	'3'UTR'	184243233	184247021	46	31	52	29	51	0.129577	0.236641	0.236364	0.25	0.205645
1	184245669	184245711	125	42	184245697	94	119	0.952	184245690	184245697	8	AAACATCTGTTGCTTTGGAC	1_-_67948	NM_175127	-	'3'UTR'	184243233	184247021	45	19	31	10	14	0.126761	0.145038	0.140909	0.0862069	0.0564516
1	184246601	184246678	224	77	184246618	98	217	0.96875	184246613	184246648	36	ACACTATCTTGTTTTTTGTT	1_-_67948	NM_175127	-	'3'UTR'	184243233	184247021	82	37	31	20	47	0.230986	0.282443	0.140909	0.172414	0.189516
1	184243216	184243249	262	33	184243233	205	251	0.958015	184243232	184243237	6	TGGAGTTTTCATTCTTTCGA	1_-_67948	NM_175127	-	'PA'	184243223	184243243	93	18	51	23	66	0.261972	0.137405	0.231818	0.198276	0.266129
1	24002762	24002816	679	54	24002784	260	652	0.960236	24002779	24002803	25	TCTTTAGATTTATTATTTTA	1_-_68002	NM_026503	-	'PA'	24002768	24002788	207	59	114	64	208	1	1	1	1	1
1	24017914	24017955	155	41	24017930	51	150	0.967742	24017928	24017946	19	ACATTTGTAATGCTTGCTTA	1_-_68187	NM_026604	-	'3'UTR'	24017597	24019130	41	16	38	13	42	0.226519	0.213333	0.273381	0.245283	0.245614
1	24018429	24018458	63	29	24018446	29	62	0.984127	24018442	24018447	6	CTCTGCCGTGACTTGGCTGT	1_-_68187	NM_026604	-	'3'UTR'	24017597	24019130	17	6	15	4	20	0.0939227	0.08	0.107914	0.0754717	0.116959
1	24018501	24018542	396	41	24018522	186	383	0.967172	24018516	24018528	13	AACATTATTTCTCATGTTGA	1_-_68187	NM_026604	-	'3'UTR'	24017597	24019130	116	51	79	33	104	0.640884	0.68	0.568345	0.622642	0.608187
1	174560888	174560914	33	26	174560902	24	33	1	174560900	174560903	4	AATCTTGGCCATGTTTCTCA	1_-_68440	NM_026725	-	'PA'	174560890	174560910	12	3	8	1	9	1	1	1	1	1
1	167522353	167522391	1270	38	167522373	962	1226	0.965354	167522372	167522375	4	AATGGTGTTGTCTGCTTGTT	1_-_68481	NM_001001880	-	'3'UTR'	167522312	167523783	322	132	251	161	360	0.990769	0.956522	0.972868	0.993827	0.972973
1	66765919	66765955	66	36	66765937	37	64	0.969697	66765929	66765939	11	ATGCCTTGTATTGTGTGATT	1_-_68691	NM_001122738	-	'3'UTR'	66765817	66767349	13	3	23	4	21	0.371429	0.375	0.46	0.133333	0.403846
1	66782098	66782131	34	33	66782121	15	34	1	66782107	66782121	15	AAAAGAATAAATGCAAATCC	1_-_68691	NM_001122738	-	'intron'	66775150	66782210	12	1	4	13	4	0.342857	0.125	0.08	0.433333	0.0769231
1	66843880	66843909	28	29	66843899	13	27	0.964286	66843890	66843899	10	AAAGCAAGCATTCCAGTCTC	1_-_68691	NM_001122738	-	'intron'	66824683	66847622	3	2	8	5	9	0.0857143	0.25	0.16	0.166667	0.173077
1	66765807	66765846	52	39	66765822	21	50	0.961538	66765817	66765837	21	ATTCCATGCCTATTTGTCAG	1_-_68691	NM_001122738	-	'PA'	66765807	66765827	7	2	15	8	18	0.2	0.25	0.3	0.266667	0.346154
1	57445063	57445124	1178	61	57445091	487	1122	0.952462	57445080	57445094	15	ACATAAAGTCTATTGGTGGA	1_-_68736	NR_004860	-	'PA'	57445078	57445098	271	154	242	129	326	0.989051	0.9625	0.975806	0.977273	0.984894
1	134252875	134252913	528	38	134252893	261	502	0.950758	134252893	134252898	6	ATCCTGTCTGAGGTCTGCTG	1_-_68875	NM_178874	-	'PA'	134252882	134252902	175	72	103	35	117	1	1	1	1	1
1	192869698	192869739	144	41	192869726	74	137	0.951389	192869714	192869726	13	AAAAACTGTATTTTTAAAAA	1_-_68972	NM_001163422	-	'3'UTR'	192869709	192870188	29	20	20	14	54	1	1	1	1	1
1	37942056	37942086	23	30	37942069	20	22	0.956522	37942065	37942072	8	AAAAAGAAGGTAAAAGGCTC	1_-_69028	NM_026913	-	'exon'	37942060	37942161	17	1	0	2	2	0.175258	0.025641	0	0.0294118	0.0232558
1	37935715	37935754	413	39	37935735	329	394	0.953995	37935734	37935736	3	AATTTCTGGATCCACTCACC	1_-_69028	NM_026913	-	'PA'	37935725	37935745	80	38	126	66	84	0.824742	0.974359	1	0.970588	0.976744
1	75132322	75132362	1316	40	75132345	769	1263	0.959726	75132339	75132345	7	ATGGCCTGGCCTTTTCCTTC	1_-_69171	NM_026977	-	'3'UTR'	75131789	75132972	334	111	349	161	308	0.97093	0.940678	0.980337	0.975758	0.950617
1	79699604	79699640	253	36	79699621	153	244	0.964427	79699620	79699627	8	AATGTGTTCTTTACTGGTCC	1_-_69368	NM_001111279	-	'3'UTR'	79698837	79702085	63	45	59	25	52	0.305825	0.18595	0.175074	0.172414	0.185714
1	79698820	79698873	988	53	79698839	717	943	0.954453	79698835	79698842	8	AATTTGTGTAATTTTGTTTG	1_-_69368	NM_001111279	-	'PA'	79698827	79698847	136	196	274	114	223	0.660194	0.809917	0.813056	0.786207	0.796429
1	153737963	153737993	101	30	153737979	65	97	0.960396	153737978	153737981	4	ATTTGTGTTTGTACTTTATT	1_-_69399	NM_197990	-	'3'UTR'	153731654	153740523	24	14	24	12	23	0.3	0.233333	0.224299	0.235294	0.255556
1	153739699	153739731	185	32	153739716	152	177	0.956757	153739715	153739717	3	ATCCTTGTCTTCTCCCATTC	1_-_69399	NM_197990	-	'3'UTR'	153731654	153740523	36	29	52	22	38	0.45	0.483333	0.485981	0.431373	0.422222
1	153740352	153740381	86	29	153740367	65	84	0.976744	153740366	153740371	6	AACCTGCAGAGGAATATTGC	1_-_69399	NM_197990	-	'3'UTR'	153731654	153740523	17	14	25	10	18	0.2125	0.233333	0.233645	0.196078	0.2
1	153731640	153731666	31	26	153731654	23	30	0.967742	153731653	153731656	4	GTCCTGGCTCTGTTCTTTCT	1_-_69399	NM_197990	-	'PA'	153731644	153731664	3	3	6	7	11	0.0375	0.05	0.0560748	0.137255	0.122222
1	140748588	140748630	321	42	140748615	167	305	0.950156	140748604	140748617	14	AATGACCTGTTACGAATATT	1_-_69549	NM_001081226	-	'3'UTR'	140748556	140748678	86	42	47	35	95	0.480447	0.583333	0.385246	0.5	0.46798
1	140752250	140752286	79	36	140752267	37	76	0.962025	140752261	140752274	14	ATTGACAGCCTTTGACCGTT	1_-_69549	NM_001081226	-	'intron'	140750250	140753157	25	9	14	6	22	0.139665	0.125	0.114754	0.0857143	0.108374
1	140748540	140748579	278	39	140748564	180	265	0.953237	140748556	140748565	10	AAAAGAAGGTCCACAAGATG	1_-_69549	NM_001081226	-	'PA'	140748546	140748566	68	21	61	29	86	0.379888	0.291667	0.5	0.414286	0.423645
1	74334802	74334845	4880	43	74334825	3161	4834	0.990574	74334822	74334828	7	AAGACCCTTGAGTTGCTGTG	1_-_69660	NM_027154	-	'PA'	74334811	74334831	1580	455	916	454	1429	0.968137	0.974304	0.981779	0.986957	0.980782
1	34493499	34493540	581	41	34493523	304	568	0.977625	34493515	34493526	12	AAGTGTCACAGAGCTCTCAT	1_-_69668	NM_027159	-	'PA'	34493505	34493525	111	85	156	60	156	1	1	1	1	1
1	180886927	180886954	24	27	180886939	9	23	0.958333	180886938	180886946	9	AACTCTGGCCTCCATTTATT	1_-_69726	NM_027188	-	'3'UTR'	180885170	180887591	8	1	5	1	8	0.106667	0.0294118	0.0724638	0.0666667	0.166667
1	180887367	180887406	228	39	180887390	120	218	0.95614	180887382	180887391	10	AAAATGCCACTGGCGACTTG	1_-_69726	NM_027188	-	'3'UTR'	180885170	180887591	67	33	64	14	40	0.893333	0.970588	0.927536	0.933333	0.833333
1	95197775	95197823	464	48	95197807	290	451	0.971983	95197800	95197809	10	AAAATCCAGGGGGTGCAACC	1_-_69821	NM_178051	-	'3'UTR'	95195788	95198036	143	53	102	54	99	0.979452	0.929825	0.944444	0.915254	0.891892
1	95197859	95197885	31	26	95197872	22	30	0.967742	95197871	95197877	7	AGGGGTGCTTTGTTGTGGGT	1_-_69821	NM_178051	-	'3'UTR'	95195788	95198036	3	4	6	5	12	0.0205479	0.0701754	0.0555556	0.0847458	0.108108
1	64726419	64726461	686	42	64726443	510	656	0.956268	64726439	64726445	7	AAACAGTGCTACCTATGTGG	1_-_69941	NR_038009	-	'PA'	64726433	64726453	120	180	103	102	151	1	1	1	1	1
1	23373253	23373306	137	53	23373293	60	136	0.992701	23373264	23373293	30	AAAAACCTGTCATAGCCATG	1_-_70155	NM_001081079	-	'3'UTR'	23373263	23376587	44	23	11	19	39	0.431373	0.370968	0.180328	0.5	0.448276
1	23375400	23375430	87	30	23375415	63	83	0.954023	23375415	23375420	6	ATTGGTTGAAAGTTTTATTT	1_-_70155	NM_001081079	-	'3'UTR'	23373263	23376587	28	14	18	4	19	0.27451	0.225806	0.295082	0.105263	0.218391
1	23376358	23376415	137	57	23376383	52	131	0.956204	23376371	23376389	19	GATGTGTTTTCAAATTCTGT	1_-_70155	NM_001081079	-	'3'UTR'	23373263	23376587	30	25	32	15	29	0.294118	0.403226	0.52459	0.394737	0.333333
1	58491157	58491187	34	30	58491172	13	33	0.970588	58491168	58491178	11	AGTGCTGTCATCTCTTTCTT	1_-_70225	NM_027374	-	'exon'	58490631	58491293	11	1	8	2	11	0.126437	0.0185185	0.0824742	0.0540541	0.152778
1	58494942	58494977	48	35	58494965	35	46	0.958333	58494950	58494965	16	AGTGTTTGTACACTTGGTGA	1_-_70225	NM_001285827	-	'intron'	58491294	58495187	12	11	10	3	10	0.137931	0.203704	0.103093	0.0810811	0.138889
1	58487822	58487857	273	35	58487839	174	268	0.981685	58487838	58487845	8	ATGTGAGTGTCCTTTTTTTT	1_-_70225	NM_001285827	-	'PA'	58487827	58487847	64	42	79	32	51	0.735632	0.777778	0.814433	0.864865	0.708333
1	60047409	60047440	76	31	60047424	32	74	0.973684	60047422	60047429	8	AGCAGGATGTAAAATCCATT	1_-_70375	NM_027407	-	'3'UTR'	60045912	60047967	15	25	10	6	18	0.234375	0.367647	0.208333	0.285714	0.4
1	60047625	60047673	31	48	60047661	11	31	1	60047635	60047667	33	GCTCTGGTTTGGGGTTTTTC	1_-_70375	NM_027407	-	'3'UTR'	60045912	60047967	10	8	8	3	2	0.15625	0.117647	0.166667	0.142857	0.0444444
1	60045900	60045934	145	34	60045919	73	141	0.972414	60045914	60045921	8	AAAGCAATGTGTTCTCTAAA	1_-_70375	NM_027407	-	'PA'	60045902	60045922	39	35	30	12	25	0.609375	0.514706	0.625	0.571429	0.555556
1	53401445	53401505	1694	60	53401488	575	1644	0.970484	53401461	53401489	29	ACTGTGGGGTGTAGTAGTTT	1_-_70396	NM_001290984	-	'3'UTR'	53401461	53401573	418	174	350	169	533	0.985849	0.994286	0.97493	0.994118	0.992551
1	9713502	9713531	74	29	9713518	52	71	0.959459	9713515	9713519	5	AGATTGGTACTGCTCTTGTA	1_-_70675	NM_173443	-	'3'UTR'	9713278	9714562	21	11	13	7	19	0.0897436	0.117021	0.0577778	0.0522388	0.0688406
1	9714438	9714476	189	38	9714459	89	180	0.952381	9714454	9714464	11	AATTCAAAGATTATATCTTG	1_-_70675	NM_173443	-	'3'UTR'	9713278	9714562	58	16	42	23	41	0.247863	0.170213	0.186667	0.171642	0.148551
1	9710471	9710509	389	38	9710493	153	381	0.979434	9710487	9710495	9	ATCAATATTTTCAGGTTTGT	1_-_70675	NM_173443	-	'extend_3'TUR'	9708278	9713277	83	38	89	50	121	0.354701	0.404255	0.395556	0.373134	0.438406
1	9710600	9710639	185	39	9710620	110	182	0.983784	9710615	9710621	7	ATGTTATTTGCTTGTATCAA	1_-_70675	NM_173443	-	'extend_3'TUR'	9708278	9713277	35	20	51	35	41	0.149573	0.212766	0.226667	0.261194	0.148551
1	108620456	108620503	1954	47	108620478	1300	1917	0.981064	108620475	108620484	10	ATGACCTTCTTACTCTCAGA	1_-_70750	NM_027534	-	'3'UTR'	108616987	108621478	621	240	397	198	461	0.812827	0.816327	0.820248	0.821577	0.820285
1	58959295	58959343	290	48	58959321	136	276	0.951724	58959318	58959332	15	AGGTGCTTGCTTTGAAAGTG	1_-_70827	NM_172406	-	'3'UTR'	58957294	58960347	69	44	78	34	51	0.243816	0.435644	0.369668	0.4	0.31875
1	58957277	58957328	593	51	58957301	201	564	0.951096	58957293	58957302	10	AAATTGTCCTGTGTCTCCTT	1_-_70827	NM_172406	-	'PA'	58957284	58957304	214	57	133	51	109	0.756184	0.564356	0.630332	0.6	0.68125
1	164462242	164462272	105	30	164462258	93	102	0.971429	164462257	164462259	3	AACTTGCTTTTTTGTGGTCC	1_-_71449	NM_144877	-	'extend_3'TUR'	164458803	164463802	17	12	44	8	21	0.171717	0.184615	0.295302	0.32	0.25
1	164463787	164463821	331	34	164463805	281	320	0.966767	164463802	164463806	5	AAAGTTGGTTTATCTCAAGT	1_-_71449	NM_144877	-	'PA'	164463793	164463813	82	53	105	17	63	0.828283	0.815385	0.704698	0.68	0.75
1	168324982	168325018	324	36	168325004	118	310	0.95679	168324998	168325004	7	AAAGACAATAGGCTCTGGTG	1_-_71592	NM_001142948	-	'3'UTR'	168323742	168328830	78	31	59	48	94	0.917647	0.837838	0.819444	0.872727	0.895238
1	168323731	168323757	44	26	168323745	42	44	1	168323744	168323745	2	AAAATGTTTATTTGTCATGT	1_-_71592	NM_001142948	-	'PA'	168323732	168323752	7	6	13	7	11	0.0823529	0.162162	0.180556	0.127273	0.104762
1	44163711	44163753	908	42	44163732	745	883	0.972467	44163727	44163732	6	AAGGGTCTGTTTTGTTACAG	1_-_72050	NM_023645	-	'3'UTR'	44163391	44163931	224	139	203	89	228	1	1	1	1	1
1	13554841	13554887	2127	46	13554862	1515	2056	0.96662	13554859	13554862	4	ACAAGCTGTTTCCTGAACAA	1_-_72265	NM_028173	-	'3'UTR'	13554783	13556403	541	256	478	241	540	0.704427	0.690027	0.672293	0.690544	0.680958
1	13556280	13556316	444	36	13556300	348	422	0.95045	13556295	13556300	6	ATTTCTGCTGTTGTCCTGTT	1_-_72265	NM_028173	-	'3'UTR'	13554783	13556403	81	59	123	42	117	0.105469	0.15903	0.172996	0.120344	0.147541
1	13554760	13554799	414	39	13554783	283	408	0.985507	13554775	13554784	10	AAAAGATGAGTCTATTTTTT	1_-_72265	NM_028173	-	'PA'	13554773	13554793	123	40	81	53	111	0.160156	0.107817	0.113924	0.151862	0.139975
1	123202242	123202281	344	39	123202266	127	335	0.973837	123202255	123202267	13	ACATGAAAGATATGTTTATG	1_-_72999	NM_001271532	-	'3'UTR'	123200930	123202482	118	40	62	26	89	0.348083	0.268456	0.219081	0.185714	0.270517
1	123200913	123200950	938	37	123200934	436	905	0.964819	123200930	123200934	5	ACCATGTGTTAGTCCTTTTT	1_-_72999	NM_001271532	-	'PA'	123200920	123200940	221	109	221	114	240	0.651917	0.731544	0.780919	0.814286	0.729483
1	43105534	43105582	53	48	43105558	35	53	1	43105542	43105576	35	AATACTTGGGAAATTCAAAG	1_-_73122	NM_001013025	-	'3'UTR'	43104114	43106503	13	3	16	11	10	0.0977444	0.0652174	0.153846	0.275	0.0714286
1	43104094	43104130	431	36	43104114	318	410	0.951276	43104110	43104115	6	TGTCCTTTTCTTGGGTCATT	1_-_73122	NM_001013025	-	'PA'	43104104	43104124	120	43	88	29	130	0.902256	0.934783	0.846154	0.725	0.928571
1	185856895	185856928	88	33	185856915	19	85	0.965909	185856908	185856915	8	CGTGGCAGGTTCAGATGTCC	1_-_73363	NM_028516	-	'PA'	185856901	185856921	30	10	6	10	29	1	1	1	1	1
1	55228572	55228611	330	39	55228592	176	315	0.954545	55228591	55228598	8	ATTTTGCTACTACTATCTTC	1_-_74013	NM_028713	-	'3'UTR'	55227004	55228653	145	16	55	33	66	0.721393	0.5	0.696203	0.846154	0.702128
1	55226989	55227037	135	48	55227006	86	130	0.962963	55227003	55227028	26	AAATATGCCCATGTTTTGTT	1_-_74013	NM_028713	-	'PA'	55226994	55227014	56	16	24	6	28	0.278607	0.5	0.303797	0.153846	0.297872
1	157695643	157695675	84	32	157695662	54	84	1	157695656	157695663	8	AACATGAGTCCTGGGCCTTT	1_-_74081	NM_001039184	-	'3'UTR'	157692094	157695692	27	11	17	13	16	0.184932	0.134146	0.175258	0.325	0.137931
1	157692077	157692112	416	35	157692096	354	397	0.954327	157692090	157692096	7	AATTCCATGTCCGGTGTAAA	1_-_74081	NM_001039184	-	'PA'	157692084	157692104	119	71	80	27	100	0.815068	0.865854	0.824742	0.675	0.862069
1	155350129	155350156	24	27	155350146	11	23	0.958333	155350143	155350146	4	AGCACTTATTGTCTTAATCT	1_-_74091	NM_028749	-	'PA'	155350136	155350156	2	4	6	3	8	1	1	1	1	1
1	75168273	75168308	360	35	75168291	266	353	0.980556	75168289	75168295	7	ACGGCTGTGGTTTGGTTGTG	1_-_74104	NM_023732	-	'3'UTR'	75168215	75168453	76	52	107	31	87	1	1	1	1	1
1	167259617	167259704	1030	87	167259644	211	996	0.96699	167259634	167259689	56	AAGATATCCTAAATTTGACT	1_-_74106	NM_028759	-	'3'UTR'	167259632	167260069	250	79	213	144	310	0.922509	0.9875	0.972603	0.986301	0.965732
1	127289798	127289845	1728	47	127289820	1415	1663	0.962384	127289817	127289820	4	ACTACTTGTTTCAGGCTCTT	1_-_74117	NM_001205386	-	'3'UTR'	127289482	127290571	424	274	403	205	357	0.210526	0.170186	0.169756	0.183199	0.188789
1	127289463	127289511	7605	48	127289486	2524	7296	0.959369	127289483	127289490	8	CTTCCTGATGGTTTTTCTTC	1_-_74117	NM_001205386	-	'PA'	127289472	127289492	1580	1330	1950	911	1525	0.784508	0.826087	0.821398	0.81412	0.806452
1	75471129	75471173	1126	44	75471151	758	1094	0.971581	75471146	75471152	7	AGAATAATGAGTGGAAACTG	1_-_74241	NM_001001565	-	'PA'	75471134	75471154	405	103	171	78	337	1	1	1	1	1
1	75195894	75195937	101	43	75195923	30	96	0.950495	75195905	75195925	21	AGTACTGGCTCCACACACCT	1_-_74577	NM_029010	-	'3'UTR'	75194810	75196068	26	6	15	6	43	0.42623	0.222222	0.319149	0.428571	0.421569
1	75193538	75193563	23	25	75193550	12	23	1	75193549	75193555	7	AAAACAGCCTGGTGTAGAGG	1_-_74577	NM_029010	-	'extend_3'TUR'	75189810	75194809	3	5	5	0	10	0.0491803	0.185185	0.106383	0	0.0980392
1	75194098	75194129	58	31	75194116	24	58	1	75194110	75194121	12	ATCCTGACATGAAGTGTTTT	1_-_74577	NM_029010	-	'extend_3'TUR'	75189810	75194809	16	7	6	5	24	0.262295	0.259259	0.12766	0.357143	0.235294
1	75194799	75194831	75	32	75194818	48	74	0.986667	75194811	75194818	8	AAGTTCAACTTGCTTCCTGT	1_-_74577	NM_029010	-	'PA'	75194800	75194820	16	9	21	3	25	0.262295	0.333333	0.446809	0.214286	0.245098
1	75013911	75013942	101	31	75013926	37	98	0.970297	75013926	75013930	5	ACTGTTGAGGTTACCTGTGA	1_-_75570	NM_029342	-	'PA'	75013910	75013930	26	16	23	14	19	1	1	1	1	1
1	44143633	44143722	71	89	44143687	27	69	0.971831	44143643	44143712	70	ATAAAGTATACCTCTCACTC	1_-_75623	NM_029368	-	'3'UTR'	44143462	44143734	10	21	19	11	8	0.178571	0.106599	0.137681	0.177419	0.1
1	44143442	44143477	483	35	44143460	303	464	0.960663	44143458	44143462	5	AATGGTGCCTTTGTTTTACT	1_-_75623	NM_029368	-	'PA'	44143452	44143472	46	176	119	51	72	0.821429	0.893401	0.862319	0.822581	0.9
1	37477081	37477185	256	104	37477171	126	245	0.957031	37477107	37477171	65	AAGGATGACTCTTCGATCAG	1_-_76178	NM_198006	-	'3'UTR'	37473930	37477430	71	48	50	26	50	0.147303	0.188235	0.117647	0.128713	0.0986193
1	37473914	37473969	1686	55	37473937	1094	1626	0.964413	37473931	37473938	8	AAAACATCTTTGTTCTGTTT	1_-_76178	NM_198006	-	'PA'	37473920	37473940	411	207	375	176	457	0.852697	0.811765	0.882353	0.871287	0.901381
1	193361355	193361391	124	36	193361372	61	119	0.959677	193361371	193361380	10	AAATGTTTAAGATGGCTTGG	1_-_76843	NM_029766	-	'3'UTR'	193361244	193363121	8	49	31	12	19	0.266667	0.326667	0.378049	0.363636	0.271429
1	193361227	193361271	257	44	193361245	189	246	0.957198	193361243	193361246	4	GCCTTTGTGGAAGAGTGTGT	1_-_76843	NM_029766	-	'PA'	193361234	193361254	22	101	51	21	51	0.733333	0.673333	0.621951	0.636364	0.728571
1	74612990	74613032	78	42	74613016	28	76	0.974359	74612999	74613021	23	ACTTGTTTGGATCCCTGTCC	1_-_77264	NM_029888	-	'3'UTR'	74611702	74613451	13	17	16	7	23	0.191176	0.435897	0.262295	0.304348	0.323944
1	74613061	74613092	42	31	74613076	23	41	0.97619	74613071	74613083	13	ATGTGTCCTTGTGTCTAGTG	1_-_77264	NM_029888	-	'3'UTR'	74611702	74613451	13	4	13	4	7	0.191176	0.102564	0.213115	0.173913	0.0985915
1	74613231	74613275	119	44	74613261	99	115	0.966387	74613253	74613262	10	AAAACACTGACTTCTTGAGT	1_-_77264	NM_029888	-	'3'UTR'	74611702	74613451	35	13	22	11	34	0.514706	0.333333	0.360656	0.478261	0.478873
1	74611689	74611714	30	25	74611702	25	30	1	74611702	74611704	3	ATTTCCTGCTATAATCCTTT	1_-_77264	NM_029888	-	'PA'	74611692	74611712	7	5	10	1	7	0.102941	0.128205	0.163934	0.0434783	0.0985915
1	60540472	60540510	106	38	60540491	20	101	0.95283	60540483	60540499	17	ATATATTCATTCAGTACTAC	1_-_77300	NM_001045513	-	'3'UTR'	60540029	60545143	20	7	33	21	20	0.0881057	0.04	0.115789	0.145833	0.0645161
1	60544137	60544221	114	84	60544188	39	111	0.973684	60544149	60544201	53	AATTTGGTTCATCATTATAA	1_-_77300	NM_001045513	-	'3'UTR'	60540029	60545143	15	15	45	19	17	0.0660793	0.0857143	0.157895	0.131944	0.0548387
1	60540012	60540056	884	44	60540031	760	863	0.976244	60540030	60540035	6	AACCTGGTTTTAAAGCTTGT	1_-_77300	NM_001045513	-	'PA'	60540019	60540039	175	143	189	100	256	0.770925	0.817143	0.663158	0.694444	0.825806
1	137267615	137267657	1361	42	137267637	860	1315	0.966201	137267632	137267642	11	AAACTATGAGTCCGTCCTTC	1_-_77552	NM_175259	-	'extend_3'TUR'	137263033	137268032	488	105	160	103	459	0.715543	0.744681	0.733945	0.691275	0.742718
1	137268013	137268053	451	40	137268034	232	438	0.971175	137268026	137268039	14	ATCAGTGGAATCACTGGCCC	1_-_77552	NM_175259	-	'PA'	137268023	137268043	163	32	56	40	147	0.239003	0.22695	0.256881	0.268456	0.237864
1	158738240	158738271	23	31	158738258	9	22	0.956522	158738251	158738263	13	AAAATATAAAACCTTTTCTT	1_-_78255	NM_001159968	-	'3'UTR'	158734297	158739294	11	5	2	1	3	0.458333	0.454545	0.25	0.333333	0.3
1	158738947	158738973	35	26	158738961	24	34	0.971429	158738960	158738962	3	ATTTCTTTTAACTTTGTACT	1_-_78255	NM_001159968	-	'3'UTR'	158734297	158739294	13	6	6	2	7	0.541667	0.545455	0.75	0.666667	0.7
1	36587021	36587050	44	29	36587039	24	42	0.954545	36587034	36587039	6	ACCTCAGCCTGGTTGCCTCA	1_-_78321	NM_153502	-	'extend_3'TUR'	36582379	36587378	10	4	6	4	18	1	1	1	1	1
1	169153001	169153051	1349	50	169153032	674	1283	0.951075	169153022	169153038	17	AATGAATTCAACTCTTCACT	1_-_80914	NM_030724	-	'extend_3'TUR'	169151217	169156216	272	189	359	150	313	0.388017	0.405579	0.477394	0.390625	0.490596
1	169156172	169156238	1706	66	169156219	824	1628	0.954279	169156204	169156224	21	AAAAAGAAAGGATCTATTTT	1_-_80914	NM_030724	-	'PA'	169156207	169156227	422	270	382	229	325	0.601997	0.579399	0.507979	0.596354	0.509404
1	172804301	172804336	789	35	172804320	610	774	0.980989	172804318	172804320	3	AGGTCCTGTGTTAGATGGTT	1_-_80915	NM_023173	-	'PA'	172804309	172804329	185	117	190	85	197	1	1	1	1	1
1	55043848	55043895	6126	47	55043869	2582	5960	0.972902	55043868	55043877	10	AATTTGTGTGTGTTTTTTGA	1_-_81898	NM_031179	-	'3'UTR'	55042013	55044177	1851	683	1259	660	1507	0.980403	0.931787	0.953066	0.942857	0.943644
1	173931077	173931103	34	26	173931092	27	33	0.970588	173931089	173931092	4	AGTGGGGGTTTTCTGTTGCT	1_-_93840	NM_033509	-	'extend_3'TUR'	173929502	173934501	4	7	8	5	9	0.148148	0.466667	0.333333	0.416667	0.36
1	173934482	173934516	73	34	173934503	49	70	0.958904	173934492	173934503	12	ACCTGGGAACCACCCTGCCC	1_-_93840	NM_033509	-	'PA'	173934492	173934512	23	8	16	7	16	0.851852	0.533333	0.666667	0.583333	0.64
1	152296932	152297035	478	103	152296999	190	464	0.970711	152296947	152297018	72	AAAACAGTTCTCAACTTGAC	1_-_96875	NM_001110146	-	'3'UTR'	152296542	152297113	165	37	4	24	234	1	1	1	1	1
1	38043934	38043971	314	37	38043956	209	308	0.980892	38043947	38043957	11	AACATAAGGAACTCCATTGG	1_-_98258	NM_172054	-	'3'UTR'	38040712	38044506	91	39	72	24	82	0.106808	0.0702703	0.0730964	0.0564706	0.088172
1	38044220	38044327	3343	107	38044239	613	3197	0.956327	38044239	38044310	72	ATTCACATGTCTGTTTTTAA	1_-_98258	NM_172054	-	'3'UTR'	38040712	38044506	709	477	855	362	794	0.83216	0.859459	0.86802	0.851765	0.853763
1	53812385	53812431	71	46	53812413	22	70	0.985915	53812396	53812421	26	AAATTTACAAATTTCCCATG	1_-_98267	NM_133810	-	'3'UTR'	53812356	53814331	19	10	8	11	22	0.0565476	0.0763359	0.0430108	0.0774648	0.0805861
1	53812928	53812971	732	43	53812950	243	712	0.972678	53812945	53812956	12	ATGTTAGATATTCTTTCCTT	1_-_98267	NM_133810	-	'3'UTR'	53812356	53814331	230	84	135	86	177	0.684524	0.641221	0.725806	0.605634	0.648352
1	53813022	53813080	79	58	53813050	38	77	0.974684	53813050	53813070	21	AAAAGTTGTTTGCCTTTTGT	1_-_98267	NM_133810	-	'3'UTR'	53812356	53814331	22	15	11	9	20	0.0654762	0.114504	0.0591398	0.0633803	0.0732601
1	53812337	53812374	216	37	53812358	91	209	0.967593	53812352	53812362	11	AATCTGAAGCTGCCTTAAGT	1_-_98267	NM_133810	-	'PA'	53812346	53812366	65	22	32	36	54	0.193452	0.167939	0.172043	0.253521	0.197802
1	23873093	23873149	4534	56	23873129	3300	4314	0.951478	23873127	23873133	7	GGAAAAAAAAAAGGACGAGA	1_-_98366	NM_001290683	-	'exon'	23873056	23873136	1612	489	694	413	1106	0.558946	0.571262	0.463284	0.528809	0.542955
1	23883194	23883232	892	38	23883213	696	892	1	23883213	23883217	5	GTAAGTAAAACCTTCATCTT	1_-_98366	NM_001290683	-	'exon'	23883213	23883288	407	71	162	77	175	0.141123	0.0829439	0.108144	0.0985915	0.0859107
1	23852446	23852486	2755	40	23852467	1505	2667	0.968058	23852464	23852469	6	ACACCTTTTTATTTGTGGGT	1_-_98366	NM_001290683	-	'PA'	23852454	23852474	785	282	610	281	709	0.272191	0.329439	0.40721	0.359795	0.348061
1	165315020	165315068	770	48	165315040	547	743	0.964935	165315035	165315041	7	ACAGTATGGTCTGTCATTTA	1_-_98376	NM_178883	-	'PA'	165315030	165315050	173	124	136	92	218	1	1	1	1	1
1	183745428	183745499	926	71	183745447	312	888	0.958963	183745446	183745483	38	ATTTCTTTGCCACAGCTTTG	1_-_98386	NM_133815	-	'PA'	183745436	183745456	160	199	255	124	150	1	1	1	1	1
1	38920704	38920734	89	30	38920720	53	89	1	38920716	38920722	7	AAACAAAAGTGTATCTGGGT	1_-_98388	NM_145142	-	'PA'	38920708	38920728	40	5	10	10	24	1	1	1	1	1
1	33818571	33818609	113	38	33818596	77	109	0.964602	33818583	33818596	14	AGTTTTTTTCCAGAAATTCT	1_-_98403	NM_001290699	-	'3'UTR'	33818386	33819007	24	15	26	14	30	0.0872727	0.0920245	0.121495	0.121739	0.127119
1	33848965	33849002	452	37	33848985	307	430	0.951327	33848984	33848987	4	AAAACTTGCTGCCTTTCTTT	1_-_98403	NM_001290699	-	'intron'	33840037	33862183	123	87	91	41	88	0.447273	0.533742	0.425234	0.356522	0.372881
1	33818372	33818410	462	38	33818392	376	440	0.952381	33818389	33818392	4	AACTAAGAGGAAATTTTTTC	1_-_98403	NM_001290699	-	'PA'	33818376	33818396	124	60	93	54	109	0.450909	0.368098	0.434579	0.469565	0.461864
1	54452829	54452866	807	37	54452849	661	780	0.966543	54452846	54452850	5	ACATTTCACCTTTTAAACTT	1_-_98488	NM_001033194	-	'extend_3'TUR'	54449425	54454424	181	136	168	87	208	0.635088	0.751381	0.641221	0.664122	0.679739
1	54454404	54454441	393	37	54454424	240	385	0.979644	54454418	54454426	9	AAATGGACAATATTGCCTTC	1_-_98488	NM_001033194	-	'PA'	54454415	54454435	104	45	94	44	98	0.364912	0.248619	0.358779	0.335878	0.320261
1	174204082	174204123	3130	41	174204103	2991	2991	0.955591	174204103	174204103	1	GAAAGAAAGACCACAGGTTT	1_-_98660	NM_178405	-	'3'UTR'	174201840	174204831	1182	382	387	591	449	1	1	1	1	1
1	52713119	52713167	198	48	52713151	127	189	0.954545	52713144	52713155	12	AAACTTGATTTGAGAATTTT	1_-_98682	NM_133829	-	'PA'	52713138	52713158	58	16	46	21	48	1	1	1	1	1
1	75487098	75487129	117	31	75487114	73	113	0.965812	75487113	75487116	4	AAAAACTCTCTGTATTTATT	1_-_98733	NM_178884	-	'intron'	75486325	75487370	24	22	19	5	43	0.266667	0.372881	0.279412	0.277778	0.494253
1	75492893	75492933	179	40	75492915	60	171	0.955307	75492905	75492919	15	AAACCTCATGGTAAATAAGT	1_-_98733	NM_178884	-	'intron'	75490633	75493582	52	33	42	13	31	0.577778	0.559322	0.617647	0.722222	0.356322
1	75482387	75482414	38	27	75482401	25	38	1	75482399	75482407	9	ACACCTGTCTGTGTGCCACG	1_-_98733	NM_178884	-	'PA'	75482390	75482410	14	4	7	0	13	0.155556	0.0677966	0.102941	0	0.149425
1	193974884	193974920	149	36	193974903	80	143	0.959732	193974897	193974908	12	AAACTAAGACAACATTGAAA	1_+_100038712	NR_033536	+	'PA'	193974897	193974917	48	7	17	15	56	1	1	1	1	1
1	168246938	168246982	128	44	168246953	50	123	0.960938	168246952	168246964	13	ACTTTTGTTATAAAGAACTC	1_+_100039795	NM_001164528	+	'PA'	168246953	168246973	27	15	54	6	21	1	1	1	1	1
1	138587363	138587395	100	32	138587382	47	95	0.95	138587375	138587382	8	CCTTTCTTGCTTTGTTTCTC	1_+_100503460	NR_045325	+	'PA'	138587372	138587392	40	13	11	7	24	1	1	1	1	1
1	58712661	58712696	51	35	58712675	40	49	0.960784	58712673	58712677	5	TTTCTGTGCAGTATCTAATT	1_+_100504501	NR_045007	+	'PA'	58712665	58712685	21	5	8	5	10	1	1	1	1	1
1	74784450	74784476	37	26	74784464	30	36	0.972973	74784464	74784466	3	AAGTTTTTGGGGGGGTCTTT	1_+_104086	NM_024264	+	'PA'	74784454	74784474	9	1	2	7	17	1	1	1	1	1
1	187252202	187252253	3963	51	187252233	2198	3785	0.955085	187252226	187252235	10	ATTTTATCTATTTGGTTCAT	1_+_107508	NM_029735	+	'PA'	187252224	187252244	885	439	952	475	1034	0.947537	0.982103	0.937931	0.94246	0.934056
1	40424379	40424434	506	55	40424396	271	491	0.970356	40424396	40424419	24	AAAACATGAAAGCTCTTTTG	1_+_107527	NM_133193	+	'extend_3'TUR'	40422317	40427316	107	71	123	69	121	1	1	1	1	1
1	37955160	37955221	2575	61	37955182	1359	2459	0.954951	37955178	37955188	11	ATCTCCGCTGATGGAGTCCT	1_+_107734	NM_027098	+	'PA'	37955168	37955188	620	280	728	259	572	0.992	0.996441	0.991826	0.977358	0.991334
1	129383793	129383832	383	39	129383813	243	365	0.953003	129383806	129383820	15	ACTCCGTGAATTAGAGTTTA	1_+_107895	NM_145128	+	'extend_3'TUR'	129379550	129384549	109	45	58	55	98	1	1	1	1	1
1	71626188	71626221	117	33	71626204	82	112	0.957265	71626203	71626210	8	AGTTGTTTCTGTGCTGGCTG	1_+_108147	NM_026195	+	'extend_3'TUR'	71625978	71630977	29	26	25	13	19	0.103943	0.302326	0.179856	0.206349	0.0989583
1	71625959	71626000	643	41	71625978	303	615	0.956454	71625976	71625981	6	TGGGTTTGTGGTTACTTTTG	1_+_108147	NM_026195	+	'PA'	71625967	71625987	236	56	109	45	169	0.845878	0.651163	0.784173	0.714286	0.880208
1	94817131	94817171	757	40	94817149	406	747	0.98679	94817148	94817156	9	AGATCTGACCTCCCTTCCTG	1_+_108657	NM_181405	+	'3'UTR'	94816433	94817162	208	77	203	84	175	0.920354	0.974684	0.944186	0.965517	0.94086
1	5152507	5152551	1385	44	5152526	972	1334	0.963177	5152525	5152530	6	AAACATGTTCTTAAATTTTG	1_+_108664	NM_133826	+	'3'UTR'	5152247	5152630	381	140	368	153	292	0.911483	0.838323	0.874109	0.9	0.851312
1	5152575	5152640	138	65	5152591	33	138	1	5152587	5152630	44	AAAAATTGGGAGAAGTGTTC	1_+_108664	NM_133826	+	'3'UTR'	5152247	5152630	31	18	39	11	39	0.0741627	0.107784	0.0926366	0.0647059	0.113703
1	92509662	92509720	2652	58	92509687	1032	2545	0.959653	92509680	92509699	20	AAACTTTCATCTAAAGCTGG	1_+_108679	NM_133805	+	'3'UTR'	92508829	92509916	523	401	731	324	566	0.903282	0.873638	0.920655	0.887671	0.851128
1	92509894	92509940	330	46	92509915	195	317	0.960606	92509908	92509916	9	ACTTTGTAGTGGGTTACCTA	1_+_108679	NM_133805	+	'PA'	92509906	92509926	56	58	63	41	99	0.0967185	0.126362	0.0793451	0.112329	0.148872
1	133435590	133435625	122	35	133435611	80	119	0.97541	133435603	133435612	10	AGTGGAACGTTTACTGTTTT	1_+_108900	NM_175382	+	'3'UTR'	133435507	133436449	21	34	21	13	30	1	1	1	1	1
1	135036336	135036388	1721	52	135036357	1130	1637	0.951191	135036353	135036365	13	AAATGCTATGTGACTTTATG	1_+_108954	NM_133819	+	'3'UTR'	135033465	135036377	402	251	359	225	400	0.866379	0.893238	0.838785	0.910931	0.87146
1	152287424	152287461	882	37	152287443	649	844	0.956916	152287442	152287446	5	AAGTTTTGTTTGTTTGGCTT	1_+_108989	NM_133780	+	'intron'	152287329	152287568	264	110	155	105	210	0.132931	0.127021	0.107415	0.126659	0.12844
1	152297032	152297083	5464	51	152297057	3937	5334	0.976208	152297057	152297064	8	AAAAAGTATCACTGTTTTCT	1_+_108989	NM_133780	+	'PA'	152297055	152297075	1441	713	1196	674	1310	0.725579	0.823326	0.828829	0.813028	0.801223
1	181616926	181616978	403	52	181616957	196	386	0.957816	181616944	181616964	21	AAACTTCATATCTCAGCTGT	1_+_109232	NM_178653	+	'3'UTR'	181616809	181617315	128	43	95	26	94	0.295612	0.255952	0.325342	0.181818	0.26257
1	181617297	181617335	1047	38	181617317	384	1008	0.962751	181617315	181617319	5	TGACTTTTTCCCCCTTTTTT	1_+_109232	NM_178653	+	'PA'	181617305	181617325	305	125	197	117	264	0.704388	0.744048	0.674658	0.818182	0.73743
1	11060473	11060508	177	35	11060489	75	169	0.954802	11060488	11060498	11	AACATAGTGGAGCATGTGTC	1_+_109294	NM_029525	+	'intron'	11058197	11070103	47	19	29	24	50	0.886792	0.826087	0.828571	0.857143	1
1	11293749	11293774	21	25	11293762	11	20	0.952381	11293758	11293765	8	AGCTTAAGTTTGACTAATTC	1_+_109294	NM_001033636	+	'PA'	11293753	11293773	6	4	6	4	0	0.113208	0.173913	0.171429	0.142857	0
1	158579676	158579715	724	39	158579695	495	691	0.95442	158579695	158579699	5	ACAAGGTTTGCAAGTTGTGT	1_+_11352	NM_009595	+	'3'UTR'	158572848	158579750	153	94	213	100	131	0.642857	0.671429	0.777372	0.714286	0.671795
1	158490448	158490485	46	37	158490460	13	44	0.956522	158490460	158490475	16	AAGAAGAAGAAGAAGAAGAA	1_+_11352	NM_009595	+	'intron'	158489337	158550969	31	5	1	5	2	0.130252	0.0357143	0.00364964	0.0357143	0.0102564
1	158579733	158579765	239	32	158579750	200	230	0.962343	158579749	158579751	3	AAAGTGGGCTTGAGTTGGAG	1_+_11352	NM_009595	+	'PA'	158579740	158579760	48	39	55	33	55	0.201681	0.278571	0.20073	0.235714	0.282051
1	39428180	39428243	24536	63	39428210	7372	23488	0.957287	39428209	39428216	8	CTTCAGGGTTTGGTTTTCCT	1_+_114641	NM_001252219	+	'3'UTR'	39428179	39428755	17509	7295	16106	6240	16003	0.98332	0.982889	0.983993	0.977291	0.981177
1	166195476	166195527	1586	51	166195497	1305	1510	0.952081	166195494	166195498	5	AAATTTTCCCTTTTCACTCA	1_+_116914	NM_001276455	+	'3'UTR'	166193650	166195516	333	241	360	183	393	1	1	1	1	1
1	153211365	153211415	2052	50	153211388	1365	2023	0.985867	153211383	153211400	18	ACCCCTTTTCAGAAGTGTTT	1_+_117198	NM_054102	+	'3'UTR'	153210496	153211575	521	379	478	240	405	0.760584	0.75498	0.74571	0.745342	0.744485
1	153211527	153211586	384	59	153211545	312	378	0.984375	153211544	153211574	31	AAATCCTTGCACTGTGGGAT	1_+_117198	NM_054102	+	'3'UTR'	153210496	153211575	94	70	87	44	83	0.137226	0.139442	0.135725	0.136646	0.152574
1	58163238	58163273	80	35	58163254	68	76	0.95	58163253	58163262	10	AAATCGTTTGCTCTAAGGTG	1_+_11761	NM_009676	+	'PA'	58163244	58163264	23	7	8	10	28	1	1	1	1	1
1	75401120	75401155	493	35	75401138	394	476	0.965517	75401138	75401140	3	AGCTAGTGTGCTGTGTCTTC	1_+_11790	NM_001173477	+	'PA'	75401130	75401150	149	52	118	35	122	1	1	1	1	1
1	173156486	173156520	100	34	173156501	53	96	0.96	173156501	173156508	8	AAACTTCATGCCTCTTGTGT	1_+_11807	NM_013474	+	'PA'	173156500	173156520	42	2	17	4	31	1	1	1	1	1
1	59932683	59932721	543	38	59932702	393	529	0.974217	59932699	59932708	10	AAATTTTTCGATGTTGTTTT	1_+_12168	NM_007561	+	'3'UTR'	59927330	59934925	164	76	107	40	142	0.135202	0.184019	0.173701	0.123077	0.156733
1	59934217	59934259	282	42	59934233	122	272	0.964539	59934233	59934246	14	CTTTTGTATTATCTATGGAT	1_+_12168	NM_007561	+	'3'UTR'	59927330	59934925	89	32	52	31	68	0.0733718	0.0774818	0.0844156	0.0953846	0.0750552
1	59934436	59934476	2369	40	59934456	1563	2301	0.971296	59934454	59934460	7	AACAGTAAGTGTATTTTTGA	1_+_12168	NM_007561	+	'3'UTR'	59927330	59934925	812	259	395	222	613	0.669415	0.627119	0.641234	0.683077	0.6766
1	87746281	87746315	376	34	87746299	267	359	0.954787	87746297	87746301	5	AGCAACTTGTCAAGTGTGGA	1_+_12283	NM_133781	+	'3'UTR'	87745797	87748152	104	45	76	52	82	0.136304	0.0706436	0.091018	0.115044	0.1025
1	87748123	87748170	3025	47	87748149	912	2954	0.976529	87748143	87748153	11	TGTCTTGTGATGTCCTTTAG	1_+_12283	NM_133781	+	'PA'	87748142	87748162	607	565	723	376	683	0.795544	0.88697	0.865868	0.831858	0.85375
1	141390445	141390484	56	39	141390459	32	56	1	141390458	141390476	19	ACTAAAACTGTTTAATGAAT	1_+_12316	NM_009791	+	'3'UTR'	141390328	141390665	9	20	9	10	8	0.310345	0.235294	0.128571	0.285714	0.333333
1	141390644	141390681	196	37	141390667	94	187	0.954082	141390658	141390667	10	ACTTGTGTGTGTGTGTGGTT	1_+_12316	NM_009791	+	'PA'	141390655	141390675	20	65	61	25	16	0.689655	0.764706	0.871429	0.714286	0.666667
1	58903833	58903873	851	40	58903851	347	814	0.956522	58903848	58903857	10	ACTTGTATGTATGTTTTGTT	1_+_12370	NM_009812	+	'3'UTR'	58903599	58904347	185	156	210	104	159	0.876777	0.957055	0.933333	0.945455	0.888268
1	58904332	58904361	76	29	58904347	52	74	0.973684	58904346	58904351	6	ATATAATTCTTCCAGGTTAG	1_+_12370	NM_009812	+	'PA'	58904337	58904357	26	7	15	6	20	0.123223	0.0429448	0.0666667	0.0545455	0.111732
1	6264406	6264445	684	39	6264428	499	654	0.95614	6264422	6264430	9	AGCTGGCCATTGTTGGGTTT	1_+_12421	NM_009826	+	'3'UTR'	6264357	6266185	156	75	190	73	160	0.175676	0.154004	0.195272	0.185751	0.204866
1	6264554	6264598	1004	44	6264577	336	974	0.97012	6264570	6264582	13	AATCAAAATGGTTTTGTTTT	1_+_12421	NM_009826	+	'3'UTR'	6264357	6266185	205	146	288	125	210	0.230856	0.299795	0.295992	0.318066	0.268886
1	6265225	6265264	1025	39	6265246	790	980	0.956098	6265245	6265249	5	AAATGTGTGTGCCTTTTAAA	1_+_12421	NM_009826	+	'3'UTR'	6264357	6266185	321	112	232	96	219	0.361486	0.229979	0.238438	0.244275	0.28041
1	6265606	6265681	437	75	6265658	227	417	0.954233	6265655	6265667	13	ATGTTTCTATTCAGTCCTTC	1_+_12421	NM_009826	+	'3'UTR'	6264357	6266185	44	69	146	54	104	0.0495495	0.141684	0.150051	0.137405	0.133163
1	196787427	196787499	538	72	196787472	99	512	0.951673	196787441	196787477	37	ATTTGATGTGGCCCTATAAT	1_+_12490	NM_001111059	+	'3'UTR'	196785989	196787486	65	12	128	74	233	1	1	1	1	1
1	58814085	58814189	1736	104	58814104	679	1691	0.974078	58814103	58814170	68	ACTCCCTCTTCTGGAGTGTC	1_+_12633	NM_001289704	+	'3'UTR'	58810767	58816047	778	166	234	146	367	0.778	0.557047	0.641096	0.646018	0.638261
1	58815706	58815743	465	37	58815724	376	458	0.984946	58815724	58815731	8	AAAATGGTCTGATGTCTTTG	1_+_12633	NM_001289704	+	'3'UTR'	58810767	58816047	134	73	71	42	138	0.134	0.244966	0.194521	0.185841	0.24
1	58770716	58770749	150	33	58770732	75	146	0.973333	58770730	58770737	8	ACTCAAATGCCTCCTTGTTA	1_+_12633	NM_009805	+	'intron'	58770504	58783149	48	19	34	15	30	0.048	0.0637584	0.0931507	0.0663717	0.0521739
1	92112277	92112314	686	37	92112295	575	656	0.956268	92112294	92112296	3	AAAACCTCATGTGTGCTTTG	1_+_12778	NM_007722	+	'PA'	92112287	92112307	103	56	105	99	293	1	1	1	1	1
1	45405695	45405885	16370	190	45405863	7950	15747	0.961943	45405766	45405868	103	AACACTGTGTTACATTCTTT	1_+_12825	NM_009930	+	'3'UTR'	45405593	45406551	16601	1599	4590	4334	19146	0.961318	0.958633	0.948935	0.952527	0.954865
1	174052432	174052477	5954	45	174052455	2998	5714	0.959691	174052453	174052459	7	AGCCTCCTGCTTGCCGTTTC	1_+_12847	NM_009938	+	'PA'	174052453	174052473	1641	609	1296	716	1452	0.979117	0.982258	0.972243	0.987586	0.983074
1	36750197	36750263	8909	66	36750230	3596	8470	0.950724	36750223	36750237	15	ATAGCTGGCTAGTCTTATGT	1_+_12859	NM_009942	+	'PA'	36750223	36750243	2268	948	2102	959	2193	0.989529	0.993711	0.992446	0.992754	0.992308
1	64644486	64644523	112	37	64644508	46	109	0.973214	64644504	64644510	7	ATATTAGTGTGGTGTTGGGA	1_+_12912	NM_001037726	+	'3'UTR'	64643953	64651122	32	19	28	14	16	0.176796	0.159664	0.173913	0.170732	0.0930233
1	64644831	64644865	123	34	64644851	62	117	0.95122	64644843	64644851	9	AATCCTCATACTGTCACTCA	1_+_12912	NM_001037726	+	'3'UTR'	64643953	64651122	26	21	37	12	21	0.143646	0.176471	0.229814	0.146341	0.122093
1	64648039	64648073	64	34	64648056	34	61	0.953125	64648055	64648064	10	ACAACTAGAGTTTTGGGTGG	1_+_12912	NM_001037726	+	'3'UTR'	64643953	64651122	17	8	14	9	13	0.0939227	0.0672269	0.0869565	0.109756	0.0755814
1	64648888	64648934	88	46	64648919	25	84	0.954545	64648899	64648923	25	AACATTTTTCTGTGTGTGTA	1_+_12912	NM_001037726	+	'3'UTR'	64643953	64651122	26	16	8	14	20	0.143646	0.134454	0.0496894	0.170732	0.116279
1	64649414	64649444	81	30	64649431	67	77	0.950617	64649429	64649436	8	AAATATTGTCTTAAAGTGCT	1_+_12912	NM_001037726	+	'3'UTR'	64643953	64651122	16	11	14	10	26	0.0883978	0.092437	0.0869565	0.121951	0.151163
1	64649523	64649559	244	36	64649544	182	237	0.971311	64649536	64649545	10	TGTAAAGTCTCTTTTTTGGG	1_+_12912	NM_001037726	+	'3'UTR'	64643953	64651122	57	41	55	19	65	0.314917	0.344538	0.341615	0.231707	0.377907
1	137648786	137648826	3672	40	137648807	2707	3510	0.955882	137648805	137648808	4	AACTCTGCTTTCCTGTCTGT	1_+_13007	NM_007791	+	'PA'	137648796	137648816	2176	255	294	153	632	1	1	1	1	1
1	133548098	133548139	1506	41	133548122	724	1497	0.994024	133548116	133548122	7	GAATCGTGGACTCGCTGATC	1_+_13034	NM_007799	+	'intron'	133535135	133558452	351	99	377	169	501	1	1	1	1	1
1	93744298	93744350	282	52	93744325	151	272	0.964539	93744317	93744336	20	AGAACCTGTTTAAACTGGAC	1_+_13345	NM_007855	+	'3'UTR'	93698687	93744604	60	53	60	31	68	0.229008	0.236607	0.211268	0.242188	0.266667
1	93744584	93744622	900	38	93744605	365	881	0.978889	93744601	93744606	6	CCGCGTGTCCCCTCTGTCCT	1_+_13345	NM_007855	+	'PA'	93744594	93744614	202	171	224	97	187	0.770992	0.763393	0.788732	0.757812	0.733333
1	75364272	75364310	361	38	75364288	130	348	0.963989	75364288	75364297	10	AAACCTGCATGGCCCTGTCA	1_+_13346	NM_010043	+	'3'UTR'	75363626	75365154	38	51	115	43	101	1	1	1	1	1
1	182868515	182868546	164	31	182868531	149	158	0.963415	182868530	182868532	3	AGCTTTTTTGTTTCCTTATT	1_+_13590	NM_010094	+	'PA'	182868522	182868542	43	9	21	13	72	1	1	1	1	1
1	133922089	133922121	30	32	133922103	8	29	0.966667	133922099	133922112	14	AAAGGAGAAAAGCCATTGGT	1_+_13714	NM_007923	+	'3'UTR'	133920229	133922261	12	5	11	1	0	0.48	0.3125	0.611111	0.2	0
1	133923008	133923037	46	29	133923023	30	45	0.978261	133923018	133923027	10	AAGTAACCTTTCAGTGACTT	1_+_13714	NM_007923	+	'extend_3'TUR'	133922262	133927261	13	11	7	4	10	0.52	0.6875	0.388889	0.8	1
1	122504547	122504581	268	34	122504566	171	257	0.958955	122504560	122504566	7	AGTTGCTGACTGCCCTCTTC	1_+_13798	NM_010133	+	'PA'	122504558	122504578	76	41	60	22	58	1	1	1	1	1
1	174249947	174249986	616	39	174249964	319	587	0.952922	174249964	174249971	8	AAAATCGAGGCCTGTTGTGT	1_+_140559	NM_080419	+	'PA'	174249956	174249976	123	81	123	85	175	1	1	1	1	1
1	135944717	135944757	1055	40	135944736	705	1025	0.971564	135944735	135944742	8	ATCTGCAAGGATGGAATGGT	1_+_14264	NM_021355	+	'3'UTR'	135943203	135944854	409	109	79	80	348	0.960094	0.964602	0.940476	0.987654	0.963989
1	59543774	59543817	1475	43	59543798	1079	1418	0.961356	59543791	59543801	11	ACAAAGTGAATGTTTATTTA	1_+_14369	NM_008057	+	'PA'	59543789	59543809	216	291	237	206	468	0.931034	0.898148	0.884328	0.915556	0.923077
1	82892203	82892265	1393	62	82892247	915	1326	0.951902	82892242	82892250	9	ATGCTATTGTTTTTGTGTTC	1_+_15463	NM_010472	+	'3'UTR'	82891634	82892850	382	239	239	132	334	0.584098	0.608142	0.496881	0.507692	0.506061
1	82892919	82892973	653	54	82892955	506	621	0.950995	82892952	82892957	6	ACCCCTAAGTTATGAATTTT	1_+_15463	NM_010472	+	'extend_3'TUR'	82892851	82897850	147	96	136	73	169	0.224771	0.244275	0.282744	0.280769	0.256061
1	82897556	82897590	220	34	82897576	156	212	0.963636	82897569	82897576	8	TGGGATGGCCTCTTCAATTG	1_+_15463	NM_010472	+	'extend_3'TUR'	82892851	82897850	35	26	56	17	78	0.0535168	0.0661578	0.116424	0.0653846	0.118182
1	55148053	55148103	18236	50	55148082	7642	17519	0.960682	55148074	55148083	10	AGCCATTGTCTCTGACCTTT	1_+_15528	NM_008303	+	'3'UTR'	55147965	55148161	4969	3232	5563	2360	4191	0.552234	0.536699	0.517922	0.539799	0.498691
1	55148126	55148180	16825	54	55148150	7193	16259	0.96636	55148149	55148161	13	AGTGGACAGTCTTTGGTAAT	1_+_15528	NM_008303	+	'3'UTR'	55147965	55148161	4029	2790	5178	2012	4213	0.447766	0.463301	0.482078	0.460201	0.501309
1	72899015	72899072	3250	57	72899037	1668	3105	0.955385	72899036	72899044	9	AAAAATAAAAAGTGTGTGTC	1_+_16008	NM_008342	+	'PA'	72899035	72899055	815	138	739	239	1174	1	1	1	1	1
1	40608533	40608566	211	33	40608550	178	201	0.952607	40608550	40608551	2	AATTTGCTGTTTTATCTCAT	1_+_16174	NM_010553	+	'PA'	40608540	40608560	55	16	34	42	54	1	1	1	1	1
1	40372991	40373057	879	66	40373009	325	862	0.98066	40373009	40373043	35	AATAAATTGTTAAAGCCTCT	1_+_16177	NM_008362	+	'3'UTR'	40370239	40373022	133	124	178	143	284	0.618605	0.939394	0.827907	0.928571	0.879257
1	40294976	40295007	180	31	40294992	177	177	0.983333	40294992	40294992	1	AACTTGCTTCTTGGTCATGA	1_+_16177	NM_008362	+	'intron'	40282152	40339077	82	8	37	11	39	0.381395	0.0606061	0.172093	0.0714286	0.120743
1	75506920	75506948	23	28	75506934	4	23	1	75506929	75506940	12	CTTTGTATGTGTTCCCCTCA	1_+_16322	NM_010564	+	'PA'	75506919	75506939	12	0	1	1	9	1	0	1	1	1
1	173394121	173394158	663	37	173394140	318	632	0.953243	173394138	173394143	6	ACTTCTTTTTTGTTGAACAT	1_+_16456	NM_172647	+	'3'UTR'	173393226	173394724	245	17	117	66	187	0.953307	1	0.866667	0.916667	0.882075
1	173394711	173394742	62	31	173394726	23	61	0.983871	173394724	173394732	9	ACTTGGAATTTTTTTTATGT	1_+_16456	NM_172647	+	'PA'	173394714	173394734	12	0	18	6	25	0.0466926	0	0.133333	0.0833333	0.117925
1	138074560	138074601	82	41	138074575	35	78	0.95122	138074573	138074577	5	AGAGGTGTGGCTAGTGGGTT	1_+_16565	NM_001039472	+	'3'UTR'	138070669	138074591	20	0	23	17	18	1	0	1	1	1
1	165724210	165724249	1056	39	165724229	669	1004	0.950758	165724228	165724234	7	AAAAGGTAAGCAGAAGGAGT	1_+_16579	NM_010629	+	'exon'	165724080	165724234	417	90	158	77	262	0.418675	0.251397	0.334038	0.296154	0.324257
1	165847196	165847253	1785	57	165847234	927	1750	0.980392	165847230	165847237	8	AGCACTGTCCAACTCTCATT	1_+_16579	NM_010629	+	'PA'	165847221	165847241	543	244	290	168	505	0.545181	0.681564	0.613108	0.646154	0.625
1	133070030	133070085	772	55	133070048	325	734	0.950777	133070046	133070055	10	ACTGAAAGCTTTTATTTCTA	1_+_16865	NM_001136070	+	'PA'	133070038	133070058	186	127	150	72	199	1	1	1	1	1
1	93013863	93013916	5436	53	93013891	2653	5168	0.950699	93013891	93013899	9	ACAAGCCTACTGGTTGTTCT	1_+_16978	NM_001111311	+	'PA'	93013889	93013909	988	1294	1323	612	951	0.659546	0.802232	0.679158	0.686099	0.613153
1	93025481	93025539	2165	58	93025521	851	2096	0.968129	93025507	93025522	16	TGTGTGGGTTTTGTTTTTTA	1_+_16978	NM_008515	+	'PA'	93025511	93025531	420	278	569	256	573	0.280374	0.17235	0.292094	0.286996	0.369439
1	9889915	9889952	71	37	9889929	32	68	0.957746	9889928	9889940	13	AAGTCTGGGTTGGTGTGAAT	1_+_170755	NM_177547	+	'3'UTR'	9888972	9892649	19	17	4	11	17	0.791667	0.62963	0.266667	0.611111	0.607143
1	9890077	9890101	23	24	9890089	10	22	0.956522	9890089	9890092	4	ACACACATGTCTCTTGGTGT	1_+_170755	NM_177547	+	'3'UTR'	9888972	9892649	4	6	6	2	4	0.166667	0.222222	0.4	0.111111	0.142857
1	9890912	9890938	23	26	9890924	14	22	0.956522	9890924	9890930	7	AACAGTTGGACTATTTCATG	1_+_170755	NM_177547	+	'3'UTR'	9888972	9892649	1	4	5	5	7	0.0416667	0.148148	0.333333	0.277778	0.25
1	182684025	182684084	871	59	182684045	601	845	0.970149	182684044	182684055	12	AAGCACTAATATATATTTCT	1_+_170760	NM_133225	+	'3'UTR'	182682502	182684335	239	104	191	107	204	0.294335	0.395437	0.335677	0.387681	0.375
1	182684268	182684352	1076	84	182684296	575	1024	0.951673	182684295	182684338	44	AAGTCGTCGATGTTTCTGTT	1_+_170760	NM_133225	+	'3'UTR'	182682502	182684335	212	124	301	138	249	0.261084	0.471483	0.528998	0.5	0.457721
1	182664608	182664648	328	40	182664629	171	321	0.978659	182664623	182664635	13	AAGAAGAAGAGAAAAGAAGG	1_+_170760	NM_133225	+	'exon'	182664508	182664648	264	9	17	13	18	0.325123	0.0342205	0.029877	0.0471014	0.0330882
1	182686198	182686232	247	34	182686214	147	241	0.975709	182686214	182686219	6	ACTTTATTTGTTTGAGTGTT	1_+_170760	NM_133225	+	'extend_3'TUR'	182684336	182689335	72	23	58	18	70	0.08867	0.0874525	0.101933	0.0652174	0.128676
1	40503550	40503598	742	48	40503578	323	712	0.959569	40503567	40503579	13	ATCCGTTTTCTCCGAGGACT	1_+_17082	NM_010743	+	'3'UTR'	40503550	40505207	124	75	176	174	163	0.0844112	0.0569476	0.101441	0.0686932	0.083376
1	40504951	40505071	6180	120	40504988	1937	5884	0.952104	40504985	40505042	58	AATGATCATAATGAATTCTT	1_+_17082	NM_010743	+	'3'UTR'	40503550	40505207	822	952	1096	1804	1210	0.559564	0.722855	0.6317	0.712199	0.618926
1	40522226	40522278	2242	52	40522257	1350	2138	0.953613	40522255	40522263	9	AAATACTGTTTGGCCTTCGT	1_+_17082	NM_001025602	+	'PA'	40522249	40522269	461	249	419	501	508	0.313819	0.189066	0.241499	0.197789	0.259847
1	92820635	92820663	59	28	92820650	30	57	0.966102	92820648	92820652	5	TTTTTAATCAGCAGAAGGGA	1_+_171531	NM_053015	+	'intron'	92818556	92824559	10	16	10	3	18	1	1	1	1	1
1	166367406	166367444	483	38	166367425	292	461	0.954451	166367425	166367430	6	AAACAAGTGACTTTGGTTTT	1_+_171567	NM_138314	+	'PA'	166367417	166367437	132	36	126	61	106	1	1	1	1	1
1	66468783	66468822	1912	39	66468804	1789	1841	0.962866	66468804	66468805	2	ATAAAAGGAAAGAAAGAAAG	1_+_17756	NM_008632	+	'intron'	66468365	66471770	454	264	352	153	618	0.932238	0.94964	0.921466	0.950311	0.933535
1	66489139	66489169	134	30	66489155	96	129	0.962687	66489153	66489157	5	AACTACAAGTTTCAGATTTT	1_+_17756	NM_008632	+	'PA'	66489147	66489167	33	14	30	8	44	0.0677618	0.0503597	0.078534	0.0496894	0.0664653
1	154683368	154683397	57	29	154683383	41	55	0.964912	154683380	154683388	9	AATATGACAACTCAGAAGAT	1_+_17970	NM_010877	+	'3'UTR'	154683245	154684120	26	3	7	4	15	1	1	1	1	1
1	43627333	43627379	1753	46	43627361	991	1697	0.968055	43627359	43627364	6	AAGGCTGTGTGTTTGTGTTT	1_+_17974	NM_010879	+	'PA'	43627353	43627373	566	232	292	137	470	1	1	1	1	1
1	95406280	95406329	9901	49	95406307	7341	9478	0.957277	95406302	95406310	9	AAATGAGTAGTCCTCTTTTT	1_+_18000	NM_010891	+	'PA'	95406299	95406319	2934	1590	2354	1251	2736	0.968956	0.979064	0.955745	0.969767	0.964399
1	193656890	193656941	175	51	193656927	107	167	0.954286	193656904	193656928	25	ATCACTGTGATGTTTGTATT	1_+_18005	NM_010892	+	'PA'	193656918	193656938	21	64	45	12	25	1	1	1	1	1
1	39420067	39420096	67	29	39420081	37	64	0.955224	39420079	39420085	7	AATTTCCTTGGTCCCTTGTT	1_+_18143	NM_008719	+	'PA'	39420075	39420095	19	3	9	7	26	1	1	1	1	1
1	62865241	62865280	1448	39	62865261	770	1428	0.986188	62865259	62865265	7	AACTATTTTTCCTACATTGT	1_+_18187	NM_010939	+	'PA'	62865256	62865276	206	160	484	163	415	1	1	1	1	1
1	173289364	173289400	389	36	173289384	310	380	0.976864	173289383	173289385	3	ATGCCTGGCTCTATTTTTTG	1_+_18637	NM_011070	+	'extend_3'TUR'	173288302	173293301	119	43	85	43	90	0.183077	0.0738832	0.104809	0.0975057	0.12931
1	173288274	173288318	2917	44	173288300	1554	2800	0.95989	173288292	173288300	9	AGCTATAGCCTGAACCTTTA	1_+_18637	NM_011070	+	'PA'	173288291	173288311	531	539	726	398	606	0.816923	0.926117	0.895191	0.902494	0.87069
1	132748502	132748567	404	65	132748546	118	391	0.967822	132748516	132748554	39	AAAGACAGACAGACAAAAAG	1_+_18703	NM_011082	+	'3'UTR'	132747474	132748826	168	50	59	56	58	1	1	1	1	1
1	65323336	65323391	768	55	65323374	342	743	0.967448	65323353	65323377	25	ACTAGATTTCAGATCTCTTT	1_+_18711	NM_011086	+	'3'UTR'	65320333	65325270	205	82	186	84	186	0.953488	0.953488	0.920792	1	0.925373
1	4836795	4836842	1538	47	4836815	1057	1484	0.964889	4836812	4836821	10	ATCGATTGCTTTATATAGTA	1_+_18777	NM_008866	+	'PA'	4836806	4836826	392	176	320	174	422	0.972705	0.961749	0.972644	0.977528	0.970115
1	109422158	109422191	66	33	109422175	30	63	0.954545	109422168	109422176	9	GATTTTTGTTTTAGAAACGT	1_+_18788	NM_001174170	+	'PA'	109422167	109422187	4	41	8	4	6	1	1	1	1	1
1	42757036	42757064	51	28	42757052	41	49	0.960784	42757048	42757053	6	AAATGGTCTGTGTCTGATGC	1_+_18993	NM_008900	+	'PA'	42757044	42757064	37	4	5	1	2	1	1	1	1	1
1	55209895	55209945	1685	50	55209917	1313	1604	0.951929	55209916	55209927	12	AAATGCTGCTAAACAATCAT	1_+_19070	NM_025283	+	'3'UTR'	55209651	55211743	385	243	468	181	327	0.388496	0.484064	0.496815	0.471354	0.391617
1	55211650	55211711	1435	61	55211691	880	1405	0.979094	55211685	55211696	12	ACTCCACCCTCCCTGTAGTA	1_+_19070	NM_025283	+	'3'UTR'	55209651	55211743	402	194	318	137	354	0.405651	0.386454	0.33758	0.356771	0.423952
1	55211724	55211759	290	35	55211742	213	279	0.962069	55211741	55211746	6	ATCAGTTTGTATTCTTGCTT	1_+_19070	NM_025283	+	'PA'	55211733	55211753	97	20	52	30	80	0.0978809	0.0398406	0.0552017	0.078125	0.0958084
1	151955244	151955413	11540	169	151955356	4833	11205	0.970971	151955286	151955366	81	ATATCATGGCATTGATATCT	1_+_19225	NM_011198	+	'extend_3'TUR'	151955143	151960142	1115	3058	2608	1972	2452	0.925311	0.975128	0.963428	0.959611	0.963079
1	88427233	88427301	20349	68	88427273	7647	19490	0.957787	88427258	88427277	20	AATGGTGTCTCAAAGCCTGG	1_+_19231	NM_008972	+	'PA'	88427263	88427283	8112	6338	8300	4190	7985	0.947	0.972981	0.972694	0.974645	0.972476
1	191675839	191675871	167	32	191675857	78	162	0.97006	191675854	191675857	4	AATATTGTTGGATTGTAGTT	1_+_19250	NM_008976	+	'intron'	191675387	191678803	36	19	40	19	48	0.057971	0.106145	0.125	0.134752	0.107623
1	191700550	191700604	1415	54	191700570	1260	1360	0.961131	191700568	191700571	4	AAAATACCTGTCTTTTGGTA	1_+_19250	NM_008976	+	'PA'	191700562	191700582	510	131	251	110	358	0.821256	0.731844	0.784375	0.780142	0.802691
1	174065394	174065437	641	43	174065414	384	621	0.968799	174065411	174065416	6	TGTGTGGGTTATTTTTCATC	1_+_19298	NM_001159525	+	'3'UTR'	174064422	174066628	210	56	133	51	171	0.557029	0.543689	0.478417	0.451327	0.553398
1	174061129	174061159	88	30	174061145	70	86	0.977273	174061143	174061148	6	AGTTTGACTGATTCATTCTT	1_+_19298	NM_001159525	+	'intron'	174060905	174063260	24	5	20	10	27	0.0636605	0.0485437	0.0719424	0.0884956	0.0873786
1	174066604	174066652	355	48	174066621	201	340	0.957746	174066621	174066628	8	AAATACTAAAGTTTTTAGAC	1_+_19298	NM_001159525	+	'PA'	174066618	174066638	111	30	83	41	75	0.29443	0.291262	0.298561	0.362832	0.242718
1	33797534	33797571	882	37	33797554	597	845	0.95805	33797552	33797557	6	AACGTGTGCTTTTCCTTTCT	1_+_19335	NM_008999	+	'3'UTR'	33796238	33799409	205	139	190	118	193	0.497573	0.414925	0.524862	0.522124	0.374757
1	33797597	33797631	238	34	33797616	135	227	0.953782	33797611	33797616	6	ATTTCTCTTGTCTTTTTTTT	1_+_19335	NM_008999	+	'3'UTR'	33796238	33799409	43	45	57	40	42	0.104369	0.134328	0.157459	0.176991	0.0815534
1	33799358	33799424	750	66	33799405	302	731	0.974667	33799404	33799411	8	AGAATGAATTGTGTGTGGTG	1_+_19335	NM_008999	+	'PA'	33799399	33799419	154	140	105	59	273	0.373786	0.41791	0.290055	0.261062	0.530097
1	155592567	155592613	675	46	155592594	348	643	0.952593	155592586	155592599	14	AATATTTCCCAGGACAGTAT	1_+_19734	NM_011267	+	'PA'	155592588	155592608	110	149	98	73	213	1	1	1	1	1
1	171625906	171625944	177	38	171625922	78	169	0.954802	171625920	171625928	9	AACAGAAGTCACATTTTATG	1_+_19737	NM_009063	+	'extend_3'TUR'	171623658	171628657	86	7	30	17	29	1	1	1	1	1
1	72760167	72760296	16516	129	72760190	6749	16039	0.971119	72760189	72760246	58	TAACTTTTTTTTTTTTGCCT	1_+_19981	NM_009084	+	'3'UTR'	72760140	72760387	12335	5380	11021	4580	10543	0.984516	0.983007	0.982176	0.980308	0.981932
1	83115726	83115754	55	28	83115741	45	53	0.963636	83115740	83115742	3	ACTTGTTGATAGAGTCATAT	1_+_20297	NM_001159738	+	'PA'	83115732	83115752	1	1	14	12	25	1	1	1	1	1
1	51359753	51359827	13360	74	51359790	7215	12715	0.951722	51359777	51359800	24	ATATAACAATGTCAGTTTGT	1_+_20324	NM_138741	+	'3'UTR'	51358267	51359804	5612	2100	1622	1303	3841	0.969592	0.919842	0.931114	0.955979	0.952629
1	165988603	165988629	36	26	165988617	31	35	0.972222	165988615	165988617	3	ATCTTTGTGTATCTGAGTCT	1_+_20339	NM_011345	+	'extend_3'TUR'	165987809	165992808	2	4	12	10	7	1	1	1	1	1
1	75555630	75555670	138	40	75555645	45	135	0.978261	75555645	75555658	14	ACTCCGTGTCTTGTGTCTGC	1_+_20536	NM_009208	+	'3'UTR'	75555466	75556006	43	9	27	13	43	1	1	1	1	1
1	109504169	109504201	92	32	109504187	68	88	0.956522	109504186	109504189	4	AAATTTGCCAAGGTGATTTC	1_+_20725	NM_011459	+	'3'UTR'	109503903	109505555	39	18	7	9	15	0.573529	0.75	0.5	0.692308	0.517241
1	109507036	109507062	22	26	109507048	17	21	0.954545	109507048	109507052	5	ATGCATGCTCACATATTCAC	1_+_20725	NM_001159748	+	'extend_3'TUR'	109502728	109507727	11	4	4	0	2	0.161765	0.166667	0.285714	0	0.0689655
1	109505543	109505569	39	26	109505557	25	39	1	109505555	109505560	6	AATACTGTCAGTATAATGTT	1_+_20725	NM_011459	+	'PA'	109505545	109505565	18	2	3	4	12	0.264706	0.0833333	0.214286	0.307692	0.413793
1	52216863	52216897	189	34	52216880	124	182	0.962963	52216879	52216883	5	ATTAAGGGGGCCAGCTTTCT	1_+_20846	NM_009283	+	'3'UTR'	52216142	52218709	30	9	60	17	66	0.128755	0.108434	0.225564	0.195402	0.184874
1	52217744	52217785	348	41	52217766	112	334	0.95977	52217760	52217771	12	TCTAGTGTTATGAGTTGGTT	1_+_20846	NM_009283	+	'3'UTR'	52216142	52218709	47	18	99	27	143	0.201717	0.216867	0.37218	0.310345	0.40056
1	52221790	52221829	339	39	52221812	176	329	0.970501	52221804	52221813	10	CAAAAACAACAACCCAACCC	1_+_20846	NM_009283	+	'extend_3'TUR'	52218710	52223709	109	44	72	25	79	0.467811	0.53012	0.270677	0.287356	0.221289
1	52212209	52212269	190	60	52212252	139	181	0.952632	52212240	52212260	21	AAAACTTGATGAGTGGGAAA	1_+_20846	NM_009283	+	'intron'	52211906	52212826	47	12	35	18	69	0.201717	0.144578	0.131579	0.206897	0.193277
1	88946651	88946685	177	34	88946671	115	171	0.966102	88946665	88946672	8	TGTCTGTGTAGATGCCATGG	1_+_208718	NM_001172157	+	'PA'	88946662	88946682	66	21	20	14	50	1	1	1	1	1
1	75210787	75210854	1024	67	75210817	484	986	0.962891	75210803	75210820	18	TATATTTTAGGTCAATGTGT	1_+_20872	NM_001277992	+	'3'UTR'	75210528	75212181	316	98	215	101	256	0.880223	0.796748	0.759717	0.801587	0.867797
1	75208794	75208834	209	40	75208811	114	200	0.956938	75208809	75208813	5	ATGCCCTGGTTTGGCCTTTT	1_+_20872	NM_001277992	+	'intron'	75208720	75209174	43	25	68	25	39	0.119777	0.203252	0.240283	0.198413	0.132203
1	182796488	182796515	48	27	182796502	43	47	0.979167	182796502	182796505	4	AATTCGGTTCTAACTAGTCT	1_+_208768	NM_145943	+	'3'UTR'	182796425	182798245	6	9	11	8	13	0.0357143	0.09	0.0541872	0.117647	0.0822785
1	182797485	182797516	74	31	182797502	26	74	1	182797496	182797506	11	TGCTAAGTTGTCAGTTGTAT	1_+_208768	NM_145943	+	'3'UTR'	182796425	182798245	15	11	32	6	10	0.0892857	0.11	0.157635	0.0882353	0.0632911
1	182797679	182797715	193	36	182797700	123	186	0.963731	182797693	182797703	11	ATATGGCTCTGATGGGTTTT	1_+_208768	NM_145943	+	'3'UTR'	182796425	182798245	45	28	59	20	34	0.267857	0.28	0.29064	0.294118	0.21519
1	182798217	182798257	405	40	182798238	203	390	0.962963	182798238	182798245	8	AAGCAATTGTTTTGGAGTTT	1_+_208768	NM_145943	+	'PA'	182798235	182798255	102	52	101	34	101	0.607143	0.52	0.497537	0.5	0.639241
1	182905215	182905259	867	44	182905234	395	826	0.95271	182905233	182905239	7	AGACCCTGCCTCTCATGCTT	1_+_208795	NM_144794	+	'PA'	182905225	182905245	215	88	226	61	236	1	1	1	1	1
1	184392543	184392579	453	36	184392561	284	440	0.971302	184392560	184392566	7	AAGCTATTTCCTGGTTTTCC	1_+_209456	NM_173378	+	'PA'	184392557	184392577	106	75	98	48	113	1	1	1	1	1
1	10126822	10126865	238	43	10126847	163	234	0.983193	10126846	10126854	9	AACTACCAGTGTCGGTTTCT	1_+_211660	NM_026493	+	'PA'	10126839	10126859	69	22	41	29	73	1	1	1	1	1
1	132641184	132641210	34	26	132641198	29	34	1	132641197	132641200	4	ATTCTGGAGTCCCTGTTCTT	1_+_212439	NM_177604	+	'PA'	132641189	132641209	6	9	8	2	9	1	1	1	1	1
1	55295914	55295981	57	67	55295964	18	55	0.964912	55295924	55295965	42	AACGATTCAGGTCTCTCTAA	1_+_212679	NM_175439	+	'3'UTR'	55295845	55296902	15	11	12	8	9	0.174419	0.171875	0.141176	0.177778	0.121622
1	55300867	55300897	112	30	55300883	102	109	0.973214	55300882	55300884	3	AAACATGTTGAAGATGTTTT	1_+_212679	NM_175439	+	'extend_3'TUR'	55296903	55301902	24	24	22	15	24	0.27907	0.375	0.258824	0.333333	0.324324
1	55296876	55296915	200	39	55296892	107	190	0.95	55296891	55296903	13	ACCTTCTTTACAGCTGTTTG	1_+_212679	NM_175439	+	'PA'	55296892	55296912	47	29	51	22	41	0.546512	0.453125	0.6	0.488889	0.554054
1	133714676	133714703	50	27	133714691	26	49	0.98	133714689	133714691	3	TTTGTGGTATTGTGTTCTTG	1_+_212933	NM_178079	+	'PA'	133714682	133714702	25	1	5	3	15	1	1	1	1	1
1	134201730	134201770	357	40	134201755	158	348	0.97479	134201744	134201756	13	AATCCCTTGTTTCTCTTTGG	1_+_213417	NM_144810	+	'3'UTR'	134201370	134203934	67	53	97	24	107	0.183562	0.190647	0.197556	0.100418	0.202268
1	134202077	134202166	1535	89	134202147	408	1482	0.965472	134202094	134202152	59	ATCTTTATCCCTGTCTTCTT	1_+_213417	NM_144810	+	'3'UTR'	134201370	134203934	281	217	375	201	408	0.769863	0.780576	0.763747	0.841004	0.771267
1	134363270	134363336	398	66	134363286	109	391	0.982412	134363286	134363325	40	AAAAATTTACTCGACACCAA	1_+_213452	NM_172516	+	'3'UTR'	134360089	134363536	119	52	85	31	104	0.753165	0.742857	0.696721	0.688889	0.604651
1	134363519	134363550	135	31	134363535	64	131	0.97037	134363534	134363537	4	CAGCGTTGCCTGTTTGGCTT	1_+_213452	NM_172516	+	'PA'	134363526	134363546	28	12	28	11	52	0.177215	0.171429	0.229508	0.244444	0.302326
1	174437483	174437528	3851	45	174437506	1237	3762	0.976889	174437500	174437510	11	ATGGATTCTGGCTGTTTCTA	1_+_21346	NM_178598	+	'PA'	174437496	174437516	774	1050	907	363	668	1	1	1	1	1
1	134401447	134401484	117	37	134401467	42	112	0.957265	134401462	134401473	12	ATTTGTACAATAAGTGTTTG	1_+_213464	NM_172517	+	'3'UTR'	134400370	134402242	31	21	22	17	21	0.322917	0.381818	0.468085	0.333333	0.313433
1	134402214	134402273	214	59	134402233	117	204	0.953271	134402232	134402244	13	AAACCACAAGTATACATGCT	1_+_213464	NM_172517	+	'PA'	134402232	134402252	65	34	25	34	46	0.677083	0.618182	0.531915	0.666667	0.686567
1	4886708	4886746	245	38	4886732	87	233	0.95102	4886724	4886733	10	AAAAATTTTGTTGATCTGTT	1_+_21399	NM_001159751	+	'3'UTR'	4886446	4887990	37	45	59	25	67	0.0831461	0.18595	0.150127	0.134409	0.126894
1	4887027	4887062	175	35	4887049	71	175	1	4887041	4887049	9	ACTTGGTTTATTTTATTTGA	1_+_21399	NM_001159751	+	'3'UTR'	4886446	4887990	32	37	37	21	48	0.0719101	0.152893	0.0941476	0.112903	0.0909091
1	4887533	4887580	154	47	4887551	108	147	0.954545	4887546	4887555	10	AAGTGCTTCTGCCTGTGTTC	1_+_21399	NM_001159751	+	'3'UTR'	4886446	4887990	28	22	35	18	44	0.0629213	0.0909091	0.0890585	0.0967742	0.0833333
1	4876835	4876868	253	33	4876854	145	252	0.996047	4876849	4876854	6	AAAAGAAAAAAGAGCCTGCA	1_+_21399	NM_001159751	+	'exon'	4876825	4876912	115	19	42	17	59	0.258427	0.0785124	0.10687	0.0913978	0.111742
1	4887966	4888006	944	40	4887989	485	906	0.959746	4887983	4887990	8	ACATGTTTTTTGTCTTTTTA	1_+_21399	NM_001159751	+	'PA'	4887980	4888000	212	106	199	93	296	0.476404	0.438017	0.506361	0.5	0.560606
1	19228630	19228666	26	36	19228654	14	26	1	19228636	19228657	22	TTTGTTGTGTTCTCCTCTTC	1_+_21419	NM_009334	+	'3'UTR'	19224429	19228926	14	4	0	1	7	1	1	0	1	1
1	36377356	36377385	54	29	36377372	35	53	0.981481	36377368	36377374	7	AGCCCTGGGGTGTACAGCAC	1_+_214855	NM_001290727	+	'3'UTR'	36377049	36380874	4	1	23	4	21	0.666667	0.5	0.676471	0.8	0.777778
1	36379805	36379830	21	25	36379820	14	21	1	36379815	36379820	6	AGTCCTGGCTCCCAGATTTG	1_+_214855	NM_001290727	+	'3'UTR'	36377049	36380874	2	1	11	1	6	0.333333	0.5	0.323529	0.2	0.222222
1	15833208	15833234	24	26	15833223	16	23	0.958333	15833217	15833225	9	ACACTTTGTTTACAATTTCC	1_+_21749	NM_009352	+	'3'UTR'	15833164	15834133	6	10	2	3	2	0.125	0.0847458	0.0227273	0.0789474	0.037037
1	15833484	15833527	312	43	15833509	159	299	0.958333	15833508	15833516	9	ATTTACGGTTTGTTCTATTC	1_+_21749	NM_009352	+	'3'UTR'	15833164	15834133	41	101	76	35	46	0.854167	0.855932	0.863636	0.921053	0.851852
1	15835413	15835443	24	30	15835429	11	24	1	15835422	15835435	14	AGAACGAATAGTATGTTTGA	1_+_21749	NM_009352	+	'extend_3'TUR'	15834134	15839133	1	7	10	0	6	0.0208333	0.059322	0.113636	0	0.111111
1	107744141	107744173	84	32	107744159	59	81	0.964286	107744156	107744162	7	ATCATCTCTCCATGCCTACT	1_+_21934	NM_009399	+	'3'UTR'	107741444	107744558	21	21	15	5	19	0.323077	0.308824	0.3125	0.357143	0.422222
1	107744487	107744566	117	79	107744522	48	112	0.957265	107744511	107744557	47	AAAGAGATTATTAAAACTTT	1_+_21934	NM_009399	+	'3'UTR'	107741444	107744558	21	39	25	8	19	0.323077	0.573529	0.520833	0.571429	0.422222
1	107710962	107710992	48	30	107710980	30	47	0.979167	107710973	107710980	8	AAATGGTTGGCTTGGTTTTT	1_+_21934	NM_009399	+	'intron'	107710372	107714245	23	8	8	1	7	0.353846	0.117647	0.166667	0.0714286	0.155556
1	173271729	173271769	357	40	173271747	213	349	0.977591	173271746	173271755	10	AAGGTGGGACTCTGAAGTGT	1_+_21945	NM_001128609	+	'3'UTR'	173271336	173272632	98	48	71	46	86	0.290801	0.266667	0.248252	0.294872	0.288591
1	173271788	173271837	711	49	173271819	317	690	0.970464	173271819	173271823	5	AGAGAAGCTGTGGCCCTTTG	1_+_21945	NM_001128609	+	'3'UTR'	173271336	173272632	175	105	160	85	165	0.519288	0.583333	0.559441	0.544872	0.553691
1	173272441	173272493	202	52	173272458	113	193	0.955446	173272456	173272481	26	AAAATCCCACTTTTCTGAAA	1_+_21945	NM_001128609	+	'3'UTR'	173271336	173272632	59	24	48	23	39	0.175074	0.133333	0.167832	0.147436	0.130872
1	137748821	137748851	106	30	137748837	86	101	0.95283	137748836	137748838	3	ACATATGGAATAGTGTTTCT	1_+_21956	NM_001130181	+	'PA'	137748835	137748855	20	19	46	9	7	1	1	1	1	1
1	44059160	44059203	1921	43	44059183	749	1843	0.959396	44059181	44059186	6	AGAACTCAGTGGCGTGTGGC	1_+_22019	NM_009418	+	'3'UTR'	44059039	44059816	398	318	446	234	447	0.438326	0.473214	0.437684	0.440678	0.425309
1	44059819	44059864	2224	45	44059844	1535	2122	0.954137	44059843	44059845	3	ATTCACAATTGGTCTTAATT	1_+_22019	NM_009418	+	'extend_3'TUR'	44059817	44064816	451	330	520	265	556	0.496696	0.491071	0.510304	0.499058	0.52902
1	74850734	74850759	22	25	74850747	16	21	0.954545	74850745	74850748	4	AAACAAGGTTATTCCAGGCA	1_+_22409	NM_009518	+	'PA'	74850739	74850759	5	5	0	1	10	1	1	0	1	1
1	44237995	44238033	1018	38	44238015	599	980	0.962672	44238012	44238016	5	ATTTTGAATGTATAGTTTTA	1_+_22592	NM_011729	+	'3'UTR'	44237928	44238105	357	76	163	110	274	0.669794	0.571429	0.608209	0.614525	0.59436
1	44238060	44238111	580	51	44238079	265	567	0.977586	44238077	44238098	22	AAAAATTTTACATAAAAGTA	1_+_22592	NM_011729	+	'3'UTR'	44237928	44238105	159	56	104	67	181	0.298311	0.421053	0.38806	0.374302	0.392625
1	72441498	72441543	872	45	72441526	514	845	0.969037	72441513	72441527	15	ATTTCTTGTGTGAAGTCTCA	1_+_22596	NM_009533	+	'PA'	72441517	72441537	147	101	211	107	279	1	1	1	1	1
1	121424784	121424816	82	32	121424801	51	79	0.963415	121424801	121424805	5	AAGTTTCTGTGTGAAGATAT	1_+_226351	NM_146103	+	'3'UTR'	121424141	121425560	26	6	22	13	12	0.604651	0.5	0.709677	0.8125	0.387097
1	121424830	121424884	56	54	121424861	17	54	0.964286	121424843	121424879	37	AATATGTCCCTGACCCAGAA	1_+_226351	NM_146103	+	'3'UTR'	121424141	121425560	17	6	9	3	19	0.395349	0.5	0.290323	0.1875	0.612903
1	129840064	129840102	137	38	129840088	80	131	0.956204	129840081	129840090	10	AAATTCCGCCTGTGTGATTT	1_+_226407	NM_178690	+	'3'UTR'	129839188	129840453	24	12	38	14	43	0.2	0.26087	0.361905	0.297872	0.358333
1	129840428	129840465	317	37	129840445	225	307	0.968454	129840444	129840453	10	ATGTGTGGACTTGTGGCTTT	1_+_226407	NM_178690	+	'PA'	129840443	129840463	96	34	67	33	77	0.8	0.73913	0.638095	0.702128	0.641667
1	132620913	132620949	323	36	132620932	154	320	0.990712	132620927	132620935	9	ATTGTTGTGCGAGCATATTT	1_+_226418	NM_178691	+	'extend_3'TUR'	132618635	132623634	58	52	95	39	76	1	1	1	1	1
1	133610004	133610056	308	52	133610039	228	295	0.957792	133610039	133610044	6	AATGCACGTGTCATTTGAAG	1_+_226421	NM_145509	+	'PA'	133610031	133610051	84	8	68	44	91	1	1	1	1	1
1	133769820	133769852	24	32	133769841	16	23	0.958333	133769833	133769842	10	ACTTGTGGTGTCTATGCCTA	1_+_226422	NM_144875	+	'extend_3'TUR'	133769465	133774464	3	5	7	3	5	0.0285714	0.116279	0.0945946	0.111111	0.046729
1	133769441	133769478	344	37	133769462	276	333	0.968023	133769461	133769466	6	AATTGTGGGTTGTGATGCTG	1_+_226422	NM_144875	+	'PA'	133769454	133769474	102	38	67	24	102	0.971429	0.883721	0.905405	0.888889	0.953271
1	138526170	138526208	217	38	138526186	129	209	0.963134	138526186	138526195	10	TGCAAGTGTAAAACACTTCT	1_+_226442	NM_001160251	+	'3'UTR'	138524545	138526968	52	33	49	25	50	0.143646	0.120879	0.125641	0.116279	0.111607
1	138526596	138526648	1193	52	138526617	656	1150	0.963956	138526617	138526634	18	AACATTGAAGAAAGGAGATA	1_+_226442	NM_001160251	+	'3'UTR'	138524545	138526968	224	212	275	138	301	0.618785	0.776557	0.705128	0.64186	0.671875
1	138529661	138529694	256	33	138529679	156	251	0.980469	138529675	138529680	6	AGCTGTGGTGAACTTGTGTT	1_+_226442	NM_001160251	+	'extend_3'TUR'	138526969	138531968	74	17	49	40	71	0.20442	0.0622711	0.125641	0.186047	0.158482
1	141344654	141344685	78	31	141344670	50	75	0.961538	141344670	141344677	8	AAAGTTGAGTTTAGAAACTT	1_+_226470	NM_172643	+	'3'UTR'	141344108	141349584	25	14	22	6	8	0.101215	0.079096	0.102804	0.0697674	0.0361991
1	141344895	141344949	52	54	141344909	20	50	0.961538	141344908	141344940	33	AGACATTAAATTATCTAATT	1_+_226470	NM_172643	+	'3'UTR'	141344108	141349584	15	6	12	5	12	0.0607287	0.0338983	0.0560748	0.0581395	0.0542986
1	141345894	141345930	178	36	141345913	69	170	0.955056	141345909	141345918	10	ATCAAAGTTTGGTTGTTGTA	1_+_226470	NM_172643	+	'3'UTR'	141344108	141349584	56	24	38	9	43	0.226721	0.135593	0.17757	0.104651	0.19457
1	141347991	141348021	116	30	141348007	106	113	0.974138	141348006	141348008	3	ATTTTTTGGTTCTGAGTCTT	1_+_226470	NM_172643	+	'3'UTR'	141344108	141349584	35	22	24	9	23	0.1417	0.124294	0.11215	0.104651	0.104072
1	141349123	141349151	72	28	141349138	58	70	0.972222	141349137	141349140	4	ACTGTGGTGTGATTACTGAA	1_+_226470	NM_172643	+	'3'UTR'	141344108	141349584	21	12	14	8	15	0.0850202	0.0677966	0.0654206	0.0930233	0.0678733
1	141349530	141349597	429	67	141349579	174	408	0.951049	141349574	141349584	11	AAAGCACACCCAGGTTCTTT	1_+_226470	NM_172643	+	'PA'	141349574	141349594	87	91	84	40	106	0.352227	0.514124	0.392523	0.465116	0.479638
1	154966374	154966408	227	34	154966390	116	219	0.964758	154966389	154966395	7	ACTAGAGTCTTGTGTCTTTG	1_+_226518	NM_175460	+	'PA'	154966381	154966401	70	23	13	25	88	1	1	1	1	1
1	159419176	159419206	112	30	159419191	87	108	0.964286	159419191	159419195	5	AACTTGCTTCTTGGTCATGA	1_+_226527	NM_001033284	+	'extend_3'TUR'	159418865	159423864	27	3	18	15	45	1	1	1	1	1
1	181557583	181557621	534	38	181557605	261	508	0.951311	181557597	181557606	10	AAAATGTCTCCGAGAATTTA	1_+_226744	NM_146105	+	'PA'	181557594	181557614	108	98	105	54	143	1	1	1	1	1
1	182092577	182092660	76	83	182092631	20	73	0.960526	182092592	182092644	53	AAATACTGAATGTAAATAGT	1_+_226751	NM_001033285	+	'3'UTR'	182092298	182095733	21	14	20	7	11	0.0804598	0.089172	0.0934579	0.0654206	0.0572917
1	182092695	182092730	301	35	182092712	209	295	0.980066	182092712	182092717	6	AAAGAAATGTGTTGTTTCTT	1_+_226751	NM_001033285	+	'3'UTR'	182092298	182095733	117	51	55	27	45	0.448276	0.324841	0.257009	0.252336	0.234375
1	182095715	182095750	576	35	182095733	491	563	0.977431	182095733	182095736	4	AGCATTGAGTATTCTATTTC	1_+_226751	NM_001033285	+	'PA'	182095723	182095743	123	92	139	73	136	0.471264	0.585987	0.649533	0.682243	0.708333
1	193602474	193602525	289	51	193602506	104	277	0.958478	193602494	193602513	20	AAATTCAATGGATGGATTAA	1_+_226856	NM_001134829	+	'3'UTR'	193602414	193608134	84	38	51	44	60	0.198113	0.201058	0.138587	0.211538	0.143198
1	193606823	193606860	756	37	193606841	468	722	0.955026	193606840	193606844	5	AAAAACAATGCTTTTAATTC	1_+_226856	NM_001134829	+	'3'UTR'	193602414	193608134	195	95	192	84	156	0.459906	0.502646	0.521739	0.403846	0.372315
1	193608113	193608148	461	35	193608132	295	448	0.9718	193608129	193608132	4	AATTGGGTGGCCTTGTTCTT	1_+_226856	NM_001134829	+	'PA'	193608124	193608144	98	45	87	58	160	0.231132	0.238095	0.236413	0.278846	0.381862
1	34869563	34869599	105	36	34869583	58	102	0.971429	34869576	34869585	10	ACCTGGCTGCTGGTCAGCTG	1_+_226970	NM_183019	+	'3'UTR'	34868675	34869599	47	5	15	12	23	1	1	1	1	1
1	34936402	34936443	1216	41	34936422	848	1208	0.993421	34936420	34936430	11	AAACCGTGTCTCATTGTGAC	1_+_226971	NM_145516	+	'PA'	34936420	34936440	400	167	211	123	307	1	1	1	1	1
1	38108810	38108889	1923	79	38108864	1089	1840	0.956838	38108861	38108871	11	AACCAAGCTTCTACAGATTT	1_+_226982	NM_198303	+	'3'UTR'	38108559	38112424	418	313	491	246	372	0.572603	0.763415	0.791935	0.736527	0.696629
1	38110438	38110496	227	58	38110470	54	219	0.964758	38110453	38110483	31	ATTTTATAACCAGATCCAAT	1_+_226982	NM_198303	+	'3'UTR'	38108559	38112424	45	29	43	33	69	0.0616438	0.0707317	0.0693548	0.0988024	0.129213
1	38090923	38090956	188	33	38090942	150	186	0.989362	38090936	38090942	7	AAAAAGGTAACTCTGAGTAT	1_+_226982	NM_198303	+	'exon'	38090874	38090948	109	11	28	6	32	0.149315	0.0268293	0.0451613	0.0179641	0.0599251
1	52905495	52905535	309	40	52905516	227	297	0.961165	52905509	52905517	9	AAAACCAAACCAAACCAAAA	1_+_227095	NM_146108	+	'intron'	52901989	52910511	71	46	71	37	72	0.34466	0.396552	0.446541	0.41573	0.303797
1	52977686	52977737	536	51	52977704	313	510	0.951493	52977696	52977711	16	GAGGGGGTGTGTTGATGCCT	1_+_227095	NM_146108	+	'PA'	52977694	52977714	135	70	88	52	165	0.65534	0.603448	0.553459	0.58427	0.696203
1	53367058	53367102	652	44	53367082	384	638	0.978528	53367081	53367088	8	AAGATTATTTTAAGTTTTCC	1_+_227102	NM_145517	+	'PA'	53367079	53367099	155	90	160	61	172	1	1	1	1	1
1	55808428	55808463	295	35	55808448	102	294	0.99661	55808442	55808451	10	AGTATTTTACTGTAGTTAAT	1_+_227120	NM_001114663	+	'3'UTR'	55808308	55811129	99	33	89	21	52	0.622642	0.622642	0.695312	0.617647	0.626506
1	55809779	55809811	120	32	55809797	84	114	0.95	55809795	55809799	5	AGTTCTTGATCTTGTTTCTT	1_+_227120	NM_001114663	+	'3'UTR'	55808308	55811129	49	11	21	12	21	0.308176	0.207547	0.164062	0.352941	0.253012
1	55810925	55810956	51	31	55810939	36	49	0.960784	55810939	55810949	11	ATCACATAGTAACATTTTGA	1_+_227120	NM_001114663	+	'3'UTR'	55808308	55811129	11	9	18	1	10	0.0691824	0.169811	0.140625	0.0294118	0.120482
1	59051944	59051983	315	39	59051963	236	307	0.974603	59051957	59051969	13	AAACATCTCTTTTATATATT	1_+_227154	NM_172656	+	'PA'	59051955	59051975	128	41	54	26	58	1	1	1	1	1
1	64771861	64771898	329	37	64771882	266	314	0.954407	64771881	64771884	4	ACAACTATGTGCATTCTATT	1_+_227210	NM_001097644	+	'3'UTR'	64770214	64772216	78	61	73	32	70	0.145251	0.123732	0.116242	0.079602	0.111821
1	64772192	64772239	2308	47	64772214	1664	2202	0.954073	64772213	64772219	7	AAAATATGGCGAGTGTGTTT	1_+_227210	NM_001097644	+	'PA'	64772206	64772226	421	394	509	351	527	0.783985	0.799189	0.81051	0.873134	0.841853
1	75144461	75144498	906	37	75144481	483	876	0.966887	75144478	75144482	5	AACTGCTGCCTGTCTGCCTG	1_+_227298	NM_170755	+	'PA'	75144473	75144493	325	61	178	88	224	1	1	1	1	1
1	89347333	89347394	797	61	89347367	656	760	0.953576	89347347	89347370	24	AAAATGTGTTGTGGTCTCTC	1_+_227331	NM_001110212	+	'3'UTR'	89345721	89347385	253	77	141	81	208	0.893993	0.793814	0.903846	0.931034	0.892704
1	89252269	89252310	39	41	89252297	23	38	0.974359	89252277	89252301	25	ATTTAATAGTTTCATTGTAT	1_+_227331	NM_001110212	+	'intron'	89251062	89260678	3	13	8	1	13	0.0106007	0.134021	0.0512821	0.0114943	0.055794
1	89841740	89841766	32	26	89841754	11	32	1	89841751	89841758	8	CCTGTTTTGTCTATTCTGTT	1_+_227333	NM_177646	+	'extend_3'TUR'	89841065	89846064	8	2	8	3	11	0.0601504	0.0263158	0.0547945	0.0789474	0.112245
1	89841045	89841081	480	36	89841064	304	459	0.95625	89841062	89841068	7	AGTGAGCATTCCTGTCCTCA	1_+_227333	NM_177646	+	'PA'	89841054	89841074	125	74	138	35	87	0.93985	0.973684	0.945205	0.921053	0.887755
1	93270773	93270806	155	33	93270790	65	150	0.967742	93270788	93270793	6	ATGAGTTGGCATTCTCTGTC	1_+_227358	NM_173395	+	'PA'	93270784	93270804	33	15	54	21	27	1	1	1	1	1
1	95518343	95518378	151	35	95518358	75	144	0.953642	95518358	95518364	7	ACCCACCAGCATCCCCTTTG	1_+_227377	NM_145519	+	'3'UTR'	95517949	95518553	26	28	28	25	37	0.0875421	0.141414	0.120172	0.215517	0.134545
1	95484346	95484375	75	29	95484363	42	75	1	95484360	95484363	4	AAAAGAAAGGAAAGAAACAC	1_+_227377	NM_145519	+	'intron'	95476576	95496499	34	12	9	8	12	0.114478	0.0606061	0.0386266	0.0689655	0.0436364
1	95489851	95489896	945	45	95489872	609	900	0.952381	95489866	95489879	14	AATTTTTAAATGGGCTTTTT	1_+_227377	NM_145519	+	'intron'	95476576	95496499	237	158	196	83	226	0.79798	0.79798	0.841202	0.715517	0.821818
1	107650627	107650666	36	39	107650649	9	35	0.972222	107650636	107650659	24	ATGAAAGAATAATGCAGACT	1_+_227446	NM_173187	+	'3'UTR'	107650201	107651708	6	6	7	11	5	0.0377358	0.0638298	0.0443038	0.113402	0.0280899
1	107651677	107651717	597	40	107651695	160	568	0.951424	107651693	107651698	6	GTTTTTGCTGTGTATTTTGT	1_+_227446	NM_173187	+	'3'UTR'	107650201	107651708	131	75	125	76	161	0.823899	0.797872	0.791139	0.783505	0.904494
1	107651750	107651785	48	35	107651764	26	46	0.958333	107651763	107651772	10	AAAATACATTTTAGAAATCT	1_+_227446	NM_173187	+	'extend_3'TUR'	107651709	107656708	9	3	19	8	7	0.0566038	0.0319149	0.120253	0.0824742	0.0393258
1	107561712	107561739	38	27	107561727	24	37	0.973684	107561721	107561729	9	AGATGTGTCTGCTTCATAGA	1_+_227446	NM_173187	+	'intron'	107561211	107574739	13	10	7	2	5	0.081761	0.106383	0.0443038	0.0206186	0.0280899
1	107930615	107930665	537	50	107930644	211	512	0.953445	107930637	107930652	16	AGCCTAAGAATTATGCCTTA	1_+_227449	NM_001122676	+	'PA'	107930644	107930664	145	94	124	59	90	0.941558	0.94	0.976378	0.951613	0.978261
1	193733959	193733996	171	37	193733982	123	164	0.959064	193733980	193733982	3	AATTTCTCTGCTTTTCTTCC	1_+_22782	NM_009579	+	'3'UTR'	193733635	193737126	21	14	83	14	32	0.344262	0.16092	0.31203	0.179487	0.179775
1	193737044	193737080	242	36	193737066	120	232	0.958678	193737059	193737066	8	ACTACTGTGTTTCTTCTCAT	1_+_22782	NM_009579	+	'3'UTR'	193733635	193737126	19	27	83	32	71	0.311475	0.310345	0.31203	0.410256	0.398876
1	193737088	193737140	278	52	193737110	101	274	0.985612	193737102	193737128	27	AAACTAATTCTAATTTCTAT	1_+_22782	NM_009579	+	'3'UTR'	193733635	193737126	21	46	100	32	75	0.344262	0.528736	0.37594	0.410256	0.421348
1	63639465	63639501	196	36	63639484	160	188	0.959184	63639484	63639490	7	AACTTCAGAATCCTTTTTTT	1_+_23792	NM_011780	+	'3'UTR'	63639231	63643089	39	24	45	20	60	0.357798	0.40678	0.319149	0.294118	0.444444
1	63640530	63640571	94	41	63640545	66	92	0.978723	63640545	63640562	18	AAATGCTGGAAGCTTGGAAA	1_+_23792	NM_011780	+	'3'UTR'	63639231	63643089	26	6	19	10	31	0.238532	0.101695	0.134752	0.147059	0.22963
1	63642655	63642691	213	36	63642674	149	205	0.962441	63642673	63642677	5	AGGATGTTGTAGTTTTGTGC	1_+_23792	NM_011780	+	'3'UTR'	63639231	63643089	40	28	69	34	34	0.366972	0.474576	0.489362	0.5	0.251852
1	187180644	187180675	104	31	187180660	57	102	0.980769	187180657	187180664	8	ATCTAATACGCTTAAGACTT	1_+_23827	NM_011794	+	'3'UTR'	187180506	187181648	32	12	27	12	19	0.244275	0.0727273	0.156069	0.122449	0.162393
1	187181627	187181665	606	38	187181648	461	582	0.960396	187181647	187181650	4	AAAGCTGGGTAATTGCCTTT	1_+_23827	NM_011794	+	'PA'	187181638	187181658	99	153	146	86	98	0.755725	0.927273	0.843931	0.877551	0.837607
1	94837535	94837564	52	29	94837549	34	52	1	94837548	94837557	10	ACTGCCGGACCTGCTGTGGT	1_+_23830	NM_011796	+	'intron'	94837078	94839058	15	5	16	8	8	0.197368	0.208333	0.32	0.242424	0.16
1	94844495	94844541	190	46	94844517	120	181	0.952632	94844515	94844524	10	ATGGATTAGTCTTGTTCCAA	1_+_23830	NM_011796	+	'PA'	94844515	94844535	61	19	34	25	42	0.802632	0.791667	0.68	0.757576	0.84
1	106766092	106766119	46	27	106766106	30	44	0.956522	106766103	106766108	6	TTAAAAAATCCTATTGTAGC	1_+_23836	NM_011800	+	'intron'	106665476	106830533	9	1	4	6	24	1	1	1	1	1
1	155611334	155611363	44	29	155611350	28	42	0.954545	155611344	155611352	9	ACGTTGGATTTTCTGTCAGT	1_+_24014	NM_011882	+	'PA'	155611341	155611361	10	2	8	7	15	1	1	1	1	1
1	6788205	6788277	715	72	6788251	171	691	0.966434	6788243	6788263	21	AAAGAAAGAAAGACTACTCT	1_+_240690	NM_001244693	+	'intron'	6785658	6792400	313	66	66	96	150	1	1	1	1	1
1	12850961	12851002	551	41	12850979	267	524	0.950998	12850979	12850988	10	AAAACTTAATGTGGTGTAGT	1_+_240725	NM_001198566	+	'extend_3'TUR'	12850454	12855453	94	43	98	76	213	0.0763607	0.0953437	0.0852916	0.0931373	0.0776522
1	12851246	12851296	2062	50	12851272	1226	1981	0.960718	12851271	12851274	4	TTACTCGTTTCAGAGAAATG	1_+_240725	NM_001198566	+	'extend_3'TUR'	12850454	12855453	334	136	361	277	873	0.271324	0.301552	0.314186	0.339461	0.318265
1	12850418	12850474	3799	56	12850452	939	3717	0.978415	12850436	12850458	23	ACCGGCTCTCTCTGTGCTTG	1_+_240725	NM_001198566	+	'PA'	12850443	12850463	774	259	650	436	1598	0.628757	0.574279	0.565709	0.534314	0.582574
1	135005246	135005276	92	30	135005261	60	91	0.98913	135005259	135005265	7	AAACAAAGCTATCATTATTA	1_+_240752	NM_001099276	+	'PA'	135005255	135005275	28	17	18	2	26	1	1	1	1	1
1	136387583	136387606	21	23	136387595	16	21	1	136387595	136387598	4	AAATTTGTTGGATTTATTGT	1_+_240756	NM_153128	+	'extend_3'TUR'	136387451	136392450	1	4	5	4	7	0.0196078	0.129032	0.0819672	0.148148	0.104478
1	136387429	136387468	223	39	136387445	127	216	0.96861	136387445	136387455	11	AAATGGCTTTAAGAGAATTT	1_+_240756	NM_153128	+	'PA'	136387440	136387460	50	27	56	23	60	0.980392	0.870968	0.918033	0.851852	0.895522
1	157899906	157899947	1489	41	157899927	1107	1435	0.963734	157899926	157899929	4	ACATTGTTCTAATTTTCTCC	1_+_240832	NM_001160182	+	'3'UTR'	157899404	157900866	365	169	390	163	348	0.304167	0.307273	0.350404	0.366292	0.29769
1	157900634	157900678	2150	44	157900659	1583	2051	0.953953	157900658	157900661	4	ACTCAGCAGGTTTTATTGTT	1_+_240832	NM_001160182	+	'3'UTR'	157899404	157900866	534	278	481	187	571	0.445	0.505455	0.432165	0.420225	0.488452
1	157915924	157916006	934	82	157915987	223	912	0.976445	157915941	157915993	53	AAAATGGGTGTGCGGTTGTT	1_+_240832	NM_172843	+	'PA'	157915979	157915999	270	96	227	89	230	0.225	0.174545	0.203953	0.2	0.196749
1	165883862	165883893	56	31	165883881	32	54	0.964286	165883873	165883881	9	AATTTTGTGCCATTTCTTTA	1_+_240880	NM_001286003	+	'3'UTR'	165883570	165885257	19	5	9	4	17	0.148438	0.0862069	0.0849057	0.08	0.116438
1	165884130	165884163	168	33	165884147	127	161	0.958333	165884147	165884154	8	ACAAAAGCTCTTTTATGTGC	1_+_240880	NM_001286003	+	'3'UTR'	165883570	165885257	47	29	44	7	34	0.367188	0.5	0.415094	0.14	0.232877
1	165885225	165885269	279	44	165885241	105	273	0.978495	165885240	165885256	17	ACAATGGTTACAATTATTTC	1_+_240880	NM_001286003	+	'3'UTR'	165883570	165885257	62	24	53	39	95	0.484375	0.413793	0.5	0.78	0.650685
1	167256826	167256893	475	67	167256876	291	467	0.983158	167256840	167256878	39	TGTATCTGTGTAAATGGTCA	1_+_240888	NM_001081126	+	'extend_3'TUR'	167251983	167256982	159	74	86	38	110	1	1	1	1	1
1	173192357	173192415	492	58	173192387	226	476	0.96748	173192373	173192403	31	ATTGAGTTTAATGGCCACTT	1_+_240913	NM_172845	+	'extend_3'TUR'	173190054	173195053	151	40	79	44	162	0.73301	0.740741	0.617188	0.54321	0.736364
1	173190016	173190090	219	74	173190045	55	213	0.972603	173190030	173190078	49	AGCCTCTCACTCAGTAGGTG	1_+_240913	NM_172845	+	'PA'	173190043	173190063	55	14	49	37	58	0.26699	0.259259	0.382812	0.45679	0.263636
1	60210777	60210808	51	31	60210796	40	49	0.960784	60210792	60210798	7	ATGTGTTAGTTTTTGAAAAT	1_+_241066	NM_001285473	+	'PA'	60210787	60210807	9	8	10	7	15	1	1	1	1	1
1	74415881	74415908	41	27	74415895	35	39	0.95122	74415894	74415897	4	GCCAGGTGTGTTGGCTCAAC	1_+_241112	NM_001033345	+	'PA'	74415885	74415905	8	5	6	5	15	1	1	1	1	1
1	44201343	44201378	289	35	44201360	235	285	0.986159	44201360	44201366	7	AATCCTATGAATTTTAATGT	1_+_246229	NM_144558	+	'3'UTR'	44199988	44201616	93	37	59	24	72	1	1	1	1	1
1	99689325	99689355	94	30	99689342	59	92	0.978723	99689338	99689343	6	ATACCATGCGTAGAATTCAG	1_+_252876	NM_026250	+	'3'UTR'	99689149	99689548	20	24	20	6	22	0.416667	0.774194	0.434783	0.545455	0.44898
1	99674441	99674479	71	38	99674461	31	69	0.971831	99674460	99674469	10	AACTCTCAGCTTTTGTCCCT	1_+_252876	NM_026250	+	'intron'	99674097	99679503	20	4	21	4	20	0.416667	0.129032	0.456522	0.363636	0.408163
1	99689505	99689568	25	63	99689551	9	24	0.96	99689519	99689565	47	AAACTTTATCTGTGACATTG	1_+_252876	NM_026250	+	'PA'	99689538	99689558	8	3	5	1	7	0.166667	0.0967742	0.108696	0.0909091	0.142857
1	88502819	88502858	202	39	88502839	82	194	0.960396	88502830	88502841	12	CTTTTGTGTCAATATTTGTT	1_+_26895	NM_172974	+	'3'UTR'	88501792	88503075	72	22	31	22	47	0.679245	0.666667	0.645833	0.709677	0.626667
1	88503379	88503415	104	36	88503398	53	99	0.951923	88503391	88503404	14	ATTCCATATCCTCACTGAAG	1_+_26895	NM_172974	+	'extend_3'TUR'	88503076	88508075	34	11	17	9	28	0.320755	0.333333	0.354167	0.290323	0.373333
1	172215460	172215496	54	36	172215480	22	52	0.962963	172215471	172215484	14	AATTAATGCCTAAACTTTGA	1_+_26904	NM_012009	+	'3'UTR'	172214812	172215793	7	17	6	9	13	1	1	1	1	1
1	177838849	177838887	104	38	177838863	38	104	1	177838863	177838878	16	ATTTCTGGGAAGTTTAAATG	1_+_26909	NM_012012	+	'3'UTR'	177838697	177841527	6	47	31	9	11	1	1	1	1	1
1	180862966	180863023	505	57	180862983	254	490	0.970297	180862983	180862992	10	TTTCATGGCTCTTCTGGTAA	1_+_269152	NM_001161665	+	'PA'	180862978	180862998	197	61	135	45	52	0.933649	0.968254	0.957447	0.978261	0.928571
1	37467562	37467593	106	31	37467578	85	103	0.971698	37467575	37467583	9	AAACTGAGTCTCACTTGATT	1_+_269180	NM_001290797	+	'PA'	37467575	37467595	30	11	21	9	32	1	1	1	1	1
1	60388290	60388328	64	38	60388304	15	61	0.953125	60388302	60388316	15	AATAGAGATTTGAGAGATGT	1_+_269198	NM_173444	+	'3'UTR'	60387837	60391549	14	11	16	10	10	0.0748663	0.115789	0.128	0.126582	0.0492611
1	60388874	60388904	36	30	60388893	25	35	0.972222	60388892	60388893	2	AAAAATCCTTTTTCTTGATA	1_+_269198	NM_173444	+	'3'UTR'	60387837	60391549	6	3	2	11	13	0.0320856	0.0315789	0.016	0.139241	0.0640394
1	60395144	60395185	529	41	60395168	207	519	0.981096	60395161	60395171	11	ATTATTTGGTTTGTAGTTCT	1_+_269198	NM_173444	+	'extend_3'TUR'	60391550	60396549	143	64	94	53	165	0.764706	0.673684	0.752	0.670886	0.812808
1	60268891	60268922	52	31	60268909	35	51	0.980769	60268901	60268911	11	ATTTATTTGTCTGTTTGTGT	1_+_269198	NM_173444	+	'intron'	60263261	60274039	15	12	9	5	10	0.0802139	0.126316	0.072	0.0632911	0.0492611
1	74682603	74682628	24	25	74682616	13	24	1	74682614	74682620	7	ACTTATGATGACTTGAATCA	1_+_269209	NM_175031	+	'3'UTR'	74682433	74683467	8	4	6	1	5	0.222222	0.444444	0.3	0.0909091	0.227273
1	74683447	74683478	76	31	74683465	52	74	0.973684	74683460	74683466	7	AAAGATGAGTGTGATTATCT	1_+_269209	NM_175031	+	'PA'	74683457	74683477	28	5	14	10	17	0.777778	0.555556	0.7	0.909091	0.772727
1	40081773	40081830	1472	57	40081792	720	1411	0.95856	40081792	40081814	23	AGCTGGTGCTGTCTGGACTC	1_+_26921	NM_008696	+	'3'UTR'	40081558	40083155	376	154	382	179	320	0.299125	0.277978	0.364156	0.341603	0.309777
1	40083125	40083173	3022	48	40083150	1002	2886	0.954997	40083144	40083152	9	CTTCATGGCTTCATGGTCAT	1_+_26921	NM_008696	+	'PA'	40083145	40083165	828	388	651	336	683	0.658711	0.700361	0.620591	0.641221	0.661181
1	89124612	89124658	3132	46	89124637	2623	3019	0.963921	89124636	89124638	3	AGCTTGTCTCATGCTCTTGC	1_+_26987	NM_001039170	+	'3'UTR'	89124449	89125433	1021	398	706	263	631	0.871904	0.880531	0.831567	0.794562	0.824837
1	89136805	89136841	312	36	89136823	163	302	0.967949	89136823	89136828	6	AAGAGAGCAGGCTGTGGACT	1_+_26987	NM_023314	+	'3'UTR'	89134461	89137063	86	26	65	42	83	0.0734415	0.0575221	0.0765607	0.126888	0.108497
1	184061775	184061822	315	47	184061805	116	305	0.968254	184061789	184061805	17	AATTTGATGTTGGGCAAATA	1_+_27058	NM_012058	+	'3'UTR'	184061587	184062546	81	42	78	29	75	0.0734361	0.0679612	0.0614173	0.0438729	0.0648789
1	184061914	184061956	3758	42	184061935	2776	3588	0.954763	184061932	184061937	6	AGTGGTATGTTTCTTTTGGA	1_+_27058	NM_012058	+	'3'UTR'	184061587	184062546	784	483	948	514	859	0.710789	0.781553	0.746457	0.77761	0.74308
1	184062499	184062548	926	49	184062528	271	883	0.953564	184062513	184062531	19	AAGTTTTGGATTTCTTGTAT	1_+_27058	NM_012058	+	'3'UTR'	184061587	184062546	230	90	235	115	213	0.208522	0.145631	0.185039	0.173979	0.184256
1	59409401	59409572	311	171	59409520	58	296	0.951768	59409410	59409553	144	AAAGGAAGGAAGGAAGGAAG	1_+_271697	NM_001033373	+	'extend_3'TUR'	59409214	59414213	154	17	31	30	64	0.950617	0.809524	0.72093	0.789474	0.771084
1	59409820	59409847	32	27	59409836	23	31	0.96875	59409830	59409837	8	ACTTGCTTGGGACTATTTGT	1_+_271697	NM_001033373	+	'extend_3'TUR'	59409214	59414213	4	3	10	5	9	0.0246914	0.142857	0.232558	0.131579	0.108434
1	59412080	59412104	21	24	59412093	17	20	0.952381	59412090	59412095	6	AAAACATTGAAATTTTCCTT	1_+_271697	NM_001033373	+	'extend_3'TUR'	59409214	59414213	4	1	2	3	10	0.0246914	0.047619	0.0465116	0.0789474	0.120482
1	137665690	137665729	1775	39	137665710	1256	1716	0.966761	137665709	137665714	6	ACGCTGTCTACTGAGTGAAA	1_+_27280	NM_013750	+	'PA'	137665701	137665721	538	218	317	143	500	1	1	1	1	1
1	168323728	168323769	691	41	168323749	441	666	0.963821	168323747	168323750	4	AAACCCTTTTCCTGTTTATT	1_+_27878	NM_030245	+	'PA'	168323741	168323761	188	85	164	50	179	1	1	1	1	1
1	34501784	34501848	530	64	34501803	235	505	0.95283	34501800	34501825	26	AGCTAGCGTCTATTCCCTGC	1_+_27993	NM_178601	+	'3'UTR'	34501316	34502592	120	96	125	52	112	0.722892	0.685714	0.641026	0.722222	0.643678
1	34506141	34506171	58	30	34506155	24	58	1	34506154	34506162	9	ATGCCTGATCTGATTGTTCA	1_+_27993	NM_178601	+	'extend_3'TUR'	34502593	34507592	10	5	22	2	19	0.060241	0.0357143	0.112821	0.0277778	0.109195
1	34502561	34502605	193	44	34502592	75	184	0.953368	34502576	34502593	18	ATGTTTTTTGTTTGTTTTGA	1_+_27993	NM_178601	+	'PA'	34502582	34502602	36	39	48	18	43	0.216867	0.278571	0.246154	0.25	0.247126
1	179380874	179380908	395	34	179380893	195	378	0.956962	179380890	179380894	5	AATTCCTTGTGTGCTTTTTG	1_+_30928	NM_001012330	+	'PA'	179380887	179380907	83	63	90	53	89	1	1	1	1	1
1	7162685	7162722	341	37	7162706	212	329	0.964809	7162699	7162706	8	AAAAGAAAAGAAAATGTGCT	1_+_319263	NM_183028	+	'3'UTR'	7159964	7163709	173	28	65	21	42	0.277244	0.202899	0.171958	0.100962	0.0857143
1	7162801	7162840	1381	39	7162822	1034	1335	0.966691	7162821	7162825	5	ATTATCCAGTGGCCTGCCTC	1_+_319263	NM_183028	+	'3'UTR'	7159964	7163709	402	96	280	162	395	0.644231	0.695652	0.740741	0.778846	0.806122
1	7163689	7163724	155	35	7163707	95	149	0.96129	7163706	7163713	8	AATTATTTTTTTGAGGTGTT	1_+_319263	NM_183028	+	'PA'	7163699	7163719	36	13	33	24	43	0.0576923	0.0942029	0.0873016	0.115385	0.0877551
1	195002478	195002510	94	32	195002494	65	90	0.957447	195002493	195002499	7	AAATGTCCTGAAATCATTTG	1_+_319266	NM_001160360	+	'3'UTR'	195001328	195004026	25	16	15	15	19	0.657895	0.516129	0.625	0.483871	0.487179
1	195003854	195003902	75	48	195003871	20	73	0.973333	195003867	195003892	26	AAATAAGTTCTTCAGCACTG	1_+_319266	NM_001160360	+	'3'UTR'	195001328	195004026	13	15	9	16	20	0.342105	0.483871	0.375	0.516129	0.512821
1	172612896	172612936	1089	40	172612918	336	1036	0.951331	172612913	172612920	8	TTTCCCGGCTCATTTTCGTT	1_+_320078	NM_177068	+	'PA'	172612910	172612930	87	151	221	169	408	1	1	1	1	1
1	182354913	182354946	197	33	182354932	96	190	0.964467	182354928	182354932	5	ACTAGCTTGATGTGATCCTT	1_+_320404	NM_001081175	+	'extend_3'TUR'	182353791	182358790	76	22	26	13	53	1	1	1	1	1
1	60536529	60536564	157	35	60536544	89	155	0.987261	60536544	60536553	10	AAAGATGTCTCCTACAGTAT	1_+_329165	NM_001198571	+	'3'UTR'	60533760	60538007	39	30	33	14	39	0.176471	0.2	0.232394	0.153846	0.171806
1	60537975	60538018	674	43	60537999	353	650	0.964392	60537995	60538002	8	ATATTGCAGTGTCTTGTAGA	1_+_329165	NM_001198571	+	'PA'	60537997	60538017	177	111	104	75	183	0.800905	0.74	0.732394	0.824176	0.806167
1	91786282	91786367	274	85	91786345	72	261	0.952555	91786320	91786358	39	AAACGAAATCATGAATTCGG	1_+_347722	NM_001037136	+	'3'UTR'	91785470	91791857	88	30	59	27	57	0.235294	0.227273	0.188498	0.198529	0.210332
1	91786529	91786585	599	56	91786547	259	594	0.991653	91786547	91786573	27	AAATATGCATTGATTTTTGC	1_+_347722	NM_001037136	+	'3'UTR'	91785470	91791857	176	68	151	67	132	0.470588	0.515152	0.482428	0.492647	0.487085
1	91787511	91787560	174	49	91787528	98	169	0.971264	91787524	91787548	25	AAAACAAGCTGTCATTGCCT	1_+_347722	NM_001037136	+	'3'UTR'	91785470	91791857	47	20	57	20	25	0.125668	0.151515	0.182109	0.147059	0.0922509
1	91791828	91791870	210	42	91791852	131	202	0.961905	91791843	91791860	18	ATACAGTGCTTCTGTGGAGT	1_+_347722	NM_001037136	+	'PA'	91791847	91791867	63	14	46	22	57	0.168449	0.106061	0.146965	0.161765	0.210332
1	138426140	138426168	41	28	138426153	23	39	0.95122	138426152	138426155	4	AGAACCGCCTCCTAATCCAG	1_+_381293	NM_001287179	+	'3'UTR'	138424194	138428088	0	10	14	10	5	0	1	1	1	1
1	162898164	162898192	62	28	162898179	54	59	0.951613	162898176	162898180	5	AATGAACTTTATTTTAATAA	1_+_381305	NM_001024952	+	'3'UTR'	162897929	162905107	19	9	10	9	12	0.0544413	0.0666667	0.0552486	0.105882	0.0491803
1	162905085	162905122	809	37	162905104	423	790	0.976514	162905101	162905107	7	AGGAACAGTGTGTAGTCTTT	1_+_381305	NM_001024952	+	'PA'	162905097	162905117	276	106	137	64	207	0.790831	0.785185	0.756906	0.752941	0.848361
1	192908404	192908450	122	46	192908435	75	117	0.959016	192908429	192908441	13	AATTGCATTTTTACTGTATT	1_+_381318	NM_198654	+	'PA'	192908427	192908447	16	33	33	15	20	1	1	1	1	1
1	167704123	167704231	644	108	167704190	319	615	0.954969	167704136	167704196	61	ATTTTCAGAGAAAAATGCCA	1_+_433375	NM_011804	+	'3'UTR'	167703979	167705435	146	59	168	67	175	0.442424	0.678161	0.59364	0.609091	0.451031
1	167705415	167705452	611	37	167705433	363	583	0.954173	167705432	167705438	7	AACAAAGTGTGTTGGACTGA	1_+_433375	NM_011804	+	'PA'	167705425	167705445	184	28	115	43	213	0.557576	0.321839	0.40636	0.390909	0.548969
1	36163271	36163307	738	36	36163290	585	711	0.963415	36163289	36163291	3	ATTGTGTGCTGTGGTCTGTG	1_+_50785	NM_015818	+	'PA'	36163281	36163301	185	64	133	81	248	1	1	1	1	1
1	93217623	93217667	160	44	93217639	66	155	0.96875	93217638	93217657	20	AAACATGTCTGCACCTGCTG	1_+_50880	NM_016717	+	'3'UTR'	93216808	93217657	35	11	40	20	49	1	1	1	1	1
1	95592320	95592363	1106	43	95592339	739	1069	0.966546	95592338	95592346	9	AAGTGTGAGACTCTACTCTG	1_+_51800	NM_016778	+	'PA'	95592329	95592349	206	245	304	119	195	1	1	1	1	1
1	93120233	93120267	125	34	93120248	77	121	0.968	93120248	93120256	9	AAACCTGGGAAGTGTTCTGT	1_+_51801	NM_016894	+	'3'UTR'	93119939	93121773	21	9	54	8	29	1	1	1	1	1
1	75195941	75195984	112	43	75195958	63	107	0.955357	75195954	75195959	6	AAAACTGTGTGTGTACTTAC	1_+_52231	NR_051998	+	'PA'	75195950	75195970	33	7	17	10	40	1	1	1	1	1
1	192770823	192770869	180	46	192770840	98	171	0.95	192770837	192770844	8	ACTGTTGTGGACAGAGAAGT	1_+_52477	NM_001199020	+	'extend_3'TUR'	192770371	192775370	52	18	31	17	53	0.448276	0.310345	0.402597	0.459459	0.469027
1	192770355	192770395	240	40	192770372	143	230	0.958333	192770370	192770382	13	AAATTTTTACTCATTTATTC	1_+_52477	NM_001199020	+	'PA'	192770360	192770380	64	40	46	20	60	0.551724	0.689655	0.597403	0.540541	0.530973
1	39602205	39602265	904	60	39602224	448	868	0.960177	39602222	39602247	26	AAAGTAAAATTTCCTTTTTC	1_+_52846	NM_028043	+	'3'UTR'	39602112	39603722	248	114	203	96	207	1	1	1	1	1
1	164525041	164525072	116	31	164525057	95	111	0.956897	164525056	164525061	6	AAGTGAGAGTCAGTCTGGTG	1_+_53330	NM_016796	+	'intron'	164522809	164527179	27	11	26	17	30	0.109756	0.0859375	0.128079	0.131783	0.0906344
1	164525267	164525302	236	35	164525287	146	228	0.966102	164525282	164525288	7	AAAATACGTGGTAATTTTTT	1_+_53330	NM_016796	+	'intron'	164522809	164527179	43	32	66	23	64	0.174797	0.25	0.325123	0.178295	0.193353
1	164525372	164525417	362	45	164525401	243	347	0.958564	164525395	164525404	10	ATTGGAGTGTTTGAAAACGA	1_+_53330	NM_016796	+	'intron'	164522809	164527179	76	48	70	43	110	0.308943	0.375	0.344828	0.333333	0.332326
1	164529189	164529228	288	39	164529209	147	277	0.961806	164529203	164529215	13	AAAAGTAAGCACTGTGGCTT	1_+_53330	NM_016796	+	'PA'	164529199	164529219	86	27	27	33	104	0.349593	0.210938	0.133005	0.255814	0.314199
1	184906544	184906568	25	24	184906558	12	25	1	184906554	184906558	5	AATTCTGATTCCTTGGTTTC	1_+_53791	NM_016928	+	'extend_3'TUR'	184906176	184911175	1	0	3	2	19	1	0	1	1	1
1	72679685	72679724	432	39	72679704	376	411	0.951389	72679704	72679710	7	AAAAGCCTGTATTCCGTTTG	1_+_54380	NM_018817	+	'3'UTR'	72679629	72683364	117	49	74	35	136	0.928571	0.907407	0.91358	0.875	0.866242
1	72682213	72682242	49	29	72682227	27	47	0.959184	72682226	72682232	7	AAGAGAACTGGTTGCCTCAG	1_+_54380	NM_018817	+	'3'UTR'	72679629	72683364	9	5	7	5	21	0.0714286	0.0925926	0.0864198	0.125	0.133758
1	176752842	176752875	28	33	176752854	13	27	0.964286	176752854	176752870	17	AAAATATTTCTGTGTCAGCT	1_+_54418	NM_019445	+	'PA'	176752850	176752870	9	6	3	3	6	1	1	1	1	1
1	145653919	145653953	326	34	145653936	259	315	0.966258	145653936	145653939	4	ATCTTAATTGACTCAGTGCA	1_+_56207	NM_001159866	+	'3'UTR'	145653859	145654596	44	109	86	37	39	0.0696203	0.165906	0.120617	0.115625	0.0728972
1	145654038	145654096	2610	58	145654058	948	2514	0.963218	145654057	145654072	16	AAAAAGTGCTGGCTAAACTC	1_+_56207	NM_001159866	+	'3'UTR'	145653859	145654596	578	542	624	280	490	0.914557	0.824962	0.875175	0.875	0.915888
1	51242534	51242571	761	37	51242552	347	738	0.969777	51242550	51242557	8	ACAATATAGTTTTTTCTTTC	1_+_56363	NM_019790	+	'3'UTR'	51242326	51244114	224	83	99	87	245	0.687117	0.715517	0.673469	0.649254	0.731343
1	51242595	51242632	159	37	51242614	67	157	0.987421	51242609	51242621	13	AAATGGCATTCCTAAACTTG	1_+_56363	NM_019790	+	'3'UTR'	51242326	51244114	43	20	23	29	42	0.131902	0.172414	0.156463	0.216418	0.125373
1	166753545	166753591	188	46	166753562	84	180	0.957447	166753561	166753582	22	ATGTTTCTCCCTTTCAACAC	1_+_56429	NM_019759	+	'3'UTR'	166753368	166754397	106	21	8	10	35	0.119774	0.144828	0.0727273	0.178571	0.0877193
1	166754354	166754424	1470	70	166754398	448	1415	0.962585	166754392	166754402	11	CCATAAATATCAAAGGTCAA	1_+_56429	NM_019759	+	'PA'	166754387	166754407	779	124	102	46	364	0.880226	0.855172	0.927273	0.821429	0.912281
1	74334002	74334042	981	40	74334025	430	942	0.960245	74334018	74334025	8	AAAGGAGGCCAGGTTGAATT	1_+_56695	NM_025580	+	'PA'	74334017	74334037	268	91	204	99	280	0.914676	0.947917	0.990291	0.951923	0.965517
1	169298395	169298436	849	41	169298414	549	840	0.989399	169298414	169298422	9	AAACGCTGTGTTTTTCTGTC	1_+_56752	NM_019993	+	'3'UTR'	169297631	169298661	199	109	181	93	258	0.912844	0.923729	0.93299	0.877358	0.924731
1	75242246	75242282	462	36	75242265	303	446	0.965368	75242263	75242267	5	AACTCGGTGGCCTGTGTTCC	1_+_56812	NM_001159885	+	'PA'	75242257	75242277	150	42	87	53	114	1	1	1	1	1
1	173207008	173207047	230	39	173207024	135	229	0.995652	173207024	173207037	14	ACCTTTGCTTGTGATTTCTG	1_+_57370	NM_020579	+	'PA'	173207016	173207036	62	32	61	21	53	1	1	1	1	1
1	78816582	78816619	162	37	78816599	63	158	0.975309	78816596	78816608	13	AGAAGCCACATTTCTTTGAT	1_+_57814	NM_021342	+	'PA'	78816590	78816610	28	19	40	21	50	1	1	1	1	1
1	74576010	74576055	164	45	74576030	102	156	0.95122	74576022	74576036	15	ATCCCCTCTGACAGACCGAT	1_+_58184	NM_021383	+	'3'UTR'	74575429	74577416	41	30	37	13	35	0.267974	0.29703	0.313559	0.25	0.263158
1	74577388	74577436	422	48	74577408	88	401	0.950237	74577402	74577415	14	TTTGTTTTGTTTTGTTTTGT	1_+_58184	NM_021383	+	'PA'	74577406	74577426	112	71	81	39	98	0.732026	0.70297	0.686441	0.75	0.736842
1	157049813	157049845	122	32	157049831	97	117	0.959016	157049828	157049833	6	AGCACCTGTGTCGGTCTAGC	1_+_58244	NM_021433	+	'3'UTR'	157049147	157050647	50	14	25	12	16	0.314465	0.181818	0.247525	0.196721	0.16
1	157050941	157050972	111	31	157050958	95	106	0.954955	157050958	157050962	5	AATGTGGGCCTTGTCTGAGT	1_+_58244	NM_021433	+	'extend_3'TUR'	157050648	157055647	29	16	23	15	23	0.18239	0.207792	0.227723	0.245902	0.23
1	157052768	157052799	36	31	157052787	30	35	0.972222	157052774	157052787	14	AAAGGATGAGATTGGTCTGC	1_+_58244	NM_021433	+	'extend_3'TUR'	157050648	157055647	15	4	6	3	7	0.0943396	0.0519481	0.0594059	0.0491803	0.07
1	157050627	157050666	252	39	157050648	172	240	0.952381	157050644	157050654	11	AAAAGAAGGGTATTTTATCT	1_+_58244	NM_021433	+	'PA'	157050637	157050657	65	43	47	31	54	0.408805	0.558442	0.465347	0.508197	0.54
1	9537512	9537553	1237	41	9537531	590	1187	0.95958	9537529	9537537	9	AATTAGTATTTGCATTATTT	1_+_59014	NM_021511	+	'PA'	9537526	9537546	207	287	379	110	204	1	1	1	1	1
1	6385013	6385057	218	44	6385031	108	208	0.954128	6385030	6385035	6	ATATGTGTGCCAGGGAGTGA	1_+_620393	NM_001195732	+	'extend_3'TUR'	6384813	6389812	7	20	60	33	88	0.636364	0.833333	0.8	0.559322	0.838095
1	6385085	6385126	48	41	6385109	17	46	0.958333	6385095	6385110	16	GATGCATTTAATTACCTTCA	1_+_620393	NM_001195732	+	'extend_3'TUR'	6384813	6389812	4	1	8	21	12	0.363636	0.0416667	0.106667	0.355932	0.114286
1	6385192	6385216	20	24	6385207	8	20	1	6385202	6385207	6	AGATGCTGTCTATGTGTTAT	1_+_620393	NM_001195732	+	'extend_3'TUR'	6384813	6389812	0	3	7	5	5	0	0.125	0.0933333	0.0847458	0.047619
1	37933052	37933096	229	44	37933070	196	222	0.969432	37933065	37933071	7	AAACTGTGTCCTTTTCCTTA	1_+_623661	NM_001037918	+	'3'UTR'	37932832	37933143	73	40	52	19	38	1	1	1	1	1
1	118328805	118328833	58	28	118328820	38	58	1	118328818	118328823	6	ACTACTACTGTAGCGGAAAA	1_+_636808	NM_001077425	+	'intron'	118325529	118338761	27	10	11	3	7	1	1	1	1	1
1	153569047	153569086	1028	39	153569068	436	1000	0.972763	153569064	153569071	8	ATTCACAGTTGCTCATTTAT	1_+_63913	NM_022018	+	'extend_3'TUR'	153566478	153571477	142	36	240	113	469	0.455128	0.444444	0.503145	0.472803	0.536613
1	153566452	153566501	931	49	153566472	463	887	0.952739	153566469	153566481	13	AAAGACTTTACCAATGTAGA	1_+_63913	NM_022018	+	'PA'	153566467	153566487	152	41	219	116	359	0.487179	0.506173	0.459119	0.485356	0.410755
1	185898734	185898779	237	45	185898757	115	230	0.970464	185898749	185898767	19	TTTCTTCCCAGTTTCCCTTG	1_+_63953	NM_022019	+	'3'UTR'	185898403	185899515	36	66	42	52	34	1	1	1	1	1
1	94881608	94881632	20	24	94881620	9	20	1	94881620	94881623	4	ACACGTGTGTGCCTATGGTT	1_+_64095	NM_001271766	+	'3'UTR'	94880069	94882968	4	3	4	3	6	1	1	1	1	1
1	162129923	162129967	1900	44	162129948	1417	1807	0.951053	162129947	162129952	6	AAAGTATGGTCTTTCCTTCA	1_+_64659	NM_025474	+	'3'UTR'	162129742	162131317	401	242	493	205	466	0.617874	0.630208	0.702279	0.638629	0.624665
1	162130179	162130236	1014	57	162130199	537	967	0.953649	162130195	162130208	14	AGTTGTTTCATCTTTTAAAT	1_+_64659	NM_025474	+	'3'UTR'	162129742	162131317	239	139	203	111	275	0.368259	0.361979	0.289174	0.345794	0.368633
1	58518348	58518384	911	36	58518367	699	866	0.950604	58518366	58518368	3	AATTTTTGTTTTGTTTCTTG	1_+_65102	NM_022988	+	'3'UTR'	58518170	58519120	246	126	215	79	200	0.647368	0.741176	0.757042	0.675214	0.660066
1	58519095	58519143	349	48	58519119	230	339	0.971347	58519108	58519119	12	ACACACTGTATTTCTCTATG	1_+_65102	NM_022988	+	'PA'	58519110	58519130	119	40	56	31	93	0.313158	0.235294	0.197183	0.264957	0.306931
1	93455523	93455549	46	26	93455537	37	44	0.956522	93455536	93455538	3	ATTTCCTTCCCACATGCCTT	1_+_65247	NM_023046	+	'3'UTR'	93451456	93456167	10	7	13	6	8	0.107527	0.205882	0.213115	0.171429	0.08
1	93456139	93456185	288	46	93456166	131	279	0.96875	93456160	93456168	9	AGTGTCTGGCTCTCTAGCTC	1_+_65247	NM_023046	+	'PA'	93456157	93456177	83	27	48	29	92	0.892473	0.794118	0.786885	0.828571	0.92
1	84897044	84897074	73	30	84897059	49	71	0.972603	84897059	84897062	4	AGGCTTGTGTTCTGGTTTGT	1_+_66153	NM_025386	+	'PA'	84897051	84897071	18	2	12	6	33	1	1	1	1	1
1	137930922	137930951	54	29	137930935	22	54	1	137930935	137930941	7	AACGAGGGAGTGTGATTGGG	1_+_66241	NM_001160146	+	'3'UTR'	137930798	137931607	13	2	15	3	21	0.0331633	0.0289855	0.127119	0.0483871	0.0758123
1	137931575	137931624	895	49	137931603	501	864	0.965363	137931603	137931607	5	AAGAGTTGCAGATCTCAAGG	1_+_66241	NM_001160146	+	'PA'	137931597	137931617	379	67	103	59	256	0.966837	0.971014	0.872881	0.951613	0.924188
1	95718656	95718691	300	35	95718675	151	292	0.973333	95718672	95718679	8	AAACATTTGAAAGTAGATCA	1_+_66262	NM_025454	+	'PA'	95718667	95718687	43	56	81	31	81	1	1	1	1	1
1	180252793	180252841	2041	48	180252818	629	1981	0.970603	180252814	180252825	12	AAACTGTATTGTTTTACATG	1_+_66359	NM_025511	+	'PA'	180252814	180252834	587	196	396	210	592	0.988215	0.970297	0.968215	0.981308	0.975288
1	58652738	58652821	3409	83	58652766	1113	3267	0.958346	58652764	58652806	43	TGTTTTTGTAACTCTTAAAT	1_+_66495	NM_025597	+	'3'UTR'	58652650	58652792	793	436	699	407	932	1	1	1	1	1
1	95684738	95684775	479	37	95684756	328	457	0.954071	95684753	95684761	9	AACAAAGACATGAATTTCTG	1_+_66615	NM_174874	+	'3'UTR'	95684337	95686106	169	49	78	28	133	0.662745	0.742424	0.735849	0.717949	0.707447
1	95685988	95686023	206	35	95686008	140	197	0.956311	95686003	95686010	8	AAAGTCTTGTGTGTGTGTGT	1_+_66615	NM_174874	+	'3'UTR'	95684337	95686106	86	17	28	11	55	0.337255	0.257576	0.264151	0.282051	0.292553
1	66764971	66765008	293	37	66764991	199	279	0.952218	66764984	66764995	12	AATGTATGAAGCCTAGGGTT	1_+_66646	NM_025683	+	'3'UTR'	66764451	66766379	84	31	73	26	65	0.188764	0.127049	0.165533	0.106557	0.131313
1	66766060	66766102	1435	42	66766082	907	1380	0.961672	66766079	66766086	8	AAGCAAAAGTTTGTAAGTAT	1_+_66646	NM_025683	+	'3'UTR'	66764451	66766379	312	183	316	190	379	0.701124	0.75	0.716553	0.778689	0.765657
1	74638680	74638710	111	30	74638696	91	107	0.963964	74638695	74638698	4	AATCAGGCTTGTGCCTTTCC	1_+_66821	NM_025784	+	'3'UTR'	74638646	74639017	22	11	16	13	45	0.318841	0.392857	0.372093	0.5	0.616438
1	74638748	74638788	135	40	74638762	32	132	0.977778	74638760	74638778	19	AGCAGGTACCTACAAGATCT	1_+_66821	NM_025784	+	'3'UTR'	74638646	74639017	47	17	27	13	28	0.681159	0.607143	0.627907	0.5	0.383562
1	58462246	58462356	2334	110	58462324	952	2218	0.9503	58462318	58462343	26	ATTCAAAGTCTCAAAGGGCA	1_+_66882	NM_025824	+	'3'UTR'	58461911	58463392	504	394	583	298	439	0.1653	0.212973	0.198569	0.205659	0.150394
1	58464172	58464216	5179	44	58464197	2994	5012	0.967754	58464190	58464198	9	ACGTACTGTGTCTGTGCTTT	1_+_66882	NM_025824	+	'extend_3'TUR'	58463393	58468392	1341	651	1041	564	1415	0.439816	0.351892	0.354564	0.389234	0.484755
1	58463339	58463421	4693	82	58463392	1797	4521	0.96335	58463392	58463405	14	ATTTAGGTTTTATAGATCAG	1_+_66882	NM_025824	+	'PA'	58463382	58463402	1059	745	1214	535	968	0.347327	0.402703	0.413488	0.36922	0.33162
1	193174064	193174093	67	29	193174079	45	64	0.955224	193174078	193174080	3	AGATTTGACTTTTTTGTTTT	1_+_66950	NM_025864	+	'3'UTR'	193173730	193176804	17	6	19	11	11	0.253731	0.166667	0.339286	0.323529	0.180328
1	193174776	193174807	76	31	193174794	38	73	0.960526	193174789	193174794	6	ATTCCTGCTACCTTTGTCTC	1_+_66950	NM_025864	+	'3'UTR'	193173730	193176804	25	7	13	11	17	0.373134	0.194444	0.232143	0.323529	0.278689
1	193175142	193175175	123	33	193175161	106	117	0.95122	193175154	193175162	9	AACCCTGTGTTTTGTTTTGT	1_+_66950	NM_025864	+	'3'UTR'	193173730	193176804	25	23	24	12	33	0.373134	0.638889	0.428571	0.352941	0.540984
1	153669158	153669239	1558	81	153669179	404	1492	0.957638	153669178	153669200	23	CTGGTCTAGTTTTAAATTTC	1_+_66967	NM_001039644	+	'3'UTR'	153665844	153669458	505	176	271	149	391	0.848739	0.830189	0.821212	0.760204	0.85
1	153669431	153669474	295	43	153669458	118	281	0.952542	153669446	153669459	14	AAAAGTAGGTTCATTAGTCC	1_+_66967	NM_001039644	+	'PA'	153669448	153669468	78	35	56	44	68	0.131092	0.165094	0.169697	0.22449	0.147826
1	136870721	136870761	138	40	136870737	106	133	0.963768	136870735	136870741	7	AAGTGTGTGTTTATATGAAA	1_+_67196	NM_001278115	+	'3'UTR'	136870524	136870756	13	61	23	19	17	1	1	1	1	1
1	58003791	58003825	349	34	58003808	298	336	0.962751	58003807	58003811	5	ACACCTGGCTTGCTCTTTCT	1_+_67198	NM_001164566	+	'3'UTR'	58003308	58005241	128	18	43	38	109	0.512	0.486486	0.716667	0.690909	0.633721
1	57939574	57939604	53	30	57939589	36	52	0.981132	57939587	57939596	10	AAAGAAGAAGGTAAGATTAA	1_+_67198	NM_001164566	+	'exon'	57939550	57939599	44	2	3	1	2	0.176	0.0540541	0.05	0.0181818	0.0116279
1	58005221	58005256	191	35	58005238	57	186	0.973822	58005233	58005242	10	TTCACGTCTGTAGAACCGTT	1_+_67198	NM_001164566	+	'PA'	58005231	58005251	78	17	14	16	61	0.312	0.459459	0.233333	0.290909	0.354651
1	163901732	163901802	1515	70	163901754	962	1440	0.950495	163901753	163901756	4	ATTGCATTGTCTAGTATTTT	1_+_67292	NM_026078	+	'3'UTR'	163901476	163903566	493	125	204	119	499	1	1	1	1	1
1	171902500	171902538	43	38	171902526	20	41	0.953488	171902509	171902527	19	ACCACGTTCCATTCCTTTTT	1_+_67303	NR_040438	+	'PA'	171902517	171902537	13	10	7	4	7	1	1	1	1	1
1	37495785	37495848	2871	63	37495829	2213	2746	0.956461	37495828	37495831	4	AAAGCTGTGACTGTTTATTT	1_+_67387	NM_026123	+	'3'UTR'	37495664	37495969	937	252	459	308	790	1	1	1	1	1
1	94804992	94805024	53	32	94805008	34	51	0.962264	94805004	94805016	13	AAAACCCCCGAGTTGCTCTT	1_+_67446	NM_175118	+	'3'UTR'	94804265	94805197	16	4	12	10	9	1	1	1	1	1
1	74748371	74748417	245	46	74748399	195	233	0.95102	74748383	74748405	23	AACTTTTTTTCAGTGTTGGG	1_+_67534	NM_001014974	+	'extend_3'TUR'	74744548	74749547	32	57	56	30	58	0.52459	0.934426	0.875	0.833333	0.74359
1	74744531	74744561	69	30	74744546	53	67	0.971014	74744546	74744552	7	ACACTGAGAGCCATGTGTGA	1_+_67534	NM_001014974	+	'PA'	74744537	74744557	29	4	8	6	20	0.47541	0.0655738	0.125	0.166667	0.25641
1	174308693	174308768	163	75	174308711	55	156	0.957055	174308705	174308753	49	ATCCACTGTAGACCTGAGTT	1_+_67556	NM_026234	+	'3'UTR'	174308102	174314230	35	24	44	20	33	0.0933333	0.129032	0.131737	0.108108	0.0990991
1	174309117	174309197	937	80	174309174	458	922	0.983991	174309146	174309183	38	AAAACATAGAGCCTGTCTGT	1_+_67556	NM_026234	+	'3'UTR'	174308102	174314230	260	116	209	131	206	0.693333	0.623656	0.625749	0.708108	0.618619
1	174312918	174312947	91	29	174312933	47	88	0.967033	174312932	174312936	5	TTTCTAAGTGTCCTTTTTTC	1_+_67556	NM_026234	+	'3'UTR'	174308102	174314230	26	10	10	7	35	0.0693333	0.0537634	0.0299401	0.0378378	0.105105
1	162005966	162006007	52	41	162005991	28	50	0.961538	162005973	162005992	20	AAATGTGTTATGAGAAGATA	1_+_67647	NM_001162896	+	'3'UTR'	162005593	162008717	12	4	10	5	19	0.387097	0.105263	0.181818	0.208333	0.22093
1	162008695	162008730	193	35	162008715	159	184	0.953368	162008714	162008719	6	AAATCCTCCTCGCACGTTGG	1_+_67647	NM_001162896	+	'PA'	162008707	162008727	19	34	45	19	67	0.612903	0.894737	0.818182	0.791667	0.77907
1	97230918	97230975	293	57	97230935	208	280	0.955631	97230934	97230939	6	AAACTTTTTCCCGTTTTTAT	1_+_67698	NM_026321	+	'3'UTR'	97230517	97231861	68	32	62	29	89	0.304933	0.333333	0.427586	0.47541	0.406393
1	97231015	97231065	252	50	97231050	221	240	0.952381	97231050	97231053	4	ATTTAAGTGGTACAGATAGA	1_+_67698	NM_026321	+	'3'UTR'	97230517	97231861	76	33	39	16	76	0.340807	0.34375	0.268966	0.262295	0.347032
1	97231087	97231121	157	34	97231102	73	150	0.955414	97231102	97231109	8	ATATTAACATGTGTTTTATA	1_+_67698	NM_026321	+	'3'UTR'	97230517	97231861	56	24	34	9	27	0.251121	0.25	0.234483	0.147541	0.123288
1	189173510	189173537	23	27	189173528	7	22	0.956522	189173521	189173528	8	AGAATGGCTCCTTTGCTTCA	1_+_67769	NM_026367	+	'3'UTR'	189172457	189175308	13	3	3	0	3	0.134021	0.0857143	0.0483871	0	0.0394737
1	189174589	189174616	33	27	189174604	28	32	0.969697	189174599	189174605	7	AGTTCATGGTGCCCACATCA	1_+_67769	NM_026367	+	'3'UTR'	189172457	189175308	14	1	10	0	7	0.14433	0.0285714	0.16129	0	0.0921053
1	189175557	189175596	179	39	189175574	89	174	0.972067	189175573	189175586	14	ATTTCTAAAGCCGTTGTTGG	1_+_67769	NM_026367	+	'extend_3'TUR'	189175309	189180308	58	20	30	15	51	0.597938	0.571429	0.483871	0.714286	0.671053
1	189062590	189062634	66	44	189062619	32	63	0.954545	189062607	189062626	20	AAAAAGAATGTGGTGGAGTT	1_+_67769	NM_026367	+	'intron'	189057706	189128208	12	11	19	6	15	0.123711	0.314286	0.306452	0.285714	0.197368
1	154622666	154622736	8549	70	154622708	3806	8181	0.956954	154622685	154622710	26	AATTTTTTTCTTAATTGAAT	1_+_67771	NM_026369	+	'PA'	154622700	154622720	1870	1765	1980	851	1715	0.884161	0.908389	0.892294	0.907249	0.884477
1	130174305	130174343	134	38	130174322	58	133	0.992537	130174320	130174333	14	TGTCCTAGGTTACTGATGCA	1_+_67812	NM_026390	+	'3'UTR'	130173673	130175954	35	17	28	17	36	0.105422	0.147826	0.118143	0.125926	0.100279
1	130146789	130146842	170	53	130146827	48	163	0.958824	130146803	130146827	25	AAAAGGAAAAAAAAAGATCT	1_+_67812	NM_026390	+	'intron'	130141130	130148779	51	13	22	23	54	0.153614	0.113043	0.092827	0.17037	0.150418
1	130175931	130175971	847	40	130175951	378	818	0.965762	130175947	130175954	8	ACTACCCTGCATTTTGCTCT	1_+_67812	NM_026390	+	'PA'	130175944	130175964	218	78	176	91	255	0.656627	0.678261	0.742616	0.674074	0.710306
1	55129094	55129162	916	68	55129122	440	883	0.963974	55129117	55129132	16	ATTGCTAATGAAGTCTTAGC	1_+_67876	NM_001039710	+	'3'UTR'	55128648	55129546	264	143	190	87	199	0.515625	0.359296	0.374016	0.379913	0.403651
1	55129513	55129565	1247	52	55129545	500	1200	0.96231	55129531	55129545	15	ACCTTGGTTATTTAAATCTT	1_+_67876	NM_001039710	+	'PA'	55129536	55129556	230	247	310	137	276	0.449219	0.620603	0.610236	0.598253	0.559838
1	93182115	93182157	128	42	93182143	86	123	0.960938	93182133	93182145	13	AAGAGAGTTGTCTGCTTCCC	1_+_67921	NM_026454	+	'3'UTR'	93181933	93182602	18	22	38	13	32	0.0372671	0.0647059	0.0737864	0.0572687	0.067086
1	93182331	93182377	557	46	93182359	185	533	0.956912	93182348	93182362	15	ACACTCTCTTAGCTTCTTCC	1_+_67921	NM_026454	+	'3'UTR'	93181933	93182602	137	84	134	52	126	0.283644	0.247059	0.260194	0.229075	0.264151
1	93182460	93182548	1068	88	93182487	359	1044	0.977528	93182482	93182534	53	ATTTGTAATTTGTACAATTT	1_+_67921	NM_026454	+	'3'UTR'	93181933	93182602	227	190	272	117	238	0.469979	0.558824	0.528155	0.515419	0.498952
1	120230138	120230184	1523	46	120230166	1114	1464	0.961261	120230163	120230168	6	ATTAAGCTTCCTTTTTGTCC	1_+_67949	NM_026472	+	'3'UTR'	120229519	120230408	309	237	399	171	348	0.85124	0.890977	0.867391	0.859296	0.908616
1	120230386	120230421	151	35	120230401	68	151	1	120230400	120230408	9	AAGTGGGACTTTTTTTAAAT	1_+_67949	NM_026472	+	'PA'	120230398	120230418	23	24	52	24	28	0.0633609	0.0902256	0.113043	0.120603	0.073107
1	138336668	138336704	101	36	138336683	45	99	0.980198	138336682	138336695	14	ACAGAAGACTCTATAAGATC	1_+_67997	NM_026500	+	'3'UTR'	138336594	138336797	26	23	13	12	25	0.167742	0.221154	0.104	0.137931	0.178571
1	138336713	138336751	501	38	138336731	388	486	0.97006	138336730	138336734	5	AATATCGTTATTTATTTCAG	1_+_67997	NM_026500	+	'3'UTR'	138336594	138336797	120	78	104	72	112	0.774194	0.75	0.832	0.827586	0.8
1	57472728	57472765	688	37	57472748	564	656	0.953488	57472748	57472751	4	AGATTGCTAGTGTTCTTTAA	1_+_68115	NM_001081181	+	'3'UTR'	57472579	57472802	153	101	176	81	145	1	1	1	1	1
1	24819855	24819920	1179	65	24819876	499	1134	0.961832	24819871	24819879	9	ACATTCCCTTTGTTGCTTTT	1_+_68421	NM_026719	+	'3'UTR'	24819582	24823146	326	133	258	126	291	0.567944	0.658416	0.641791	0.741176	0.642384
1	24820393	24820440	256	47	24820409	110	251	0.980469	24820408	24820417	10	AATGTCAGCTAGGACTTATT	1_+_68421	NM_026719	+	'3'UTR'	24819582	24823146	107	24	53	19	48	0.186411	0.118812	0.131841	0.111765	0.10596
1	24823123	24823159	250	36	24823144	132	240	0.96	24823138	24823145	8	AAGTGTTTGAGTTGATGTTT	1_+_68421	NM_026719	+	'PA'	24823136	24823156	82	18	52	12	76	0.142857	0.0891089	0.129353	0.0705882	0.16777
1	58081851	58081887	50	36	58081868	26	48	0.96	58081862	58081878	17	ATTGGTCATCACATAACTTG	1_+_68549	NM_001177867	+	'3'UTR'	58081644	58082741	7	28	8	2	3	0.318182	0.424242	0.222222	0.166667	0.130435
1	58082716	58082755	116	39	58082742	48	111	0.956897	58082738	58082742	5	ATTTATCTATCTATTTATTT	1_+_68549	NM_001177867	+	'PA'	58082731	58082751	15	38	28	10	20	0.681818	0.575758	0.777778	0.833333	0.869565
1	137052814	137052865	4128	51	137052844	1503	3957	0.958576	137052842	137052848	7	GGGGGGTGTGTATGGTGCTG	1_+_68724	NM_026823	+	'PA'	137052835	137052855	1128	445	906	627	851	1	1	1	1	1
1	75168178	75168214	322	36	75168196	192	309	0.959627	75168193	75168201	9	AAGATGTATGAGTGCTGTTT	1_+_68818	NM_001159906	+	'PA'	75168190	75168210	89	26	66	28	100	1	1	1	1	1
1	39053244	39053363	147	119	39053264	38	140	0.952381	39053257	39053343	87	AATCATTGCTGAACTTTTTT	1_+_68833	NM_026850	+	'3'UTR'	39053129	39054081	28	21	49	24	18	0.4	0.456522	0.49	0.6	0.28125
1	39054066	39054099	187	33	39054083	148	180	0.962567	39054081	39054083	3	ATTTTATTGTAAGATTTATT	1_+_68833	NM_026850	+	'PA'	39054071	39054091	42	25	51	16	46	0.6	0.543478	0.51	0.4	0.71875
1	169260894	169260934	2885	40	169260916	1510	2782	0.964298	169260913	169260918	6	AGCCTTGTCTCCTGTTCAAA	1_+_68944	NM_001039483	+	'3'UTR'	169260397	169264109	724	362	659	329	708	1	1	1	1	1
1	182838065	182838100	274	35	182838085	144	261	0.952555	182838080	182838085	6	AAGCCTGTGTCTTGGTGTTG	1_+_69051	NM_133705	+	'3'UTR'	182837774	182838219	87	31	67	22	54	0.175758	0.113553	0.181572	0.139241	0.154286
1	182838197	182838238	1450	41	182838218	1173	1384	0.954483	182838216	182838221	6	AGTTCTAGTCTCACTGTGTA	1_+_69051	NM_133705	+	'PA'	182838209	182838229	408	242	302	136	296	0.824242	0.886447	0.818428	0.860759	0.845714
1	75439729	75439766	878	37	75439748	371	841	0.957859	75439747	75439753	7	GAGCCAGCTTGGACTCCTAC	1_+_69080	NM_133708	+	'PA'	75439741	75439761	208	89	193	75	276	1	1	1	1	1
1	79777999	79778037	773	38	79778019	585	737	0.953428	79778018	79778022	5	AGATGTCTTTCCTTTCTTTA	1_+_69163	NM_001081210	+	'PA'	79778010	79778030	164	120	161	100	192	1	1	1	1	1
1	145593864	145593924	2077	60	145593905	1165	1977	0.951854	145593902	145593912	11	ATCTCCCGATTGGCCAGTTT	1_+_69367	NM_023505	+	'3'UTR'	145593770	145596808	477	151	512	250	587	0.97546	0.937888	0.984615	0.996016	0.984899
1	42962497	42962559	988	62	42962527	714	942	0.953441	42962526	42962529	4	ATTCGCCCTTTTTTTTTAAA	1_+_69527	NM_023514	+	'PA'	42962518	42962538	282	117	230	108	205	1	1	1	1	1
1	159350323	159350382	819	59	159350364	611	781	0.953602	159350363	159350368	6	AACTTTGCTGGCCCAGTGTC	1_+_69953	NR_027984	+	'PA'	159350357	159350377	155	104	185	109	228	1	1	1	1	1
1	165927356	165927385	91	29	165927372	48	91	1	165927370	165927373	4	AATTTGTGACTGTTCAATTT	1_+_69962	NM_027279	+	'PA'	165927364	165927384	24	11	27	11	18	1	1	1	1	1
1	88035840	88035890	4247	50	88035860	1152	4075	0.959501	88035860	88035872	13	CACATTGACCAGACTTTAGT	1_+_70247	NM_027357	+	'PA'	88035860	88035880	978	619	1002	535	941	1	1	1	1	1
1	16667875	16667940	1861	65	16667895	763	1811	0.973133	16667895	16667921	27	AAATATGTAAAATGTGGATG	1_+_70397	NM_027415	+	'3'UTR'	16667507	16668356	447	270	418	226	450	0.760204	0.676692	0.636225	0.691131	0.645624
1	16668245	16668299	792	54	16668278	287	760	0.959596	16668274	16668285	12	ACCCAGTATGTGTTTGTTTG	1_+_70397	NM_027415	+	'3'UTR'	16667507	16668356	124	114	220	84	218	0.210884	0.285714	0.334855	0.256881	0.312769
1	163016438	163016482	259	44	163016457	47	248	0.957529	163016450	163016468	19	TGGTGTTTCCAATTGAAGTT	1_+_70454	NM_001159930	+	'3'UTR'	163016191	163016474	42	74	54	32	46	1	1	1	1	1
1	167411215	167411275	5302	60	167411250	3527	5079	0.95794	167411247	167411252	6	AGTCTGTCTTTACATTTGCC	1_+_70456	NM_027430	+	'3'UTR'	167411071	167411345	1647	543	1055	476	1358	0.979191	0.985481	0.977757	0.985507	0.986919
1	44853653	44853717	2260	64	44853675	1220	2158	0.954867	44853675	44853685	11	AAATTAAACTGTATGATATG	1_+_70676	NM_028450	+	'PA'	44853671	44853691	600	249	515	219	575	0.963082	0.965116	0.966229	0.969027	0.987973
1	93258968	93259003	83	35	93258983	48	81	0.975904	93258982	93258994	13	TGTGAGCAGCATGCTCTGTC	1_+_70788	NM_027551	+	'PA'	93258971	93258991	31	5	26	9	10	1	1	1	1	1
1	123398150	123398188	238	38	123398168	151	231	0.970588	123398165	123398171	7	AAGTATTGAGCAACTGCTAA	1_+_70829	NM_001025156	+	'3'UTR'	123397821	123403037	70	29	59	31	42	0.362694	0.386667	0.322404	0.43662	0.216495
1	123403016	123403072	502	56	123403035	428	485	0.966135	123403033	123403039	7	AATTTGGTTTCATTTAAGAA	1_+_70829	NM_001025156	+	'PA'	123403027	123403047	123	46	124	40	152	0.637306	0.613333	0.677596	0.56338	0.783505
1	127770421	127770457	99	36	127770436	82	98	0.989899	127770436	127770449	14	AAAGTCTCCCCTCACCACTC	1_+_71111	NM_027677	+	'PA'	127770428	127770448	18	9	23	8	40	1	1	1	1	1
1	36793053	36793100	29	47	36793088	7	28	0.965517	36793061	36793094	34	TGGTAGGAAGAAAACTGGTT	1_+_71166	NR_040290	+	'intron'	36790795	36799122	4	4	11	2	7	1	1	1	1	1
1	75533495	75533523	38	28	75533509	21	38	1	75533507	75533516	10	ATTGCTGACTCTGGAAGTCA	1_+_71728	NM_027886	+	'3'UTR'	75532811	75533910	16	2	6	3	11	1	1	1	1	1
1	88328619	88328644	33	25	88328632	20	32	0.969697	88328630	88328634	5	TTAAAAAAACAATATATAAA	1_+_71863	NM_027966	+	'extend_3'TUR'	88324625	88329624	8	12	2	2	8	1	1	1	1	1
1	174475984	174476010	40	26	174475998	32	39	0.975	174475997	174475999	3	AAGGGACAGCTCCACTTCAC	1_+_71870	NM_027972	+	'PA'	174475991	174476011	12	1	8	8	10	1	1	1	1	1
1	20980899	20980933	102	34	20980920	47	99	0.970588	20980911	20980922	12	AAGACTGGTGCCTTATTTGG	1_+_71877	NM_027974	+	'PA'	20980912	20980932	28	5	16	10	40	1	1	1	1	1
1	136308282	136308331	2986	49	136308302	1403	2955	0.989618	136308301	136308315	15	AATGATCTCAAGGAATCATT	1_+_72017	NM_028057	+	'3'UTR'	136307657	136308315	632	286	903	271	863	0.992151	0.972789	0.985808	0.981884	0.976244
1	23300876	23300927	73	51	23300908	35	71	0.972603	23300886	23300914	29	ATTTCATCTTTGAATTATTT	1_+_723964	NR_029717	+	'extend_3'TUR'	23298624	23303623	8	24	13	9	17	1	1	1	1	1
1	157419398	157419434	843	36	157419417	706	806	0.956109	157419416	157419417	2	AGTTGCCTTGGTCATGGTGT	1_+_72482	NM_026683	+	'PA'	157419407	157419427	198	121	182	81	224	0.47482	0.514894	0.461929	0.45	0.492308
1	157534339	157534388	826	49	157534362	629	791	0.957627	157534354	157534364	11	ATTTCGACGTCTCAGCAACT	1_+_72482	NM_028250	+	'PA'	157534353	157534373	196	108	194	85	208	0.470024	0.459574	0.492386	0.472222	0.457143
1	182620798	182620831	174	33	182620816	141	166	0.954023	182620810	182620819	10	AATGCTGTCTGAGAATCTTA	1_+_72568	NM_001103182	+	'PA'	182620808	182620828	21	52	39	25	29	1	1	1	1	1
1	136328888	136328947	3967	59	136328912	2375	3769	0.950088	136328912	136328930	19	AACGCTTGGCATTCAAAGAG	1_+_72674	NM_028320	+	'PA'	136328908	136328928	1063	538	740	481	947	0.897804	0.922813	0.885167	0.939453	0.912331
1	158791194	158791218	30	24	158791207	30	30	1	158791207	158791207	1	AATTTATGCTTGTAATGATT	1_+_72713	NM_028333	+	'PA'	158791199	158791219	3	3	3	5	16	1	1	1	1	1
1	60039005	60039034	62	29	60039020	48	59	0.951613	60039019	60039024	6	ATCCTTTGGTGGCCTCTGTT	1_+_72750	NM_001037725	+	'3'UTR'	60038572	60042192	17	7	12	9	14	0.0656371	0.0679612	0.0542986	0.1125	0.0645161
1	60039188	60039231	135	43	60039206	90	129	0.955556	60039206	60039220	15	AATATTTGTACATTATGTGA	1_+_72750	NM_001037725	+	'3'UTR'	60038572	60042192	42	16	29	13	29	0.162162	0.15534	0.131222	0.1625	0.133641
1	60042169	60042208	724	39	60042190	601	692	0.955801	60042189	60042192	4	AGTCTTTCTTTCTCTGTGTG	1_+_72750	NM_001037725	+	'PA'	60042182	60042202	200	80	180	58	174	0.772201	0.776699	0.81448	0.725	0.801843
1	163935973	163935999	21	26	163935986	10	21	1	163935984	163935991	8	AGAACAGTGGTTTGAAATTT	1_+_72753	NR_040562	+	'intron'	163935954	163946450	3	2	3	6	7	1	1	1	1	1
1	62688842	62688870	36	28	62688857	11	35	0.972222	62688852	62688860	9	AGATATCAGTGTCTTGATTT	1_+_72823	NM_001081050	+	'PA'	62688848	62688868	14	3	7	2	9	1	1	1	1	1
1	129701281	129701339	367	58	129701308	91	357	0.972752	129701296	129701321	26	ATTGCTGACTGTGCATTGTA	1_+_72949	NM_028399	+	'3'UTR'	129700137	129701414	93	43	81	48	92	0.522472	0.447917	0.369863	0.521739	0.408889
1	129702325	129702359	137	34	129702346	63	133	0.970803	129702339	129702347	9	ATTGGTGCTAATGATGGACA	1_+_72949	NM_028399	+	'extend_3'TUR'	129701415	129706414	26	15	32	15	45	0.146067	0.15625	0.146119	0.163043	0.2
1	129702475	129702525	194	50	129702509	103	189	0.974227	129702502	129702514	13	ACAGGATTGTGTGAACTATT	1_+_72949	NM_028399	+	'extend_3'TUR'	129701415	129706414	31	25	63	16	54	0.174157	0.260417	0.287671	0.173913	0.24
1	129704620	129704648	56	28	129704635	45	54	0.964286	129704634	129704636	3	AAATCCAAGGCTGAAACATG	1_+_72949	NM_028399	+	'extend_3'TUR'	129701415	129706414	10	7	17	6	14	0.0561798	0.0729167	0.0776256	0.0652174	0.0622222
1	122084744	122084779	148	35	122084759	71	146	0.986486	122084759	122084767	9	AAAAAGCCTTGGTTTGATTT	1_+_73103	NM_001172074	+	'PA'	122084756	122084776	51	12	32	8	43	1	1	1	1	1
1	57442246	57442281	280	35	57442264	139	266	0.95	57442260	57442268	9	AAATGTTATTTGGATGTGTT	1_+_73467	NM_028546	+	'PA'	57442256	57442276	58	40	57	29	82	1	1	1	1	1
1	45880420	45880503	4500	83	45880460	2888	4280	0.951111	45880454	45880465	12	AAAATATTAAAGCCTTGTGT	1_+_73674	NM_028599	+	'PA'	45880448	45880468	775	806	1068	577	1054	1	1	1	1	1
1	63361131	63361163	129	32	63361149	50	126	0.976744	63361146	63361151	6	ATATTATGTGTTTGTTTTTA	1_+_73884	NM_001285937	+	'PA'	63361139	63361159	44	26	20	12	24	1	1	1	1	1
1	93424515	93424552	108	37	93424532	61	105	0.972222	93424527	93424534	8	AGCTACAGTGCTTACTACTT	1_+_74019	NM_028718	+	'3'UTR'	93424361	93425884	40	11	22	9	23	0.769231	0.44	0.647059	0.6	0.511111
1	93425866	93425895	68	29	93425882	31	66	0.970588	93425879	93425885	7	AAGTGTATGGACTGTCAAAT	1_+_74019	NM_028718	+	'PA'	93425874	93425894	12	14	12	6	22	0.230769	0.56	0.352941	0.4	0.488889
1	127492207	127492321	1122	114	127492238	291	1066	0.950089	127492237	127492304	68	ATTTGTGTATTAAAGATGTA	1_+_74150	NM_028787	+	'3'UTR'	127487686	127492261	253	108	221	146	338	0.678284	0.610169	0.653846	0.737374	0.698347
1	127492347	127492427	530	80	127492392	208	504	0.950943	127492361	127492405	45	AAAAACTCTGCTTAAGCGAT	1_+_74150	NM_028787	+	'extend_3'TUR'	127492262	127497261	120	69	117	52	146	0.321716	0.389831	0.346154	0.262626	0.301653
1	20927483	20927513	49	30	20927498	31	47	0.959184	20927497	20927505	9	AATTTTTCTGTTTTGTGTTC	1_+_74229	NM_028829	+	'3'UTR'	20925770	20928837	8	5	11	7	16	0.140351	0.185185	0.25	0.5	0.271186
1	20929124	20929154	61	30	20929140	18	59	0.967213	20929137	20929145	9	AAAGATGTCAGGGTTACAAT	1_+_74229	NM_028829	+	'extend_3'TUR'	20928838	20933837	19	5	15	2	18	0.333333	0.185185	0.340909	0.142857	0.305085
1	20929712	20929742	65	30	20929730	38	63	0.969231	20929725	20929730	6	ATTTTGGCCTACATTATTTT	1_+_74229	NM_028829	+	'extend_3'TUR'	20928838	20933837	20	14	13	1	15	0.350877	0.518519	0.295455	0.0714286	0.254237
1	20928823	20928855	32	32	20928836	15	32	1	20928835	20928849	15	ATACTTTCTCATGAATAAGA	1_+_74229	NM_028829	+	'PA'	20928827	20928847	10	3	5	4	10	0.175439	0.111111	0.113636	0.285714	0.169492
1	134405200	134405231	40	31	134405214	33	38	0.95	134405211	134405220	10	AACTTTATGGCAGTCTAACC	1_+_74626	NM_029025	+	'PA'	134405206	134405226	3	2	14	3	16	1	1	1	1	1
1	166217958	166217989	123	31	166217973	44	121	0.98374	166217972	166217976	5	TTGAATGTGTGGTGTCATCT	1_+_74895	NM_029115	+	'PA'	166217968	166217988	29	10	33	13	36	1	1	1	1	1
1	173057064	173057095	29	31	173057080	10	28	0.965517	173057073	173057086	14	TTACTGACCTGGGTTTTCTC	1_+_75472	NM_001081275	+	'3'UTR'	173056917	173057098	12	3	7	0	6	1	1	1	0	1
1	136528506	136528541	341	35	136528524	266	327	0.958944	136528523	136528527	5	AAACAGTGTGTTGGTGCTTT	1_+_75605	NM_152895	+	'3'UTR'	136527952	136529455	113	27	59	28	100	0.429658	0.355263	0.302564	0.27451	0.341297
1	136528940	136528974	82	34	136528960	33	80	0.97561	136528953	136528962	10	AGAGCCAGTCCTTTAAGCCA	1_+_75605	NM_152895	+	'3'UTR'	136527952	136529455	16	6	20	8	30	0.0608365	0.0789474	0.102564	0.0784314	0.102389
1	136529439	136529475	396	36	136529458	304	391	0.987374	136529455	136529463	9	AACCCAGTGGTCTGCAGTGT	1_+_75605	NM_152895	+	'PA'	136529445	136529465	103	31	89	51	117	0.391635	0.407895	0.45641	0.5	0.399317
1	63799021	63799083	398	62	63799039	268	389	0.977387	63799037	63799047	11	ATTCGTGGATCAGCTGGCTG	1_+_75619	NM_172422	+	'3'UTR'	63798979	63799959	123	66	91	32	77	1	1	1	1	1
1	21220229	21220262	209	33	21220246	164	201	0.961722	21220245	21220248	4	AAGCCTTCTCATTCATTTCT	1_+_75712	NM_001290679	+	'PA'	21220238	21220258	70	12	32	14	73	1	1	1	1	1
1	82748333	82748372	936	39	82748355	562	919	0.981838	82748348	82748357	10	ATTGTTTCTGTCTTTGCATC	1_+_75734	NM_029409	+	'3'UTR'	82748292	82748964	304	103	218	75	219	0.347429	0.2575	0.234409	0.197889	0.27037
1	82748942	82748982	2502	40	82748962	1713	2475	0.989209	82748961	82748967	7	AAAGCAATGTCTATGGAAAG	1_+_75734	NM_029409	+	'PA'	82748954	82748974	571	297	712	304	591	0.652571	0.7425	0.765591	0.802111	0.72963
1	120504298	120504334	104	36	120504313	79	102	0.980769	120504313	120504321	9	AAATGACAATTCTTAATGCA	1_+_76707	NM_001081276	+	'3'UTR'	120503572	120506039	24	20	26	14	18	0.10084	0.176991	0.141304	0.147368	0.0895522
1	120505994	120506066	748	72	120506038	347	729	0.974599	120506009	120506038	30	ACCTTTTGAGTTTTTCCTAG	1_+_76707	NM_001081276	+	'PA'	120506029	120506049	214	93	158	81	183	0.89916	0.823009	0.858696	0.852632	0.910448
1	74314754	74314803	9163	49	74314782	7315	8858	0.966714	74314780	74314785	6	ACTTGAGAATTTGTTGATTT	1_+_76709	NM_029711	+	'PA'	74314777	74314797	2675	1530	1961	1049	2265	1	1	1	1	1
1	178950297	178950334	84	37	178950314	44	84	1	178950308	178950326	19	ATATTTACATTCATCTGATT	1_+_76816	NM_029756	+	'3'UTR'	178950276	178950563	16	9	20	12	27	0.207792	0.1875	0.235294	0.375	0.278351
1	178820662	178820713	23	51	178820696	6	22	0.956522	178820671	178820706	36	AAAGGAAAGGAAAAAAACTG	1_+_76816	NM_029756	+	'intron'	178808238	178849674	12	3	2	0	5	0.155844	0.0625	0.0235294	0	0.0515464
1	178877644	178877673	43	29	178877657	21	41	0.953488	178877656	178877663	8	AAAAGATTTTGTTGATTTTT	1_+_76816	NM_029756	+	'intron'	178876367	178878411	2	3	13	7	16	0.025974	0.0625	0.152941	0.21875	0.164948
1	178950548	178950582	197	34	178950567	90	192	0.974619	178950562	178950570	9	ACTTGAGTTGTTCCGTTTCC	1_+_76816	NM_029756	+	'PA'	178950553	178950573	47	33	50	13	49	0.61039	0.6875	0.588235	0.40625	0.505155
1	82441919	82441957	1054	38	82441939	611	1010	0.958254	82441937	82441941	5	AATCAGTGTGTTGCTCGAGT	1_+_76867	NM_001122685	+	'PA'	82441931	82441951	328	77	161	115	329	1	1	1	1	1
1	193445706	193445731	22	25	193445720	17	21	0.954545	193445714	193445721	8	AGTCTTCTGTCTCACACTTA	1_+_77065	NM_178632	+	'extend_3'TUR'	193445571	193450570	4	4	7	0	6	0.0634921	0.0588235	0.0619469	0	0.0652174
1	193446533	193446571	346	38	193446555	90	338	0.976879	193446551	193446557	7	CTTGTGTTTTACCTTTTTTT	1_+_77065	NM_178632	+	'extend_3'TUR'	193445571	193450570	57	59	101	46	75	0.904762	0.867647	0.893805	0.884615	0.815217
1	193447556	193447590	29	34	193447569	11	29	1	193447567	193447585	19	CGTTGAGTGTGAAAGTAACT	1_+_77065	NM_178632	+	'extend_3'TUR'	193445571	193450570	2	5	5	6	11	0.031746	0.0735294	0.0442478	0.115385	0.119565
1	60444881	60444935	1461	54	60444903	1112	1401	0.958932	60444902	60444905	4	ATTTGGAGGATTGTTTTGTT	1_+_77951	NM_030013	+	'extend_3'TUR'	60444232	60449231	381	165	339	160	356	1	1	1	1	1
1	88154187	88154215	43	28	88154200	23	41	0.953488	88154199	88154204	6	AGCGATCTCAGTTTGCTCTC	1_+_78795	NM_030184	+	'intron'	88153938	88158616	9	8	11	3	10	0.236842	0.470588	0.423077	0.230769	0.232558
1	88149048	88149080	100	32	88149064	63	96	0.96	88149063	88149070	8	AAAAGCATTCTCTTTATTGT	1_+_78795	NM_027456	+	'PA'	88149056	88149076	29	9	15	10	33	0.763158	0.529412	0.576923	0.769231	0.767442
1	180181017	180181047	81	30	180181035	36	79	0.975309	180181029	180181035	7	AGCTGATTTTGATTGATACT	1_+_78825	NM_024282	+	'3'UTR'	180179600	180182728	19	26	14	6	14	0.0308943	0.100386	0.0366492	0.0310881	0.0230643
1	180182697	180182745	1967	48	180182726	1385	1874	0.95272	180182723	180182728	6	AAATGTTTTATAGTTCTTTC	1_+_78825	NM_024282	+	'PA'	180182718	180182738	565	218	345	179	567	0.918699	0.841699	0.903141	0.927461	0.934102
1	43799382	43799435	941	53	43799417	409	907	0.963868	43799409	43799419	11	AGAGAAGCATCAGAATTCAC	1_+_78896	NM_024283	+	'PA'	43799399	43799419	81	30	58	73	665	0.952941	1	0.983051	0.960526	0.973646
1	17756274	17756301	23	27	17756286	12	23	1	17756286	17756293	8	AAAAGATGACTTTCTCTATC	1_+_83691	NM_031402	+	'PA'	17756278	17756298	12	0	1	1	9	1	0	1	1	1
1	159498536	159498568	280	32	159498553	256	275	0.982143	159498553	159498554	2	AAATGCTTGTCTCTGGCTGG	1_+_89867	NM_001159986	+	'PA'	159498545	159498565	59	22	63	45	86	1	1	1	1	1
1	137263382	137263427	1691	45	137263405	1294	1613	0.953873	137263404	137263410	7	AAGTGGCTATACCTCACCTT	1_+_93689	NM_053106	+	'3'UTR'	137262686	137264642	338	364	407	150	354	0.896552	0.90099	0.896476	0.892857	0.871921
1	137264730	137264801	138	71	137264746	55	136	0.985507	137264744	137264788	45	ACCGGGCCAGTCTCCAGACT	1_+_93689	NM_053106	+	'extend_3'TUR'	137264643	137269642	23	28	35	13	37	0.061008	0.0693069	0.0770925	0.077381	0.091133
1	43011982	43012011	39	29	43011999	28	38	0.974359	43011992	43012002	11	ATGAATGTGTGAGCATGGTC	1_+_93690	NM_053107	+	'5'UTR'	43009717	43089043	14	2	10	1	11	1	1	1	1	1
1	36584039	36584074	145	35	36584060	59	140	0.965517	36584054	36584063	10	AGATACGGTGTGAAGACTGG	1_+_94218	NM_053186	+	'3'UTR'	36582076	36585082	51	17	22	13	37	1	1	1	1	1
1	36565579	36565634	262	55	36565603	117	256	0.977099	36565597	36565623	27	ATATAAGTTTTGGTGAGCAT	1_+_94220	NM_033570	+	'3'UTR'	36563452	36565621	54	41	72	27	62	1	1	1	1	1
1	17615829	17615865	35	36	17615845	18	34	0.971429	17615839	17615856	18	ATTTTTATTAGATATTTTCT	1_+_94227	NM_053191	+	'3'UTR'	17615052	17621020	1	10	9	8	6	0.03125	0.212766	0.107143	0.101266	0.0526316
1	17613799	17613838	65	39	17613812	18	65	1	17613811	17613828	18	ACACTTTCTCAAGTTGAAAT	1_+_94227	NM_053191	+	'intron'	17611844	17614915	4	12	16	15	18	0.125	0.255319	0.190476	0.189873	0.157895
1	17620995	17621038	240	43	17621019	78	232	0.966667	17621012	17621025	14	ATTTTGAGATCTGAGTGTTT	1_+_94227	NM_053191	+	'PA'	17621010	17621030	26	24	54	49	79	0.8125	0.510638	0.642857	0.620253	0.692982
1	174125574	174125624	789	50	174125597	501	764	0.968314	174125590	174125610	21	GATGTATCAAGTTAAAATTA	1_+_98193	NM_153555	+	'3'UTR'	174124804	174126524	268	31	130	111	224	0.626168	0.402597	0.555556	0.676829	0.542373
1	174125665	174125698	103	33	174125680	44	98	0.951456	174125679	174125687	9	AAGAGCAAGCGATCGAGTGA	1_+_98193	NM_153555	+	'3'UTR'	174124804	174126524	30	9	21	13	25	0.0700935	0.116883	0.0897436	0.0792683	0.0605327
1	174126500	174126538	476	38	174126523	151	454	0.953782	174126516	174126524	9	GCTTTGTGTGGTATGTGGTC	1_+_98193	NM_153555	+	'PA'	174126514	174126534	130	37	83	40	164	0.303738	0.480519	0.354701	0.243902	0.397094
1	95748597	95748625	26	28	95748610	11	26	1	95748609	95748618	10	ACACCCAGCTTACCTTGTTC	1_+_98314	NM_178882	+	'3'UTR'	95747404	95748751	9	5	5	2	5	0.264706	0.3125	0.151515	0.105263	0.138889
1	95748886	95748946	116	60	95748908	30	112	0.965517	95748902	95748938	37	AAAGTTGTGGCTCATTACAT	1_+_98314	NM_178882	+	'extend_3'TUR'	95748752	95753751	25	11	28	17	31	0.735294	0.6875	0.848485	0.894737	0.861111
1	89207391	89207424	26	33	89207413	16	26	1	89207401	89207415	15	ATACCAGTGTGCCTTTTTGG	1_+_98363	NM_028889	+	'extend_3'TUR'	89207367	89212366	3	1	4	5	13	1	1	1	1	1
1	133745409	133745455	578	46	133745438	481	558	0.965398	133745438	133745441	4	AATGGCTTGTATCCCTGTGT	1_+_98396	NM_173865	+	'PA'	133745430	133745450	174	58	100	69	157	1	1	1	1	1
1	91050238	91050296	79	58	91050281	29	76	0.962025	91050247	91050285	39	ACGTAAGAAAGGTGGTATCT	1_+_98402	NM_133816	+	'3'UTR'	91049927	91050368	12	12	24	9	19	0.0888889	0.162162	0.20339	0.138462	0.143939
1	91051616	91051671	173	55	91051640	114	165	0.953757	91051635	91051661	27	AAATTTTATTTGGACATTTC	1_+_98402	NM_133816	+	'extend_3'TUR'	91050369	91055368	30	29	43	18	45	0.222222	0.391892	0.364407	0.276923	0.340909
1	91050338	91050407	297	69	91050367	131	283	0.952862	91050363	91050387	25	AGGTTTTTATGTTCTTTAAA	1_+_98402	NM_133816	+	'PA'	91050358	91050378	93	33	51	38	68	0.688889	0.445946	0.432203	0.584615	0.515152
1	43172771	43172816	479	45	43172790	372	458	0.956159	43172789	43172796	8	ATCTTGAGCAGGCCTGTCAT	1_+_98404	NM_133818	+	'PA'	43172781	43172801	150	61	84	39	124	1	1	1	1	1
1	133827813	133827855	321	42	133827831	122	306	0.953271	133827828	133827839	12	AGGACACGGTTTGGGCTGTG	1_+_98415	NM_001145804	+	'3'UTR'	133827784	133832898	67	48	92	51	48	0.0539019	0.0556845	0.0791058	0.0847176	0.0458891
1	133828891	133828947	467	56	133828925	123	446	0.955032	133828918	133828932	15	AGATATAAAAGATTGAGATT	1_+_98415	NM_001145804	+	'3'UTR'	133827784	133832898	91	89	112	56	98	0.07321	0.103248	0.0963027	0.0930233	0.0936902
1	133829524	133829565	491	41	133829544	277	474	0.965377	133829537	133829549	13	AAAGCACCTAGTAGCAGAGA	1_+_98415	NM_001145804	+	'3'UTR'	133827784	133832898	124	96	101	51	102	0.0997586	0.111369	0.0868444	0.0847176	0.0975143
1	133826277	133826316	1006	39	133826298	899	992	0.986083	133826294	133826298	5	AAAAGAAAAGAAAATGCCCA	1_+_98415	NM_001145804	+	'exon'	133826193	133826339	428	111	178	94	181	0.344328	0.12877	0.153052	0.156146	0.17304
1	133832872	133832916	2539	44	133832897	1961	2414	0.950768	133832896	133832901	6	AGATGTGTGCTTCGTGTGCT	1_+_98415	NM_001145804	+	'PA'	133832888	133832908	459	456	613	319	567	0.369268	0.529002	0.527085	0.5299	0.542065
1	183099102	183099135	156	33	183099118	98	152	0.974359	183099115	183099123	9	AAATTAATCTGATTGTTCTA	1_+_98417	NM_030131	+	'PA'	183099115	183099135	44	18	28	15	47	1	1	1	1	1
1	108290801	108290839	673	38	108290821	450	653	0.970282	108290817	108290825	9	ACTGAATCTATCTGCTTTTG	1_+_98432	NM_133821	+	'PA'	108290812	108290832	107	105	175	88	178	1	1	1	1	1
1	136404439	136404481	1105	42	136404459	752	1081	0.978281	136404456	136404467	12	AAACCTTGTCATCTGTTTTC	1_+_98710	NM_145510	+	'PA'	136404451	136404471	251	134	271	118	307	0.90942	0.887417	0.87987	0.900763	0.919162
1	16121628	16121665	101	37	16121644	52	96	0.950495	16121642	16121647	6	ACTAGTGTGCTTGAAAACTG	1_+_98711	NM_133832	+	'3'UTR'	16121499	16122631	35	11	16	13	21	0.185185	0.13253	0.125984	0.19697	0.106061
1	16122482	16122516	48	34	16122497	24	46	0.958333	16122494	16122508	15	ATGTGATTGCTTCTGTTTGT	1_+_98711	NM_133832	+	'3'UTR'	16121499	16122631	15	1	10	5	15	0.0793651	0.0120482	0.0787402	0.0757576	0.0757576
1	16123796	16123840	104	44	16123814	84	99	0.951923	16123814	16123817	4	AGCTTTTTGTCTTTCATTTC	1_+_98711	NM_133832	+	'extend_3'TUR'	16122632	16127631	33	14	16	4	32	0.174603	0.168675	0.125984	0.0606061	0.161616
1	16122607	16122646	434	39	16122630	285	422	0.97235	16122621	16122632	12	AGTTTGTGGTTATTAGCTAT	1_+_98711	NM_133832	+	'PA'	16122621	16122641	106	57	85	44	130	0.560847	0.686747	0.669291	0.666667	0.656566
10	52993234	52993267	99	33	52993249	53	97	0.979798	52993249	52993255	7	AATTGCTTTCATGGTGCCTA	10_-_100038725	NM_001204983	-	'extend_3'TUR'	52992887	52997886	21	12	22	13	29	1	1	1	1	1
10	79593278	79593314	299	36	79593297	180	285	0.953177	79593294	79593300	7	ATTTGTTTGCTCTGGGTTTT	10_-_100503659	NM_001195268	-	'3'UTR'	79593179	79594032	111	26	59	30	59	1	1	1	1	1
10	30322987	30323021	139	34	30323003	75	133	0.956835	30323000	30323009	10	AACATTTTTAGTGTACACTT	10_-_100504586	NR_045008	-	'PA'	30322991	30323011	37	6	26	18	46	1	1	1	1	1
10	126468046	126468074	35	28	126468060	12	35	1	126468056	126468064	9	ACATGTCTTGTGTTGTTATT	10_-_100504608	NM_001205036	-	'extend_3'TUR'	126464961	126469960	8	7	9	4	7	1	1	1	1	1
10	58627113	58627151	88	38	58627134	41	84	0.954545	58627127	58627134	8	AAGCTTGGTTATGATATTAT	10_-_103080	NM_001024911	-	'3'UTR'	58626860	58627676	17	19	19	15	14	0.116438	0.139706	0.112426	0.151515	0.0843373
10	58626836	58626891	602	55	58626866	161	585	0.971761	58626850	58626869	20	AATCTATGTATTTCCTAAAA	10_-_103080	NM_001024911	-	'PA'	58626850	58626870	115	111	138	79	142	0.787671	0.816176	0.816568	0.79798	0.855422
10	75236848	75236885	575	37	75236868	361	548	0.953043	75236865	75236870	6	AAGAGTAATGGTTTTGCTTC	10_-_103140	NM_133994	-	'PA'	75236857	75236877	169	25	85	45	224	1	1	1	1	1
10	40908053	40908084	27	31	40908067	19	26	0.962963	40908062	40908074	13	AATTCATCCAAATCATGTAT	10_-_103199	NM_133999	-	'3'UTR'	40907978	40908327	6	7	6	3	4	0.0697674	0.189189	0.125	0.115385	0.0430108
10	40907960	40907994	274	34	40907978	181	264	0.963504	40907976	40907981	6	TGCTGGTTTTGCTTCTGACT	10_-_103199	NM_133999	-	'PA'	40907968	40907988	80	30	42	23	89	0.930233	0.810811	0.875	0.884615	0.956989
10	41438634	41438666	183	32	41438651	141	175	0.956284	41438649	41438652	4	AAAAGCCTGTGGAAATATTC	10_-_103268	NM_001243075	-	'PA'	41438636	41438656	35	30	45	19	46	1	1	1	1	1
10	127980604	127980641	303	37	127980626	144	290	0.957096	127980619	127980626	8	AACAAAAGTGAAAATTTCTT	10_-_103284	NM_134003	-	'PA'	127980611	127980631	76	37	64	28	85	1	1	1	1	1
10	80949160	80949224	1246	64	80949205	674	1197	0.960674	80949178	80949209	32	ACCGAGCCTCCAGGTGTCCT	10_-_103425	NM_134009	-	'PA'	80949194	80949214	374	163	242	92	326	1	1	1	1	1
10	117187801	117187829	59	28	117187817	43	57	0.966102	117187813	117187817	5	ATTGGTTTGTTTGTTTGTTT	10_-_103468	NM_134010	-	'3'UTR'	117187699	117187915	10	16	12	6	13	0.169492	0.153846	0.111111	0.103448	0.180556
10	117187660	117187711	362	51	117187678	161	344	0.950276	117187676	117187699	24	AGATGAGAGTTTTCTCTTAT	10_-_103468	NM_134010	-	'extend_3'TUR'	117182699	117187698	49	88	96	52	59	0.830508	0.846154	0.888889	0.896552	0.819444
10	75108839	75108877	358	38	75108857	164	346	0.96648	75108855	75108864	10	TCTCTGCCTCTTTGCTCATC	10_-_104248	NM_172549	-	'PA'	75108845	75108865	74	56	92	48	76	1	1	1	1	1
10	80493523	80493555	129	32	80493541	97	125	0.968992	80493539	80493544	6	AAAGCCTGTGTGGCCATGTC	10_-_106947	NM_134135	-	'3'UTR'	80491285	80493701	38	6	36	12	33	0.273381	0.206897	0.391304	0.363636	0.311321
10	80491269	80491305	285	36	80491286	129	274	0.961404	80491283	80491291	9	ATTTATTTATTTGTTTTTTT	10_-_106947	NM_134135	-	'PA'	80491275	80491295	101	23	56	21	73	0.726619	0.793103	0.608696	0.636364	0.688679
10	60227296	60227371	948	75	60227341	564	921	0.971519	60227335	60227354	20	AAAAGGAAAAAAAAAACCTT	10_-_107449	NM_029770	-	'3'UTR'	60225343	60227955	537	81	101	23	179	1	1	1	1	1
10	126954353	126954390	1143	37	126954373	710	1110	0.971129	126954371	126954374	4	CCAGGGTTCCTATTACTGTG	10_-_108037	NM_001252316	-	'3'UTR'	126954179	126954844	190	151	402	126	241	0.637584	0.740196	0.789784	0.732558	0.706745
10	126954654	126954695	353	41	126954679	150	336	0.951841	126954670	126954681	12	AATTTGTAGCTGAGATTTCT	10_-_108037	NM_001252316	-	'3'UTR'	126954179	126954844	85	42	90	39	80	0.285235	0.205882	0.176817	0.226744	0.234604
10	76950896	76950942	411	46	76950919	147	391	0.951338	76950913	76950928	16	AGCCTGAGGACCATCTGTGG	10_-_108707	NM_133998	-	'3'UTR'	76949400	76951094	104	54	102	45	86	0.344371	0.412214	0.41129	0.454545	0.348178
10	76949389	76949427	627	38	76949409	519	597	0.952153	76949406	76949410	5	AAACGTGCAGTCCCCTGGCT	10_-_108707	NM_133998	-	'PA'	76949390	76949410	181	76	139	53	148	0.599338	0.580153	0.560484	0.535354	0.59919
10	42722284	42722321	73	37	42722307	51	72	0.986301	42722295	42722310	16	AGCTGCGCACTTACACGTGC	10_-_109205	NM_175407	-	'PA'	42722296	42722316	32	13	7	7	13	1	1	1	1	1
10	79372778	79372815	954	37	79372798	868	925	0.969602	79372797	79372799	3	AGTCCTGTCCCCGTGTTTGT	10_-_109284	NM_177994	-	'PA'	79372788	79372808	234	129	222	99	241	1	1	1	1	1
10	76757001	76757025	21	24	76757014	18	20	0.952381	76757013	76757015	3	AAAGAGCACGAGAATATAGA	10_-_110532	NM_001024837	-	'3'UTR'	76753472	76757526	6	5	1	1	7	0.153846	0.192308	0.0416667	0.0434783	0.125
10	76753457	76753489	154	32	76753473	113	148	0.961039	76753472	76753476	5	ACCTGCATGGACATTTTCCT	10_-_110532	NM_001024837	-	'PA'	76753462	76753482	33	21	23	22	49	0.846154	0.807692	0.958333	0.956522	0.875
10	77633638	77633671	247	33	77633655	201	235	0.951417	77633654	77633658	5	ACTGGTTTTGTCTGTGTGTG	10_-_110816	NM_029546	-	'PA'	77633645	77633665	58	45	58	19	55	1	1	1	1	1
10	126718994	126719033	446	39	126719012	307	427	0.957399	126719012	126719020	9	GTTCTGACTCTGTACTCATT	10_-_110962	NM_033072	-	'PA'	126719002	126719022	80	39	115	53	140	1	1	1	1	1
10	81053631	81053664	155	33	81053650	118	150	0.967742	81053649	81053651	3	AGAGATTTGTCCTTTACCCA	10_-_114606	NM_053254	-	'PA'	81053640	81053660	19	11	26	14	80	1	1	1	1	1
10	43670426	43670454	30	28	43670441	8	29	0.966667	43670435	43670444	10	ATGATGAAATCGTGGGCTTA	10_-_11630	NM_172393	-	'3'UTR'	43670113	43671674	18	2	4	3	2	1	1	1	1	1
10	126634106	126634172	578	66	126634129	328	550	0.951557	126634121	126634133	13	AAGTCATTCACAGAAGTTTT	10_-_117150	NM_054097	-	'PA'	126634113	126634133	190	41	146	62	111	1	1	1	1	1
10	119520650	119520684	153	34	119520671	64	152	0.993464	119520663	119520671	9	ACTTCATCGCCCAGTCTGTG	10_-_117599	NM_080446	-	'PA'	119520654	119520674	45	17	24	17	49	1	1	1	1	1
10	121217948	121217977	52	29	121217965	27	50	0.961538	121217962	121217965	4	AGCAGCTTTTTGTTTGTTTG	10_-_117600	NM_001242411	-	'extend_3'TUR'	121213047	121218046	20	4	7	1	18	0.208333	0.571429	0.233333	0.05	0.246575
10	121468404	121468428	23	24	121468417	23	23	1	121468417	121468417	1	AAAAGAAAAAAATCAAGGAT	10_-_117600	NM_001242411	-	'intron'	121368566	121484182	8	0	6	2	7	0.0833333	0	0.2	0.1	0.0958904
10	121218032	121218063	156	31	121218048	102	153	0.980769	121218046	121218049	4	ACGCCTTTGTCTGCTCGTGA	10_-_117600	NM_001242411	-	'PA'	121218037	121218057	68	3	17	17	48	0.708333	0.428571	0.566667	0.85	0.657534
10	80169681	80169725	3955	44	80169702	2721	3797	0.960051	80169701	80169709	9	ATTTGTGTGTTGTGTCCCCA	10_-_11776	NM_007460	-	'extend_3'TUR'	80164723	80169722	1027	349	920	467	1034	0.969783	0.997143	0.998914	1	0.994231
10	90453710	90453740	71	30	90453726	59	69	0.971831	90453721	90453729	9	AAATTTGCTTTAAGATATTG	10_-_11783	NM_009684	-	'3'UTR'	90452056	90454194	31	12	13	4	9	0.169399	0.148148	0.0778443	0.0421053	0.0523256
10	90452039	90452082	644	43	90452063	278	629	0.976708	90452056	90452064	9	AAAAACATTTTGGTTTCGGG	10_-_11783	NM_009684	-	'PA'	90452046	90452066	152	69	154	91	163	0.830601	0.851852	0.922156	0.957895	0.947674
10	80029848	80029890	899	42	80029874	370	870	0.967742	80029865	80029874	10	AAAAACCTGCCCTTCTGTCT	10_-_118445	NM_078477	-	'PA'	80029856	80029876	220	105	202	111	232	0.964912	0.963303	0.914027	0.940678	0.931727
10	24635013	24635042	26	29	24635031	23	25	0.961538	24635029	24635031	3	AAAATTCTGTTGTCTGCATC	10_-_11846	NM_007482	-	'3'UTR'	24635013	24635415	17	1	3	2	2	1	1	1	1	1
10	116488029	116488089	15877	60	116488062	7739	15186	0.956478	116488055	116488063	9	AGCCCTTAATGTCTTACTGA	10_-_12461	NM_007636	-	'PA'	116488044	116488064	4546	2250	4129	1708	3532	0.993878	0.997783	0.997343	0.997664	0.99774
10	68801029	68801097	1856	68	68801053	1085	1809	0.974677	68801046	68801054	9	AGATGTCACTGTGGTGGCTG	10_-_12534	NM_007659	-	'3'UTR'	68799383	68801245	177	545	548	247	292	1	1	1	1	1
10	128134967	128135024	713	57	128135001	460	690	0.967742	128134989	128135001	13	AGCTGTAGAGTGAATCTCTT	10_-_12566	NM_016756	-	'PA'	128134985	128135005	118	203	167	91	111	1	1	1	1	1
10	76515751	76515801	227	50	76515784	150	218	0.960352	76515774	76515791	18	ATATTTTTCTAAAACATTTA	10_-_12822	NM_009929	-	'3'UTR'	76514924	76515938	93	33	43	8	41	0.373494	0.392857	0.425743	0.275862	0.328
10	76514908	76514945	383	37	76514926	242	370	0.966057	76514923	76514927	5	AACGCTTGGTTTATAAGCTG	10_-_12822	NM_009929	-	'PA'	76514914	76514934	156	51	58	21	84	0.626506	0.607143	0.574257	0.724138	0.672
10	76171512	76171556	3361	44	76171538	1841	3211	0.95537	76171536	76171538	3	CTCCGTGCCTCTTTATCTAC	10_-_12833	NM_009933	-	'PA'	76171527	76171547	1078	451	443	258	981	0.953982	0.967811	0.944563	0.984733	0.958944
10	76060815	76060851	246	36	76060833	125	239	0.971545	76060828	76060838	11	ACACTATTTGTCTGCCTCTG	10_-_12834	NM_146007	-	'intron'	76059557	76066073	75	28	30	26	80	0.104603	0.0936455	0.103448	0.136126	0.144928
10	76058483	76058524	1521	41	76058507	872	1492	0.980934	76058501	76058507	7	CCTGTTGCTGCCAGGTCCCC	10_-_12834	NM_146007	-	'PA'	76058491	76058511	490	241	234	141	386	0.683403	0.80602	0.806897	0.73822	0.699275
10	94637887	94637915	42	28	94637903	14	40	0.952381	94637899	94637907	9	AGAATGTGCCTCTTTCAATG	10_-_12905	NM_009950	-	'3'UTR'	94637380	94638310	10	7	5	2	16	0.454545	0.875	0.238095	0.125	0.313725
10	94637361	94637392	82	31	94637376	41	78	0.95122	94637374	94637380	7	AAAGTGCGTGTCCATTGTGT	10_-_12905	NM_009950	-	'PA'	94637370	94637390	12	1	16	14	35	0.545455	0.125	0.761905	0.875	0.686275
10	84594428	84594465	716	37	84594447	543	684	0.955307	84594446	84594448	3	AATCTCGTGTACTTGTGTTC	10_-_12952	NM_007771	-	'PA'	84594435	84594455	128	113	202	70	171	1	1	1	1	1
10	128157174	128157209	121	35	128157194	64	116	0.958678	128157187	128157197	11	AAAAGCCCTCCCGCAAGGTT	10_-_13139	NM_016811	-	'PA'	128157182	128157202	47	6	22	11	30	1	1	1	1	1
10	75233956	75233996	1140	40	75233978	791	1089	0.955263	75233974	75233982	9	AAACATGACTTCTTTGCTTC	10_-_13202	NM_010027	-	'PA'	75233968	75233988	302	75	259	148	305	1	1	1	1	1
10	60891222	60891261	422	39	60891240	302	407	0.964455	60891238	60891241	4	ACTTGGTGGTGGTTTGTGGT	10_-_13688	NM_010124	-	'extend_3'TUR'	60890245	60895244	146	33	80	40	108	0.426901	0.165	0.227273	0.236686	0.375
10	60894505	60894560	940	55	60894539	232	901	0.958511	60894526	60894546	21	ATGGAGTCTTGGGAAAACGT	10_-_13688	NM_010124	-	'extend_3'TUR'	60890245	60895244	181	162	262	126	170	0.52924	0.81	0.744318	0.745562	0.590278
10	92710144	92710197	932	53	92710180	510	891	0.956009	92710161	92710180	20	AAAAGAGTGTTTGGATTCGA	10_-_13713	NM_013508	-	'3'UTR'	92710161	92712754	259	104	188	83	257	0.256944	0.221748	0.273654	0.231198	0.287794
10	92712049	92712090	2567	41	92712072	1856	2443	0.951695	92712068	92712072	5	AACATGTTCCAAAGTGCACT	10_-_13713	NM_013508	-	'3'UTR'	92710161	92712754	738	347	472	265	621	0.732143	0.739872	0.687045	0.738162	0.695409
10	22825226	22825266	42	40	22825242	10	40	0.952381	22825237	22825258	22	AAACAAAAACCTTTGTGATA	10_-_14051	NM_010167	-	'3'UTR'	22823974	22826013	16	3	6	7	8	0.307692	0.157895	0.176471	0.333333	0.133333
10	22825813	22825839	26	26	22825828	17	25	0.961538	22825823	22825829	7	AAAGGAAGCTCTATGGTCTT	10_-_14051	NM_010167	-	'3'UTR'	22823974	22826013	6	3	4	1	11	0.115385	0.157895	0.117647	0.047619	0.183333
10	22822753	22822783	126	30	22822769	110	121	0.960317	22822768	22822770	3	ATACTTTGTCTTCAGTCATC	10_-_14051	NM_010167	-	'extend_3'TUR'	22818974	22823973	30	13	24	13	41	0.576923	0.684211	0.705882	0.619048	0.683333
10	114887350	114887397	967	47	114887370	588	925	0.956567	114887367	114887375	9	AAACTAGCTCTTTCAAGTGT	10_-_14160	NM_010195	-	'PA'	114887360	114887380	182	76	204	57	406	0.994536	0.987013	0.976077	0.966102	0.973621
10	84560456	84560497	29	41	84560471	17	29	1	84560465	84560491	27	AGCTATAATTCTCAGCTGAC	10_-_14202	NM_010214	-	'3'UTR'	84559764	84560820	13	1	5	0	10	1	1	1	0	1
10	79720882	79720921	569	39	79720903	207	545	0.957821	79720897	79720906	10	AAGACTAGTGGGTTGGTTGG	10_-_14431	NM_010255	-	'PA'	79720886	79720906	145	48	108	69	175	1	1	1	1	1
10	122550268	122550335	2514	67	122550300	1002	2423	0.963803	122550286	122550302	17	CTGCTGTTTTGATGAATTAT	10_-_14479	NM_027604	-	'PA'	122550290	122550310	610	371	570	282	590	0.959119	0.951282	0.917874	0.892405	0.920437
10	128356949	128356993	4169	44	128356970	3085	3973	0.952986	128356969	128356975	7	ATGTGGTGTGTTTGAAGGAG	10_-_14533	NM_015740	-	'PA'	128356960	128356980	1352	370	777	305	1169	1	1	1	1	1
10	128319333	128319399	877	66	128319353	187	841	0.958951	128319350	128319385	36	AATAGTTCCATGGTGAGCTC	10_-_14561	NM_010272	-	'extend_3'TUR'	128316602	128321601	326	52	146	89	228	0.802956	0.702703	0.776596	0.780702	0.8
10	128320388	128320423	187	35	128320409	134	183	0.97861	128320403	128320409	7	AACCATACCTCAGCAGTGGC	10_-_14561	NM_010272	-	'extend_3'TUR'	128316602	128321601	63	16	39	21	44	0.155172	0.216216	0.207447	0.184211	0.154386
10	80991453	80991495	1596	42	80991477	1211	1592	0.997494	80991469	80991478	10	AAACTCTGGCTCCTTTGTGA	10_-_14672	NM_010301	-	'PA'	80991467	80991487	496	179	312	162	443	1	1	1	1	1
10	80411359	80411385	33	26	80411374	25	32	0.969697	80411370	80411374	5	CTTTTGTCTCGACTCTAAAT	10_-_14708	NM_010319	-	'PA'	80411359	80411379	4	0	11	1	16	1	0	1	1	1
10	10504081	10504111	69	30	10504097	29	66	0.956522	10504095	10504099	5	TTTTAAAAAATTAAGTAAAT	10_-_14816	NM_016976	-	'intron'	10502593	10656126	16	0	5	5	40	1	0	1	1	1
10	75246545	75246574	61	29	75246560	47	59	0.967213	75246560	75246565	6	AATTTCTCCGTGTTGTTTCT	10_-_14871	NM_008185	-	'PA'	75246548	75246568	18	0	6	4	31	1	0	1	1	1
10	75294576	75294607	60	31	75294594	17	57	0.95	75294588	75294598	11	TTTCTTTCCTTTTTTTTCTT	10_-_14872	NM_010361	-	'PA'	75294580	75294600	19	3	6	5	24	1	1	1	1	1
10	30552148	30552180	129	32	30552166	85	125	0.968992	30552161	30552167	7	ATTTCATGTGGAGGAGTTGC	10_-_15214	NM_013904	-	'PA'	30552155	30552175	63	31	9	1	21	1	1	1	1	1
10	61731834	61731873	1253	39	61731856	986	1199	0.956903	61731851	61731856	6	AAAAGTCGGAGTGGTGTTTC	10_-_15275	NM_010438	-	'3'UTR'	61731603	61732656	423	89	238	124	325	0.935841	0.978022	0.955823	0.911765	0.933908
10	80808774	80808822	754	48	80808797	334	720	0.954907	80808790	80808797	8	ACTCAAGTTAATATTTGTGG	10_-_15353	NM_010440	-	'PA'	80808781	80808801	243	58	166	48	205	1	1	1	1	1
10	80672010	80672044	512	34	80672028	505	506	0.988281	80672027	80672028	2	AAAAAGAGAGAGAGAGAGAC	10_-_16467	NM_178662	-	'intron'	80670654	80672797	100	73	78	34	221	1	1	1	1	1
10	126662739	126662766	28	27	126662755	8	28	1	126662748	126662756	9	ACGACTTGCTGTTGCTTCTT	10_-_16572	NM_001039000	-	'PA'	126662741	126662761	6	1	3	9	9	1	1	1	1	1
10	26701171	26701217	197	46	26701201	145	188	0.954315	26701194	26701209	16	AAAATTCTTTCTGCACGGTG	10_-_16773	NM_008481	-	'3'UTR'	26701092	26701300	41	13	56	15	63	0.29927	0.19697	0.254545	0.1875	0.33871
10	26701259	26701295	65	36	26701282	35	63	0.969231	26701269	26701283	15	AGGAGAATTCATCAAAACAA	10_-_16773	NM_008481	-	'3'UTR'	26701092	26701300	9	4	26	8	16	0.0656934	0.0606061	0.118182	0.1	0.0860215
10	26809209	26809250	26	41	26809223	13	25	0.961538	26809223	26809249	27	AGTTTTGGATTTTTTGTTTG	10_-_16773	NM_008481	-	'intron'	26790175	26821134	2	7	7	0	9	0.0145985	0.106061	0.0318182	0	0.0483871
10	27325841	27325872	60	31	27325859	52	59	0.983333	27325851	27325859	9	AAAAGAGGAAAAGAAAAATT	10_-_16773	NM_008481	-	'intron'	27187181	27336502	13	5	12	8	21	0.0948905	0.0757576	0.0545455	0.1	0.112903
10	26701076	26701110	370	34	26701094	293	354	0.956757	26701092	26701095	4	AAATAAGTGCATGTTTTGTA	10_-_16773	NM_008481	-	'PA'	26701082	26701102	72	37	119	49	77	0.525547	0.560606	0.540909	0.6125	0.413978
10	80364092	80364128	305	36	80364109	182	292	0.957377	80364108	80364115	8	AGCCTCAGAGTAGATCTTCA	10_-_16907	NM_010722	-	'PA'	80364098	80364118	59	60	90	23	60	1	1	1	1	1
10	126975828	126975901	342	73	126975871	81	333	0.973684	126975847	126975878	32	AGCGAGCAAGCGAGCAAGCA	10_-_16971	NM_008512	-	'3'UTR'	126975214	126976005	98	34	62	29	110	0.933333	1	0.925373	0.878788	0.956522
10	127026203	127026227	22	24	127026216	17	21	0.954545	127026214	127026216	3	ACCATCTTGTGTCTCCTACT	10_-_16971	NM_008512	-	'intron'	127025667	127026610	7	0	5	4	5	0.0666667	0	0.0746269	0.121212	0.0434783
10	116714371	116714407	645	36	116714390	544	620	0.96124	116714389	116714391	3	ACAGGTTGTCTTTTCTTTCC	10_-_17105	NM_017372	-	'extend_3'TUR'	116709597	116714596	52	20	174	82	292	1	1	1	1	1
10	36853158	36853216	2367	58	36853179	982	2253	0.951838	36853177	36853182	6	AGAATCGTGTTATTAAGTCT	10_-_17118	NM_008538	-	'3'UTR'	36853049	36855913	574	245	397	211	826	0.0612986	0.0959655	0.0866056	0.0944494	0.0993385
10	36854592	36854666	11176	74	36854627	7631	10683	0.955888	36854623	36854634	12	ACAAATTTGTTGTGTTTTTT	10_-_17118	NM_008538	-	'3'UTR'	36853049	36855913	8074	2109	3811	1850	6809	0.862238	0.826087	0.83137	0.828111	0.818882
10	53624574	53624612	788	38	53624597	236	768	0.974619	53624591	53624597	7	ACCTCCTTCTGTGTCTTGTC	10_-_17155	NM_008548	-	'extend_3'TUR'	53620839	53625838	224	74	128	84	258	1	1	1	1	1
10	79855265	79855311	3027	46	79855286	1306	2906	0.960026	79855285	79855295	11	AACTCTGACTTGTCACTGTG	10_-_17192	NM_013595	-	'PA'	79855276	79855296	838	346	713	292	717	1	1	1	1	1
10	117125919	117125984	12981	65	117125951	5976	12770	0.983745	117125945	117125961	17	AAAGAGATTTGTCTTACACA	10_-_17246	NM_010786	-	'3'UTR'	117125931	117127265	4593	1112	2590	1223	3252	0.991152	0.995524	0.991957	0.995118	0.993584
10	75322076	75322125	12535	49	75322102	6872	12015	0.958516	75322099	75322104	6	ACCACGGTTGCCTCAGCTTC	10_-_17319	NM_010798	-	'PA'	75322088	75322108	3567	1332	3123	1819	4591	1	1	1	1	1
10	80128017	80128093	1097	76	80128077	409	1051	0.958067	80128067	80128077	11	AAAAATTTCTGTGCAGTGAC	10_-_17347	NM_021462	-	'PA'	80128064	80128084	413	78	201	80	279	1	1	1	1	1
10	75385949	75385987	828	38	75385969	611	797	0.96256	75385966	75385970	5	AAGCGCCTGTCTGTTTTTCT	10_-_17385	NM_008606	-	'PA'	75385959	75385979	198	66	195	88	250	1	1	1	1	1
10	127927892	127927951	30128	59	127927920	5519	29108	0.966144	127927916	127927923	8	CTCTTTTGGTTCTTTCTTTC	10_-_17904	NM_010860	-	'PA'	127927907	127927927	16098	8219	16614	6175	12977	1	1	1	1	1
10	127097956	127097997	1281	41	127097975	852	1245	0.971897	127097975	127097980	6	ATCCATGGCCCCCTTCCCCT	10_-_17937	NM_008668	-	'PA'	127097964	127097984	191	206	370	186	292	1	1	1	1	1
10	92147767	92147831	68	64	92147809	29	65	0.955882	92147795	92147822	28	AAAAGTGGAACAGGAGTAAG	10_-_17997	NM_008682	-	'3'UTR'	92147490	92148935	8	14	20	5	18	0.0851064	0.0945946	0.175439	0.0877193	0.130435
10	92148743	92148788	132	45	92148774	71	126	0.954545	92148764	92148775	12	AATCTTCCTAGTGGGGAAGT	10_-_17997	NM_008682	-	'3'UTR'	92147490	92148935	27	28	22	17	32	0.287234	0.189189	0.192982	0.298246	0.231884
10	92147473	92147511	377	38	92147491	276	360	0.954907	92147490	92147498	9	AGACAGTCTGAGCTTGAACC	10_-_17997	NM_008682	-	'PA'	92147480	92147500	59	106	72	35	88	0.62766	0.716216	0.631579	0.614035	0.637681
10	82211503	82211538	203	35	82211523	172	197	0.970443	82211519	82211524	6	AATCTTGTGTACATCGTAAC	10_-_18045	NM_010914	-	'3'UTR'	82211445	82213159	54	41	35	13	54	0.175896	0.262821	0.185185	0.136842	0.216
10	82212706	82212765	287	59	82212750	153	273	0.95122	82212740	82212752	13	ATTTTGAATGAAAGTTGCCT	10_-_18045	NM_010914	-	'3'UTR'	82211445	82213159	93	47	47	31	55	0.302932	0.301282	0.248677	0.326316	0.22
10	82212908	82212953	233	45	82212927	164	227	0.974249	82212922	82212928	7	ACGAGAGTTTGTTGCTCTGT	10_-_18045	NM_010914	-	'3'UTR'	82211445	82213159	85	41	39	18	44	0.276873	0.262821	0.206349	0.189474	0.176
10	82211430	82211488	231	58	82211446	98	226	0.978355	82211445	82211477	33	TTTGCGCCTTGCGTGTGGGT	10_-_18045	NM_010914	-	'PA'	82211435	82211455	54	17	56	22	77	0.175896	0.108974	0.296296	0.231579	0.308
10	7350465	7350511	425	46	7350488	279	408	0.96	7350481	7350489	9	AAAAATTAGTTTTGAAGAGT	10_-_18537	NM_008786	-	'3'UTR'	7350034	7357843	111	55	107	32	103	0.154596	0.130641	0.170382	0.128	0.163492
10	7357512	7357553	1333	41	7357535	740	1292	0.969242	7357530	7357536	7	AAAAGAAGCCATCATTCTTG	10_-_18537	NM_008786	-	'3'UTR'	7350034	7357843	376	222	276	126	292	0.523677	0.527316	0.43949	0.504	0.463492
10	7349158	7349195	491	37	7349179	330	487	0.991853	7349172	7349181	10	ACCCACCAGTCTGGATCCTT	10_-_18537	NM_008786	-	'extend_3'TUR'	7345034	7350033	125	76	127	43	116	0.174095	0.180523	0.202229	0.172	0.184127
10	7349974	7350012	439	38	7349996	299	419	0.954442	7349991	7349997	7	AAAAGAAGCATTGGTGGCCT	10_-_18537	NM_008786	-	'extend_3'TUR'	7345034	7350033	98	60	110	40	111	0.13649	0.142518	0.175159	0.16	0.17619
10	75813983	75814026	371	43	75814010	244	353	0.951482	75814008	75814011	4	CTTCTCCTGGCTACAGCCAT	10_-_18541	NM_008787	-	'3'UTR'	75813999	75814483	94	58	74	30	97	1	1	1	1	1
10	79784016	79784042	35	26	79784030	28	34	0.971429	79784029	79784032	4	AAGATGTCGAGTTTATGGTG	10_-_18551	NM_008793	-	'PA'	79784018	79784038	4	1	4	4	21	1	1	1	1	1
10	24361558	24361593	20	35	24361568	4	20	1	24361568	24361587	20	AGATCCTTTTGAAAGAGTCT	10_-_18605	NM_008813	-	'3'UTR'	24361217	24361611	4	6	2	3	5	0.166667	0.222222	0.0833333	0.1	0.0423729
10	24357705	24357736	100	31	24357722	80	95	0.95	24357719	24357724	6	AATATTTATTTATTTATTTA	10_-_18605	NM_008813	-	'extend_3'TUR'	24356217	24361216	9	11	10	15	50	0.375	0.407407	0.416667	0.5	0.423729
10	24358378	24358413	83	35	24358400	66	79	0.951807	24358391	24358400	10	AGTCTTGGCAGCTTGCCTAT	10_-_18605	NM_008813	-	'extend_3'TUR'	24356217	24361216	6	7	9	10	47	0.25	0.259259	0.375	0.333333	0.398305
10	24359996	24360022	30	26	24360009	20	29	0.966667	24360008	24360014	7	ATCTTAGCATTCTGCATCTT	10_-_18605	NM_008813	-	'extend_3'TUR'	24356217	24361216	5	3	3	2	16	0.208333	0.111111	0.125	0.0666667	0.135593
10	19580302	19580359	656	57	19580332	413	624	0.95122	19580323	19580334	12	ATATCATTTATGACATGTCA	10_-_18634	NM_008822	-	'3'UTR'	19579896	19580731	158	77	156	78	155	1	1	1	1	1
10	77450618	77450674	1387	56	77450652	478	1318	0.950252	77450642	77450655	14	AGCATGGTCACTGGGACAAC	10_-_18641	NM_008826	-	'3'UTR'	77449694	77450954	259	89	301	211	458	0.931655	0.908163	0.955556	0.96347	0.942387
10	90579513	90579561	11903	48	90579537	6869	11498	0.965975	90579534	90579539	6	ATGTCTATGAGTTTGTTATT	10_-_18674	NM_133668	-	'3'UTR'	90579323	90579708	10129	3258	6397	2981	6640	0.97198	0.955986	0.973816	0.974183	0.968071
10	127996118	127996153	435	35	127996136	219	432	0.993103	127996136	127996138	3	AAAAAGAAGAAAAAGAAGGT	10_-_18813	NM_011119	-	'exon'	127996118	127996171	177	71	91	36	57	0.226054	0.195055	0.16221	0.137931	0.117769
10	127994801	127994841	2030	40	127994820	564	1930	0.950739	127994819	127994824	6	TGTTGTGTGTTCTCTTTGTG	10_-_18813	NM_011119	-	'PA'	127994812	127994832	576	278	450	218	408	0.735632	0.763736	0.802139	0.835249	0.842975
10	120847389	120847432	1300	43	120847411	608	1241	0.954615	120847408	120847412	5	ATAAATTTGTATGTCTTTAT	10_-_192678	NM_138956	-	'PA'	120847397	120847417	314	197	238	139	353	1	1	1	1	1
10	75012854	75012888	78	34	75012876	26	75	0.961538	75012864	75012876	13	AAGTTTAAAGTGTGCAGCGG	10_-_192734	NM_198860	-	'PA'	75012860	75012880	28	3	21	3	20	1	1	1	1	1
10	128350634	128350660	32	26	128350649	28	32	1	128350644	128350649	6	AAAAAGCAGGTGTACAGAAA	10_-_19682	NM_134006	-	'PA'	128350637	128350657	16	2	5	0	9	1	1	1	0	1
10	60561370	60561415	4863	45	60561392	3588	4682	0.96278	60561390	60561399	10	AATCATTGGATGGTTGATTT	10_-_20397	NM_009163	-	'PA'	60561380	60561400	1277	511	1053	495	1346	0.974809	0.971483	0.985033	0.970588	0.977487
10	75359489	75359546	1726	57	75359520	1243	1685	0.976246	75359514	75359520	7	AATTTCTGTGCAGTAGCATA	10_-_20587	NM_011418	-	'PA'	75359504	75359524	294	250	504	184	453	1	1	1	1	1
10	41206963	41206998	332	35	41206979	95	323	0.972892	41206979	41206984	6	AGTGGCTCTACCTTGTTCCT	10_-_20598	NM_009213	-	'PA'	41206968	41206988	113	35	51	30	94	1	1	1	1	1
10	80105350	80105385	283	35	80105370	238	269	0.95053	80105366	80105372	7	AATCATCGAGTGCTATGTTG	10_-_208198	NM_145361	-	'PA'	80105352	80105372	85	26	62	18	78	1	1	1	1	1
10	80148755	80148810	59	55	80148779	20	58	0.983051	80148763	80148801	39	ATTTTTGGTTTTGTTTGTTT	10_-_208228	NM_172457	-	'3'UTR'	80147998	80149888	14	12	19	5	8	0.14433	0.2	0.157025	0.0925926	0.0769231
10	80147414	80147464	43	50	80147453	17	41	0.953488	80147425	80147454	30	ACTGCCCGGCCTACAGTTTT	10_-_208228	NM_172457	-	'extend_3'TUR'	80142998	80147997	3	4	13	7	14	0.0309278	0.0666667	0.107438	0.12963	0.134615
10	80147981	80148015	354	34	80147999	257	337	0.951977	80147996	80148001	6	ACTGCGGGCTGCTCCTTGTT	10_-_208228	NM_172457	-	'PA'	80147988	80148008	80	44	89	42	82	0.824742	0.733333	0.735537	0.777778	0.788462
10	24493605	24493632	28	27	24493620	18	28	1	24493618	24493622	5	AACCTTTAGAGTCATACTAT	10_-_209558	NM_134005	-	'PA'	24493610	24493630	5	3	4	5	11	1	1	1	1	1
10	127800136	127800178	514	42	127800154	270	493	0.959144	127800154	127800165	12	AATTTGTCATTTTTTGAGGG	10_-_210582	NM_001081040	-	'PA'	127800143	127800163	151	35	77	53	177	1	1	1	1	1
10	30415667	30415704	20	37	30415694	9	20	1	30415677	30415695	19	AAACACGGTGTCTTGTGATT	10_-_211329	NM_172495	-	'intron'	30414060	30415873	4	2	6	2	6	0.0655738	0.08	0.136364	0.0714286	0.0882353
10	30365374	30365412	212	38	30365390	74	206	0.971698	30365390	30365400	11	AATTTCTTTCCTAAAGACTC	10_-_211329	NM_001111267	-	'PA'	30365378	30365398	57	23	38	26	62	0.934426	0.92	0.863636	0.928571	0.911765
10	128106931	128106968	234	37	128106951	151	233	0.995726	128106943	128106957	15	ATGACTGGAATCTCTTGGGC	10_-_211389	NM_173733	-	'PA'	128106933	128106953	82	35	23	29	64	1	1	1	1	1
10	67007861	67007903	941	42	67007886	391	909	0.965994	67007877	67007888	12	ATCCTGAGTGAGACGCTGTC	10_-_211488	NM_001005419	-	'3'UTR'	67007259	67010750	204	190	212	76	227	0.569832	0.644068	0.602273	0.622951	0.627072
10	67008133	67008166	174	33	67008150	122	167	0.95977	67008149	67008156	8	AAAACAGTGTAATATGTTTT	10_-_211488	NM_001005419	-	'3'UTR'	67007259	67010750	49	28	42	10	38	0.136872	0.0949153	0.119318	0.0819672	0.104972
10	67010362	67010397	119	35	67010384	57	114	0.957983	67010375	67010384	10	AATCCCTCTTCCCTTCGGTG	10_-_211488	NM_001005419	-	'3'UTR'	67007259	67010750	28	25	26	9	26	0.0782123	0.0847458	0.0738636	0.0737705	0.0718232
10	67007241	67007275	196	34	67007260	156	192	0.979592	67007254	67007260	7	ACGTAGAAATAATGTTGCTT	10_-_211488	NM_001005419	-	'PA'	67007249	67007269	63	31	48	12	38	0.175978	0.105085	0.136364	0.0983607	0.104972
10	87936342	87936393	244	51	87936376	85	232	0.95082	87936368	87936377	10	AAATCTTTTCAGGTGTTTTT	10_-_212862	NM_144807	-	'3'UTR'	87936221	87938149	48	17	43	30	94	0.219178	0.193182	0.272152	0.265487	0.287462
10	87936900	87936949	96	49	87936932	78	92	0.958333	87936927	87936947	21	AATTGGACTGTCCTTTTAAT	10_-_212862	NM_144807	-	'3'UTR'	87936221	87938149	31	9	13	9	30	0.141553	0.102273	0.0822785	0.079646	0.0917431
10	87937877	87937919	80	42	87937906	30	76	0.95	87937888	87937908	21	AATAGGAAATTGTACCCCAA	10_-_212862	NM_144807	-	'3'UTR'	87936221	87938149	19	5	16	4	32	0.086758	0.0568182	0.101266	0.0353982	0.0978593
10	87932238	87932284	69	46	87932261	37	66	0.956522	87932247	87932267	21	AATTTGGTAAAAGTAGTTTT	10_-_212862	NM_001146690	-	'extend_3'TUR'	87930558	87935557	14	7	10	12	23	0.0639269	0.0795455	0.0632911	0.106195	0.0703364
10	87935506	87935596	274	90	87935560	116	264	0.963504	87935557	87935586	30	AATTCATATTTCTGCAATAT	10_-_212862	NM_001146690	-	'PA'	87935548	87935568	79	30	42	26	87	0.360731	0.340909	0.265823	0.230088	0.266055
10	87936209	87936243	146	34	87936229	98	142	0.972603	87936222	87936229	8	AAAACCGATTCTGTAAGGTT	10_-_212862	NM_144807	-	'PA'	87936211	87936231	20	15	31	25	51	0.0913242	0.170455	0.196203	0.221239	0.155963
10	33871261	33871319	439	58	33871300	198	431	0.981777	33871279	33871306	28	AATACCAAAGAACATGGAAC	10_-_212898	NM_172508	-	'3'UTR'	33871199	33872021	84	51	124	57	115	0.109091	0.0638298	0.112319	0.0725191	0.0867925
10	33871172	33871220	4530	48	33871197	2900	4329	0.955629	33871192	33871200	9	ATCTCTCCTGCTCTGGTGTG	10_-_212898	NM_172508	-	'PA'	33871189	33871209	669	748	979	727	1206	0.868831	0.93617	0.886775	0.924936	0.910189
10	89101449	89101481	151	32	89101466	114	146	0.966887	89101464	89101469	6	ATTTCTTTGGAACAGTTCAG	10_-_213326	NM_198021	-	'extend_3'TUR'	89097852	89102851	48	20	31	15	32	0.186047	0.131579	0.111913	0.0967742	0.113074
10	89101783	89101835	808	52	89101818	483	769	0.951733	89101812	89101820	9	ATTAAATGGCTGAATGTTCA	10_-_213326	NM_198021	-	'extend_3'TUR'	89097852	89102851	147	96	195	118	213	0.569767	0.631579	0.703971	0.76129	0.75265
10	89102294	89102339	94	45	89102309	63	91	0.968085	89102307	89102329	23	ATATTGTTTCAAGTATAGTA	10_-_213326	NM_198021	-	'extend_3'TUR'	89097852	89102851	27	17	23	8	16	0.104651	0.111842	0.0830325	0.0516129	0.0565371
10	89102827	89102868	125	41	89102854	80	119	0.952	89102846	89102856	11	AACTGGAAGTCCACCTGGTA	10_-_213326	NM_198021	-	'PA'	89102842	89102862	36	19	28	14	22	0.139535	0.125	0.101083	0.0903226	0.0777385
10	39609805	39609842	98	37	39609824	27	94	0.959184	39609820	39609833	14	TGTGACTGTTGACTGCTTTG	10_-_213332	NR_033628	-	'extend_3'TUR'	39607566	39612565	23	9	30	6	26	1	1	1	1	1
10	6379228	6379259	81	31	6379246	49	81	1	6379241	6379247	7	AAAGTAAATTTTCATTGAAT	10_-_213783	NM_001033253	-	'PA'	6379229	6379249	32	7	6	5	31	1	1	1	1	1
10	79872250	79872308	717	58	79872292	317	689	0.960948	79872286	79872292	7	AAAAGACCCAGTGTTGATCT	10_-_21423	NM_011548	-	'3'UTR'	79871910	79872876	180	116	150	85	158	0.269865	0.347305	0.282486	0.320755	0.280142
10	79872319	79872384	1576	65	79872340	634	1530	0.970812	79872339	79872369	31	AATTTATCGTCATATTTCAT	10_-_21423	NM_011548	-	'3'UTR'	79871910	79872876	451	191	344	167	377	0.676162	0.571856	0.647834	0.630189	0.66844
10	93432415	93432449	400	34	93432433	260	390	0.975	93432432	93432435	4	AACCGATGTGTGCTGGGGTT	10_-_215008	NM_172538	-	'3'UTR'	93430845	93432937	93	63	86	48	100	0.669065	0.777778	0.747826	0.786885	0.649351
10	93432906	93432939	165	33	93432922	75	160	0.969697	93432920	93432927	8	ATGGCCTTGATTGTTCTTTT	10_-_215008	NM_172538	-	'3'UTR'	93430845	93432937	46	18	29	13	54	0.330935	0.222222	0.252174	0.213115	0.350649
10	117170716	117170754	536	38	117170735	257	512	0.955224	117170733	117170739	7	ATACAGGCTGATAAGCAGTT	10_-_215436	NM_029875	-	'PA'	117170724	117170744	173	51	116	47	125	1	1	1	1	1
10	117252427	117252478	585	51	117252455	272	566	0.967521	117252446	117252466	21	ATATAGACTACTCCAGATAA	10_-_215449	NM_024457	-	'3'UTR'	117251653	117254429	156	79	145	63	123	0.0735156	0.0664424	0.0764768	0.0747331	0.0648051
10	117250906	117250942	612	36	117250926	533	591	0.965686	117250921	117250926	6	AAGACGGTCGTACTCGTTAT	10_-_215449	NM_024457	-	'extend_3'TUR'	117246653	117251652	130	91	134	73	163	0.061263	0.0765349	0.0706751	0.0865955	0.0858799
10	117251501	117251544	2014	43	117251521	990	1937	0.961768	117251521	117251529	9	AATAGGTGTTATTTTACACA	10_-_215449	NM_024457	-	'extend_3'TUR'	117246653	117251652	514	298	435	212	478	0.242224	0.250631	0.22943	0.251483	0.251844
10	117251569	117251684	5038	115	117251600	2387	4854	0.963478	117251589	117251657	69	AGTTACTTGCCACTGAATGT	10_-_215449	NM_024457	-	'extend_3'TUR'	117246653	117251652	1322	721	1182	495	1134	0.622997	0.606392	0.623418	0.587189	0.597471
10	7487725	7487771	3888	46	7487747	2638	3840	0.987654	7487746	7487754	9	AATTGCTTTATTTTTAATTT	10_-_215751	NM_145418	-	'PA'	7487735	7487755	915	553	783	506	1083	1	1	1	1	1
10	12933180	12933221	59	41	12933208	17	57	0.966102	12933190	12933210	21	CCCTGTCTTCATTATCTCCA	10_-_215789	NM_001033257	-	'3'UTR'	12927523	12934063	15	11	11	5	15	0.145631	0.215686	0.112245	0.119048	0.103448
10	12933362	12933394	44	32	12933377	14	42	0.954545	12933374	12933381	8	ATGCTTGCTCGCACTGTGTT	10_-_215789	NM_001033257	-	'3'UTR'	12927523	12934063	10	7	12	6	7	0.0970874	0.137255	0.122449	0.142857	0.0482759
10	13163329	13163362	117	33	13163348	71	112	0.957265	13163344	13163350	7	TTAAAAAGATAAGAAAAATA	10_-_215789	NM_001195065	-	'intron'	13011769	13193861	26	3	28	8	47	0.252427	0.0588235	0.285714	0.190476	0.324138
10	12927502	12927540	208	38	12927524	169	198	0.951923	12927518	12927525	8	AGTCTTAGTCCATTACTGTT	10_-_215789	NM_001033257	-	'PA'	12927513	12927533	42	26	43	21	66	0.407767	0.509804	0.438776	0.5	0.455172
10	14124445	14124480	151	35	14124466	102	150	0.993377	14124458	14124467	10	ATTATGGCAAATATTGAATA	10_-_215798	NM_001002268	-	'3'UTR'	14122391	14127703	40	4	41	22	43	0.203046	0.148148	0.277027	0.333333	0.27044
10	14122372	14122412	455	40	14122392	243	447	0.982418	14122387	14122400	14	AAATTATTCAGTTCCTTTAT	10_-_215798	NM_001002268	-	'PA'	14122381	14122401	157	23	107	44	116	0.796954	0.851852	0.722973	0.666667	0.72956
10	17936718	17936746	27	28	17936734	12	26	0.962963	17936728	17936737	10	ATGGTTATGAAGATGGCATT	10_-_215814	NM_144820	-	'intron'	17936089	17939293	15	2	1	1	7	0.333333	0.1	0.0666667	0.142857	0.170732
10	17937946	17937984	20	38	17937971	6	20	1	17937956	17937979	24	CTTAAGGGAGCTAGGGAGAT	10_-_215814	NM_144820	-	'intron'	17936089	17939293	3	9	4	0	4	0.0666667	0.45	0.266667	0	0.097561
10	17933469	17933503	84	34	17933491	33	82	0.97619	17933482	17933491	10	AAATCGTCATCTCTGTTTTC	10_-_215814	NM_144820	-	'PA'	17933481	17933501	27	9	10	6	30	0.6	0.45	0.666667	0.857143	0.731707
10	42032376	42032404	51	28	42032392	41	50	0.980392	42032388	42032392	5	ATTGAGCTTGTCTGATTCAT	10_-_215951	NM_145743	-	'PA'	42032381	42032401	14	6	10	9	11	1	1	1	1	1
10	58909715	58909751	749	36	58909734	614	713	0.951936	58909732	58909735	4	AATCATGGCATCTCGTTCTT	10_-_215999	NM_001033259	-	'PA'	58909722	58909742	229	86	146	73	179	0.966245	0.966292	0.993197	0.924051	0.983516
10	63392604	63392666	42	62	63392616	12	40	0.952381	63392614	63392657	44	AGCTAAGTTGTGCAGTATTT	10_-_216028	NM_178678	-	'3'UTR'	63391245	63392805	23	2	4	1	10	1	1	1	1	1
10	67349919	67349982	62	63	67349940	17	59	0.951613	67349937	67349974	38	AACTCATCGTTTTCAGATAC	10_-_216049	NM_178679	-	'3'UTR'	67348853	67351577	19	2	12	7	19	0.0979381	0.0243902	0.0710059	0.0921053	0.0989583
10	67348835	67348882	688	47	67348855	542	654	0.950581	67348852	67348856	5	AACACTTTGGTCTGTTCCTT	10_-_216049	NM_178679	-	'PA'	67348843	67348863	175	80	157	69	173	0.902062	0.97561	0.928994	0.907895	0.901042
10	70717710	70717750	1079	40	70717731	681	1055	0.977757	70717728	70717732	5	ATTCGTCTTGACTACTTAAT	10_-_216080	NM_145420	-	'PA'	70717718	70717738	310	135	217	121	272	1	1	1	1	1
10	75930842	75930869	28	27	75930858	15	27	0.964286	75930850	75930858	9	ATATATGTTCTTCTCGTACA	10_-_216119	NM_172550	-	'intron'	75929111	75930901	8	6	7	3	3	1	1	1	1	1
10	77649510	77649578	354	68	77649535	266	338	0.954802	77649530	77649558	29	ACTGGTGTGGAAGTCATAGA	10_-_216131	NM_001081055	-	'3'UTR'	77649471	77650600	104	41	68	32	93	0.66242	0.706897	0.62963	0.561404	0.632653
10	77648153	77648185	58	32	77648170	48	56	0.965517	77648169	77648176	8	AAACTCCGTTTGAACTTGGG	10_-_216131	NM_001081055	-	'extend_3'TUR'	77644471	77649470	12	9	10	4	21	0.0764331	0.155172	0.0925926	0.0701754	0.142857
10	77649457	77649494	139	37	77649473	86	133	0.956835	77649470	77649474	5	AAAGTGATGTATTTTTGTAT	10_-_216131	NM_001081055	-	'PA'	77649461	77649481	41	8	30	21	33	0.261146	0.137931	0.277778	0.368421	0.22449
10	79081453	79081484	42	31	79081472	19	41	0.97619	79081466	79081473	8	AGATGATATTGGTACTCCTC	10_-_216148	NM_001024539	-	'3'UTR'	79080683	79083803	5	3	4	8	21	0.045045	0.115385	0.0625	0.216216	0.168
10	79081512	79081548	298	36	79081533	158	292	0.979866	79081527	79081534	8	AAAGCAAACGTGTAAAAGGA	10_-_216148	NM_001024539	-	'3'UTR'	79080683	79083803	97	19	56	25	95	0.873874	0.730769	0.875	0.675676	0.76
10	79082234	79082260	31	26	79082248	27	30	0.967742	79082248	79082250	3	AGCCTGCTGTGTCTGCTAGG	10_-_216148	NM_001024539	-	'3'UTR'	79080683	79083803	9	4	4	4	9	0.0810811	0.153846	0.0625	0.108108	0.072
10	79198902	79198934	114	32	79198917	48	112	0.982456	79198916	79198922	7	ATGCCAGCCGCCACTTTCTG	10_-_216151	NM_172551	-	'3'UTR'	79198870	79198978	37	14	29	11	21	0.330357	0.285714	0.333333	0.314286	0.272727
10	79198846	79198893	261	47	79198874	96	248	0.950192	79198866	79198882	17	AATGAGACGCTGCGCTCGGC	10_-_216151	NM_172551	-	'PA'	79198860	79198880	75	35	58	24	56	0.669643	0.714286	0.666667	0.685714	0.727273
10	79327509	79327538	29	29	79327527	24	28	0.965517	79327516	79327527	12	ACGTGGTCTGGAATTTTTTT	10_-_216152	NR_033210	-	'PA'	79327516	79327536	11	1	0	4	12	1	1	0	1	1
10	79357436	79357471	308	35	79357455	149	301	0.977273	79357452	79357458	7	AGGCTTTGGCTGTCACCGTG	10_-_216154	NM_001163276	-	'PA'	79357442	79357462	91	33	81	23	73	1	1	1	1	1
10	79439845	79439883	1374	38	79439865	1153	1334	0.970888	79439863	79439866	4	TGGCCGTGTAGTTCCTCAGC	10_-_216157	NM_001003949	-	'PA'	79439855	79439875	396	149	253	109	427	1	1	1	1	1
10	79533352	79533378	39	26	79533366	35	39	1	79533365	79533367	3	ATCTGTATGTCTCTAGATTG	10_-_216161	NM_183426	-	'intron'	79532797	79535101	15	12	2	2	8	0.16129	0.162162	0.0263158	0.0273973	0.034632
10	79519727	79519778	492	51	79519760	327	480	0.97561	79519743	79519765	23	ATATGTGCCTTTTGCTTACT	10_-_216161	NM_183426	-	'PA'	79519749	79519769	71	61	68	64	216	0.763441	0.824324	0.894737	0.876712	0.935065
10	80046378	80046417	1143	39	80046400	767	1123	0.982502	80046394	80046401	8	AGGGTTGCTTGGCTCCTTTG	10_-_216169	NM_145421	-	'PA'	80046384	80046404	379	124	234	87	299	1	1	1	1	1
10	82953102	82953154	74	52	82953140	35	72	0.972973	82953114	82953143	30	AAATGGCTTAACCTCTTTTT	10_-_216188	NM_153543	-	'3'UTR'	82950192	82953323	15	6	22	10	19	0.0630252	0.146341	0.0833333	0.0925926	0.0892019
10	82950178	82950218	770	40	82950200	589	734	0.953247	82950194	82950201	8	AAAAAGTTCTTTTCTCCTTT	10_-_216188	NM_153543	-	'PA'	82950182	82950202	211	33	217	88	185	0.886555	0.804878	0.82197	0.814815	0.868545
10	83076290	83076324	89	34	83076311	46	86	0.966292	83076303	83076312	10	AAAAAGACACATAGTGCCTT	10_-_216190	NM_145220	-	'intron'	83075646	83076888	25	7	14	7	33	0.271739	0.225806	0.233333	0.194444	0.24812
10	83062763	83062796	278	33	83062781	228	266	0.956835	83062779	83062781	3	AAACTGCTTATTGTGGTTAG	10_-_216190	NM_145220	-	'PA'	83062769	83062789	67	24	46	29	100	0.728261	0.774194	0.766667	0.805556	0.75188
10	83989019	83989077	5437	58	83989051	3605	5217	0.959537	83989048	83989060	13	AGTCAGTGGGTTCTGAGAAC	10_-_216197	NM_175451	-	'PA'	83989040	83989060	1403	700	1205	693	1216	0.990819	0.985915	0.986088	0.985775	0.981437
10	94874117	94874154	205	37	94874139	178	198	0.965854	94874134	94874139	6	ACAAGTTGCACTCATTACTT	10_-_216233	NM_007706	-	'3'UTR'	94874124	94875286	4	38	44	35	77	1	1	1	1	1
10	105200290	105200321	100	31	105200307	66	98	0.98	105200303	105200310	8	AAAATCATAGTGTTTTCATT	10_-_216292	NM_207522	-	'3'UTR'	105200241	105200415	17	10	39	9	23	1	1	1	1	1
10	114727159	114727309	2482	150	114727247	360	2370	0.954875	114727207	114727266	60	ACAAGCGCAAGGTGCAAAAA	10_-_216344	NM_024454	-	'3'UTR'	114726918	114727827	607	291	581	267	624	0.345475	0.410437	0.389933	0.407634	0.384473
10	114724116	114724167	970	51	114724144	423	923	0.951546	114724138	114724150	13	AAAAACAAACCCTCGCCCTA	10_-_216344	NM_024454	-	'extend_3'TUR'	114721918	114726917	292	87	215	93	236	0.166192	0.122708	0.144295	0.141985	0.14541
10	114724334	114724384	417	50	114724368	254	400	0.959233	114724362	114724370	9	AGTTGCACGTACTTGGATTC	10_-_216344	NM_024454	-	'extend_3'TUR'	114721918	114726917	114	37	124	37	88	0.0648833	0.0521862	0.0832215	0.0564885	0.0542206
10	114724561	114724604	980	43	114724581	393	948	0.967347	114724577	114724585	9	AGTTTGCTTTGTTCCTTTTC	10_-_216344	NM_024454	-	'extend_3'TUR'	114721918	114726917	299	91	206	86	266	0.170176	0.12835	0.138255	0.131298	0.163894
10	114726343	114726378	393	35	114726362	256	374	0.951654	114726359	114726363	5	AGACGGGACGGTCCCTGGAT	10_-_216344	NM_024454	-	'extend_3'TUR'	114721918	114726917	100	59	70	47	98	0.0569152	0.0832158	0.0469799	0.0717557	0.060382
10	114726902	114726936	329	34	114726919	164	321	0.975684	114726918	114726923	6	AGTGTTGTTTTAGAATGGTT	10_-_216344	NM_024454	-	'PA'	114726908	114726928	94	43	82	37	65	0.0535003	0.0606488	0.0550336	0.0564885	0.0400493
10	116343806	116343853	1391	47	116343832	694	1350	0.970525	116343829	116343834	6	AGTGCGTGTGTCTTTCTTAG	10_-_216363	NM_001003950	-	'3'UTR'	116342840	116344091	390	268	393	117	182	0.874439	0.890365	0.911833	0.860294	0.850467
10	116342821	116342852	111	31	116342837	73	110	0.990991	116342835	116342840	6	AGAGGTTGGGTTATTTTCTG	10_-_216363	NM_001003950	-	'PA'	116342830	116342850	36	20	21	13	20	0.0807175	0.0664452	0.0487239	0.0955882	0.0934579
10	121518161	121518208	267	47	121518185	108	255	0.955056	121518172	121518190	19	AAGCTTGAACTGGCAGGATG	10_-_216395	NM_153059	-	'extend_3'TUR'	121513316	121518315	68	32	54	34	67	0.110569	0.115108	0.116883	0.131274	0.12204
10	121518288	121518337	1906	49	121518317	824	1877	0.984785	121518310	121518321	12	ACCATGTATTCATAAGTGTA	10_-_216395	NM_153059	-	'PA'	121518306	121518326	537	243	396	222	479	0.873171	0.874101	0.857143	0.857143	0.872495
10	126492056	126492091	116	35	126492074	73	111	0.956897	126492067	126492080	14	AAAGTCAGACCCAGAGGGCT	10_-_216438	NM_001033262	-	'extend_3'TUR'	126488106	126493105	46	4	22	6	33	0.505495	0.4	0.407407	0.315789	0.445946
10	126493090	126493123	141	33	126493106	58	137	0.971631	126493105	126493111	7	CGTGGGGCCTCCTTTCTCAT	10_-_216438	NM_001033262	-	'PA'	126493096	126493116	45	6	32	13	41	0.494505	0.6	0.592593	0.684211	0.554054
10	126532689	126532724	649	35	126532708	515	630	0.970724	126532705	126532709	5	AAGCCATCAGGCTCTGTGGG	10_-_216440	NM_001171026	-	'3'UTR'	126531315	126533302	179	77	139	55	180	0.675472	0.875	0.798851	0.785714	0.72
10	126531293	126531339	222	46	126531323	58	217	0.977477	126531314	126531327	14	TGGCGGTAGAGTTTGCGGAC	10_-_216440	NM_001171026	-	'PA'	126531305	126531325	86	11	35	15	70	0.324528	0.125	0.201149	0.214286	0.28
10	126733260	126733306	2238	46	126733284	1126	2222	0.992851	126733278	126733291	14	AAGCCGAGCCCTCTCCTGGT	10_-_216443	NM_001003913	-	'PA'	126733267	126733287	591	268	536	226	601	1	1	1	1	1
10	70690666	70690703	771	37	70690687	512	752	0.975357	70690683	70690688	6	AAACATGTTTCTGAAATTAT	10_-_21780	NM_009360	-	'3'UTR'	70688225	70691306	223	91	157	74	207	0.895582	0.669118	0.765854	0.804348	0.775281
10	70688196	70688237	202	41	70688218	86	197	0.975248	70688212	70688221	10	AATTTGAAACCTGTTTTTTT	10_-_21780	NM_009360	-	'PA'	70688215	70688235	26	45	48	18	60	0.104418	0.330882	0.234146	0.195652	0.224719
10	90611840	90611879	762	39	90611860	380	755	0.990814	90611855	90611864	10	AAAAGATTTATGACTTATTC	10_-_21917	NM_001283048	-	'3'UTR'	90610316	90612220	125	217	229	84	100	0.372024	0.371575	0.31456	0.319392	0.3367
10	90610297	90610336	1073	39	90610317	840	1045	0.973905	90610316	90610318	3	AGTTTTGTTGTTGAATACAT	10_-_21917	NM_001283048	-	'PA'	90610306	90610326	129	256	377	132	151	0.383929	0.438356	0.517857	0.501901	0.508418
10	90623135	90623180	404	45	90623164	324	386	0.955446	90623158	90623165	8	AACAGTTTTGTGTGGTCTCC	10_-_21917	NM_011605	-	'PA'	90623152	90623172	79	105	111	45	46	0.235119	0.179795	0.152473	0.171103	0.154882
10	18720703	18720734	103	31	18720719	74	99	0.961165	18720716	18720722	7	AAATTCTGATGCTTTCTGTT	10_-_21929	NM_009397	-	'PA'	18720707	18720727	40	24	4	13	18	1	1	1	1	1
10	86161064	86161116	1688	52	86161096	1086	1607	0.952014	86161093	86161099	7	AAGAAGAAGAAAAGAAACCA	10_-_22027	NM_011631	-	'exon'	86161064	86161183	998	121	197	116	175	0.199401	0.0278481	0.0257887	0.0274621	0.0274467
10	86161120	86161161	2175	41	86161143	2129	2129	0.978851	86161143	86161143	1	AAAAGAAGAGAAAGAAGAAT	10_-_22027	NM_011631	-	'exon'	86161064	86161183	679	322	462	239	427	0.135664	0.0741082	0.0604791	0.0565814	0.0669699
10	86153527	86153647	16815	120	86153590	7189	16001	0.951591	86153582	86153590	9	AAATACTCAGTGCTTATTTT	10_-_22027	NM_011631	-	'PA'	86153576	86153596	3292	3878	6943	3853	5739	0.657742	0.89252	0.908889	0.912169	0.900094
10	12101969	12102010	2209	41	12101992	1667	2183	0.98823	12101986	12101992	7	AAAATGACTTTGATGTTTGG	10_-_22288	NM_011682	-	'PA'	12101976	12101996	606	281	475	239	582	0.974277	0.939799	0.938735	0.959839	0.935691
10	4699627	4699653	43	26	4699641	39	42	0.976744	4699641	4699642	2	AATATTGTGGTTTCCTTTAT	10_-_22353	NM_011702	-	'3'UTR'	4698927	4701585	4	0	4	14	20	0.235294	0	0.0784314	0.229508	0.178571
10	4698909	4698945	214	36	4698927	176	204	0.953271	4698925	4698928	4	AAATGTGTATTCTTGTTCTG	10_-_22353	NM_011702	-	'PA'	4698917	4698937	13	5	47	47	92	0.764706	1	0.921569	0.770492	0.821429
10	25994254	25994296	783	42	25994277	591	754	0.962963	25994274	25994278	5	AGATTCTTTTTATATATGTA	10_-_237339	NM_172787	-	'extend_3'TUR'	25990258	25995257	352	80	90	33	199	1	1	1	1	1
10	60659844	60659877	108	33	60659862	50	104	0.962963	60659856	60659865	10	AATATTGCCCTTGGTGTTTT	10_-_237360	NM_001081127	-	'PA'	60659850	60659870	19	3	35	13	34	1	1	1	1	1
10	77362542	77362567	30	25	77362556	26	29	0.966667	77362555	77362556	2	AAGCTATGTCGTCATCGAGT	10_-_237387	NM_145152	-	'3'UTR'	77360320	77363571	13	3	4	2	7	0.317073	0.25	0.25	0.25	0.333333
10	77362580	77362624	22	44	77362590	5	21	0.954545	77362590	77362616	27	ATTTACTGTCCTTTTGTATA	10_-_237387	NM_145152	-	'3'UTR'	77360320	77363571	8	4	4	3	2	0.195122	0.333333	0.25	0.375	0.0952381
10	77360305	77360336	49	31	77360323	28	48	0.979592	77360316	77360326	11	AAAGCTGATTGGGATTCTGT	10_-_237387	NM_145152	-	'PA'	77360310	77360330	20	5	8	3	12	0.487805	0.416667	0.5	0.375	0.571429
10	79843198	79843276	179	78	79843227	40	175	0.977654	79843212	79843264	53	AATCTTTGACAGCTAAATCA	10_-_237400	NM_198615	-	'3'UTR'	79843100	79843969	20	35	52	50	18	0.0746269	0.172414	0.176871	0.240385	0.0837209
10	79843083	79843123	1060	40	79843102	578	1013	0.95566	79843102	79843109	8	AAGCGCTGGCGTTCGCGTGG	10_-_237400	NM_198615	-	'PA'	79843090	79843110	248	168	242	158	197	0.925373	0.827586	0.823129	0.759615	0.916279
10	81689320	81689383	230	63	81689337	192	222	0.965217	81689334	81689338	5	ATTTCAACTCTTCTCAATAT	10_-_237411	NM_001105557	-	'exon'	81687602	81689338	49	28	43	35	67	0.295181	0.378378	0.325758	0.353535	0.374302
10	81690165	81690214	205	49	81690182	96	199	0.970732	81690181	81690204	24	AGTTTTGTGAGGAGTTTTAA	10_-_237411	NM_001105557	-	'intron'	81689339	81690275	69	16	30	28	56	0.415663	0.216216	0.227273	0.282828	0.312849
10	81687580	81687614	202	34	81687599	160	195	0.965347	81687591	81687600	10	AAAATGTTATTTATGTTGTC	10_-_237411	NM_001105557	-	'PA'	81687592	81687612	41	23	46	31	54	0.246988	0.310811	0.348485	0.313131	0.301676
10	88871603	88871631	48	28	88871617	21	46	0.958333	88871616	88871620	5	TATGTATTTCCTGGGCTGTT	10_-_237436	NM_001033331	-	'3'UTR'	88871568	88875947	7	12	11	10	6	0.411765	0.244898	0.211538	0.232558	0.162162
10	88871993	88872027	83	34	88872008	42	82	0.987952	88872006	88872016	11	ACTCTGTTTGCTTTTTTAAT	10_-_237436	NM_001033331	-	'3'UTR'	88871568	88875947	6	18	17	25	16	0.352941	0.367347	0.326923	0.581395	0.432432
10	88871555	88871589	71	34	88871575	35	70	0.985915	88871568	88871580	13	AAGTTTTATGTTTGCCTAAC	10_-_237436	NM_001033331	-	'PA'	88871558	88871578	4	19	24	8	15	0.235294	0.387755	0.461538	0.186047	0.405405
10	99906518	99906562	1011	44	99906537	458	982	0.971316	99906536	99906546	11	AGCCTGATTGTCTTGTGATG	10_-_237500	NM_001110013	-	'PA'	99906526	99906546	275	150	208	125	224	1	1	1	1	1
10	106999373	106999402	67	29	106999389	57	64	0.955224	106999384	106999390	7	AAACATAATTTGTGGTTACT	10_-_237523	NM_001081432	-	'intron'	106980475	107000190	31	0	8	4	21	1	0	1	1	1
10	109157021	109157046	23	25	109157034	18	23	1	109157034	109157037	4	AAAAAGAAGAAGAAAAACTG	10_-_260315	NM_001081035	-	'exon'	109157013	109157134	5	3	8	0	7	0.217391	0.0967742	0.177778	0	0.166667
10	109118617	109118649	138	32	109118634	90	135	0.978261	109118631	109118636	6	AACAAGGTGTGGTGTCTATG	10_-_260315	NM_001081035	-	'extend_3'TUR'	109115495	109120494	18	28	37	17	35	0.782609	0.903226	0.822222	1	0.833333
10	31221782	31221822	196	40	31221802	98	188	0.959184	31221797	31221806	10	ATGTGCTTGCCTATTTCCAT	10_-_268291	NM_001146349	-	'3'UTR'	31221693	31222463	41	20	50	23	54	0.117816	0.117647	0.194553	0.137725	0.165138
10	31219802	31219854	110	52	31219816	24	110	1	31219816	31219845	30	ACCCATTGTTTTCTTGGGAG	10_-_268291	NM_001146349	-	'extend_3'TUR'	31216693	31221692	23	15	22	18	32	0.066092	0.0882353	0.0856031	0.107784	0.0978593
10	31221670	31221712	990	42	31221694	819	941	0.950505	31221690	31221694	5	AGATTGTTTCCATGGTAACT	10_-_268291	NM_001146349	-	'PA'	31221683	31221703	276	130	176	125	234	0.793103	0.764706	0.684825	0.748503	0.715596
10	6190398	6190453	763	55	6190436	496	746	0.97772	6190427	6190438	12	AAAACCGTGTTCAGCTAGTA	10_-_270685	NM_001170786	-	'3'UTR'	6190411	6198442	125	143	185	124	169	0.753012	0.979452	0.989305	1	0.871134
10	6339156	6339184	73	28	6339171	44	71	0.972603	6339170	6339173	4	TTTTTTTCTTTAAAAAAAAA	10_-_270685	NM_001170786	-	'intron'	6338800	6356543	41	3	2	0	25	0.246988	0.0205479	0.0106952	0	0.128866
10	60782392	60782424	147	32	60782410	94	142	0.965986	60782405	60782411	7	AACATACTGCTTTGCTGATT	10_-_27355	NM_013753	-	'PA'	60782395	60782415	37	22	33	19	31	1	1	1	1	1
10	128061567	128061641	12213	74	128061593	7527	11692	0.957341	128061588	128061596	9	ACATGGCATCGGAGTGTGTT	10_-_27370	NM_013765	-	'PA'	128061575	128061595	9891	4596	8213	3650	9641	1	1	1	1	1
10	104624706	104624736	93	30	104624722	84	89	0.956989	104624719	104624722	4	AAATATGTTGTGTGGGGCCT	10_-_278279	NM_177368	-	'PA'	104624710	104624730	22	10	16	12	29	1	1	1	1	1
10	85401358	85401407	2941	49	85401382	1754	2799	0.951717	85401378	85401384	7	TCCTTTCTTCTCTTCCTGTG	10_-_28088	NM_145422	-	'PA'	85401372	85401392	900	354	548	265	732	1	1	1	1	1
10	66476405	66476449	812	44	66476432	469	772	0.950739	66476425	66476433	9	AACTTCATTTTCTAACCTGA	10_-_28193	NM_001204915	-	'3'UTR'	66471937	66476515	203	101	182	92	194	0.398039	0.347079	0.345351	0.335766	0.365348
10	66471919	66471961	1291	42	66471938	498	1257	0.973664	66471937	66471947	11	AGCTGAGTATTTTTTTTTCT	10_-_28193	NM_001204915	-	'PA'	66471927	66471947	280	176	314	166	321	0.54902	0.604811	0.595825	0.605839	0.60452
10	77624794	77624840	717	46	77624823	322	693	0.966527	77624811	77624827	17	AAACTCCTTTCAGCTATGTC	10_-_28295	NM_138601	-	'3'UTR'	77624812	77625334	225	63	114	76	215	1	1	1	1	1
10	20116839	20116875	114	36	20116859	83	109	0.95614	20116856	20116864	9	ATCACAGTATAAAAATATCC	10_-_29863	NM_013875	-	'extend_3'TUR'	20112810	20117809	24	6	12	10	57	1	1	1	1	1
10	80362389	80362427	202	38	80362412	157	193	0.955446	80362409	80362413	5	ACACCTGTCTGCCCAGCACT	10_-_30055	NM_013895	-	'3'UTR'	80362195	80362905	57	15	56	11	54	0.146907	0.0877193	0.136253	0.06875	0.120536
10	80362630	80362675	1424	45	80362657	1126	1360	0.955056	80362652	80362660	9	AAAGCAGGCGTGTCACCTCA	10_-_30055	NM_013895	-	'3'UTR'	80362195	80362905	325	149	349	149	388	0.837629	0.871345	0.849148	0.93125	0.866071
10	61918000	61918046	2535	46	61918023	1695	2420	0.954635	61918017	61918025	9	AAACTTAAGTTTGTAGTTTA	10_-_30930	NM_001113355	-	'3'UTR'	61917591	61919492	574	271	610	363	602	0.777778	0.816265	0.782051	0.864286	0.774775
10	61918695	61918734	191	39	61918719	87	183	0.958115	61918715	61918723	9	ATATATTTTTTAATTTAAGG	10_-_30930	NM_001113355	-	'3'UTR'	61917591	61919492	56	20	47	16	44	0.0758808	0.060241	0.0602564	0.0380952	0.0566281
10	80921956	80921994	245	38	80921973	118	236	0.963265	80921972	80921981	10	ATTATCTGTCACCTTGTTTT	10_-_319586	NM_176954	-	'PA'	80921963	80921983	129	4	19	9	75	1	1	1	1	1
10	34023398	34023432	319	34	34023416	219	304	0.952978	34023413	34023418	6	AGATGTTTGTATTATTGAAT	10_-_319638	NM_176968	-	'PA'	34023408	34023428	69	31	71	45	88	1	1	1	1	1
10	21833118	21833144	22	26	21833131	11	21	0.954545	21833127	21833136	10	TCCCAATGTCCCCTTTACAT	10_-_319887	NM_001254744	-	'3'UTR'	21832856	21833937	11	3	1	2	4	0.174603	0.115385	0.047619	0.285714	0.1
10	21864090	21864121	142	31	21864106	92	136	0.957746	21864105	21864108	4	AATGACTGCCTTGGTTTTAT	10_-_319887	NM_001254745	-	'PA'	21864100	21864120	52	23	20	5	36	0.825397	0.884615	0.952381	0.714286	0.9
10	110380749	110380778	34	29	110380767	15	34	1	110380757	110380767	11	ATACTAAGTCATACTATTTT	10_-_320150	NM_172554	-	'3'UTR'	110378836	110381448	11	5	8	6	4	0.106796	0.0980392	0.0888889	0.113208	0.0454545
10	110378819	110378854	365	35	110378838	299	351	0.961644	110378835	110378839	5	AAATGTGGTGTCTGCTCAGT	10_-_320150	NM_172554	-	'PA'	110378826	110378846	92	46	82	47	84	0.893204	0.901961	0.911111	0.886792	0.954545
10	120218134	120218180	5864	46	120218161	4107	5790	0.987381	120218152	120218161	10	AAAAATGTCTCTCTTCTCTG	10_-_320183	NM_177092	-	'PA'	120218147	120218167	1158	1161	1277	676	1518	0.967419	0.988927	0.981553	0.981132	0.983161
10	9342723	9342764	609	41	9342745	259	597	0.980296	9342740	9342751	12	GTTCCAGCTTGGCCTCTCTT	10_-_320825	NM_177271	-	'extend_3'TUR'	9342057	9347056	153	57	104	67	216	0.854749	0.791667	0.776119	0.728261	0.874494
10	9347038	9347071	109	33	9347057	80	104	0.954128	9347050	9347058	9	AAAAAGGGCCCTGGGGTCCT	10_-_320825	NM_177271	-	'PA'	9347047	9347067	22	9	24	22	27	0.122905	0.125	0.179104	0.23913	0.109312
10	116506464	116506498	517	34	116506482	392	506	0.978723	116506480	116506484	5	ACGTAAAGTTTTACTGTATT	10_-_327826	NM_177798	-	'extend_3'TUR'	116502183	116507182	157	56	79	66	148	0.301344	0.231405	0.206806	0.293333	0.319654
10	116507061	116507095	221	34	116507079	117	210	0.950226	116507076	116507083	8	AGGCCGAGTGTGGCTTTGTG	10_-_327826	NM_177798	-	'extend_3'TUR'	116502183	116507182	92	19	25	25	49	0.176583	0.0785124	0.065445	0.111111	0.105832
10	116507156	116507201	1175	45	116507179	516	1117	0.950638	116507177	116507186	10	GTCACTGGCCCTCTGGCCCC	10_-_327826	NM_177798	-	'PA'	116507173	116507193	272	167	278	134	266	0.522073	0.690083	0.727749	0.595556	0.574514
10	81206817	81206861	75	44	81206847	45	72	0.96	81206842	81206852	11	ATAATTATATACTGCCATCC	10_-_331188.1	NM_199062	-	'3'UTR'	81205566	81208727	18	5	16	7	26	1	1	1	1	1
10	81366204	81366233	23	29	81366220	13	23	1	81366211	81366226	16	ATCCCAGAGAAAAGTCAATG	10_-_331188.2	NM_199062_dup1	-	'3'UTR'	81364656	81367817	5	2	3	4	9	1	1	1	1	1
10	61891946	61892020	93	74	61892003	16	89	0.956989	61891958	61892008	51	AAATTACTTATTATAGCCTT	10_-_338359	NM_181423	-	'extend_3'TUR'	61887126	61892125	12	17	24	14	22	0.0869565	0.195402	0.180451	0.208955	0.15942
10	61892063	61892101	115	38	61892081	41	111	0.965217	61892076	61892091	16	ACTATCTGGTTTGTTTGTTT	10_-_338359	NM_181423	-	'extend_3'TUR'	61887126	61892125	34	14	32	10	21	0.246377	0.16092	0.240602	0.149254	0.152174
10	61892107	61892144	377	37	61892127	244	363	0.962865	61892124	61892129	6	ATGCACACGGCATTCTCTGC	10_-_338359	NM_181423	-	'PA'	61892116	61892136	92	56	77	43	95	0.666667	0.643678	0.578947	0.641791	0.688406
10	7924591	7924624	91	33	7924606	36	89	0.978022	7924606	7924612	7	ACCTTATTTTTTCTGTTATT	10_-_338362	NM_177387	-	'3'UTR'	7924551	7927184	28	5	24	10	22	0.195804	0.131579	0.212389	0.217391	0.261905
10	7924649	7924684	131	35	7924666	82	125	0.954198	7924663	7924667	5	AGGTGAAGTGTTCCTTAATT	10_-_338362	NM_177387	-	'3'UTR'	7924551	7927184	49	13	30	11	22	0.342657	0.342105	0.265487	0.23913	0.261905
10	7927047	7927080	67	33	7927062	17	66	0.985075	7927060	7927073	14	ACATGTTGGGGTCATTGGGA	10_-_338362	NM_177387	-	'3'UTR'	7924551	7927184	22	8	19	5	12	0.153846	0.210526	0.168142	0.108696	0.142857
10	7924535	7924567	150	32	7924554	70	144	0.96	7924551	7924554	4	AAGATGTCTTCTTTTTTAAC	10_-_338362	NM_177387	-	'PA'	7924541	7924561	44	12	40	20	28	0.307692	0.315789	0.353982	0.434783	0.333333
10	82696068	82696103	198	35	82696089	71	189	0.954545	82696083	82696091	9	ACATAGATACAAGCTCACAT	10_-_338365	NM_177388	-	'3'UTR'	82693884	82696309	44	33	38	18	56	0.091858	0.179348	0.0976864	0.0841121	0.108527
10	82693572	82693616	1658	44	82693594	1325	1593	0.960796	82693592	82693595	4	ATTTTCTTGTGCCATTGTGG	10_-_338365	NM_177388	-	'extend_3'TUR'	82688884	82693883	435	151	351	196	460	0.908142	0.820652	0.902314	0.915888	0.891473
10	12898376	12898470	1765	94	12898446	389	1710	0.968839	12898405	12898453	49	AAATGTTTGGATAAACTAAA	10_-_353258	NM_181470	-	'PA'	12898434	12898454	290	329	458	221	412	0.935484	0.976261	0.954167	0.973568	0.951501
10	17618822	17618869	977	47	17618851	651	962	0.984647	17618844	17618855	12	AAATATTAAACTTTGCATTT	10_-_380629	NM_001033432	-	'extend_3'TUR'	17615272	17620271	347	116	163	82	254	0.776286	0.74359	0.761682	0.700855	0.846667
10	17620248	17620290	244	42	17620272	163	233	0.954918	17620264	17620273	10	AGTTCTTTAACCTGGTGACG	10_-_380629	NM_001033432	-	'PA'	17620262	17620282	98	33	38	26	38	0.219239	0.211538	0.17757	0.222222	0.126667
10	120360895	120360940	58	45	120360910	42	56	0.965517	120360905	120360931	27	AATCTATGTCTCAGATGCTA	10_-_380664	NM_001081193	-	'3'UTR'	120360467	120362448	9	9	15	6	17	0.109756	0.155172	0.263158	0.157895	0.232877
10	120360437	120360527	261	90	120360474	181	252	0.965517	120360449	120360474	26	AAAAACATGCGTCTTTGTTT	10_-_380664	NM_001081193	-	'PA'	120360457	120360477	73	49	42	32	56	0.890244	0.844828	0.736842	0.842105	0.767123
10	112362466	112362516	2263	50	112362489	1552	2187	0.966416	112362485	112362494	10	AAATATTTTGACTCATCTTC	10_-_382423	NM_001033474	-	'PA'	112362474	112362494	670	277	477	215	548	1	1	1	1	1
10	122422115	122422144	83	29	122422131	45	79	0.951807	122422128	122422132	5	AGTGCTGTGTTTTTGTTTTT	10_-_387251	NR_029527	-	'extend_3'TUR'	122417696	122422695	18	5	19	9	28	1	1	1	1	1
10	7399722	7399749	41	27	7399737	25	40	0.97561	7399733	7399739	7	AGAGAGCTGGAGCTGCTTCT	10_-_407824	NR_033219	-	'exon'	7398769	7400956	8	5	8	10	9	1	1	1	1	1
10	79316488	79316519	23	31	79316503	14	22	0.956522	79316497	79316510	14	ATCCGGATTCTTGTCTGCCT	10_-_414101	NR_029447	-	'exon'	79314122	79317716	19	0	1	0	2	0.527778	0	0.0555556	0	0.0909091
10	79312296	79312341	22	45	79312329	13	22	1	79312303	79312335	33	AAATCTTTTTGTCATTGTTG	10_-_414101	NR_029447	-	'extend_3'TUR'	79309122	79314121	8	4	4	2	4	0.222222	0.5	0.222222	0.222222	0.181818
10	79314111	79314139	50	28	79314126	36	49	0.98	79314125	79314128	4	ACCCTCCTGCTTGTGTGTGA	10_-_414101	NR_029447	-	'PA'	79314112	79314132	9	4	13	7	16	0.25	0.5	0.722222	0.777778	0.727273
10	24889917	24889946	79	29	24889933	55	77	0.974684	24889931	24889936	6	AAACAGAGTGTTCTTACAGT	10_-_432442	NM_018747	-	'3'UTR'	24888896	24890857	16	12	14	19	16	0.410256	0.444444	0.451613	0.678571	0.285714
10	24888881	24888911	109	30	24888896	40	104	0.954128	24888896	24888899	4	GCTTTTCTTCTTTTCTTTCC	10_-_432442	NM_018747	-	'PA'	24888886	24888906	23	15	17	9	40	0.589744	0.555556	0.548387	0.321429	0.714286
10	32449968	32449993	26	25	32449981	10	26	1	32449979	32449983	5	AGAAAAAAAAAATGAGTAAG	10_-_432450	NM_001025286	-	'intron'	32122180	32609448	2	6	6	10	2	1	1	1	1	1
10	62478156	62478195	697	39	62478179	393	685	0.982783	62478172	62478179	8	AAACCACTGATGTTGCTACT	10_-_432467	NM_001079824	-	'3'UTR'	62477412	62478385	151	97	145	74	218	0.915152	0.95098	0.884146	0.925	0.95614
10	62480531	62480583	56	52	62480554	16	54	0.964286	62480547	62480576	30	AAAGATGAGACTTGGTTTTC	10_-_432467	NM_001079824	-	'intron'	62480359	62480788	14	5	19	6	10	0.0848485	0.0490196	0.115854	0.075	0.0438596
10	116785891	116785928	337	37	116785908	180	326	0.967359	116785907	116785915	9	TATTGCCCTTGATTTTGATA	10_-_432508	NM_001013391	-	'3'UTR'	116781724	116792993	103	55	63	30	75	0.132391	0.0989209	0.0950226	0.0840336	0.121163
10	116786070	116786113	1372	43	116786089	429	1308	0.953353	116786089	116786098	10	AAAGCTGTTCACGTTATTTG	10_-_432508	NM_001013391	-	'3'UTR'	116781724	116792993	354	222	323	151	258	0.455013	0.399281	0.487179	0.422969	0.416801
10	116786345	116786384	792	39	116786365	637	754	0.95202	116786363	116786367	5	AACCAGTAGCTCTACTTTTA	10_-_432508	NM_001013391	-	'3'UTR'	116781724	116792993	207	142	156	97	152	0.266067	0.255396	0.235294	0.271709	0.245557
10	116781707	116781742	237	35	116781727	149	230	0.970464	116781722	116781728	7	AATACTTTGCAGTTTGTTCT	10_-_432508	NM_001013391	-	'PA'	116781714	116781734	41	52	30	33	74	0.0526992	0.0935252	0.0452489	0.092437	0.119548
10	81084518	81084555	105	37	81084533	42	101	0.961905	81084531	81084542	12	ACATTTTGTTACATTTATGT	10_-_50721	NM_001163430	-	'PA'	81084521	81084541	29	13	19	13	27	1	1	1	1	1
10	80506796	80506840	2770	44	80506820	874	2644	0.954513	80506816	80506824	9	TGCCTCTCTGCTTCCTGTGT	10_-_52551	NM_024499	-	'PA'	80506808	80506828	763	240	740	234	667	1	1	1	1	1
10	70793435	70793503	1706	68	70793471	1018	1623	0.951348	70793466	70793477	12	ATGTACATGTACATTGTACT	10_-_52637	NM_134007	-	'3'UTR'	70793242	70793784	523	296	325	130	349	0.865894	0.883582	0.873656	0.844156	0.827014
10	70793221	70793255	275	34	70793240	197	264	0.96	70793237	70793240	4	CCTCTGTGTTCATCTCTGTG	10_-_52637	NM_134007	-	'PA'	70793232	70793252	81	39	47	24	73	0.134106	0.116418	0.126344	0.155844	0.172986
10	126619561	126619603	2811	42	126619582	1278	2701	0.960868	126619580	126619587	8	ACTGAGGTTGTTGTCTTGGG	10_-_52666	NM_001166413	-	'PA'	126619567	126619587	700	264	569	235	933	1	1	1	1	1
10	59451124	59451184	994	60	59451154	330	947	0.952716	59451138	59451164	27	AAGTATTGGGGATCAGATGG	10_-_52717	NM_025514	-	'3'UTR'	59450657	59451470	217	129	223	99	279	0.489842	0.635468	0.515012	0.495	0.560241
10	59451315	59451354	121	39	59451341	44	115	0.950413	59451327	59451342	16	AGATGTCGCGGAGATGTTTT	10_-_52717	NM_025514	-	'3'UTR'	59450657	59451470	34	15	28	9	29	0.0767494	0.0738916	0.0646651	0.045	0.0582329
10	59450145	59450186	201	41	59450169	67	192	0.955224	59450159	59450173	15	AATTGGCCTTAATCTCAGGA	10_-_52717	NM_025514	-	'extend_3'TUR'	59445657	59450656	50	18	68	15	41	0.112867	0.08867	0.157044	0.075	0.0823293
10	59450638	59450676	542	38	59450657	290	523	0.964945	59450655	59450663	9	AGATCGCTGTGCGTATCCTT	10_-_52717	NM_025514	-	'PA'	59450647	59450667	142	41	114	77	149	0.320542	0.20197	0.263279	0.385	0.299197
10	55735944	55735988	21	44	55735979	11	21	1	55735952	55735979	28	AAATGTCCCAGCACCTGTGT	10_-_544696	NM_001033385	-	'3'UTR'	55734100	55737390	5	1	5	4	6	0.277778	0.125	0.172414	0.307692	0.122449
10	55734084	55734115	99	31	55734102	70	96	0.969697	55734097	55734102	6	AAACTATCTTGTGAGAACAT	10_-_544696	NM_001033385	-	'PA'	55734090	55734110	13	7	24	9	43	0.722222	0.875	0.827586	0.692308	0.877551
10	82082755	82082787	145	32	82082771	60	140	0.965517	82082770	82082775	6	AATTTAGGGGGCTCAATGGC	10_-_544717	NM_001135569	-	'3'UTR'	82082596	82082866	17	15	31	24	53	0.607143	0.625	0.563636	0.631579	0.588889
10	82082583	82082615	96	32	82082603	44	95	0.989583	82082597	82082603	7	AAAGATAGTCTTACTATACA	10_-_544717	NM_001135569	-	'PA'	82082586	82082606	11	9	24	14	37	0.392857	0.375	0.436364	0.368421	0.411111
10	94254955	94254982	46	27	94254968	22	44	0.956522	94254968	94254971	4	AAATTGTTGTTCACATTGGA	10_-_54712	NM_018797	-	'3'UTR'	94253612	94255930	16	13	6	2	7	0.326531	0.342105	0.352941	0.2	0.368421
10	94351925	94351953	43	28	94351942	25	42	0.976744	94351937	94351942	6	TTTGGAAAAAAAATATTTAT	10_-_54712	NM_018797	-	'intron'	94345267	94369098	19	5	6	5	7	0.387755	0.131579	0.352941	0.5	0.368421
10	94253599	94253628	49	29	94253614	24	47	0.959184	94253610	94253617	8	AAATGTGGACTGTTTGTCTT	10_-_54712	NM_018797	-	'PA'	94253602	94253622	14	20	5	3	5	0.285714	0.526316	0.294118	0.3	0.263158
10	18260547	18260585	719	38	18260566	502	695	0.96662	18260565	18260572	8	AACTTTCCTTGCCTCCGCTG	10_-_56016	NM_019487	-	'3'UTR'	18259929	18260939	179	55	142	82	237	0.852381	0.808824	0.876543	0.845361	0.861818
10	18259911	18259943	86	32	18259929	23	82	0.953488	18259925	18259932	8	GGTTCTCAGTCTCCCTAATG	10_-_56016	NM_019487	-	'PA'	18259919	18259939	21	10	17	10	24	0.1	0.147059	0.104938	0.103093	0.0872727
10	62044843	62044895	1021	52	62044862	634	988	0.967679	62044860	62044864	5	ATCTTGGTGTGTCGATCTTG	10_-_56200	NM_019553	-	'3'UTR'	62042995	62045097	195	215	330	107	141	0.372849	0.305398	0.372881	0.301408	0.248677
10	62042977	62043055	2078	78	62043002	789	1988	0.956689	62042994	62043002	9	ATATTTAGTTCTTGGTGGCT	10_-_56200	NM_019553	-	'PA'	62042985	62043005	323	479	540	238	408	0.617591	0.680398	0.610169	0.670423	0.719577
10	93323645	93323702	5976	57	93323672	3215	5680	0.950469	93323664	93323673	10	AGAGATACATTTTAATGTGT	10_-_56307	NM_019648	-	'3'UTR'	93321235	93324094	1512	956	1312	601	1299	0.570781	0.780408	0.778635	0.72497	0.780649
10	93324060	93324096	588	36	93324079	424	559	0.95068	93324077	93324080	4	AACTCAACGTCTTTATTTTC	10_-_56307	NM_019648	-	'3'UTR'	93321235	93324094	174	73	149	57	106	0.0656852	0.0595918	0.0884273	0.0687575	0.0637019
10	93342818	93342868	1569	50	93342843	994	1527	0.973231	93342843	93342852	10	AAAAAGAAGAAGAAGAAGAG	10_-_56307	NM_019648	-	'exon'	93342818	93342883	877	147	166	145	192	0.331068	0.12	0.0985163	0.17491	0.115385
10	80829830	80829861	23	31	80829843	13	23	1	80829842	80829854	13	ACCCTTTGTCTGTGTGTGCG	10_-_56371	NM_019757	-	'3'UTR'	80829624	80830253	9	1	6	3	4	0.113924	0.027027	0.0645161	0.0882353	0.0625
10	80830100	80830128	60	28	80830115	41	57	0.95	80830114	80830116	3	AGCTGTGGAGCCAGTGTCTG	10_-_56371	NM_019757	-	'3'UTR'	80829624	80830253	21	4	13	7	12	0.265823	0.108108	0.139785	0.205882	0.1875
10	80829603	80829639	238	36	80829625	118	227	0.953782	80829618	80829625	8	ACCTTGGGGTCGGTCTCCTG	10_-_56371	NM_019757	-	'PA'	80829614	80829634	49	32	74	24	48	0.620253	0.864865	0.795699	0.705882	0.75
10	57235548	57235608	11479	60	57235584	7662	11050	0.962627	57235583	57235588	6	AAAACGTGTGGTGGTAGCAT	10_-_56442	NM_019760	-	'PA'	57235572	57235592	4832	1367	2293	1212	3020	0.964279	0.965395	0.964661	0.972713	0.972312
10	120983495	120983548	957	53	120983515	661	929	0.970742	120983512	120983520	9	AAAAGGCTTGTGTGCTTTTG	10_-_56480	NM_019786	-	'PA'	120983503	120983523	177	154	245	124	229	1	1	1	1	1
10	41901631	41901669	947	38	41901652	720	936	0.988384	41901647	41901653	7	ATCTCATGCCCAGGAGTCTG	10_-_56484	NM_019740	-	'extend_3'TUR'	41900592	41905591	361	69	157	89	260	1	1	1	1	1
10	127568201	127568241	324	40	127568225	202	317	0.978395	127568214	127568226	13	AGTTCTAAAGCAATTTGAAT	10_-_56516	NM_019711	-	'3'UTR'	127566526	127570700	120	24	86	32	55	0.164835	0.113208	0.148276	0.111111	0.0763889
10	127570143	127570181	280	38	127570163	212	273	0.975	127570160	127570166	7	AATCGCAGTGCTGTGAAGTC	10_-_56516	NM_019711	-	'3'UTR'	127566526	127570700	72	27	61	38	75	0.0989011	0.127358	0.105172	0.131944	0.104167
10	127570250	127570305	860	55	127570288	627	822	0.955814	127570283	127570288	6	AAAAGAAGTTTCTTGCTTTG	10_-_56516	NM_019711	-	'3'UTR'	127566526	127570700	192	58	203	89	280	0.263736	0.273585	0.35	0.309028	0.388889
10	127566505	127566547	1119	42	127566526	536	1077	0.962466	127566524	127566529	6	TGTCTAGTGTCATCCATGGT	10_-_56516	NM_019711	-	'PA'	127566516	127566536	330	100	223	124	300	0.453297	0.471698	0.384483	0.430556	0.416667
10	13243904	13243959	251	55	13243945	120	247	0.984064	13243924	13243945	22	AAAATATAGCTTTGTTTAGT	10_-_56535	NM_019961	-	'3'UTR'	13243751	13244690	63	37	35	40	72	0.684783	0.711538	0.514706	0.833333	0.672897
10	13244559	13244623	126	64	13244582	45	120	0.952381	13244576	13244614	39	AAAGTCTTCATTTCATAATG	10_-_56535	NM_019961	-	'3'UTR'	13243751	13244690	29	15	33	8	35	0.315217	0.288462	0.485294	0.166667	0.327103
10	115854906	115854936	48	30	115854924	20	46	0.958333	115854917	115854925	9	CTCTCTATTTCCTTTTTATG	10_-_58802	NM_021452	-	'PA'	115854914	115854934	17	2	13	3	11	1	1	1	1	1
10	80616003	80616051	261	48	80616036	121	250	0.957854	80616026	80616037	12	AAGAGTAGTCAGTCCGGCAT	10_-_59004	NM_021501	-	'extend_3'TUR'	80611716	80616715	71	30	53	24	72	1	1	1	1	1
10	76224585	76224616	94	31	76224602	45	90	0.957447	76224599	76224605	7	ATGGCTCTGACTTCTCTCTG	10_-_59093	NM_021568	-	'PA'	76224589	76224609	18	17	22	11	22	1	1	1	1	1
10	116652256	116652292	422	36	116652273	173	413	0.978673	116652271	116652278	8	TGTCTGCCTCTTGTGACTTC	10_-_64050	NM_026570	-	'3'UTR'	116652197	116652722	113	68	117	31	84	0.743421	0.701031	0.740506	0.525424	0.575342
10	116652180	116652217	209	37	116652198	125	199	0.952153	116652195	116652206	12	ACACAGTGTGCTTTGATCAT	10_-_64050	NM_026570	-	'PA'	116652187	116652207	39	29	41	28	62	0.256579	0.298969	0.259494	0.474576	0.424658
10	66729419	66729457	1293	38	66729440	812	1240	0.95901	66729437	66729440	4	ATACCTTTGTTGAGTATGAC	10_-_641340	NM_001036293	-	'PA'	66729427	66729447	339	138	290	146	327	1	0.985714	0.9699	0.979866	0.979042
10	75725466	75725503	93	37	75725482	42	90	0.967742	75725478	75725492	15	ACATACATTCTTTACATGTC	10_-_64451	NM_001081419	-	'extend_3'TUR'	75720794	75725793	19	25	15	15	16	0.0875576	0.168919	0.0961538	0.189873	0.0727273
10	75725772	75725813	740	41	75725796	613	708	0.956757	75725789	75725797	9	AATTCTGCATTTTGAAATGT	10_-_64451	NM_001081419	-	'PA'	75725784	75725804	191	121	134	64	198	0.880184	0.817568	0.858974	0.810127	0.9
10	80727441	80727491	3423	50	80727467	1104	3283	0.9591	80727459	80727472	14	AGCCACGCACATGTGTGTCA	10_-_66047	NM_025317	-	'PA'	80727457	80727477	946	278	824	351	884	1	1	1	1	1
10	80315549	80315596	1791	47	80315579	593	1713	0.956449	80315566	80315579	14	ATCTCCCTCCCTTCCTGCTC	10_-_66094	NM_025349	-	'PA'	80315560	80315580	433	244	450	164	422	0.964365	0.972112	0.995575	1	0.98829
10	13521143	13521185	23	42	13521175	12	22	0.956522	13521153	13521175	23	AGTGAGTGCTTGTGTTGAGT	10_-_66253	NM_025446	-	'intron'	13410446	13521653	1	6	3	4	8	0.0285714	0.352941	0.107143	0.133333	0.186047
10	13372498	13372536	137	38	13372523	46	131	0.956204	13372509	13372523	15	AGTCACGGAAGCAGACTGGT	10_-_66253	NM_025446	-	'PA'	13372505	13372525	34	11	25	26	35	0.971429	0.647059	0.892857	0.866667	0.813953
10	29916879	29916926	930	47	29916905	408	891	0.958065	29916898	29916912	15	ATTCATTAATGGCTTCTGAG	10_-_66311	NM_001109747	-	'3'UTR'	29915815	29917005	166	140	219	143	223	1	1	1	1	1
10	38838597	38838637	102	40	38838612	50	99	0.970588	38838611	38838625	15	AATGGTTGACTCTTCCATTT	10_-_66337	NM_183254	-	'PA'	38838604	38838624	28	5	20	8	38	1	1	1	1	1
10	79781429	79781472	564	43	79781455	338	549	0.973404	79781450	79781457	8	AACACAGTTCTCCCTTAAGC	10_-_66374	NM_025521	-	'3'UTR'	79781000	79782092	175	53	135	50	136	0.945946	0.946429	0.992647	0.961538	0.971429
10	126459373	126459426	348	53	126459400	135	342	0.982759	126459388	126459414	27	ATTTGTATAGTGCTTAATGT	10_-_66399	NM_025537	-	'3'UTR'	126459388	126459575	67	53	76	57	89	0.905405	0.828125	0.974359	0.982759	0.927083
10	126459490	126459519	28	29	126459504	13	28	1	126459501	126459511	11	TTCAACCCTCAAATTTGTTT	10_-_66399	NM_025537	-	'3'UTR'	126459388	126459575	7	11	2	1	7	0.0945946	0.171875	0.025641	0.0172414	0.0729167
10	79498664	79498717	1966	53	79498695	758	1897	0.964903	79498692	79498700	9	ACTGTGGTGCAATCCTAGAG	10_-_66420	NM_025554	-	'PA'	79498688	79498708	457	316	469	204	451	1	1	1	1	1
10	33716328	33716388	6025	60	33716367	3789	5883	0.976432	33716361	33716367	7	AAATATAAAGTGTTTACTTC	10_-_66521	NM_025614	-	'PA'	33716351	33716371	956	1214	1531	729	1453	0.973523	0.992641	0.994802	0.991837	0.992486
10	79802529	79802581	187	52	79802567	92	178	0.951872	79802553	79802569	17	GCTCTGGCTGCACTGCAGAG	10_-_66548	NM_001285435	-	'3'UTR'	79802538	79803899	60	9	42	21	46	0.48	0.257143	0.368421	0.42	0.285714
10	79802664	79802691	32	27	79802678	18	31	0.96875	79802675	79802683	9	AGCTGCTGCCCCAGGCCTGT	10_-_66548	NM_001285435	-	'3'UTR'	79802538	79803899	8	1	8	4	10	0.064	0.0285714	0.0701754	0.08	0.0621118
10	79803666	79803705	152	39	79803683	84	145	0.953947	79803677	79803692	16	AAGGAGCTTCAAGATCCTGG	10_-_66548	NM_001285435	-	'3'UTR'	79802538	79803899	35	8	26	13	63	0.28	0.228571	0.22807	0.26	0.391304
10	79805467	79805497	108	30	79805483	60	106	0.981481	79805481	79805484	4	TTCCTGCCTCCCCTCAGTAT	10_-_66548	NR_104340	-	'exon'	79805052	79805765	18	15	31	10	32	0.144	0.428571	0.27193	0.2	0.198758
10	79865722	79865764	4576	42	79865743	2802	4396	0.960664	79865741	79865747	7	ACGCCTGGCTCCTTCCTCAT	10_-_66594	NM_025650	-	'PA'	79865732	79865752	1382	446	1019	433	1116	1	1	1	1	1
10	114635481	114635534	1347	53	114635515	930	1285	0.953972	114635513	114635516	4	ATTTTAGTGTTTTCAGTTAC	10_-_66687	NM_025706	-	'3'UTR'	114634927	114636607	375	132	274	135	369	0.75	0.725275	0.742547	0.692308	0.78178
10	114635849	114635932	170	83	114635918	88	168	0.988235	114635861	114635920	60	ATAAGCTGATTCAACAAAAT	10_-_66687	NM_025706	-	'3'UTR'	114634927	114636607	51	16	40	23	38	0.102	0.0879121	0.108401	0.117949	0.0805085
10	114636435	114636483	250	48	114636452	167	240	0.96	114636449	114636457	9	AATTATTTTTGTAGTTACTT	10_-_66687	NM_025706	-	'3'UTR'	114634927	114636607	71	31	50	31	57	0.142	0.17033	0.135501	0.158974	0.120763
10	127647119	127647158	180	39	127647143	143	171	0.95	127647143	127647146	4	AAAACCTGGTGAAACAGTTG	10_-_66701	NM_025716	-	'3'UTR'	127646966	127647908	52	35	33	16	35	0.281081	0.388889	0.297297	0.280702	0.230263
10	127646949	127647003	446	54	127646968	319	424	0.950673	127646963	127646989	27	AAAATACTCTGTCTATAAAA	10_-_66701	NM_025716	-	'PA'	127646956	127646976	133	55	78	41	117	0.718919	0.611111	0.702703	0.719298	0.769737
10	114809125	114809150	32	25	114809139	16	31	0.96875	114809136	114809140	5	CAAGGTTTGTTTCTTTGTTT	10_-_66816	NM_025780	-	'3'UTR'	114807022	114809615	8	5	6	3	9	0.0503145	0.0649351	0.047619	0.0714286	0.0596026
10	114809200	114809232	149	32	114809217	117	143	0.959732	114809213	114809218	6	ACTAATGTATTTTGTATGAA	10_-_66816	NM_025780	-	'3'UTR'	114807022	114809615	53	24	29	5	32	0.333333	0.311688	0.230159	0.119048	0.211921
10	114805439	114805473	241	34	114805456	152	233	0.966805	114805456	114805460	5	AATTTTTGTCATCCCTGTTA	10_-_66816	NM_025780	-	'extend_3'TUR'	114802022	114807021	62	38	49	17	67	0.389937	0.493506	0.388889	0.404762	0.443709
10	114820429	114820462	84	33	114820450	34	80	0.952381	114820442	114820450	9	AAAATCCCTCTGATGTTTGT	10_-_66816	NM_025780	-	'intron'	114813604	114821260	20	3	26	6	25	0.125786	0.038961	0.206349	0.142857	0.165563
10	114820962	114820994	70	32	114820980	30	68	0.971429	114820974	114820982	9	ACCTTTATTTTCTACTCTTT	10_-_66816	NM_025780	-	'intron'	114813604	114821260	16	7	16	11	18	0.100629	0.0909091	0.126984	0.261905	0.119205
10	128255457	128255498	338	41	128255475	275	326	0.964497	128255473	128255476	4	AAAATTTTGTCTCTACTCCT	10_-_66844	NM_024180	-	'3'UTR'	128254513	128255935	57	48	102	38	81	0.292308	0.360902	0.362989	0.339286	0.391304
10	128255532	128255580	632	48	128255551	323	602	0.952532	128255550	128255565	16	AAGGACAGAGAGATTTTCTC	10_-_66844	NM_024180	-	'3'UTR'	128254513	128255935	138	85	179	74	126	0.707692	0.639098	0.637011	0.660714	0.608696
10	30328144	30328200	539	56	30328183	172	518	0.961039	30328160	30328186	27	GACAAGTTCCTTACCTGATT	10_-_66847	NM_025798	-	'3'UTR'	30328013	30328196	128	63	134	40	153	1	1	1	1	1
10	80004389	80004423	184	34	80004406	151	180	0.978261	80004403	80004412	10	AGATTTCATAGTGTGTGGTG	10_-_66932	NM_025852	-	'3'UTR'	80003671	80005137	44	34	34	17	51	0.517647	0.708333	0.772727	0.708333	0.689189
10	80005005	80005030	26	25	80005019	13	26	1	80005016	80005019	4	GACCACGCGTCTCCCAAGCT	10_-_66932	NM_025852	-	'3'UTR'	80003671	80005137	10	7	3	1	5	0.117647	0.145833	0.0681818	0.0416667	0.0675676
10	80012784	80012813	44	29	80012798	41	42	0.954545	80012798	80012804	7	AAAAAGAAAGAGAAAGACCC	10_-_66932	NM_025852	-	'exon'	80012078	80013810	24	4	3	4	7	0.282353	0.0833333	0.0681818	0.166667	0.0945946
10	80003652	80003682	28	30	80003671	16	27	0.964286	80003658	80003671	14	ATTCACAAAGCCCAGGTCTG	10_-_66932	NM_025852	-	'PA'	80003661	80003681	7	3	4	2	11	0.0823529	0.0625	0.0909091	0.0833333	0.148649
10	89174689	89174734	189	45	89174718	129	183	0.968254	89174712	89174724	13	AAATATATCTGTTTAATGTT	10_-_67019	NM_025914	-	'PA'	89174708	89174728	45	35	38	19	46	1	1	1	1	1
10	122432104	122432144	403	40	122432128	210	386	0.957816	122432120	122432130	11	ACGTTTCTACTTCTGATTTG	10_-_67074	NM_001163025	-	'3'UTR'	122429117	122432725	98	41	95	50	102	0.248101	0.29078	0.313531	0.331126	0.275676
10	122432153	122432193	113	40	122432173	63	108	0.955752	122432168	122432185	18	AAATGCTCGAAGCTGTATTT	10_-_67074	NM_001163025	-	'3'UTR'	122429117	122432725	26	5	22	17	38	0.0658228	0.035461	0.0726073	0.112583	0.102703
10	122432197	122432234	682	37	122432217	510	651	0.954545	122432214	122432219	6	AAAACAGTTGCATTTATTTA	10_-_67074	NM_001163025	-	'3'UTR'	122429117	122432725	204	69	139	70	169	0.516456	0.489362	0.458746	0.463576	0.456757
10	122432361	122432395	90	34	122432378	43	86	0.955556	122432375	122432383	9	AGATTTTTGAGGCTGGTGTT	10_-_67074	NM_001163025	-	'3'UTR'	122429117	122432725	34	10	17	6	19	0.0860759	0.070922	0.0561056	0.0397351	0.0513514
10	126504320	126504379	5197	59	126504346	2959	4983	0.958822	126504343	126504347	5	ATACTCTTTGTCTTGTCTTG	10_-_67125	NM_025982	-	'PA'	126504336	126504356	1483	545	1041	573	1341	0.989326	0.994526	0.98673	0.993068	0.986755
10	114778787	114778824	227	37	114778805	101	217	0.955947	114778805	114778813	9	ATTCCTTACTGCCGTGTGGA	10_-_67226	NM_133683	-	'3'UTR'	114777796	114779561	83	14	48	19	53	0.134304	0.130841	0.175182	0.157025	0.130542
10	114779437	114779477	392	40	114779462	213	373	0.951531	114779455	114779462	8	AATACCAGCTCCTCCCGTGT	10_-_67226	NM_133683	-	'3'UTR'	114777796	114779561	120	22	90	28	113	0.194175	0.205607	0.328467	0.231405	0.278325
10	114777777	114777816	925	39	114777798	688	890	0.962162	114777794	114777803	10	AAAGACTTGTTTTGTTTTTA	10_-_67226	NM_133683	-	'PA'	114777786	114777806	398	67	127	70	228	0.644013	0.626168	0.463504	0.578512	0.561576
10	39943265	39943327	590	62	39943303	221	574	0.972881	39943280	39943313	34	AAACTTGTGTTTGGATCATA	10_-_67239	NM_023323	-	'3'UTR'	39943052	39943546	76	146	181	71	100	0.444444	0.637555	0.619863	0.606838	0.510204
10	39943432	39943509	444	77	39943494	199	431	0.970721	39943449	39943495	47	ACTTGAGGCTGTTCGGTTTC	10_-_67239	NM_023323	-	'3'UTR'	39943052	39943546	95	83	111	46	96	0.555556	0.362445	0.380137	0.393162	0.489796
10	94943420	94943477	2103	57	94943440	1674	2034	0.96719	94943437	94943441	5	ATCCAAGTGTGTATTTCATT	10_-_67270	NM_026065	-	'PA'	94943430	94943450	384	296	520	251	583	0.987147	0.986667	0.982987	0.996032	0.988136
10	39969293	39969361	1432	68	39969334	1055	1374	0.959497	39969314	39969335	22	AAAGAAGTGGTCTTGTATGC	10_-_67371	NM_026113	-	'3'UTR'	39969009	39969338	427	155	262	142	388	0.676704	0.731132	0.677003	0.771739	0.754864
10	39967488	39967525	436	37	39967510	181	420	0.963303	39967503	39967511	9	AGATAATAGTTGATGGTTGC	10_-_67371	NM_026113	-	'extend_3'TUR'	39964009	39969008	138	48	100	30	104	0.2187	0.226415	0.258398	0.163043	0.202335
10	62207190	62207242	1853	52	62207221	488	1828	0.986508	62207211	62207227	17	ACAAGTAATTACTAATGTCT	10_-_67500	NM_026201	-	'3'UTR'	62206676	62207510	519	220	448	208	433	0.452091	0.555556	0.567089	0.508557	0.584345
10	62207270	62207316	274	46	62207286	109	266	0.970803	62207286	62207303	18	AAAACCTTTTAGGATGAACT	10_-_67500	NM_026201	-	'3'UTR'	62206676	62207510	56	37	70	41	62	0.0487805	0.0934343	0.0886076	0.100244	0.0836707
10	62215904	62215961	947	57	62215922	380	915	0.966209	62215922	62215930	9	GTCTGTAATTTCCAAGATAG	10_-_67500	NM_026201	-	'exon'	62215922	62216161	423	85	154	111	142	0.368467	0.214646	0.194937	0.271394	0.191633
10	62206657	62206695	277	38	62206678	198	269	0.971119	62206675	62206682	8	AATCTGTGTAGTTCCTTCAG	10_-_67500	NM_026201	-	'PA'	62206666	62206686	56	28	77	32	76	0.0487805	0.0707071	0.0974684	0.0782396	0.102564
10	94136439	94136469	38	30	94136458	16	38	1	94136448	94136459	12	ATGTGACCACATATCTCCAT	10_-_67723	NR_015524	-	'exon'	94136238	94139874	17	2	4	6	9	1	1	1	1	1
10	10265015	10265054	1861	39	10265035	1486	1807	0.970983	10265034	10265036	3	AAGCCTGTGTGTTGAATGAA	10_-_67844	NM_026405	-	'3'UTR'	10264837	10266099	585	106	415	190	511	0.890411	0.861789	0.828343	0.844444	0.81891
10	10264783	10264851	338	68	10264806	168	323	0.955621	10264798	10264823	26	AATTTTAGATTTGTCACTTT	10_-_67844	NM_026405	-	'extend_3'TUR'	10259837	10264836	72	17	86	35	113	0.109589	0.138211	0.171657	0.155556	0.18109
10	43244914	43244984	953	70	43244963	602	907	0.951731	43244937	43244964	28	AAAATAAAGTTCTCCTGTCA	10_-_67851	NM_026411	-	'3'UTR'	43244927	43245034	209	160	196	99	243	0.653125	0.816327	0.687719	0.733333	0.698276
10	43245001	43245036	388	35	43245019	190	377	0.971649	43245017	43245021	5	AGACTGCCTCCTAATTGTCA	10_-_67851	NM_026411	-	'3'UTR'	43244927	43245034	111	36	89	36	105	0.346875	0.183673	0.312281	0.266667	0.301724
10	127985147	127985211	37259	64	127985180	7351	36243	0.972731	127985169	127985185	17	AAGAATCAAACTGCTGTTAC	10_-_67945	NM_018860	-	'3'UTR'	127985166	127985442	31658	15941	33203	13476	31714	1	1	1	1	1
10	29065760	29065794	103	34	29065781	44	100	0.970874	29065772	29065782	11	AAAAAGATCCATAGGTCGTG	10_-_68031	NM_001284279	-	'3'UTR'	29063982	29066614	25	11	28	11	25	0.0507099	0.0415094	0.0676329	0.0555556	0.0584112
10	29065961	29066016	1325	55	29065980	707	1302	0.982642	29065979	29066002	24	AAATAATTTGTTTGAGTCTG	10_-_68031	NM_001284279	-	'3'UTR'	29063982	29066614	329	206	301	155	311	0.667343	0.777358	0.727053	0.782828	0.726636
10	29066212	29066264	227	52	29066240	140	217	0.955947	29066225	29066241	17	AGATATTTGATATCATTATG	10_-_68031	NM_001284279	-	'3'UTR'	29063982	29066614	70	31	47	12	57	0.141988	0.116981	0.113527	0.0606061	0.133178
10	100034951	100034985	296	34	100034969	237	284	0.959459	100034967	100034970	4	ACTTTCTGTTTGTCTGATTT	10_-_68281	NM_175128	-	'3'UTR'	100034908	100036199	91	35	39	36	83	0.90099	0.795455	0.672414	0.8	0.798077
10	100034891	100034923	69	32	100034908	42	68	0.985507	100034904	100034915	12	AAATAATAAGTGTGAAATAA	10_-_68281	NM_175128	-	'PA'	100034898	100034918	10	9	19	9	21	0.0990099	0.204545	0.327586	0.2	0.201923
10	7625518	7625562	1791	44	7625544	966	1766	0.986041	7625536	7625545	10	ATATCTTGAGTTGATGGTTT	10_-_68652	NM_138667	-	'3'UTR'	7625446	7627232	392	293	431	208	442	0.489388	0.485099	0.505275	0.453159	0.501134
10	7625428	7625477	1812	49	7625453	1125	1762	0.972406	7625446	7625454	9	AATGTGGATTTTGTGGCTTG	10_-_68652	NM_138667	-	'PA'	7625436	7625456	388	307	399	245	423	0.484395	0.508278	0.467761	0.533769	0.479592
10	74969546	74969583	262	37	74969568	162	258	0.984733	74969560	74969570	11	ACAGTGGTAGCACCCTTTGT	10_-_68778	NM_175133	-	'PA'	74969549	74969569	73	34	70	25	56	1	1	1	1	1
10	126324288	126324323	187	35	126324305	155	178	0.951872	126324303	126324308	6	ATACTTATTTTTTGGCTCTT	10_-_68876	NM_001159559	-	'PA'	126324294	126324314	54	19	34	19	52	1	1	1	1	1
10	118292640	118292680	1209	40	118292659	516	1175	0.971878	118292659	118292665	7	ACATCTCACCCCTTTTTCTA	10_-_69181	NM_001014390	-	'extend_3'TUR'	118291405	118296404	316	190	270	109	290	0.79597	0.896226	0.818182	0.844961	0.873494
10	118296381	118296432	230	51	118296412	45	225	0.978261	118296394	118296420	27	AAGTTTTTATACTTTCTGAA	10_-_69181	NM_001014390	-	'PA'	118296395	118296415	81	22	60	20	42	0.20403	0.103774	0.181818	0.155039	0.126506
10	93046114	93046158	3789	44	93046140	1965	3670	0.968593	93046134	93046140	7	AACTTGACTTGTGGACTATT	10_-_69878	NM_027246	-	'3'UTR'	93045774	93046208	647	664	930	466	963	0.992331	0.995502	0.982049	0.991489	0.995863
10	61570942	61570972	64	30	61570960	34	61	0.953125	61570956	61570961	6	AAGAAGCCGGTGAATGACTG	10_-_69894	NM_027251	-	'3'UTR'	61570404	61571601	16	2	16	3	24	1	1	1	1	1
10	127838432	127838467	293	35	127838452	232	290	0.989761	127838445	127838452	8	ATTCTGGAGTCTGTGTTTCT	10_-_69917	NM_027257	-	'PA'	127838441	127838461	75	38	66	38	73	1	1	1	1	1
10	8441995	8442035	2299	40	8442017	1754	2205	0.959113	8442014	8442018	5	AATCTGTTTCTCTGGTTGTT	10_-_70097	NM_175155	-	'PA'	8442007	8442027	524	280	487	275	639	0.908146	0.942761	0.96627	0.938567	0.948071
10	79221266	79221309	1237	43	79221287	649	1201	0.970897	79221285	79221295	11	AGAGCCCATGGCTTGGCGTC	10_-_70294	NM_144528	-	'3'UTR'	79221260	79221831	262	193	328	137	281	0.925795	0.979695	0.934473	0.964789	0.942953
10	79002973	79003009	402	36	79002990	146	392	0.975124	79002989	79002996	8	GGGGTGTCTCATGGATTCCA	10_-_70427	NM_027422	-	'PA'	79002980	79003000	108	65	83	40	96	1	1	1	1	1
10	88209332	88209370	1129	38	88209353	832	1088	0.963685	88209352	88209354	3	ACTCCTGCCTGAAAGACTAT	10_-_70683	NM_175158	-	'PA'	88209342	88209362	253	187	268	140	240	0.94403	0.973958	0.981685	0.958904	0.956175
10	60174803	60174841	518	38	60174821	308	496	0.957529	60174821	60174827	7	AGCTTGGTTGGTGTCTCCAT	10_-_71279	NM_023596	-	'PA'	60174810	60174830	162	49	95	48	142	1	1	1	1	1
10	67555250	67555298	1465	48	67555273	470	1430	0.976109	67555268	67555277	10	TCCTTTGGGAGTGTCTGTCT	10_-_71371	NM_023598	-	'extend_3'TUR'	67553341	67558340	231	166	370	234	429	0.939024	0.948571	0.87886	0.95122	0.91863
10	53256109	53256168	97	59	53256124	41	93	0.958763	53256122	53256157	36	AAACTCTGTCTTTCTGTGTG	10_-_71567	NM_027830	-	'extend_3'TUR'	53252130	53257129	15	9	38	9	22	1	1	1	1	1
10	78050757	78050847	107	90	78050792	13	103	0.962617	78050767	78050832	66	AAAGGAAAGGAAAGGAAAGG	10_-_71709	NM_027875	-	'intron'	78050203	78051451	61	7	11	9	15	0.100494	0.0325581	0.0261283	0.0478723	0.0366748
10	78047226	78047268	1774	42	78047249	1262	1737	0.979143	78047247	78047251	5	ATTCTGTGACTGAGTCCTTG	10_-_71709	NM_027875	-	'PA'	78047238	78047258	546	208	410	179	394	0.899506	0.967442	0.973872	0.952128	0.963325
10	87785533	87785564	131	31	87785551	75	127	0.969466	87785548	87785551	4	AGTAATTTGTCTCGGTTGCA	10_-_71712	NM_027878	-	'PA'	87785539	87785559	23	13	20	20	51	1	1	1	1	1
10	40552886	40552914	54	28	40552901	49	53	0.981481	40552900	40552901	2	AGTTTGATTTATAGGTAATC	10_-_71713	NM_027879	-	'3'UTR'	40551427	40552984	9	6	14	10	14	0.0368852	0.0487805	0.0703518	0.1	0.0625
10	40570824	40570858	49	34	40570840	26	49	1	40570832	40570847	16	AAAAGAGGAAAAAGTTCAAA	10_-_71713	NM_027879	-	'exon'	40570736	40570875	25	4	9	2	9	0.102459	0.0325203	0.0452261	0.02	0.0401786
10	40551408	40551447	804	39	40551430	557	788	0.9801	40551424	40551432	9	AAAGTGCTGCTGAGTTCATT	10_-_71713	NM_027879	-	'PA'	40551417	40551437	210	113	176	88	201	0.860656	0.918699	0.884422	0.88	0.897321
10	75099439	75099467	23	28	75099452	8	22	0.956522	75099451	75099459	9	TCCTGGTTCCCGTCTGTTTG	10_-_71733	NM_001162913	-	'3'UTR'	75099364	75100090	1	2	7	3	9	1	1	1	1	1
10	118639561	118639595	332	34	118639579	178	317	0.954819	118639578	118639582	5	AGATAGAGTATTCATTTAAG	10_-_71902	NM_027994	-	'3'UTR'	118635868	118640036	94	50	77	43	53	0.101512	0.106383	0.120879	0.134375	0.0635492
10	118639613	118639669	595	56	118639643	363	569	0.956303	118639640	118639650	11	AAGACCATGTTTCTTTCCTT	10_-_71902	NM_027994	-	'3'UTR'	118635868	118640036	168	81	118	41	161	0.181425	0.17234	0.185243	0.128125	0.193046
10	118639675	118639720	1869	45	118639702	1413	1808	0.967362	118639692	118639702	11	ATGACCATGGATTTCTTGGT	10_-_71902	NM_027994	-	'3'UTR'	118635868	118640036	530	271	335	183	489	0.572354	0.576596	0.525903	0.571875	0.586331
10	115922535	115922610	179	75	115922565	85	171	0.955307	115922553	115922602	50	ACGAATGTGTATATATTATA	10_-_72068	NM_001037847	-	'3'UTR'	115922217	115923255	44	30	43	27	27	0.143322	0.196078	0.130699	0.18	0.102273
10	115922817	115922857	220	40	115922833	76	211	0.959091	115922833	115922844	12	AAGATCCTTCTCGTATTTCA	10_-_72068	NM_001037847	-	'3'UTR'	115922217	115923255	60	29	46	28	48	0.19544	0.189542	0.139818	0.186667	0.181818
10	115922197	115922245	845	48	115922222	542	821	0.971598	115922217	115922225	9	ACTGCAGTGTTGGCTTTGAT	10_-_72068	NM_001037847	-	'PA'	115922207	115922227	203	94	240	95	189	0.661238	0.614379	0.729483	0.633333	0.715909
10	78527540	78527572	158	32	78527557	117	151	0.955696	78527552	78527559	8	AAGACTAGGGATTTTTTTGT	10_-_72128	NM_001004362	-	'3'UTR'	78527119	78529215	46	14	30	17	44	0.0869565	0.0965517	0.0931677	0.1	0.0938166
10	78527098	78527152	1525	54	78527119	939	1456	0.954754	78527118	78527126	9	TGTGTCAGGATATTTTATAA	10_-_72128	NM_001004362	-	'PA'	78527109	78527129	470	127	288	151	420	0.888469	0.875862	0.89441	0.888235	0.895522
10	62021277	62021319	191	42	62021293	63	182	0.95288	62021291	62021309	19	AATAATGTTGTAAAATGGCT	10_-_72320	NM_028197	-	'3'UTR'	62021218	62021755	46	20	44	18	54	0.211009	0.185185	0.222222	0.1875	0.216867
10	62025284	62025313	47	29	62025298	33	45	0.957447	62025298	62025304	7	AATTGTTGAATGAGCAGGGT	10_-_72320	NM_028197	-	'intron'	62022632	62025983	14	3	7	13	8	0.0642202	0.0277778	0.0353535	0.135417	0.0321285
10	62021201	62021239	661	38	62021220	481	642	0.971256	62021220	62021227	8	AATTACTTTTATTACCTCTT	10_-_72320	NM_028197	-	'PA'	62021208	62021228	158	85	147	65	187	0.724771	0.787037	0.742424	0.677083	0.751004
10	39756262	39756290	43	28	39756277	32	41	0.953488	39756274	39756278	5	ATAAAAGATATCCTGGCAAT	10_-_72472	NM_001114332	-	'3'UTR'	39753341	39756977	13	3	8	3	14	0.382353	0.230769	0.307692	0.5	0.608696
10	39795555	39795597	32	42	39795569	18	32	1	39795565	39795590	26	ACTCAAAGGTGTTCTCTCTC	10_-_72472	NM_028247	-	'3'UTR'	39795208	39796339	12	7	7	2	4	0.352941	0.538462	0.269231	0.333333	0.173913
10	39753327	39753357	29	30	39753340	16	29	1	39753337	39753350	14	AAGATCTTGTGATTGTGTTT	10_-_72472	NM_001114332	-	'PA'	39753331	39753351	9	3	11	1	5	0.264706	0.230769	0.423077	0.166667	0.217391
10	29172895	29172935	982	40	29172915	431	948	0.965377	29172912	29172922	11	AAAGCTTGGTTCACTTTGTT	10_-_72780	NM_028351	-	'PA'	29172903	29172923	142	33	118	121	534	0.893082	1	0.900763	0.968	0.927083
10	85354692	85354733	1662	41	85354715	1248	1623	0.976534	85354710	85354716	7	AAAATATGGAATTTGTCATG	10_-_72843	NM_181650	-	'PA'	85354703	85354723	444	227	416	161	375	1	1	1	1	1
10	17731044	17731103	10119	59	17731069	7808	9750	0.963534	17731064	17731072	9	AAATTTCCTGGTGGCTGTGT	10_-_73112	NM_028440	-	'PA'	17731057	17731077	2916	2710	3072	1322	2744	0.967485	0.957936	0.963311	0.969208	0.967219
10	121026653	121026710	2009	57	121026677	1063	1932	0.961672	121026676	121026684	9	ACCAAGTCTTTTCCGGAGTT	10_-_73192	NM_001081056	-	'3'UTR'	121024436	121027249	403	281	495	228	525	0.432403	0.571138	0.493028	0.484076	0.499049
10	121024416	121024465	2125	49	121024438	1472	2019	0.950118	121024434	121024441	8	AAGTCATTGGAGTGGGCCTT	10_-_73192	NM_001081056	-	'PA'	121024426	121024446	529	211	509	243	527	0.567597	0.428862	0.506972	0.515924	0.500951
10	5892965	5892992	30	27	5892978	15	30	1	5892978	5892985	8	AAAGCCATTCATTTTGATAA	10_-_73419	NM_024261	-	'exon'	5891401	5893069	3	7	7	8	5	0.0275229	0.106061	0.0853659	0.153846	0.0390625
10	5891384	5891419	423	35	5891402	306	407	0.962175	5891401	5891406	6	AGCTCTCACTGGTTTTTATT	10_-_73419	NM_024261	-	'PA'	5891391	5891411	106	59	75	44	123	0.972477	0.893939	0.914634	0.846154	0.960938
10	30254505	30254541	251	36	30254526	226	244	0.972112	30254519	30254526	8	AAAAATTATGTGATACTCAG	10_-_73681	NM_028604	-	'3'UTR'	30254031	30254918	47	31	44	46	76	1	1	1	1	1
10	111422490	111422535	565	45	111422513	262	539	0.953982	111422512	111422519	8	AATTTCTTCTAAGTCTACAG	10_-_73690	NM_028608	-	'PA'	111422494	111422514	209	114	83	50	83	1	1	1	1	1
10	128235133	128235163	31	30	128235147	19	31	1	128235143	128235155	13	AACGACTTGTGAGTGTCTTC	10_-_73827	NM_178066	-	'extend_3'TUR'	128232092	128237091	13	0	6	5	7	0.0730337	0	0.0512821	0.0641026	0.0507246
10	128237071	128237111	559	40	128237093	428	534	0.955277	128237085	128237094	10	ACCTGGGGAGATGCGCCTCT	10_-_73827	NM_178066	-	'PA'	128237082	128237102	165	54	111	73	131	0.926966	1	0.948718	0.935897	0.949275
10	119578677	119578732	152	55	119578708	40	145	0.953947	119578693	119578724	32	TGTTGTTGTTTTGTTAACTC	10_-_73914	NM_028679	-	'PA'	119578700	119578720	24	11	26	16	68	1	1	1	1	1
10	84582166	84582203	250	37	84582188	189	238	0.952	84582180	84582188	9	AATCTTGGAACTATTATTCC	10_-_74238	NM_028832	-	'PA'	84582168	84582188	60	22	49	23	84	1	1	1	1	1
10	12658001	12658028	29	27	12658014	12	28	0.965517	12658012	12658021	10	ACTTCTGTGAGTTATTTCTT	10_-_74732	NM_001163591	-	'extend_3'TUR'	12654787	12659786	9	1	4	5	9	0.160714	0.0588235	0.0833333	0.151515	0.204545
10	12659772	12659810	177	38	12659794	78	170	0.960452	12659787	12659794	8	AACTGTCTCTCTTTTTATAT	10_-_74732	NM_001163591	-	'PA'	12659777	12659797	47	16	44	28	35	0.839286	0.941176	0.916667	0.848485	0.795455
10	59412399	59412439	801	40	59412418	553	771	0.962547	59412416	59412423	8	ACTTGAGTCTCATCGGCGCC	10_-_74747	NM_029083	-	'PA'	59412413	59412433	377	30	135	88	141	1	1	1	1	1
10	82113162	82113210	122	48	82113178	50	119	0.97541	82113174	82113200	27	TGTGATTTTTGTCATGTGAC	10_-_74782	NM_029102	-	'PA'	82113168	82113188	75	4	10	11	19	1	1	1	1	1
10	87554112	87554192	66	80	87554178	31	64	0.969697	87554126	87554185	60	ACTTCTGGGTGGTTTATACT	10_-_75317	NM_029249	-	'3'UTR'	87554143	87555599	5	18	17	13	11	0.294118	0.382979	0.369565	0.541667	0.647059
10	87554770	87554803	66	33	87554790	43	63	0.954545	87554788	87554794	7	ATTTTGAAAAATCCCCATTT	10_-_75317	NM_029249	-	'3'UTR'	87554143	87555599	6	22	23	8	4	0.352941	0.468085	0.5	0.333333	0.235294
10	87555507	87555540	24	33	87555529	20	24	1	87555514	87555529	16	AAGATATGTTGTGGTTTTTT	10_-_75317	NM_029249	-	'3'UTR'	87554143	87555599	6	7	6	3	2	0.352941	0.148936	0.130435	0.125	0.117647
10	110244089	110244118	94	29	110244105	77	90	0.957447	110244103	110244105	3	TTTAAAAACTTTAAAAAATC	10_-_75630	NR_045979	-	'intron'	110238567	110330075	22	10	21	3	34	1	1	1	1	1
10	43601250	43601283	38	33	43601272	17	37	0.973684	43601259	43601272	14	AATTGCTTTTAGAATCTTTG	10_-_76563	NM_001081054	-	'intron'	43596484	43601278	4	7	9	8	9	0.0740741	0.269231	0.333333	0.4	0.230769
10	43593980	43594011	135	31	43593996	99	129	0.955556	43593995	43593998	4	AAGTACTGGATTTTACTATA	10_-_76563	NM_001081054	-	'PA'	43593986	43594006	50	19	18	12	30	0.925926	0.730769	0.666667	0.6	0.769231
10	25711036	25711069	320	33	25711054	208	311	0.971875	25711052	25711055	4	AGAAATGTGTGTTCTTCATA	10_-_77220	NM_029881	-	'3'UTR'	25710992	25712699	76	56	78	34	67	0.487179	0.352201	0.478528	0.377778	0.496296
10	25710972	25711007	403	35	25710991	328	392	0.972705	25710987	25710991	5	AAATACTGGTTTGCAAACTT	10_-_77220	NM_029881	-	'PA'	25710982	25711002	80	103	85	56	68	0.512821	0.647799	0.521472	0.622222	0.503704
10	83833627	83833671	2211	44	83833652	1254	2141	0.96834	83833645	83833653	9	AACCAGGGCCTTGTTTCGTT	10_-_77976	NM_001004363	-	'extend_3'TUR'	83829064	83834063	613	356	472	228	472	0.764339	0.8	0.752791	0.77027	0.757624
10	83833899	83833937	677	38	83833918	563	652	0.963072	83833917	83833924	8	AATTTGTCTTTTTTTATTTA	10_-_77976	NM_001004363	-	'extend_3'TUR'	83829064	83834063	189	89	155	68	151	0.235661	0.2	0.247209	0.22973	0.242376
10	80258827	80258860	317	33	80258845	240	304	0.958991	80258842	80258846	5	AGCCATGTCGGAATGAGTGG	10_-_78670	NM_023900	-	'PA'	80258834	80258854	28	27	107	39	103	1	1	1	1	1
10	9477532	9477570	183	38	9477556	101	177	0.967213	9477549	9477556	8	AAACTTGAATTTTTCTGCAC	10_-_78808	NM_001081344	-	'3'UTR'	9475345	9480710	45	23	29	24	56	0.28481	0.315068	0.318681	0.387097	0.408759
10	9477659	9477686	25	27	9477671	15	25	1	9477671	9477679	9	TTTGTTTGTTTGTTTGTTTT	10_-_78808	NM_001081344	-	'3'UTR'	9475345	9480710	16	0	2	2	5	0.101266	0	0.021978	0.0322581	0.0364964
10	9479725	9479771	214	46	9479752	82	204	0.953271	9479751	9479760	10	AGTGTTTTATCATTTCAGTA	10_-_78808	NM_001081344	-	'3'UTR'	9475345	9480710	71	34	32	19	48	0.449367	0.465753	0.351648	0.306452	0.350365
10	9480283	9480309	32	26	9480298	20	31	0.96875	9480294	9480299	6	ACAAAGGTCACTTTGTATCT	10_-_78808	NM_001081344	-	'3'UTR'	9475345	9480710	11	4	5	4	7	0.0696203	0.0547945	0.0549451	0.0645161	0.0510949
10	9480361	9480391	62	30	9480378	37	59	0.951613	9480373	9480379	7	AAAAGACTTTGTGCCGTTGT	10_-_78808	NM_001081344	-	'3'UTR'	9475345	9480710	9	9	16	12	13	0.056962	0.123288	0.175824	0.193548	0.0948905
10	126627419	126627455	144	36	126627435	61	137	0.951389	126627435	126627443	9	ATGCCACACCCGTCTTCTGT	10_-_80904	NM_030714	-	'PA'	126627424	126627444	23	12	29	16	57	1	1	1	1	1
10	5987050	5987102	9143	52	5987073	3685	8893	0.972657	5987070	5987077	8	ATATTCACTGTTTTTTTATT	10_-_83397	NM_031185	-	'PA'	5987060	5987080	2486	1684	2268	868	1587	1	1	1	1	1
10	70385562	70385613	1214	51	70385586	476	1175	0.967875	70385579	70385599	21	ACATGGGATATGTGTCTCTT	10_-_83675	NM_031397	-	'extend_3'TUR'	70382848	70387847	200	88	262	144	481	0.952381	0.907216	0.956204	0.986301	0.967807
10	62781791	62781824	77	33	62781806	34	77	1	62781806	62781814	9	ATCTTGTTTTAAAGTCTTAT	10_-_93759	NM_019812	-	'3'UTR'	62781753	62783383	21	7	24	12	13	0.3	0.162791	0.263736	0.461538	0.224138
10	62781740	62781784	219	44	62781763	86	211	0.96347	62781755	62781769	15	TTCCCGTTAACTTCCATTGT	10_-_93759	NM_019812	-	'PA'	62781743	62781763	49	36	67	14	45	0.7	0.837209	0.736264	0.538462	0.775862
10	62078739	62078847	2829	108	62078771	847	2708	0.957229	62078761	62078781	21	TGTTTTTATTCTGTGTTAAG	10_-_94213	NM_053183	-	'PA'	62078761	62078781	517	357	628	378	828	0.948624	0.959677	0.958779	0.969231	0.944128
10	52056821	52056930	546	109	52056891	139	523	0.957875	52056840	52056917	78	AAAATAAATGTTTTCTCTTT	10_-_94221	NM_001199272	-	'3'UTR'	52056830	52059528	95	95	120	93	120	0.405983	0.56213	0.524017	0.645833	0.470588
10	52057944	52058001	344	57	52057986	256	330	0.959302	52057972	52057987	16	ACTGTTTGCTCCTGATAGGC	10_-_94221	NM_001199272	-	'3'UTR'	52056830	52059528	101	48	68	34	79	0.431624	0.284024	0.296943	0.236111	0.309804
10	52058142	52058177	185	35	52058162	81	178	0.962162	52058156	52058164	9	GCTCATTTATGGTCTCTGGG	10_-_94221	NM_001199272	-	'3'UTR'	52056830	52059528	38	26	41	17	56	0.162393	0.153846	0.179039	0.118056	0.219608
10	126637794	126637821	45	27	126637808	26	43	0.955556	126637806	126637810	5	ACCCAGTCTGGAGAACTGCT	10_+_100038591	NR_045716	+	'exon'	126637581	126639699	15	4	8	2	14	0.6	0.666667	0.666667	0.333333	0.666667
10	126642099	126642135	27	36	126642117	11	27	1	126642110	126642127	18	ATTAGGGACTAAAGCCATGG	10_+_100038591	NR_045716	+	'extend_3'TUR'	126639700	126644699	10	2	4	4	7	0.4	0.333333	0.333333	0.666667	0.333333
10	25799241	25799267	22	26	25799253	16	21	0.954545	25799253	25799260	8	AAATTACTGCGTTGGAGTGT	10_+_100040851	NR_028030	+	'PA'	25799243	25799263	7	3	3	2	6	1	1	1	1	1
10	81129487	81129514	31	27	81129500	25	31	1	81129500	81129505	6	ATGTGTATTGTTGTGATAGA	10_+_100233208.1	NM_001142963	+	'3'UTR'	81126977	81130106	6	6	10	2	7	1	1	1	1	1
10	126508142	126508178	47	36	126508156	26	47	1	126508155	126508171	17	ATACTGTCTCTTTTTAAATT	10_+_100504703	NR_040660	+	'PA'	126508147	126508167	12	1	13	8	13	1	1	1	1	1
10	102881992	102882024	89	32	102882007	45	86	0.966292	102882007	102882012	6	AACGGAGTTCGTGTCCCTCA	10_+_103098	NM_001252330	+	'PA'	102882003	102882023	17	27	27	11	4	1	1	1	1	1
10	127758388	127758421	131	33	127758405	71	127	0.969466	127758400	127758409	10	AAAACCGCTAGTGTGGGATT	10_+_103135	NM_001252327	+	'PA'	127758404	127758424	38	18	21	16	34	1	1	1	1	1
10	85351081	85351118	354	37	85351100	277	338	0.954802	85351099	85351102	4	ATTCCTTAACAGGCCATCTG	10_+_103136	NM_133993	+	'3'UTR'	85350888	85351848	81	66	78	48	65	0.30916	0.331658	0.27957	0.315789	0.287611
10	85351656	85351688	192	32	85351673	135	186	0.96875	85351672	85351676	5	ATAAAGCCTTCTGGACTTAA	10_+_103136	NM_133993	+	'3'UTR'	85350888	85351848	47	38	52	15	34	0.179389	0.190955	0.18638	0.0986842	0.150442
10	85351823	85351864	596	41	85351841	292	573	0.961409	85351841	85351852	12	AAATTCACCTCACTTTGACT	10_+_103136	NM_133993	+	'PA'	85351838	85351858	128	93	141	88	123	0.48855	0.467337	0.505376	0.578947	0.544248
10	75400472	75400506	205	34	75400491	120	196	0.956098	75400486	75400493	8	AGCCTGCTGTGTGCCCATTT	10_+_103172	NM_175329	+	'extend_3'TUR'	75400480	75405479	12	7	70	23	84	1	1	1	1	1
10	39374611	39374645	266	34	39374629	221	254	0.954887	39374628	39374631	4	AAGAATGTGTTTATCTCAGT	10_+_103213	NM_134000	+	'3'UTR'	39374336	39375113	66	37	60	28	63	0.929577	0.880952	0.895522	0.965517	0.926471
10	39348665	39348691	24	26	39348679	13	23	0.958333	39348673	39348682	10	AACAAACATGTCTAAAACCT	10_+_103213	NM_134000	+	'intron'	39346466	39354340	5	5	7	1	5	0.0704225	0.119048	0.104478	0.0344828	0.0735294
10	80103442	80103508	2694	66	80103485	1258	2576	0.956199	80103468	80103492	25	ATCCCAGAATGTTGGCCTGG	10_+_103236	NM_001159591	+	'3'UTR'	80102822	80103516	712	126	650	326	762	0.967391	0.947368	0.967262	0.973134	0.962121
10	84580307	84580420	4309	113	84580328	2592	4202	0.975168	84580326	84580382	57	AAAGATGGAATGTTTCATAA	10_+_103266	NM_001013028	+	'3'UTR'	84577440	84580492	1108	422	1103	451	1118	0.882869	0.870103	0.87401	0.867308	0.865995
10	84580478	84580537	360	59	84580515	105	345	0.958333	84580492	84580522	31	AAATGTCTAGATTTCGTCAT	10_+_103266	NM_001013028	+	'extend_3'TUR'	84580493	84585492	84	36	87	38	100	0.0669323	0.0742268	0.0689382	0.0730769	0.0774593
10	86301109	86301145	208	36	86301125	147	201	0.966346	86301125	86301134	10	ATCTCCTGGTATGTGTGTTA	10_+_103466	NM_175331	+	'PA'	86301124	86301144	72	23	44	15	47	1	1	1	1	1
10	88206789	88206858	9055	69	88206837	4775	8612	0.951077	88206834	88206841	8	AACGAGATGTCTTTAGTGTC	10_+_104303	NM_025859	+	'extend_3'TUR'	88205948	88210947	2440	806	1897	933	2536	0.965954	0.946009	0.960993	0.976963	0.96979
10	77061455	77061496	5977	41	77061476	4805	5700	0.953656	77061475	77061477	3	ACTTTGATTTCTTTGTTTTG	10_+_108705	NM_145925	+	'PA'	77061467	77061487	1843	705	980	557	1615	0.983983	0.969739	0.976096	0.99287	0.980571
10	66719042	66719088	1337	46	66719066	963	1286	0.961855	66719063	66719067	5	AAGCTGGATGTTACAGTTCT	10_+_108829	NM_001242396	+	'PA'	66719064	66719084	334	191	284	149	328	0.878947	0.872146	0.931148	0.89759	0.959064
10	4533451	4533498	307	47	4533479	199	292	0.95114	4533478	4533487	10	AAAGGAAGACAGTTGTTTTA	10_+_108853	NM_175374	+	'3'UTR'	4533336	4534654	79	59	63	25	66	1	1	1	1	1
10	79138850	79138889	978	39	79138872	497	938	0.9591	79138869	79138876	8	TCTGCCTTGCTGGTCACCTG	10_+_110012	NM_148934	+	'PA'	79138861	79138881	302	90	191	78	277	1	1	1	1	1
10	74645510	74645595	332	85	74645527	175	318	0.957831	74645525	74645556	32	ATTGTGGGGGCCACAGCCAT	10_+_110279	NM_001081412	+	'3'UTR'	74645075	74647668	94	26	73	33	92	0.492147	0.356164	0.483444	0.402439	0.420091
10	74647647	74647681	417	34	74647665	383	398	0.954436	74647664	74647665	2	ACTTCGGTTTGTGGTGGTTT	10_+_110279	NM_001081412	+	'PA'	74647658	74647678	97	47	78	49	127	0.507853	0.643836	0.516556	0.597561	0.579909
10	57887412	57887463	3753	51	57887432	1613	3630	0.967226	57887432	57887438	7	ATTCATAGTGTGTTACATAT	10_+_110829	NM_001193303	+	'PA'	57887429	57887449	930	671	810	412	807	0.898551	0.906757	0.921502	0.936364	0.942757
10	107851867	107851917	920	50	107851885	474	889	0.966304	107851884	107851902	19	AAATATCCTTGGTATTTAGG	10_+_114774	NM_054056	+	'extend_3'TUR'	107851448	107856447	146	204	257	99	183	0.879518	0.886957	0.937956	0.868421	0.910448
10	107779828	107779876	100	48	107779852	21	96	0.96	107779842	107779868	27	AAAAGAAAAGGAAAGGAAAG	10_+_114774	NM_054056	+	'intron'	107770368	107819785	20	26	17	15	18	0.120482	0.113043	0.0620438	0.131579	0.0895522
10	126458030	126458055	29	25	126458044	19	29	1	126458041	126458044	4	TTCTTATGGTGGCTGTAGTT	10_+_11567	NM_009635	+	'PA'	126458040	126458060	1	3	11	0	14	1	1	1	0	1
10	127556361	127556397	225	36	127556381	101	215	0.955556	127556380	127556383	4	AGAAAAGAAAGAAAAGGTAA	10_+_116848	NM_054078	+	'exon'	127556326	127556556	147	14	18	14	22	0.438806	0.12844	0.168224	0.21875	0.142857
10	127566331	127566374	579	43	127566358	327	554	0.956822	127566353	127566359	7	ACTCAAGATTGCATGTTTCT	10_+_116848	NM_054078	+	'PA'	127566349	127566369	188	95	89	50	132	0.561194	0.87156	0.831776	0.78125	0.857143
10	69478538	69478568	46	30	69478552	16	44	0.956522	69478551	69478558	8	ACATGAATGCAGATGTATAT	10_+_11735	NM_009670	+	'3'UTR'	69478382	69490184	9	3	12	10	10	0.0612245	0.046875	0.0888889	0.0819672	0.0502513
10	69487168	69487210	49	42	69487180	12	48	0.979592	69487180	69487199	20	ACCCGCCTCACAGAACACAA	10_+_11735	NM_009670	+	'3'UTR'	69478382	69490184	8	10	9	12	9	0.0544218	0.15625	0.0666667	0.0983607	0.0452261
10	69488108	69488143	293	35	69488128	137	285	0.972696	69488123	69488129	7	ACTTGGGTTCCACAGTGTTC	10_+_11735	NM_009670	+	'3'UTR'	69478382	69490184	61	35	66	54	69	0.414966	0.546875	0.488889	0.442623	0.346734
10	69490002	69490039	271	37	69490024	148	262	0.96679	69490016	69490024	9	GTTTGCTTGACTTTCTTCAA	10_+_11735	NM_009670	+	'3'UTR'	69478382	69490184	63	16	42	38	103	0.428571	0.25	0.311111	0.311475	0.517588
10	57508241	57508271	47	30	57508256	24	45	0.957447	57508256	57508262	7	ATATGATAGCTGGTTGTCAT	10_+_12140	NM_021272	+	'PA'	57508246	57508266	7	22	10	1	5	1	1	1	1	1
10	79174692	79174743	5173	51	79174713	4487	5007	0.96791	79174713	79174716	4	ATGTGTGTGTCACTACTTGA	10_+_12215	NM_009768	+	'3'UTR'	79174303	79174724	1568	393	1097	495	1454	0.960196	0.958537	0.975111	0.964912	0.96037
10	96082225	96082278	2575	53	96082259	1788	2468	0.958447	96082254	96082263	10	AATCAATCTCTTGTCATGAT	10_+_12226	NM_007569	+	'3'UTR'	96081278	96085445	793	229	396	335	715	0.970624	1	0.994975	0.997024	0.994437
10	43303262	43303300	461	38	43303281	335	442	0.958785	43303281	43303288	8	AAACAGTAGACATTTCCCAT	10_+_12484	NM_009846	+	'3'UTR'	43302572	43304071	149	125	58	48	62	0.167416	0.166223	0.122105	0.142433	0.133621
10	43304038	43304089	2586	51	43304068	867	2476	0.957463	43304065	43304072	8	AGAGAGCAGTCTGTTGAATT	10_+_12484	NM_009846	+	'PA'	43304061	43304081	741	627	417	289	402	0.832584	0.833777	0.877895	0.857567	0.866379
10	128349848	128349907	14255	59	128349871	6105	13596	0.953771	128349870	128349879	10	TAAAAAAGGAGATGGTCTCA	10_+_12512	NM_007653	+	'PA'	128349864	128349884	11993	4533	11150	5551	13653	0.998585	0.999118	0.999641	0.9991	0.999341
10	126504307	126504366	7589	59	126504340	2120	7359	0.969693	126504331	126504343	13	AGTATGGTCTTTATTTTTCT	10_+_12567	NM_009870	+	'PA'	126504328	126504348	1992	833	1843	838	1853	0.991045	0.991667	0.992461	0.995249	0.990909
10	79634377	79634414	456	37	79634398	374	440	0.964912	79634397	79634400	4	AATCTCGCTCTGACCATTTC	10_+_12696	NM_007705	+	'PA'	79634388	79634408	153	54	86	51	96	1	1	1	1	1
10	79457430	79457478	46	48	79457456	22	44	0.956522	79457455	79457473	19	ATCTCTCTCTGGCCTGGAAC	10_+_12798	NM_007725	+	'3'UTR'	79457360	79458145	9	7	10	8	10	0.0566038	0.0921053	0.0917431	0.156863	0.104167
10	79457730	79457760	50	30	79457743	25	48	0.96	79457743	79457747	5	AAAGAAAACAAGGGGTTTTG	10_+_12798	NM_007725	+	'3'UTR'	79457360	79458145	11	5	13	4	15	0.0691824	0.0657895	0.119266	0.0784314	0.15625
10	79458412	79458450	215	38	79458429	102	208	0.967442	79458427	79458432	6	AGTAGGAGACATCTGAGAAT	10_+_12798	NM_007725	+	'extend_3'TUR'	79458146	79463145	58	36	53	24	37	0.36478	0.473684	0.486239	0.470588	0.385417
10	79458933	79458970	173	37	79458954	102	168	0.971098	79458947	79458954	8	AGTCCTTGGGGAGAGGAGAC	10_+_12798	NM_007725	+	'extend_3'TUR'	79458146	79463145	70	27	25	15	31	0.440252	0.355263	0.229358	0.294118	0.322917
10	34116863	34116905	645	42	34116884	262	615	0.953488	34116882	34116891	10	ACCTTTATTCTGTGCTGAGT	10_+_12813	NM_009925	+	'PA'	34116881	34116901	231	68	32	31	253	0.958506	0.906667	1	1	0.976834
10	127798219	127798370	947	151	127798269	217	900	0.95037	127798264	127798357	94	AGGGGCCTTTAAGACTTAAG	10_+_12974	NM_026444	+	'3'UTR'	127798189	127799535	253	99	234	111	203	0.198587	0.136929	0.210054	0.200361	0.18371
10	127799494	127799562	4018	68	127799531	2366	3870	0.963166	127799528	127799535	8	AATGTTTGAGCTTGCTCTTA	10_+_12974	NM_026444	+	'PA'	127799525	127799545	1021	624	880	443	902	0.801413	0.863071	0.789946	0.799639	0.81629
10	110376529	110376591	1676	62	110376550	1133	1622	0.96778	110376547	110376568	22	ATTTGGGTACCACCTCTTAA	10_+_13008	NM_007792	+	'3'UTR'	110376344	110376570	339	226	521	196	340	1	1	1	1	1
10	77890309	77890385	8221	76	77890364	4133	7837	0.95329	77890364	77890367	4	ATATGAATTGTGTCCTTAGT	10_+_13014	NM_007793	+	'PA'	77890357	77890377	2126	766	2002	952	1991	1	1	1	1	1
10	80655726	80655760	180	34	80655743	98	174	0.966667	80655741	80655749	9	ACTGTCGCCTGTCTCCCACG	10_+_13144	NM_007828	+	'3'UTR'	80655690	80655942	63	12	37	10	52	1	1	1	1	1
10	96980747	96980811	9702	64	96980785	5312	9322	0.960833	96980785	96980794	10	ATTCAAAAGATATTTTGTAA	10_+_13179	NM_007833	+	'3'UTR'	96980290	96980796	1660	780	1335	1065	4482	0.988684	0.993631	0.984513	0.986111	0.989186
10	60557058	60557085	21	27	60557068	5	20	0.952381	60557067	60557076	10	ATGGGCTCAGCTTCTAGAAC	10_+_13180	NM_025273	+	'PA'	60557067	60557087	4	1	1	2	12	1	1	1	1	1
10	126733320	126733363	2559	43	126733340	1448	2481	0.969519	126733340	126733347	8	AACAGCCTCTCACTTTTTCT	10_+_13198	NM_007837	+	'PA'	126733334	126733354	633	98	675	264	811	0.901709	0.942308	0.989736	0.977778	0.977108
10	79417739	79417776	366	37	79417757	236	353	0.964481	79417756	79417764	9	AAAGAAGAGTGGCTTTTTTG	10_+_13496	NM_007880	+	'PA'	79417753	79417773	102	55	77	54	65	1	1	1	1	1
10	97144329	97144356	33	27	97144345	20	32	0.969697	97144339	97144346	8	ATATGGTCTTGTGAAAAAGT	10_+_13516	NM_007884	+	'3'UTR'	97143905	97144534	9	2	1	0	20	1	1	1	0	1
10	79652737	79652769	76	32	79652753	55	73	0.960526	79652751	79652760	10	AAGCGTGGGCCTCTCTGTTA	10_+_13637	NM_007909	+	'PA'	79652745	79652765	23	15	7	5	23	1	1	1	1	1
10	67004917	67004950	327	33	67004935	264	313	0.957187	67004932	67004935	4	ATTCTGGTTGCAGAGATCAT	10_+_13654	NM_010118	+	'PA'	67004926	67004946	20	45	81	32	135	1	1	1	1	1
10	25243299	25243340	4033	41	25243320	3140	3866	0.958592	25243319	25243322	4	ATAAATGTGTCACTTCTCTT	10_+_13822	NM_013511	+	'PA'	25243314	25243334	799	548	842	513	1164	1	1	1	1	1
10	93604724	93604761	65	37	93604738	27	65	1	93604736	93604751	16	ACTTTCTGGTCATAACTGTT	10_+_13998	NM_053072	+	'3'UTR'	93604535	93608084	23	15	11	4	12	0.657143	0.416667	0.297297	0.25	0.5
10	93608068	93608097	86	29	93608083	66	83	0.965116	93608082	93608085	4	ACTGCTGGTGTGAAGTCCTT	10_+_13998	NM_053072	+	'PA'	93608074	93608094	12	21	26	12	12	0.342857	0.583333	0.702703	0.75	0.5
10	42549064	42549107	2773	43	42549088	1779	2636	0.950595	42549081	42549090	10	CAGAAGTGTGGGCTGTGCAT	10_+_140740	NM_153055	+	'3'UTR'	42548841	42552320	650	379	712	326	569	0.576241	0.582181	0.612737	0.585278	0.472199
10	42549729	42549766	358	37	42549746	202	346	0.96648	42549745	42549751	7	ATTTTATGTTTGTAATCGTG	10_+_140740	NM_153055	+	'3'UTR'	42548841	42552320	100	26	71	30	119	0.0886525	0.0399386	0.0611015	0.05386	0.0987552
10	42550173	42550215	1434	42	42550193	765	1399	0.975593	42550190	42550200	11	AAAAATGAATTTTTTGTTAT	10_+_140740	NM_153055	+	'3'UTR'	42548841	42552320	323	193	301	165	417	0.286348	0.296467	0.259036	0.29623	0.346058
10	42552293	42552341	310	48	42552316	130	295	0.951613	42552307	42552325	19	ATTATTTTTTCCCTGATTTC	10_+_140740	NM_153055	+	'PA'	42552310	42552330	49	46	71	35	94	0.0434397	0.0706605	0.0611015	0.0628366	0.0780083
10	41628212	41628245	240	33	41628229	142	228	0.95	41628227	41628232	6	AGTTTGCTTTATTAATTTCA	10_+_140742	NM_001162908	+	'3'UTR'	41627165	41628242	79	21	42	10	76	1	1	1	1	1
10	24318443	24318508	24092	65	24318483	7727	22890	0.950108	24318481	24318488	8	ATGAAAGGCTTGGCTGTTCA	10_+_14219	NM_010217	+	'PA'	24318478	24318498	5190	12498	15319	5834	12131	0.972456	0.990725	0.991264	0.989988	0.993611
10	34328977	34329036	88	59	34329017	53	84	0.954545	34328988	34329020	33	AAATGATGGAGTTTGCTCTA	10_+_14302	NM_010237	+	'3'UTR'	34328378	34331036	26	7	24	5	22	0.144444	0.0933333	0.244898	0.0909091	0.141935
10	34329467	34329499	89	32	34329483	60	85	0.955056	34329483	34329491	9	AGCTCCATAGATTCTGGAAT	10_+_14302	NM_010237	+	'3'UTR'	34328378	34331036	21	10	16	11	27	0.116667	0.133333	0.163265	0.2	0.174194
10	34331325	34331351	39	26	34331339	35	38	0.974359	34331339	34331341	3	ACTTTTCGTGTAATGTTTTA	10_+_14302	NM_010237	+	'extend_3'TUR'	34331037	34336036	9	5	5	7	12	0.05	0.0666667	0.0510204	0.127273	0.0774194
10	34331003	34331088	372	85	34331034	225	356	0.956989	34331017	34331064	48	AAAATGACTATCCGTTCCTG	10_+_14302	NM_010237	+	'PA'	34331026	34331046	124	53	53	32	94	0.688889	0.706667	0.540816	0.581818	0.606452
10	39284728	39284756	26	28	39284741	14	25	0.961538	39284739	39284745	7	ATTTAAATGGTCTAAACCCA	10_+_14360	NM_008054	+	'3'UTR'	39283779	39285180	12	1	3	4	5	1	1	1	1	1
10	126609368	126609404	370	36	126609385	294	355	0.959459	126609385	126609391	7	ATTTTTACTTGTGTCTCTGT	10_+_14421	NM_008080	+	'3'UTR'	126608890	126609396	123	24	53	29	126	0.938931	0.857143	0.898305	1	0.969231
10	126605561	126605591	23	30	126605573	8	22	0.956522	126605572	126605584	13	AACACATTTTCAATTTTTTT	10_+_14421	NM_001244618	+	'PA'	126605569	126605589	8	4	6	0	4	0.0610687	0.142857	0.101695	0	0.0307692
10	56110196	56110272	13928	76	56110221	6351	13304	0.955198	56110218	56110227	10	AAAGATAACCTGCATGTCTT	10_+_14609	NM_010288	+	'PA'	56110215	56110235	3228	1775	1414	1794	5093	1	1	1	1	1
10	42422242	42422286	1219	44	42422261	1003	1181	0.968827	42422260	42422268	9	AAAATTGTAATGTTGTAATT	10_+_14628	NM_172416	+	'PA'	42422258	42422278	389	83	249	127	333	0.98731	0.976471	0.976471	0.954887	0.985207
10	51216288	51216314	22	26	51216300	9	21	0.954545	51216298	51216306	9	AAACAAATGAAATGAGATAT	10_+_14728	NM_013532	+	'3'UTR'	51216051	51216417	0	0	4	1	16	0	0	0.25	0.25	0.5
10	51216387	51216425	34	38	51216400	21	33	0.970588	51216400	51216416	17	AAAGAAAGTGTCTTCAAAAT	10_+_14728	NM_013532	+	'3'UTR'	51216051	51216417	2	0	12	3	16	1	0	0.75	0.75	0.5
10	81028887	81028926	740	39	81028909	466	708	0.956757	81028902	81028910	9	GGTTTGTTTATGATTTCTTT	10_+_14797	NM_010347	+	'3'UTR'	81028439	81029116	186	56	137	81	248	0.23221	0.275862	0.286013	0.252336	0.260504
10	81029082	81029125	2155	43	81029107	925	2048	0.950348	81029104	81029110	7	GCCACTGTGTCCCTGCTTCT	10_+_14797	NM_010347	+	'PA'	81029106	81029126	615	147	342	240	704	0.76779	0.724138	0.713987	0.747664	0.739496
10	36721621	36721665	592	44	36721643	265	563	0.951014	36721639	36721648	10	AGCTGATTTTTCCATCTTTT	10_+_15182	NM_008229	+	'3'UTR'	36721366	36721694	112	108	154	69	120	0.13913	0.137755	0.160584	0.138833	0.125392
10	36721669	36721717	3567	48	36721694	2225	3439	0.964116	36721692	36721697	6	ATCGTTTTCTGTCTGTTTAT	10_+_15182	NM_008229	+	'PA'	36721684	36721704	693	676	805	428	837	0.86087	0.862245	0.839416	0.861167	0.874608
10	13870357	13870407	71	50	13870395	29	69	0.971831	13870368	13870396	29	AACATGTTGATCTATATACT	10_+_15273	NM_010437	+	'3'UTR'	13869543	13871184	10	5	14	18	22	0.041841	0.0746269	0.0614035	0.138462	0.0707395
10	13871157	13871197	884	40	13871180	487	852	0.963801	13871173	13871181	9	TGAAGTGTCTAGTTCTTGTG	10_+_15273	NM_010437	+	'PA'	13871174	13871194	214	59	201	105	273	0.895397	0.880597	0.881579	0.807692	0.877814
10	57232654	57232690	673	36	57232674	356	656	0.97474	57232670	57232676	7	ACTATTGTTTGTTGAGTCGT	10_+_15500	NM_008297	+	'3'UTR'	57232005	57232949	235	98	135	66	122	0.818815	0.859649	0.865385	0.795181	0.807947
10	57232924	57232975	139	51	57232941	106	135	0.971223	57232936	57232949	14	AAAAATTCCTTCTCATTGTT	10_+_15500	NM_008297	+	'PA'	57232939	57232959	52	16	21	17	29	0.181185	0.140351	0.134615	0.204819	0.192053
10	19330012	19330049	992	37	19330031	790	945	0.952621	19330030	19330032	3	AAAACTCACTTGGATATTCA	10_+_15979	NM_010511	+	'PA'	19330021	19330041	325	130	181	84	225	1	1	1	1	1
10	87393621	87393664	743	43	87393640	250	708	0.952894	87393639	87393649	11	AACATCGTCTTTAGGAGTGT	10_+_16000	NM_010512	+	'3'UTR'	87393446	87399792	116	17	290	109	176	0.67052	0.653846	0.700483	0.64881	0.588629
10	87394361	87394400	166	39	87394380	104	162	0.975904	87394379	87394391	13	ATGTAAAACTCTGTTGTTGT	10_+_16000	NM_010512	+	'3'UTR'	87393446	87399792	28	4	60	30	40	0.16185	0.153846	0.144928	0.178571	0.133779
10	87399741	87399808	221	67	87399785	95	210	0.950226	87399782	87399799	18	AACTGGTTCCTTTGATGTAG	10_+_16000	NM_010512	+	'PA'	87399782	87399802	29	5	64	29	83	0.16763	0.192308	0.154589	0.172619	0.277592
10	128395319	128395381	521	62	128395338	373	498	0.955854	128395335	128395341	7	AAAATCTCTGGCTGCTTTAT	10_+_16404	NM_008398	+	'PA'	128395330	128395350	122	14	76	65	221	1	1	1	1	1
10	38829968	38830009	906	41	38829987	292	881	0.972406	38829986	38829994	9	GCTTCCTATTTCTTATTTGA	10_+_16775	NM_010681	+	'PA'	38829984	38830004	265	73	158	79	306	1	1	1	1	1
10	7435872	7435926	346	54	7435900	194	329	0.950867	7435889	7435900	12	AAAACAGTCTGTTTTTGAAT	10_+_16798	NM_010690	+	'3'UTR'	7432809	7436259	75	66	72	43	73	0.207756	0.267206	0.224299	0.248555	0.206799
10	7436228	7436279	1182	51	7436256	597	1126	0.952623	7436246	7436260	15	AATTATGACTGGAAAGCTGA	10_+_16798	NM_010690	+	'PA'	7436249	7436269	286	181	249	130	280	0.792244	0.732794	0.775701	0.751445	0.793201
10	80612316	80612359	532	43	80612334	199	514	0.966165	80612334	80612339	6	ATCGCTCCGGTAGAATCCAC	10_+_16969	NM_010731	+	'3'UTR'	80611181	80614402	120	75	127	67	125	0.298507	0.334821	0.348901	0.303167	0.286697
10	80614932	80614984	1092	52	80614966	676	1060	0.970696	80614947	80614967	21	ATCTCTTTGCCTGGTCTCTG	10_+_16969	NM_010731	+	'extend_3'TUR'	80614403	80619402	260	137	225	143	295	0.646766	0.611607	0.618132	0.647059	0.676606
10	76019862	76019900	415	38	76019883	304	404	0.973494	76019882	76019887	6	ATTCAAGTCTTCCTTTTGCA	10_+_16987	NM_146006	+	'extend_3'TUR'	76016680	76021679	94	19	154	70	67	0.189899	0.157025	0.225476	0.26616	0.229452
10	76016642	76016697	1311	55	76016677	917	1289	0.983219	76016671	76016681	11	AACCACCTGCCTTCCTGAGA	10_+_16987	NM_146006	+	'PA'	76016669	76016689	373	94	461	163	198	0.753535	0.77686	0.674963	0.619772	0.678082
10	92947553	92947653	1789	100	92947619	1021	1703	0.951928	92947612	92947624	13	ATTTTAAAGTGTCATTTTTG	10_+_16993	NM_008517	+	'3'UTR'	92947526	92947641	322	222	483	214	462	1	1	1	1	1
10	97035314	97035353	712	39	97035336	297	686	0.963483	97035335	97035338	4	CATCTTGGTGTTCATTTTTG	10_+_17022	NM_008524	+	'PA'	97035327	97035347	184	25	54	54	369	1	1	1	1	1
10	43667654	43667682	53	28	43667668	31	51	0.962264	43667668	43667672	5	AGGCTGGTTTTTGGTCACTG	10_+_170728	NM_130892	+	'PA'	43667658	43667678	13	7	9	5	17	1	1	1	1	1
10	67505230	67505273	43	43	67505262	29	43	1	67505239	67505262	24	AATTTGTAATCTGCTATTCA	10_+_170799	NM_001081346	+	'3'UTR'	67504666	67506612	0	17	12	5	9	0	1	1	1	1
10	41206812	41206852	1359	40	41206834	973	1310	0.963944	41206831	41206837	7	AACAGGGTTTATGCTCTGTG	10_+_171580	NM_001164433	+	'PA'	41206826	41206846	349	154	317	142	348	1	1	1	1	1
10	117606037	117606067	107	30	117606053	88	106	0.990654	117606052	117606054	3	AACTTGATGCTTCTGTTTTC	10_+_17245	NM_010785	+	'PA'	117606045	117606065	14	21	32	14	25	1	1	1	1	1
10	126482992	126483024	88	32	126483007	68	84	0.954545	126483007	126483010	4	TAGGCTGTGTGTGGCTCAGG	10_+_17299	NM_010792	+	'extend_3'TUR'	126482518	126487517	30	9	17	7	21	0.555556	0.391304	0.447368	0.466667	0.42
10	126483397	126483434	99	37	126483420	61	96	0.969697	126483409	126483423	15	ATGTGTTTGAGTGTTTGCCT	10_+_17299	NM_010792	+	'extend_3'TUR'	126482518	126487517	24	14	21	8	29	0.444444	0.608696	0.552632	0.533333	0.58
10	99561473	99561509	40	36	99561487	13	39	0.975	99561485	99561501	17	AGTTTGGTAATTTGATTCAA	10_+_17311	NM_013598	+	'3'UTR'	99551870	99563046	15	5	7	6	6	0.0777202	0.0549451	0.0875	0.0909091	0.0342857
10	99562889	99562922	91	33	99562907	60	87	0.956044	99562899	99562908	10	ATGTGTATGTGTATATACTG	10_+_17311	NM_013598	+	'3'UTR'	99551870	99563046	26	12	7	14	28	0.134715	0.131868	0.0875	0.212121	0.16
10	99563027	99563063	504	36	99563045	236	479	0.950397	99563042	99563047	6	ATAAATCTGCCCTCTCATTT	10_+_17311	NM_013598	+	'PA'	99563036	99563056	152	74	66	46	141	0.787565	0.813187	0.825	0.69697	0.805714
10	17445435	17445493	4331	58	17445459	3102	4152	0.95867	17445455	17445472	18	AAACTTGTTTTCTAAAAGTC	10_+_17684	NM_010828	+	'3'UTR'	17444562	17445480	524	980	953	666	1029	0.983114	0.991903	0.987565	0.995516	0.98187
10	80394451	80394485	95	34	80394469	46	92	0.968421	80394465	80394475	11	CCCTCATCCCCCAGAACAAT	10_+_17873	NM_008655	+	'3'UTR'	80394392	80394949	17	20	30	10	15	0.0899471	0.273973	0.189873	0.125	0.107143
10	80394930	80394965	566	35	80394949	383	548	0.968198	80394947	80394949	3	CGTGTTCTCGTTGTATTTTA	10_+_17873	NM_008655	+	'PA'	80394939	80394959	172	53	128	70	125	0.910053	0.726027	0.810127	0.875	0.892857
10	107715799	107715832	171	33	107715817	89	164	0.959064	107715815	107715820	6	ATAGTAGCTGACTGTATTAT	10_+_17931	NM_027892	+	'extend_3'TUR'	107714632	107719631	49	26	33	18	38	0.081803	0.0525253	0.0486009	0.0610169	0.0583717
10	107715859	107715907	166	48	107715879	44	160	0.963855	107715877	107715893	17	CCATTTTAAAAGGTCATTGT	10_+_17931	NM_027892	+	'extend_3'TUR'	107714632	107719631	30	33	53	15	29	0.0500835	0.0666667	0.078056	0.0508475	0.0445469
10	107716415	107716481	1173	66	107716443	792	1116	0.951407	107716437	107716460	24	ATTTTAAATGTGTGAACTTT	10_+_17931	NM_027892	+	'extend_3'TUR'	107714632	107719631	283	208	229	108	288	0.472454	0.420202	0.337261	0.366102	0.442396
10	107716681	107716718	732	37	107716700	490	699	0.954918	107716697	107716704	8	AATCTGAGAGCTAGTTTTTT	10_+_17931	NM_027892	+	'extend_3'TUR'	107714632	107719631	129	119	210	91	150	0.215359	0.240404	0.309278	0.308475	0.230415
10	107716797	107716834	271	37	107716818	194	262	0.96679	107716811	107716820	10	AAACTTCTGGTTTTTTCCTT	10_+_17931	NM_027892	+	'extend_3'TUR'	107714632	107719631	50	47	62	28	75	0.0834725	0.0949495	0.0913108	0.0949153	0.115207
10	107714614	107714663	271	49	107714631	204	258	0.95203	107714630	107714632	3	AGATATGCCTCAGATATTTA	10_+_17931	NM_027892	+	'PA'	107714621	107714641	50	49	78	27	54	0.0834725	0.0989899	0.114875	0.0915254	0.0829493
10	127485625	127485729	28550	104	127485683	5775	27169	0.951629	127485682	127485693	12	GATGGACTCAGCAGGTGCTA	10_+_17938	NM_013608	+	'PA'	127485683	127485703	12115	7068	13266	5432	11471	1	1	1	1	1
10	58834671	58834726	939	55	58834704	284	893	0.951012	58834689	58834712	24	AAAAAGTCTCTGTGTGGTAT	10_+_18451	NM_011030	+	'3'UTR'	58833823	58836052	370	43	114	102	264	0.682657	0.530864	0.497817	0.618182	0.529058
10	58835666	58835709	198	43	58835682	83	189	0.954545	58835680	58835692	13	TGAGATCTGTTATTATGGAA	10_+_18451	NM_011030	+	'3'UTR'	58833823	58836052	62	11	31	21	64	0.114391	0.135802	0.135371	0.127273	0.128257
10	58836013	58836071	339	58	58836051	155	323	0.952802	58836025	58836051	27	ACTTTCTATGTACAACTGTT	10_+_18451	NM_011030	+	'PA'	58836042	58836062	81	19	61	37	125	0.149446	0.234568	0.266376	0.224242	0.250501
10	80782695	80782734	852	39	80782714	473	832	0.976526	80782711	80782719	9	AAACAGCTCCTCTCCGGTGA	10_+_18717	NM_008844	+	'PA'	80782709	80782729	304	103	149	70	206	1	1	1	1	1
10	44878744	44878821	4373	77	44878801	1536	4204	0.961354	44878780	44878803	24	GGAGGCTTTAGTTTTGGTTC	10_+_19072	NM_011156	+	'PA'	44878791	44878811	1133	549	979	463	1080	0.895652	0.886914	0.873327	0.883588	0.900751
10	127466905	127466939	117	34	127466921	88	114	0.974359	127466920	127466931	12	AATGGGCCTCAATCCTTGAA	10_+_19075	NM_008921	+	'3'UTR'	127466842	127467086	7	54	32	8	13	0.162791	0.242152	0.216216	0.123077	0.166667
10	127467025	127467063	306	38	127467047	152	292	0.954248	127467040	127467048	9	AGAAGTTTGTAAAATGTATT	10_+_19075	NM_008921	+	'3'UTR'	127466842	127467086	21	115	75	33	48	0.488372	0.515695	0.506757	0.507692	0.615385
10	127467066	127467104	158	38	127467086	74	151	0.955696	127467084	127467094	11	AGACTTCTGATGTGCTCGGT	10_+_19075	NM_008921	+	'PA'	127467076	127467096	15	54	41	24	17	0.348837	0.242152	0.277027	0.369231	0.217949
10	59765319	59765366	10569	47	59765345	6273	10228	0.967736	59765342	59765347	6	AGATCTGGCCTTGTGTCTCT	10_+_19156	NM_011179	+	'PA'	59765338	59765358	3045	753	1888	1007	3535	1	1	1	1	1
10	115821192	115821220	35	28	115821204	10	35	1	115821204	115821210	7	ACACTAAAGTGTTCATGGCT	10_+_19263	NM_029928	+	'3'UTR'	115820932	115826594	2	3	19	6	5	0.153846	0.3	0.413043	0.461538	0.416667
10	115826574	115826607	62	33	115826588	43	59	0.951613	115826587	115826594	8	AAAGAGTGTCCTGCCTACTA	10_+_19263	NM_029928	+	'PA'	115826584	115826604	11	7	27	7	7	0.846154	0.7	0.586957	0.538462	0.583333
10	28315809	28315871	621	62	28315854	176	601	0.967794	28315824	28315854	31	ATGAGAGCATCCACATTTCA	10_+_19272	NM_008983	+	'3'UTR'	28315662	28317203	181	95	136	55	134	0.724	0.736434	0.666667	0.662651	0.676768
10	28316580	28316611	90	31	28316596	71	87	0.966667	28316596	28316602	7	ATCTTGGCAATTGTCTTTGA	10_+_19272	NM_008983	+	'3'UTR'	28315662	28317203	24	21	20	8	14	0.096	0.162791	0.0980392	0.0963855	0.0707071
10	28317108	28317140	112	32	28317124	90	107	0.955357	28317123	28317129	7	AACATTTACTGATTGAACAT	10_+_19272	NM_008983	+	'3'UTR'	28315662	28317203	23	9	28	15	32	0.092	0.0697674	0.137255	0.180723	0.161616
10	57956898	57956937	1328	39	57956920	876	1274	0.959337	57956915	57956920	6	ATTTCAGGTGTACTTATTTT	10_+_19386	NM_011240	+	'extend_3'TUR'	57956903	57961902	376	175	272	134	317	0.663139	0.528701	0.520076	0.529644	0.616732
10	57957631	57957692	758	61	57957649	364	737	0.972296	57957646	57957667	22	AGCCATGACATTTAAAACAT	10_+_19386	NM_011240	+	'extend_3'TUR'	57956903	57961902	141	133	201	100	162	0.248677	0.401813	0.384321	0.395257	0.315175
10	57958037	57958095	131	58	57958057	55	125	0.954198	57958050	57958062	13	AATCTAGTTAGACCATACAA	10_+_19386	NM_011240	+	'extend_3'TUR'	57956903	57961902	34	12	36	17	26	0.0599647	0.0362538	0.0688337	0.0671937	0.0505837
10	17844918	17844970	1106	52	17844938	375	1078	0.974684	17844937	17844954	18	ACTTTCTCTGGAGAATACAT	10_+_19707	NM_009048	+	'3'UTR'	17844755	17844961	268	187	260	108	255	1	1	1	1	1
10	39594729	39594776	48	47	39594764	24	47	0.979167	39594738	39594765	28	ATTTTGCTTGTTTTGTATAG	10_+_19714	NM_011264	+	'3'UTR'	39594031	39595011	18	5	8	5	11	0.171429	0.16129	0.148148	0.125	0.135802
10	39594989	39595041	277	52	39595009	124	264	0.953069	39595006	39595018	13	AAATACAGTGCTATGACTTT	10_+_19714	NM_011264	+	'PA'	39595001	39595021	87	26	46	35	70	0.828571	0.83871	0.851852	0.875	0.864198
10	79756834	79756879	11914	45	79756857	5632	11327	0.95073	79756856	79756860	5	GATTCTGGGTTTTTGTTTTT	10_+_20054	NM_009091	+	'PA'	79756849	79756869	7230	3567	8448	3236	7729	1	1	1	1	1
10	75723859	75723918	170	59	75723877	84	162	0.952941	75723870	75723902	33	AAAAAGCCATTCTAGGAGAA	10_+_20203	NM_009115	+	'3'UTR'	75722814	75724064	23	13	33	28	65	1	1	1	1	1
10	80267652	80267681	81	29	80267667	49	78	0.962963	80267666	80267669	4	TCTCCCTGTCTGCTGTGTGT	10_+_20222	NM_013651	+	'PA'	80267657	80267677	19	11	22	7	19	1	1	1	1	1
10	61154167	61154212	2337	45	61154194	1591	2297	0.982884	61154184	61154195	12	ATTCACAGCTTCCTCATGGA	10_+_20224	NM_009120	+	'3'UTR'	61154150	61156045	609	290	583	224	591	0.191389	0.265082	0.246616	0.208955	0.196541
10	61156017	61156063	8612	46	61156043	6395	8220	0.954482	61156037	61156044	8	AACTTGCCTCTCTCCTTTTT	10_+_20224	NM_009120	+	'PA'	61156035	61156055	2531	779	1707	828	2375	0.795412	0.712066	0.722081	0.772388	0.789824
10	21719672	21719725	6659	53	21719698	2827	6330	0.950593	21719697	21719707	11	ATTTGCATAAATTGTGTCAT	10_+_20393	NM_011361	+	'PA'	21719698	21719718	846	805	1868	1002	1809	1	1	1	1	1
10	50708944	50708970	23	26	50708958	13	22	0.956522	50708951	50708960	10	TGTTTGTGTCTGAGTTATTC	10_+_20464	NM_011376	+	'PA'	50708948	50708968	7	5	3	2	5	1	1	1	1	1
10	76513151	76513191	258	40	76513169	124	247	0.957364	76513169	76513176	8	ACCTTGGGCTTTTCTGTTGT	10_+_20509	NM_001199271	+	'PA'	76513167	76513187	66	46	56	21	58	1	1	1	1	1
10	78277490	78277533	778	43	78277510	586	742	0.953728	78277508	78277515	8	ATCCAACGTGTGTTCATCAC	10_+_20513	NM_009200	+	'3'UTR'	78277361	78277570	125	52	218	62	285	1	1	1	1	1
10	77079873	77079912	125	39	77079889	82	123	0.984	77079888	77079903	16	AGCTTGGGTTCCGCATTGTG	10_+_20610	NM_019929	+	'3'UTR'	77079004	77081076	33	10	32	15	33	0.0559322	0.0342466	0.0571429	0.0635593	0.0527157
10	77080140	77080196	2151	56	77080161	667	2087	0.970246	77080160	77080174	15	ATTCTGTCTCTTGGCCTATG	10_+_20610	NM_019929	+	'3'UTR'	77079004	77081076	537	265	506	215	564	0.910169	0.907534	0.903571	0.911017	0.900958
10	80256549	80256573	26	24	80256562	21	26	1	80256561	80256562	2	ACTCCTGACTCCGTCCCGGT	10_+_208266	NM_199322	+	'3'UTR'	80256260	80257092	2	4	7	9	4	0.0350877	0.0634921	0.0744681	0.25	0.0740741
10	80258188	80258220	268	32	80258205	226	258	0.962687	80258202	80258206	5	AGCCAGTTCTCAGTGCCAGT	10_+_208266	NM_199322	+	'extend_3'TUR'	80257093	80262092	53	56	79	25	45	0.929825	0.888889	0.840426	0.694444	0.833333
10	127729880	127729923	1445	43	127729905	501	1387	0.959862	127729899	127729906	8	AAAGATACTGTGAGAGTGTG	10_+_20847	NM_019963	+	'PA'	127729895	127729915	246	38	323	148	632	1	1	1	1	1
10	127097984	127098057	1307	73	127098009	437	1294	0.990054	127098001	127098038	38	AAAATAAATAATCTACTGTA	10_+_20852	NM_009284	+	'3'UTR'	127097038	127098043	313	171	302	162	346	0.934328	0.909574	0.880466	0.947368	0.915344
10	79593401	79593445	1197	44	79593422	682	1151	0.961571	79593421	79593431	11	AAGCTGCCACCTGGGCTGTT	10_+_20869	NM_011492	+	'extend_3'TUR'	79593216	79598215	377	134	231	100	309	0.586314	0.582609	0.515625	0.561798	0.572222
10	79593195	79593233	921	38	79593214	799	888	0.964169	79593213	79593217	5	AGCTATGGCTATGAGGGTGT	10_+_20869	NM_011492	+	'PA'	79593205	79593225	266	96	217	78	231	0.413686	0.417391	0.484375	0.438202	0.427778
10	45431946	45431984	225	38	45431963	148	216	0.96	45431963	45431973	11	AATTATTTGCATCTTTCTGT	10_+_209462	NM_172473	+	'3'UTR'	45431343	45432151	55	40	42	20	59	0.639535	0.597015	0.792453	0.571429	0.75641
10	45432055	45432091	107	36	45432077	42	103	0.962617	45432068	45432079	12	ATATTTCTTTATTTGATCTA	10_+_209462	NM_172473	+	'3'UTR'	45431343	45432151	31	27	11	15	19	0.360465	0.402985	0.207547	0.428571	0.24359
10	127132206	127132239	53	33	127132220	33	51	0.962264	127132219	127132227	9	AAAATAAGTGAGTTTGACTA	10_+_210035	NM_173732	+	'PA'	127132212	127132232	12	18	8	4	9	0.315789	0.486486	0.444444	0.571429	0.428571
10	127138089	127138144	73	55	127138104	39	70	0.958904	127138099	127138123	25	ATAGTAGTCTTTTTAAATTA	10_+_210035	NM_001113211	+	'PA'	127138093	127138113	26	19	10	3	12	0.684211	0.513514	0.555556	0.428571	0.571429
10	80797899	80797947	286	48	80797916	125	272	0.951049	80797915	80797933	19	AGATTCTGGAGCACTCCCCT	10_+_21390	NM_009325	+	'PA'	80797909	80797929	97	33	58	14	70	1	1	1	1	1
10	52831408	52831442	204	34	52831428	84	199	0.97549	52831423	52831429	7	ACTGCCGCCTCTCTCGTGTG	10_+_215085	NM_178675	+	'PA'	52831418	52831438	65	61	18	24	31	1	1	1	1	1
10	3227458	3227498	479	40	3227479	229	463	0.966597	3227474	3227482	9	ATTTGGGATTTTATGAATTT	10_+_215748	NM_172546	+	'PA'	3227469	3227489	100	28	98	60	177	1	1	1	1	1
10	18253670	18253710	391	40	18253687	251	375	0.959079	18253686	18253695	10	AATATTTGAAACTTCTTTGT	10_+_215819	NM_001163592	+	'PA'	18253687	18253707	145	48	68	18	96	1	1	1	1	1
10	59326849	59326893	903	44	59326868	357	864	0.956811	59326867	59326878	12	AAATACCCGCAAGAGCTCTG	10_+_216001	NM_001291443	+	'3'UTR'	59326085	59326882	180	80	240	122	242	0.861244	0.909091	0.860215	0.835616	0.889706
10	61045521	61045553	218	32	61045538	174	214	0.981651	61045538	61045540	3	ATCCGCTGGTGCTTGGTGTC	10_+_216011	NM_153542	+	'extend_3'TUR'	61044977	61049976	74	19	31	25	65	0.101648	0.0552326	0.0496	0.0877193	0.0796569
10	61034362	61034403	2681	41	61034385	2320	2584	0.963819	61034383	61034386	4	TTAAAAAAAAAAAAGGACTG	10_+_216011	NM_153542	+	'intron'	61010964	61042877	654	325	594	260	751	0.898352	0.944767	0.9504	0.912281	0.920343
10	78047206	78047261	918	55	78047243	345	883	0.961874	78047224	78047247	24	AGAATCTGTGTATACTGGTT	10_+_216136	NM_173751	+	'PA'	78047237	78047257	348	75	179	69	212	0.977528	0.949367	0.972826	0.985714	0.986047
10	79150815	79150879	2422	64	79150840	1598	2301	0.950041	79150839	79150846	8	AGCAGGACCCGTGTGGGCCT	10_+_216150	NM_177613	+	'3'UTR'	79150805	79151143	533	273	659	267	569	0.527723	0.56639	0.586821	0.597315	0.591476
10	79151117	79151168	1788	51	79151141	800	1723	0.963647	79151138	79151143	6	AAGCTGAGAGAATCACCTAG	10_+_216150	NM_177613	+	'PA'	79151133	79151153	477	209	464	180	393	0.472277	0.43361	0.413179	0.402685	0.408524
10	79430400	79430456	1127	56	79430434	796	1116	0.99024	79430416	79430442	27	AAATTGTGCGCCTTGGTTGT	10_+_216156	NM_175450	+	'3'UTR'	79430345	79431991	311	147	288	114	256	0.787342	0.84	0.815864	0.850746	0.820513
10	79431974	79432007	264	33	79431991	182	253	0.958333	79431990	79431994	5	AGTCATCTTGCTGGCTTTTT	10_+_216156	NM_175450	+	'PA'	79431981	79432001	84	28	65	20	56	0.212658	0.16	0.184136	0.149254	0.179487
10	81615268	81615313	21	45	81615286	13	20	0.952381	81615281	81615306	26	AAAATGATATTAATACTGCC	10_+_216177	NM_001163064	+	'3'UTR'	81614757	81615810	3	5	4	1	7	0.130435	0.384615	0.173913	0.1	0.259259
10	81616257	81616283	37	26	81616271	29	36	0.972973	81616271	81616272	2	AGGTGTGAGTATATGGAGCT	10_+_216177	NM_001163064	+	'extend_3'TUR'	81615811	81620810	7	0	13	4	12	0.304348	0	0.565217	0.4	0.444444
10	81615797	81615823	41	26	81615810	26	40	0.97561	81615810	81615814	5	AAGAAGTTTCTGTTTCTCCA	10_+_216177	NM_001163064	+	'PA'	81615800	81615820	13	8	6	5	8	0.565217	0.615385	0.26087	0.5	0.296296
10	84077080	84077116	376	36	84077098	279	365	0.970745	84077096	84077099	4	AAGACATGGTAATCTTTTCA	10_+_216198	NM_146008	+	'PA'	84077090	84077110	108	19	51	41	146	1	1	1	1	1
10	95507731	95507781	222	50	95507764	113	213	0.959459	95507753	95507770	18	AAGAAGTAATGAACTTACTG	10_+_216238	NM_001001932	+	'3'UTR'	95504839	95508152	41	28	58	31	55	0.232955	0.202899	0.222222	0.224638	0.244444
10	95508021	95508052	70	31	95508036	48	68	0.971429	95508034	95508043	10	AAGACAGCATTTAAATCTGT	10_+_216238	NM_001001932	+	'3'UTR'	95504839	95508152	11	15	24	10	8	0.0625	0.108696	0.091954	0.0724638	0.0355556
10	95489246	95489274	55	28	95489260	43	55	1	95489260	95489263	4	AAGAAAGAAGAAGAAAATGT	10_+_216238	NM_001001932	+	'exon'	95489191	95489521	22	3	12	3	15	0.125	0.0217391	0.045977	0.0217391	0.0666667
10	95508124	95508168	504	44	95508144	241	486	0.964286	95508141	95508151	11	AGATGTTATCCAATGACTAT	10_+_216238	NM_001001932	+	'PA'	95508142	95508162	83	69	134	75	125	0.471591	0.5	0.51341	0.543478	0.555556
10	100035776	100035818	68	42	100035804	33	65	0.955882	100035798	100035806	9	AAGCAGTCTCTGTGTTATAG	10_+_216274	NM_146009	+	'3'UTR'	100035742	100036289	15	8	16	7	19	0.180723	0.181818	0.340426	0.269231	0.333333
10	99962824	99962855	88	31	99962840	72	86	0.977273	99962839	99962840	2	AAAGAAATGGAAAAAAATAC	10_+_216274	NM_146009	+	'exon'	99962781	99962904	41	11	14	5	15	0.493976	0.25	0.297872	0.192308	0.263158
10	100036268	100036303	111	35	100036283	49	106	0.954955	100036283	100036291	9	AAAAGCACAGTCATAATTGT	10_+_216274	NM_146009	+	'PA'	100036279	100036299	27	25	17	14	23	0.325301	0.568182	0.361702	0.538462	0.403509
10	114838763	114838797	110	34	114838783	92	105	0.954545	114838778	114838783	6	AAAAGAGAAGAAGAAATCAG	10_+_216345	NM_001033261	+	'exon'	114838665	114838888	51	9	12	10	23	0.213389	0.0865385	0.0816327	0.151515	0.0871212
10	114869806	114869844	690	38	114869827	363	676	0.97971	114869824	114869831	8	AGTTAATAGTGGGACTGTTT	10_+_216345	NM_001033261	+	'PA'	114869817	114869837	178	86	121	55	236	0.74477	0.826923	0.823129	0.833333	0.893939
10	110945674	110945730	2503	56	110945700	1144	2389	0.954455	110945694	110945706	13	AGTTTCTAAAGGTCTCTTTT	10_+_21664	NM_009344	+	'PA'	110945695	110945715	334	732	514	299	510	1	1	1	1	1
10	85812214	85812271	10630	57	85812250	7906	10202	0.959737	85812248	85812252	5	ATACCTGCTGTCTCTTGCCT	10_+_21859	NM_011595	+	'PA'	85812240	85812260	2427	1587	2419	1364	4360	0.938515	0.929701	0.940879	0.937457	0.955302
10	81053196	81053231	175	35	81053211	83	168	0.96	81053211	81053218	8	AACTTGCTTTCTTTCTGTGT	10_+_21886	NM_001252401	+	'PA'	81053208	81053228	43	11	20	27	67	1	1	1	1	1
10	93658412	93658444	223	32	93658429	161	216	0.96861	93658427	93658431	5	AATTGCGTTCTCTTCCTGTT	10_+_22025	NM_011629	+	'3'UTR'	93658097	93659959	57	26	68	17	48	0.483051	0.490566	0.475524	0.293103	0.305732
10	93659941	93659975	329	34	93659958	263	313	0.951368	93659958	93659961	4	AAATTTCTGTATCCTGTCAA	10_+_22025	NM_011629	+	'PA'	93659949	93659969	61	27	75	41	109	0.516949	0.509434	0.524476	0.706897	0.694268
10	34004668	34004710	1977	42	34004691	1281	1907	0.964593	34004688	34004694	7	AGATGGCTTTTTTTTTTTTT	10_+_22110	NM_009433	+	'PA'	34004681	34004701	729	156	377	181	464	0.983806	0.968944	0.984334	0.978378	0.989339
10	23625127	23625163	390	36	23625146	202	373	0.95641	23625144	23625150	7	TCCAGTCTTTGGCTCTCTGT	10_+_22361	NM_011704	+	'PA'	23625139	23625159	182	6	45	36	104	1	1	1	1	1
10	12851480	12851515	589	35	12851498	436	570	0.967742	12851497	12851502	6	AATCTTTCTGTCTTTTCATT	10_+_22634	NM_009538	+	'PA'	12851491	12851511	110	65	166	60	169	1	1	1	1	1
10	58603154	58603182	45	28	58603168	20	44	0.977778	58603167	58603174	8	ATAATGAATGTTACGTGTAT	10_+_237353	NM_172788	+	'extend_3'TUR'	58601665	58606664	7	7	12	6	12	0.0686275	0.170732	0.15	0.125	0.0805369
10	58601643	58601678	392	35	58601661	256	376	0.959184	58601659	58601663	5	AGAGGCTGTGTGTCTCAATA	10_+_237353	NM_172788	+	'PA'	58601654	58601674	95	34	68	42	137	0.931373	0.829268	0.85	0.875	0.919463
10	84479169	84479207	585	38	84479191	318	557	0.952137	84479186	84479193	8	AGCCATCTGTGTGTGTGTTT	10_+_237422	NM_001013441	+	'3'UTR'	84477933	84481082	195	65	91	31	175	1	1	1	1	1
10	110730362	110730412	72	50	110730377	33	69	0.958333	110730373	110730398	26	AAAACTAGGAGATAAATGTA	10_+_237542	NM_001003717	+	'3'UTR'	110730281	110734303	24	11	16	10	8	0.0718563	0.0666667	0.0645161	0.0694444	0.0247678
10	110732197	110732236	74	39	110732212	63	71	0.959459	110732208	110732215	8	AAATGCTTTTCTGATGCTTT	10_+_237542	NM_001003717	+	'3'UTR'	110730281	110734303	19	10	21	8	13	0.0568862	0.0606061	0.0846774	0.0555556	0.0402477
10	110730263	110730294	116	31	110730278	57	111	0.956897	110730278	110730281	4	AGAAGTTCTCAACATTGAAT	10_+_237542	NM_175489	+	'exon'	110730148	110734303	21	20	30	11	29	0.0628743	0.121212	0.120968	0.0763889	0.0897833
10	110734283	110734320	975	37	110734303	737	943	0.967179	110734300	110734304	5	AATCTGTGATCCAGTGACTC	10_+_237542	NM_001003717	+	'PA'	110734293	110734313	267	122	173	113	268	0.799401	0.739394	0.697581	0.784722	0.829721
10	79780988	79781011	20	23	79781001	13	20	1	79780997	79781002	6	ATCTGTAGCTTCATCTTTAT	10_+_23805	NM_011789	+	'PA'	79780991	79781011	10	0	4	0	6	1	0	1	0	1
10	45089495	45089526	77	31	45089512	38	77	1	45089507	45089517	11	AATTGACTTTTTTTATGGCA	10_+_23828	NM_024285	+	'PA'	45089504	45089524	23	15	20	11	8	1	1	1	1	1
10	75077918	75077943	22	25	75077930	15	22	1	75077930	75077935	6	AACTGATTTGGTGGTTCTAA	10_+_23887	NM_011820	+	'3'UTR'	75077628	75079713	5	2	0	0	15	1	1	0	0	1
10	7482840	7482876	252	36	7482861	194	240	0.952381	7482856	7482861	6	ACGGAGTGCTATATTTTTTT	10_+_23924	NM_011835	+	'3'UTR'	7482787	7482948	71	36	48	25	60	0.224684	0.196721	0.178439	0.192308	0.185759
10	7482926	7482970	1029	44	7482947	472	981	0.953353	7482944	7482949	6	TCTTTGTTTCAATTTAGCAC	10_+_23924	NM_011835	+	'PA'	7482938	7482958	245	147	221	105	263	0.775316	0.803279	0.821561	0.807692	0.814241
10	80586576	80586660	4136	84	80586627	1339	3987	0.963975	80586594	80586628	35	AGCTGCGGCTGTGCTCCTGC	10_+_26396	NM_023138	+	'3'UTR'	80586476	80587442	1340	389	852	388	1018	0.896321	0.917453	0.918103	0.930456	0.931382
10	80587048	80587102	285	54	80587082	115	276	0.968421	80587074	80587090	17	ACAAGTCTGGGGAGTGTCTG	10_+_26396	NM_023138	+	'3'UTR'	80586476	80587442	107	26	57	22	64	0.0715719	0.0613208	0.0614224	0.0527578	0.0585544
10	19862098	19862125	31	27	19862113	20	31	1	19862107	19862115	9	ACAAAGTCCCGAGAATTCTT	10_+_26408	NM_008580	+	'3'UTR'	19861387	19862556	7	4	7	1	12	1	1	1	1	1
10	10934082	10934120	28	38	10934098	17	28	1	10934091	10934116	26	ATCATTGTACTGAATTCATT	10_+_268281	NM_001077707	+	'3'UTR'	10933343	10935071	10	3	10	2	3	0.0724638	0.0405405	0.125	0.05	0.0247934
10	10937374	10937404	45	30	10937391	30	43	0.955556	10937383	10937392	10	AATTTTGTGTTCTTTTTTTT	10_+_268281	NM_001077707	+	'extend_3'TUR'	10935072	10940071	5	10	11	6	11	0.0362319	0.135135	0.1375	0.15	0.0909091
10	10935046	10935084	397	38	10935069	199	382	0.962217	10935062	10935069	8	AAATTATGGATTGTTTTATT	10_+_268281	NM_001077707	+	'PA'	10935061	10935081	123	61	59	32	107	0.891304	0.824324	0.7375	0.8	0.884298
10	41185303	41185342	69	39	41185323	20	66	0.956522	41185315	41185332	18	TCCAAAGTATGAAACTGGAT	10_+_268294	NM_001277229	+	'3'UTR'	41184849	41185388	14	3	12	6	31	0.233333	0.103448	0.2	0.26087	0.348315
10	41171971	41172001	75	30	41171988	40	74	0.986667	41171984	41171991	8	AGGTCTCGTTGTCACCTCAC	10_+_268294	NM_001277229	+	'intron'	41171875	41174833	17	8	18	8	23	0.283333	0.275862	0.3	0.347826	0.258427
10	41185363	41185399	123	36	41185379	45	121	0.98374	41185377	41185385	9	ACACTGATACTTGATCTTTA	10_+_268294	NM_001277229	+	'PA'	41185378	41185398	29	18	30	9	35	0.483333	0.62069	0.5	0.391304	0.393258
10	58689162	58689194	196	32	58689179	156	187	0.954082	58689176	58689181	6	AAAGTGCTGAGTGTCTGTGG	10_+_268301	NM_172939	+	'PA'	58689171	58689191	55	33	32	16	51	1	1	1	1	1
10	121189897	121189934	356	37	121189916	155	339	0.952247	121189914	121189922	9	ATATATACATGTATATATGG	10_+_270802	NM_173022	+	'PA'	121189905	121189925	91	49	52	41	106	1	1	1	1	1
10	79478297	79478331	277	34	79478315	151	269	0.971119	79478313	79478319	7	AATGAGGCCACGGCTGAGTT	10_+_27403	NM_013850	+	'PA'	79478307	79478327	68	16	53	26	106	1	1	1	1	1
10	82829247	82829293	104	46	82829274	54	99	0.951923	82829266	82829286	21	AGGAATGCCTCCAGTTCTAG	10_+_28109	NM_026579	+	'3'UTR'	82828668	82831580	15	15	35	11	23	0.141509	0.157895	0.224359	0.180328	0.185484
10	82831562	82831600	432	38	82831580	252	423	0.979167	82831578	82831588	11	TTTAAAGTATTTGGTGGCAC	10_+_28109	NM_026579	+	'PA'	82831570	82831590	87	77	117	49	93	0.820755	0.810526	0.75	0.803279	0.75
10	62871522	62871549	31	27	62871535	25	31	1	62871535	62871542	8	AAATTTCATAGAGTGAAATA	10_+_30045	NM_013888	+	'3'UTR'	62871032	62871588	7	6	6	2	10	0.0795455	0.176471	0.193548	0.1	0.175439
10	62871555	62871605	208	50	62871574	124	199	0.956731	62871566	62871583	18	ATTTATGCATTTAGGATGCA	10_+_30045	NM_013888	+	'3'UTR'	62871032	62871588	81	28	25	18	47	0.920455	0.823529	0.806452	0.9	0.824561
10	83059110	83059146	216	36	83059128	151	206	0.953704	83059126	83059132	7	AGCAAGTTTGTTATCTCACT	10_+_319277	NM_001033375	+	'3'UTR'	83056984	83059218	42	37	49	35	43	0.0495283	0.112805	0.0978044	0.107034	0.0562092
10	83054496	83054532	289	36	83054515	187	286	0.989619	83054512	83054520	9	AAAAGAAAGAGAAGGAAGGT	10_+_319277	NM_001033375	+	'exon'	83054434	83054533	156	27	36	28	39	0.183962	0.0823171	0.0718563	0.0856269	0.0509804
10	83059196	83059260	2359	64	83059216	1295	2277	0.96524	83059216	83059231	16	AATTTCAAAACTGTCCTTCC	10_+_319277	NM_001033375	+	'PA'	83059208	83059228	650	264	416	264	683	0.766509	0.804878	0.830339	0.807339	0.89281
10	94053673	94053715	788	42	94053699	326	749	0.950508	94053692	94053701	10	TACATTTGTCAGAGCCCATC	10_+_319880	NM_001168684	+	'PA'	94053689	94053709	170	140	207	66	166	1	1	1	1	1
10	45571807	45571836	32	29	45571819	10	31	0.96875	45571819	45571829	11	AGCCTGTATTTGATTGGTTA	10_+_320363	NR_040624	+	'PA'	45571814	45571834	14	5	0	2	10	1	1	0	1	1
10	125452270	125452310	479	40	125452290	217	458	0.956159	125452285	125452292	8	AGTACTGAAGTTTTTTCAAT	10_+_320398	NM_177152	+	'3'UTR'	125451977	125452415	75	54	112	68	149	0.925926	0.931034	0.965517	1	0.943038
10	7384116	7384167	39	51	7384152	20	39	1	7384125	7384160	36	AGACCGTCCGTTTTTTTCCT	10_+_320642	NR_030698	+	'exon'	7383169	7384421	15	4	5	1	14	1	1	1	1	1
10	62436913	62436942	66	29	62436929	45	64	0.969697	62436926	62436932	7	AAACTTCACTGAGTCATTTT	10_+_327762	NM_177372	+	'PA'	62436926	62436946	13	20	11	11	9	1	1	1	1	1
10	68245387	68245414	28	27	68245402	13	27	0.964286	68245396	68245403	8	TCCCCGTGCCTATTTTATTC	10_+_327766	NM_177794	+	'PA'	68245392	68245412	8	4	3	3	9	1	1	1	1	1
10	105012978	105013011	45	33	105012996	18	43	0.955556	105012990	105013000	11	AGATTTGAGTATCAACTCAG	10_+_327812	NR_038032	+	'intron'	105012744	105017458	11	4	10	8	10	0.5	0.666667	0.714286	0.533333	0.384615
10	105020907	105020940	42	33	105020928	29	40	0.952381	105020924	105020931	8	AACTATGTGTACGTATGTAT	10_+_327812	NR_038032	+	'PA'	105020916	105020936	11	2	4	7	16	0.5	0.333333	0.285714	0.466667	0.615385
10	43235192	43235234	496	42	43235212	337	473	0.953629	43235210	43235221	12	AAAAACTGGTCTCTTTAACG	10_+_331623	NM_199028	+	'3'UTR'	43231897	43235223	57	131	137	56	92	1	1	1	1	1
10	17565456	17565480	24	24	17565469	19	24	1	17565469	17565470	2	AAGTTTTCTAGTAGGTTTTT	10_+_378431	NM_138628	+	'PA'	17565459	17565479	0	2	6	5	11	0	1	1	1	1
10	5979442	5979482	497	40	5979466	203	478	0.961771	5979459	5979467	9	CATGTGATCGTTTTCTTGCT	10_+_381990	NM_001033466	+	'PA'	5979457	5979477	96	82	174	40	86	1	1	1	1	1
10	126954187	126954225	84	38	126954208	51	81	0.964286	126954202	126954208	7	AATTTGCTGCGCCTGCTAAT	10_+_407790	NM_001098789	+	'PA'	126954200	126954220	1	2	4	10	64	1	1	1	1	1
10	81527887	81527912	26	25	81527901	16	25	0.961538	81527899	81527903	5	ATCCCTGTGTGTTCATTCTT	10_+_408062	NM_001024626	+	'extend_3'TUR'	81524332	81529331	14	8	1	1	1	0.666667	0.727273	0.0714286	0.142857	0.0454545
10	81524314	81524350	51	36	81524328	26	50	0.980392	81524327	81524342	16	ACAGTTTTATCTATATTATC	10_+_408062	NM_001024626	+	'PA'	81524321	81524341	7	3	13	6	21	0.333333	0.272727	0.928571	0.857143	0.954545
10	87909478	87909514	342	36	87909495	201	328	0.959064	87909495	87909499	5	ATCCATCTTTGTCAAATAGT	10_+_432486	NM_001004164	+	'3'UTR'	87908586	87910074	100	50	72	23	83	0.357143	0.409836	0.444444	0.403509	0.389671
10	87910039	87910086	489	47	87910066	365	481	0.98364	87910065	87910074	10	AAACTTTGAGTTTATTGTTA	10_+_432486	NM_001004164	+	'PA'	87910064	87910084	171	66	88	31	125	0.610714	0.540984	0.54321	0.54386	0.586854
10	80544947	80544980	253	33	80544964	198	244	0.964427	80544962	80544967	6	ACCCTGCCTGGTCCTCTCTC	10_+_50492	NM_022653	+	'3'UTR'	80544765	80545105	60	41	61	21	61	1	1	1	1	1
10	52156553	52156616	386	63	52156571	246	373	0.966321	52156570	52156604	35	AGTTCATATTCCTCATAATT	10_+_52014	NM_030250	+	'3'UTR'	52156474	52159998	99	60	96	39	79	0.0589988	0.0618557	0.0733945	0.0577778	0.0586924
10	52157789	52157843	4351	54	52157813	3418	4188	0.962537	52157807	52157816	10	AATTTTGGTCCAGTCACATT	10_+_52014	NM_030250	+	'3'UTR'	52156474	52159998	1242	731	852	468	895	0.740167	0.753608	0.651376	0.693333	0.664933
10	52158962	52159030	1334	68	52159011	412	1302	0.976012	52159004	52159016	13	ACTGTAGTAGTATGTGAATG	10_+_52014	NM_030250	+	'3'UTR'	52156474	52159998	309	160	343	157	333	0.184148	0.164948	0.262232	0.232593	0.2474
10	29065244	29065279	91	35	29065260	46	88	0.967033	29065256	29065269	14	AAAGACTCATGAAGCATCCT	10_+_52665	NM_001110195	+	'3'UTR'	29064556	29066467	25	10	18	11	24	0.15625	0.147059	0.113924	0.135802	0.148148
10	29065445	29065477	56	32	29065458	24	54	0.964286	29065458	29065467	10	AAAATAATCACCTTTTTGTT	10_+_52665	NM_001110195	+	'3'UTR'	29064556	29066467	17	1	16	5	15	0.10625	0.0147059	0.101266	0.0617284	0.0925926
10	29065724	29065776	483	52	29065754	199	459	0.950311	29065746	29065761	16	AAATCTCACGACCTATGGAT	10_+_52665	NM_001110195	+	'3'UTR'	29064556	29066467	111	53	112	64	119	0.69375	0.779412	0.708861	0.790123	0.734568
10	110224411	110224466	153	55	110224428	111	146	0.954248	110224425	110224434	10	ACGTGTATGTTATATTACTT	10_+_52679	NM_178609	+	'3'UTR'	110221895	110224440	14	61	31	17	23	1	1	1	1	1
10	72131890	72131949	2769	59	72131913	2036	2671	0.964608	72131912	72131919	8	TTTGTTGTTGATGTTGTTGT	10_+_52696	NM_025635	+	'3'UTR'	72120135	72132537	806	512	576	261	516	0.847529	0.857621	0.83965	0.818182	0.86
10	72132510	72132556	191	46	72132538	124	183	0.958115	72132537	72132544	8	AAACTTACGTGTTTAGTTGC	10_+_52696	NM_025635	+	'PA'	72132527	72132547	42	30	52	25	34	0.044164	0.0502513	0.0758017	0.0783699	0.0566667
10	111421974	111422006	41	32	111421995	20	39	0.95122	111421984	111421996	13	AAATCCAATGTTTGTTGCCA	10_+_52705	NM_178610	+	'3'UTR'	111421738	111425486	3	11	10	6	9	0.0220588	0.1	0.0480769	0.0652174	0.0456853
10	111423130	111423209	664	79	111423149	176	659	0.99247	111423145	111423196	52	AATGCAATTAAAGTATTTCT	10_+_52705	NM_178610	+	'3'UTR'	111421738	111425486	122	95	187	77	178	0.897059	0.863636	0.899038	0.836957	0.903553
10	111425475	111425502	47	27	111425490	37	45	0.957447	111425485	111425491	7	AATGCTCTTGTAGTGTTTTA	10_+_52705	NM_178610	+	'PA'	111425476	111425496	11	4	11	9	10	0.0808824	0.0363636	0.0528846	0.0978261	0.0507614
10	105284314	105284380	750	66	105284334	442	717	0.956	105284330	105284337	8	AAGTGGATTGTTAAATTATT	10_+_52713	NM_025602	+	'3'UTR'	105284235	105284566	134	121	187	91	184	0.409786	0.456604	0.458333	0.408072	0.434988
10	105284461	105284497	376	36	105284482	130	363	0.965426	105284475	105284482	8	TCTGAGCTCACAGTGAGATA	10_+_52713	NM_025602	+	'3'UTR'	105284235	105284566	57	65	87	64	90	0.174312	0.245283	0.213235	0.286996	0.212766
10	105284869	105284905	454	36	105284887	375	432	0.951542	105284886	105284888	3	AATGGAGTGTAATAGAAGCG	10_+_52713	NM_025602	+	'extend_3'TUR'	105284567	105289566	106	61	103	46	116	0.324159	0.230189	0.252451	0.206278	0.274232
10	20800215	20800250	288	35	20800234	220	275	0.954861	20800231	20800237	7	AGCTCCTGGTTTCTTTCTTT	10_+_52906	NM_001177776	+	'PA'	20800225	20800245	77	33	59	27	79	1	1	1	1	1
10	23908072	23908115	899	43	23908090	515	869	0.96663	23908089	23908095	7	TCCTGATGTGTATGTATATA	10_+_53331	NM_016797	+	'3'UTR'	23907527	23908765	328	110	155	89	187	0.510903	0.472103	0.359629	0.410138	0.433875
10	23908738	23908783	1130	45	23908765	869	1085	0.960177	23908753	23908766	14	AATTCTGAGTCCCAAGAACT	10_+_53331	NM_016797	+	'PA'	23908755	23908775	314	123	276	128	244	0.489097	0.527897	0.640371	0.589862	0.566125
10	41250825	41250872	8617	47	41250847	6513	8301	0.963328	41250846	41250850	5	ATCAAAAGTGTCATATTTTG	10_+_53599	NM_016898	+	'PA'	41250838	41250858	2011	981	1983	946	2380	0.920788	0.938756	0.94249	0.947896	0.939968
10	110933838	110933876	767	38	110933859	599	747	0.973924	110933858	110933861	4	ATTTTGAGTTTTTCTGTTGT	10_+_53605	NM_015781	+	'3'UTR'	110933132	110933942	145	161	193	87	161	0.0538833	0.058996	0.0572361	0.0523151	0.0601419
10	110928069	110928124	801	55	110928100	577	763	0.952559	110928098	110928107	10	AAAAAGGATGAAGAAAAAGA	10_+_53605	NM_015781	+	'exon'	110928065	110928193	381	132	115	51	84	0.141583	0.0483694	0.0341044	0.0306675	0.0313784
10	110933907	110933961	9091	54	110933939	4129	8679	0.95468	110933932	110933944	13	ATGGGATGCTGTCTCGGTTT	10_+_53605	NM_015781	+	'PA'	110933932	110933952	1430	1953	2360	1183	1753	0.531401	0.715647	0.699881	0.711365	0.654838
10	110935181	110935223	1807	42	110935200	972	1728	0.956281	110935200	110935207	8	AAAATACACTGGTGATATTT	10_+_53605	NM_001146707	+	'PA'	110935196	110935216	453	294	368	195	418	0.168339	0.107732	0.109134	0.117258	0.156145
10	121889781	121889833	51	52	121889814	32	49	0.960784	121889790	121889823	34	AAAACCCAGTGTTGCTGTCA	10_+_54140	NM_016847	+	'3'UTR'	121889417	121890509	0	6	11	11	21	0	0.136364	0.0407407	0.0956522	0.0612245
10	121890456	121890534	720	78	121890475	293	686	0.952778	121890473	121890517	45	TGAAGAGTTATTTTTAAAAA	10_+_54140	NM_016847	+	'3'UTR'	121889417	121890509	23	33	241	93	296	0.92	0.75	0.892593	0.808696	0.862974
10	121893854	121893883	42	29	121893867	21	41	0.97619	121893867	121893874	8	AAATGAGGCTTGTGGTATTA	10_+_54140	NM_016847	+	'extend_3'TUR'	121890510	121895509	2	4	14	9	12	0.08	0.0909091	0.0518519	0.0782609	0.0349854
10	42255101	42255195	5628	94	42255175	4639	5405	0.960377	42255174	42255177	4	ATTCCTGTGTGCTCTGGTTG	10_+_54198	NM_017472	+	'PA'	42255165	42255185	1373	665	1153	604	1610	0.969633	0.956835	0.933603	0.942278	0.960621
10	75978581	75978619	1154	38	75978601	677	1103	0.955806	75978598	75978604	7	AGAGCCGCCTTAGTTTTATG	10_+_54387	NM_019434	+	'PA'	75978592	75978612	328	110	282	116	267	1	1	1	1	1
10	127514025	127514079	5093	54	127514049	2226	4869	0.956018	127514045	127514055	11	CTTGGCTGTCCTTTTAAGTG	10_+_56351	NM_019766	+	'3'UTR'	127513143	127514310	1170	904	1131	587	1077	0.785235	0.826325	0.785962	0.820979	0.801936
10	127514289	127514340	1176	51	127514311	728	1125	0.956633	127514308	127514326	19	ACATTTTCACTCCTGAATTA	10_+_56351	NM_019766	+	'PA'	127514300	127514320	294	186	271	119	255	0.197315	0.170018	0.188325	0.166434	0.189873
10	21088667	21088715	2243	48	21088689	1107	2183	0.97325	21088689	21088700	12	AATGTATTGCAAAAATGTGT	10_+_56422	NM_019702	+	'PA'	21088685	21088705	753	202	468	214	546	0.959236	0.878261	0.939759	0.930435	0.931741
10	127764204	127764261	5744	57	127764237	3242	5490	0.95578	127764235	127764242	8	AAAGTACAAACTGTGTTGTC	10_+_56530	NM_019953	+	'PA'	127764233	127764253	1493	648	1100	512	1737	0.980302	0.987805	0.985663	0.990329	0.989744
10	4513650	4513677	41	27	4513665	26	41	1	4513662	4513668	7	ACCAGAAATTGAGTTCCTGA	10_+_56533	NM_019958	+	'3'UTR'	4513589	4520877	15	11	3	4	8	0.25	0.207547	0.214286	0.210526	0.216216
10	4520731	4520767	93	36	4520747	34	90	0.967742	4520743	4520757	15	ATCCTTAGACAAGTTATTGT	10_+_56533	NM_019958	+	'3'UTR'	4513589	4520877	33	22	5	11	19	0.55	0.415094	0.357143	0.578947	0.513514
10	4520860	4520888	53	28	4520875	43	52	0.981132	4520874	4520876	3	AAATTGCTGGTGTCTTAAAA	10_+_56533	NM_019958	+	'PA'	4520867	4520887	12	20	6	4	10	0.2	0.377358	0.428571	0.210526	0.27027
10	59360956	59360987	128	31	59360972	71	122	0.953125	59360970	59360974	5	CAAAGGTCTCCAGGCTTATG	10_+_56709	NM_019965	+	'extend_3'TUR'	59360765	59365764	34	11	32	14	31	0.155963	0.0990991	0.15534	0.111111	0.140271
10	59362003	59362063	656	60	59362043	424	628	0.957317	59362021	59362050	30	ATTGGCAGTGGTGGGTCTGC	10_+_56709	NM_019965	+	'extend_3'TUR'	59360765	59365764	155	78	153	89	153	0.711009	0.702703	0.742718	0.706349	0.692308
10	59360724	59360778	104	54	59360763	78	99	0.951923	59360743	59360765	23	ATTCAGGGATTCAATTAAGA	10_+_56709	NM_019965	+	'PA'	59360754	59360774	16	21	16	19	27	0.0733945	0.189189	0.0776699	0.150794	0.122172
10	57531607	57531648	674	41	57531626	387	653	0.968843	57531625	57531635	11	ATGCCATGGAGTTCTGTTTG	10_+_57319	NM_020561	+	'PA'	57531626	57531646	201	51	103	52	246	1	1	1	1	1
10	93209935	93209963	77	28	93209950	63	75	0.974026	93209948	93209950	3	AACTTTGTCTCCTGGCCAAT	10_+_57764	NM_021320	+	'extend_3'TUR'	93208718	93213717	10	24	14	17	10	0.5	0.685714	0.608696	0.73913	0.263158
10	93107856	93107909	65	53	93107872	38	64	0.984615	93107868	93107900	33	AGCTTTGTCATAAATTATTC	10_+_57764	NM_021320	+	'intron'	93107746	93145162	10	11	9	6	28	0.5	0.314286	0.391304	0.26087	0.736842
10	128237863	128237898	519	35	128237882	273	497	0.957611	128237880	128237884	5	ACCTCCTTGTTTCAGAGTCA	10_+_58223	NM_001164197	+	'PA'	128237870	128237890	119	20	84	58	216	0.952	1	0.923077	0.935484	0.896266
10	82654831	82654881	55	50	82654863	35	53	0.963636	82654839	82654866	28	ATTTATAGTTATTTAAACGT	10_+_58250	NM_021439	+	'3'UTR'	82654545	82658636	9	14	9	10	11	1	1	1	1	1
10	24021679	24021721	25	42	24021704	7	24	0.96	24021684	24021710	27	AAGTGGAAAGCAAAGAGTCT	10_+_59012	NM_021509	+	'3'UTR'	24021436	24022589	10	1	4	0	9	0.0763359	0.0322581	0.0588235	0	0.108434
10	24022279	24022313	55	34	24022295	34	53	0.963636	24022290	24022304	15	AAAACTGCCACCAACTGAAG	10_+_59012	NM_021509	+	'3'UTR'	24021436	24022589	22	0	6	4	21	0.167939	0	0.0882353	0.210526	0.253012
10	24022429	24022468	29	39	24022449	8	28	0.965517	24022439	24022460	22	ATTCATGAGAGAATCAAGTT	10_+_59012	NM_021509	+	'3'UTR'	24021436	24022589	13	1	5	2	7	0.0992366	0.0322581	0.0735294	0.105263	0.0843373
10	24022495	24022522	25	27	24022508	21	24	0.96	24022506	24022510	5	ATTTTTCCACTTTAAGCCCT	10_+_59012	NM_021509	+	'3'UTR'	24021436	24022589	8	3	10	1	2	0.0610687	0.0967742	0.147059	0.0526316	0.0240964
10	24022564	24022604	212	40	24022589	130	203	0.957547	24022582	24022590	9	ACTTCTTGATTCAAAGAATT	10_+_59012	NM_021509	+	'PA'	24022579	24022599	78	26	43	12	44	0.59542	0.83871	0.632353	0.631579	0.53012
10	79621086	79621143	1846	57	79621112	1327	1785	0.966956	79621109	79621113	5	ACCTCTTGCCCCTGGCTGTT	10_+_59090	NM_021565	+	'PA'	79621102	79621122	537	244	361	192	451	1	1	1	1	1
10	79519158	79519210	8596	52	79519184	4340	8329	0.968939	79519182	79519184	3	CTGCTGTGTGTCTTTGGGTC	10_+_625249	NM_001037741	+	'PA'	79519174	79519194	2405	749	2089	884	2481	1	1	1	1	1
10	5229426	5229455	62	29	5229441	56	62	1	5229441	5229446	6	AAAAGAAAAGGAGGTAGAGA	10_+_64009.2	NM_001079686	+	'exon'	5229419	5229574	40	4	10	1	7	1	1	1	1	1
10	18576857	18576904	1176	47	18576876	708	1141	0.970238	18576876	18576884	9	AAATCCTGTGTCTGCTTTGT	10_+_64058	NM_022032	+	'PA'	18576868	18576888	681	141	51	46	222	0.956461	0.986014	1	0.938776	0.961039
10	75505546	75505579	266	33	75505563	185	255	0.958647	75505562	75505565	4	AAACCTTTTCTGTCTTTTTT	10_+_64453	NM_177475	+	'3'UTR'	75502639	75505714	66	40	65	39	45	0.709677	0.597015	0.670103	0.722222	0.725806
10	75505693	75505733	124	40	75505708	68	118	0.951613	75505708	75505717	10	AATTTCATTTTTAAATCTTA	10_+_64453	NM_177475	+	'PA'	75505704	75505724	27	27	32	15	17	0.290323	0.402985	0.329897	0.277778	0.274194
10	79608534	79608589	8450	55	79608556	6443	8092	0.957633	79608555	79608559	5	AACTGAGTGTTCTGTTTCTA	10_+_66043	NM_025313	+	'PA'	79608553	79608573	2443	870	1900	865	2014	1	1	1	1	1
10	128314647	128314702	5575	55	128314681	1627	5457	0.978834	128314665	128314681	17	AAAATGTGTTTTATTAGGTG	10_+_66118	NM_025364	+	'3'UTR'	128314431	128314694	935	999	1470	725	1328	0.935	0.987154	0.98	0.983718	0.975037
10	12728947	12729008	2561	61	12728988	2130	2445	0.954705	12728987	12728991	5	ATTCTTTGGTATGGATTGCT	10_+_66125	NM_175102	+	'PA'	12728979	12728999	652	279	575	258	681	1	1	1	1	1
10	119668684	119668739	3786	55	119668715	2357	3643	0.962229	119668714	119668719	6	AAAGAATGTTATGCTGAAGT	10_+_66225	NM_025431	+	'3'UTR'	119668429	119669126	865	537	904	439	898	0.926124	0.902521	0.894164	0.867589	0.902513
10	119669108	119669142	385	34	119669126	309	377	0.979221	119669125	119669128	4	AGATCTTGGAGTTTGACATT	10_+_66225	NM_025431	+	'PA'	119669116	119669136	59	55	106	63	94	0.0631692	0.092437	0.104847	0.124506	0.0944724
10	86153758	86153809	54	51	86153784	16	53	0.981481	86153769	86153799	31	AAAGAAATGACTTCAAAACT	10_+_66263	NR_015572	+	'extend_3'TUR'	86152700	86157699	9	11	12	11	10	0.409091	0.458333	0.444444	0.6875	0.434783
10	86152688	86152716	60	28	86152703	52	59	0.983333	86152703	86152707	5	ACTTATGTGTATGAGTGTAT	10_+_66263	NR_015572	+	'PA'	86152689	86152709	13	13	15	5	13	0.590909	0.541667	0.555556	0.3125	0.565217
10	53327846	53327882	463	36	53327864	401	444	0.958963	53327863	53327865	3	ACTTTTTTCTCTAATGTGTT	10_+_66403	NM_025541	+	'3'UTR'	53327684	53329021	106	101	97	45	95	0.646341	0.737226	0.642384	0.56962	0.678571
10	53327912	53327989	234	77	53327928	123	227	0.970085	53327927	53327976	50	ATTTTCTTCTCTTTTATATG	10_+_66403	NM_025541	+	'3'UTR'	53327684	53329021	58	36	54	34	45	0.353659	0.262774	0.357616	0.43038	0.321429
10	93683673	93683714	2755	41	93683693	1605	2660	0.965517	93683692	93683697	6	AGCAGTGTCTTGTGCGTTCA	10_+_66414	NM_025551	+	'PA'	93683683	93683703	556	282	834	316	672	0.992857	0.982578	0.991677	0.984424	0.982456
10	52040065	52040094	66	29	52040082	26	65	0.984848	52040076	52040083	8	AAGTTTGCGGTGTTTGTTTT	10_+_66686	NM_025705	+	'3'UTR'	52039803	52041183	31	13	12	4	5	0.326316	0.236364	0.235294	0.166667	0.1
10	52024870	52024894	20	24	52024882	10	20	1	52024882	52024884	3	TGCGAGTTTCAACGGCATTT	10_+_66686	NM_025705	+	'intron'	52024527	52031205	4	1	2	3	10	0.0421053	0.0181818	0.0392157	0.125	0.2
10	52041164	52041197	196	33	52041181	76	190	0.969388	52041179	52041184	6	AGAGCCCCTGACTTCTATTT	10_+_66686	NM_025705	+	'PA'	52041173	52041193	60	41	37	17	35	0.631579	0.745455	0.72549	0.708333	0.7
10	13282790	13282870	156	80	13282820	56	149	0.955128	13282820	13282861	42	AAAAATGTCTGGCAATGTAA	10_+_66757	NM_025748	+	'3'UTR'	13282665	13283182	38	19	31	25	36	0.633333	0.575758	0.574074	0.78125	0.553846
10	13287057	13287095	100	38	13287080	64	95	0.95	13287071	13287084	14	AAAACTAAGTACTTTCATTC	10_+_66757	NM_025748	+	'extend_3'TUR'	13283183	13288182	22	14	23	7	29	0.366667	0.424242	0.425926	0.21875	0.446154
10	13235267	13235384	842	117	13235349	266	802	0.952494	13235284	13235368	85	AAAGACTTCCCTCATATTCA	10_+_66848	NM_025799	+	'3'UTR'	13234654	13237081	155	49	209	105	284	0.659574	0.590361	0.694352	0.677419	0.677804
10	13235406	13235454	372	48	13235432	141	354	0.951613	13235421	13235433	13	AATTATTTTATAATATTTTA	10_+_66848	NM_025799	+	'3'UTR'	13234654	13237081	69	32	86	48	119	0.293617	0.385542	0.285714	0.309677	0.28401
10	4547328	4547397	438	69	4547348	153	418	0.954338	4547346	4547381	36	AATTTTGTTTAGTTAAAATA	10_+_67141	NM_025995	+	'3'UTR'	4546971	4547383	25	205	93	57	38	1	1	1	1	1
10	87708731	87708813	2313	82	87708752	1545	2205	0.953307	87708750	87708792	43	AATATGGTTTGTTGACCAAA	10_+_67282	NM_001122960	+	'3'UTR'	87708586	87708903	574	198	500	261	672	0.961474	0.980198	0.961538	0.981203	0.976744
10	62521546	62521574	46	28	62521560	28	44	0.956522	62521559	62521563	5	AGCTTTGAATTTGGTGAAAT	10_+_67307	NM_026085	+	'PA'	62521550	62521570	23	1	6	1	13	1	1	1	1	1
10	74998169	74998233	2836	64	74998208	1248	2708	0.954866	74998189	74998217	29	GTTTGTGTGAGGCTTTTTTG	10_+_67332	NM_026095	+	'extend_3'TUR'	74998186	75003185	694	465	647	341	561	0.985795	0.997854	0.98628	0.979885	0.980769
10	62729875	62729922	9266	47	62729902	6105	8811	0.950896	62729900	62729903	4	TTTAAAAAAAAAAGATTTTG	10_+_67345	NM_030114	+	'intron'	62726934	62732375	4118	2403	4228	1552	3933	0.930832	0.941246	0.949899	0.92823	0.93844
10	7542341	7542378	943	37	7542360	679	905	0.959703	7542358	7542363	6	ATATCAGCTTACTTTTTTCT	10_+_67418	NM_026141	+	'PA'	7542351	7542371	233	126	200	111	235	0.96281	0.976744	0.934579	0.973684	0.963115
10	90560272	90560349	625	77	90560295	281	594	0.9504	90560287	90560316	30	ATATTTACATCATTATTTTA	10_+_67454	NM_026166	+	'3'UTR'	90559363	90561403	220	63	128	54	129	0.139152	0.12426	0.1	0.0901503	0.0958395
10	90561381	90561421	2022	40	90561402	1296	1945	0.961919	90561398	90561405	8	ATATAGAGAGTACTGTCCAT	10_+_67454	NM_026166	+	'PA'	90561393	90561413	541	188	516	244	456	0.342188	0.370809	0.403125	0.407346	0.338782
10	90565324	90565376	2734	52	90565357	1268	2660	0.972933	90565352	90565358	7	ATTTTGCTCCATAATATTTT	10_+_67454	NM_027078	+	'PA'	90565348	90565368	769	252	607	293	739	0.486401	0.497041	0.474219	0.489149	0.549034
10	127875763	127875829	87	66	127875790	23	83	0.954023	127875783	127875814	32	AAAGAAATTTGTTTTCCCTA	10_+_67588	NM_001164237	+	'3'UTR'	127875491	127878497	18	7	28	11	19	0.0983607	0.145833	0.225806	0.196429	0.140741
10	127876443	127876502	264	59	127876474	171	253	0.958333	127876467	127876483	17	AAAACCTTTCTTATGCCCTT	10_+_67588	NM_001164237	+	'3'UTR'	127875491	127878497	92	26	46	25	64	0.502732	0.541667	0.370968	0.446429	0.474074
10	127878461	127878509	218	48	127878494	100	210	0.963303	127878473	127878496	24	ACATTCTTGTCTCTCTGAGT	10_+_67588	NM_001164237	+	'PA'	127878487	127878507	73	15	50	20	52	0.398907	0.3125	0.403226	0.357143	0.385185
10	98730098	98730138	1644	40	98730118	812	1612	0.980535	98730117	98730122	6	ATTGAGCGTGTTTTTATTTT	10_+_67603	NM_026268	+	'PA'	98730113	98730133	317	361	386	188	360	1	1	1	1	1
10	77447530	77447567	106	37	77447545	53	102	0.962264	77447545	77447551	7	AGCTGGAAGGTCTGGGACAG	10_+_67884	NM_026431	+	'3'UTR'	77447293	77448183	24	19	16	11	32	0.220183	0.527778	0.271186	0.44	0.438356
10	77448162	77448197	202	35	77448182	74	200	0.990099	77448179	77448183	5	GTCTGTGTCCCAGGCCCACT	10_+_67884	NM_026431	+	'PA'	77448173	77448193	85	17	43	14	41	0.779817	0.472222	0.728814	0.56	0.561644
10	61136887	61136933	2637	46	61136913	1847	2539	0.962837	61136911	61136916	6	AAACTTGGCTTAGGATAGTT	10_+_67895	NM_026438	+	'PA'	61136903	61136923	686	518	671	281	383	0.994203	0.994242	0.98243	0.989437	0.977041
10	82205150	82205185	184	35	82205166	103	177	0.961957	82205166	82205174	9	AAACAGTTACAGGTGGTATT	10_+_67933	NM_001081218	+	'extend_3'TUR'	82204138	82209137	43	9	31	8	86	0.136943	0.09	0.162304	0.121212	0.319703
10	82202193	82202237	630	44	82202219	308	600	0.952381	82202211	82202223	13	AAAATTAGTATATGGATTCT	10_+_67933	NM_001081218	+	'intron'	82202011	82204025	211	68	126	43	152	0.671975	0.68	0.659686	0.651515	0.565056
10	82204119	82204154	169	35	82204135	122	163	0.964497	82204134	82204138	5	AAGAATTGCCCAAATTGTAT	10_+_67933	NM_001081218	+	'PA'	82204127	82204147	60	23	34	15	31	0.191083	0.23	0.17801	0.227273	0.115242
10	98486689	98486730	1132	41	98486713	666	1099	0.970848	98486708	98486714	7	AAACCTTTAGTCTTTTTTTT	10_+_67972	NM_026482	+	'3'UTR'	98485754	98488777	225	209	275	138	252	0.208526	0.410609	0.412294	0.393162	0.347586
10	98486929	98486986	378	57	98486946	148	362	0.957672	98486942	98486972	31	AAATACACAGCAATGGTTCT	10_+_67972	NM_026482	+	'3'UTR'	98485754	98488777	116	48	84	32	82	0.107507	0.0943026	0.125937	0.0911681	0.113103
10	98453790	98453843	959	53	98453827	577	927	0.966632	98453815	98453827	13	AAAAGAAAAGTAGGTGTGGC	10_+_67972	NM_026482	+	'exon'	98453696	98453836	547	88	87	64	141	0.506951	0.172888	0.130435	0.182336	0.194483
10	98488753	98488792	846	39	98488775	465	813	0.960993	98488769	98488776	8	AATGGGGACTGAACTTTTTG	10_+_67972	NM_026482	+	'PA'	98488767	98488787	134	154	199	110	216	0.124189	0.302554	0.298351	0.31339	0.297931
10	127926631	127926664	236	33	127926649	163	232	0.983051	127926645	127926652	8	AGCTTTGTGTTTGTGTTTAA	10_+_68094	NM_001114097	+	'3'UTR'	127926029	127927230	59	31	52	23	67	0.393333	0.413333	0.385185	0.403509	0.368132
10	127927627	127927656	79	29	127927643	54	76	0.962025	127927641	127927644	4	AAAAGGCGTTCGGTACTTGG	10_+_68094	NM_001114097	+	'extend_3'TUR'	127927231	127932230	20	14	18	4	20	0.133333	0.186667	0.133333	0.0701754	0.10989
10	127927207	127927244	283	37	127927223	108	270	0.954064	127927223	127927230	8	AGTTCCATCTTGTGGGTGCC	10_+_68094	NM_001114097	+	'PA'	127927220	127927240	67	27	60	28	88	0.446667	0.36	0.444444	0.491228	0.483516
10	79706628	79706665	322	37	79706645	272	314	0.975155	79706644	79706646	3	ATATGTGTCATAGTCATTGC	10_+_68114	NM_023431	+	'3'UTR'	79706389	79707889	41	40	96	46	91	0.759259	0.909091	0.989691	0.958333	1
10	79706755	79706784	21	29	79706766	7	20	0.952381	79706766	79706777	12	ATTGACATGTTGCCCTGGCA	10_+_68114	NM_023431	+	'3'UTR'	79706389	79707889	13	4	1	2	0	0.240741	0.0909091	0.0103093	0.0416667	0
10	119661929	119661989	3201	60	119661966	1678	3100	0.968447	119661947	119661972	26	AATGGCATTCTGTGTTCTTC	10_+_68212	NM_026617	+	'extend_3'TUR'	119661954	119666953	1008	282	497	303	1010	1	1	1	1	1
10	59489074	59489122	40	48	59489110	24	38	0.95	59489083	59489112	30	ATAGTGAGCTCTTTCCTTAA	10_+_69090	NM_001199187	+	'intron'	59476523	59504868	12	1	13	1	11	0.155844	0.05	0.149425	0.0909091	0.130952
10	59562716	59562750	252	34	59562734	174	241	0.956349	59562732	59562735	4	GCTGTGCTGTGGTCTGTGCA	10_+_69090	NM_001199187	+	'PA'	59562728	59562748	65	19	74	10	73	0.844156	0.95	0.850575	0.909091	0.869048
10	69670133	69670165	164	32	69670151	52	160	0.97561	69670147	69670152	6	TTGTGTGGTGGGTGGTGCAT	10_+_69563	NR_038041	+	'intron'	69667508	69679699	37	25	42	13	43	1	1	1	1	1
10	126718842	126718879	1097	37	126718861	571	1045	0.952598	126718861	126718862	2	GAGTCTCTGCTGTGTTCCTG	10_+_69654	NM_001190454	+	'3'UTR'	126718544	126719015	293	91	234	90	337	0.309398	0.355469	0.378029	0.32491	0.382955
10	126718977	126719028	1978	51	126719008	1114	1886	0.953488	126719006	126719012	7	AACCAGAGTTTCAAAATATT	10_+_69654	NM_001190454	+	'PA'	126719005	126719025	638	161	376	184	527	0.673706	0.628906	0.607431	0.66426	0.598864
10	31047967	31048024	392	57	31048009	97	373	0.951531	31047981	31048010	30	AGACTCTGTCTTCTGTTTTG	10_+_69692	NM_027168	+	'extend_3'TUR'	31047893	31052892	113	52	64	36	108	1	1	1	1	1
10	70846849	70846919	168	70	70846901	54	166	0.988095	70846862	70846908	47	AATATGGATGGAAGTTGCAT	10_+_69718	NM_027184	+	'3'UTR'	70844567	70848633	66	16	27	14	43	0.532258	0.380952	0.3375	0.482759	0.505882
10	70840152	70840179	21	27	70840164	12	21	1	70840162	70840171	10	AAATTGTATGTAAAGCTGCT	10_+_69718	NM_027184	+	'intron'	70839535	70843952	7	1	1	3	9	0.0564516	0.0238095	0.0125	0.103448	0.105882
10	70848614	70848651	157	37	70848631	83	152	0.968153	70848629	70848637	9	AACGTCTTCCGTTGATTAGC	10_+_69718	NM_027184	+	'PA'	70848623	70848643	40	22	49	12	29	0.322581	0.52381	0.6125	0.413793	0.341176
10	87641115	87641153	271	38	87641133	128	260	0.95941	87641128	87641139	12	AAAAATATGTTCCTATTGTG	10_+_69736	NM_028334	+	'PA'	87641130	87641150	35	63	66	30	66	1	1	1	1	1
10	85511050	85511091	279	41	85511073	108	275	0.985663	85511067	85511080	14	AGACTTGACTTTTTTTAAGG	10_+_69754	NM_153195	+	'PA'	85511063	85511083	98	16	68	23	70	1	1	1	1	1
10	79637843	79637897	407	54	79637864	230	389	0.955774	79637859	79637864	6	ATCTGAGACCTCCCCCTTGA	10_+_69770	NM_027207	+	'PA'	79637854	79637874	82	56	108	31	112	1	1	1	1	1
10	83225017	83225053	298	36	83225036	222	286	0.959732	83225032	83225039	8	AATATATTGCCTCTTGTCTT	10_+_69784	NM_001145198	+	'3'UTR'	83222343	83225507	105	44	41	24	72	0.724138	0.846154	0.759259	0.75	0.648649
10	83225489	83225520	113	31	83225506	66	108	0.955752	83225502	83225506	5	ACCTGGATTTCTTAATTATT	10_+_69784	NM_001145198	+	'PA'	83225497	83225517	40	8	13	8	39	0.275862	0.153846	0.240741	0.25	0.351351
10	7398658	7398695	355	37	7398675	228	339	0.95493	7398675	7398682	8	AGTGCCCAATGTTGGCTTGC	10_+_69912	NM_145706	+	'PA'	7398674	7398694	62	85	86	35	71	1	1	1	1	1
10	61812584	61812623	30	39	61812606	9	29	0.966667	61812592	61812616	25	CCTGTGCCCCAAACTGTGGC	10_+_70162	NR_038038	+	'PA'	61812604	61812624	8	3	3	3	12	1	1	1	1	1
10	57768229	57768271	48	42	57768244	30	46	0.958333	57768242	57768262	21	AAAAATTACTTTGATTACAA	10_+_70297	NM_027375	+	'3'UTR'	57766913	57768340	13	5	9	7	12	0.180556	0.166667	0.104651	0.127273	0.107143
10	57768322	57768360	315	38	57768339	194	309	0.980952	57768337	57768347	11	ATATTGCATTTTCATGACTA	10_+_70297	NM_027375	+	'PA'	57768330	57768350	59	25	77	48	100	0.819444	0.833333	0.895349	0.872727	0.892857
10	80788966	80789001	555	35	80788984	461	531	0.956757	80788983	80788985	3	AAACTGGCTTCTGATCTGAG	10_+_70312	NM_027381	+	'3'UTR'	80788700	80788996	139	72	145	51	124	1	1	1	1	1
10	79799172	79799196	23	24	79799185	19	22	0.956522	79799183	79799185	3	ACGAGTGTGTCCGCTAAGCT	10_+_70335	NM_001204931	+	'PA'	79799176	79799196	2	0	6	6	8	1	0	1	1	1
10	84188953	84188984	52	31	84188969	30	51	0.980769	84188964	84188971	8	ATATCTGGTTTGTTTATGTT	10_+_70428	NM_027423	+	'3'UTR'	84188526	84189923	9	5	15	10	12	0.0708661	0.208333	0.148515	0.294118	0.0967742
10	84189900	84189937	337	37	84189922	193	327	0.970326	84189914	84189923	10	ACTCAGTCTGAGAGGTGATG	10_+_70428	NM_027423	+	'PA'	84189913	84189933	109	18	76	24	100	0.858268	0.75	0.752475	0.705882	0.806452
10	62476681	62476746	494	65	62476701	329	477	0.965587	62476695	62476711	17	AAGATCTAAGAAATTAACAC	10_+_70432	NM_027425	+	'3'UTR'	62474482	62481490	154	55	107	42	119	1	1	1	1	1
10	117121977	117122010	27	33	117121990	10	26	0.962963	117121989	117122002	14	AAGGATCTGAGTAATTTTGT	10_+_70574	NM_027468	+	'3'UTR'	117120577	117124408	6	4	10	0	6	0.4	0.307692	0.5	0	0.5
10	117124392	117124418	37	26	117124406	30	36	0.972973	117124402	117124406	5	AATGTTGTCTCTTTCCACTA	10_+_70574	NM_027468	+	'PA'	117124398	117124418	9	9	10	2	6	0.6	0.692308	0.5	1	0.5
10	81110334	81110366	86	32	81110352	62	84	0.976744	81110348	81110357	10	AAACCAAGTCGCAAGAGTTG	10_+_70615	NM_027480	+	'PA'	81110347	81110367	33	7	5	7	32	1	1	1	1	1
10	116397848	116397873	25	25	116397861	15	25	1	116397857	116397864	8	AAGACTTGCCTTGGTCATGG	10_+_71086	NR_038026	+	'intron'	116392714	116399085	6	4	5	3	7	0.125	0.173913	0.113636	0.272727	0.170732
10	116400320	116400353	148	33	116400337	86	142	0.959459	116400335	116400341	7	AATCCTTGCTGTCTGCTCAT	10_+_71086	NR_038026	+	'PA'	116400325	116400345	42	19	39	8	34	0.875	0.826087	0.886364	0.727273	0.829268
10	61201381	61201414	177	33	61201398	129	169	0.954802	61201395	61201402	8	AAAGACGCTGGAGCTTTTAT	10_+_71361	NM_001284300	+	'PA'	61201390	61201410	46	16	25	20	62	0.901961	0.842105	0.833333	0.8	0.96875
10	61201993	61202018	21	25	61202008	14	20	0.952381	61202003	61202008	6	ACGCCGATCCTCCTCCTTCG	10_+_71361	NM_178058	+	'PA'	61201998	61202018	5	3	5	5	2	0.0980392	0.157895	0.166667	0.2	0.03125
[truncated: 16,640 more rows]

## Sheet: Column_description
chrom:	Name of the chromosome.
chromStart:	The starting position of the feature in the chromosome. The first base in a chromosome is numbered o.
chromEnd:	The ending postion of the feature in the chromosome or scaffold. The chromEnd base is not included in the display of the feature. For example, the first 100 bases of a chromosome are defined as chromStart=0, chromEnd =100, and span the bases numbered 0-99.
#raw_peak_tags:	The number of tags in the raw peak.
raw_peak_length:	The length of the raw peak.
mode_location:	The loci with the largest tags in the peak.
#mode_tags:	The number of tags of the mode.
#new_peak_tags:	The number of tags of the new peak.
#new_peak_tags/raw_peak_tags:	The percent of the number of tags of the raw peak in the new peak.
new_peak_start:	The starting postiotion of the new peak.The first base in a chromosome is numbered 1.
new_peak_end:	The ending position of the new peak. The first base in a chromosome is numbered 1.
new_peak_length:	The length of the new peak.
downstream_20bases_of_mode:	The 20 nucleotides downstream the mode.
Enterz_ID:	The chromosome, strand and Entrez ID of the gene where the pA located.
Refseq_ID:	RefseqID of of the gene where the pA located.
strand:	The srand of the gene where the pA located.
Detailed_gene_location:	Assignend each peak to the gene model(promoter,TSS, intron, exon,3'UTR,annotated 3'UTR(pA),extended_3'UTR, please see the detailed definition of gene model in the Methods part of the manuscripts)
Detailed_gene_location_start:	The starting position of the detailed_gene_location.The first base in a chromosome is numbered 1.
Detailed_gene_location_end:	The ending position of the detailed_gene_location.The first base in a chromosome is numbered 1.
#GO_tags:	The number of tags belonged to this peak for GO.
#PD6_tags:	The number of tags belonged to this peak for PD6.
#PD8_tags:	The number of tags belonged to this peak for PD8.
#PD10_tags:	The number of tags belonged to this peak for PD10.
[truncated: 6 more rows]
