# Supplementary material for: 3′ UTR lengthening as a novel mechanism in regulating cellular senescence
Source: Genome Res. 2018 Mar;28(3):285–94. doi: 10.1101/gr.224451.117 (PMC5848608; doi:10.1101/gr.224451.117)
Supplement: Supplemental Material [file supp_gr.224451.117_Supplemental_Table_S7.xlsx]

## Sheet: 3165_APA_genes
entrez_ID	Refseq_ID	gene_symbol	G0_RUD	P3_RUD	P4_RUD	P5_RUD	P6_RUD	G0_E3UTR	P3_E3UTR	P4_E3UTR	P5_E3UTR	P6_E3UTR	P3_TPM	P4_TPM	P5_TPM	P6_TPM	P3_fpkm	P4_fpkm	P5_fpkm	P6_fpkm
11_-_71675	NM_027860	0610010F05Rik	0.132064	0.324689	0.293843	0.57687	4.78856	1675.1	1673.1	1670.8	1663.16	1672.66	23.4375	18.5422	14.9215	14.6893	16.7466	14.8305	8.79283	5.44803
4_+_74098	NM_028754	0610037L13Rik	0.0666609	0.132456	0.100732	0.0843132	0.112597	265.303	262.931	256.365	228.416	244.667	38.8393	38.8747	39.0052	37.6271	23.0497	21.8289	27.7262	29.9654
7_+_56372	NM_019772	1110004F10Rik	2.33857	4.01844	2.94891	2.42019	2.57814	671.64	616.449	643.188	629.556	661.048	87.5	87.8517	77.7487	71.1864	88.1911	83.5124	76.6154	65.4658
4_+_66185	NM_001081183	1110037F02Rik	0.375563	0.817104	1.41742	1.01165	0.320326	422.5	365.645	448.444	504.075	393.696	41.5179	42.3274	45.288	49.3785	23.5213	19.197	10.6171	9.06447
9_-_66202	NM_025419	1110059G10Rik	0.107291	0.0507843	0.130216	0.100232	0.518572	333.184	337.023	331.52	331.273	334.225	19.1964	12.7877	17.2775	10.0565	5.18132	7.02224	8.52033	8.97417
4_-_68920	NM_001142727	1110065P20Rik	0.0373149	0.0453749	0.0838797	0.086311	0.0172455	432.187	500.143	444.933	497.135	435.365	20.3125	30.4348	27.2251	35.2542	11.0647	12.9711	23.1809	45.1044
9_-_68861	NM_001033145	1190002N15Rik	2.85708	0.289259	0.452488	0.962384	1.55788	2169.1	2217.29	2175.47	2247.39	2230.86	41.2946	54.2199	50.2618	55.2542	18.9673	27.4653	18.1976	25.082
10_-_544717	NM_001135569	1190007I07Rik	1.13295	Inf	2.83237	Inf	2.1526	162	159	169.309	157.895	165.067	5.35714	7.03325	9.94764	10.1695	2.31539	3.97201	4.36431	6.82893
11_+_66874	NM_025818	1200014J11Rik	0.116039	0.0406136	0.0671563	0.113718	1.18858	919.225	940.519	912.538	916.63	918.054	18.0804	15.2174	19.1099	16.8362	11.6352	9.02422	7.4539	8.2011
17_-_72016	NM_028056	1600002H07Rik	0.071364	0.0123515	0.296435	0	0.550523	581.115	578.392	650.853	644	667.419	11.3839	4.34783	8.37696	7.00565	6.76121	3.07323	3.31754	2.98946
17_+_67912	NM_001083882	1600012H06Rik	1.48071	0.710978	0.887437	1.07711	1.66601	1219.97	1158.23	1208.66	1304.78	1227.75	39.5089	40.4092	42.1466	56.1582	20.0769	24.0562	25.1865	20.7274
7_+_72244	NM_001085385	1600014C10Rik	1.31022	0.226599	0.342734	1.15139	0.686775	1636.85	1662.36	1663.06	1640.96	1506.67	10.4911	10.2302	11.7801	18.9831	9.78591	11.5371	19.4342	14.9488
9_-_74211	NM_028820	1700017B05Rik	0.564302	0.335894	0.473735	0.261251	0.923709	787.077	796.333	806.553	790.988	823.048	26.7857	36.0614	21.7277	21.3559	14.478	16.3327	8.04715	7.16128
10_-_67851	NM_026411	1700021F05Rik	0.129167	0.0923611	0.153676	0.221667	0.409231	52.575	61.7143	54.5123	57.0667	55.1034	43.75	36.445	35.3403	39.322	9.43673	9.46856	11.2383	30.8581
1_-_69399	NM_197990	1700025G04Rik	0.326816	0.228588	0.196991	0.463058	0.523995	1493.09	1464.5	1497.58	2195.61	2107.06	13.3929	13.6829	13.3508	10.1695	8.64998	8.19112	4.368	3.73983
8_-_69068	NM_026931	1810011O10Rik	0.112566	0.484267	0.196782	0.249676	0.168136	1134	1123.12	1097.37	1136.72	1130.89	1.78571	2.42967	8.37696	3.16384	2.27017	2.462	8.62136	4.64606
16_+_69053	NM_001081400	1810013L24Rik	0.598254	0.144035	0.137324	0.178483	0.365815	1850.88	1768.49	1862.15	1828.9	2005.75	46.6518	53.1969	54.9738	53.2203	39.3596	39.9952	28.8089	20.9111
9_+_69773	NM_178619	1810026J23Rik	1.94385	0.407334	0.463752	0.653769	1.15204	1986.84	2023.36	2032.1	2039.12	2031.31	20.9821	25.3197	20.1571	24.7458	54.4777	48.3356	36.1187	27.2239
10_+_67884	NM_026431	1810043G02Rik	0.279159	0.306152	0.226686	0.164557	0.64346	749.743	553.806	717.254	609.72	610.767	8.03571	7.54476	6.5445	8.24859	5.31644	5.36142	6.53454	10.1154
11_+_208501	NM_001110242	1810043H04Rik	0.0252401	0.0962544	0.0774411	0.17284	0.0567901	242.02	232.521	251.64	202.455	238.463	15.8482	19.1816	17.2775	18.5311	2.75877	2.79201	4.38187	7.01027
13_-_70153	NM_027335	2210016F16Rik	0	0.0371734	0.0365689	0.00943631	0.0302894	120.997	115.595	114.92	115.261	116.479	36.3839	43.3504	47.1204	43.8418	9.42156	10.7839	11.3559	11.1035
7_-_233545	NM_172280	2210018M11Rik	0.854614	0.817457	0.896313	2.30787	1.05943	1149.36	1262.65	1515.48	1279.23	1483.65	18.0804	14.9616	19.3717	18.7571	20.3849	12.1648	7.80788	9.74778
1_-_69549	NM_001081226	2310009B15Rik	0.215909	0.197917	0.527778	0	1.11765	86.5195	81	92.8056	87.1094	88.232	14.0625	13.8107	16.7539	20.452	5.69255	4.34307	5.79437	16.3533
8_-_69551	NM_175149	2310022B05Rik	4.39779	3.33027	2.70966	2.87293	3.80018	2000.66	1992.84	1948.52	2040.44	2067.92	108.929	93.4783	108.377	108.927	70.3027	75.6466	64.536	63.8066
11_+_67862	NM_024210	2310033P09Rik	0.0259569	0.03011	0.0737387	0.0122067	0.0334555	557.306	660.2	647.671	587.682	699.927	12.2768	9.33504	5.75916	9.26554	4.08983	3.75537	5.25638	7.27932
1_+_227446	NM_173187	2310035C23Rik	3.13417	2.14648	1.9068	3.51929	3.68374	1456.27	1422.75	1455.19	1379.69	1467.56	18.75	19.3095	24.8691	19.548	14.9001	16.6228	21.9023	12.917
7_-_68277	NM_026655	2310057M21Rik	0.17229	0.0964824	0.227806	0.509213	0.34458	400.526	436	442.138	408.911	473.882	17.1875	16.624	14.6597	10.5085	10.066	7.95186	6.89732	5.7733
3_+_66421	NM_025555	2410004B18Rik	0.181117	0.394162	0.713245	0.267243	0.258358	537.834	506.787	532.385	527.667	531.171	31.4732	31.5857	23.5602	23.7288	9.62846	11.832	14.5494	11.4303
17_-_224904	NM_153152	2410015M20Rik	0.0966234	0.0552134	0.0693168	0.0571429	0.182063	130.131	139.665	133.917	133.707	131.139	41.2946	55.3708	50	82.9379	75.8056	85.7023	89.5193	102.977
19_+_67383	NM_026120	2410127L17Rik	0.115564	0.181138	0.149439	0.20987	0.182762	686.545	652.962	687.848	718.633	745.162	58.4821	46.1637	36.3874	36.9492	27.8596	21.4767	17.1806	13.7428
5_+_76792	NM_001081236	2410131K14Rik	1.30802	1.33007	1.78919	1.36794	0.971045	3518.38	3026.82	3114.67	2607.76	3169.31	6.25	12.1483	5.49738	6.66667	4.60201	6.88838	4.55213	3.24252
10_-_72320	NM_028197	2510003E04Rik	0.195339	0.0254395	0.138663	0	0.349688	519.539	522.095	519.183	520.169	519.643	23.4375	24.4246	21.7277	27.2316	17.6829	18.8624	22.0986	22.1923
X_-_67028	NM_025921	2610002M06Rik	0.14587	0.476899	0.44949	0.217022	0.172795	2335.72	2126.34	2437.33	2034.96	2718.2	16.5179	18.9258	18.3246	21.1299	3.97907	4.45023	3.48712	3.41841
10_-_72128	NM_001004362	2610008E11Rik	6.69627	1.27081	1.75835	1.46559	3.81521	2057.95	2053.51	2055.68	2052.68	2055.47	31.4732	40.665	43.9791	52.4294	10.3559	12.7669	11.09	16.6164
7_-_70420	NM_027420	2610034B18Rik	1.208	0.649279	0.47789	0.705513	0.755863	914.092	909.23	905.511	931.353	900.148	13.6161	11.2532	13.3508	12.2034	15.5674	9.40164	13.9477	13.0122
11_+_72503	NM_001002004	2610507B11Rik	0.809509	0.125351	0.154713	0.0967082	0.511157	582.932	567.178	574.146	586.052	578.743	47.7679	37.5959	40.5759	47.1186	41.0135	30.3902	27.5742	21.2799
5_-_330173	NM_181075	2610524H06Rik	0.585635	0.524744	0.406831	0.737082	0.464088	253.34	241.817	264.787	271.611	272.373	15.8482	11.3811	14.1361	12.4294	13.961	9.52653	13.0214	20.3265
18_+_68046	NM_026529	2700062C07Rik	0	0	0	0	0	347.938	368.641	367.324	352.091	351.333	8.70536	9.46292	11.5183	8.13559	2.25842	2.23015	2.96561	2.68688
11_+_69944	NM_172403	2810021J22Rik	0	0	0	0	0	1904.67	1915	1909.25	1905.28	1913.91	2.45536	2.55754	4.71204	2.59887	1.61599	1.34996	1.4539	1.1244
3_+_74200	NM_028814	2810403A07Rik	0.481699	0.0655175	0.075364	0.310428	0.414635	1028.43	1033.39	1028.82	1029.43	1028.13	33.0357	27.7494	28.534	39.887	18.7575	12.0173	9.66804	13.5994
9_+_68026	NM_026515	2810417H13Rik	0.394696	1.03302	0.750459	0.8972	0.560861	1201.8	1535.83	1520.33	1566.21	1544.1	69.4196	31.0742	26.4398	8.13559	54.0274	21.7604	22.8587	8.38915
9_-_235345	NM_177702	4833427G06Rik	0.192941	0	0.0714597	0.142919	0.482353	204.164	257.286	224.966	215.667	247.523	4.6875	7.54476	12.5654	12.0904	1.03161	1.81536	1.50316	4.14596
10_-_68281	NM_175128	4930430F08Rik	0	0	0	0	0.466364	1237.04	1243.48	1250.98	1243.2	1243.32	9.82143	7.41688	11.7801	11.7514	6.25823	5.32472	8.00629	5.65388
14_-_74430	NM_028934	4930452B06Rik	0	0	1.14744	0	3.67179	348.8	404.1	372.5	381.278	374.381	2.23214	2.04604	4.71204	2.37288	2.43338	2.07481	2.33523	1.45147
16_-_67609	NM_026273	4930453N24Rik	0.0273544	0.129739	0.10744	0.0542366	0.0390069	421.363	491.214	517.076	578.067	460.16	71.875	57.4169	58.9005	51.5254	22.735	25.0134	25.705	20.9706
7_-_233103	NM_172741	4931406P16Rik	1.02386	0.492824	0.438687	0.820277	1.35297	2090.68	1987.67	2058.46	2053.37	2099.82	23.4375	26.2148	19.8953	21.0169	20.8482	18.7151	7.30928	5.53353
8_+_66756	NM_025747	4933411K20Rik	2.43088	0.128322	0	0.496669	1.00054	2861.6	2862.96	2855.99	2855.92	2861.52	10.4911	8.82353	9.68586	16.4972	11.5634	8.37434	5.30478	5.64929
11_-_70591	NM_027472	5730455P16Rik	1.72739	0.446351	0.9697	0.611276	2.40861	1369.48	1064.48	953.379	846.023	1583.9	11.6071	11.1253	11.5183	11.1864	7.8656	8.60232	4.64406	4.44699
4_+_230279	NM_144905	6330416G13Rik	0.798305	0.297485	0.477969	0.36743	0.508012	2142.11	1748.94	2010.56	1707.38	1985.02	3.79464	4.09207	4.18848	4.63277	1.9402	2.74481	2.79608	2.67405
18_-_212163	NM_178670	8030462N17Rik	0.239046	0.302337	0.277099	0.871625	0.737629	2934.5	3515.46	3067	3557.95	3296.27	11.6071	7.67263	9.94764	10.0565	11.6299	10.2963	6.34626	6.80538
6_+_74525	NM_028982	8430419L09Rik	1.57887	1.30597	1.54545	1.28064	4.09335	1970.1	1536.53	1658.61	2018.96	1863.6	4.24107	4.60358	6.5445	6.21469	5.54425	5.29837	4.98228	4.47471
12_+_217830	NM_145448	9030617O03Rik	0.177317	0.035581	0.0849381	0.014134	0.741886	894.201	890.4	885.905	890.473	893.942	13.3929	14.8338	23.822	29.2655	16.9136	15.4869	19.2039	17.9698
19_-_71617	NM_198296	9130011E15Rik	0.792168	0.747748	0.648183	0.411102	0.866171	1402.68	1365.8	1339.77	1167	1322.21	4.46429	3.83632	2.87958	4.85876	7.18922	7.14468	7.33754	6.78308
7_-_100043133	NM_177001	9130023H24Rik	0.964608	0.358703	0.536133	0.995802	4.4137	1918.11	1906.91	1915.88	1901.87	1915.99	7.58929	11.2532	8.11518	11.2994	1.98036	2.08979	1.43784	2.25471
9_-_234912	NM_199017	9230110C19Rik	0.249028	0.186883	0.177112	0.241313	0.274829	1182.12	1448.26	1173.92	1172.6	1166.77	4.24107	7.67263	5.2356	8.36158	4.12301	6.37991	5.84042	3.6695
6_-_319801	NM_177003	9630033F20Rik	2.90125	0.913937	1.05422	1.84955	1.46408	2684.59	2649.55	2636.15	2697.75	2688.27	20.9821	17.0077	18.5864	15.3672	1.85564	1.73378	1.24832	1.14991
19_-_240613	NM_172836	9930021J03Rik	0.435609	0.135657	0.341654	0.896843	0.832783	853.176	784.2	782	767.633	868.878	6.69643	10.4859	12.8272	11.0734	11.5083	8.61769	8.86329	7.22816
10_+_319277	NM_001033375	A230046K03Rik	1.08975	0.387807	0.198875	0.0838501	1.59295	2227.66	2222.18	2223.73	2222.7	2227.79	67.1875	59.4629	78.2723	82.0339	30.4045	25.7768	17.9604	12.9618
2_-_214239	NM_001001982	A430105I19Rik	4.11585	0.620143	0.835294	2.16592	3.579	2685.14	2884.84	2914.33	3030.47	2938.77	13.8393	9.59079	11.2565	13.3333	13.6037	7.24317	5.49232	4.90776
13_-_212281	NM_183146	A530054K11Rik	0.530636	0.765321	0.386051	0.635673	1.50981	2349.48	2433.58	2398.13	2292.18	2274.35	4.24107	7.92839	5.75916	7.79661	2.31881	3.2825	1.60966	1.05703
X_+_213438	NM_001122596	A630033H20Rik	17.8841	9.00809	9.28649	8.02241	8.07056	1512.33	1473.7	1483.95	1445.2	1451.66	13.6161	10.9974	6.5445	4.63277	26.4198	23.2885	15.0792	6.94679
17_+_224805	NM_198608	Aars2	0.205314	0.369565	0.869565	0.803403	0.923913	371.891	377.333	383.944	368.935	365.443	8.70536	9.07928	8.11518	7.9096	4.54335	4.47481	5.77705	4.53297
9_-_67618	NM_026276	Aasdhppt	0.403961	1.0567	0.618669	0.591163	0.566531	264.654	397	373.045	466.016	389.735	43.75	36.8286	33.7696	33.6723	10.215	9.25746	9.79098	7.15444
11_-_217265	NM_147219	Abca5	2.18539	0.966171	1.90167	2.89851	0.561299	1644.15	1506.08	1842.45	2408.35	1770.18	13.1696	6.26598	11.2565	5.53672	10.4569	4.58208	1.90071	1.31537
5_+_18669	NM_011075	Abcb1b	5.3413	1.11277	0	2.22554	16.3207	355.75	352.072	364	358.06	352.577	18.5268	7.03325	13.089	5.87571	6.61223	3.05925	3.42289	1.77634
X_-_11306	NM_009592	Abcb7	0.461603	1.5515	3.90226	0.564182	Inf	2771.19	3101.35	2678.87	3023.11	2489.48	10.2679	8.82353	9.42408	6.55367	6.43796	3.99826	2.65804	1.48628
16_+_17250	NM_008576	Abcc1	0.0337576	0.0259074	0.0262581	0.0332743	0.035309	1572.84	1472.61	1393.72	1549.21	1726.24	66.5179	35.8056	42.1466	40.339	52.4975	20.7407	13.8453	9.67321
3_-_19299	NM_008991	Abcd3	3.41101	5.22057	4.63102	8.00302	11.5339	1229.56	1237.43	1214	1230.9	1228.77	47.3214	42.4552	42.9319	49.4915	19.4961	19.4183	16.5894	148.548
16_+_27406	NM_013852	Abcf3	0.0292024	0.0843624	0.109295	0.0343855	0.0634521	562.541	566.174	572.672	565	654.22	15.4018	14.8338	12.0419	11.2994	18.7486	22.2224	19.4758	15.7544
17_+_11307	NM_009593	Abcg1	5.57102	0.705067	0.991811	0.641512	0.506457	1672.59	1457.48	1340.97	1497.48	1655.87	5.13393	3.96419	7.06806	7.11864	2.65667	1.58855	1.1712	1.52237
8_+_68904	NM_001081119	Abhd13	0.81324	0.657635	0.879024	1.18384	1.80682	1984.81	1808.04	2094.51	2196.79	2222.31	22.0982	25.5754	30.3665	18.1921	11.3689	9.4039	7.65134	4.97696
9_+_67469	NM_026179	Abhd5	0.439755	0.311777	0.361725	0.519081	0.356009	1253.96	924.906	1010.29	1009.41	1033.22	28.5714	46.5473	36.1257	40.678	16.6576	25.82	21.5503	21.5146
14_+_66082	NM_025341	Abhd6	0.0997243	0.0911981	0.0617341	0.121263	0.213695	756.558	803.263	656.415	672.765	765.52	4.24107	5.24297	4.45026	5.64972	4.54945	3.94405	2.71291	2.43901
2_-_11308	NM_001077193	Abi1	0.999613	1.22087	1.28453	1.14371	0.912234	1067.9	1218.8	1190.91	1230.57	1149.08	113.839	113.427	119.372	102.712	39.5955	40.9484	29.3774	28.0508
1_+_11352	NM_009595	Abl2	0.437835	0.0813007	0.089713	0.543831	5.96186	6861.13	6864.13	6859.29	6861.65	6864.26	29.6875	34.2711	34.8168	21.0169	18.9858	20.7798	21.4786	12.2767
19_-_226251	NM_001290816	Ablim1	1.44252	0.435357	0.604038	0.908731	1.77507	3718	3544.63	3805.35	3903.62	3806.88	8.48214	24.2967	16.7539	21.6949	5.36172	13.5721	5.15283	4.53004
9_-_66948	NM_025862	Acad8	0.544774	0.792963	0.799369	0.637329	1.8069	717.87	689.58	672.711	625.652	717.561	18.0804	15.4731	17.2775	23.1638	11.1353	9.31867	12.2088	10.8579
3_+_229211	NM_172678	Acad9	0.187816	0.172755	0.250649	0.145431	0.166888	693.873	604.176	602.61	628.863	650.782	27.9018	20.9719	24.8691	20.226	24.2926	18.4692	22.6486	19.6696
1_-_11363	NM_007381	Acadl	0.348547	0.263313	0.235569	0.380704	0.472235	274.574	339.32	342.21	353.145	320.191	73.8839	80.9463	90.3141	87.6836	35.3826	46.7651	58.5648	58.2832
4_+_140500	NM_207223	Acap3	0.422294	0.558554	0.462459	0.662829	0.30259	1061.79	1024.04	1096.58	995.4	948.435	10.7143	8.4399	9.1623	7.79661	13.7711	10.0801	8.74407	6.65672
9_-_110446	NM_144784	Acat1	0.707024	0.488969	0.562429	1.00571	0.270834	555.672	518.205	530.797	531.17	456.427	26.1161	34.6547	36.911	45.5367	20.5879	25.6924	30.5835	29.775
1_+_170760	NM_133225	Acbd3	0.236957	0.10431	0.0797648	0.117003	0.230383	1944.34	1866.75	1910.1	1824.15	1953.81	56.0268	70.3325	68.8482	59.096	38.1193	49.6075	38.2436	30.4728
2_+_74159	NM_001102438	Acbd5	2.63952	1.92356	1.5293	1.86441	1.85991	1888.78	1914.87	1904.39	1914.31	1923.61	40.1786	52.4297	74.0838	68.7006	16.6739	18.7605	17.8808	14.0262
7_-_66190	NM_025408	Acer3	0.0370749	0.135969	0.13267	0.0999487	0.121639	923.396	1027.47	932.649	835.204	1049.22	30.5804	26.2148	35.8639	32.6554	17.1152	11.8422	13.156	8.23121
6_+_71238	NM_001077713	Acn9	0.0800624	0.0947677	0.13725	0.044116	0.0809422	633.299	482.318	563.028	1124.43	751.838	14.7321	9.20716	9.1623	17.4011	1.7781	1.15287	1.96508	1.708
X_+_56360	NM_019736	Acot9	0.270026	0.791667	0.337778	0.142094	1.76961	144.775	138.865	141.158	141.672	149.774	105.804	87.468	96.5969	87.5706	29.9061	24.6344	32.3491	17.2051
2_+_11432	NM_007387	Acp2	1.6145	0.397378	0.48399	0.658379	1.15742	1470.95	1736.94	1951.75	1610.11	1725.68	14.0625	16.624	18.8482	24.8588	19.8995	20.9257	12.2405	12.0392
X_-_50790	NM_019477	Acsl4	0.636064	1.05632	1.40325	1.59622	1.11905	2211.26	2432.28	2381.56	2425.75	2418.01	88.6161	110.358	129.843	67.4576	29.1399	35.6382	28.4528	18.4821
19_-_11475	NM_007392	Acta2	0.0022625	0.00179257	0.00187359	0.00151196	0.0059162	181.836	178.188	171.983	173.817	174.925	6422.54	5731.46	3852.88	2627.12	5492.24	4165.02	3590.63	2412.05
12_-_109711	NM_134156	Actn1	0.478864	0.365599	0.403888	0.427244	0.866355	666.001	653.097	660.388	661.76	659.32	1297.32	949.361	809.424	699.887	545.683	366.875	222.585	157.14
12_+_56444	NM_019785	Actr10	0.055623	0.064301	0.081448	0.081448	0.0667348	108.933	107.792	96.9905	109.52	118.238	102.902	107.161	105.759	115.028	20.7434	23.9963	25.5274	25.3397
1_-_226977	NM_146107	Actr1b	1.21637	0.377775	0.485691	0.853121	0.915395	1082.22	1158.46	1241.45	1207.17	1177.3	100.223	106.394	101.309	94.8023	62.8944	60.5926	50.755	45.0926
1_-_74117	NM_001205386	Actr3	0.647409	0.289496	0.266506	0.323353	0.651835	1015.33	1028.95	1028.8	1024.65	1022.64	358.036	300.895	292.147	212.655	256.87	256.892	235.606	137.358
2_+_11480	NM_007396	Acvr2a	0.728435	0.746783	0.860572	1.25404	0.99893	1850.6	1775	1795.76	1811.96	2120.19	25.6696	40.9207	35.0785	48.1356	8.00284	14.4185	6.7985	7.60677
15_+_11482	NM_009612	Acvrl1	1.10512	0.706817	0.793942	1.12814	0.461842	1363.04	995.119	1063.37	1228.47	1093.91	13.1696	16.1125	16.2304	21.5819	10.4808	17.1296	12.7245	16.7799
12_-_66204	NM_025421	Acyp1	0.830769	0.155769	0.311538	0.155769	0.934615	198.405	183.364	188.429	192.323	194.419	12.2768	12.532	16.2304	17.5141	2.98357	3.86498	9.72535	17.6773
11_-_75572	NM_029344	Acyp2	0.772727	0.666667	0.142857	0.25	1.24138	263.333	295	281.846	289.17	286.012	15.625	14.9616	23.0366	18.8701	3.03247	3.78225	7.63905	7.33908
9_+_11487	NM_007399	Adam10	2.83395	0.45975	0.385022	1.03671	8.66891	2127.41	2128.27	2128.4	2128.46	2128.9	139.955	135.55	146.597	169.266	67.6129	60.08	49.4285	39.6224
2_-_110751	NM_001163529	Adam33	0.392838	0.11309	0.365083	0.326546	0.448414	400.194	465	397.734	384.64	429.568	2.00893	8.18414	6.5445	9.15254	3.52656	7.18851	6.82591	8.04491
16_-_11504	NM_009621	Adamts1	1.3724	0.182654	0.18472	0.274362	1.04773	1543.79	1516	1531.13	1524.2	1539.06	193.304	415.473	407.33	580.113	64.0456	119.615	62.3474	71.8369
1_+_240913	NM_172845	Adamts4	1.0172	1.07994	0.863441	0.717563	0.827957	2452.71	2470.81	2181.45	2008.2	2460.56	12.0536	16.3683	21.2042	24.8588	3.50526	3.49455	3.42308	2.66595
16_-_23794	NM_011782	Adamts5	0.315842	0.749013	0.574306	0.615129	0.474277	1827.43	2141.38	2064.43	2030.52	1990.28	88.1696	251.918	235.34	248.588	25.6788	75.3382	53.2726	55.8779
13_+_108154	NM_001081020	Adamts6	1.05237	0.992699	1.0705	1.52288	4.65429	2262.68	2483.88	2407.51	2724.49	2760.91	18.5268	16.2404	22.2513	13.6723	11.652	10.5313	8.13396	4.68571
3_+_56417	NM_001038587	Adar	0.929505	0.830236	0.709409	0.683176	1.24024	2135.59	2158.56	2061.23	2174.98	2163.1	12.2768	17.5192	11.2565	19.435	10.7265	15.602	10.8224	14.1102
10_+_66757	NM_025748	Adat2	0.341599	0.56654	0.942411	0.711106	0.689895	1718	1963.27	1970.44	1087.88	2056.62	7.36607	6.90537	8.37696	7.34463	5.70464	7.04768	5.93755	3.26787
6_+_11517	NM_007407	Adcyap1r1	3.28831	0.556692	0.498608	1.20835	0.955748	3715.42	3459.23	3592.05	3316	3696.35	4.91071	11.7647	3.66492	3.50282	6.23574	15.9208	6.83509	3.62628
19_+_27360	NM_013758	Add3	2.26744	0.391486	0.710088	1.19945	1.2672	1703.57	1626.14	1694.81	1728.44	1690.95	25	12.0205	23.0366	28.1356	15.5795	11.4211	11.523	13.3305
6_-_68465	NM_197985	Adipor2	3.94624	2.21717	2.58065	3.45161	1.2972	2308.74	2294.32	2228.48	2226.02	2374.85	18.9732	18.2864	17.2775	16.9492	6.1601	7.0011	13.8963	24.8987
18_-_240442	NM_175028	Adnp2	0.676923	0.210388	0.255715	0.37814	0.415516	906.202	859.641	962.865	908.464	946.657	8.70536	6.64962	7.32984	7.9096	11.7031	8.55868	12.6019	12.7244
10_-_211488	NM_001005419	Ado	0.727136	0.346628	0.414005	0.777188	0.774853	2738.72	2680.93	2724.79	2700.42	2709.4	61.1607	41.9437	28.0105	37.1751	14.3304	10.4251	10.0949	7.32104
11_+_11541	NM_007413	Adora2b	3.82866	0.484798	0.17861	0.874105	0.976941	508.757	605.244	580.229	592.73	564.013	27.4554	15.0895	19.3717	16.8362	13.2823	5.78153	8.37754	8.67515
9_+_72141	NM_028121	Adpgk	0.0405708	0.0176006	0.0213245	0	0.611152	909.274	908.803	903.879	908.762	900.965	45.3125	27.3657	26.4398	25.6497	31.5141	18.3684	13.7203	10.1148
19_-_110355	NM_130863	Adrbk1	0.140562	0.121132	0.117551	0.099179	0.101698	473.965	284.813	355.602	380.077	444.096	31.0268	22.5064	23.822	17.7401	34.2277	21.4642	22.6467	18.1145
15_+_11564	NM_009634	Adsl	0.380641	0.120235	0.0655011	0	0.105749	420.083	401.475	407.191	410.676	417.032	53.5714	36.1893	29.0576	28.1356	35.4633	25.1646	26.4775	20.3023
1_-_11566	NM_007422	Adss	4.26426	4.99481	6.01778	6.34108	7.73029	790.308	816.922	826.941	826.652	792.363	109.152	76.4706	79.0576	63.5028	82.5295	50.1561	57.2876	37.2631
7_+_68048	NM_001162939	Aen	0.0958908	0.157833	0.220805	0.157442	0.135888	1394.1	1255.29	1347.3	1310.98	1424.17	67.4107	69.0537	49.2147	74.4633	50.3816	45.8868	36.0619	38.9293
1_+_347722	NM_001037136	Agap1	0.295578	0.374443	0.393268	0.404398	0.504309	2047.37	1743.38	1998.22	2040.32	2241.82	29.4643	40.0256	35.6021	30.6215	3.82323	8.47448	5.10458	8.35221
1_+_15463	NM_010472	Agfg1	0.328212	0.253826	0.328419	0.404802	0.314142	1129.23	1186.08	1529.81	1254.89	1535.37	80.5804	55.1151	58.1152	65.6497	50.7841	39.5471	27.4889	19.2545
8_+_52123	NM_026792	Agpat5	0.148443	0.157324	0.186505	0.0989619	0.0309936	249.406	334.551	229.028	218.282	274.52	39.7321	27.3657	30.6283	27.5706	14.2068	10.3724	12.4709	10.462
2_+_228061	NM_172666	Agps	4.82036	2.39256	2.20023	4.28452	3.93411	3525.86	3524.26	3490.91	3512.3	3552.64	70.9821	55.4987	58.377	48.5876	64.2655	43.6905	22.4175	12.2006
4_-_11610	NM_009642	Agtrap	0.682936	0.341147	0.429978	0.40399	0.517391	3123.35	2888.9	3126.68	3227.27	2968.18	6.91964	19.9488	19.3717	23.2768	3.60023	6.08762	5.49095	6.38993
1_-_226747	NM_026375	Ahctf1	0.187146	0.331509	0.214086	0.149009	0.173314	425.202	547.365	515.558	544.307	493.74	95.9821	50	49.4764	44.7458	32.972	17.7706	22.2881	12.8471
12_-_11622	NM_013464	Ahr	1.80507	0.404632	0	0.435822	1.01551	2600.67	2578.91	2599.27	2579.12	2599.89	17.6339	3.83632	10.733	29.9435	7.29924	1.37176	2.77028	6.29885
4_-_230249	NM_172381	AI314180	0.0417411	0.129861	0.241228	0.187852	0.0883278	194.806	235.73	243.67	248.089	231.842	77.0089	68.9258	73.2984	81.5819	41.61	29.1923	20.1811	17.0666
19_-_107197	NM_001160356	AI462493	0.169952	0.258974	0.378987	0.158916	0.0894885	258.853	274.632	250.012	253.261	254.735	21.2054	21.3555	23.0366	31.9774	11.5595	11.5771	15.3448	43.2111
2_+_108897	NM_145144	Aif1l	0.906756	0.350314	0.425503	0.808455	0.582563	1768.78	1609.95	1691.61	1770.91	1679.98	26.7857	19.6931	27.7487	21.1299	13.6409	13.5927	10.4497	10.4834
19_-_11632	NM_016666	Aip	0.0167959	0.0175433	0.0227856	0.030052	0.0274202	200.931	156.581	175	159.333	183.821	33.0357	46.0358	35.3403	38.5311	29.1521	37.1815	48.3092	62.8348
4_+_11639	NM_009647	Ak4	1.59879	0.310917	0.388008	0.72628	0.853326	3037.76	2949.08	2776	2930.84	2997.34	2.90179	6.26598	8.11518	9.26554	4.64411	5.47589	8.16354	6.3636
14_-_219181	NM_001164503	Akap11	0.252709	0.571258	0.584679	0.563499	0.52712	1919.35	2461.86	2424.36	2675.48	2316.07	28.3482	33.8875	42.4084	52.7684	26.8589	21.4125	14.7715	11.5928
10_-_432442	NM_018747	Akap7	3.49681	3.64625	6.5752	4.40837	3.63629	1536.56	1501.11	1493.68	1258.32	1665.71	6.02679	3.96419	7.32984	6.32768	5.04378	4.45698	4.74348	5.70962
17_-_56399	NM_019774	Akap8	0.863422	0.920431	1.5309	1.19636	0.706244	1143.76	997.232	1008.46	997.079	1131.42	50	42.9668	46.5969	35.4802	20.1801	15.0827	15.2294	8.28635
5_+_100986	NM_194462	Akap9	4.25163	1.59436	2.44469	Inf	3.18872	447.38	410.698	401.875	443	443.871	11.8304	16.3683	15.1832	16.6102	9.77981	7.28443	5.5827	4.16486
4_-_68050	NM_023423	Akirin1	0.89172	0.111465	0.208391	0.111465	2.08391	1550.89	1565.5	1565.7	1559.6	1556.07	23.8839	24.4246	25.1309	21.1299	29.3582	29.5382	25.6721	16.6162
4_+_433693	NM_001007589	Akirin2	0.442432	0.14239	0.173798	0.147686	0.569242	605.097	611.592	615.843	631.531	631.926	110.045	97.0588	108.377	76.0452	35.7105	44.8531	56.7925	53.6247
6_+_67861	NM_172398	Akr1b10	0.0719687	0.0847458	0.0739599	0.0777401	0.0444568	321.228	365.631	367.035	346.432	363.967	14.5089	21.7391	19.3717	27.5706	12.5499	14.6029	17.6549	17.8181
13_-_56043	NM_018859	Akr1e1	0.707527	0.414996	0.309677	0.647966	0.461022	389.566	398.216	411.659	385.417	397.94	24.7768	21.7391	26.9634	34.1243	10.0945	12.0515	14.2518	14.2608
7_+_11652	NM_001110208	Akt2	5.5625	2.34757	2.09654	1.89762	1.12235	1237.25	1129.78	1197.2	1214.16	1224.14	12.0536	19.1816	23.0366	23.7288	48.8538	54.0098	47.5483	51.0064
1_-_23797	NM_011785	Akt3	0.949609	0.254615	0.346681	0.672765	3.64826	3684.21	3926.66	3365.8	3534.02	4144.81	19.4196	9.07928	10.733	14.5763	16.8028	9.6199	4.51459	4.48618
8_-_14339	NM_010241	Aktip	0.637681	0.393375	1.04382	0.256211	0.956522	663.685	717.326	772.531	766.729	743.266	10.2679	16.624	18.3246	17.8531	12.7673	15.659	16.0515	17.028
4_-_17025	NM_008525	Alad	0.0713592	0.0951456	0.24466	0.125243	0.0183495	351.846	484.938	251.792	690.815	302.865	25	12.2762	14.1361	12.5424	29.2322	13.5542	15.3262	14.0956
10_-_216188	NM_153543	Aldh1l2	1.12641	1.39015	2.39639	4.56043	3.38901	2928.87	2671.69	2853.37	2824	2850.18	8.70536	30.5627	25.6545	23.0508	7.19146	22.9378	7.58088	6.63829
19_-_67689	NM_026316	Aldh3b1	3.49806	0	0	3.59801	0.453803	368.921	363.4	368.688	371.233	368.157	2.23214	6.13811	7.8534	9.37853	1.23346	2.64501	4.19101	7.16215
3_+_66789	NM_024178	Alg14	0.107567	0.136628	0.129543	0.181483	0.203784	457.276	423.5	430.552	456.026	481.758	31.6964	40.7928	39.5288	41.0169	17.5141	23.1918	23.419	22.9414
3_+_66248	NM_025442	Alg5	0.495906	0.199949	0.257163	0.343663	0.193129	193.705	193.102	182.269	206.088	185.212	48.2143	44.6292	47.644	49.0395	37.4691	39.8151	49.5916	44.4504
7_+_381903	NM_199035	Alg8	4.9187	Inf	2.0122	1.7439	Inf	267.939	221.528	211	185.636	267.364	11.8304	10.7417	11.5183	7.45763	31.5155	22.9153	13.3992	12.5407
2_-_69113	NM_026944	Alkbh3	0.164234	0.152654	0.0484023	0.0925413	0.0346133	257.781	256.917	258.058	263.02	256.981	10.7143	13.1714	13.3508	12.0904	12.4085	13.8423	18.7444	18.8266
11_+_268420	NM_172943	Alkbh5	1.0349	0.431403	0.51631	0.782719	0.958619	3073.77	3094.3	3076.07	3061.49	3067.77	36.6071	34.6547	48.1675	43.8418	22.6898	23.0112	15.7529	12.1947
9_+_67667	NM_026303	Alkbh8	Inf	4.63429	8.28992	1.01321	2.56181	3165.97	3185.16	3099.54	3027.2	3266.82	14.0625	11.7647	10.4712	9.26554	4.98835	4.83831	2.89462	2.04021
8_-_23802	NM_011787	Amfr	0.341228	0.0476253	0.146592	0.187131	0.963888	1300.56	1311.41	1310.09	1306.55	1306.18	131.473	103.325	109.162	101.921	114.062	88.2214	117.76	118.149
15_-_105827	NM_001164602	Amigo2	3.01927	3.69022	3.22894	3.69022	11.6857	768.171	734.333	721.396	729.538	768.027	3.34821	6.77749	3.40314	4.18079	1.22122	2.3623	1.23135	1.4771
18_+_225339	NM_153515	Ammecr1l	1.76438	0.326702	0.41862	0.769171	1.68597	2982.54	2949.33	3032.59	3067.61	3090.23	30.1339	28.3887	19.8953	24.0678	22.1128	22.4512	13.4359	15.159
9_-_75723	NM_001081395	Amotl1	5.68518	0.931528	1.02834	2.08962	4.31675	5231.73	5264.13	5448.9	5349.16	5506.38	66.2946	65.8568	76.9634	87.7966	28.3867	27.6413	23.5689	88.4182
11_+_13929	NM_001252193	Amz2	0.105023	0.235171	0.134406	0.322175	0.0985477	239.256	244.661	232.395	191.832	255.517	27.0089	31.0742	32.7225	43.9548	17.5435	16.6225	15.3531	19.4355
2_-_17222	NM_008569	Anapc1	0.954913	0.614133	1.0258	1.12805	0.468641	977.38	1029.97	862.296	1053.78	1164.56	53.3482	47.0588	45.5497	44.5198	68.1714	43.4793	24.4813	18.0281
8_+_68999	NM_026904	Anapc10	1.34286	0	0	0	0.419643	191.531	191.985	193.429	192.222	190.99	29.2411	25.0639	28.2723	22.8249	6.91261	7.08667	7.48114	7.02772
11_+_66156	NM_001038230	Anapc11	0.0166408	0.00913266	0.00561896	0.0214796	0.211252	309.833	319.545	323.973	301.898	320.158	22.5446	23.6573	23.0366	29.2655	36.2569	32.9979	36.1167	49.1953
10_-_52717	NM_025514	Anapc16	0.157328	0.241209	0.205561	0.162696	0.294078	573.131	490.901	590.446	573.805	535.906	45.3125	55.3708	52.356	56.2712	27.159	43.5174	60.9096	59.2183
15_-_11600	NM_009640	Angpt1	0	0	0	0	0.606036	2251.82	2247.14	2256.45	2253.55	2257.55	3.125	8.82353	25.9162	32.4294	2.4093	4.02564	8.12219	7.97511
2_+_26360	NM_011923	Angptl2	0.630737	0.542253	0.538656	0.544871	0.87821	1313.21	1285.32	1291.65	1318.85	1316.25	70.7589	71.7391	103.927	122.712	82.7443	57.9729	69.1571	78.5132
4_-_654812	NM_001039554	Angptl7	0	0	0.199091	0	0.655829	940.333	946.273	940.333	937.146	940.059	2.45536	1.53453	10.733	13.4463	1.2165	1.96112	8.55244	9.31242
3_-_109676	NM_001034168	Ank2	0.923582	0.302903	0.306524	0.539167	1.01048	2219.54	2282.25	2225.32	2216.06	2211.43	12.5	20.3325	17.5393	20.452	4.17988	7.51218	5.77853	5.78344
11_+_11736	NM_009671	Ankfy1	0.054215	0.00646407	0.0187967	0.0743035	0.143752	3607.46	3620.09	3608.88	3629.14	3605.51	28.3482	33.7596	35.8639	43.9548	27.9963	27.0107	23.8946	20.9289
5_-_70797	NM_001289529	Ankib1	1.63894	0.33844	0.391599	0.746948	0.953979	2432.96	2487.64	2478.85	2558.28	2491.26	37.2768	41.4322	31.4136	31.8644	19.8157	20.2482	20.073	16.2768
5_+_71782	NM_001253814	Ankle2	0.691258	0.4011	0.670776	0.371231	0.59909	1367.48	1412.69	1228.34	1506.85	1435.94	17.8571	14.7059	12.3037	16.6102	10.7947	7.23886	5.80847	5.74033
12_+_217473	NM_146033	Ankmy2	Inf	3.99725	3.15247	14.2067	8.1851	802.302	810.19	780.696	757.684	843.444	9.375	8.82353	4.97382	10.1695	10.993	8.33944	11.5615	12.7859
3_+_433667	NM_001013806	Ankrd13c	1.16325	1.05221	1.00665	1.0303	2.37011	1495.51	1520.55	1545.38	1614.55	1437.65	45.5357	45.3964	40.5759	33.7853	12.3242	12.8912	11.309	8.66911
5_-_81702	NM_198010	Ankrd17	0.536692	0.356815	0.388363	0.645603	0.641217	826.902	917.574	903.635	913.262	845.625	146.205	107.928	131.675	124.407	63.7299	34.0434	22.0462	23.0683
1_-_109346	NM_026241	Ankrd39	0.1951	0.0957764	0.141891	0.144425	0.367396	466.4	430.5	498.481	340.75	435.464	1.33929	3.45269	3.14136	3.16384	2.80952	2.73098	3.1399	3.372
9_-_56503	NM_019683	Ankrd49	0.0563665	0.179002	0.244544	0.0957551	0.486592	1372.8	1389.51	1373.56	1375.07	1371.57	34.1518	12.2762	14.6597	15.5932	7.32891	4.45407	5.8145	4.61764
3_-_99696	NM_001167883	Ankrd50	0.232146	0.143301	0.19236	0.29888	0.402777	1732.08	2046.08	1787.57	2013.33	1754.36	66.7411	43.2225	46.3351	30.3955	50.6677	31.0339	37.6627	27.7977
9_-_68743	NM_028390	Anln	0.118706	0.0337698	0.0325537	0.0446415	0.0417845	1137.31	1084.51	1059.44	1083.43	1180.57	63.3929	24.0409	33.7696	9.83051	62.9471	27.525	18.0361	5.32827
4_+_67628	NM_130889	Anp32b	0.00771961	0.00936347	0.00506108	0.00277415	0.00226165	382.528	377.764	381.84	381.323	383.232	440.402	283.12	256.021	177.853	76.8787	76.6986	144.578	242.021
3_+_66471	NM_001253758	Anp32e	0.188187	0.603505	0.533237	0.388342	0.270405	1495.1	1132.74	1206.65	1073.72	1420.84	88.3929	59.0793	55.4974	40.113	39.3841	27.7949	26.2292	18.1721
5_+_11745	NM_013470	Anxa3	0.183775	0.160445	0.111986	0.080355	0.280339	359.977	352.678	354.981	353.554	360.951	545.982	340.537	332.984	255.028	250.394	169.478	223.914	173.128
6_-_11746	NM_013471	Anxa4	2.26641	1.18354	1.19776	1.45194	1.20278	838.185	781.946	821.749	820.596	849.5	20.7589	30.5627	29.8429	35.4802	35.1328	45.8947	47.8885	48.7579
14_-_11750	NM_009674	Anxa7	0.612108	1.22422	1.20408	0.994498	0.705635	621.321	589.285	562.482	568.542	659.631	122.321	98.2097	106.283	113.672	60.4527	58.6447	67.8941	57.3059
3_-_211556	NM_145964	Ap1ar	1.01252	0.0461943	0.0991689	0.315695	1.443	1458.63	1459.07	1457.65	1469.18	1457.71	28.3482	21.7391	25.3927	25.1977	18.4977	14.8176	15.5458	12.2789
11_+_11764	NM_001243044	Ap1b1	0.65384	0.106263	0.263573	0.24985	0.439379	813.416	826.512	817.889	809.281	817.751	18.3036	35.6777	33.5079	40.339	16.7317	18.6782	17.6004	19.8482
11_+_71770	NM_027915	Ap2b1	2.25299	2.98858	5.91442	3.86343	2.56269	1108.33	1298	1253.75	1150.33	1258.05	22.9911	22.1228	10.4712	17.1751	64.6082	53.0164	32.0118	28.1099
16_+_11773	NM_009679	Ap2m1	0.0225289	0.0135803	0.00878446	0.0120526	0.0931303	520.69	517.729	520.46	512.921	523.732	76.5625	82.4808	72.5131	81.0169	151.634	148.396	184.036	183.552
13_+_11774	NM_009680	Ap3b1	0.216771	0.0234606	0.169174	0.0658571	0.776551	540.736	541.923	535.341	539.638	539.704	43.5268	57.0332	66.4921	67.9096	30.9829	32.3409	27.2718	28.6509
14_-_55946	NM_018829	Ap3m1	0.100181	0.0496403	0.06289	0.0956729	0.115886	1913.32	1884.82	1921.14	1874.62	1899.56	23.2143	26.4706	20.4188	25.8757	278.312	216.702	195.622	142.663
8_-_64933	NM_029505	Ap3m2	Inf	1.19497	Inf	2.09119	0.540581	1635.62	1451.57	1494.79	1520	1800.79	3.125	2.42967	2.09424	6.55367	3.36652	2.37977	2.09974	3.80664
18_+_11777	NM_009681	Ap3s1	0.168415	0.188049	0.218709	0.211524	0.463833	539.146	533.392	536.811	543.649	541.808	130.804	133.12	149.215	166.328	83.8133	102.121	122.81	101.113
7_-_11778	NM_009682	Ap3s2	0.109484	0.135863	0.152169	0.15978	0.174677	2966.65	3293	2571.01	2937.67	2998.78	11.3839	11.509	5.49738	8.81356	4.29212	3.93495	3.03978	3.45406
5_+_11781	NM_021392	Ap4m1	0.205668	0.46366	0.488874	0.543407	0.542765	1517.28	1721.75	1364.4	1489.42	1445.56	10.7143	11.6368	16.2304	12.7684	7.53968	7.67035	7.59493	6.05589
10_-_11783	NM_009684	Apaf1	4.91777	4.55098	3.13814	3.85814	8.90724	1850.29	1885.63	2002.54	2061.98	2044.98	18.0804	21.3555	24.8691	19.435	16.2371	17.8124	15.0534	18.1882
2_+_54519	NM_019456	Apbb1ip	11.3287	6.41958	4.05944	12.4615	3.49301	296.804	320.99	310.097	311.55	307.547	69.4196	67.5192	76.178	61.3559	15.2783	19.1008	18.7817	15.4348
5_-_11787	NM_001201416	Apbb2	2.29219	0.555589	0.498939	1.19149	2.0185	3692.08	3699.09	3677.07	3700.25	3710.59	43.0804	45.1407	45.5497	44.2938	43.7837	41.1445	25.2495	14.5403
18_+_11789	NM_007462	Apc	0.0612542	0.355401	0.308853	0.127417	0.163619	1051.51	1214.5	1114.32	1242.84	1147.92	46.2054	49.7442	50.2618	54.3503	19.9975	15.7041	5.47221	3.7182
X_-_77622	NM_029943	Apex2	0.00762885	0.0577282	0.064687	0.0246105	0.0107978	965.333	656.75	1234.47	1318	906.556	4.46429	9.71867	3.9267	5.08475	8.81772	8.32318	8.69398	5.67068
9_-_208117	NM_177583	Aph1b	0.176512	0.430341	0.593098	0.695437	0.453754	2672.18	2936.47	2953.34	3313	2948.6	15.1786	9.71867	10.9948	15.9322	5.91082	4.17315	3.54746	3.83158
2_-_11800	NM_007466	Api5	3.97756	2.5857	1.82089	2.06306	2.25644	1786.02	1732.7	1627.59	1740.01	1850.95	68.9732	58.6957	45.5497	45.9887	72.8254	57.4953	49.3716	36.4126
X_+_68117	NM_026565	Apool	0.442073	0.332594	0.120347	0.211069	0.163328	258.588	247.862	243.507	226.717	279.031	19.4196	29.2839	27.7487	25.3107	9.76727	8.8983	11.3185	10.779
11_-_66884	NM_025825	Appbp2	0.194593	0.536935	0.428289	0.419387	0.320659	3512.17	3560.66	3693.08	3564.47	3435.14	26.3393	31.7136	32.4607	24.0678	21.7475	21.4856	12.2741	7.91674
14_-_72993	NM_145221	Appl1	0.0238466	0.12127	0.0965858	0.0594063	0.0414474	1896.27	2055.14	1917.2	2008.93	2076.59	52.0089	47.4425	46.5969	47.6836	13.8116	12.1851	8.05849	5.81693
4_-_66408	NM_001025445	Aptx	0.0586644	0.0584105	0.0661986	0.0571125	0.152062	413.486	309.792	457.457	546.241	860.112	11.8304	12.0205	15.1832	13.1073	8.32189	10.0516	13.636	13.4789
9_-_213827	NM_145985	Arcn1	0.173467	0.00651582	0.00870052	0.052679	0.163581	1790.41	1791.93	1791.47	1791.09	1791.05	217.634	215.473	231.937	208.362	125.605	126.239	95.9713	65.5622
11_-_11840	NM_001130408	Arf1	0.191301	0.0832394	0.141328	0.0849714	0.748235	1113.72	1111.65	1111.46	1114.24	1113.49	409.821	383.248	395.288	462.599	270.372	247.412	221.367	214.79
14_+_11843	NM_007479	Arf4	2.47639	1.12798	1.02882	1.33607	1.43987	1467.42	1046.68	1344.71	1447.14	1520.18	8.48214	11.3811	11.2565	10.1695	157.112	177.718	175.091	187.609
12_+_11845	NM_007481	Arf6	0.410951	0.240575	0.268554	0.292086	0.266901	1584.37	1722.02	1687.34	1673.71	1715.97	260.045	224.297	229.319	203.164	66.7475	58.9811	58.1556	46.8243
2_+_228998	NM_001177710	Arfgap1	1.48495	0.954903	1.19419	1.05503	1.91976	967.913	982.724	989.966	944.176	931.791	21.875	34.2711	31.1518	30.2825	25.722	30.3102	26.691	26.4598
15_-_66251	NM_025445	Arfgap3	1.06705	0.0633547	0.233507	0.349904	3.22621	908.198	909.233	904.956	907.313	910.851	33.4821	58.0563	59.4241	77.5141	12.1019	19.8967	22.096	29.5732
1_-_211673	NM_001102430	Arfgef1	0.721795	0.50877	0.793481	0.688853	1.46447	1191.17	1207.35	1200.07	1204.54	1185.47	49.5536	45.3964	49.4764	47.1186	27.5995	21.3246	10.9788	7.18316
2_+_99371	NM_001085495	Arfgef2	0.782272	1.26629	1.30787	1.50719	1.74861	2361.46	2776.62	2545.73	2838.06	2875.2	21.2054	24.6803	26.7016	27.7966	12.911	14.2865	9.23171	7.37756
3_-_99889	NM_001081093	Arfip1	3.43044	2.00304	2.0959	2.31074	3.37019	1584.27	1588.71	1585.44	1590.21	1580.12	56.25	73.1458	67.801	66.6667	52.6573	65.4257	73.2755	52.502
7_-_76932	NM_029802	Arfip2	0.173822	0.237081	0.307784	0.33701	0.333378	1037.9	998.466	1227.97	1154.77	1097.39	29.6875	36.3171	36.3874	46.1017	20.2857	31.0491	30.3643	25.8298
2_-_228482	NM_181416	Arhgap11a	1.46187	0.364229	0.554292	0.489129	0.740681	1543.3	1504.15	1511.36	1610.64	1450.38	48.8839	21.7391	27.4869	11.8644	22.4041	10.2295	9.70574	4.88773
18_-_75415	NM_029277	Arhgap12	1.48445	0.536656	0.450791	1.14977	0.681489	1628.71	1726.39	1554.59	1629.3	1652.26	15.8482	18.5422	18.5864	17.6271	8.06363	8.40003	7.87774	5.16227
10_+_73910	NM_176837	Arhgap18	2.99191	0.565139	1.74528	1.84501	0.415544	1236.57	1353.3	1214	1190.15	1245.01	4.46429	4.60358	7.06806	12.0904	1.8017	1.47868	1.9055	1.70147
9_+_244867	NM_175535	Arhgap20	1.16445	0.0587288	0.295479	1.25071	1.50231	3136.34	3114.86	3165.65	3217.2	3268.96	1.5625	5.11509	5.2356	18.9831	1.1782	3.43883	3.60889	12.8867
5_+_231532	NM_001286468	Arhgap24	0.0241947	0	0	0	0.234411	526.767	518.867	524.379	533.364	533.41	20.0893	20.5882	23.0366	23.1638	13.959	13.8937	13.3491	13.106
17_-_268970	NM_172964	Arhgap28	7.49863	1.69371	1.52925	2.87521	2.58923	2853.08	2957.62	2661.28	2810.83	2901.26	8.70536	11.1253	12.0419	20.678	5.96095	7.13167	5.7808	6.23973
9_-_71544	NM_027823	Arhgap42	0.733593	1.42161	1.5307	2.14203	1.40811	1957.1	2107.45	2156.89	2232.68	2243.44	31.0268	23.4015	24.0838	24.0678	18.5605	12.0566	10.9223	7.32634
12_+_11855	NM_009706	Arhgap5	1.18201	0.348863	0.417509	0.509297	0.668895	1844.55	1853.37	1830.77	1794.17	1857.98	68.75	53.8363	58.9005	55.5932	70.6552	51.2671	36.1246	23.5208
6_-_11857	NM_007486	Arhgdib	0.0800025	0.0272201	0.0567279	0.0182277	0.225626	446.781	449.874	451.732	451.065	448.872	137.946	148.593	189.529	176.045	281.731	236.783	417.748	314.57
8_+_234094	NM_001037736	Arhgef10	3.17744	1.79681	1.69698	2.14119	1.77969	1208.78	1130.81	1199.88	1235.37	1203.47	16.0714	10.6138	15.7068	16.9492	8.28818	7.59065	5.23471	6.08543
4_-_72754	NM_001290803	Arhgef10l	0.986928	0.403743	0.204192	0.435409	5.78699	435.6	452.333	437.118	468	465.293	6.02679	8.69565	8.37696	9.26554	6.29889	6.97752	7.04897	17.7675
3_+_213498	NM_001003912	Arhgef11	0	0	0	0	0.0771082	848.176	854.273	851.25	889.778	864.143	2.45536	2.55754	4.71204	2.37288	8.50918	7.35101	3.34494	2.75651
9_-_69632	NM_027144	Arhgef12	1.64779	1.62954	1.66382	3.89939	9.98902	4803.11	4827.29	4818.04	5042.34	4941.21	50.8929	42.3274	40.5759	47.6836	23.869	17.9166	9.63335	7.96688
4_+_213649	NM_172520	Arhgef19	5.31095	2.50348	1.14159	2.21216	2.1838	730.958	705.294	642.571	604.333	703.638	3.79464	2.68542	3.14136	5.31073	3.72795	2.80708	3.07343	4.76877
17_+_239985	NM_001085355	Arid1b	0.700569	0.310284	0.32856	0.590899	1.10407	1143.87	1218.55	1236.46	1239.04	1190.44	47.5446	42.9668	53.1414	41.9209	7.71099	7.80835	6.82777	5.57576
15_+_77044	NM_175251	Arid2	0.214747	0.407049	0.47008	0.408215	0.311268	2228.24	2432.11	2402.66	2176.47	2377.76	19.8661	16.3683	19.8953	16.6102	12.1828	9.50196	11.1114	8.85154
13_+_94246	NM_198122	Arid4b	0.771044	0.256726	0.145989	0.103835	0.493172	1600	1588.37	1601.62	1616.85	1594.89	9.15179	9.97442	10.2094	12.5424	14.5062	14.3246	12.257	10.8455
9_-_23807	NM_011790	Arih2	0.408852	0.382475	0.550946	0.499824	0.389131	1747.77	1619.35	1823.59	1889.43	1855.67	17.1875	12.0205	14.6597	17.4011	20.4184	20.2112	17.5362	10.6436
11_-_70317	NM_197995	Arl16	0.263232	0.229835	0.26288	0.250213	0.344839	707.591	684.265	655.647	819.85	861.204	7.58929	10.8696	10.4712	11.0734	10.4183	12.3239	8.98763	12.2253
12_-_11861	NM_001039515	Arl4a	0.030442	0.0640063	0.109725	0.0499562	0.072355	712.343	706.304	858.667	891.25	959.328	17.6339	8.4399	10.4712	14.8023	6.26719	3.36656	4.62914	5.22745
1_-_320982	NM_177305	Arl4c	1.96556	0.982967	1.33167	2.09225	1.98581	2094.69	2281.86	2055.31	2140.24	2201.67	69.4196	36.7008	53.1414	45.4237	13.8177	7.22361	14.5411	8.4323
2_+_75869	NM_029466	Arl5b	0.886455	2.6994	2.11891	3.00251	Inf	5546.57	5738.07	5627.71	5199.4	6024.3	15.4018	17.2634	17.801	15.2542	6.0201	8.67278	3.98461	2.94009
7_-_54208	NM_019419	Arl6ip1	0.128803	0.203489	0.258056	0.0944186	1.37076	1380.19	1381.6	1381.39	1381.28	1381.54	83.9286	76.5985	83.2461	73.8983	122.603	100.398	103.346	85.9045
6_+_65106	NM_022992	Arl6ip5	0	0.00788346	0	0.008762	0.0171419	757.054	752.067	747.8	751.516	756.943	6.69643	7.67263	8.11518	11.8644	74.9994	62.0214	72.4223	79.403
6_+_67166	NM_026011	Arl8b	2.03715	0.913449	1.02927	1.30172	1.43277	1987.02	1964.35	1940.81	1956.75	1936.11	56.6964	92.4552	76.9634	76.7232	65.4689	93.8986	59.8845	46.4115
3_-_74252	NM_028840	Armc1	0.4452	0.528617	0.564869	0.706648	0.386621	1243.09	1303.36	1371.39	1312.09	1437.56	39.2857	44.3734	50	38.7571	15.8349	13.9712	13.2962	11.7704
5_+_67211	NM_026034	Armc10	2.44672	0.802739	0.72424	1.25125	1.26915	1003.3	1016.29	1010.35	1002.62	1004.5	14.0625	16.2404	12.5654	14.4633	19.01	17.9159	18.0213	20.2053
3_+_11863	NM_009709	Arnt	0.984785	0.433495	0.504663	0.835534	1.89876	1573.45	1709.37	1499.31	1440.65	1709.74	22.0982	22.2506	24.8691	30.8475	17.1446	17.9653	12.6301	13.4575
2_+_74192	NM_028809	Arpc5l	0.137478	0.219733	0.195486	0.114826	0.289609	527.176	537.669	537.77	540.75	539.557	72.7679	80.0512	84.8168	95.1412	22.8537	26.2644	33.964	69.3585
18_+_545260	NM_001038499	Arsi	0.278649	0	0.0278649	0.51749	0.613027	1268	1005.78	868.615	1236.53	1080.98	2.00893	1.6624	3.9267	11.9774	1.21967	1.34748	1.27071	4.86213
3_+_271970	NM_173451	Arsj	1.806	0.936328	0.58946	1.30172	1.1253	816	861.362	925.571	907	874.282	10.4911	7.16113	14.6597	16.8362	6.11487	5.37533	4.56499	7.60132
13_-_77041	NM_029847	Arsk	0.443824	0.267629	0.24237	0.365612	0.427224	1413.51	1329.83	1345.06	1441.5	1383.94	5.13393	4.21995	4.18848	9.03955	6.92908	8.10657	6.1316	5.37299
X_+_76219	NM_029541	Arxes1	0.315212	0.832159	0.302603	0.174579	0.837563	646.663	723.333	743.882	816.125	726.452	3.34821	6.52174	4.18848	4.74576	1.45398	1.74443	1.42978	3.40645
19_-_54447	NM_018830	Asah2	Inf	1.96102	1.81017	Inf	Inf	389.358	440	456.974	416.133	421.841	2.00893	4.85934	3.9267	9.26554	5.15611	5.15636	2.99794	3.99433
15_-_13196	NM_010026	Asap1	0.502996	0.49997	0.496408	0.591988	0.610502	1089.84	1186.67	1226.82	1249.74	1180.14	156.696	177.877	139.791	160.339	64.745	56.1989	33.0352	34.3423
4_+_230837	NM_001008232	Asap3	0.277475	0.113485	0.171807	0.651612	1.00056	1448.86	1282.12	1174.38	1879.62	1888.24	1.78571	4.09207	3.40314	4.29379	1.42087	2.19588	1.75728	2.82558
1_+_65247	NM_023046	Asb1	2.5074	0.622324	0.457591	0.577212	2.61921	4643.37	4581.5	4576.95	4603.17	4660.68	7.58929	7.80051	9.1623	11.2994	4.74313	4.59647	3.52499	9.29688
11_+_75452	NM_029291	Ascc2	0.134729	0.465109	0.33655	0.315484	0.358839	2324.95	2321.29	2113	2254.47	2327.49	20.7589	30.9463	24.8691	31.2994	18.875	20.5638	13.473	13.8647
10_+_66403	NM_025541	Asf1a	1.52183	0	0.235521	0	1.81351	203.634	197.818	203.887	208.544	201.571	30.5804	19.3095	20.6806	15.8192	5.59694	4.35423	5.42345	3.91196
8_-_23808	NM_011791	Ash2l	3.3423	1.40236	1.33371	1.22123	0.682304	347.718	341.675	318.159	398.175	328.728	35.7143	35.422	35.8639	37.8531	19.7007	20.8368	22.0351	17.6077
5_-_109900	NM_133768	Asl	0.0148936	0.0382979	0.0191489	0.0297872	0.0121857	68.5424	88	65.9429	66.0769	62.0274	13.6161	17.9028	13.6126	16.4972	10.7407	14.0969	13.9417	11.1119
13_+_66695	NM_025711	Aspn	4.30278	3.50206	4.25039	3.21022	2.76267	887.221	827.706	887.834	886.246	891.539	47.0982	141.944	94.7644	204.52	43.4277	106.842	59.2475	73.2635
2_+_11898	NM_007494	Ass1	0	0	0.00115263	0.00214784	0.00519941	252.372	253.829	256.449	251.074	261.623	7.8125	15.0895	14.1361	12.8814	97.436	183.567	234.102	204.164
9_+_66595	NM_001164828	Aste1	Inf	0.746269	0.149254	Inf	0.383795	104.646	123.2	112.974	116.5	118.951	13.3929	9.71867	12.5654	9.26554	7.09583	4.44565	4.11316	3.5164
2_+_228790	NM_001039939	Asxl1	2.59885	1.93812	1.40954	Inf	0.277923	911.766	1122.67	1025.04	1046.44	1164.66	27.2321	27.2379	25.1309	25.9887	15.1067	13.0327	9.17848	6.06861
12_+_75302	NM_001270988	Asxl2	1.17418	3.88785	2.60929	Inf	1.11547	2148.4	3528.29	2814.44	3601.27	3001.85	15.625	12.7877	11.7801	11.4124	11.4044	8.07477	4.76946	2.50815
19_-_67979	NM_026487	Atad1	1.09668	0.408665	0.50806	0.599323	1.11056	1302.3	1397.08	1360.89	1323.11	1328.41	53.5714	44.2455	46.0733	43.3898	61.952	47.9791	44.1933	31.1155
1_-_226641	NM_001081304	Atf6	1.22288	0.762431	0.904186	1.49177	1.05003	3618.86	3617.38	3367.6	3688.11	4047.85	40.625	32.6087	34.2932	35.5932	22.0621	18.4019	8.98108	7.45461
6_+_54343	NM_019426	Atf7ip	0.158654	0.881657	0.655449	0.983392	0.475334	2163.89	2669.1	2015.99	2520.86	2354.44	25.6696	21.2276	19.3717	34.2373	25.3804	12.6114	5.56118	8.84145
18_-_67526	NM_026217	Atg12	Inf	10.644	4.52186	5.26657	4.53336	1874.16	1885.44	1831.83	1859.21	1831.67	41.2946	43.8619	52.356	53.7853	17.9142	21.3267	27.0826	25.1942
2_-_51897	NM_145528	Atg13	0.860459	0.295599	0.28977	0.478539	0.862249	1569.65	1359.84	1503.72	1386.46	1528.11	7.14286	12.9156	13.089	14.9153	6.12473	8.13925	6.55856	6.63506
12_-_76559	NM_029654	Atg2b	2.55817	1.06614	0.597181	0.586257	0.801218	879.044	900.92	886.71	882.686	877.228	30.5804	28.2609	26.7016	28.7006	20.4114	19.1815	12.0317	13.8537
X_+_666468	NM_174875	Atg4a	0.163383	0.172631	0.295143	0	1.92619	858.885	862	863.204	859.633	865.601	12.2768	14.4501	20.6806	22.9379	3.88095	5.73816	8.11187	8.13301
1_+_66615	NM_174874	Atg4b	0.180977	0.248053	0.207841	0.236241	0.222906	842.243	742.485	750.717	773.128	786.277	14.7321	13.555	10.2094	21.2429	18.8676	16.9457	16.1081	15.3044
1_+_108147	NM_026195	Atic	0.0104605	0.0243261	0.01784	0.0176589	0.0300779	757.732	804.659	775.164	783.655	755.84	18.3036	17.1355	15.1832	21.2429	91.8523	64.5683	41.0208	21.4249
19_+_109168	NM_146091	Atl3	2.24327	1.88971	1.76134	2.56299	7.16067	3909.12	3755.18	3828.89	3908.42	3917.13	60.4911	59.8465	53.9267	59.435	67.5011	39.2628	22.4842	16.9613
9_-_11920	NM_007499	Atm	1.03155	0.171896	0.262472	0.508291	0.749658	2557.87	2549.73	2581.17	2359.11	2530.51	24.7768	19.4373	21.2042	19.096	8.64176	7.24573	10.1611	8.7809
8_+_234776	NM_177700	Atmin	1.07264	0.954182	1.0691	4.8428	0.896815	1875.64	1955.73	1853.13	1908.33	2099.5	9.15179	11.6368	15.7068	14.8023	4.42884	4.16227	2.50226	2.30681
7_+_11982	NM_009728	Atp10a	4.92593	0.639731	1.5582	2.17508	2.42778	600.793	473.545	545.222	531.41	557.296	19.6429	25.3197	20.4188	24.4068	10.1158	9.48712	4.44603	3.62037
8_+_50770	NM_015804	Atp11a	4.09742	0.483373	0.77171	1.15281	5.39216	3565.77	3562.5	3563.95	3566.33	3564.21	131.473	108.696	141.623	125.085	60.9061	44.6324	56.9302	58.4074
3_+_76295	NM_029570	Atp11b	0.24031	0.0689779	0	0	0.382031	1063.47	1079.47	1070.34	1069.45	1076	16.7411	11.1253	18.0628	18.0791	17.5192	14.1968	8.50681	8.27794
16_-_224088	NM_001128096	Atp13a3	1.00866	0.497598	0.593263	0.867398	0.787237	2364.57	2657.68	2596.56	2642.08	2553.04	112.5	71.3555	93.1937	78.5311	34.2948	22.9192	12.4891	10.1036
9_-_11933	NM_007502	Atp1b3	0.759941	0.15202	0.203353	0.438582	1.00248	742.217	789.03	779.221	789.109	776.484	198.438	165.857	172.251	147.345	192.513	156.365	144.029	123.163
10_+_67972	NM_026482	Atp2b1	0.51719	1.02546	0.984912	1.3043	1.1562	1598.6	1759.83	1730.45	1796.7	1804.54	91.7411	71.3555	73.2984	62.1469	33.3557	28.9188	26.3331	19.5981
18_+_11946	NM_007505	Atp5a1	0.109071	0.0635779	0.0736785	0.119582	0.258315	232.743	245.206	246.305	250.92	239.424	413.17	454.22	431.414	388.814	408.526	376.928	354.331	294.568
3_-_11950	NM_009725	Atp5f1	0.821652	0.666667	0.929293	0.960317	2.40504	265.981	269.412	266.263	270.743	268.232	503.571	504.859	494.764	455.367	78.0671	83.3192	84.0096	98.6321
12_+_68055	NM_026536	Atp5s	Inf	Inf	Inf	Inf	Inf	527.892	626.586	452.774	551	660.6	6.47321	6.77749	7.06806	9.60452	4.44357	4.32168	5.105	5.64789
5_+_21871	NM_011596	Atp6v0a2	0.617144	0.213185	0.272824	0.389462	0.605154	1685.9	1580.12	1630.68	1604.86	1742.19	44.4196	51.9182	52.8796	43.5028	29.556	27.1762	18.1269	20.989
16_-_11964	NM_007508	Atp6v1a	1.51341	0.270327	0.479756	0.757127	1.90723	2000.77	2005.52	2006.69	2003.46	2006.23	63.1696	90.2813	114.398	94.9153	41.8173	66.2341	49.2273	40.184
15_+_66335	NM_025494	Atp6v1c1	0.200915	0.269874	0.30072	0.31046	0.286378	538.72	514.426	493.909	479.019	529.155	45.5357	70.4604	54.712	53.8983	46.2158	70.0081	76.1306	51.6497
4_+_66290	NM_024173	Atp6v1g1	4.53485	3.20658	3.82001	6.75931	3.72781	462.637	448.663	460.524	462.859	465.048	274.554	325.831	290.576	224.859	27.0903	39.2121	56.7075	81.0658
1_+_108664	NM_133826	Atp6v1h	0.078681	0.0695122	0	0	0.154433	284.891	287.405	286.229	284.36	287.659	35.2679	52.046	42.9319	37.4011	35.5532	50.4504	56.1001	48.7439
18_-_50771	NM_015805	Atp9b	0.172224	0.170174	0.167444	0.0822318	0.391512	1090.85	992.417	1052.63	1033.43	1085.72	8.03571	10.4859	9.1623	10.8475	17.4272	16.3691	14.5815	11.154
11_-_246782	NM_145427	Atpaf2	1.31623	0.90948	1.79298	2.37974	2.12303	719.133	711.755	683.219	708.341	696.214	11.8304	13.4271	11.5183	13.2203	14.204	12.9175	16.8879	12.5687
2_+_11990	NM_009730	Atrn	1.84914	1.50032	1.7125	3.57553	4.99291	3662.71	3628.51	3728.36	3887.05	3607.7	29.2411	32.2251	38.7435	38.1921	22.3793	20.3373	13.0979	10.6967
13_-_20238	NM_009124	Atxn1	6.19316	2.64595	3.33673	8.03848	34.9851	6427.04	6506.12	5941.3	6447.67	6531.79	38.1696	27.2379	33.7696	34.0113	13.3786	6.38057	3.08354	2.25724
15_+_54138	NM_016843	Atxn10	1.65003	2.1523	2.20166	2.26482	2.48393	251.494	244.636	247.665	248.026	249.383	185.938	216.24	220.419	212.203	111.535	123.958	130.223	127.513
8_-_52335	NM_001080930	Atxn1l	1.28092	0.047968	0.0961226	0.428031	1.16894	5054.48	5055.54	5051.78	5062.81	5039.83	28.3482	17.7749	16.4921	12.9944	8.14061	5.67642	4.41826	5.15153
14_+_246103	NM_139227	Atxn7	9.5572	0.450048	0.638614	1.40324	4.72171	1667.41	3270.69	2964.2	2899.09	2928.32	13.1696	9.71867	11.5183	9.49153	7.34366	5.99865	7.99452	7.64933
9_-_270156	NM_001134902	AU019823	1.88316	1.42172	1.672	1.77228	1.41071	1864.72	1838	1923.92	1839.52	1848.92	6.69643	9.07928	8.63874	9.83051	6.34682	6.09147	5.42336	4.67331
4_-_230696	NM_001012400	AU022252	0.0481809	0.0253623	0.0320733	0	0.0478632	222.791	197.731	204.5	234.2	218.556	11.6071	9.20716	11.7801	9.15254	9.97352	10.7086	7.90858	7.13843
2_-_20878	NM_011497	Aurka	0.382979	0.244681	0.166547	0.270437	0.846972	569.143	569.842	575.424	560.708	578.63	36.8304	21.7391	17.0157	8.24859	45.094	19.1534	23.3332	8.5725
5_-_319974	NM_177047	Auts2	0.609966	0	0.252295	0.061292	0.857456	1981.56	1973.94	1966.32	1980.75	1934.2	11.8304	6.39386	13.6126	14.0113	3.17363	1.94552	2.33263	3.77817
2_+_74268	NM_001165935	Aven	0.581224	0.298793	0.225405	0.363099	3.58394	328.167	327.019	327.721	332.429	326.87	23.2143	25.7033	18.3246	18.1921	8.8064	15.2148	14.1766	6.44197
19_-_69534	NM_027106	Avpi1	1.85052	1.56489	1.65274	2.40458	0.717002	304.149	299.688	309.609	303.549	308.791	35.0446	40.9207	40.0524	36.1582	22.8755	25.4284	41.992	44.0596
10_+_54140	NM_016847	Avpr1a	0.0755369	0.461614	0.862653	0.765441	0.878242	1330.36	1282.3	1210.19	1264.81	1140.53	9.59821	34.0153	29.5812	37.1751	4.0082	11.8614	7.27024	9.58983
15_-_106064	NM_145930	AW549877	1.77607	1.34678	1.27944	2.79716	4.1325	3597.89	3478.38	3365.64	3295.19	3561.81	17.6339	23.913	27.7487	27.7966	17.0141	17.42	11.8159	10.2152
7_-_26362	NM_001190975	Axl	8.9901	2.60676	2.63444	3.69804	3.46954	1316.45	1333.6	1327.58	1327.31	1323.07	413.393	356.394	287.173	239.774	301.345	229.268	184.935	118.321
3_-_26879	NM_020026	B3galnt1	0.404313	0.42102	0.397995	0.314465	0.934237	810.627	821.446	818.799	819.324	815.412	76.1161	41.9437	53.4031	61.4689	25.7938	14.9197	13.5305	13.6279
13_+_97884	NM_178640	B3galnt2	1.67285	0.896706	1.28291	1.75863	1.61137	1959.5	1928.1	1834.26	1841.75	1912.79	22.3214	16.7519	18.8482	18.4181	14.1539	10.2133	8.61992	6.12759
4_-_117592	NM_080445	B3galt6	0.139892	0.139783	0.133812	0.174492	0.334027	1038.57	993.469	1061.63	1143.12	995.812	14.2857	13.9386	13.3508	11.4124	4.15634	3.96163	4.27604	4.46081
19_+_108902	NM_175383	B3gnt1	2.29428	0.565808	1.08571	1.03142	4.70633	610.082	615.102	617.401	613.903	613.73	37.0536	34.399	32.4607	39.322	17.3952	12.6078	18.1198	25.1769
11_-_53625	NM_001169114	B3gnt2	0.619565	0.187039	0.168018	0.205452	2.15794	1217.62	1210.51	1204.53	1213.22	1217.06	16.2946	21.3555	17.0157	16.9492	26.8991	42.6421	57.8171	63.5326
18_-_56386	NM_019737	B4galt6	0.386227	0.276656	0.31407	0.482456	0.583999	3358.16	2999.67	3408.46	3319.29	3412.83	27.0089	20.7161	28.534	27.2316	12.383	8.67931	7.49212	7.47958
6_-_101148	NM_175312	B630005N14Rik	0.906489	0.764295	0.670881	0.384353	1.46036	2276.51	2455.82	2431.61	2498.54	2421.81	62.9464	68.9258	73.2984	76.0452	9.73534	14.034	10.02	10.4953
9_+_23821	NM_011792	Bace1	0.533012	0.277298	0.31696	0.512445	0.908894	3316.96	2866.27	2962.19	2819.25	3066.43	41.0714	37.0844	43.9791	78.9831	27.5381	23.4897	16.775	16.1184
16_+_12013	NM_007520	Bach1	2.62726	0.409999	0.432539	0.747281	1.82621	3354.65	3367.22	3362.15	3349.91	3367.43	39.7321	44.6292	45.8115	40.678	23.8337	34.3998	30.2007	20.5484
8_-_67384	NM_026121	Bag4	0.15789	0.435395	0.394655	0.274429	0.325806	1789.18	2160.09	2042.11	2228.75	1900.47	25.6696	15.7289	15.445	14.5763	5.80274	5.75318	4.1815	3.61955
5_-_66898	NM_025833	Baiap2l1	0.738875	0.235701	0.184719	0.314945	1.74744	968.56	768.139	721.464	814.914	972.884	17.6339	10.7417	9.1623	9.71751	12.9679	5.10834	5.08094	3.3981
16_-_70508	NM_027444	Bbx	0.901867	1.0151	1.1281	1.8883	3.18617	5299.68	5476.89	5418.06	5471.04	5373.85	18.5268	17.0077	21.2042	18.3051	13.783	13.8362	10.5367	17.0947
17_+_80748	NM_030561	BC004004	0.0874426	0.125504	0.146843	0.162261	0.0465843	238.136	134.043	202.312	234.765	157.581	41.0714	49.1049	44.5026	66.8927	45.3361	41.7508	61.6761	69.9105
13_+_79555	NM_024473	BC005537	1.99047	0.830249	0.903311	1.09453	1.73714	968.605	1016.26	1010.89	1047.7	983.416	33.9286	28.5166	36.6492	30.3955	39.1961	37.6644	33.1894	26.4973
16_+_212547	NM_145972	BC027231	0.938939	0.656725	0.424181	0.238596	0.357205	1445.58	1170.16	1181.41	1380.24	1418.51	22.9911	29.6675	23.822	20.452	12.2056	11.503	7.89384	5.88026
2_-_227622	NM_153557	BC029214	0.00370501	0.0394078	0.0319621	0.0206422	0.0330275	611.5	177	901.167	487.357	557.188	5.13393	6.13811	3.66492	9.03955	3.8816	8.03408	11.0299	15.647
7_+_233812	NM_001164580	BC030336	2.37523	0.260299	0.394743	0.929765	1.94713	3375.43	3533.18	3469.7	3499.67	3493.47	39.2857	23.1458	27.4869	19.209	27.5747	28.705	28.2512	27.0628
X_-_27061	NM_012060	Bcap31	0.127631	0.133596	0.117167	0.0961366	0.299697	365.513	364.133	359.231	357.396	364.2	92.6339	83.1202	94.5026	111.525	115.91	122.064	172.298	200.61
3_+_68183	NM_026602	Bcas2	0.460275	0.233425	0.32096	0.429799	1.26247	291.882	300.438	304.207	312.545	312.616	93.75	83.8875	74.8691	80.339	54.4129	48.0567	44.62	55.0041
6_-_12035	NM_007532	Bcat1	0.0145947	0.0138491	0.0279734	0.0171964	0.0176341	1446.32	1325.26	1630.59	1572.72	1788.74	43.5268	72.7621	77.7487	49.3785	52.5137	81	68.1059	43.6952
7_+_12041	NM_009739	Bckdk	0.0141774	0.0333048	0.0432962	0.0404304	0.0596547	398.25	468.529	437.87	464.586	446.08	18.9732	17.6471	15.1832	18.4181	46.851	42.7404	30.1715	25.6997
6_+_94044	NM_153516	Bcl2l13	0.0310731	0.139255	0.143035	0.107733	0.120731	1891.53	1911.64	1928.26	2084.93	1963.82	31.25	24.6803	25.3927	24.5198	9.68531	8.16367	6.92236	4.86965
9_+_80288	NM_030256	Bcl9l	4.78254	4.77118	10.9822	8.71592	5.16553	1976.23	1672.7	1551.37	1719.48	1913.06	13.6161	13.1714	10.9948	17.5141	12.2823	11.486	8.43951	10.1758
10_+_72567	NM_001025393	Bclaf1	0.33243	1.56257	1.60176	1.01832	0.173751	745.724	489.068	626.82	658.861	778.758	209.821	182.097	206.806	123.955	70.0976	54.8718	30.1984	22.8476
X_+_320376	NM_178782	Bcorl1	0.10246	0.129121	0.141826	0.168537	0.288823	819.126	687.455	993.103	1178.84	1025.93	4.91071	4.98721	6.5445	8.0226	4.3027	2.44654	1.60887	2.86848
10_+_110279	NM_001081412	Bcr	0.487501	0.434293	0.442705	0.50542	0.588232	1538.79	1829.52	1557.4	1730.59	1692.84	16.2946	19.3095	21.466	24.7458	20.765	16.6397	13.6561	11.6981
1_+_66821	NM_025784	Bcs1l	2.295	0.945	1.16591	8.1	1.24875	95.9565	91.0714	92.4419	84	76.3151	6.25	5.49872	6.80628	8.24859	6.97088	6.12008	7.46856	6.86874
16_+_71911	NM_001122683	Bdh1	0.604885	2.19271	1.48701	0.63849	0.635129	1321.33	1362.95	1123.46	1289.11	1374.31	4.24107	4.73146	4.97382	2.93785	11.2902	9.69719	7.95937	4.01377
2_+_12064	NM_001048142	Bdnf	0.29379	1.60568	1.2529	0.88066	0.516998	867.931	1224.1	1103.58	1077.55	1024.64	62.2768	51.1509	63.8743	46.8927	28.9656	23.7781	22.5044	17.0486
13_-_544971	NM_001081061	Bdp1	2.67374	0.665793	1.28193	1.24775	3.22428	2218.09	2203.87	2261.9	2259.05	2254.18	31.4732	17.5192	15.7068	14.9153	10.1764	5.05515	3.17596	3.14184
11_-_56208	NM_019584	Becn1	22.2386	8.075	11.3136	5.67841	4.33545	509.259	482.373	493.629	481.508	499.858	60.4911	71.9949	64.9215	82.5989	31.6324	33.4444	38.9931	45.6203
6_-_12068	NM_009748	Bet1	0.0925926	0.25	0.283951	0.311728	0.0524691	488.792	487.048	447.914	528.96	537.98	36.8304	41.4322	39.267	45.8757	11.3547	13.4749	16.0342	18.9614
9_-_11796	NM_007464	Birc3	0.0990867	0.154508	0.13112	0.105184	0.18899	670.179	662.833	668.882	736.286	656.156	5.35714	8.69565	5.49738	8.70056	6.19659	6.84413	5.93807	6.52929
17_+_12211	NM_007566	Birc6	3.07978	1.55256	3.1685	2.51896	5.84018	739.494	715.936	730.404	704.037	728.875	59.1518	53.8363	63.6126	40.565	48.843	34.4523	35.9657	27.3515
11_+_104184	NM_178645	Blmh	0.903368	0.567982	0.350989	0.791975	1.72518	712.074	668.153	675.047	691.923	686.03	26.3393	21.9949	17.0157	22.8249	19.3762	17.2258	15.8399	13.0539
7_-_232946	NM_177692	Bloc1s3	1.69123	0.651823	0.920398	1.19926	1.97228	1061.67	1043.25	988	954	1098.5	2.67857	3.06905	3.40314	4.0678	3.93456	5.61337	11.3694	10.6313
1_-_66352	NM_001160209	Blzf1	1.1071	0.233075	0.410039	5.53552	1.45857	901.225	947.437	904.18	943	909.081	19.4196	17.7749	22.7749	22.2599	7.74229	8.73018	6.79842	5.07459
2_+_12151	NM_007552	Bmi1	0.725977	0.181981	0.17515	0.301583	0.59778	1761.59	1746.94	1746.65	1736.29	1761.84	39.5089	40.665	42.9319	41.5819	27.7857	25.4767	20.0668	13.8108
5_+_140780	NM_080708	Bmp2k	5.28863	1.98617	1.877	2.72286	3.32129	3412.41	3656.95	3576.78	3650.6	3363.43	16.2946	12.1483	9.1623	6.55367	12.5307	9.95919	15.4153	8.17808
14_-_12166	NM_009758	Bmpr1a	0.864727	0.39648	0.450438	0.622037	0.928093	3309.71	3346.97	3239.54	3165.39	3287.08	68.0804	74.0409	73.2984	80.226	40.8837	44.5339	33.8192	25.2449
3_-_12167	NM_007560	Bmpr1b	0.75263	10.9459	2.25789	7.14181	19.8302	2835.8	3278.52	3201.85	2964.68	3047.53	14.7321	22.6343	18.0628	15.2542	5.37899	6.89384	4.86519	3.23061
1_+_12168	NM_007561	Bmpr2	4.888	0.525028	0.728611	2.49501	2.87074	6838.26	6744.33	6767.3	6863.95	6805.94	81.9196	70.844	76.7016	92.9944	49.8393	38.1111	31.0615	19.5476
4_-_242509	NM_172870	Bnc2	0.745816	1.13271	0.686966	0.648351	0.776115	931.933	1587.86	1516.31	1317.44	1340.83	8.25893	16.2404	14.3979	9.03955	5.58585	10.6773	9.50859	8.61175
9_+_12175	NM_001008238	Bnip2	4.63736	2.07026	2.51905	3.68389	3.86147	940.315	747.504	855.688	817.978	841.539	111.607	119.821	95.288	95.1412	85.6574	87.3951	77.165	77.7331
7_-_12176	NM_009760	Bnip3	9.69289	2.95402	2.87629	3.83385	4.60714	887.149	789.692	863.833	881.389	885.264	11.6071	46.6752	110.471	103.39	7.82117	30.7862	86.9305	71.5837
14_-_12177	NM_009761	Bnip3l	0.328588	0.190604	0.198641	0.247379	0.422757	2162.12	2029.97	2076.31	2027.11	2140.96	65.4018	114.962	129.581	154.915	34.509	58.567	68.8258	52.9148
5_-_665775	NM_001081422	Bod1l	1.27714	2.80891	1.90682	1.57901	2.02482	861.116	944.314	964.908	1021.01	978.728	19.1964	13.9386	21.466	11.6384	13.9639	12.0452	9.1918	7.26396
15_-_12181	NM_013481	Bop1	0.32367	0.420646	0.390927	0.287765	0.448604	210.161	210.46	205.612	201.378	204.801	28.125	26.3427	19.3717	20.452	37.5039	33.9502	32.7293	26.0125
6_+_12183	NM_007563	Bpgm	6.58021	Inf	5.46927	2.62069	Inf	628.857	622.964	616.976	627.707	632.291	25	15.7289	21.466	17.0621	9.4281	8.26575	11.4391	12.8042
1_+_23827	NM_011794	Bpnt1	2.00811	0.834541	0.763632	1.51724	0.966419	901.656	1071.15	988.803	1022.02	982.556	36.8304	22.1228	25.6545	13.2203	31.1581	22.3637	23.3872	24.34
6_-_109880	NM_139294	Braf	1.21809	0.9185	0.856122	1.63974	1.83795	6680.12	6561.57	6434.47	6583.74	6888.6	30.8036	26.087	28.534	39.887	10.7743	12.8098	11.4048	10.3638
15_-_223770	NM_001033274	Brd1	0.560101	0.200003	0.185947	0.279023	0.480364	1125.29	1151.08	1148.74	1149.74	1137.63	17.8571	20.3325	24.3455	16.8362	21.6045	21.162	19.5913	13.722
13_+_105246	NM_001024508	Brd9	0.0836183	0.143824	0.136975	0.0599265	0.254555	505.25	508.057	509	511.667	512.727	11.8304	10.7417	11.7801	12.4294	9.91098	9.12991	10.7797	11.3416
12_-_72308	NM_028193	Brf1	0.0477308	0.141294	0.21226	0.169808	0.100544	795.5	1237.31	866.487	1290.61	1157.14	19.8661	19.9488	18.8482	19.209	9.69975	8.6668	8.56959	10.2515
8_-_66653	NM_025686	Brf2	0.202041	0.404082	0.471429	0.161633	0.148163	202.299	228.774	276.565	170.462	245.22	6.91964	5.88235	6.80628	6.66667	5.19798	5.05474	5.54525	6.51706
5_+_76809	NM_029752	Bri3bp	0.00482068	0.0374243	0.0195194	0.0112172	0.0146365	1157.07	1501.71	1223.31	1170.59	1364.47	77.0089	54.2199	61.5183	47.1186	18.3758	10.9469	12.6312	10.4777
12_+_52592	NM_001037756	Brms1l	Inf	1.07108	1.54359	1.42627	1.67012	1413.44	1284.64	1364.75	1398.88	1456	16.9643	14.1944	19.8953	11.0734	26.4515	22.3253	23.4706	17.1585
17_+_268936	NM_001081315	Brpf3	0.101589	0.204648	0	0	0.104905	1829.54	1820.73	1833.29	1827.13	1830.9	9.82143	7.92839	6.02094	8.24859	11.2546	6.94734	7.13437	8.11733
19_+_107182	NM_001080706	Btaf1	0.727289	0.491554	0.804777	0.650499	0.91124	1806.29	1711.09	1899.6	1926.18	1933.57	37.7232	25.7033	25.3927	22.1469	17.5567	12.7242	6.8405	5.76727
7_-_83962	NM_146193	Btbd1	0.272761	0.256291	0.201212	0.195441	0.123273	662.857	534.073	555.331	501.671	745.6	69.8661	65.7289	64.3979	66.1017	42.1215	36.0863	33.6922	31.2127
12_-_238386	NM_172806	Btbd7	1.24232	1.10097	0.99053	1.52179	1.30731	3698.83	3433.88	3616.27	3431.75	3633.81	41.0714	36.0614	30.8901	37.1751	16.5037	15.336	14.8153	15.6792
4_-_70533	NM_027453	Btf3l4	1.22131	2.67678	1.34382	1.91643	1.4411	696.621	691.222	657.188	697.154	792.801	89.5089	101.279	103.927	96.7232	51.3875	60.488	43.6523	45.5928
1_-_12227	NM_007570	Btg2	5.29326	2.24662	3.51813	7.1975	9.66754	1970.07	1918.53	1841.37	1938.8	1976.58	34.375	62.0205	84.8168	109.153	30.5062	53.15	81.7784	81.2479
7_+_12237	NM_009774	Bub3	0.0246721	0.025265	0.0376655	0.0227835	0.0552608	499.741	404.361	455.952	467.595	450.924	87.2768	67.1355	60.733	53.7853	132.633	128.257	180.376	130.732
17_-_53414	NM_016859	Bysl	0.130933	0.277591	0.223105	0.226923	0.133097	684.346	649.01	671.925	742.373	700.664	42.8571	32.3529	28.7958	24.1808	20.6014	17.1751	14.8664	19.6063
1_+_66882	NM_025824	Bzw1	0.870308	0.451789	0.525277	0.693626	0.969272	1668.38	1539.69	1557.88	1579.18	1719.5	399.554	362.916	365.707	318.87	197.009	158.148	125.245	100.461
19_+_226089	NM_001081319	C030046E11Rik	1.47855	0.77307	0.910904	1.96177	2.15618	1810.99	2139.13	2055.62	1905.32	2020.26	21.2054	24.6803	23.5602	22.2599	22.3012	20.7412	10.4965	14.7129
6_+_94192	NM_052993	C1galt1	1.28968	2.21676	1.31896	2.31173	1.13704	3686.71	3456.74	3534.22	3489.39	3811.56	40.4018	34.7826	56.8063	40.678	19.816	18.1439	23.7475	12.249
X_-_59048	NM_021550	C1galt1c1	0.72056	0.246835	0.349684	0.524525	1.73443	359.041	360.219	363.106	359.824	353.765	28.5714	24.0409	26.7016	27.4576	52.3862	52.3895	45.3937	38.4507
2_-_227580	NM_153155	C1ql3	4.34088	0.18041	0.109415	1.23306	1.9514	2467.75	2474.42	2462.57	2464.2	2451.34	6.91964	12.4041	13.089	10.9605	5.86887	9.35548	5.67094	4.29766
11_+_69183	NM_026979	C1qtnf2	0.40107	0.454545	0.252525	0.568182	0.426136	193.836	179.842	188.975	196.327	195.313	4.24107	10.1023	12.8272	16.6102	5.08242	13.1494	18.2723	21.1937
15_+_81799	NM_030888	C1qtnf3	2.46606	0.868503	0.927226	1.29626	1.394	1226.83	1222.68	1233.09	1260.49	1228.86	103.348	90.1535	59.1623	88.1356	102.812	86.872	52.7129	53.6587
18_-_77422	NM_029909	C330018D20Rik	0.403614	1.35954	0.538153	0.677674	1.64008	1319.3	1039.21	1291.68	1388.79	1337.37	8.70536	9.71867	10.9948	11.8644	3.87368	3.60674	3.98958	5.02566
16_+_224171	NM_172616	C330027C09Rik	0.230756	0.362617	0.181308	0.287072	1.35981	646.682	658.722	604.588	667.388	696.038	43.3036	30.4348	25.6545	11.7514	27.7521	14.79	8.46339	4.17696
13_+_97863	NM_001033192	C78339	4.26949	1.19138	1.74674	4.81882	3.6344	2216.83	2250.57	2263.63	2243.17	2278.61	91.9643	96.5473	80.8901	85.1977	23.2235	26.0646	23.8884	22.2267
1_+_12283	NM_133781	Cab39	1.01764	0.410138	0.516318	0.897499	1.15655	2082.4	2216.52	2177.03	2128.23	2154.7	136.161	102.174	112.042	86.4407	71.6427	64.8126	44.4233	30.8918
14_+_69008	NM_026908	Cab39l	0.59389	0.430824	0.430301	1.09401	0.48583	1574.96	1539.89	1438	1561.53	1607.19	11.8304	10.8696	13.3508	19.435	15.1499	12.5305	11.4526	8.18893
2_-_252966	NM_145851	Cables2	0.263231	0.0365792	0.0644814	0.235774	0.501353	1455.84	1462.14	1487.98	1477	1473.86	20.3125	11.509	6.80628	13.1073	6.48347	4.15004	4.32071	6.67527
4_+_320508	NM_198037	Cachd1	0.596319	0.158336	0.308727	0.287117	0.450787	1081.36	1083.37	1070.23	1068.59	1200.09	19.1964	16.8798	15.1832	26.5537	14.1072	10.0247	14.2335	24.6099
6_-_12288	NM_009781	Cacna1c	0.186702	0.424579	0.536404	0.696813	0.818523	3067.82	2666.07	2955.19	3494.32	3298.66	25	24.0409	25.6545	26.6667	11.8264	6.96637	3.59532	3.88111
11_-_12291	NM_001177890	Cacna1g	0.501472	0.0671614	0.338494	0.999026	0.19099	369.295	476.667	419.787	448.526	423.936	4.6875	6.01023	4.97382	12.3164	3.27458	5.11447	5.80997	10.1658
1_-_12301	NM_009786	Cacybp	0.187552	0.15242	0.165191	0.135499	0.245959	587.566	581.737	584.381	586.67	588.625	171.205	110.102	113.351	105.537	147.535	93.1745	107.79	83.2934
12_+_12313	NM_009790	Calm1	0.0219586	0.0363765	0.0406569	0.0303117	0.035779	1110.07	1070.19	1080.55	1067.58	1152.88	435.938	494.373	564.66	508.475	404.338	357.701	177.197	144.2
7_-_12315	NM_007590	Calm3	0.637383	0.606408	0.564876	0.703081	0.585863	1331.96	1340.92	1322.19	1352.02	1374.62	176.339	197.826	219.11	202.825	258.265	244.657	286.47	327.091
2_-_227634	NM_001276361	Camsap1	0.862745	0.298851	0.300868	0.590299	0.823843	1240.08	1357.47	1304.14	1389.31	1259.72	33.7054	22.2506	19.6335	17.6271	16.1206	9.86417	7.31283	5.58227
1_-_67886	NM_001081360	Camsap2	1.78602	0.605581	0.605426	1.32692	2.15878	2422.42	2258.89	2267.98	2259.39	2309.35	32.1429	22.7621	19.6335	18.6441	17.3263	12.8476	5.09542	3.5693
10_-_71902	NM_027994	Cand1	0.111819	0.159143	0.159741	0.096134	0.256815	362.114	362.187	366.006	363.869	357.785	89.7321	67.7749	69.8953	79.435	75.2488	48.993	29.5054	18.3865
6_+_67088	NM_025958	Cand2	0.675177	0.119259	0.135821	0.223691	0.41256	1078.27	808.125	1024.88	991.529	1019.62	12.5	7.67263	8.90052	12.0904	6.51773	4.46421	4.50735	6.49718
11_-_76025	NM_001267592	Cant1	0.868923	0.264342	0.371868	0.293871	0.921878	1418.43	1332.74	1302.34	1282.32	1395.29	11.8304	18.2864	18.5864	30.8475	9.22489	10.4213	10.8445	11.3688
11_-_12330	NM_001110500	Canx	0.571272	0.299912	0.19266	0.255679	0.344267	1738.3	1651.43	1677.09	1644.85	1720.64	417.857	381.074	399.215	452.09	298.391	301.607	213.628	157.805
13_+_67252	NM_026056	Cap2	0.337045	0.318156	0.234163	0.620192	0.281868	936.889	833	888.146	525.741	826.755	13.8393	5.24297	7.06806	5.53672	9.44508	6.83944	4.35337	4.36473
3_-_12340	NM_009797	Capza1	4.10777	0.272628	0.475698	1.05132	2.39606	2030.17	2028.07	2027.81	2030.58	2032.25	136.607	141.176	140.838	125.989	128.963	112.88	88.7105	66.5299
6_+_12343	NM_007604	Capza2	2.51294	1.38555	1.47725	1.71179	1.63831	1083.83	1132.74	1123.5	1130.02	1114.92	195.089	169.693	184.817	183.051	105.568	108.584	113.454	91.0109
3_+_71934	NM_024495	Car13	0.233	0.196324	0.203875	0.360702	0.196034	447.927	527.286	513.098	577.548	469.646	6.25	7.80051	8.11518	9.26554	6.16851	5.58094	7.29444	5.86143
X_-_56078	NM_181315	Car5b	1.18705	0.248452	0.347833	0.196691	0.561318	1226.25	960.588	870.478	1023.02	1031.47	7.58929	5.88235	11.2565	13.3333	3.88571	5.03439	5.70105	6.85
16_-_52502	NM_025821	Carhsp1	3.61953	1.21215	1.24981	3.44627	1.28569	1548.56	1242.55	1155.42	1331.8	1408.61	52.9018	72.6343	70.6806	97.1751	67.5591	65.8185	79.6042	65.4235
2_+_319996	NM_001205371	Casc4	2.51869	1.61	1.53908	3.08811	2.20125	2161.27	2270.23	2197.23	2229.18	2190.18	20.9821	17.9028	26.4398	26.3277	22.8892	22.5355	13.6589	12.4678
X_-_12361	NM_009806	Cask	0.167783	0.201967	0.183908	0.172585	0.266261	1847.14	1630.46	1549.03	1750.23	1938.61	71.4286	80.0512	82.7225	88.2486	33.5773	40.1523	25.8952	21.4451
11_-_140721	NM_080643	Caskin2	1.03432	0.196745	0.10904	0.31676	0.880568	803.688	765.222	785.176	807.727	787.71	12.0536	11.6368	11.5183	12.0904	4.44826	3.15515	1.85597	2.18636
3_+_12368	NM_009811	Casp6	0.0529509	0	0	0	0.091359	385.649	393.274	384.743	383.948	392.767	13.8393	13.4271	20.1571	24.7458	12.0452	13.6657	16.8188	18.8574
1_+_12370	NM_009812	Casp8	0	0.0438596	0	0	0.00793441	314.118	274.301	286.067	280.055	308.419	36.3839	28.7724	28.7958	20.226	19.4812	16.011	18.1306	15.0962
16_+_208650	NM_001033238	Cblb	0.103687	0.178189	0.224482	0.295497	0.500558	1947.81	2770.8	2674.22	2941.84	2553.33	40.8482	19.5652	49.2147	30.8475	13.4596	6.7478	5.63835	5.58635
12_-_104836	NM_134048	Cbll1	0.244215	0.788381	0.806715	0.349433	0.220013	1718.96	1544.32	1544.84	1650.98	1684.7	16.5179	15.8568	14.9215	13.8983	6.7618	5.16066	2.2218	1.92114
8_+_234309	NM_145595	Cbr4	0.0100915	0.408707	0.100915	0.157428	0.0701819	617.692	640.361	495.953	417.909	707.926	13.6161	16.4962	11.5183	18.3051	7.92334	8.45989	9.32599	11.9553
15_-_12419	NM_001076789	Cbx5	0.223933	0.305958	0.294989	0.302862	0.286969	6552.99	6301.85	6199.93	6484.65	6072.98	160.491	75.5754	64.9215	59.096	85.32	44.0723	28.1366	17.5497
11_-_30951	NM_013926	Cbx8	0.393443	1.68618	1.51756	0.309133	0.273001	988.135	712.444	771.75	894.923	740.353	4.01786	3.06905	3.40314	3.84181	1.29385	1.54423	1.47175	1.42385
10_-_67500	NM_026201	Ccar1	1.43603	1.67536	2.53372	3.2365	2.32334	332.422	334.909	352.624	342.352	355.215	63.6161	76.087	73.5602	64.5198	32.6097	32.929	28.6825	22.1428
11_-_216618	NM_025740	Ccdc104	1.39007	0.937746	2.99007	1.31418	0.829667	225.686	219.953	216.497	214.043	215.047	108.705	114.834	151.047	125.65	15.1969	16.8772	18.7937	19.1801
18_-_240261	NM_001160399	Ccdc112	1.26131	1.68174	3.78392	Inf	5.46566	840.417	905.657	702.32	692.111	828.511	7.8125	3.19693	4.71204	5.31073	3.01893	1.62183	1.94832	2.68127
11_-_104479	NM_134033	Ccdc117	1.21981	0.429475	0.563247	0.743323	1.15628	2274.17	2220.29	2206.85	2364.4	2221.11	6.25	6.01023	6.5445	5.08475	5.27157	4.64587	4.91179	2.53138
14_+_108811	NM_175369	Ccdc122	0.852472	0.193227	0.386454	0.331246	0.49687	573.826	573.222	555.521	559.367	592.218	12.0536	9.07928	12.8272	19.661	1.7532	2.37426	4.10936	8.37787
6_+_57895	NM_175098	Ccdc126	1.43044	0.383064	0.320479	0.361175	0.76576	1415.91	1368.75	1359.42	1461.68	1416.27	23.2143	16.624	19.3717	20.678	10.8773	6.66679	7.15919	5.63479
11_+_67291	NM_152807	Ccdc137	1.16545	0.537302	0.528462	0.700287	0.763225	1809.74	1817.38	1761.55	1755.03	1822.6	21.4286	24.0409	17.2775	21.2429	21.0253	19.7784	18.39	17.022
14_+_67179	NM_145944	Ccdc25	0.277843	0.685608	0.559735	1.05778	0.190084	1315.76	1244.7	1341	1209.87	1337.56	12.0536	19.9488	18.0628	17.0621	9.96748	11.9614	12.065	12.6324
2_-_269336	NM_199310	Ccdc32	2.64716	1.03765	1.16328	1.70974	2.23117	756.333	824.107	801.71	828.075	775.044	16.7411	16.7519	13.8743	17.9661	5.84325	7.1913	11.5033	13.2187
2_+_68201	NM_026613	Ccdc34	0.0753785	0.120686	0.0126612	0.127945	0.0566352	368.602	372.496	403.593	430.224	407.237	25.6696	15.7289	17.5393	14.8023	20.0627	14.8894	22.3955	39.8004
11_-_67163	NM_026009	Ccdc47	0.394629	0.422304	0.395576	0.337755	0.405169	1029.43	1014.67	1064.21	1099.64	1116.12	93.9732	95.3964	100.262	86.8927	74.9015	72.1491	58.8116	64.2831
16_+_67501	NM_026202	Ccdc50	0.804039	0.995477	2.03656	1.4027	0.648015	2482.32	3112.42	3190.24	3086.71	3183.09	29.9107	31.0742	34.2932	32.8814	26.1513	21.4236	13.8862	10.4491
10_+_52713	NM_025602	Ccdc59	2.75862	1.79688	2.59528	1.33202	0.779504	325.771	275.518	285.239	273.682	298.636	55.1339	48.2097	52.6178	44.0678	8.95691	6.9297	9.45683	7.88137
18_+_381175	NM_201362	Ccdc68	0.418432	0	0	0.0806616	1.13473	440.571	435.448	435.299	435.404	436.186	6.47321	12.4041	12.3037	14.5763	2.26776	4.72312	9.56923	10.9297
9_+_72454	NM_133744	Ccdc71	0.34072	0.363653	0.36691	0.309824	0.289398	784.667	775.333	820.409	1005.08	903.667	12.0536	11.2532	10.2094	12.2034	10.7702	9.18915	10.6279	9.98086
16_+_67896	NM_026439	Ccdc80	0.00534123	0.0021423	0.00616921	0.00812362	0.0183275	185.758	192.741	181.556	189.577	186.816	201.339	354.476	339.529	421.13	123.405	179.633	126.8	184.537
19_-_108673	NM_023731	Ccdc86	0.259467	0.185766	0.318937	0.192065	0.177611	766.472	788.388	909.204	783.909	857.958	17.8571	17.5192	14.3979	13.3333	14.2917	14.8432	14.3772	12.3861
7_+_66365	NM_001162918	Ccdc90b	0.0937412	0.0210356	0.0551419	0	0.456311	363.972	379.788	353.4	378.969	372.283	17.8571	16.624	25.1309	27.5706	8.66876	10.3123	15.9319	15.1546
5_-_215707	NM_144819	Ccdc92	0.176809	0.10585	0.162823	0.092732	1.00825	971.778	1063.12	997.353	984.2	997.353	3.79464	4.34783	1.3089	3.84181	2.53284	2.58739	2.48686	2.11113
1_+_70829	NM_001025156	Ccdc93	0.0879433	0.521797	0.600566	0.32539	0.423524	3449.77	3333.09	3645.86	3089.97	4161.32	16.7411	23.4015	18.5864	21.9209	12.6585	13.1128	9.82116	9.53101
11_+_20296	NM_011333	Ccl2	0.351551	0.111407	0.262425	0.222578	0.582153	244.688	260.937	258.115	256.66	255.494	134.598	223.274	257.853	168.249	121.575	192.568	182.715	181.789
3_-_12428	NM_009828	Ccna2	2.82804	1.66206	1.81849	2.2901	1.15392	786.338	676.022	783.34	674.112	789.76	82.1429	24.8082	32.7225	11.2994	98.8467	36.3095	36.0046	26.0603
13_-_268697	NM_172301	Ccnb1	0.500659	0.687127	0.634058	1.47448	0.423634	473.044	604.395	589.234	603.937	598.881	60.4911	30.0512	33.2461	7.57062	64.3992	28.7784	25.3692	7.86387
9_-_12442	NM_007630	Ccnb2	0.0346366	0.050257	0.156287	0.0228849	0.237325	199.28	168.195	174.51	177.5	180.594	29.6875	19.0537	25.6545	10.8475	19.089	15.593	18.7965	8.02896
7_-_12443	NM_007631	Ccnd1	24.7473	5.05625	8.97397	23.32	11.3494	2462.86	2445.9	2437.85	2449.56	2395.98	204.688	160.486	185.864	359.548	188.207	125.951	98.952	113.966
4_+_12448	NM_009830	Ccne2	3.23717	0.519784	0.391306	0.565938	0.572729	1202.94	1296.57	1230.77	1290.95	1270.95	39.0625	8.31202	9.68586	4.29379	29.6137	7.56251	6.25507	3.30454
5_+_12452	NM_007635	Ccng2	1.67654	0.103033	0.0470753	0.357548	1.02832	1191.8	1211.25	1200.72	1210.45	1199.23	16.0714	23.913	35.8639	31.5254	8.45175	13.9263	19.2231	14.3883
13_+_66671	NM_023243	Ccnh	0.150045	0.0437611	0.0474615	0.0734806	0.0998064	275.281	236.152	203.694	250.931	272.727	66.2946	74.0409	68.3246	79.548	36.9433	42.9787	37.7447	39.5558
19_+_240665	NM_172839	Ccnj	4.39193	0	0	1.46398	0	2441.45	2434.12	2422.56	2444.32	2454.26	7.58929	4.60358	4.97382	3.50282	2.28047	1.28105	1.14476	1.34782
4_+_56036	NM_207678	Ccnl2	0.701573	0.188507	0.153469	0.20794	1.06783	633.946	631.989	633.58	640.092	631.273	39.9554	36.5729	34.0314	47.5706	74.3656	82.2728	91.2516	101.265
1_+_72949	NM_028399	Ccnt2	0.334686	0.348475	0.244329	0.489193	0.730442	1781.31	1937.38	2029.19	1816.09	1943.42	20.0893	24.6803	22.2513	23.1638	12.8057	12.0038	6.21966	5.75704
18_-_67974	NM_026484	Ccny	0.534707	0.602862	0.597697	0.661043	0.711984	1636.45	1797.58	1735.04	1960.84	1833.57	48.6607	44.5013	50.7853	58.8701	33.5336	35.1606	27.7647	20.8381
1_+_227210	NM_001097644	Ccnyl1	1.81231	0.32689	0.325572	0.96113	2.5544	1949.1	1956.49	1959.36	1973.26	1962.07	101.562	74.4246	100.262	67.4576	65.6372	52.5051	53.3107	35.5898
16_-_12469	NM_009840	Cct8	0.192235	0.341817	0.323522	0.427159	0.0522238	136.467	146.062	148.66	140.77	140.169	353.571	326.982	352.094	314.802	258.852	236.729	229.758	184.04
5_-_231874	NM_177682	Ccz1	0.577085	0.283693	0.549967	0.295273	1.10794	260.274	250.892	256.957	261.684	265.6	49.7768	38.6189	39.7906	36.7232	23.2774	26.0946	29.0289	21.4713
9_+_235505	NM_153098	Cd109	2.84456	1.76343	1.11163	1.36788	2.74957	960.567	923.115	910.593	879.991	952.873	97.3214	54.0921	60.2094	71.4124	97.6683	47.4713	30.9154	30.1625
10_+_12484	NM_009846	Cd24a	1.52425	0.519554	0.628098	0.887408	1.34853	1365.24	1366.18	1400.9	1384.91	1391.84	167.857	60.7417	88.2199	52.4294	165.499	63.4485	84.3631	44.696
17_-_12488	NM_009847	Cd2ap	0.790644	0.876564	1.12598	0.950526	0.658183	2325.46	2136.17	2652.71	2101.3	2477.11	31.25	25.9591	29.3194	22.4859	26.5009	24.7833	23.3627	9.34109
7_-_70233	NM_001285907	Cd2bp2	0.392178	0.479044	0.498671	0.399829	0.352264	1136.28	945.721	839.579	859.17	1077.92	28.7946	34.6547	24.6073	34.0113	11.4993	15.1836	13.4841	15.4269
2_-_66205	NM_025422	Cd302	0.371429	0.108333	0.0866667	0.0619048	0.379167	278.987	261.686	273.18	290.035	282.102	15.625	15.601	22.2513	18.8701	4.63092	5.64499	14.5148	17.828
7_-_70333	NM_145822	Cd3eap	0.143037	0.242614	0.169044	0.189354	0.699116	895.435	841.375	868.027	889.967	854.056	23.2143	23.6573	15.7068	16.0452	10.1258	8.93416	7.65035	5.33634
2_-_12505	NM_001177787	Cd44	0.309708	0.125227	0.127887	0.196174	0.455029	2832.38	2827.63	2839.23	2830.95	2833.08	1211.61	539.003	791.361	466.328	829.75	358.193	352.384	190.145
16_+_16423	NM_010581	Cd47	0.788614	1.64197	2.28009	1.23374	1.06002	1443.67	1945.86	1673.88	1992	2022.02	69.4196	67.2634	102.88	99.548	20.3803	21.9092	42.5602	43.1092
1_-_13136	NM_010016	Cd55	4.12549	Inf	Inf	5.17647	1.08331	905.948	907.727	887.706	1005.08	1000.52	19.6429	21.7391	47.9058	76.1582	19.3448	19.7864	47.5926	56.9061
2_+_12509	NM_001111060	Cd59a	0.208838	0.341474	0.240573	0.284355	0.428144	1021	791.165	903.634	977.057	992.079	18.9732	98.8491	110.209	132.994	9.29925	49.061	51.723	69.4585
8_+_69957	NM_027276	Cdc16	0.0189419	0.0519628	0.0561634	0.0616323	0.152109	277.344	274.723	277.817	277.015	279.131	77.2321	75.4476	71.7277	62.0339	77.5318	78.9544	77.4256	60.9446
18_-_52563	NM_178347	Cdc23	0.0448676	0.055041	0.0620651	0.07735	0.0689979	1575	1406.46	1455.47	1467.86	1520.65	30.5804	24.4246	29.3194	27.0056	29.0433	22.0473	20.6678	16.5016
18_-_12532	NM_009860	Cdc25c	NaN	0.0045364	0	0	0.0049488	2620.84	1204.85	538.522	244	481.684	10.4911	5.88235	3.40314	2.14689	4.81815	3.41341	3.329	2.45444
11_-_217232	NM_001285990	Cdc27	0.253197	0.122264	0.186667	0.325127	0.4359	2027.11	2339.17	2193.23	2227.21	2198.12	70.5357	52.4297	63.089	51.4124	57.2023	41.7141	25.9424	17.2316
10_+_216150	NM_177613	Cdc34	0.403413	0.382335	0.45968	0.512303	0.313802	178.155	166.517	160.367	157.208	158.966	107.589	143.606	117.016	108.701	75.1052	95.065	127.022	120.475
19_+_67072	NM_025950	Cdc37l1	0.212496	0.746187	0.388999	0.279922	0.227565	1247.56	1481.39	1164.52	1542.62	1366.84	16.5179	18.0307	14.3979	14.4633	10.4184	10.2546	7.85415	8.87207
10_-_71713	NM_027879	Cdc40	5.03997	33.3862	6.21111	9.55556	Inf	1494.55	1480.83	1446.61	1404.9	1459.21	26.5625	24.2967	25.6545	24.2938	14.9236	10.3295	5.22189	7.67177
1_+_226751	NM_001033285	Cdc42bpa	0.0649489	0.142392	0.202587	0.164524	0.327414	1832.17	2178.04	2369.67	2470.76	2550.23	35.0446	27.3657	28.0105	21.6949	53.2045	26.9148	15.4284	8.54521
17_-_260409	NM_026514	Cdc42ep3	0.40631	0.458591	0.26701	0.29162	0.134719	804.471	760.915	766.859	762.304	778.87	88.8393	38.1074	41.3613	31.1864	45.9963	22.7456	24.9206	24.0251
11_+_23834	NM_011799	Cdc6	0	0.0604839	0.0306585	0.00624525	0.0518836	1001.15	923.442	1088.11	794.474	1367.67	21.2054	7.16113	4.97382	3.38983	13.2719	3.44093	2.73656	1.0873
1_-_214498	NM_145991	Cdc73	0.203364	0.151458	0.157804	0.171375	0.202951	1364.64	1223.35	1254.74	1468.3	1969.68	45.0893	38.7468	41.0995	28.8136	17.9732	15.1921	8.94637	7.09268
14_-_108912	NM_001110162	Cdca2	Inf	1.0026	0.603807	0.716144	0.147441	581.846	1148.15	1027.43	1067.8	1178.85	10.4911	6.26598	3.9267	2.93785	16.6676	5.81865	3.94187	1.63664
6_+_14793	NM_013538	Cdca3	0.878577	2.29309	1.42581	1.18482	0.136773	168.117	155.631	165.118	160.212	170.417	45.9821	32.4808	30.8901	13.5593	26.4666	22.4226	30.0003	9.92256
8_-_12552	NM_009866	Cdh11	0.0688753	0.0913012	0.094805	0.0876938	0.0802098	917.022	997.012	976.466	1006.44	980.567	147.098	146.419	142.932	165.085	167.237	183.688	138.594	135.716
8_+_12554	NM_019707	Cdh13	0.124992	0.0635319	0.139789	0.158427	0.0997497	1159.62	1130.44	1124.53	1176.1	1149.91	12.7232	7.03325	7.59162	19.096	14.077	9.05749	10.7284	23.9257
15_+_320865	NM_001081299	Cdh18	0.375452	0.300362	1.20145	1.20145	Inf	418.577	448.6	340.737	517.565	353.897	10.0446	4.85934	6.02094	6.55367	9.4981	3.36443	4.45281	3.26747
18_-_12558	NM_007664	Cdh2	0.887827	0.176064	0.183564	0.425268	2.31986	1129.72	1149.93	1127.57	1151.02	1170.54	502.009	401.279	401.309	351.638	134.968	104.906	58.5418	44.2356
13_-_69562	NM_001081058	Cdk13	0.111255	0.151688	0.167585	0.180039	0.274302	1364.81	1771.55	1578.16	1671.52	1547.39	22.7679	26.2148	27.7487	26.8927	14.1732	13.5211	8.52546	6.80449
X_+_18555	NM_011049	Cdk16	0.544886	0.158312	0.186466	0.219482	0.37661	1117.63	948.662	993.248	1034.67	1092.37	29.0179	30.9463	25.1309	36.3842	51.1184	48.6462	52.9921	54.773
10_+_78334	NM_001291817	Cdk19	1.48397	0.544431	0.766562	0.833912	1.06992	3030.01	2984.2	3196.9	3346.89	3307.59	4.46429	2.68542	4.71204	5.76271	3.13086	2.57758	3.95057	3.87908
5_-_12568	NM_007668	Cdk5	0.263005	0.233481	0.203354	0.16193	0.0877215	631.849	488.75	459.418	363.818	583.248	14.2857	14.0665	14.3979	15.9322	16.4799	16.7823	19.7876	22.9794
13_-_12572	NM_009874	Cdk7	0.0677305	0.914528	0.676591	0.373981	0.0345524	626.015	601.097	871.835	740.541	1289.34	83.2589	102.046	96.8586	94.5763	13.1995	16.3762	13.5123	10.9803
8_-_70925	NM_172407	Cdkn2aip	0.237344	0.454119	1.16773	0.32437	0.411701	841.333	974.222	893.395	935.351	923.088	16.0714	10.9974	14.9215	12.7684	6.33168	5.05241	5.8983	4.29483
11_+_52626	NM_029976	Cdkn2aipnl	4.95844	1.58392	1.44782	1.43395	2.41557	1332.66	1240.53	1273.91	1253.79	1326.72	24.7768	18.2864	16.4921	17.5141	15.7643	12.1487	11.3944	8.16131
4_-_12579	NM_007670	Cdkn2b	0.149058	0.0541707	0.0967342	0.110465	0.237242	891.022	898.882	1145.7	1142.75	1163.51	83.2589	108.312	127.487	139.887	27.5586	37.4626	43.198	63.0936
14_+_72391	NM_028222	Cdkn3	Inf	0.447059	0.447059	0.223529	0	50.5385	44.75	55.5	61.52	48.3333	5.35714	7.67263	6.5445	4.74576	6.16841	5.02539	8.57089	1.65117
18_-_12583	NM_033037	Cdo1	1.00275	0.332434	0.463817	0.552475	1.06986	655.872	633.107	625.356	653.458	637.087	27.2321	19.0537	18.8482	40.113	15.3296	9.55174	13.5462	22.9627
9_+_57810	NM_021339	Cdon	5.11865	1.80934	2.48058	4.92178	3.71026	3110.29	3147	3116.49	3121.18	3065.5	9.59821	12.2762	10.2094	13.7853	7.97845	8.30202	6.35571	7.65482
8_-_75796	NM_029441	Cdyl2	0.247441	0.165721	0.210538	0.290543	0.21232	3664.31	3282.21	5182.7	4964.25	4063.16	5.35714	4.21995	5.2356	3.61582	4.16623	1.79934	1.25371	1.14031
2_+_12608	NM_009883	Cebpb	1.52684	0.305085	0.707592	0.565883	12.1873	487.586	492.74	489.521	493.347	491.274	72.9911	72.6343	150	60.678	10.291	18.3187	53.6211	117.568
7_-_12611	NM_009884	Cebpg	0.14906	0.292146	0.145008	0.176161	0.219642	1427.78	1850.87	1366.32	1702.32	1589.91	33.4821	41.688	29.5812	33.4463	9.51959	14.7157	12.7365	9.04484
17_-_12607	NM_001024806	Cebpz	1.09869	Inf	0.649227	0.41201	1.1736	150.162	169.15	176.643	172.983	165.125	97.9911	91.688	93.4555	70.6215	17.3036	16.4888	12.9463	11.6289
1_-_108000	NM_001081363	Cenpf	1.18094	0.215839	0.226137	0.250722	1.21001	1194.78	758.667	936.773	857.724	1165.32	11.3839	8.4399	7.59162	4.63277	8.10147	3.70967	2.54481	1.96155
10_+_216274	NM_146009	Cep290	0.0680412	0	0.136082	0.0453608	0.0800485	370.929	425.879	309.758	382.333	325.31	7.36607	4.21995	5.49738	4.74576	3.22397	2.25957	1.71598	1.08126
1_-_74081	NM_001039184	Cep350	Inf	8.55693	1.07983	Inf	0.752328	2937.53	3118.63	2972.03	2438.05	3105.14	18.3036	12.4041	10.4712	13.1073	17.7445	11.4137	10.0381	8.06168
9_-_28135	NM_001081122	Cep63	0.131075	0	0.229381	0.141158	0.166823	204.925	204.532	196.518	211.286	205.983	10.4911	10.8696	10.9948	13.2203	8.54487	6.24495	5.69784	7.88691
18_-_225659	NM_001081073	Cep76	Inf	4.89152	6.23669	3.17949	Inf	1251.95	1334.98	1520.56	1691.05	1519.2	9.375	5.49872	5.2356	6.21469	10.7955	4.7808	4.21042	2.43208
15_-_223753	NM_145475	Cerk	1.29739	0.561964	0.450319	0.817118	1.42872	2408.65	2099.7	2220.87	2172.05	2370.01	8.25893	6.01023	4.97382	9.60452	4.84251	4.23574	3.62137	3.78196
X_-_26370	NM_019405	Cetn2	0.121688	0.0548701	0	0.0143026	0.0900853	534.411	514.576	524.059	520.265	521.889	13.1696	24.0409	26.7016	18.3051	5.68419	9.71672	9.75911	10.3269
13_+_12626	NM_007684	Cetn3	0.13507	0.139462	0.0907611	0.0874304	0.0754845	228.184	232.327	227.671	229.196	229.721	150.893	119.054	120.157	85.0847	37.1142	41.818	47.8912	52.8623
3_-_207175	NM_145825	Cetn4	0.242821	0.440559	0.402797	0.413125	0.284461	350.262	464	341.062	407.8	386.725	2.23214	4.09207	5.2356	4.51977	6.39165	9.8386	21.4293	20.906
12_-_12632	NM_007688	Cfl2	0.0866962	0.0530397	0.0617102	0.0974581	0.088264	1213.39	1257.12	1209.95	1275.92	1225.62	150.223	125.448	149.738	116.158	121.331	88.1624	87.9327	70.684
16_+_106143	NM_178647	Cggbp1	2.89901	1.20396	2.76332	3.65287	2.05478	2506.89	2501.01	2664.09	2857.74	2890.9	95.5357	77.3657	76.9634	67.3446	72.4451	61.0045	54.639	31.5374
11_-_68044	NM_001290667	Chac2	1.47079	0.384114	0.59751	0.632658	0.810907	596.273	621.295	621.903	636.451	614.84	13.6161	7.92839	13.3508	14.1243	3.6319	4.32188	4.24974	6.37248
17_+_27221	NM_013733	Chaf1a	0.0103635	0.154514	0.152397	0.0805869	0.0778968	958.943	783.459	945.651	476	1016	24.7768	13.9386	8.63874	8.92655	16.0115	6.97074	7.22619	3.66964
6_-_66075	NM_025336	Chchd3	0.556254	0.203832	0.21582	0.30525	0.530897	624.743	637.727	626.357	651.492	628.97	123.438	148.593	132.984	107.684	48.0138	54.3912	55.8542	42.5475
6_-_72170	NM_133928	Chchd4	1.05395	0.983682	0.642512	2.22287	1.14976	568.368	610.455	666.17	626.1	610.099	22.0982	14.3223	13.089	9.15254	10.8767	7.94067	6.38313	3.50111
2_+_66170	NM_025395	Chchd5	1.18266	0.572853	0.620182	0.612634	0.422102	619.585	587.683	542.967	558.318	520.333	9.15179	7.80051	11.5183	14.2373	6.20537	7.00162	6.17151	9.26169
17_+_12648	NM_007690	Chd1	0.128898	0.112745	0.117125	0.102369	0.126222	1497	1559.47	1485	1537.91	1587.11	54.2411	23.913	31.6754	24.7458	28.7106	15.5942	19.9687	13.7182
2_-_71389	NM_173368	Chd6	0.523537	0.173817	0.352392	0.462262	0.761266	1736.42	1800.02	1801.96	1831.09	1804.42	9.375	9.20716	11.2565	12.8814	10.4979	11.048	8.22489	9.91968
8_+_109151	NM_177224	Chd9	1.65169	1.59576	1.36311	2.06568	1.41696	2202.56	2324.98	2287.44	2531.39	2485.39	12.2768	7.289	7.32984	10.9605	19.0033	14.8283	12.4609	15.2097
9_-_12649	NM_007691	Chek1	3.60789	0.551205	0.304113	0.209983	0.57517	830.278	820.6	835.16	857	833.116	14.5089	6.39386	6.80628	4.85876	7.02691	4.59158	4.44864	1.28333
5_-_74277	NM_028850	Chic2	0.293013	0.37385	0.514456	0.322772	1.09547	461.294	444.779	484.34	459.099	563.392	54.4643	62.7877	55.4974	44.9718	16.6461	21.9699	24.6544	28.9502
7_-_68038	NM_001142681	Chid1	0.075853	0.113929	0.145589	0.0941145	0.124618	980.27	961.973	842.221	941.794	842.56	16.7411	17.3913	17.801	22.5989	18.2586	14.6579	17.0925	19.0757
16_-_68942	NM_026879	Chmp2b	2.92646	1.38931	1.35822	1.96016	3.17817	930.432	936.736	939.958	950.633	956.267	127.009	147.698	128.534	150.847	39.6254	41.7045	44.2634	47.4633
6_+_66700	NM_025783	Chmp3	0.797727	1.90365	1.7472	1.26077	0.500096	1065.49	1086.57	970.758	1021.88	985.712	52.0089	54.8593	59.6859	66.7797	54.6804	50.8215	52.5659	71.5387
2_-_108699	NM_001166604	Chn1	Inf	Inf	Inf	Inf	6.92037	432.462	615.875	553.2	567.214	461.963	1.78571	3.19693	3.66492	3.05085	5.87505	5.49603	5.39882	7.17039
9_+_66917	NM_025844	Chordc1	0.0214764	0.0919385	0.0826288	0.0576659	0.0540362	1224.23	1411.66	1363.75	1235.95	1336.37	62.9464	69.9488	53.1414	44.2938	47.4638	44.2879	36.7896	25.4007
2_+_76969	NM_023850	Chst1	0.157065	0	0	0.0623139	0.123288	857.8	865.25	871.258	854.607	848.552	11.6071	3.96419	7.32984	6.55367	3.27601	1.26165	1.98887	2.81426
5_+_59031	NM_021528	Chst12	0.0750441	0.0545746	0.0841584	0.0510204	0.310116	349.982	353.8	354.934	356.385	352.727	23.4375	28.9003	30.6283	25.6497	69.3432	55.2746	73.3179	70.9398
9_-_54371	NM_018763	Chst2	0.0249709	0.0395355	0.0507434	0.0370732	0.0456098	1118.16	1554.94	1586.51	1409.58	1329.38	95.5357	42.711	35.8639	41.2429	28.0774	10.3555	8.28101	6.38862
2_-_26371	NM_025296	Ciao1	0.153175	0.257333	0.882286	0.11697	1.66194	225.211	231	226.979	228.523	224.517	23.6607	24.8082	22.5131	19.435	23.6413	33.8974	30.9176	27.7335
2_-_66935	NM_025854	Cir1	0.448029	0.264835	0.573477	0.355436	0.73875	489.903	577.713	551.011	485.345	549.39	19.4196	23.5294	22.7749	32.7684	2.50493	2.78081	3.40589	7.94124
10_-_52637	NM_134007	Cisd1	0.109105	0.0342215	0.0821988	0.0919329	0.253149	344.978	340.893	343.185	350	353.96	74.7768	47.5703	40.3141	47.6836	32.3242	22.0553	21.5947	21.6564
3_-_67006	NM_025902	Cisd2	0.323011	0.243577	0.275859	0.384582	0.434377	887.527	876.807	906.711	1006.24	1009.34	70.5357	67.6471	69.6335	54.1243	8.1757	8.40117	12.5173	9.12603
8_-_80986	NM_001004140	Ckap2	0.0564872	0.0755608	0.0718294	0.0342246	0.0121212	327.739	329.247	315.88	324.296	316.463	37.9464	25.5754	28.2723	13.8983	42.5653	26.593	27.6187	12.1276
1_+_76707	NM_001081276	Clasp1	3.30729	1.82218	1.59786	1.85231	3.40056	2293.05	2161.69	2223.25	2212.79	2312.52	25.2232	23.5294	24.8691	22.7119	23.9134	15.8872	14.3274	13.9264
3_-_12722	NM_009899	Clca1	0.214122	0	0.0642365	0.769147	0.925761	407.225	426.615	380.198	376.534	386	14.5089	27.7494	23.0366	23.1638	5.50983	10.4305	4.68382	4.16744
5_-_56430	NM_001291229	Clip1	0.667714	0.699225	0.586893	0.895522	0.835515	1041.72	1098.16	1141.73	1208.57	1100.81	27.4554	34.5269	32.9843	35.9322	35.9951	29.6616	40.9159	44.8374
7_+_76686	NM_001081114	Clip3	0.93443	0.404131	0.432269	0.562087	0.952787	1382.66	1237.38	1368.26	1287.03	1367.56	24.3304	31.7136	30.6283	31.8644	20.489	19.0731	15.2006	16.3718
9_-_102414	NM_007713	Clk3	0.151379	0.030228	0.0305657	0.0427443	0.551724	253.264	258.92	251.537	253.778	252.674	16.7411	25.9591	18.8482	25.3107	29.4202	35.5084	37.0194	26.6315
11_+_12750	NM_007714	Clk4	5.625	0.857143	2.08333	3.375	5.83333	315.348	324.418	317.89	312.429	317.843	21.875	26.7263	27.4869	24.5198	19.632	24.1801	20.3426	15.2384
8_+_26889	NM_012000	Cln8	0.0346309	0.284886	0.246061	0.188071	0.116565	1472.19	1682.11	1670.47	1600.7	1513.95	10.0446	10.9974	7.8534	9.03955	7.29928	9.79877	6.09154	6.62713
5_-_12753	NM_007715	Clock	0.49087	0.123954	0.175424	0.331977	0.312531	4805.93	4713.34	4872.03	4939.33	4865.79	27.2321	18.1586	21.9895	15.2542	20.2798	11.0426	3.78331	2.64748
7_+_20480	NM_009191	Clpb	0.00798729	0.0761455	0.0634546	0.0393856	0.0443738	300.038	320.125	339.874	270.544	462.557	10.7143	15.2174	20.6806	19.887	12.771	13.394	12.8762	11.9757
9_+_270166	NM_011802	Clpx	0.326146	0.421154	0.467949	0.806808	0.467949	377.926	392.549	380.714	407.088	371.532	34.1518	36.1893	32.7225	31.4124	10.3595	10.1586	8.49393	8.13611
13_-_74325	NM_028870	Cltb	0.0482369	0.0904683	0.0966255	0.0603685	0.0673961	542.241	560.952	513.34	504.956	595.81	46.875	42.8389	35.8639	45.0847	51.6129	39.4503	45.9517	61.8732
4_-_66588	NM_025647	Cmpk1	0.151043	0.220583	0.143105	0.17015	0.178584	675.111	814.724	790.959	832.361	765.578	149.554	89.5141	115.969	84.9718	59.4013	53.2929	67.9673	66.3494
8_-_97487	NM_153582	Cmtm4	0.639038	1.08	1.21586	1.26119	1.63537	4208.65	4115.69	4037.16	3852.04	4588.18	22.9911	29.4118	28.0105	30.8475	28.7214	26.2135	22.7021	18.9001
6_-_12785	NM_013493	Cnbp	0.4013	0.127289	0.150769	0.139939	1.10894	901.01	896.49	901.893	900.302	903.381	465.625	404.348	337.696	324.746	311.8	253.116	228.307	163.288
10_+_12798	NM_007725	Cnn2	1.80526	1.13685	1.21918	1.19208	1.25061	1208.16	1122.45	1015.32	1017.98	1029.73	16.7411	12.9156	13.3508	10.5085	273.56	219.303	223.418	187.448
3_+_71994	NM_028044	Cnn3	0.50679	0.224905	0.233733	0.338491	0.679956	637.451	653.069	647.343	663.01	668.102	291.741	291.816	265.969	215.706	253.834	265.774	248.287	209.657
19_+_94219	NM_033569	Cnnm2	1.32842	0.607774	0.536271	0.820495	1.54586	378.5	479.6	449.579	466.235	423.556	1.11607	2.42967	4.45026	5.08475	1.80036	2.84942	2.69196	4.21927
11_-_104625	NM_001290741	Cnot6	0.846773	0.886371	0.805599	0.827199	0.613097	2917.58	2934.74	3042.22	2885.15	2727.04	44.8661	32.4808	32.4607	29.3785	33.8243	23.1936	16.2783	10.6316
5_-_231464	NM_001285514	Cnot6l	0.190573	0.27879	0.266383	0.267259	0.265946	2948.34	3773.89	3436.6	3156.03	3216.79	23.8839	17.0077	19.1099	18.6441	17.7821	11.9082	11.0485	9.58482
11_+_69125	NM_026949	Cnot8	0.549774	0.274795	0.270242	0.233297	0.281308	884.667	859.724	820.928	921.667	859.196	50.2232	49.6164	53.4031	60.452	21.0886	23.3906	29.7533	37.4453
11_+_12799	NM_001146318	Cnp	7.81973	1.35191	1.32819	2.13175	2.84897	847.636	896.826	830.964	859.545	857.312	5.13393	7.03325	5.75916	10.8475	4.82976	4.47787	6.75548	8.63577
17_-_72029	NM_028065	Cnpy3	0.8525	0.666347	0.741304	0.700429	1.25644	900.92	885.3	890.326	865.578	902.773	8.92857	11.3811	11.7801	15.9322	12.947	14.3139	18.4547	16.7886
5_+_66455	NM_178612	Cnpy4	0.164369	0.085453	0.0388423	0.0453814	0.10684	809.14	779.843	752.049	747.277	764.521	42.6339	34.2711	34.0314	44.0678	18.2521	14.4601	15.6726	16.6915
2_-_319876	NM_177025	Cobll1	0.980883	0.115887	0.173097	0.135815	0.625072	1103.25	1088.01	1089.59	1000.62	1080.86	46.6518	20.0767	14.6597	13.7853	16.1866	5.06061	2.84041	2.06746
12_+_12810	NM_007728	Coch	1.04601	0.656319	0.603814	0.420044	0.918847	558.829	574.953	496.088	523.031	483.299	19.1964	14.4501	16.7539	17.7401	17.3751	8.63316	12.297	9.27166
11_+_16834	NM_013581	Cog1	0.164179	0.0703625	0.191542	0.0364842	0.0434592	79.3434	77.45	80.374	93.75	80.3293	17.8571	16.7519	12.5654	18.8701	15.2506	17.2964	15.2496	9.40929
3_-_67542	NM_026225	Cog6	0.384146	0.364613	0.236398	0.199187	2.21016	919.75	916.154	918.29	915.545	919.32	11.6071	15.8568	20.1571	19.774	11.9264	11.8533	9.26203	10.059
3_+_12814	NM_007729	Col11a1	0.218626	0.190786	0.193308	0.218961	0.352277	813.565	947.344	906.472	935.154	967.018	62.9464	160.102	140.838	146.893	17.8659	40.8537	24.5993	20.4387
9_-_12816	NM_001290308	Col12a1	2.55829	1.09357	1.52156	2.25433	3.00812	1980.75	2032.3	2047.44	2065.71	2056.18	495.089	265.729	394.241	391.864	300.58	163.513	147.705	169.625
10_-_12822	NM_009929	Col18a1	3.3161	1.88795	2.13071	1.08679	1.61625	692.542	675.929	647.713	776.31	731.576	18.75	12.9156	7.59162	14.1243	11.6515	6.18725	2.63334	4.29787
6_+_12843	NM_007743	Col1a2	0.568692	0.648498	0.844097	0.787433	0.383072	547.626	560.99	562.085	594.005	562.071	1073.21	1633.38	1781.94	2061.81	964.996	1028.45	838.635	994.529
8_-_12826	NM_009931	Col4a1	0.222972	0.148594	0.160052	0.213769	0.257498	862.669	961.533	926.109	942.191	905.096	257.589	371.867	299.476	241.356	180.528	189.322	117.421	89.0135
X_+_12830	NM_007736	Col4a5	1.01621	0.209994	0.264477	0.39459	0.458224	986.38	1035.41	1022.79	979.071	1011.64	35.2679	21.6113	25.6545	26.1017	16.0007	15.101	13.3902	17.9362
2_+_12831	NM_015734	Col5a1	0.206944	0.153649	0.180403	0.167976	0.178742	1181.88	1290.72	1354.34	1274.72	1238.66	620.089	722.634	705.236	890.96	269.927	252.939	273.688	323.273
16_-_12837	NM_007739	Col8a1	0.483013	1.00321	1.47617	1.52101	0.878308	2312.91	2455.92	2435.61	2400.55	2388.57	161.83	229.923	254.45	359.435	70.089	110.682	125.633	171.694
14_-_66200	NM_001168592	Commd6	0.324931	0.158855	0.203175	0.225741	0.288827	436.858	451.13	431.026	483.575	472.079	41.0714	45.0128	48.6911	55.4802	15.6464	19.8286	30.3121	26.0021
2_-_99311	NM_001195390	Commd7	0.133189	0.0643537	0.0535431	0.0973029	0.939603	596.428	601.312	594.792	597.259	595.644	32.1429	33.8875	36.3874	41.2429	19.1668	25.6543	30.6805	34.0111
5_-_27784	NM_178599	Commd8	0.152036	0.848005	0.419023	0.189685	0.178527	1119.14	1164.64	1180.32	1152.51	1198.23	56.0268	65.8568	64.1361	63.0508	11.7347	12.0287	13.0799	9.70501
14_-_69156	NM_026965	Comtd1	0.529266	0.0366591	0.410582	0.274943	0.0530925	100.186	105.083	103.592	102.446	102.333	13.3929	21.6113	17.0157	18.6441	13.4491	16.2986	27.9945	39.0266
6_-_54160	NM_017478	Copg2	0.0492348	0.181067	0.111962	0.153413	0.167603	867.783	616.6	572.787	731	819.759	5.58036	6.01023	3.9267	9.83051	16.1938	19.1767	17.0591	17.7381
2_-_12848	NM_001285513	Cops2	0.52082	0.495979	0.600534	0.486622	0.839416	1307.42	1350.6	1290.24	1346.25	1320.98	137.054	131.202	145.812	128.023	58.776	59.8183	52.887	40.9021
1_+_26895	NM_172974	Cops7b	0.0533367	0.00649317	0.00771399	0.0179931	0.124452	1227.3	1234.33	1245.98	1210.29	1256.69	7.36607	6.13811	8.11518	8.47458	14.7095	12.0918	12.8462	13.2403
1_+_108679	NM_133805	Cops8	0.310604	0.117941	0.115702	0.232095	0.632531	881.052	887.81	877.091	884.611	892.943	102.455	101.535	95.5497	75.1412	63.6978	62.5931	67.1259	58.9334
1_+_67876	NM_001039710	Coq10b	0.425737	0.154915	0.252726	0.384598	0.412682	671.943	742.9	737.26	733.71	720.785	87.0536	63.9386	58.6387	53.6723	82.5071	72.8017	68.4609	53.4858
4_+_230027	NM_172687	Coq3	0.193846	2.25	0.436154	0.321429	0.0310345	433.803	434.814	393.982	491.481	370.395	22.7679	21.4834	20.6806	18.8701	6.56008	5.4618	4.66981	7.18317
2_+_227683	NM_178693	Coq4	0.403738	0.336449	0.427488	0.245754	0.656075	571.556	600	689.208	490.8	518.4	5.13393	6.77749	5.2356	5.08475	4.64265	4.36868	3.75774	3.434
5_+_52064	NM_026504	Coq5	1.96138	1.0833	0.6591	1.10244	0.585866	812.253	772.633	860.089	836.88	866.888	10.9375	11.509	13.089	10.0565	8.21261	7.77713	7.8771	8.79686
16_-_78885	NM_030205	Coro7	0.0533647	0.0395837	0.0758341	0.138081	0.261154	1778.06	1536.73	1742.67	1459.5	1666.14	2.45536	3.83632	3.14136	4.18079	7.66483	5.37131	4.72031	5.8388
11_+_69802	NM_199008	Cox11	0.273033	0.472557	0.40955	0.840102	1.44918	537.134	662.716	888.324	566.706	495.742	21.2054	21.7391	17.801	17.9661	4.5443	4.05683	2.42885	2.04676
5_-_68033	NM_197980	Cox19	0.0994877	0.0375728	0.0741751	0.0716376	0.11214	518.4	548.108	536.549	529.886	512.08	16.5179	19.5652	18.3246	16.9492	1.56645	1.16086	2.70266	1.07526
11_-_12874	NM_007754	Cpd	5.17522	1.26409	1.44717	2.5039	4.1809	3537.38	3640.91	3510.73	3578.47	3557.46	60.0446	40.4092	56.5445	47.3446	41.0627	41.6152	32.4705	33.3302
5_+_231207	NM_001177379	Cpeb2	2.26883	0.657013	0.690867	1.93092	17.1676	3389.51	3365.39	3529.94	3249.69	3616.41	22.9911	18.2864	17.5393	19.887	21.7096	17.7206	16.8306	13.6705
11_+_67579	NM_001290678	Cpeb4	1.34222	0.135938	0.18011	0.310404	1.32763	3998.8	4034.55	4039.45	4084.36	4047.94	22.7679	18.2864	20.4188	15.8192	14.3543	16.4713	11.4778	6.86733
13_+_12890	NM_009946	Cplx2	2.57218	6.56133	4.84146	3.02489	4.92514	765.221	1578.31	2472.16	1378.4	2061.92	14.9554	25.7033	26.7016	18.7571	3.10475	5.12868	3.04941	5.82645
8_+_234577	NM_153507	Cpne2	0.0818182	0.0226095	0.0277939	0.0401562	0.153649	395.75	371.25	370.804	364.958	395.389	23.2143	18.9258	30.8901	20.339	21.7093	16.012	20.0128	21.9374
4_-_70568	NM_027769	Cpne3	1.52074	0.942309	1.27733	1.89599	1.8472	3518.69	3625.54	3400.9	3747.78	3735.82	36.1607	34.9105	30.3665	28.7006	34.5774	25.1055	16.4076	11.4187
12_+_51786	NM_016856	Cpsf2	0.241865	0.32099	0.327964	0.279313	0.463766	738.745	840.945	861.114	867.886	823.672	68.5268	59.2072	48.4293	45.4237	19.2011	14.7471	9.51693	7.22048
4_+_71957	NM_028020	Cpsf3l	0.292401	0.23617	0.209929	0.365502	0.314894	246.014	234.447	234.705	266.636	261.17	16.9643	16.4962	20.1571	17.2881	16.264	15.1464	18.256	15.8653
17_-_57354	NM_020608	Cramp1l	0.744498	0	0	0	3.64688	3524.35	3518.34	3534.56	3518.56	3526.18	11.8304	12.0205	8.37696	8.70056	6.87866	4.25782	3.6986	3.15502
2_-_12908	NM_007760	Crat	0.0125163	0.0150764	0.0141744	0.0194155	0.0260142	708.093	1238.91	779.429	802.667	844.96	4.91071	5.37084	4.71204	5.64972	14.7578	13.864	9.96944	9.85898
6_-_58799	NM_175357	Crbn	0.178804	0.657369	0.498427	0.316068	0.254626	889.435	871.925	923.173	829.571	948.747	20.7589	25.1918	29.3194	28.5876	14.1038	16.5919	14.3463	11.9973
1_+_12912	NM_001037726	Creb1	0.213778	0.415945	0.240943	0.185445	0.321966	3715.43	3718	3399.29	3667.74	4263.36	25.8929	19.9488	20.4188	18.1921	9.63319	8.39066	4.82172	3.79516
4_+_12913	NM_013497	Creb3	3.13669	1.50246	0.884751	2.02078	1.65548	153.957	164.707	175.118	170.2	179.656	38.8393	53.9642	48.4293	52.2034	43.9875	59.4894	75.6043	60.4937
16_-_12914	NM_001025432	Crebbp	0.396155	0.799301	0.640942	0.534421	0.46756	1236.07	1305.79	1308.72	1429.31	1303.96	56.4732	56.0102	50.5236	57.6271	17.5954	14.0303	9.81912	16.8129
1_+_433375	NM_011804	Creg1	0.383592	0.614767	0.856895	1.30777	0.698399	905.067	612.046	717.106	697.9	894.369	19.4196	36.1893	28.7958	43.8418	8.23846	15.5016	11.8859	14.4316
17_+_50766	NM_015800	Crim1	3.07507	0.410414	0.549924	1.10532	1.50715	1847.5	2111.3	2068.6	2095.68	2061.42	198.884	97.8261	101.047	63.9548	93.0903	45.3377	39.0423	26.9756
17_+_56724	NM_019936	Cript	2.78093	2.57631	2.10409	3.0617	2.03618	511.208	462.881	523.509	485.582	508.412	35.4911	50.2558	54.4503	56.2712	39.5631	42.2748	51.729	41.8581
2_+_66586	NM_001024385	Crls1	0.284633	0.105911	0.184543	0.288066	0.34245	340.945	298.504	386.094	369.527	375.874	29.6875	34.1432	33.7696	27.9096	14.508	20.7907	14.9313	19.9849
2_-_66877	NM_025820	Crnkl1	1.34986	Inf	Inf	0.404959	3.10468	153.798	146.037	154.933	150.9	152.88	23.8839	28.7724	28.7958	31.0734	7.57487	10.3651	10.2737	9.70289
5_-_74114	NM_023733	Crot	0.795215	0.364723	0.194655	0.304908	1.0992	780.243	782.112	787.372	774.474	780.718	21.875	16.4962	24.8691	36.8362	7.83549	9.38655	11.2115	12.5242
16_-_66609	NM_133679	Cryzl1	2.33266	1.84962	0.853246	0.96753	0.989278	324.365	290.711	334.067	335.862	329.986	16.9643	19.1816	17.0157	16.2712	12.4657	16.1084	15.9043	14.4031
10_+_12974	NM_026444	Cs	1.69346	3.41783	4.21765	5.02245	2.22919	1092.38	1170.2	1077.91	1090.14	1111.16	161.384	142.455	145.026	124.859	153.818	126.832	90.0929	67.365
3_+_229663	NM_001161854	Csde1	0.973198	0.172263	0.192794	0.314956	1.06577	960.745	963.232	965.379	964.657	1007.4	410.268	402.046	442.932	433.559	217.23	201.125	155.971	117.149
2_+_110750	NM_023565	Cse1l	1.63194	0.190586	0.177618	0.286836	0.623071	506.208	507.54	502.626	509.319	506.87	80.5804	58.8235	49.2147	36.3842	88.976	47.4595	28.65	30.1822
8_-_234356	NM_001252623	Csgalnact1	1.67185	0.423602	0.467748	1.04784	1.58349	1598.22	1553.68	1566.15	1566.92	1574.02	11.1607	41.0486	98.6911	113.333	7.67461	24.1436	37.2661	37.4454
6_-_78752	NM_030165	Csgalnact2	2.00689	0.320144	0.395	0.694886	1.08379	1616.68	1606.84	1615.97	1635.32	1622.35	28.7946	32.9923	31.6754	41.0169	15.876	17.587	18.7632	12.703
9_-_12988	NM_007783	Csk	0.942951	0.544075	0.5217	0.700901	1.03572	612.465	629.565	611.295	610.19	550.838	43.0804	39.8977	38.4817	30.7345	25.501	24.5963	27.7691	26.6236
18_+_93687	NM_146087	Csnk1a1	0.687277	1.13339	1.1203	1.07282	0.881424	1871.01	1809.72	1885.46	1954.79	1865.14	319.196	282.353	286.911	272.542	134.827	147.117	152.98	123.235
18_+_70425	NM_152809	Csnk1g3	0.0879876	0.109937	0.0869233	0.0722202	0.0728954	617.584	601.308	643.827	697.678	650.086	43.5268	31.8414	38.2199	38.0791	22.6026	19.3227	15.5673	13.3121
2_+_12995	NM_007788	Csnk2a1	0.56928	0.10246	0.148136	0.289822	0.71864	2201.11	2387.05	2426.37	2453.13	2455.07	43.0804	39.6419	54.9738	40.339	78.8616	75.3883	66.851	55.8687
2_+_67337	NM_024199	Cstf1	0.31975	0.447438	0.3466	0.289358	0.307819	600.327	594.577	528.939	711.447	722.5	15.8482	12.6598	9.94764	11.7514	17.6886	13.4202	9.37292	8.35538
12_+_217615	NM_001165254	Ctage5	0.33285	0.194162	0.0896134	0.151015	1.06789	471.766	354.616	398.798	387.764	447.68	35.4911	37.9795	41.0995	33.2203	26.2241	30.4209	29.4628	20.6123
7_-_13017	NM_001170744	Ctbp2	1.80382	1.73269	1.98505	1.97989	2.49708	579.467	667.8	653.169	653.292	602.381	64.7321	44.6292	54.712	33.7853	60.2483	39.1147	39.7988	36.5116
3_+_74245	NM_028836	Ctbs	0.597848	0.664275	0.270139	0.506114	0.464993	1682.51	1629.75	1127.83	1479.48	1097.6	7.14286	6.90537	7.06806	10.6215	3.68587	4.1023	4.88656	3.51589
8_+_13018	NM_181322	Ctcf	0.882107	0.39137	0.337764	0.290266	0.879253	1247.74	1229.34	1218.75	1263.32	1254.94	33.7054	27.11	29.0576	25.1977	15.3736	12.4335	9.39483	8.70725
11_+_67181	NM_026017	Ctdnep1	2.43786	0.812216	1.35125	2.08615	1.6849	472.565	484.738	473.56	487.721	485.425	61.3839	59.335	58.1152	62.7119	386.105	564.764	624.85	720
2_+_329506	NM_212450	Ctdspl2	0.5821	0.361422	0.309027	0.473057	0.541285	3104.33	3636.9	3825.98	3138.45	3524.76	25.2232	13.6829	13.8743	14.0113	13.8199	6.45783	4.61713	3.53853
3_-_107869	NM_145953	Cth	1.81459	0	0.192456	0.162848	0.907295	531.214	532.292	536.567	539.833	532.785	5.35714	20.0767	20.4188	12.0904	2.5194	8.12059	8.90416	5.23251
4_-_54366	NM_018761	Ctnnal1	1.61127	0.198006	0.529154	0.548052	1.48659	1255.45	1310.38	1228.23	1220.21	1281	7.58929	7.80051	10.9948	14.6893	3.75039	4.1429	5.86739	4.22373
14_+_13030	NM_007798	Ctsb	0.0109688	0.0281112	0.0255571	0.0195954	0.020643	914.894	908.184	894.955	907.904	944.416	187.723	219.309	298.429	440.226	136.771	118.983	135.248	156.873
7_+_13032	NM_009982	Ctsc	0.334534	0.401306	0.225995	0.188702	0.191264	608.323	671.733	644.541	614.329	627.256	10.0446	12.532	22.2513	25.6497	10.0951	14.4519	29.1327	22.662
19_+_56464	NM_019861	Ctsf	0.547493	0.223129	0.400488	0.440537	1.31234	423.125	393.714	438.824	432.444	423.302	1.5625	2.17391	2.35602	4.85876	3.67053	6.71624	10.7565	21.6553
3_+_229445	NM_177662	Ctso	1.42952	1.55728	1.49101	1.82433	2.61715	1234.91	1314	1305.62	1258.95	1303.55	4.24107	8.82353	10.9948	18.7571	2.07717	5.54084	5.04332	7.22456
3_-_80281	NM_001163333	Cttnbp2nl	1.68972	1.4489	1.789	2.15023	2.86021	2608.36	2617.62	2605.28	2591.02	2644.68	113.17	87.8517	80.8901	77.1751	15.3326	13.5475	8.23887	6.82501
6_+_26965	NM_012042	Cul1	0.0712878	0.0351699	0.031042	0.0392012	0.114218	438.684	435.087	438.382	435.591	441.607	71.875	58.9514	51.8325	47.4576	53.3681	47.6188	41.8521	32.2313
18_+_71745	NM_029402	Cul2	0.292882	0.105263	0.0603914	0.16704	1.08704	421.997	425.062	421.509	427.785	421.547	32.1429	27.3657	28.0105	27.4576	28.6616	24.7739	22.2375	15.7089
1_-_26554	NM_016716	Cul3	0.0575874	0.215243	0.210477	0.10638	0.161245	400.875	425.247	415.865	445.518	459.567	116.518	90.7928	89.5288	79.322	61.3829	53.9215	49.0741	33.6229
X_-_72584	NM_028288	Cul4b	0.151566	0.617089	0.383343	0.411392	0.498001	177.071	162.54	179.662	160.237	187.561	50.4464	60.9974	54.1885	49.9435	52.3862	52.3895	45.3937	38.4507
9_-_75717	NM_001161618	Cul5	0.226369	0.0975729	0.137388	0.166885	0.139439	1951.55	1748.63	1825.17	1838.15	2017.32	43.0804	36.445	37.1728	34.2373	28.312	28.5389	23.5219	22.189
9_+_66070	NM_023153	Cwc15	0.940333	1.73819	0.607714	0.869096	0.242873	84.2292	91.6014	98.0718	95.5736	99.0061	344.42	304.731	346.859	297.74	40.5723	49.3505	79.1703	91.1719
11_-_67480	NM_026186	Cwc25	0.711774	0.317182	0.555268	0.756353	0.713094	1675.19	1524.79	1707.27	1604.96	1659.23	9.59821	9.46292	6.28272	10.2825	7.79626	9.01433	9.14973	8.14467
13_-_67285	NM_026072	Cwc27	0.0969112	0.814054	0.150751	0.376877	0.0656495	261.424	263.909	281.087	271.621	267.368	14.7321	17.6471	15.1832	14.1243	5.72687	8.48283	8.55779	10.7769
19_-_72502	NM_001081077	Cwf19l1	0.167711	0.0510424	0.113785	0.149415	0.265871	730.438	647.25	715.203	760.688	684.443	11.6071	8.82353	4.18848	6.89266	5.08129	2.19162	2.60934	1.97155
9_+_244672	NM_027545	Cwf19l2	6.96598	1.96865	1.58424	5.24973	2.07681	1093.85	1159.52	1142.25	1146.86	1146.56	6.02679	5.11509	7.59162	8.70056	4.45052	4.09498	3.91378	4.11154
13_-_57266	NM_019568	Cxcl14	8.09429	5.67158	3.9269	4.73077	2.99774	684.994	636.134	758.527	732.66	765.803	46.6518	24.0409	80.8901	81.5819	31.1725	17.2638	80.6846	92.0806
5_+_20311	NM_009141	Cxcl5	1.82488	1.09691	1.07324	1.08028	1.38462	1063.51	1073.65	1076.82	1071.46	1065.91	129.911	41.8159	238.482	231.864	32.1497	10.8777	80.1808	79.4144
8_+_66427	NM_025558	Cyb5b	0.876867	0.467433	0.591466	0.727685	1.02337	3079.68	2692.24	2927.81	2871.63	3009.28	65.625	105.499	79.0576	64.9718	68.859	87.0651	51.4716	31.5779
9_+_266690	NM_024195	Cyb5r4	1.55817	1.10256	1.05245	0.530646	1.11436	448.056	447.488	436.615	415.494	426.624	19.1964	21.6113	21.7277	23.1638	22.0542	21.7216	21.5485	13.3552
4_+_230582	NM_175471	Cyb5rl	0.616083	3.37305	3.23444	0.924125	1.63499	1222.67	881	1097.39	1154.33	1068.92	3.34821	2.30179	3.9267	4.0678	2.04294	2.86658	2.23195	3.32063
6_-_13063	NM_007808	Cycs	68.7781	11.2138	10.6905	Inf	Inf	329.412	274.228	300.726	288.802	300.75	454.911	337.34	299.476	245.537	22.0013	14.5288	12.073	11.5811
8_+_74256	NM_001276279	Cyld	0.153461	0.178708	0.24045	0.599831	0.321749	1726.67	1368.29	1673.44	1661.85	2144.54	23.6607	19.0537	19.6335	19.209	9.83226	8.00652	6.59767	7.83132
17_-_13078	NM_009994	Cyp1b1	9.12496	5.96907	5.26811	10.9623	9.56059	2916.22	2843.7	2902.01	2930.97	2913.97	204.688	73.5294	54.712	84.0678	127.419	40.9233	29.001	29.2659
4_-_13110	NM_010008	Cyp2j6	0.113964	0.248122	0.24718	0.195474	0.155734	412.567	402.926	430.164	350.413	432	24.1071	31.202	49.4764	44.8588	4.43372	6.32015	7.78037	7.90461
8_-_102294	NM_133969	Cyp4v3	0.776838	1.23308	2.86074	2.95938	0.759574	591.333	903.778	719.6	702.333	751.333	6.02679	6.39386	9.42408	12.5424	1.29285	2.2975	2.46858	2.80688
5_-_13121	NM_020010	Cyp51	0.379025	0.450116	0.44084	0.345759	0.375467	842.904	943.191	887.6	864.992	914.532	126.116	465.729	320.942	172.655	49.3213	157.868	118.465	53.0859
10_+_28109	NM_026579	D10Wsu102e	4.3093	1.97144	1.93739	3.89969	4.88309	2573.88	2537.02	2382.01	2490.23	2455.78	20.5357	19.4373	15.7068	13.1073	24.5581	20.0605	14.4972	9.40568
15_+_210998	NM_145959	D15Ertd621e	4.71331	1.40347	1.59349	2.74077	4.23717	2683.59	2679.91	2659.82	2705.39	2718.23	106.027	103.069	114.136	92.6554	62.515	53.2307	30.4161	19.4654
16_-_67102	NM_025967	D16Ertd472e	0.585201	0.306036	1.36547	1.254	0.621196	2455.47	3319.81	3550.65	3315.55	3678.79	12.7232	10.1023	10.4712	6.32768	9.89387	8.55122	6.74183	5.99619
17_-_28106	NM_080837	D17Wsu104e	0.125475	0.0723513	0.0817346	0.0812597	0.0767208	671.995	786.63	683.896	647.079	621.99	60.2679	74.9361	56.5445	75.3672	29.318	32.5275	34.3021	40.2323
1_-_52392	NM_133825	D1Ertd622e	1.7204	0.79648	1.06197	1.12057	1.77501	1505.45	1441.6	1407.08	1396.78	1427.84	22.9911	9.20716	14.1361	8.24859	7.88915	3.58842	5.53257	2.72043
1_+_98314	NM_178882	D2hgdh	2.33429	0.292308	0.342	0.44186	0.745098	1426.12	1411.88	1459.85	1473.63	1463.61	3.57143	4.21995	4.97382	4.0678	3.22411	2.87695	1.7636	3.67274
3_+_241944	NM_001101478	D3Ertd254e	1.31783	2.18063	1.85326	1.62518	3.25777	3961.29	3992.48	3932.03	4057.34	4012.07	19.8661	18.798	20.1571	18.6441	6.90976	5.71204	2.67226	2.3646
3_-_229473	NM_172681	D930015E06Rik	NaN	Inf	0.674699	0	0.674699	112.444	132	113.143	100	120.522	1.78571	1.79028	2.87958	2.59887	3.65197	1.64166	1.87132	1.5237
12_+_208846	NM_026102	Daam1	2.57402	0.543652	0.550579	0.987638	1.0827	2296.15	2278.52	2274.85	2321.1	2217.93	12.0536	23.1458	21.9895	18.9831	6.42524	9.43511	10.4422	9.29211
17_-_76441	NM_001008231	Daam2	1.16037	3.5666	2.56502	4.53968	Inf	1175.55	1128.14	1274.4	1500.5	2235.67	4.6875	6.01023	3.14136	6.10169	2.94374	1.91571	1.2367	1.37909
5_+_231871	NM_144915	Daglb	Inf	2.0291	3.99762	2.50356	5.14846	839.492	790.463	784.173	818.773	766.266	9.15179	9.59079	5.75916	10.6215	7.02696	7.31881	7.65157	7.58949
3_-_26377	NM_011932	Dapp1	0.710075	0.594144	0.89665	0.663966	1.23901	1537.02	1019.64	1475.71	1652.53	1349.59	3.125	7.41688	3.9267	6.32768	2.24775	2.96719	3.32169	3.93535
5_-_27214	NM_001190717	Dbf4	Inf	1.00463	1.5787	Inf	2.72685	166.214	173.946	176.844	178.894	184.314	45.5357	23.0179	27.2251	11.8644	30.448	19.383	18.5041	7.63954
11_+_13169	NM_001146309	Dbnl	0.221656	0.108866	0.211023	0.23078	0.427974	735.453	721.284	721.972	774.577	713.355	40.8482	50.3836	57.5916	59.209	22.5806	24.2439	30.102	32.4204
7_+_13170	NM_016974	Dbp	0.117758	0.0377261	0.149481	0.117588	0.440138	206.791	189.235	180.075	204.406	196.569	3.79464	6.77749	8.37696	30.3955	1.15485	2.59889	6.15648	10.4028
9_+_83703	NM_031403	Dbr1	0.83125	0.262069	0.345455	0.548889	0.49875	295.857	284.992	314.178	309.175	302.082	29.4643	24.4246	14.9215	19.322	9.56151	8.75307	6.438	6.31834
4_+_242418	NM_153167	Dcaf10	0.0393448	0.102899	0.0923777	0.0810827	0.110745	2594.23	3039.9	2798.01	2883.58	3038.11	13.8393	18.798	13.6126	16.7232	14.6366	16.5777	12.3414	10.9274
4_-_68970	NM_026893	Dcaf12	0.262508	0.412899	0.189435	0.147541	0.200907	979.3	1133.36	992.769	965.819	963.704	31.0268	29.9233	33.2461	29.0395	20.995	20.5078	17.5747	14.6607
12_+_73828	NM_030246	Dcaf4	0	0	0.191948	0	0.595702	322.688	329.667	324.538	319.579	334.875	4.01786	4.98721	4.97382	9.03955	8.01462	10.5951	28.0281	38.0795
11_+_71833	NM_027946	Dcaf7	0.215772	0.141824	0.186684	0.396792	0.442062	4091.16	3952.44	4046.3	4061.03	4302	52.9018	56.266	59.6859	63.6158	39.6995	45.7121	52.5877	39.6151
1_+_98193	NM_153555	Dcaf8	0.717229	0.616763	0.518837	0.674217	0.549906	1081.08	1248.66	1129.9	1026.43	1166.73	17.1875	29.9233	42.9319	46.6667	19.7816	28.7056	35.54	41.3165
10_+_66686	NM_025705	Dcbld1	1.21662	0.624319	0.717166	1.23797	4.86649	1004.62	1114.43	1109.86	1169.67	1241.62	12.0536	6.26598	5.49738	4.51977	6.04537	2.55187	2.94144	2.21338
16_+_73379	NM_028523	Dcbld2	1.30559	0.826253	1.21147	1.41092	1.15895	2928.14	2971.96	3036.72	3117.7	3006.58	61.8304	58.5678	72.2513	59.209	37.9922	24.3323	14.9333	8.79789
14_+_75901	NM_133761	Dcp1a	4.90594	1.71738	1.41223	2.49474	3.56838	3579	3397.67	3538.2	3222	3290.74	6.69643	6.39386	5.2356	5.19774	9.2121	7.2707	6.24916	5.18158
18_+_70640	NM_027490	Dcp2	6.09806	1.29304	1.14937	2.39453	2.44242	6194.32	5044.12	5176.84	5872.17	6345.33	17.8571	13.9386	9.42408	14.2373	5.68877	3.63569	3.31686	3.52829
10_+_69654	NM_001190454	Dctn2	0.560705	0.405143	0.422642	0.476537	0.85035	418.737	411.917	408.61	416.715	407.663	56.25	78.0051	71.7277	97.6271	73.106	90.3023	107.267	133.077
18_+_67665	NM_026302	Dctn4	1.7149	0.456041	0.632151	0.938012	1.15659	2000.56	2051.13	2028.94	2035.13	2065.04	57.3661	65.3453	54.9738	70.8475	36.8776	41.2842	37.4012	32.5089
7_+_59288	NM_021608	Dctn5	0.349206	0.290616	0.475889	0.029019	1.32748	868.68	874.889	873.609	871.149	873.444	38.1696	53.5806	52.8796	69.1525	49.0177	47.856	52.9973	53.6074
3_-_114893	NM_001205362	Dcun1d1	9.50887	30.2297	9.79272	23.9496	8.15514	2612.47	2583.07	2571.57	2568.98	2594.84	27.4554	28.9003	23.822	33.4463	3.17597	2.52472	2.72319	2.81098
7_-_233805	NM_001163703	Dcun1d3	0.244216	0.123229	0.135142	0.148113	0.183142	2809.98	2632.8	2756.58	2280.98	2742.4	17.8571	17.6471	12.8272	22.0339	13.5933	13.8966	9.92675	10.0135
11_-_67880	NM_026428	Dcxr	0.0159428	0.02435	0.0293379	0.0228282	0.027337	227.315	130.899	126.702	144.559	147.77	15.4018	36.0614	35.6021	65.8757	19.979	41.8435	68.4619	125.363
8_+_66498	NM_025600	Dda1	0.621327	0.234655	0.287291	0.39119	0.374171	1359.41	1236.41	1293.93	1354.21	1375.79	64.0625	68.9258	73.0366	72.9944	62.217	68.8144	82.043	77.9888
3_+_69219	NM_026993	Ddah1	1.40967	0.591771	0.759666	1.39471	2.31314	2326.53	2278.46	2284.36	2288.57	2405.94	151.116	109.463	79.3194	62.0339	187.978	119.101	121.446	363.582
3_+_73284	NM_030143	Ddit4l	0.0546947	0.339296	0.309163	0.464612	0.132911	817.065	679.312	610.755	555.621	853.318	7.14286	6.26598	7.59162	12.0904	4.82599	3.27821	4.20946	7.26217
4_+_13200	NM_007838	Ddost	0.35992	0.368547	0.422269	0.461325	0.532421	451.062	455.946	463.673	459.973	440.58	73.8839	84.1432	78.2723	102.486	124.069	124.509	133.279	143.673
1_-_18214	NM_022563	Ddr2	1.58362	0.400086	0.496736	1.14065	2.35782	5236.12	5223.59	5134.2	5209.09	5299.48	67.6339	155.371	141.623	161.13	79.2492	97.5739	68.9564	90.451
9_-_77591	NM_029936	Ddx10	0.0552871	0	0.0351341	0	0	451.929	455.577	452.058	448.862	454.513	17.4107	17.5192	15.1832	8.81356	12.7987	12.0215	11.9799	8.57204
10_-_56200	NM_019553	Ddx21	0.0865141	0.157363	0.144265	0.121953	0.218321	1395.81	1519.78	1390.48	1519.13	1618.3	154.911	111.253	90.3141	62.0339	60.2994	43.9087	28.7594	15.9922
2_+_227674	NM_001033294	Ddx31	0.397845	0.275431	0.399236	0.448122	0.386075	585.511	565.9	636.5	577.667	650.077	6.69643	5.11509	4.71204	4.40678	5.41096	4.11534	3.7588	2.17193
X_+_13205	NM_010028	Ddx3x	1.057	0.212109	0.339048	0.313064	1.66232	2510.2	2508.75	2511.08	2507.87	2510.55	254.688	259.974	232.461	175.254	135.446	115.997	65.8202	44.6925
Y_-_26900	NM_012008	Ddx3y	0.252252	0	0.226537	0	0.818713	2528.04	2528.91	2529.68	2527.1	2529.87	21.875	26.7263	28.534	26.4407	11.1662	12.9588	9.63479	5.99478
11_+_72047	NM_028074	Ddx42	0.643618	0.126534	0.303408	0.169164	0.774671	902.052	865.243	863.006	846.302	887.247	40.4018	44.1176	44.2408	40.226	17.6906	17.4305	13.602	11.2911
13_+_212880	NM_001282055	Ddx46	0.139543	0.228513	0.227153	0.245713	0.294229	802.92	642.982	782.079	936.445	872.132	48.8839	48.8491	42.9319	34.1243	34.4999	28.1773	25.5242	13.8985
8_-_234374	NM_001024922	Ddx49	1.45393	1.52801	1.26316	0.979496	0.665535	202.25	251	178.85	135.054	212	6.69643	12.7877	9.68586	10.1695	22.8707	28.2737	31.2011	23.9571
5_+_69663	NM_027156	Ddx51	0.0388781	0.283705	0.234843	0.229957	0.0854967	1304.39	1188.64	1667.73	1886.06	1411.7	14.7321	11.2532	8.37696	6.89266	9.69309	5.55221	2.64185	4.06205
11_+_78394	NM_030096	Ddx52	0.966877	3.60209	4.37054	3.14583	1.69195	771.444	685.108	685.451	759.759	771.937	24.7768	27.2379	22.7749	26.7797	11.8072	12.2862	8.83805	7.69217
5_+_67848	NM_001190795	Ddx55	0.516026	0.652778	0.559028	0.385	0.708333	307.5	274.069	280.111	258.93	257.564	12.9464	16.1125	14.9215	11.4124	5.09315	5.6387	5.34551	5.6704
11_-_52513	NM_026538	Ddx56	0.0238345	0.114258	0.0953379	0.0565692	0.0418714	562.956	558.038	447.185	339.821	528.622	29.2411	27.6215	24.8691	20.339	41.5592	40.8807	41.7348	27.1565
4_-_230073	NM_172689	Ddx58	0.138714	0.120697	0.113808	0.0740449	0.174176	1063.42	1057.09	1022.06	1098.87	1054.61	9.82143	19.6931	14.1361	17.8531	10.7808	24.7919	13.5232	17.1118
1_+_67997	NM_026500	Ddx59	4.40171	0.880342	5.28205	0	3.22792	129.452	127.069	132.667	131.143	129.241	22.5446	14.9616	21.9895	15.4802	3.02676	3.1175	2.43327	5.07687
9_+_26901	NM_026794	Deb1	0.419292	0.455639	0.149261	0	0.950174	249.373	253.505	250.393	250.6	247.533	21.2054	22.7621	20.9424	20.339	11.4585	15.3857	17.0983	30.1024
1_+_21945	NM_001128609	Dedd	0.325172	0.572455	0.402871	0.416156	0.560877	576.304	551.119	575.613	557.929	548.583	39.5089	35.6777	40.3141	32.7684	5.21964	4.83372	4.17571	3.95219
1_-_13244	NM_007853	Degs1	0.269149	0.103713	0.111691	0.132052	0.487925	731.103	715.079	722.408	716.81	731.588	337.054	305.627	303.141	291.864	156.997	164.492	127.871	102.75
6_-_209773	NM_172477	Dennd2a	0.417976	0.352548	0.546073	0.44186	0.667812	832.436	779.761	818.03	843.588	908.694	15.8482	16.8798	17.801	17.7401	6.16039	7.04757	6.66742	8.78077
9_+_102442	NM_001162917	Dennd4a	1.29043	1.77391	1.68271	2.77746	0.837681	954.969	1184.68	1274	1154.71	1160.71	12.7232	27.4936	32.4607	33.2203	9.87912	15.8844	15.2087	12.4641
4_+_329877	NM_184088	Dennd4c	5.69344	1.0877	1.04369	2.06513	2.60442	1585.19	1635.45	1611.5	1694	1649.82	18.5268	9.20716	9.94764	12.4294	10.683	5.76454	1.98201	1.67565
6_-_320560	NM_177192	Dennd5b	0.664564	1.75987	0.646104	0.949378	0.479963	3115.36	3048.11	1906.76	2769.86	4185.43	4.24107	3.19693	3.66492	2.59887	7.14505	3.05856	4.91491	4.76175
5_+_68184	NM_026603	Denr	0.325138	0.272942	0.241508	0.281759	0.408879	248.939	258.958	259.705	260.261	252.184	112.054	82.8645	60.2094	55.8192	71.1518	60.2789	80.908	57.696
3_+_76131	NM_001172093	Depdc1a	0.748629	0.282815	0.998172	0.546618	1.49726	543	649.043	675.026	561.067	633.333	10.2679	4.98721	7.8534	1.35593	15.0973	6.65387	5.74804	1.49352
6_+_232449	NM_172733	Dera	0.345009	0.185606	0.206751	0.165305	0.321348	650.043	659.319	644.449	694.914	661.281	25.2232	25.0639	18.3246	20.904	13.1582	13.5262	16.5967	14.9428
15_-_67819	NM_024207	Derl1	0.192115	0.124213	0.157393	0.183471	0.201646	1209.49	1301.56	1282.08	1343.47	1279.05	106.473	170.46	148.429	162.034	60.2679	90.0467	74.0143	62.6524
11_-_116891	NM_033562	Derl2	0.0535607	0.190621	0.202987	0.175291	0.0931925	660.606	654.377	591.237	540.941	627.594	49.1071	45.2685	44.5026	47.0056	32.4443	35.5579	31.4458	25.1358
7_-_76375	NM_029585	Det1	0.00541139	0.0500554	0.0500554	0.0190687	0.00834256	957.532	1898.61	1911.68	899.3	1020.07	6.25	4.73146	2.6178	8.0226	7.71001	6.21574	4.63557	7.60458
16_-_27886	NM_022408	Dgcr14	0.226398	0.445848	0.293529	0.28001	0.173128	435.148	522.231	460.156	331.7	350.216	5.80357	8.18414	5.2356	8.36158	5.36065	5.71277	5.83361	7.51423
16_-_13356	NM_010048	Dgcr2	0.561925	0.0653048	0.158705	0.0498202	0.764645	2147.39	2141.57	2147.67	2152	2149.87	23.4375	19.5652	22.2513	21.5819	25.369	22.034	14.1744	13.3103
1_+_227333	NM_177646	Dgkd	0.0336832	0.00681497	0.0156708	0.0739542	0	2058.5	2035.16	2054.81	2071.47	2094.45	16.9643	18.6701	9.94764	11.0734	7.57714	5.97271	4.25381	3.29016
11_-_56077	NM_019505	Dgke	1.62204	0.69516	0.701845	1.52066	2.02755	2198.89	2304.24	2349.4	2540.3	2462.88	6.47321	6.64962	5.2356	4.51977	3.85499	4.14283	1.91648	1.546
4_-_67422	NM_026144	Dhdds	0.550363	1.95022	1.74895	1.71378	0.779243	1734.81	1727	1585.78	1479.52	1649.15	14.9554	11.509	13.089	13.7853	10.2905	10.4655	7.95532	9.35925
13_+_13361	NM_010049	Dhfr	0.472047	0.400123	0.262122	0.337276	0.101507	1040.77	832.489	687.479	905.431	746.13	29.2411	14.9616	13.3508	7.79661	5.72284	2.21932	2.27164	1.50355
8_-_56749	NM_020046	Dhodh	2.9782	0.672596	0.60845	2.88477	1.69757	534.308	572.457	535.959	581.85	558.724	7.8125	6.26598	5.2356	3.27684	5.9845	4.82552	6.44555	3.92522
12_-_66375	NM_025522	Dhrs7	0.232168	0.232168	0.402424	0.431169	1.50909	182.681	190.017	182.667	177.675	182.836	13.1696	21.867	20.9424	26.8927	4.18226	6.52589	9.51645	12.137
2_+_241452	NM_175512	Dhrs9	0.387996	0.254795	0.359935	0.353224	0.692942	4094.63	3854.15	4268.04	4319.2	4309.03	11.8304	6.77749	3.9267	8.58757	8.99027	3.96535	2.34668	2.044
7_-_101437	NM_001286032	Dhx32	0.128049	0.0202182	0.116408	0.0439024	0.569106	267.912	258.789	275.966	275.46	271.255	16.9643	18.798	22.7749	17.7401	14.7623	14.3233	13.4374	15.3208
11_-_216877	NM_178367	Dhx33	0.288899	0.24554	0.281024	0.410174	0.794604	2770.2	2846.87	2803.49	2691	2748.58	26.5625	22.6343	13.089	14.1243	23.087	15.1787	6.7067	5.32452
7_-_71723	NM_001285932	Dhx34	0.396907	0	0.793814	0	0.264605	94.4242	83.6	96	91.2	111.077	2.23214	2.42967	1.3089	2.93785	2.66187	2.80618	4.3506	2.51561
3_-_72162	NM_028136	Dhx36	0.224889	0.882081	1.0313	0.742655	0.327015	961.483	1007.13	976.372	818.032	1035.68	50.6696	40.9207	49.4764	51.1864	26.0866	27.5782	20.2121	14.1596
11_-_67487	NM_026191	Dhx40	0.416759	0.921036	0.639163	0.570209	0.411777	549.949	524.866	485.734	511.708	548.558	41.7411	60.9974	73.5602	67.0056	18.8911	22.8319	21.9753	19.8226
17_-_106794	NM_001163759	Dhx57	0.124025	0.146285	0.116431	0.10373	0.433301	469.167	470.625	468.488	469.615	469.776	5.35714	5.49872	6.80628	7.57062	8.14721	10.5269	12.2514	8.75675
11_+_217207	NM_144831	Dhx8	3.18624	2.88112	1.52207	0.91517	3.5671	468.131	472.212	473.967	463.265	455.9	26.3393	23.2737	25.6545	28.2486	13.9428	15.0329	10.5108	8.70021
12_-_192119	NM_148948	Dicer1	0.118846	0.554641	0.563236	0.256748	0.168491	516.692	1221.73	1027.6	1029.37	968	30.1339	21.0997	19.8953	18.9831	31.399	14.3407	4.16497	3.89435
13_+_66254	NM_025447	Dimt1	0.150667	0.435259	0.383515	0.188333	0.154739	309.429	274.186	261.368	274.676	292.325	28.7946	19.4373	18.5864	13.2203	13.666	10.0966	6.50149	3.97565
10_-_64451	NM_001081419	Dip2a	0.202958	0.0199762	0.0325254	0.130101	0.256909	1598.41	1623.77	1601.61	1629.62	1593.48	32.5893	19.0537	20.6806	24.1808	17.7456	8.83382	4.88163	5.42475
15_+_239667	NM_172819	Dip2b	1.84202	0.780896	0.991321	1.89356	4.53998	3494.22	3519.56	3530.12	3649.57	3604.38	16.0714	20.4604	18.3246	13.2203	10.7837	8.34129	5.83596	5.68456
13_+_208440	NM_001081426	Dip2c	0.822084	1.17024	1.43403	1.9536	1.50561	2673.71	2730.66	2710.24	2628.29	2708.95	13.6161	15.601	19.6335	19.774	8.21514	5.53935	2.16694	2.2596
16_-_224132	NM_153550	Dirc2	0.449641	0.328527	0.354397	0.321172	0.614416	608.397	587.2	611	589.186	571.606	22.3214	27.3657	25.3927	35.8192	19.1073	17.5643	18.7864	16.2193
14_-_72662	NM_028315	Dis3	0.253224	0.309496	0.253224	0.159224	0.084408	268.136	437.965	757.379	528.417	541.742	44.1964	25.9591	28.2723	14.4633	32.7998	21.7455	13.9909	7.5433
9_-_213550	NM_001177784	Dis3l	14.087	Inf	1.1668	9.5336	0.825296	50.0714	43.2444	49.8588	32	61.9	10.0446	10.8696	6.02094	12.4294	6.78904	5.91968	5.74984	7.41331
3_+_56811	NM_020265	Dkk2	4.69661	0.803432	1.19468	1.49192	4.38706	1624.32	1844.32	1675.33	1731.88	1801.23	39.5089	43.734	104.974	132.768	14.7703	17.0709	26.5973	54.7627
7_-_50781	NM_015814	Dkk3	2.16905	0.478013	0.552442	0.873794	1.16082	1936.58	1952.98	1997.69	1933.38	2015.96	20.5357	37.468	57.3298	120.339	16.2926	23.1596	30.3802	51.189
9_-_235339	NM_145614	Dlat	3.42364	2.50883	4.02827	2.18233	3.42992	575.306	580.309	583.053	577.243	576.968	77.2321	59.9744	62.5654	62.7119	27.6206	23.2549	26.1114	19.6249
8_-_50768	NM_015802	Dlc1	8.00818	1.74233	1.55883	2.57442	2.68829	2430.37	2459.05	2441.14	2439.28	2414.62	142.188	109.079	96.8586	88.3616	54.0821	43.659	30.7722	28.6032
12_-_13382	NM_007861	Dld	0.963091	1.28771	1.16513	1.10185	3.14779	568.229	586.433	574.489	567.394	580.672	138.616	120.716	129.058	125.537	52.3162	50.8224	54.3551	36.013
11_+_13385	NM_001109752	Dlg4	0.00544194	0.0104293	0.0117745	0.0121105	0.0255091	1180.43	2256.86	1763.6	1830	1365.2	1.5625	1.91816	1.04712	1.69492	19.6315	21.3373	30.0869	24.3807
2_+_228836	NM_001277187	Dlgap4	0.835304	0.726204	0.807568	0.459882	0.187932	375.518	286.121	335.6	236.87	410.022	96.2054	90.1535	84.8168	83.5028	58.4816	59.5336	70.6738	53.2461
18_+_240283	NM_001081371	Dmxl1	0.72	0.126025	0.162562	0.182882	0.707143	1743.66	1765.48	1751.17	1776.01	1749.83	22.9911	16.1125	17.801	18.1921	12.6117	7.78847	6.40153	3.83733
8_-_56445	NM_019794	Dnaja2	0.386144	0.420814	0.332761	0.410227	0.364121	720.02	798.398	692.821	723.441	734.217	148.661	152.558	142.408	138.192	106.284	104.087	89.199	58.817
8_+_81489	NM_018808	Dnajb1	0.543557	1.02916	0.799287	0.910952	0.84426	824.322	842.787	825.841	760.893	846.465	59.8214	56.1381	43.9791	56.1582	28.0254	24.7115	26.531	29.7751
3_+_70604	NM_001033155	Dnajb14	0.127421	0.560721	0.452796	0.436215	0.0463859	934.256	1006.44	698.248	837.8	914.143	27.2321	25.8312	19.6335	23.7288	7.91074	5.0529	6.17349	10.464
3_-_67035	NM_027287	Dnajb4	1.33944	1.12549	1.40682	0.971379	1.03804	545.442	798.757	761.565	788.073	701.252	32.1429	15.8568	14.3979	15.7062	88.5515	52.7655	55.6314	46.3141
12_-_27362	NM_013760	Dnajb9	1.35352	0.319759	0.534274	0.49226	0.643204	1147.04	1157.72	1157.8	1157.38	1153.87	34.5982	38.7468	37.1728	42.3729	11.3122	13.7677	11.5784	12.3496
2_+_66861	NM_024181	Dnajc10	0.268023	0.25776	0.200964	0.292417	0.387227	812.214	825.827	809.165	790.876	831.969	72.3214	72.7621	71.9895	68.5876	66.4598	57.8948	57.9634	39.6847
4_+_230935	NM_172704	Dnajc11	0.766411	0.513799	0.482405	0.38476	0.76883	774.308	767.25	706.461	782.374	775.906	37.5	31.0742	23.822	23.9548	29.4479	28.3411	31.9862	20.1158
10_+_30045	NM_013888	Dnajc12	0.227051	0	0	0.402832	3.33008	539.898	536.118	535.452	539.1	536.158	7.58929	3.96419	5.2356	6.44068	2.62921	2.63286	3.51375	4.14997
10_+_74330	NM_028873	Dnajc14	0.817743	0.36703	0.436032	1.03836	0.494644	751.657	712.548	697.769	709.117	782.81	20.7589	23.2737	24.6073	28.5876	71.9831	83.712	87.2617	113.442
4_-_214063	NM_172338	Dnajc16	1.51494	0.415527	0.415866	0.907753	0.86015	2905.33	2839.78	2829.1	2953.17	3122.83	13.1696	10.6138	12.5654	15.8192	3.97651	3.18656	3.72725	6.21205
18_-_76594	NM_029669	Dnajc18	0.265585	1.24532	0.866397	0.377775	0.322999	2136.34	1632.43	1869.9	1902.93	2015.85	28.7946	33.7596	37.1728	45.3107	7.97805	9.42239	8.33133	9.42384
4_+_72429	NM_001033165	Dnajc25	0.0709633	0.325792	0.247197	0.184615	0.124905	954.091	639.27	954.498	695.596	689.041	39.7321	34.399	35.6021	32.9944	103.851	99.229	110.89	117.402
14_+_100037258	NM_008929	Dnajc3	0.0327229	0.116721	0.114565	0.094938	0.034261	981.138	1111.89	1188.65	1041.1	1249.1	168.304	149.488	136.911	124.972	55.5907	42.5971	34.1187	24.5719
5_+_66114	NM_025362	Dnajc30	0.0145509	0.0134845	0.0105344	0.00922971	0.0162506	825.133	455	684.707	1316.4	904.426	8.70536	9.59079	6.5445	12.9944	14.3417	15.9782	18.9814	27.6119
4_+_68598	NM_172400	Dnajc8	0.551261	0.397032	0.346646	0.256358	0.286351	564.792	556.11	568.034	565.57	564.471	81.25	90.5371	84.0314	70.9605	48.206	50.3941	62.6787	73.9072
14_-_108671	NM_134081	Dnajc9	0.14346	0.0806233	0.126866	0.068	1.17919	483.972	486.294	485.11	491.263	482.029	53.125	32.4808	29.8429	27.6836	39.7501	27.5157	35.7869	29.3553
12_+_13435	NM_007872	Dnmt3a	1.56166	1.06347	0.748153	1.10073	0.917275	4732.64	3173.23	2374.18	3069.88	3916.91	2.90179	2.17391	2.09424	2.59887	6.23269	3.38929	5.05535	6.39759
2_+_76233	NM_133763	Dnttip1	0.172785	0.212141	0.103204	0.0734334	0.174064	282.004	239.979	255.202	252.888	276.089	32.5893	32.9923	30.3665	27.7966	13.5772	14.5539	19.4654	18.8682
4_-_67299	NM_001290636	Dock7	0.172176	0.245603	0.802934	0.649485	0.286537	411.049	403.716	416.393	412.617	433.164	29.9107	25.7033	24.6073	26.2147	36.4141	28.2763	33.0174	26.6159
8_-_114255	NM_053246	Dok4	0.935558	0.171598	0.389087	0.132799	0.30433	1235.31	1221.55	1245.57	1248.25	1247.87	7.36607	8.95141	5.2356	11.0734	4.24692	3.14506	2.64162	3.83692
10_+_208266	NM_199322	Dot1l	13.3139	7.58151	4.57936	11.0333	7.48905	1886.25	1836.47	1812.27	1511.09	1811.88	13.3929	10.9974	8.90052	5.53672	17.0944	10.1504	9.50943	6.95079
9_+_13478	NM_007875	Dpagt1	0.107022	0.107658	0.0849093	0.117844	0.194989	521.024	528.195	521.556	511.6	528.69	9.15179	13.8107	9.1623	13.1073	31.4304	28.6853	29.1672	28.3873
2_-_13480	NM_010072	Dpm1	0.311362	0.0751764	0.0878685	0.176023	0.198718	105.88	130.89	119.32	129.697	120.018	36.6071	51.1509	45.8115	51.0734	56.8232	35.6389	42.4931	50.4075
9_+_74388	NM_028906	Dpp8	0.22527	0.150448	0.196469	0.312891	0.355698	2068.42	1757.84	2041.07	1813.7	2307.83	34.1518	34.1432	37.4346	39.548	36.7114	32.6573	19.4449	12.5165
1_+_56429	NM_019759	Dpt	0.398558	0.495839	0.301045	0.263415	0.667725	930.869	909.924	970.2	881.714	957.667	32.3661	14.0665	14.6597	45.0847	5.97515	2.5877	2.85968	8.51003
7_-_233115	NM_178704	Dpy19l3	1.03086	0.618459	0.871155	1.0327	1.40453	3717.16	3632.2	3364.04	3096.06	3636.37	10.9375	12.0205	13.089	20.339	8.32678	7.46469	4.4095	4.46577
4_-_381510	NM_001081201	Dpy19l4	0.724432	0.493827	0.600444	0.828772	0.605843	4088.66	3998.32	3942.35	4298.75	3995.43	26.7857	19.5652	25.3927	25.9887	21.7806	16.9693	16.6328	11.2265
14_-_12934	NM_009955	Dpysl2	6.26559	0.461475	0.842642	0.805521	10.8038	2471.17	2468.62	2469.77	2468.54	2471.99	97.3214	110.997	89.5288	72.2034	31.0133	22.3024	20.5891	20.1019
3_+_67171	NM_001286987	Dram2	2.56832	1.55005	1.80645	11.1495	1.64595	441.655	433.433	504.184	524.574	527.525	26.7857	25.0639	36.911	28.8136	18.6887	19.869	18.5615	13.8874
16_-_13185	NM_007834	Dscr3	0.621486	0.159881	0.233454	0.325887	0.646704	1113.18	1160.15	1084.69	1083.27	1108.33	27.9018	43.734	42.4084	48.5876	22.4495	28.0414	26.2122	28.2593
10_-_212898	NM_172508	Dse	0.866729	0.890805	0.827586	0.871009	9.68253	813.51	818.426	813.421	817.511	816.033	178.348	141.049	205.236	149.266	22.3681	20.4122	19.7526	18.7686
2_-_66934	NM_025853	Dsn1	0.124446	0.350201	0.306196	0.208074	0.166131	1064.76	1338.42	1442.68	1422.5	1321.6	10.7143	6.39386	5.2356	3.9548	9.61879	6.25568	5.8602	3.34792
1_+_213452	NM_172516	Dstyk	0.500773	0.124175	0.215121	0.2752	1.548	3245.43	3244.69	3259.7	3263.21	3281	14.2857	14.4501	10.9948	17.6271	3.13016	2.99758	1.94973	1.36987
1_-_76843	NM_029766	Dtl	1.95536	0.259233	0.728059	1.24432	0.441532	1843.13	1835.51	1828.99	1830.82	1842.53	33.4821	10.4859	8.63874	7.9096	19.0985	6.04716	4.15544	2.19792
18_-_68857	NM_026854	Dtwd2	0	0.0761559	0.138712	0.194197	0.340697	1094.61	1136.95	1059.63	1313.47	935.941	4.24107	5.88235	8.37696	3.84181	1.73259	1.81938	1.81015	1.97989
19_-_207521	NM_172442	Dtx4	5.49033	1.48563	1.20513	3.35714	2.18429	2793.38	3027.16	2910.32	2863.3	2887.29	4.24107	4.73146	6.02094	4.74576	2.10829	1.97662	1.74465	1.24973
17_+_224907	NM_144858	Dus3l	0.714286	0.166667	0.103896	0.232143	0.202381	162.755	154.595	151.636	167.692	161.073	8.25893	12.6598	13.6126	9.26554	7.50858	9.97986	11.4249	9.41973
6_-_72102	NM_028099	Dusp11	0.282428	0.966923	1.13187	0.94554	0.407981	1333.55	2017.47	1989.41	2105.52	1859.34	57.5893	56.1381	49.4764	55.3672	23.9237	22.2841	14.6276	14.4078
11_+_75219	NM_173745	Dusp18	5.16947	1.19777	1.62871	3.09472	3.5638	3171.91	3627.62	3468.97	3430.98	3491.7	7.58929	13.2992	13.6126	14.5763	4.08221	5.96673	5.2671	5.16214
2_+_68082	NM_024438	Dusp19	0.215042	0.39261	0.482887	0.921875	0.305648	2170.8	2159.61	2263.64	1846.7	2371.19	16.0714	19.6931	16.7539	20.904	34.233	19.7448	18.2591	20.02
11_-_72349	NM_028207	Dusp3	1.52399	0.722015	0.789171	1.17313	1.63266	3224.64	3213.09	3276.51	2986.29	3345.97	42.8571	94.3734	78.7958	104.068	16.0599	27.6959	16.016	20.6592
8_+_319520	NM_176933	Dusp4	2.11661	1.30327	1.37429	1.9946	1.97209	3047.34	3005.61	3040.28	3064.11	3034.96	42.4107	78.2609	51.8325	22.7119	19.7142	16.9723	6.61789	3.00579
8_-_234663	NM_001013380	Dync1li2	0.881195	0.496575	0.673613	0.524407	1.03419	2376.92	2203.28	2289.16	2205.78	2452.13	66.0714	65.4731	68.3246	79.887	43.1124	43.7198	27.4337	24.9875
9_-_110350	NM_029851	Dync2h1	NaN	0	0.220172	0	0.330258	234.5	352.75	289.5	289.5	271.429	1.78571	3.83632	1.04712	4.74576	2.40011	2.72022	2.38308	3.967
5_-_56455	NM_019682	Dynll1	2.32032	1.15574	0.963	1.01627	1.6995	246.875	249.571	247.792	249.093	249.247	723.884	549.616	565.183	501.695	196.427	179.16	246.731	267.62
11_-_68097	NM_001168472	Dynll2	1.11414	1.03295	0.764457	0.859178	0.883045	1375.88	1351.99	1273.99	1237.78	1437.81	107.812	143.478	142.932	151.412	42.4943	41.0903	32.3397	45.9464
16_+_13548	NM_007890	Dyrk1a	0.165235	0.14053	0.146221	0.255653	0.170603	1894.84	1791.73	1932.69	2044.99	1986.11	49.3304	50.3836	46.3351	48.8136	18.1541	16.2861	9.61457	6.73744
10_-_69181	NM_001014390	Dyrk2	1.63696	1.09371	0.644879	1.3179	0.670976	3183.27	3559.54	3266.64	3367.14	3474.22	47.3214	42.1995	33.7696	37.5141	11.5841	12.6806	11.8168	8.34359
14_-_66573	NM_025943	Dzip1	2.97056	2.32323	1.33574	2.59768	2.05075	646.951	756	706.061	796.774	676.533	6.47321	12.6598	24.3455	20.339	7.29401	10.5067	9.6623	13.4245
9_+_72507	NM_028258	Dzip1l	0.241607	0.122173	0.155439	0.129903	0.362677	1684.63	1829.13	1684.6	1718.25	1612.24	8.48214	7.41688	7.32984	5.76271	18.8389	12.9385	7.93526	7.49453
16_-_224170	NM_027341	Dzip3	2.54254	1.46895	1.75875	2.40872	1.84669	1705.24	1673.88	1720.45	1758	1727.52	16.7411	7.16113	8.11518	10.3955	15.8099	10.9585	7.8555	4.0746
2_-_13555	NM_007891	E2f1	1.42716	0.711179	0.788695	0.426508	1.96113	977.59	951.328	940	966.258	935.11	25.8929	17.2634	24.3455	22.5989	16.366	12.415	14.8992	14.0044
13_-_13557	NM_010093	E2f3	1.74577	2.032	2.83737	3.88328	2.97207	3014.66	3022.39	2979.37	3123.75	3066.01	40.4018	34.5269	46.3351	36.6102	13.5893	10.7109	7.5848	6.82763
7_-_101604	NM_198011	E430018J23Rik	2.43357	2.23077	4.46154	3.82418	1.45485	534.562	529.5	528.462	534	527.571	1.33929	1.6624	4.71204	3.9548	1.61348	2.38878	1.70756	2.1538
14_+_74427	NM_028932	Eaf1	Inf	2.15603	1.99326	10.8528	4.94338	2746.54	3016.34	3022.29	2984.67	3008.75	53.125	34.7826	37.4346	17.4011	25.7892	18.8078	13.7874	8.4432
12_-_66266	NM_025456	Eapp	0.0368418	0.520728	0.110964	0.137034	0.0398254	451.487	379.122	385.232	320.081	576.088	43.9732	45.1407	38.7435	55.2542	7.76144	11.6901	11.7157	30.4459
7_-_67417	NM_026140	Ears2	0.131098	0	0.674216	3.14634	0.52439	320.305	308.333	324.984	308.333	322.119	8.03571	7.92839	8.63874	7.57062	4.21938	4.22525	2.26498	2.33232
15_+_55960	NM_019480	Ebag9	0.0386591	0.0269442	0.0493978	0.0987956	0.121879	663	640.275	663.513	652.985	660.443	22.7679	15.2174	17.5393	18.8701	7.24111	6.71203	9.45001	11.3823
11_+_13591	NM_001290711	Ebf1	2.07217	1.6243	1.54311	1.61746	2.48235	2111.27	2467.24	2315.36	2644.43	2437.83	14.7321	14.7059	14.1361	15.5932	13.1186	17.7585	10.9191	13.8603
7_-_13593	NM_001113415	Ebf3	5.59584	1.77659	1.60836	4.13923	4.97814	2477.89	2569.46	2475.73	2507.35	2474.11	11.6071	21.3555	20.4188	17.4011	9.19434	14.659	17.212	20.7101
14_-_70601	NM_027475	Ecd	0.213222	0.114812	0.0670026	0.220439	0.358563	448.587	443.27	456.742	457.655	455.604	16.5179	20.3325	15.1832	12.5424	17.4377	17.5002	18.8068	16.9543
10_+_52665	NM_001110195	Echdc1	2.37303	0.536787	0.641927	1.20901	1.13733	1085.39	1117.19	1105.66	1112.58	1095.86	14.2857	18.6701	20.9424	17.8531	8.94381	11.3968	6.06601	5.75164
7_-_93747	NM_053119	Echs1	0.420392	0.318125	0.343957	0.308503	0.387811	432.372	370.924	443.132	472.062	435.13	17.6339	34.7826	33.5079	39.887	18.3624	23.533	33.9182	27.2626
17_+_13177	NM_010023	Eci1	1.79021	0.623377	Inf	0.554113	1.97403	153.123	165.478	158.149	157.073	149.947	20.5357	24.0409	28.534	29.6045	12.8411	15.0978	18.5509	22.9303
9_+_353190	NM_153799	Edc3	0.436525	0.65527	0.477734	0.519185	0.728807	1446.55	1317.14	1385.52	1421.46	1520.05	10.9375	11.1253	12.5654	10.9605	6.25205	6.23662	4.42175	4.86999
6_+_192193	NM_138677	Edem1	0.140909	0.494859	0.448107	0.344104	0.245884	1838	2262.89	2264.44	2179.77	1977.69	66.5179	64.578	59.4241	59.887	32.8361	28.3684	23.2662	19.5063
1_+_66967	NM_001039644	Edem3	1.16423	0.274956	0.275856	0.375804	0.762662	3373.33	3382.28	3383.78	3399.61	3377.33	47.0982	41.8159	50.5236	51.8644	33.4338	27.62	27.7389	26.5406
8_-_13617	NM_010332	Ednra	0.0476776	0.03436	0.0458282	0.0633867	0.0642894	3125.94	1945	2526.91	2502.67	2907.55	5.13393	2.94118	6.28272	8.24859	4.74125	3.0321	2.89861	4.07864
10_+_216238	NM_001001932	Eea1	2.82266	0.33017	0.438107	1.04885	1.33175	3181.79	3196.54	3191.96	3195.14	3190.23	25	27.6215	30.3665	21.2429	15.0609	15.3055	13.4591	6.63314
7_-_13626	NM_021876	Eed	0.565934	0.812623	0	0	0.41266	208.965	211.07	209.032	212.333	210.178	77.0089	47.954	45.5497	45.6497	19.5661	16.9689	14.1826	16.4211
7_+_13631	NM_001267711	Eef2k	0.209708	0.110026	0.0944803	0.0499731	0.1507	658.393	931.744	911.112	774.5	740.922	20.0893	20.4604	17.801	24.5198	10.6468	10.3367	8.93363	8.23402
6_-_65967	NM_023060	Eefsec	0.0118547	0.0300071	0.0744362	0.0237093	0.057327	510.743	528.714	463.75	559.286	611.959	7.8125	7.16113	7.32984	8.36158	5.92684	4.40728	5.13661	3.87569
4_-_27984	NM_025994	Efhd2	0.774138	1.17119	0.887574	1.21604	1.61486	1254.37	1185.16	1292.77	1292.3	1198.34	35.4911	25.5754	32.4607	34.5763	19.2922	15.547	15.7621	14.2483
3_-_13638	NM_010108	Efna3	0.170288	0.0272182	0.0816547	0.172949	0.136464	1252.3	1358.1	1079.56	1338.67	1348.15	2.23214	1.1509	1.57068	4.63277	1.19799	1.10125	1.37306	2.39188
3_-_13639	NM_007910	Efna4	0.150269	0.131312	0.370639	0.400341	1.3496	693.805	763.333	737	796.4	728.071	7.36607	8.18414	7.8534	9.60452	2.8923	3.54957	3.86618	5.93861
17_-_13640	NM_010109	Efna5	0.894149	0.563478	0.713207	1.11455	1.33706	3579.06	3477.78	3382.38	3414.14	3590.29	20.5357	11.8926	23.822	24.9718	28.3184	23.2486	20.0224	24.0954
8_-_13642	NM_010111	Efnb2	7.94362	0.478987	0.69967	1.71243	3.20626	3005.82	3060.48	3050.51	3088.12	3083.48	54.4643	33.8875	44.5026	29.4915	54.5111	30.7277	16.4674	12.6375
15_+_76740	NM_133766	Efr3a	4.95495	1.23687	1.54709	2.42833	3.05724	2469.83	2267.12	2412.05	2304.67	2503.93	17.8571	19.4373	24.3455	26.4407	42.9065	44.3798	45.2853	50.5101
8_-_112405	NM_053207	Egln1	0.5789	0.544602	0.56977	0.623224	0.620253	1724.9	1471.4	1526.22	1671.64	1739.09	41.2946	40.1535	53.9267	51.4124	18.6112	21.7857	32.9332	29.7269
12_-_112407	NM_028133	Egln3	1.28661	0.663688	0.629751	0.293682	0.244099	1296.81	966	1052.3	1255.71	1088.91	2.90179	6.01023	5.49738	4.97175	1.31339	2.16787	2.602	1.98515
14_+_13655	NM_018781	Egr3	3.19276	0.18588	0.299321	0.320533	2.20042	2684.85	2679.56	2679.25	2682.4	2683.38	8.03571	17.6471	7.8534	13.2203	3.77244	4.4687	2.52185	2.97089
19_+_13660	NM_010119	Ehd1	0.170398	0.16655	0.167994	0.178395	0.248595	634.076	648.075	595.576	609.184	651.724	89.2857	98.8491	86.6492	91.7514	115.97	96.9785	98.7943	79.3997
2_+_58521	NM_025613	Eid1	12.6023	6.55927	7.0686	7.06652	6.99458	1058.58	1073.92	1070.56	1072.15	1058.48	108.036	146.292	159.948	208.927	59.9377	92.3844	180.601	183.653
7_+_434156	NM_001177427	Eid2b	2.05969	0.422501	0.864208	1.04383	1.99179	828.351	890.882	873.766	882.333	859.493	3.79464	6.01023	4.71204	8.47458	2.51041	2.5002	3.20679	4.83781
11_+_20918	NM_011508	Eif1	0.499618	0.65422	0.65866	0.537312	0.256672	324.178	301.569	320.547	325.909	304.784	1231.7	1430.18	1152.36	1178.76	196.07	257.378	299.994	560.551
18_+_13664	NM_010120	Eif1a	0.503044	0.28806	0.322625	0.45303	0.521568	1316.52	1336.59	1327.17	1303.59	1308.03	211.161	279.923	259.686	221.13	97.6643	128.919	113.138	64.1305
19_+_69860	NM_027236	Eif1ad	0.0800346	0.304966	0.194045	0.144686	0.0839314	313.455	274.252	251.037	247.082	307.254	72.5446	56.0102	54.1885	54.8023	13.3607	10.7409	12.3317	15.3679
X_+_66235	NM_025437	Eif1ax	0.317161	0.258346	0.241184	0.178026	0.239973	525.154	441.977	510.664	433.572	489.452	304.241	236.829	247.644	202.486	36.1092	27.0631	23.3203	31.1727
3_+_229317	NM_001005509	Eif2a	0.150562	0.0491539	0.193766	0.0449659	0.331093	298.866	296.515	291.296	298.592	297	87.0536	86.9565	81.4136	76.2712	44.462	51.4096	45.8698	35.0443
5_+_15467	NM_013557	Eif2ak1	0.295847	0.30961	0.334205	0.397382	0.417532	1687.04	1481.21	1260	1305.69	1371.5	13.6161	16.8798	13.6126	20	10.7702	13.8663	13.3136	11.7077
17_-_19106	NM_011163	Eif2ak2	2.74429	1.46168	1.43428	2.12547	2.69405	2107.65	1990.16	1857.98	1506.95	1848.38	9.59821	16.2404	20.9424	19.887	8.82117	14.0732	14.077	14.6056
12_+_13665	NM_026114	Eif2s1	0.0142042	0.103228	0.0862311	0.0314024	0.0442394	573.726	615.314	669.871	774.459	677.881	193.304	136.573	135.079	96.6102	52.2391	42.8789	44.2363	25.0372
15_+_75705	NM_145625	Eif4b	0.737688	0.224048	0.251536	0.310465	0.271746	1466.69	1467.52	1332.43	1370.13	1443.83	198.661	220.332	184.293	212.768	103.076	122.305	92.3434	78.2171
10_-_13688	NM_010124	Eif4ebp2	1.6999	0.382096	0.523856	1.05438	1.52676	3478.95	2564.29	2777.7	2800.94	3287.63	43.5268	43.734	43.4555	31.4124	30.961	22.6714	9.42122	6.48124
7_-_13690	NM_001040131	Eif4g2	0.27916	0.305904	0.288995	0.248128	0.308923	1079.42	971.223	978.829	980.228	1015.8	889.509	863.555	790.052	817.288	522.161	468.364	374.748	229.903
3_+_208691	NM_177586	Eif5a2	2.13946	0.779497	0.78932	1.82896	2.95958	3987.77	4051.52	3776.65	3715.73	3893.67	6.91964	5.88235	2.87958	4.40678	9.63393	8.36834	4.86828	2.8112
1_+_226982	NM_198303	Eif5b	0.0144131	0.0524268	0.049339	0.0284552	0.0330151	462.091	442.181	435.322	495.957	557.279	76.3393	68.2864	73.0366	49.8305	27.3044	28.943	36.2995	43.0132
18_-_114615	NM_053255	Elac1	0.464218	0.352468	0.362658	0.168939	0.479961	1858.33	1616.25	1688.08	1504.2	1812.22	7.14286	3.32481	6.5445	6.10169	3.96185	2.20265	2.1097	2.31048
8_-_15568	NM_010485	Elavl1	0.622014	0.92738	0.744424	0.654173	0.480118	1382.01	1315.21	1450.47	1550.21	1479.02	100.446	70.3325	70.6806	50.0565	29.9124	21.7247	16.5745	10.6506
3_-_69257	NM_023502	Elf2	3.42001	1.85555	1.42467	2.5942	1.59966	1001.67	1023.55	988.391	1010.83	971.942	13.8393	11.1253	12.5654	11.6384	15.3696	13.5643	10.8414	14.2804
X_-_13712	NM_007922	Elk1	0.149226	0.128189	0.0782957	0.0836627	0.133319	1459.2	1412.6	1341.36	1435.85	1410.82	20.0893	20.844	22.2513	15.4802	18.4958	20.5408	21.7477	37.9446
10_-_13713	NM_013508	Elk3	0.435743	0.798155	0.787369	0.925133	0.469848	1174.5	1119.29	1221.93	1134.25	1236.81	100.67	84.399	91.0995	99.209	64.5905	45.39	41.3315	39.5909
1_+_13714	NM_007923	Elk4	1.17721	0.524837	0.485503	0.862371	1.15881	2353.4	2507.5	2232.78	2611	2795	3.57143	2.30179	1.3089	1.12994	30.2242	30.292	25.1864	20.7654
13_+_192657	NM_138953	Ell2	1.50908	0.112634	0.136048	0.293828	0.942029	1519.85	1516.8	1524.19	1518.54	1519.13	54.9107	43.8619	60.9948	49.6045	14.7598	10.6379	11.7054	8.85131
5_-_13717	NM_007925	Eln	0	0	0.00314236	0	0.12235	1067.7	1037.48	1072.96	1084.33	1095.51	5.13393	22.6343	9.42408	17.0621	7.44803	19.921	7.44547	12.3094
3_+_170439	NM_130450	Elovl6	0.564691	0.946138	0.829905	0.873595	0.718368	2205.32	2542.64	2568.81	2250.5	2647.09	38.1696	73.2737	71.466	31.7514	11.7915	22.6999	14.3247	7.04727
18_+_58523	NM_021448	Elp2	0.672509	0.375246	0.452666	0.616341	0.71213	227.902	229.049	229.386	226.561	233	45.7589	49.7442	32.199	38.4181	41.4659	31.6163	27.5914	25.4592
2_-_77766	NM_023876	Elp4	0.0111587	0.045633	0.0470817	0.0337399	0.137623	2274.39	1768.93	1758.39	1492.62	2174.99	9.375	8.4399	10.2094	8.58757	6.98925	6.53655	4.01178	7.74226
13_+_13723	NM_010330	Emb	0.498745	1.77368	1.08502	0.741414	0.547273	642.916	510.606	596.194	596.586	698.911	22.0982	13.8107	30.3665	42.0339	23.7327	16.4101	35.0415	35.4526
17_-_193838	NM_001163102	Eme2	0.254622	0.825685	1.67463	1.03579	0.327123	2103.07	2097.82	2474.04	2374.21	2100.96	6.25	9.46292	9.94764	10.5085	21.9883	19.9385	13.2067	12.8206
16_-_13731	NM_007929	Emp2	5.02288	10.1228	8.0366	18.1555	7.63187	2088.65	2343.97	2450.49	2417.79	2481.29	59.5982	53.9642	51.3089	63.0508	44.7415	34.4173	21.2131	16.6193
1_-_13800	NM_001083121	Enah	0.682171	0.318225	0.348275	0.464117	0.415109	2437.9	2373.35	2445.16	2382.95	2400.54	77.2321	90.4092	110.471	74.4633	52.3502	50.2626	55.5135	41.7091
9_-_71946	NM_028013	Endod1	0.698086	1.55402	1.19559	1.14303	0.897333	1956.87	1914.53	1995.26	2173.77	2005.52	11.3839	17.9028	18.5864	17.9661	11.0051	13.7469	8.78631	7.97548
6_-_13807	NM_013509	Eno2	0.0460224	0.0234572	0.0753355	0.0971643	0.306983	959.966	969.2	976.789	1008.61	1043.22	3.34821	7.289	6.02094	6.66667	3.78965	5.39413	8.58895	7.29119
X_-_209224	NM_001271451	Enox2	0.265961	0.27619	Inf	Inf	0.797884	810.438	674.667	712.512	922.933	790.14	2.67857	5.24297	3.9267	4.85876	3.12085	2.46695	3.33898	3.45932
10_-_18605	NM_008813	Enpp1	0.114575	Inf	Inf	1.99922	2.91115	2603.04	2605.44	3029.38	3126.93	3146.88	6.02679	3.06905	7.8534	13.3333	8.45594	4.58473	6.79164	6.61543
12_-_12499	NM_007647	Entpd5	0.473451	0.671216	0.926679	0.458085	0.771398	3078.19	3034.32	3126.45	2770.08	3070.44	4.91071	3.70844	3.40314	9.15254	6.56257	6.94107	5.45876	3.49256
19_+_93685	NM_053103	Entpd7	3.25545	0.909293	1.71084	2.10509	1.51191	3226.86	2438.26	2518.93	2470.37	2806.77	9.375	12.532	13.3508	11.0734	7.49218	9.37165	7.38204	5.5451
15_+_223527	NM_175009	Eny2	0.403147	0.371951	0.511433	0.366229	1.75949	150.223	153.56	149.916	152.424	153.014	164.509	140.153	136.911	107.232	11.4195	12.6912	12.1481	15.9834
2_+_13821	NM_001006664	Epb4.1l1	0.107981	0.331527	0.181917	0.142373	0.168132	1235.75	1416.09	1471.85	1554.96	1476.94	50	33.1202	35.6021	42.2599	24.7124	15.765	16.6792	19.5354
2_+_227867	NM_172663	Epc2	2.40632	0.790847	0.635734	0.891833	0.949679	1162.49	1147.59	1149.27	1173.26	1137.6	22.7679	22.7621	25.3927	23.7288	7.79298	8.97016	4.61079	4.86545
13_-_105298	NM_134065	Epdr1	1.08744	0.15407	0.056335	0.103193	0.546617	1366.37	1360.5	1358.12	1363.2	1366.2	27.4554	17.5192	21.7277	32.2034	19.6445	13.5427	14.9346	18.5513
16_-_13837	NM_010140	Epha3	7.85369	1.19428	1.08796	1.46689	2.79242	2209.49	2013.38	2174.07	2305.73	2310.25	10.4911	11.7647	16.4921	13.5593	9.02539	10.4339	6.21724	6.66874
4_-_13844	NM_010142	Ephb2	0.841705	0.462797	0.489356	0.514197	1.49431	1310.85	1374.98	1248.04	1335.25	1306.45	9.15179	12.0205	13.3508	16.0452	20.0445	18.7559	10.1385	9.64324
5_+_13846	NM_001159571	Ephb4	1.12636	0.673077	0.813636	1.04332	1.47598	775.404	683.913	798.596	782.929	780	5.13393	7.289	7.32984	8.58757	16.879	11.8826	11.9809	14.2235
9_+_77781	NM_175266	Epm2aip1	1.56645	0.650301	0.798253	1.22943	1.63229	5099.46	4999.13	4992.5	5057.85	5029.07	36.6071	36.9565	35.3403	38.3051	12.7316	11.5933	6.07677	4.67552
11_-_13855	NM_001252189	Epn2	7.34391	3.22068	2.9229	5.46857	3.78359	1859.02	1969.82	1898.71	2022.67	1863.13	7.36607	8.69565	9.42408	15.0282	11.7886	7.94611	6.1014	6.81178
4_+_13858	NM_007943	Eps15	1.93067	3.78004	2.10996	2.16777	1.88202	1862.29	1640.74	1720.86	1746.03	1774.56	52.4554	41.5601	49.7382	54.8023	33.7779	32.9132	27.6188	19.4859
6_-_13860	NM_007945	Eps8	1.24866	0.553399	0.689858	0.706174	1.24863	1288.11	1286.31	1300.82	1299.37	1300.32	60.7143	106.905	121.204	97.0621	28.6378	45.0311	30.9296	20.0811
5_+_28042	NM_027652	Ept1	0.549057	0.371642	0.441872	0.606475	0.360187	2038.97	1988.45	2048.91	2128.88	1932.36	58.7054	33.376	48.6911	31.8644	63.4541	36.9075	26.5637	15.533
13_+_80898	NM_030711	Erap1	0.259041	Inf	1.89571	1.33936	0.193692	632.962	594.667	467.914	496.522	483.289	6.69643	10.3581	12.0419	10.1695	16.328	19.9682	24.4977	30.5382
11_+_13866	NM_001003817	Erbb2	0.213459	0.388711	0.411918	0.44302	0.354545	574.141	521.323	624.511	568.037	575.464	6.91964	6.01023	7.06806	6.32768	10.6924	6.18827	5.11223	4.73262
16_+_50505	NM_015769	Ercc4	0.00999958	0.0315633	0.0542615	0.0471525	0.0330366	840.952	974.385	1039.78	1248.95	1404.14	5.80357	8.82353	5.49738	7.11864	7.47879	6.45504	7.03289	3.82389
1_+_22592	NM_011729	Ercc5	2.28659	0	0.365854	2.19512	3.38812	107.721	115.152	112.929	112.226	113.459	29.4643	34.1432	46.3351	51.4124	10.8981	9.57358	8.24103	10.6126
14_+_319955	NM_001081221	Ercc6	0.162462	0.284776	0.257827	0.22396	0.205786	2295.41	2154.72	2329.1	2148.14	2371	11.1607	7.41688	5.49738	5.53672	6.61073	3.91323	2.63795	2.32117
13_+_71991	NM_028042	Ercc8	0.614904	0.622995	0.402616	0.768631	0.845494	481.4	623	636.882	764.6	623	3.125	2.17391	1.3089	2.0339	2.74108	2.45324	2.08129	1.88086
5_+_13874	NM_007950	Ereg	0.908915	0.153761	0.155018	0.344542	1.03967	3490.17	3489.62	3491.2	3480.11	3490.29	104.464	30.4348	39.5288	32.6554	47.7391	15.9823	18.2427	11.4184
7_-_13875	NM_010155	Erf	0.146999	0.252915	0.148473	0.175823	0.133718	1005.63	1026.27	945.479	951.68	1002.91	11.3839	12.0205	6.5445	11.6384	51.8035	45.2506	41.5781	37.8967
17_+_67458	NM_026170	Ergic1	0.610332	0.700223	0.68304	0.902642	0.896152	1444.67	1357.09	1243.01	1336.04	1485.44	130.58	128.517	120.681	173.333	164.45	114.043	90.8279	96.3026
8_-_67276	NM_026067	Eri1	0.496237	1.49476	1.57245	1.70614	1.3386	1218.42	1211.35	1393.71	1295.89	1227.63	41.9643	24.9361	26.178	17.5141	10.4967	5.50738	4.56375	3.11936
7_-_71151	NM_027698	Eri2	0	0.0928944	0.138381	0.0257246	0.0238871	3218	2960.78	3391.62	3125.4	3203.75	12.0536	6.13811	7.8534	7.34463	10.5656	4.85221	3.58029	1.55719
8_-_234086	NM_001034862	Erich1	0.375339	0.632149	0.829696	3.16075	0.266168	801.116	735.913	860.128	842.361	902.769	10.2679	9.97442	9.42408	11.7514	2.87987	2.52454	3.93858	4.08536
11_-_66753	NM_025745	Erlec1	Inf	2.88519	10.6296	7.59259	3.20576	155.882	147.794	152.578	156.73	152.638	61.8304	62.7877	84.2932	100	28.6052	37.2456	37.7806	50.7513
19_-_226144	NM_145502	Erlin1	2.27162	0.488838	0.60946	1.14637	1.60439	1833.56	1879.12	1839.54	1638.9	1949.65	18.5268	13.6829	10.2094	12.7684	15.9268	11.4572	11.2505	11.5463
8_+_244373	NM_153592	Erlin2	0.790826	0.142008	0.139761	0.187976	0.418305	2644.77	2648.49	2644.15	2651.54	2644.72	33.7054	28.5166	29.0576	30.3955	22.1841	16.569	13.3501	11.8478
19_-_226090	NM_001081213	Ermp1	2.11023	1.12241	0.787492	1.51961	0.806508	1041.51	521.167	581.476	802.611	1061.54	4.01786	2.68542	4.71204	5.64972	17.9617	9.52819	7.14233	5.24546
11_-_78943	NM_023913	Ern1	0.40455	0.152535	0.146146	0.124299	0.185419	4063.97	4129.86	3983.89	4047.75	4070.14	6.25	4.60358	8.37696	6.32768	3.24985	2.31209	2.5606	2.64194
14_-_50527	NM_015774	Ero1l	1.97061	6.60214	3.72583	2.88539	1.47606	1199.92	1531.4	1265.17	1467.01	1214.32	33.0357	56.5217	57.0681	81.6949	40.458	60.2924	46.6802	39.3672
4_-_76299	NM_029572	Erp44	0.0282135	0.0925926	0.0595596	0.0691358	0.0881955	338.53	334.287	315.093	298.632	318.059	56.0268	53.8363	66.2304	67.5706	49.5244	52.1927	58.8546	51.3278
18_-_77805	NM_001081222	Esco1	0.0958889	0	0.158951	0	0	908.126	926.373	927.772	920.044	913.461	11.3839	12.9156	11.7801	10.0565	8.26763	9.33507	9.35817	5.41263
11_-_68145	NM_026576	Etaa1	0.0493506	0.518182	0.299394	Inf	Inf	362.821	436.359	434.338	399.03	328.554	20.5357	9.07928	8.63874	8.36158	4.81172	2.41768	1.79217	1.03539
18_-_225363	NM_144866	Etf1	0.263674	0.282361	0.231203	0.209368	0.281364	1659.21	1716.72	1713.45	1701.03	1750.56	218.304	181.458	170.942	136.61	87.5225	91.4299	76.2567	45.8369
2_+_208618	NM_001177631	Etl4	1.29682	0.937056	0.901015	0.58566	2.85509	1293.39	1244.53	1275.48	1270.78	1288.29	7.58929	12.0205	8.37696	17.6271	3.72777	3.94035	1.76407	3.58968
9_+_23871	NM_011808	Ets1	2.56868	4.73961	4.16285	6.52418	5.03759	2699.97	2719.99	2664.46	2877.98	2913.11	94.1964	80.9463	71.466	37.7401	25.6418	27.4779	15.7856	8.96358
12_+_14009	NM_007960	Etv1	0.363794	0.416784	0.655779	0.614424	0.411505	2576.67	3110	3110	2881.43	2790	3.125	3.06905	5.49738	6.77966	1.91209	1.95532	1.71681	1.88251
5_-_14020	NM_007964	Evi5	3.16485	1.23772	2.01151	3.1934	3.39478	3083.41	3144.47	3124.3	3152.86	3117.95	31.4732	27.3657	25.6545	31.7514	19.04	15.3699	11.8032	9.57618
13_-_211446	NM_177333	Exoc3	0.0258134	0.0788172	0.0867253	0.106986	0.0448936	375.946	312.458	434.931	479.527	552.156	39.9554	37.0844	38.7435	49.2655	16.0006	14.623	13.4775	13.2775
14_-_105504	NM_207214	Exoc5	0.499064	0.127213	0.241441	0.467155	0.660279	1478.01	1563.02	1696.01	1549.82	1564.85	99.3304	93.8619	84.2932	57.8531	60.786	48.1945	35.9288	21.1673
6_-_75914	NM_177077	Exoc6b	0.0142802	0.0158083	0.0275798	0.0287521	0.0676875	3047.49	2898	3121.58	3041.55	3403.28	9.82143	14.4501	11.5183	14.1243	13.4003	11.6724	8.52247	8.90619
11_-_53413	NM_001162872	Exoc7	0.0454902	0.188122	0.19937	0.116362	0.0436779	476.507	184.961	263.333	239.542	421.355	22.7679	36.445	31.4136	42.5989	15.4182	17.2596	14.093	20.555
8_-_102058	NM_198103	Exoc8	0.0875282	0.0926798	0.0578473	0.0867429	0.131839	2532.14	2558.86	2576.15	2658.69	2568.43	19.4196	27.2379	17.5393	17.1751	12.8969	12.2801	11.0644	12.9132
9_+_208194	NM_001172136	Exog	1.98297	1.41912	0.913645	1.23493	1.41858	1193.17	1248.91	1209.8	1241.67	1326.31	4.91071	3.19693	2.35602	3.61582	4.80337	3.30691	3.55326	3.24307
19_-_66583	NM_025644	Exosc1	0.0508413	0.0398777	0.0356803	0.028141	0.0615016	438.487	445.13	450.379	387.58	406.984	46.2054	36.445	31.1518	28.0226	29.9546	23.6938	27.4603	17.6526
4_-_66362	NM_025513	Exosc3	0.666667	2.66667	3	6	7.6	167.26	165.958	163.071	162.414	164.556	53.125	32.2251	30.3665	27.4576	16.9153	13.053	10.1539	14.6809
15_+_109075	NM_175399	Exosc4	0.0401555	0.0643583	0.0578011	0.0969053	0.0446883	482.841	417.909	463.102	574.346	525.608	24.5536	26.2148	21.2042	29.3785	16.4666	21.4641	24.4608	26.4371
3_+_50911	NM_019393	Exosc9	14.3243	6.48649	5.90482	12.2346	3.68243	181.962	191.885	190.326	188.98	182.432	97.0982	87.9795	80.1047	78.5311	23.2782	21.4131	20.7858	22.1882
3_+_58193	NM_001163515	Extl2	2.04352	2.09123	2.31342	3.22386	2.50877	1317.01	1299.67	1332.56	1317.86	1309.34	18.75	19.3095	20.1571	26.4407	15.6761	12.4835	10.5676	12.4091
4_+_14050	NM_010166	Eya3	0.168869	0.302862	0.233822	0.243255	0.266376	1623.41	1624.05	1565.54	2008.55	2031.87	14.5089	15.7289	12.8272	10.3955	21.6695	16.6964	10.156	10.9689
10_-_14051	NM_010167	Eya4	Inf	5.34206	12.1925	6.15908	6.78756	2131.12	2371.53	2448.71	2275	2354.45	4.24107	4.34783	5.49738	6.77966	3.27383	5.55635	4.75685	4.96476
17_-_22350	NM_009510	Ezr	2.1756	1.16408	2.53177	1.59091	2.01774	884.41	853.412	932	885.2	902.894	22.7679	13.4271	10.4712	10.6215	12.9609	6.8108	3.90159	4.54918
1_+_16456	NM_172647	F11r	0.151483	0.0445792	0.125277	0.0469255	0.0390068	942.362	915	993.133	963.833	984.104	3.79464	17.2634	18.8482	23.9548	2.20371	7.32132	4.52338	6.74239
7_-_14082	NM_010175	Fadd	0.0751378	0.166094	0.249557	0.234759	0.226492	1177.75	1070.03	1048.66	1188.81	1262.32	7.8125	9.84655	8.11518	8.70056	3.74604	3.15349	2.53934	2.39865
19_+_60527	NM_021890	Fads3	0.329365	0.263573	0.313583	0.383849	0.370489	818.885	770.231	770.495	797.934	805.973	90.8482	168.031	126.44	114.915	111.071	177.225	143.835	106.144
13_+_76577	NM_178397	Faf2	0.187068	0.078462	0.0849876	0.158127	0.164999	500.811	490.955	497.013	499.217	497.94	9.82143	9.97442	12.0419	11.2994	51.7301	45.6467	41.12	44.8117
17_-_68636	NM_023480	Fahd1	4.1843	5.17414	1.95717	2.91552	2.90952	478.56	473.69	472.133	517.196	491.667	15.8482	14.4501	13.3508	11.8644	5.39469	6.06786	7.27196	9.97569
9_+_23873	NM_011810	Faim	2.02236	0.829167	0.710714	0.829167	2.92972	305.545	302.145	298.417	298.61	292.893	24.5536	22.3785	26.178	16.8362	9.99314	10.6688	15.0897	15.1136
7_+_67148	NM_025997	Fam103a1	0.0528629	0.0733078	0.0419209	0.0341986	0.0400906	546.406	607.227	613.025	588.957	572.906	63.8393	51.9182	49.2147	51.7514	11.5418	15.8458	15.9353	19.272
19_+_107373	NM_026640	Fam111a	0.0535649	0.0434371	0.072803	0.0419866	0.552108	1157.4	1157.55	1158.19	1156.85	1158.61	47.9911	27.6215	31.4136	23.5028	68.3076	31.4507	42.7202	20.839
1_+_72750	NM_001037725	Fam117b	2.22128	0.503448	0.566947	1.08767	1.95854	2927.04	2940.03	3055.31	2777.47	3015.7	22.9911	28.2609	20.9424	24.5198	12.4417	13.1694	15.3208	12.3242
9_-_109229	NM_001286604	Fam118b	0.0759274	0.0417601	0.0810637	0.14355	0.180647	525.504	507.086	517.67	513.529	513.831	7.8125	14.7059	8.90052	9.37853	7.95321	8.95015	9.87163	7.64763
14_+_629059	NM_001243857	Fam124a	2.13728	1.91919	4.38361	4.97245	8.07556	1431.64	1494.46	1733.07	1668.44	1808.3	2.90179	1.91816	2.35602	7.57062	5.06192	3.72057	5.51498	7.05396
5_-_84652	NM_053090	Fam126a	0.911343	0.1297	0	0.146292	1.26057	3738.67	3746.82	3743.76	3734.59	3747.73	3.79464	4.34783	4.45026	4.97175	12.3057	9.7708	8.82895	7.39815
1_-_213056	NM_172513	Fam126b	2.97736	0.83134	1.05594	2.11122	2.54747	6444.97	6480.52	6131.76	6162.84	6108.3	8.92857	6.26598	8.11518	9.03955	6.4571	4.89175	3.94696	2.36813
1_+_63913	NM_022018	Fam129a	0.400259	0.546919	0.523754	0.479618	0.652709	2249.85	2209.71	2353.39	2277	2466.44	17.1875	58.6957	59.9476	93.5593	11.7153	28.9065	17.5033	17.1383
1_-_68187	NM_026604	Fam135a	0.404344	0.249433	0.137845	0.15786	0.361248	755.92	745	788.061	769	767.94	16.2946	16.8798	13.089	18.7571	16.8851	11.8899	5.92754	5.74766
18_-_225358	NM_146084	Fam13b	0.555383	0.533227	0.641267	0.551924	0.541583	1471.08	1815.16	1640.75	1666.02	1625.73	27.2321	25.4476	32.4607	25.5367	41.8932	41.2495	23.2795	14.5692
10_+_71721	NM_001143777	Fam13c	1.29699	0.603499	0.704082	1.32346	1.13478	1353.07	1310.75	1282.12	1211.86	1271.82	2.67857	4.09207	5.75916	11.2994	1.21884	2.79875	2.15679	3.75673
8_-_212326	NM_153535	Fam149a	0.0782433	0.209338	0.276646	0.295875	0.13801	415.336	1051.12	926.173	677.962	876.807	32.8125	34.0153	34.8168	49.2655	20.5078	17.5306	16.2857	13.806
3_-_229488	NM_172682	Fam160a1	Inf	Inf	Inf	Inf	1.12736	790.388	798	736.8	783.429	867.36	1.78571	6.39386	3.66492	5.64972	1.87925	2.70741	1.98583	2.38553
7_-_74349	NM_001242365	Fam160a2	0.0269221	0.931188	0.399081	0.432337	0.0463579	1690.83	2686.49	1867.46	1804.22	1759.78	9.15179	6.64962	9.42408	8.36158	9.12226	8.33424	5.39668	5.96616
19_+_226252	NM_145505	Fam160b1	15.5327	2.04161	3.0759	3.62095	3.06768	2778.07	2765.66	2746.18	2646.61	2841.24	19.4196	24.0409	22.2513	24.6328	12.3824	12.71	8.16415	6.42745
1_+_67698	NM_026321	Fam174a	0.695082	0.124706	0.10844	0.0779412	1.64506	509.46	506.674	494.281	480.907	488.005	19.8661	17.2634	14.1361	21.6949	4.34231	4.10976	3.75439	7.24488
19_+_226151	NM_001081225	Fam178a	3.20805	1.12861	1.52735	1.45081	2.78272	2724.53	2868.06	2664.81	2629.53	2717.51	14.5089	10.6138	8.90052	8.92655	12.8403	7.42116	6.44412	5.19584
12_+_328108	NM_177805	Fam179b	0.909742	0.756838	0.354005	0.495244	0.33255	776.433	792.484	809.842	802.035	793.735	28.5714	25.8312	22.2513	20.904	12.3406	10.9127	9.82095	7.69982
2_-_66960	NM_024185	Fam188a	2.63819	0.833162	0.903805	0.615401	1.58412	682.808	638.702	661.146	637.037	679.762	68.0804	42.8389	49.4764	42.7119	43.5224	28.2531	28.679	23.3621
5_+_231128	NM_001243123	Fam193a	0.214525	0.124574	0.185507	0.0808847	0.336162	700.248	687.509	689.493	698.581	696.644	12.7232	9.07928	8.11518	10.1695	15.9801	9.92982	13.7584	15.7025
3_+_68659	NM_133187	Fam198b	40.4469	4.04791	4.497	4.93962	4.06015	1993.68	2207.32	2110.37	2209.71	2184.46	250.893	304.092	306.283	225.311	190.484	215.872	143.669	76.0586
8_+_67922	NM_026455	Fam32a	0.122666	0.107989	0.126987	0.155142	0.237321	1022.75	1075.78	1084.95	1073.4	1064.09	35.9375	53.0691	47.1204	53.8983	30.1701	32.8043	33.3268	32.3594
6_-_27999	NM_138587	Fam3c	0.239008	0.209641	0.221429	0.272533	0.678386	1175.81	1104.44	1092.11	1180.39	1136.52	78.3482	65.601	97.3822	87.2316	45.5888	40.1644	47.4548	41.3254
16_+_224093	NM_177632	Fam43a	0.0541105	0	0	0	0.317726	859.737	862.29	860.927	859.013	860.347	13.8393	27.8772	39.0052	37.4011	8.32528	17.4271	19.7803	24.131
9_-_212943	NM_001160379	Fam46a	0.263069	0.791109	0.733919	0.707811	0.325239	3686.82	3737.29	3562.42	3502.17	3812.87	3.79464	7.03325	9.42408	7.57062	7.16465	10.8615	5.93931	6.27362
12_+_76820	NM_029758	Fam49a	Inf	Inf	1.05607	1.81928	1.28681	2561.03	2036.56	2641.53	2156.86	2894.58	2.00893	1.91816	5.75916	2.93785	2.17922	2.47478	2.20519	2.56236
9_-_235461	NM_172772	Fam63b	1.42063	4.2006	3.59973	2.46366	4.08729	5535.32	5482.36	5427.01	5338.14	5612.45	22.3214	24.9361	31.1518	32.8814	6.0313	7.84682	7.05737	5.6548
5_-_67266	NM_026062	Fam69a	0.319212	0	0.513019	0.239409	0.427516	403.5	359.125	386.933	403.5	389.846	3.57143	5.75448	6.28272	4.40678	3.55657	4.78972	5.13609	4.69646
9_+_72826	NM_176836	Fam76b	1.24971	1.02471	1.30092	0.84569	0.981423	2176.22	1827.54	1934.8	1981.42	2090.29	29.9107	10.9974	20.4188	10.0565	13.1903	9.83654	9.6867	7.69785
2_+_71878	NM_027975	Fam83d	1.21212	0.152362	0.0999001	0.378788	0.852273	454.421	462.159	457.615	456	457	33.7054	16.624	18.8482	10.1695	17.7899	8.64982	12.1915	6.19426
16_-_70511	NM_027446	Fam86	1.12815	2.52659	2.43625	2.43794	0.552122	457.556	482.349	538.809	448.541	467.483	19.1964	16.7519	19.3717	23.1638	9.55657	9.87463	12.0517	17.157
7_-_100040608	NM_001115087	Fancf	0.0135579	0.0305817	0	0	0.0359944	659.509	694.727	703.283	666.857	668.899	9.82143	13.555	14.6597	15.5932	5.51704	5.11044	7.4156	8.93111
7_+_67420	NM_001285831	Far1	2.06258	1.03448	0.987839	2.37548	1.57344	1827.48	2149.18	2145.79	2128.55	2147.89	105.134	75.3197	74.6073	66.3277	77.8905	49.9319	47.6782	41.9847
13_+_69577	NM_027123	Fastkd3	0	1.23002	0.287006	0	0.861017	254.186	254.525	253.383	252.417	255.305	31.4732	30.6905	31.4136	18.5311	9.95696	11.7657	10.058	6.43906
11_-_217335	NM_172571	Fbf1	3.73259	1.54578	2.06527	5.81044	3.2239	1027.05	1015.64	1012.96	1001.4	1015.29	10.4911	11.6368	7.8534	13.2203	8.70529	5.2096	6.57396	10.7105
2_-_14118	NM_007993	Fbn1	3.15882	2.42157	2.04492	1.94606	2.62937	894.744	896.731	890.36	893.411	900.254	306.473	461.637	542.67	677.062	211.74	241.58	106.018	105.497
6_+_101358	NM_133940	Fbxl14	0.0303866	0	0.0260813	0.0260279	0	1631.74	1606.26	1644.81	1637.24	1644.49	7.58929	8.18414	6.5445	5.08475	9.08492	6.19689	4.20374	4.87362
17_-_50758	NM_015794	Fbxl17	0.0371775	0.119278	0.150819	0.0253832	0.135244	885.979	967.887	1144.54	1047.38	958.345	15.8482	19.0537	16.7539	25.5367	11.7368	12.206	12.7582	10.1937
7_+_233902	NM_172748	Fbxl19	1.64253	0.572327	0.727379	1.62231	0.790077	1270.29	1199.18	1205.5	1275	1318.24	2.45536	3.06905	3.14136	5.08475	11.5938	13.0711	13.5791	18.2177
9_-_72179	NM_178624	Fbxl2	0.0328795	0.245648	0.146824	0.119811	0.113167	1053.96	908.917	919	997.65	988.143	5.35714	4.21995	5.2356	5.53672	2.63002	3.5838	3.63498	3.90507
11_-_72194	NM_028149	Fbxl20	0.160736	0.408537	0.428117	0.367179	0.411388	2911.83	3440.28	3145.04	4088.26	3564.63	6.47321	10.1023	15.9686	18.5311	5.30773	9.42889	11.0547	11.1501
5_+_231670	NM_145564	Fbxo21	0.945388	0.473428	0.421672	0.529695	1.4175	1547.03	1734.54	1755.68	1731.05	1715.44	8.70536	9.20716	15.445	14.3503	11.5945	10.944	12.6376	16.6442
1_-_67948	NM_175127	Fbxo28	0.997688	0.519883	0.578073	1.08634	1.51939	2156.28	1784.89	2215.84	2152.95	2283.01	29.2411	27.7494	29.0576	27.1186	12.2125	12.5894	13.2531	11.3523
10_+_71865	NM_001168297	Fbxo30	0.141629	0.202245	0.12523	0.0971173	0.160028	970.808	1126.48	1044.02	966.084	1103.49	50.4464	48.0818	46.5969	34.2373	23.6626	21.4684	14.6714	8.17806
15_-_67731	NM_026346	Fbxo32	0.378774	0.486468	0.495621	0.399488	0.557768	3549.87	2955.97	2956.31	2552.83	3684.01	47.7679	14.7059	23.5602	16.7232	20.7807	6.21739	4.78984	3.57866
18_-_107035	NM_134136	Fbxo38	0.127587	0.0453539	0.0297296	0.119951	0.639247	584.412	590	579.077	589.823	590.112	22.0982	24.9361	29.5812	30.1695	18.9975	22.1323	21.7315	19.0435
4_+_213499	NM_172518	Fbxo42	0.233403	0.666299	0.552244	0.399056	0.315547	2007.71	2034.82	1482.6	1955.62	2246.44	16.9643	18.0307	13.8743	15.3672	12.6063	11.1222	6.46841	6.27376
16_-_268882	NM_173439	Fbxo45	2.23587	0.95851	1.18746	1.04832	1.60761	2782.46	2820.09	2805.2	2549.28	2871.52	22.5446	12.9156	11.2565	12.2034	7.36274	4.65552	4.82024	5.23609
7_+_243867	NM_175530	Fbxo46	0.655152	0.551286	0.552511	0.606204	0.518662	829.647	909.621	814.841	859.429	858.022	6.47321	5.6266	5.49738	5.08475	4.18064	3.52515	3.33786	6.1919
8_+_50753	NM_015791	Fbxo8	1.36741	0.178049	0.298494	0.297889	0.648963	611.161	598.347	626.74	610.938	612.463	10.9375	13.2992	20.9424	18.3051	8.01635	8.79673	12.6303	11.0383
3_+_50754	NM_001177774	Fbxw7	2.60577	1.6503	1.42729	1.42312	1.80757	1611.04	1567.97	1590.11	1572.53	1599.77	14.2857	12.1483	11.7801	18.8701	6.64721	7.17179	5.82283	6.1907
5_-_231672	NM_172721	Fbxw8	0.0919558	0.0432572	0.0558401	0.0654424	0.0933086	1768.44	1757.75	1744.57	2065.34	1794.4	31.25	39.7698	36.911	36.4972	27.8889	23.8227	20.2557	15.7333
7_-_14132	NM_010189	Fcgrt	0	0	0	0	0.0640347	188.563	201.969	186.597	188.762	189.474	7.14286	17.7749	16.4921	19.322	12.761	30.3526	44.4088	51.8725
13_-_218503	NM_172591	Fcho2	1.6217	0.594622	0.734354	1.43761	2.2944	2093.1	1947.32	2038.22	1890.1	2163.92	16.0714	11.509	19.1099	12.3164	13.1702	10.3911	8.06672	5.48283
9_-_14148	NM_007996	Fdx1	0.0761099	0.05074	0.0676533	0.0338266	0.138983	123.319	134.613	128.555	178.375	128.981	23.6607	27.8772	27.2251	29.6045	11.0807	10.7553	12.9223	22.8677
9_+_382137	NM_198675	Fdxacb1	Inf	Inf	Inf	Inf	0.441791	300.588	212.222	343.667	625.333	315.5	2.00893	3.06905	1.57068	2.71186	2.57093	2.96292	3.30677	1.7076
18_-_14151	NM_007998	Fech	0.16958	0.151846	0.1966	0.264707	0.474566	1036.64	1079.1	1095.59	1073.36	1038.5	32.5893	39.7698	36.1257	48.2486	20.824	19.2277	18.5763	20.4691
17_+_14154	NM_010192	Fem1a	0.0746622	0.411086	0.489221	0.447269	0.205067	1540.21	2029.25	2103.62	2369.92	1776.08	28.125	24.1688	23.822	21.6949	4.4353	4.0293	2.28356	2.52892
18_-_240263	NM_173423	Fem1c	1.54435	0.463123	0.465858	1.03232	0.709955	1931.98	2025.91	2183.74	2246.23	2044.29	35.4911	31.7136	29.3194	22.4859	19.6562	16.7274	12.8816	8.45842
17_+_14158	NM_008000	Fer	0.0168175	0.0420479	0.0325513	0.013415	0.0135611	631.378	430.588	462.431	548.575	584.061	22.7679	27.8772	29.5812	22.3729	19.9892	23.8403	22.6781	18.5701
14_-_218952	NM_146054	Fermt2	0.665832	1.12869	1.00552	1.03906	0.767652	448.389	424.079	457.899	454.43	491.854	116.295	81.9693	72.5131	64.2938	217.389	142.225	109.623	61.8732
X_+_14163	NM_008001	Fgd1	0	0.108396	0.0325781	0.0779318	0.183439	730.33	732.324	693.5	705.286	734.134	7.58929	4.85934	3.66492	7.57062	8.33577	7.07918	4.24359	6.30837
13_+_14165	NM_008002	Fgf10	9.19207	1.36151	1.36781	2.25574	3.24509	2629.16	2596.2	2586.34	2617.87	2552.54	37.2768	36.1893	27.2251	35.5932	9.61786	9.27096	8.21228	7.21705
3_+_14173	NM_008006	Fgf2	0.612648	1.62489	1.52657	1.523	1.19029	1023.83	1065.88	1003.36	1020.28	1044.61	3.79464	4.21995	4.71204	2.0339	50.1217	37.142	29.4453	17.745
2_+_14178	NM_008008	Fgf7	1.23089	0.575441	0.770766	0.756596	1.32056	913.663	904.573	901.18	895.71	903.94	74.7768	94.3734	131.937	99.322	34.1501	52.4024	79.0905	51.5183
17_+_75296	NM_001197046	Fgfr1op	2.77452	0.68781	0.470202	0.638122	1.13092	1433.44	1328.08	1550.62	1611.4	1557.01	11.8304	12.9156	12.5654	11.1864	8.5951	8.95459	9.12587	4.59381
6_+_67529	NM_026218	Fgfr1op2	0.807236	0.238928	0.328938	0.577486	0.976789	1079.16	1110	1202.2	1296.48	1320.07	64.2857	47.4425	54.712	54.1243	28.7279	27.7169	25.1633	34.4637
7_-_14183	NM_201601	Fgfr2	1.29103	0.630706	0.624182	1.4793	1.52281	1386.12	1225	1358.29	1416.06	1313.42	16.5179	12.2762	8.90052	10.7345	60.2483	39.1147	39.7988	36.5116
3_-_229474	NM_001033301	Fhdc1	0.225202	0.277222	0.246663	0.141471	0.138611	1404.12	904.839	1058.29	1011.05	1414.19	6.91964	5.24297	4.97382	4.85876	10.8301	9.20186	5.19926	3.79862
2_-_67606	NM_026271	Fibin	1.50943	Inf	Inf	Inf	6.23899	1066.52	1059.98	1055.41	1129.77	1093.61	13.8393	34.2711	30.1047	32.2034	2.43986	9.35707	9.1131	8.79971
5_+_231630	NM_001010825	Ficd	2.31434	0.733603	0.667056	0.751682	1.06065	1404.99	1400.58	1406.81	1409.07	1424.74	10.0446	10.1023	11.7801	14.6893	3.11985	2.57622	2.95709	5.04646
10_-_103199	NM_133999	Fig4	0.147841	0.197569	0.106142	0.0290154	0.438304	343.791	333.162	338.875	339.731	346.172	8.25893	6.13811	6.80628	10.5085	11.2836	11.78	11.2533	10.3721
16_+_78749	NM_001040397	Filip1l	0.100641	0.0989875	0.1303	0.00826053	0.389275	343.071	344.395	343.281	344.601	343.438	130.134	65.4731	58.377	56.2712	125.505	59.6281	42.5053	30.4142
5_+_66899	NM_001159574	Fip1l1	0.0604235	1.05285	0.447897	0.226892	0.140053	713.349	496.055	570.47	649.43	893.929	97.9911	73.5294	74.3455	66.7797	20.1866	19.2607	18.2366	20.1954
2_-_228859	NM_173397	Fitm2	0.584223	0.722373	0.678382	0.753214	0.899524	2891.67	2975.79	2711.31	3123	2853.11	7.36607	7.54476	4.71204	8.13559	8.17122	6.13456	4.21488	3.55572
6_-_14228	NM_010219	Fkbp4	2.07157	1.51304	1.88087	4.5813	4.07898	319.554	291.754	349.059	309.128	330.895	105.134	79.9233	63.6126	61.2429	43.52	30.8158	36.1113	27.6098
6_+_27055	NM_012056	Fkbp9	1.79882	0.976503	1.15789	1.48471	1.68294	1021.78	1000.27	1008.36	1016.34	1012.07	190.625	200.128	212.304	275.367	125.151	131.095	104.182	119.83
12_+_399558	NM_201518	Flrt2	0.509543	0.417882	0.466194	0.703378	1.09251	4235.24	4171.47	4151.98	4167.13	4170.44	230.804	99.7442	101.832	140.565	156.171	47.76	19.5522	15.1832
2_-_71436	NM_001172160	Flrt3	0.321105	0.656481	0.223801	0.492361	2.2622	1511.72	1521.61	1505.12	1513.47	1516.53	6.91964	7.16113	4.97382	9.60452	6.18765	3.47305	3.05295	2.87322
17_-_224613	NM_153791	Flywch1	9.51429	37.7143	10.7786	37.8	9.04286	2595.29	2688.46	2721.61	2683.15	2702.84	14.9554	21.7391	21.2042	18.7571	17.4063	18.2648	18.1878	18.1978
2_+_14260	NM_010230	Fmn1	0.0991636	0.590089	0.361196	0.206611	0.298252	4482.13	4832.04	5271.88	5343.46	5438.36	49.7768	41.8159	47.644	39.661	32.7044	17.129	16.5515	6.55804
2_+_71409	NM_172409	Fmnl2	1.94211	1.1743	0.884489	2.74756	0.987186	1839.55	1750.44	1865.04	1767.9	1855.79	20.0893	16.7519	20.9424	25.6497	13.2043	9.21561	17.272	11.9931
X_+_14265	NM_008031	Fmr1	1.09391	0.389101	0.556403	0.668154	1.41452	2138.01	2164.03	2174.88	2188.69	2167.16	79.6875	59.0793	49.7382	54.0113	28.0542	23.5097	15.1801	9.73545
2_+_55935	NM_018828	Fnbp4	0.230233	0.0747244	0.079877	0.102585	0.436238	1080.74	1111.32	1071.96	1016.11	1087.96	18.0804	17.0077	19.1099	14.1243	23.5267	17.1072	9.42503	9.50082
5_-_64339	NM_022424	Fndc4	0.0426852	0.24728	0.304132	0.303393	0.657352	858.875	992	830.414	745.719	761.612	8.70536	7.41688	8.37696	5.53672	3.05792	2.63978	2.97746	4.02207
3_-_329679	NM_001162999	Fnip2	6.09649	0.515715	0.781459	2.68214	3.13856	3445.85	3366.69	3383.44	3337	3411.61	5.80357	9.20716	10.4712	8.58757	6.69248	9.94797	12.5227	4.69548
19_+_14283	NM_010235	Fosl1	0.0598179	0.0653777	0.103895	0.0987356	0.101993	808.51	766.445	953.469	840.981	814.549	47.0982	30.5627	26.9634	16.0452	10.9308	7.72765	4.20386	2.57906
5_+_14284	NM_008037	Fosl2	2.05747	0.291484	0.292746	0.5609	6.41541	4627.39	4624.39	4619.63	4622.3	4624.88	145.089	128.261	159.162	155.932	36.2889	26.5031	20.4609	22.0071
13_+_17300	NM_008592	Foxc1	0.272744	0.0917516	0.205477	0.176123	0.275886	1099.53	1163.75	1106.24	1215.97	1043.17	22.0982	17.1355	23.2984	35.4802	3.99109	3.59471	5.22653	8.90407
13_+_14238	NM_010225	Foxf2	0.0161168	0.0425057	0.044631	0.0773604	0.0293032	954.3	962.521	903.926	911.745	890.311	10.7143	12.0205	13.3508	8.36158	3.50094	5.8294	5.11227	4.89372
11_+_68837	NM_001080932	Foxk2	0.784249	0.458752	0.375349	0.525147	0.623206	2074.06	2021.72	2007.31	2066.89	2073.67	80.1339	70.9719	67.0157	61.0169	47.9324	45.6244	32.5925	27.8423
6_-_108655	NM_001197322	Foxp1	0.242811	0.645955	0.65521	0.524892	0.462665	3028.13	2547.39	2755.87	2283.76	3121.34	34.1518	36.5729	38.2199	31.1864	43.4053	48.7811	42.6293	40.8928
6_+_114142	NM_001286607	Foxp2	0.331722	0.173072	0.176918	0.487428	0.127893	3203.5	3256.44	3238.09	3304	3287.8	3.57143	6.01023	6.02094	5.64972	4.2586	6.74144	5.36612	2.52192
17_-_74123	NM_001110825	Foxp4	1.06694	0.645374	0.76101	0.79559	0.738889	983.782	960.571	961.981	968.493	978.178	7.8125	13.1714	18.5864	19.096	12.9276	11.6957	9.50917	10.5278
10_+_14302	NM_010237	Frk	0.341758	0.515295	0.803696	0.528082	0.786155	2199.96	2282.28	1925.38	2202.25	2124.15	16.7411	12.532	14.3979	17.5141	7.80525	5.57087	4.56811	4.1004
19_-_67457	NM_026169	Frmd8	0.823477	0.354759	0.342547	0.151883	4.73044	1353.82	1355.15	1355.94	1356.81	1352.16	34.5982	37.0844	30.6283	29.2655	15.5587	16.3236	13.0685	10.713
3_+_20321	NM_009146	Frrs1	0.425382	0.844977	0.720462	0.551346	0.59887	2207.97	1716.82	1964.4	2299.98	2132.93	20.7589	27.11	24.3455	21.5819	13.849	19.9144	15.9009	15.6229
10_-_327826	NM_177798	Frs2	0.313369	0.0632723	0.077536	0.161429	0.271586	4033.69	3975.14	3956.69	4021.56	4039.38	54.0179	48.8491	58.9005	52.3164	26.9947	20.4142	11.6419	8.95961
5_-_72313	NM_028194	Fryl	2.84606	1.05155	0.892097	1.2576	2.41332	1728.26	1621.76	1567.32	1685.56	1694.92	11.3839	10.4859	11.7801	9.60452	13.2732	8.16767	10.4837	13.1905
16_+_14314	NM_008047	Fstl1	4.07307	1.39475	1.42453	2.0855	2.64253	2390.51	2377.16	2301.61	2401	2412.63	425.893	407.033	512.565	636.836	351.763	403.753	336.487	430.98
3_+_51886	NM_057172	Fubp1	0.19621	0.395019	0.310075	0.457093	0.12061	1560.5	1192.33	1193.59	1726.46	1664.14	93.75	43.2225	45.8115	33.6723	49.8596	19.7827	18.4303	14.0816
10_+_66848	NM_025799	Fuca2	0.154602	0.105917	0.0847337	0.209817	0.766288	721.567	728.79	720.197	722.039	720.509	18.0804	37.7238	40.0524	45.5367	15.8839	33.9679	34.6241	37.5447
X_-_72018	NM_028058	Fundc1	0.209046	0.20856	0.200263	0.176756	0.278603	1205.54	1354.89	1219.34	1222.74	1288.69	30.5804	25.4476	24.0838	28.4746	24.0592	22.5719	32.4203	24.1497
X_+_67391	NM_026126	Fundc2	0.0404751	0.0508273	0.0417601	0.0401321	0.0392715	2023.93	1892.06	2034.08	1853.08	2003.58	7.58929	13.555	12.8272	15.4802	37.9762	44.0741	40.4232	42.7168
14_+_73068	NM_028428	Fut11	Inf	0.465521	1.17895	0.694149	0.132219	616.966	743.833	1011.83	935.15	989.111	12.0536	12.1483	15.7068	15.2542	7.96555	7.46187	6.1685	4.39924
19_-_14297	NM_008044	Fxn	0.745994	1.20406	0.889957	Inf	0.314103	220.509	113.926	135.375	108.348	85.68	6.02679	7.16113	6.02094	2.82486	6.46986	5.06194	6.5261	4.43553
9_-_17281	NM_001110253	Fyco1	0.231146	0.21663	0.259344	1.0387	2.79227	2293.38	2624.66	2798.66	2529.93	2712.9	13.6161	14.7059	22.5131	27.0056	9.03358	5.54767	3.49131	4.18122
16_+_69823	NM_027226	Fyttd1	4.62025	2.93748	3.1583	4.34706	3.31705	2223.77	2244.12	2200.3	2250.26	2241.69	58.0357	49.4885	53.4031	57.0621	39.3767	34.8313	31.6671	21.175
11_+_57265	NM_020510	Fzd2	1.08122	0.0788888	0.277763	0.513779	0.476062	1575	1579.63	1578.37	1592.82	1583.05	22.0982	47.0588	39.7906	51.6384	20.0274	29.1772	22.773	27.3444
7_+_14366	NM_008055	Fzd4	3.09798	1.39109	0.704157	2.57432	1.64109	3387.66	3674.24	2432.47	3454.88	3155.1	3.79464	7.54476	8.90052	6.77966	3.12205	4.31229	5.74335	4.91541
18_+_14370	NM_008058	Fzd8	0.233387	0.125646	0.104285	0.146587	0.250322	844.873	953.143	1072.04	972.806	1078.79	26.5625	14.3223	17.5393	29.1525	5.36895	4.96493	4.39217	6.04563
10_-_56371	NM_019757	Fzr1	2.00007	1.41519	1.07021	0.801799	0.944005	473.911	570.135	546.441	508.882	523.5	8.25893	11.8926	8.90052	7.23164	21.4156	17.9517	24.3106	20.899
12_+_217558	NM_001167964	G2e3	1.09674	1.54757	2.34802	1.67834	0.897332	2444.33	2563.45	2762.83	3030.08	3097.02	27.4554	11.7647	19.8953	10.8475	18.924	9.86603	4.10033	2.70369
5_-_23881	NM_001080795	G3bp2	5.15734	3.6493	4.43495	8.5215	5.59197	1887.46	1915.01	2074.73	1950.81	2064.36	73.4375	76.9821	68.3246	52.6554	51.9833	52.8258	59.3152	41.2196
7_+_14389	NM_001162477	Gab2	0.499561	0.137453	0.297815	0.223361	1.90691	3198.61	3146.93	3208.95	3153	3185.9	12.5	10.1023	6.28272	10.5085	5.04769	3.93017	4.56862	3.69976
8_+_93739	NM_026693	Gabarapl2	0.184657	0.0814202	0.0942027	0.139053	1.2819	487.91	464.537	475.827	481.431	492.615	148.438	130.818	153.141	173.785	46.0428	53.2377	89.2569	114.379
16_+_14390	NM_008065	Gabpa	0.866987	0.833143	0.83075	1.46784	1.75227	1480.65	2190.08	1986.67	2183.21	1930.67	34.8214	21.7391	40.0524	22.8249	39.4489	34.2237	21.2457	16.4254
3_-_213054	NM_172512	Gabpb2	3.91026	0.833932	0.900044	2.47532	3.78319	6734.75	6554.26	6549.51	6483.33	6667.86	10.4911	6.52174	10.2094	5.53672	9.19227	5.93321	6.33304	5.95869
5_+_14400	NM_008069	Gabrb1	0.123873	0.304064	0.314231	0.147018	0.33324	2860.88	2815.23	2726	3654	2409.64	2.90179	3.06905	2.6178	1.24294	7.18602	4.28864	4.70661	3.54511
10_+_17873	NM_008655	Gadd45b	1.04334	0.240228	0.504048	0.471558	0.627637	514.825	426.493	466.861	498	506.571	16.2946	20.2046	20.9424	15.8192	7.20715	8.64362	9.38206	10.2713
12_-_14420	NM_008079	Galc	0.0148846	0.0108252	0.0439375	0.0132308	0.0396923	1709.13	1703.8	1654.68	1670	1702.5	13.3929	14.3223	12.0419	10.3955	11.0179	9.38445	11.8047	11.6551
18_+_14423	NM_013814	Galnt1	2.10518	1.50105	1.58654	1.98629	2.71519	1411.27	1360.75	1418.58	1479.89	1405.59	54.0179	51.5345	56.8063	56.9492	57.7287	41.1011	37.3109	29.8072
11_+_171212	NM_134189	Galnt10	1.18901	0.570033	0.761169	1.08575	1.38161	1896.52	1890.28	1914.42	1955.13	2007.89	18.9732	35.6777	23.5602	47.1186	29.3378	42.4715	30.4257	32.3598
2_-_66691	NM_025709	Gapvd1	3.15589	0.748284	0.940625	1.35071	1.26713	1596.86	1607.96	1598.24	1528.55	1619.35	40.1786	44.3734	32.7225	37.8531	27.0882	22.2439	14.6849	12.9599
13_-_14451	NM_008086	Gas1	2.16331	0.478178	0.53945	0.78992	1.15366	1232.98	1303.67	1235.12	1260.08	1270.82	28.125	46.0358	69.6335	191.299	13.5376	19.9064	36.196	87.3917
7_+_14453	NM_008087	Gas2	0.0994477	0.0224084	0.0312485	0.158247	0.19678	1051.2	1033.84	1045.28	1023.69	1043.65	24.7768	44.3734	29.5812	82.2599	13.7326	27.449	25.557	43.0977
11_+_14457	NM_001277080	Gas7	2.41566	1.21505	1.27173	1.98349	1.62483	4420.02	5091	4513.16	4864.63	5046.36	6.91964	10.8696	9.94764	9.15254	7.9728	9.19896	9.71356	7.8569
6_+_14461	NM_008090	Gata2	0.659512	0.250361	0.177292	0.155656	0.310223	1428.2	1450.07	1480.51	1480.24	1459	15.4018	8.69565	7.59162	7.9096	6.96066	4.10755	3.90884	3.47263
5_-_67210	NM_026033	Gatad1	0.237354	0.151612	0.118125	0.167854	0.305868	901.561	878.983	845.375	875.514	899.672	107.589	87.3402	94.7644	88.8136	50.7264	42.78	49.6996	46.6025
3_+_14466	NM_008094	Gba	0.0860676	0.25861	0.331589	0.882175	0.0946096	813.86	582.194	492.724	690.909	527.852	27.6786	51.9182	46.0733	48.0226	57.1129	89.6579	79.3288	75.5596
5_+_14467	NM_008095	Gbas	0.228217	0.0938491	0.0728801	0.0445783	1.00415	1132.98	1131.3	1134.12	1145.28	1140.94	27.2321	32.6087	35.8639	34.9153	17.7054	19.8829	19.0129	18.9663
6_-_74375	NM_028900	Gcc1	0.227791	0.439873	0.38828	0.3552	0.312655	1502.21	1595.43	1556.71	1512.14	1607.88	12.0536	14.578	15.445	18.6441	5.77175	6.5477	7.0063	3.75754
10_+_70297	NM_027375	Gcc2	1.07757	0	0	0.0897973	1.22262	1409.85	1411.17	1417.06	1414.91	1416.82	6.69643	10.9974	14.3979	12.6554	6.33024	8.17745	9.67508	8.05112
8_-_270076	NM_008097	Gcdh	0.257088	0.0467432	0	0.119229	0.0685567	452	467.862	428.364	431.286	462.13	6.47321	7.03325	14.6597	8.70056	4.61043	4.70948	6.16109	6.51579
9_+_14629	NM_010295	Gclc	0	0.0508692	0	0.0311482	0.494075	1159.98	1163.77	1164.99	1169.41	1168.06	29.4643	11.3811	18.0628	16.1582	19.4919	12.6232	11.3272	7.2927
3_+_14630	NM_008129	Gclm	0.116541	0.126199	0.156988	0.147851	0.143534	1060.31	985.744	1045.17	1047.4	1237.54	81.9196	49.1049	59.4241	39.322	37.8156	27.9105	24.2535	18.0229
10_-_14561	NM_010272	Gdf11	0.839091	0.466898	0.540543	0.891421	1.08674	2637.98	2560.53	2586.38	2607.4	2638.18	15.1786	23.6573	28.7958	30.7345	6.82964	7.51594	6.29704	8.97517
4_+_242316	NM_013526	Gdf6	0.193016	0.0357437	0.0780101	0.0618309	0.196339	2144.62	1994.35	2215.12	2103.6	2116.9	5.13393	15.9847	10.4712	6.55367	3.15296	10.2473	6.55697	3.70381
4_+_14579	NM_010276	Gem	0	0.292502	0	0	0.0643505	1104.44	1179	1047.76	1023.11	1130.84	2.67857	4.21995	4.71204	4.29379	3.73563	4.22018	5.49888	5.6039
11_-_216766	NM_001166671	Gemin5	0.128794	0.252634	0.424852	0.520542	0.507369	672.036	812.685	883.185	798.266	784.889	24.7768	13.8107	16.7539	12.2034	14.9724	8.12563	5.68681	2.68447
7_-_69731	NM_027189	Gemin7	1.74783	0.803388	0.721877	1.06924	1.38097	370.376	392.795	373.301	374.787	382.07	33.7054	37.3402	31.9372	32.0904	48.5447	49.7308	71.9126	96.193
12_-_209334	NM_177331	Gen1	0.294222	2.53767	3.31	1.1585	0.9268	2245.79	2021.59	2082.41	2082.41	2017.9	12.0536	4.34783	4.45026	4.51977	7.51119	3.12771	2.40909	1.15885
5_+_67604	NM_001163316	Get4	0.127447	0.106759	0.134687	0.158932	0.153091	608.949	523.495	564.175	629.863	635.28	45.0893	49.6164	47.9058	42.7119	52.5841	51.3554	54.8114	42.3825
17_-_11692	NM_023040	Gfer	0.0975057	0.0557845	0.0623474	0.0720459	0.0568783	321.105	265.091	252.95	260.757	354.982	51.5625	48.2097	44.2408	56.2712	8.32278	8.85554	11.2126	19.047
6_+_14583	NM_013528	Gfpt1	0.493377	0.554727	0.642557	0.601321	0.726823	3758.19	3624	3662.46	3710.88	3753.26	52.4554	66.2404	56.0209	70.9605	30.2481	29.4953	12.2963	17.1418
11_-_260302	NM_001252067	Gga3	2.60246	0.589712	0.755406	1.68475	3.6479	1458.55	1465.6	1445.41	1466.16	1457.13	12.9464	8.95141	9.68586	6.89266	7.50865	2.66682	1.83642	2.34879
6_+_56316	NM_019802	Ggcx	0.210807	0.132754	0.166538	0.209224	0.264242	1347.24	1109.63	1209.62	1135.85	1402.79	13.1696	20.5882	21.2042	27.1186	13.7442	22.3014	24.2934	22.0964
11_-_217039	NM_153144	Ggnbp2	Inf	Inf	3.40391	4.0228	0.675624	303.759	306.871	318.694	278.927	309.732	57.1429	70.2046	79.0576	58.1921	48.3213	59.407	68.7436	45.1235
13_-_14593	NM_010282	Ggps1	Inf	Inf	Inf	0.795575	0.693857	2010.39	2147.01	2295.48	2505.24	2361.74	27.4554	31.7136	23.2984	27.2316	13.8232	15.8886	13.6063	10.7022
2_-_14594	NM_001145821	Ggta1	1.0941	0.340981	0.369084	0.743502	1.79432	1851.48	1878.88	1861.24	1866.58	1862.34	42.8571	23.2737	39.5288	34.0113	23.2972	15.7505	14.3677	15.3941
14_-_66092	NM_001199122	Ghitm	0.266104	0.234778	0.280016	0.316954	0.333497	840.941	729.949	799.917	852.048	871.958	135.045	239.003	201.571	201.469	106.161	173.074	151.12	142.28
6_+_317758	NM_174960	Gimap9	0.413462	1.44712	0.275641	0.248077	0.236264	567.333	619.333	394	342	388.222	3.34821	1.02302	1.83246	2.0339	1.64787	1.14272	1.54285	1.16439
1_+_252876	NM_026250	Gin1	1.76577	0	0.882883	NaN	0.882883	253.714	217.222	235.8	223.857	244.448	6.02679	3.19693	1.83246	3.27684	2.3482	2.55056	4.45355	2.17319
8_-_109145	NM_024240	Gins4	0.15749	0.116533	0.226685	0.291071	0.881944	341.864	358.311	351.326	361.887	365.734	30.1339	22.7621	27.7487	22.9379	35.655	26.4856	31.5111	25.5722
8_+_67903	NM_018771	Gipc1	0.225437	0.116891	0.15917	0.168365	0.300599	510.822	505.625	502.775	506.086	504.139	23.2143	31.202	30.3665	24.4068	50.0466	51.8011	71.4701	58.9815
5_-_26431	NM_019834	Git2	0.145012	0.125707	0.219322	0.178717	0.287003	1085.27	896.094	936.714	677.359	1130.39	23.6607	25.4476	16.7539	17.8531	19.5725	17.8542	10.6415	10.2224
14_-_14619	NM_008125	Gjb2	1.55742	0.563409	0.684029	1.05126	1.96532	1370.92	1416.77	1413.65	1414.85	1407.11	27.9018	51.7903	46.5969	23.2768	5.8263	13.0371	8.66831	5.22031
11_-_14615	NM_001159383	Gjc1	0.265471	0.535467	0.26073	0.367393	0.146399	727.06	705.592	643.354	766.429	727.06	15.8482	8.31202	9.1623	5.64972	24.2042	12.1637	9.0984	6.44639
X_-_11605	NM_013463	Gla	0.255378	0.112543	0.168224	0.169961	0.202492	587.441	251.476	443.831	373.457	463.785	4.6875	8.31202	9.1623	8.92655	4.34951	12.9061	18.6622	10.6177
1_-_74577	NM_029010	Glb1l	0.283054	0.590912	0.65365	0.593229	0.310776	1026.51	1422.26	1122.85	1028.14	1074.66	6.02679	6.01023	3.66492	11.5254	6.89767	5.18663	4.83559	6.58157
2_+_74412	NM_028923	Gle1	0.845741	0.778051	0.725293	0.573263	0.924839	786.694	702.385	723.969	669.4	766.653	24.3304	24.6803	24.8691	21.4689	15.0486	13.3056	10.7823	9.483
8_-_20340	NM_009149	Glg1	0.193161	0.55434	0.474484	0.488175	0.39381	2674.11	3136.75	3196.06	3073.5	3164.31	66.9643	64.0665	67.0157	80.452	90.1209	83.5224	91.9179	86.9982
19_-_226075	NM_175459	Glis3	1.79609	0.224732	0.311333	0.536398	2.51354	3926.06	3938.1	3927.12	3941.07	3944.58	13.3929	10.2302	10.733	17.4011	14.442	9.52209	8.64886	12.8581
12_+_73046	NM_028419	Glrx5	0.0292722	0.0131903	0.0452356	0.020077	0.117539	409.378	408.236	408.988	410.818	409.847	50.2232	43.0946	40.3141	49.6045	85.9121	85.6918	165.243	177.803
4_-_79554	NM_024472	Gltpd1	0.0358489	0.040882	0.0269866	0.0251967	0.0685909	1104.75	1177.09	1185.97	1153.77	1124.8	10.0446	11.8926	11.5183	11.9774	11.3259	10.3112	10.4074	8.57508
14_+_14661	NM_008133	Glud1	1.50517	0.519395	0.631608	0.856613	1.16692	966.417	964.761	950.736	983.679	985.894	131.473	146.036	144.241	149.605	110.954	107.974	100.494	98.5948
13_+_100038538	NM_001177750	Gm10767	Inf	NaN	1.14672	Inf	NaN	137.193	129.29	120	137.838	161.209	13.8393	10.9974	9.68586	10.2825	1.41316	2.30243	1.99064	1.3703
4_-_433791	NM_001085522	Gm13251	0.838474	0.993998	0.665437	0.55126	0.618453	1086.3	953.41	1015.91	912.555	1051.19	17.4107	26.4706	28.7958	30.2825	7.15248	10.6719	11.9198	8.51442
8_-_212728	NM_001159907	Gm17296	0.43512	0.326248	0.244419	0.410453	0.661586	2003.05	1859.31	2162.77	2577.5	2141.47	2.90179	4.98721	2.6178	2.14689	5.91348	3.13528	2.03093	1.1681
11_+_14667	NM_010299	Gm2a	0.0418823	0.0546884	0.0705446	0.0553824	0.0937911	1549.62	1554.16	1676.41	1702.78	1623.35	10.0446	15.7289	16.4921	35.3672	8.43298	7.08674	9.05509	13.4966
17_+_100041621	NM_001123372	Gm3435	0	NaN	NaN	0	4.02273	84	84	79.5	79.5	82	1.11607	1.79028	1.04712	3.05085	3.17786	3.12466	4.48038	3.15742
16_+_207806	NM_001029889	Gm608	16.1174	3.36725	2.92081	3.63209	12.3718	4827.76	5163.45	4843.37	4298.21	5310.64	6.47321	6.64962	6.28272	3.16384	6.99623	4.13454	4.36488	4.78159
6_-_23885	NM_011818	Gmcl1	0.802952	0.245159	0.251385	0.552706	0.553121	1079.7	1115.72	1094.77	1081.24	1078.7	32.1429	22.5064	26.7016	27.4576	13.2907	13.0455	13.6725	13.7615
4_-_56809	NM_001122992	Gmeb1	0.211432	0.343719	0.366116	0.392965	0.225528	1198.77	1170.63	2069.85	1354.22	2007.46	22.5446	10.9974	7.06806	13.2203	7.74791	6.14346	5.7109	4.43377
14_-_63985	NM_022023	Gmfb	1.56432	1.32243	1.46942	2.264	1.30628	2842.06	2897.68	2803.39	2820.97	2974.49	110.045	130.946	124.607	124.52	54.1603	61.9611	48.3691	33.9293
8_+_78816	NM_198101	Gmip	0.355159	0.395693	0.364038	0.260027	0.227524	844.92	773.85	837.857	820.2	795.48	4.46429	2.68542	1.3089	2.82486	6.66098	3.39978	5.0384	5.38673
9_+_331026	NM_177910	Gmppb	0.157621	0.0886453	0.250661	0.10342	0.209216	345.206	330.938	345.276	334.903	353.724	21.4286	31.0742	29.5812	31.0734	13.1205	19.2792	20.4864	15.1974
3_+_229363	NM_001033300	Gmps	0.0147716	0.0363429	0.0375094	0.0239484	0.00715971	470.554	672.337	735.35	927.585	790.379	63.6161	38.3632	37.1728	36.3842	26.4489	20.8912	17.0246	11.4284
3_-_14696	NM_013531	Gnb4	0.850542	1.39047	1.01565	0.950356	0.779872	1077.27	1063.78	1123.09	1073.05	1064.41	34.8214	17.2634	19.6335	12.4294	28.9671	14.6136	13.7722	9.69444
4_-_50798	NM_001190414	Gne	0.0441428	0.208961	0.327772	0.17753	0.169152	586.015	661.093	811.324	696.732	664.852	16.7411	21.7391	14.6597	24.4068	20.9187	17.2808	12.565	21.7173
6_+_66066	NM_025331	Gng11	3.73396	2.26101	1.93101	2.53154	2.5853	256.813	258.741	256.514	263.618	260.59	188.393	141.944	163.089	115.593	30.9376	35.7112	57.298	59.6221
6_+_14701	NM_001177560	Gng12	0.37744	0.56711	0.581959	0.524602	0.739065	2512.37	2585.03	2568.59	2541.78	2675.14	165.179	188.107	175.654	174.802	192.445	197.622	186.345	184.18
14_-_14702	NM_010315	Gng2	0.0413047	0.314538	0.33937	0.244888	0.368295	1396.52	1063	1099.14	850.667	1327.36	19.6429	18.0307	25.1309	20.226	9.30995	13.5798	15.9167	20.9241
17_+_14670	NM_008136	Gnl1	0.01387	0.0271647	0.0366634	0.025644	0.0180227	163.707	155.17	139.286	146.474	154.1	94.4196	118.67	102.618	112.655	22.9483	24.352	32.4927	39.7576
8_+_14712	NM_010322	Gnpat	10.2997	4.02273	4.45795	5.11586	4.99984	576.272	551.221	572.57	585.106	566.839	25.2232	24.6803	24.6073	25.3107	21.5211	18.9615	13.3508	13.0549
5_-_67980	NM_001038015	Gnpda2	0.148284	0.291176	0.12748	0.094902	1.81354	811	824.133	813.542	849.968	818.226	13.3929	12.2762	16.2304	14.0113	12.2324	13.8046	15.5368	16.3594
14_-_54342	NM_019425	Gnpnat1	0.691926	0.35795	0.436123	0.380369	0.699615	952.414	976.169	896.073	977.475	965.177	34.375	36.9565	41.8848	34.4633	22.8271	27.0564	28.8203	22.357
10_+_432486	NM_001004164	Gnptab	1.97798	0.832832	0.746205	0.620997	0.791694	1270.3	1234.88	1224.05	1237.8	1253.15	25.8929	20.4604	14.1361	23.5028	16.282	10.2993	7.0194	8.02446
17_-_214505	NM_172529	Gnptg	0.461074	0.0566737	0.161205	0.155448	0.634746	264.714	269.278	264.398	271.393	266.346	16.0714	21.2276	15.9686	17.2881	6.25147	10.8373	11.6249	12.6153
5_+_269682	NM_008146	Golga3	0.0879602	0.364011	0.424034	0.586678	0.138634	326.152	321.313	587.936	405.4	623.472	14.9554	23.913	23.5602	21.8079	22.1989	22.5045	15.4313	19.9393
12_+_27277	NM_013747	Golga5	0.144697	0.101812	0.0516775	0.250328	0.417638	396.877	416.023	418.725	419.524	403.532	19.1964	23.2737	21.9895	25.0847	11.0872	15.8305	17.2779	16.1682
3_-_73124	NM_001291069	Golim4	0.249572	0.0744317	0.0716096	0.093351	0.264508	1603.08	1605.84	1597.56	1609.61	1603.4	110.938	65.0895	82.199	66.2147	137.074	96.0854	105.61	65.0175
15_+_66629	NM_025673	Golph3	0.300955	0.0530157	0.0501822	0.0985258	0.335925	1562.3	1541.23	1552.42	1543.44	1549.07	124.777	135.422	136.911	145.763	98.8353	106.358	82.4851	68.7041
6_+_66964	NM_025872	Golt1b	4.63675	1.89611	1.72614	2.41968	2.16818	2188.83	2161.15	2157.01	2211.82	2170.93	46.6518	56.9054	54.712	43.2768	41.3388	42.8349	42.9113	40.734
10_-_94221	NM_001199272	Gopc	0.981177	0.816571	0.674382	0.834182	1.28047	1958.97	2131.46	2085.29	2229.41	2019.64	37.7232	29.2839	37.6963	28.8136	16.9602	13.97	13.1154	9.99876
9_-_74498	NM_028976	Gorasp1	0.0954398	0.222871	0.20245	0.237271	0.158243	1515.88	1362.94	1481.9	1699.93	1644.77	7.8125	7.67263	7.06806	9.26554	4.26049	4.27045	3.76714	5.32191
11_-_53334	NM_016810	Gosr1	0.351625	0.568986	0.562399	0.879088	6.3553	1963.66	2642.91	2545.51	2776.22	2731.11	20.3125	13.555	20.1571	15.0282	20.8011	19.306	14.9545	12.754
11_-_56494	NM_019650	Gosr2	0.559976	0.378408	0.379113	0.538303	0.465894	2258.84	2174.76	2100.56	2199.67	2216.67	65.4018	83.8875	91.0995	111.412	42.886	46.3273	41.0717	52.6102
1_+_67769	NM_026367	Gpatch2	3.45757	0.802472	0.818445	1.56414	2.64701	2645.32	2821.83	2749.67	3118	2906.07	5.35714	5.49872	3.9267	6.89266	5.24051	4.46557	2.65353	3.35138
3_+_66614	NM_001286857	Gpatch4	0.057971	0	0	0	0.210526	265.88	264.445	264.258	263.744	268.254	30.5804	20.844	11.2565	13.7853	17.6949	14.1459	15.8086	14.9226
11_-_237943	NM_001159492	Gpatch8	0.586341	0.372042	0.456791	0.435261	0.362685	1449.49	1447.44	1379.55	1257.69	1436.13	18.0804	11.6368	20.4188	14.1243	7.84342	6.0249	6.50808	4.67821
13_-_73274	NM_028487	Gpbp1	0.36478	1.03526	0.820317	0.690172	0.541063	386.917	401.809	403.734	391.693	420.219	99.5536	105.882	86.1257	78.5311	31.258	30.9366	22.9243	20.7319
4_+_77110	NM_029868	Gpbp1l1	0.503229	0.219745	0.128245	0.258304	0.76588	805	818.043	813.655	812.577	808.142	36.1607	30.4348	47.644	40.565	12.5991	12.4808	13.4281	16.0432
X_-_14735	NM_008150	Gpc4	1.12059	1.03255	0.970938	0.751531	0.426805	1261.8	1369.29	1241.37	1211.29	1196.43	153.571	326.343	364.136	396.949	92.0483	184.32	155.112	204.739
14_+_23888	NM_001079844	Gpc6	1.19551	0.980949	1.23736	2.73678	1.81337	4032.37	3727.35	3980.09	3938.08	4099.23	33.4821	30.8184	23.5602	47.5706	31.135	18.9655	13.5693	18.8639
9_-_333433	NM_175380	Gpd1l	0.396202	0.0650753	0.0516695	0.0265771	1.68161	2777.93	2827.65	2786.64	2903.36	2813.43	8.25893	5.6266	2.87958	6.89266	10.3482	10.2621	8.19668	6.35496
2_+_14571	NM_001145820	Gpd2	0.199496	0.438712	0.590317	0.583267	1.34495	3050.13	2832.84	3085.79	3060.15	3061.31	14.9554	14.9616	17.5393	13.3333	21.8085	13.1398	12.6308	8.23475
X_+_209416	NM_173747	Gpkow	1.8053	0.971865	1.87666	2.20168	1.96228	1892.72	1749.5	1728.67	1868.52	1803.75	19.6429	12.6598	18.0628	11.6384	16.2846	13.8312	8.72705	8.7188
5_+_74254	NM_133756	Gpn1	0	0.0482655	0.0323887	0.0745921	0	518.659	523.196	531.742	509.972	519.236	12.5	11.8926	9.42408	14.3503	7.54191	5.0512	4.75452	5.6574
2_+_277463	NM_178760	Gpr107	0.471251	0.485597	0.414421	0.448341	0.360335	2117.75	1864.16	2106.8	2226.13	2156.87	18.5268	26.5985	31.1518	35.9322	25.9704	25.666	16.9023	22.7957
8_+_78560	NM_054044	Gpr124	0	0.052761	0.0594286	0.0294553	0.186999	1382.8	1383.84	1382.47	1386.02	1381.6	33.4821	32.0972	24.8691	37.2881	36.9393	30.9495	44.4995	33.7357
13_-_83924	NM_031999	Gpr137b	0.23613	0.281107	0.24396	0.117011	0.122884	877.649	303.462	500.708	649.846	875.958	2.90179	3.06905	3.40314	2.71186	21.7425	21.9668	15.6081	16.3886
3_-_229357	NM_177346	Gpr149	2.71015	2.26161	2.84314	1.85096	1.14842	923.01	1007.73	1009.84	988	992	28.7946	4.85934	5.2356	3.61582	19.9418	3.26717	3.02862	1.8198
2_-_381413	NM_201367	Gpr176	0.0427811	0.0248314	0.0514815	0.0531618	0.442764	2118.13	2114.11	2104.68	2108.79	2115.3	75.8929	76.087	61.5183	58.8701	82.4656	69.6018	77.9783	45.132
X_+_237175	NM_001079857	Gpr64	0.625564	0.684211	0	0.210526	1.36133	1563.46	1579	1560.45	1572.52	1561.08	1.78571	2.8133	5.49738	18.8701	1.80157	2.01099	2.6434	5.60197
3_-_67549	NM_026229	Gpr89	0.239311	0.784767	0.471025	0.462668	0.34947	715.95	919.111	744.08	384.742	549.727	8.03571	9.59079	8.11518	8.70056	8.16686	5.98287	5.62092	4.00683
3_-_76123	NM_029522	Gpsm2	0.307237	0.544248	0.384175	0.665192	0.658826	538.526	546.957	576.503	567.473	558.975	15.4018	18.2864	23.822	41.0169	8.71782	8.96073	9.66216	16.7194
8_+_108682	NM_173866	Gpt2	3.43137	0.506912	0.368509	0.520446	1.96035	1864.33	1856.45	1846.24	1848.95	1837.24	12.9464	22.2506	21.2042	19.209	5.84255	15.5898	8.6302	10.1902
9_-_235283	NM_172768	Gramd1b	0.148829	Inf	1.02151	0.933561	0.541195	4376.92	854.333	3114.4	3415	4194.33	1.33929	2.55754	3.66492	4.74576	1.87724	3.233	1.96952	2.17518
18_+_107022	NM_026240	Gramd3	1.81053	1.76938	2.74812	1.81053	4.52632	871.545	935.36	897.854	903.406	1010.69	11.1607	11.3811	8.37696	12.7684	5.01871	5.47574	5.41015	7.63341
11_-_14784	NM_008163	Grb2	0.576413	0.978908	0.960415	0.953456	0.666115	814.589	876.956	777.987	887.743	800.577	66.2946	76.2148	94.7644	99.435	16.8319	22.0532	21.5614	21.5001
1_-_23893	NM_011825	Grem2	5.836	0.377141	0.65154	2.40193	4.09527	2935.17	2927.43	2930.21	2916.24	2938.8	414.286	131.969	121.466	74.0113	146.212	36.6539	20.7533	14.6037
X_+_54645	NM_001290455	Gripap1	0.304865	0.0891418	0.196589	0.171513	0.239674	348.547	413	422.333	316.273	401.8	2.67857	4.60358	2.87958	5.08475	9.37095	10.1314	12.9302	11.5766
19_+_14773	NM_018869	Grk5	0.0582421	0.185927	0.153367	0.0811942	0.0788062	1190.92	1208.28	1151.86	1232.47	1415.54	18.9732	16.8798	16.7539	18.7571	6.85396	6.25161	6.45269	6.99192
18_-_17714	NM_021296	Grpel2	0.534685	0.377742	0.448477	0.435504	0.336959	1384.22	1206.98	1163.35	947.494	1535.92	31.4732	22.89	20.6806	18.8701	9.23197	7.71656	7.09757	6.48892
16_+_56637	NM_019827	Gsk3b	0.213342	0.0734064	0.117515	0.26392	0.384	5030.78	4963.48	4979.3	4971.21	5016.49	49.3304	63.9386	67.2775	65.0847	37.817	48.0026	32.6408	23.7243
16_-_14852	NM_146066	Gspt1	0.0165468	0.0182496	0.0266725	0.0183733	0.0167455	714.336	678.551	727.724	727.823	651.271	141.741	107.545	109.162	89.6045	221.039	140.141	100.474	77.474
3_-_67553	NM_026231	Gstcd	1.10695	0.208518	0.250909	0.44278	0.88556	1205.51	1176.42	1248.24	1245.55	1232.15	19.8661	9.59079	8.63874	7.00565	11.3981	4.60398	3.95472	3.63543
19_+_14873	NM_010362	Gsto1	0.16144	0.0972485	0.0928793	0.091457	0.131242	324.66	318.818	319.854	318.153	321.112	314.509	532.609	434.031	361.356	435.7	724.204	896.839	650.429
12_+_14874	NM_010363	Gstz1	0.748844	0.296372	0.265583	0.450503	1.42225	692.231	739.567	718.686	607.5	739.958	6.69643	10.9974	9.42408	16.0452	13.4896	14.1484	15.7433	20.1912
12_-_83602	NM_175335	Gtf2a1	0.309566	0.677248	0.504858	1.28192	1.63132	3738.84	4135.86	3987.94	4168.24	4438.67	18.9732	15.2174	17.5393	11.1864	16.3828	15.8894	18.3248	9.06351
8_+_68153	NM_001167922	Gtf2e2	0.31503	0.253978	0.392038	0.325308	0.492518	496.2	464.742	487.877	485.677	495.5	44.1964	32.3529	40.5759	36.1582	14.9864	12.1155	15.2235	20.0627
14_-_68705	NM_026816	Gtf2f2	0.204713	0.356369	0.281936	0.191205	0.214894	426.681	359.456	393.066	394.04	409.299	63.1696	63.555	52.6178	46.4407	10.5215	10.9328	12.9791	13.0126
13_-_23894	NM_022011	Gtf2h2	0	0	0	0.256818	0.171212	131.229	136.121	132.721	134.956	151.734	20.3125	17.3913	23.822	12.3164	10.4419	12.9049	10.2036	10.7338
17_+_66467	NM_181392	Gtf2h5	0.362097	0.592842	0.57068	0.595337	0.575274	310.046	333.469	317.119	331.69	309.929	65.625	83.6317	72.5131	76.2712	20.6672	16.8317	23.5677	61.6446
5_-_71752	NM_027901	Gtf3c2	0.302616	0.0782548	0.0786377	0.208161	0.306687	1258.59	1200.38	1183.29	1194.83	1170.66	32.5893	27.6215	27.4869	24.9718	40.3728	47.6985	40.9965	33.9065
1_-_98488	NM_001033194	Gtf3c3	0.735219	0.548679	0.601296	0.961441	1.73988	1300.26	1483.43	1309.92	1345.99	1370.59	40.4018	33.5038	34.2932	34.5763	14.4169	11.302	9.86846	9.11726
2_-_269252	NM_001166033	Gtf3c4	1.76952	3.26064	3.77559	7.16554	5.46844	3401.86	3474.54	3639.37	3877.46	3761.36	20.9821	21.6113	21.466	17.9661	11.1868	9.2989	5.3345	4.86611
10_-_67371	NM_026113	Gtf3c6	0.150323	0.384042	0.378564	0.41765	0.0446653	450.508	436.291	508.867	323.14	390.561	45.3125	46.2916	45.0262	55.5932	33.3017	32.0019	33.9478	33.0921
5_-_207704	NM_153116	Gtpbp10	4.86721	0.972679	1.11044	1.03604	1.60688	603.224	818.833	795.151	692.237	766.104	16.0714	9.33504	9.94764	7.57062	6.60371	5.52562	7.48619	5.26671
8_+_70359	NM_032544	Gtpbp3	0.0541395	0.0851945	0.0966571	0.0611444	0.0724613	905.543	839.824	999.15	698.2	976	3.79464	5.11509	3.9267	6.10169	5.12665	5.77634	5.25467	6.27995
13_-_69237	NM_027000	Gtpbp4	0.317372	0.200562	0.187448	0.282996	0.380584	516.492	542.075	531.332	586.553	531.187	59.1518	48.2097	49.7382	39.209	27.3193	25.7595	20.8251	16.9231
16_-_66067	NM_025332	Gtpbp8	0.324053	1.51225	2.3425	1.11689	0.339436	812.904	637.69	535.708	757.091	867.737	18.75	17.5192	20.1571	21.4689	9.48928	9.23462	7.71265	8.19477
9_+_234889	NM_001033322	Gucy1a2	1.44389	1.28017	2.04474	2.51063	3.30264	4592.4	4102.69	4312	3992.5	6487.37	7.8125	3.32481	1.57068	2.14689	26.0927	4.51448	4.15176	3.53644
5_+_231279	NM_172711	Guf1	0.0795316	0.18065	Inf	0.286314	0.0221552	388.277	618.66	632.14	707.524	402.667	11.1607	10.9974	10.9948	13.8983	4.8292	4.37151	4.99384	3.45948
6_+_232313	NM_198612	Gxylt2	6.24752	6.9976	7.2587	15.8752	8.56423	417.634	355.556	471.384	387.667	407.15	4.01786	12.6598	10.2094	12.0904	6.71573	22.9731	14.7319	19.3305
X_-_14933	NM_008194	Gyk	2.71044	0.737536	0.76335	5.53152	6.85909	1231.33	1367.57	1246.41	1668.16	1349.43	12.5	7.54476	6.5445	6.89266	4.84006	3.40428	4.79768	1.84845
6_+_232440	NM_177688	H2afj	0.0194168	0.0393605	0.0341196	0.0552433	0.0196888	144.597	131.306	169.31	170.942	139.138	59.1518	63.4271	71.7277	86.2147	30.3059	27.4658	49.6048	75.2947
3_+_51788	NM_016750	H2afz	0.864865	1.66667	0.785714	1.11111	1.78947	465.913	468.047	466.733	467.457	467.294	157.366	140.537	128.272	74.9153	132.745	114.781	98.8863	50.032
1_-_15078	NM_008210	H3f3a	4.26596	1.05914	1.79141	2.15221	4.62595	478.722	484.048	476.326	479.625	480.441	801.562	752.941	802.618	824.633	327.688	363.63	359.644	293.975
11_-_15081	NM_008211	H3f3b	2.53289	1.87813	3.28858	3.18163	2.77843	636.827	710.292	700.491	710.269	679.43	558.482	526.471	500	465.65	247.235	243.875	230.52	216.25
4_-_100198	NM_001291004	H6pd	0.191728	0.040631	0.051961	0.0663525	0.146855	2233.43	2373.03	2363.29	2222.94	2271.83	26.7857	33.6317	37.9581	35.2542	21.4885	19.9907	13.7286	14.7874
13_+_56541	NM_019986	Habp4	0.724487	0.515837	0.44347	0.619799	0.510407	1110.65	1061.64	1048.43	1128.65	1101.74	18.75	16.1125	22.2513	26.2147	12.7792	11.4784	11.6478	13.7462
10_+_209462	NM_172473	Hace1	0.251927	1.49057	0	0	1.93774	662.093	666.94	644.66	669.857	648.769	14.9554	6.77749	9.1623	8.81356	4.50665	3.69528	4.74554	4.44213
8_+_15111	NM_010402	Hand2	0.0220625	0.0403775	0.0279897	0.0484994	0.0348715	418.259	511.535	469.778	444.727	447.556	9.59821	5.75448	8.63874	10.1695	3.75244	2.21627	3.7682	5.387
2_+_241547	NM_178724	Harbi1	1.69934	1.69377	1.05861	1.58791	10.0568	759.247	749.438	728.5	728.68	745.885	7.14286	6.13811	6.5445	9.83051	2.70545	2.14095	1.36714	2.87769
18_+_70791	NM_080636	Hars2	0.324747	0.270622	0.196816	0.351078	0.420968	950.77	891.1	893.76	888.641	885.65	15.625	16.4962	16.7539	15.8192	8.65843	6.48193	5.44363	5.1512
15_-_15117	NM_008216	Has2	0.0839175	0.116877	0.087187	0.20555	0.231816	2121.05	2131.16	2170.38	2159.79	2140.88	54.0179	17.3913	37.1728	15.1412	34.1261	11.0447	15.1576	4.72686
2_+_66296	NM_025475	Haus2	Inf	Inf	Inf	Inf	1.96665	2044.88	1967.68	1905.74	1956.92	2004.14	18.3036	11.8926	13.6126	14.9153	12.6764	12.3888	9.79623	8.51551
8_-_76478	NM_029621	Haus8	0.209677	0.0863378	0.129507	0.159393	0.38852	425.444	389.686	445	341	450.5	7.8125	6.13811	5.75916	7.23164	12.8828	7.84211	11.5014	5.35041
X_-_15159	NM_008222	Hccs	0.136249	0	0	0	0.0615861	1294.24	1294.53	1298.5	1297.55	1294.19	22.7679	17.3913	14.3979	12.7684	18.9659	22.3454	23.5779	14.761
10_+_67933	NM_001081218	Hcfc2	0.168195	0.237452	0.415541	0.277027	0.440982	508.417	367.969	569.708	436.609	835.829	7.14286	8.31202	6.02094	13.2203	17.6616	14.2981	12.8898	9.4246
10_+_15182	NM_008229	Hdac2	0.107019	0.111033	0.173248	0.127183	0.785755	321.904	321.974	320.81	321.92	322.605	175	122.634	130.105	108.136	75.3688	68.9419	81.7355	96.5652
1_-_208727	NM_207225	Hdac4	0.54507	0.643784	0.658206	1.10803	1.20217	3496.16	2522.67	3668.37	3415.51	3806.23	7.36607	7.67263	10.733	8.92655	7.02993	6.42155	6.50174	7.23308
7_-_29877	NM_013886	Hdgfrp3	0.331467	0.234062	0.212089	0.192177	0.348161	2928.68	2404.4	2286	2125.66	2641.47	13.8393	12.1483	12.3037	13.5593	5.47451	4.65824	3.3184	3.26683
1_-_110611	NM_133808	Hdlbp	0.0885375	0.215016	0.216355	0.184182	0.215692	650.538	949.052	795.219	801.997	820.119	299.107	379.923	417.277	481.695	261.408	241.221	166.562	140.649
17_-_320473	NM_001081179	Heatr5b	0.0345419	0.353378	0.173037	0.176689	0.0577386	460.654	448.667	379.093	460.654	373.576	10.7143	13.6829	21.2042	14.1243	14.0704	13.4743	10.7468	11.8688
11_+_217026	NM_145432	Heatr6	1.17635	0.314226	0.369424	0.69931	0.551379	584.172	624.847	663.208	663.148	673.027	13.1696	6.77749	7.06806	8.47458	8.66164	6.71998	4.10831	3.88479
10_-_56016	NM_019487	Hebp2	0.05875	0.0699405	0.145147	0.0661424	0.19907	440.885	472	442.107	443.239	432.575	14.5089	20.3325	24.0838	29.4915	5.04674	8.89321	14.8397	13.0338
10_-_380629	NM_001033432	Heca	1.40803	0.526708	0.487153	0.847	1.74452	2855.06	2853.28	2899.35	2825.91	2983.08	33.2589	25.7033	28.2723	32.9944	6.3537	4.70748	3.1123	2.71017
4_+_76608	NM_175244	Hectd3	0.132917	0.167015	0.146789	0.131034	0.0994689	963.116	1032.4	1036.46	1002.14	967.871	5.58036	6.90537	7.59162	9.60452	3.97225	5.09742	6.29736	4.49982
19_+_15201	NM_008234	Hells	0.0687343	0.3425	0.445093	0.20293	0.209988	1368.27	1025.24	1397.18	1256.78	1535.36	33.0357	11.1253	9.68586	8.24859	33.8122	11.4467	6.71221	2.14132
9_-_69536	NM_133984	Hemk1	0.162594	0.426809	1.04331	0.569079	0.0758772	379.966	327	516.394	431.167	377.403	3.34821	4.21995	6.28272	7.00565	1.95089	2.57297	1.41793	5.416
7_+_15204	NM_010418	Herc2	1.13974	0.34447	0.373091	0.523504	1.20551	516.025	556.503	540.179	569.911	538.494	42.1875	43.4783	47.1204	38.4181	16.7753	10.6239	5.1262	3.58474
6_+_73998	NM_028705	Herc3	0.555317	0.849202	0.541434	0.803226	0.917972	1262.09	1449.8	1299	1404.54	1384.62	13.3929	6.13811	15.9686	7.11864	8.50864	4.5782	7.71075	4.99327
13_-_15212	NM_010422	Hexb	0.237817	0.291866	0.160526	0.0594542	0.0944272	118.851	122.275	124.986	120	118.4	24.3304	44.1176	41.8848	59.322	16.0043	25.3187	30.4296	43.083
11_+_192231	NM_138753	Hexim1	0.058971	0.199166	0.240415	0.147565	0.119197	523.863	661.69	613.503	700.831	603.304	38.8393	47.8261	46.5969	48.3616	7.88705	10.269	9.75911	9.04845
13_-_15216	NM_010424	Hfe	0.174939	0.133777	0.145639	0.22336	0.175759	1093.08	897.4	1593.92	793.571	1096.4	1.11607	1.53453	1.83246	4.74576	1.22528	2.06027	2.61206	5.80375
8_-_52120	NM_029884	Hgsnat	0.206796	0.302355	0.281488	0.250071	0.184869	764.413	881.466	705.757	745.049	707.799	25.8929	27.3657	31.9372	36.4972	24.7612	24.5162	24.3211	24.9722
3_-_15247	NM_008246	Hiat1	0.506051	0.116269	0.169145	0.351263	0.373569	896.442	936.036	962.92	984.576	941.659	31.25	28.9003	36.3874	29.1525	38.5662	39.0299	31.4691	20.2887
13_-_66631	NM_133680	Hiatl1	0.378984	0.164285	0.217003	0.9495	0.834788	1476.13	1480.08	1475.08	1477.17	1477.03	75.2232	66.1125	65.7068	65.3107	17.8733	16.7452	23.0283	30.2935
11_-_15248	NM_001098203	Hic1	0.014351	0.0332105	0.0387822	0.0302642	0.0402429	1258.86	1239.64	1508.37	1224.65	1603.25	14.9554	19.3095	14.1361	16.3842	14.3711	21.6444	21.4925	19.63
12_+_15251	NM_010431	Hif1a	0.277315	0.195068	0.211599	0.254185	0.346082	1230.34	1281.73	1260.02	1258.71	1256.73	133.705	248.082	425.131	453.107	92.8919	146.974	154.298	112.712
19_+_319594	NM_176958	Hif1an	2.19422	0.555383	0.801292	1.5067	1.79775	4735.56	4840.74	4701.91	5115	4974.41	13.6161	10.3581	11.5183	13.4463	7.93926	6.9746	4.47211	4.13987
9_-_56295	NM_019814	Higd1a	0.0494017	0.0508132	0.0590571	0.0529089	0.019628	161.123	127.429	134.889	162.932	204.058	127.902	175.575	237.435	219.887	9.67616	11.1257	20.3961	45.8758
9_-_102423	NM_172162	Hinfp	2.33194	0.915843	0.778711	1.07746	0.608449	2696.34	2429.82	2705.62	2986.76	2786.5	8.70536	5.11509	5.49738	6.77966	4.24611	4.03412	2.21619	1.61207
5_-_215114	NM_146001	Hip1	3.16482	0.677883	0.955637	2.54662	3.5745	4035.44	3994.58	4267.47	4400.22	4472.31	17.4107	7.92839	9.68586	11.0734	13.5339	8.73151	5.5854	7.31195
3_-_15257	NM_010432	Hipk1	1.27016	0.0490736	0.0736105	0.590144	1.40744	3949.05	3950.77	3937.95	3964.7	3977.24	54.4643	55.7545	63.3508	65.1977	29.4601	21.4683	16.3055	13.5533
7_+_233876	NM_172746	Hirip3	2.10547	0.65625	0.150391	0.300781	0	238.73	254.882	263.1	256.75	245.595	15.1786	7.67263	6.28272	4.18079	11.6694	7.17864	6.69233	4.06035
13_+_14957	NM_145713	Hist1h1d	0.170864	1.43201	0.805504	0.522489	1.04498	1782.55	1781.89	1807.8	1773.48	1763	2.00893	3.19693	5.49738	5.9887	1.55154	1.70572	2.07809	1.80172
13_+_319150	NM_178203	Hist1h3b	1.94543	2.57883	1.73514	1.03358	2.12037	1147.78	1289.5	1105.5	985.368	1267.63	1.33929	9.97442	9.94764	6.10169	2.05382	7.1605	8.90274	4.56299
11_+_319162	NM_178218	Hist3h2a	0.20053	0.0579118	0.114137	0.109164	0.172653	584.523	555.072	590.194	532.258	615.078	18.5268	24.4246	25.3927	26.2147	10.7259	11.1241	10.8978	11.3883
13_+_110521	NM_007772	Hivep1	0.381065	0.508087	0.220171	0.550427	2.86222	480.792	492.848	480.037	485.361	492.966	17.6339	20.844	18.8482	16.8362	6.3086	5.01964	5.43978	5.50251
10_+_15273	NM_010437	Hivep2	2.4166	0.207933	0.371452	0.853185	1.27394	1602.96	1576.67	1586.88	1523.12	1579.46	14.2857	27.4936	32.199	33.3333	5.025	7.39659	3.66326	2.90148
16_-_110948	NM_139145	Hlcs	0.715641	0.176562	0	1.01925	0.830497	2549.05	2549.67	2591.6	2599	2558.64	2.00893	1.91816	2.6178	3.72881	2.09909	2.08357	1.81056	2.59452
5_-_15289	NM_010439	Hmgb1	0.235664	0.163907	0.140141	0.481061	0.189785	334.843	354.331	314.255	271.84	258.368	281.25	248.082	357.592	242.712	80.1804	56.9507	65.1614	69.0044
13_-_15357	NM_008255	Hmgcr	0.811419	0.168573	0.194284	0.267762	1.05329	1514.5	1473.94	1469.78	1423.55	1470.6	75.2232	131.458	136.649	67.3446	57.8508	93.3068	64.847	27.6955
8_+_70823	NM_178017	Hmgxb4	5.32351	0.545437	1.20208	2.0651	2.38221	1683	1749.4	1441.78	1658.59	1661.4	9.59821	5.75448	9.68586	8.70056	10.6547	5.1377	5.29166	7.22358
16_+_15369	NM_010443	Hmox2	0.0197129	0.0277858	0.0267746	0.0205458	0.018334	187.267	190.006	195.182	165.237	179.36	35.0446	42.1995	46.3351	48.9266	14.273	19.4679	29.3165	21.0671
11_-_15374	NM_008258	Hn1	2.40278	5.41695	4.67801	2.93886	2.2157	593.399	502.787	552.314	574.899	567.656	98.4375	100.895	90.5759	66.6667	137.24	133.214	135.641	110.765
17_-_52009	NM_198937	Hn1l	2.58656	0.570582	0.628622	0.993387	1.46371	2163.35	2094.85	2102.65	2102.37	2102.81	48.2143	38.7468	33.2461	27.6836	42.1825	34.1869	26.4024	17.5694
13_-_77134	NM_029872	Hnrnpa0	2.24241	0.742692	1.22212	1.92848	2.127	1039.79	1265.84	1225.1	1303.42	1180.22	152.232	150	159.162	170.847	89.775	90.6408	114.427	83.6287
11_-_15384	NM_001048061	Hnrnpab	0.0613636	0.0368165	0.0394634	0.0415348	0.0680903	543.667	527.708	518.858	520.06	547.093	528.348	398.977	351.309	281.582	283.896	244.745	270.776	174.51
14_-_15381	NM_016884	Hnrnpc	0.0507881	0.0394508	0.0320607	0.0356454	0.0382432	600.214	466.994	481.444	459.418	507.414	177.232	179.284	187.173	148.362	94.9977	114.985	145.975	206.976
6_+_98758	NM_001166432	Hnrnpf	0.968019	0.213418	0.293804	0.333547	0.333336	574.745	590.203	579.72	584.765	597.443	399.33	307.928	354.974	255.254	70.7566	63.8855	64.1979	49.4928
1_-_51810	NM_016805	Hnrnpu	1.31087	0.773391	1.02095	0.475405	0.669759	624.19	587.952	592.839	614.159	635.045	544.196	446.675	403.927	354.35	234.721	175.608	133.184	100.882
19_+_68693	NM_001081196	Hnrnpul2	0.359043	0.608486	0.453337	0.570884	0.492868	1127.41	1310.36	1180.86	1136.71	1313.86	67.8571	74.4246	72.7749	76.7232	45.5413	47.4862	54.5634	94.488
14_-_239099	NM_001177705	Homez	0.212668	0.204489	0.272652	0.695262	0.647548	1819.69	1556.45	1965.58	1401.77	2212.33	2.45536	3.32481	8.11518	7.11864	1.318	1.43436	1.69111	1.37478
8_-_320191	NM_207659	Hook3	0.144917	0.561117	0.374312	0.2458	0.23426	6932.38	6888.73	6396.74	7071.03	7781.47	48.2143	46.8031	49.2147	53.2203	17.9844	19.1572	21.7199	22.4525
6_-_15395	NM_008263	Hoxa10	0.806072	0.202404	0.40881	0.282172	2.65903	1303.67	1302.33	1302.58	1302.28	1302.45	85.7143	56.6496	68.3246	63.9548	18.3308	23.7349	27.7034	32.4969
6_-_15398	NM_008264	Hoxa13	0.731513	0.142515	0.155641	0.118967	0.264822	1483.32	1488.44	1459.86	1316.11	1516.03	8.03571	5.49872	9.94764	13.5593	5.76549	4.02441	6.68577	7.0917
6_-_15405	NM_010456	Hoxa9	1.25191	0.123939	0.26246	0.257233	2.38158	1081.69	1080.22	1066.72	1062.02	1074.44	15.1786	12.7877	15.7068	12.2034	4.95613	3.12857	5.86928	2.94997
11_+_15412	NM_010459	Hoxb4	0.0276915	0.169841	0.0299217	0	0	1208.6	1258.8	1210.78	1208.6	1208.6	1.11607	2.94118	1.3089	1.12994	2.81893	2.27742	2.59578	3.82817
11_+_15417	NM_008270	Hoxb9	0.661752	0.141876	0.155019	0.24527	0.290927	1959.23	1685.96	1617	1964.06	2666.74	6.02679	5.24297	4.71204	3.05085	24.1702	23.2165	18.7174	14.9297
15_+_15426	NM_010466	Hoxc8	0.193995	0.301769	0.0810013	0.272877	0.269574	1402.93	1403.15	1411.59	1408.81	1410.42	16.0714	5.6266	8.37696	6.44068	6.35829	2.67781	3.24046	5.58909
2_+_15433	NM_008275	Hoxd13	1.52308	0.344043	0.50141	0.447414	0.814791	1347.54	1373.01	1336.14	1336.45	1350.58	25.8929	17.0077	26.178	34.8023	18.0007	12.273	20.9638	23.3792
2_+_15437	NM_008276	Hoxd8	1.95398	1.57822	1.04162	0.765274	0.967221	964.237	975.694	879.519	921.476	966.644	10.9375	6.90537	5.49738	6.66667	7.72184	4.8753	7.22001	7.64727
7_-_246694	NM_001167864	Hps5	5.09725	1.52417	2.5367	2.60526	5.69298	803.435	826.51	825.741	822.532	839.462	10.9375	10.3581	12.3037	17.8531	12.9403	11.5788	9.98669	10.9688
3_-_23908	NM_011828	Hs2st1	0.294234	0.299287	0.306856	0.337404	0.37355	2090.8	2098	2013.05	2156.42	2140.55	89.0625	72.5064	73.5602	60.339	46.1861	34.2232	27.6724	18.0667
18_+_15488	NM_008292	Hsd17b4	0.0579297	0.0371895	0	0.0647816	0.893773	280.044	271.028	274.094	269.092	275.701	40.4018	40.665	48.4293	52.0904	23.2338	24.843	30.5624	27.1994
4_+_72479	NM_024255	Hsdl2	0.150338	0.149632	0.196965	0.134137	0.303538	627.086	513.917	621.233	618.419	671.03	13.3929	27.4936	24.3455	19.096	9.07259	14.5206	15.1519	14.5141
15_+_15499	NM_008296	Hsf1	1.21872	0.247631	0.662281	0.612825	1.33071	344.384	345.688	346.176	345.56	342.173	21.4286	18.9258	19.6335	17.6271	14.6813	10.8484	11.8396	12.1344
10_+_15500	NM_008297	Hsf2	0.0417831	0.321548	0	0	0.126421	718.376	707.474	705.942	724.687	721.278	25.4464	19.9488	21.7277	17.0621	11.637	9.19977	7.64649	8.21256
19_-_73442	NM_175199	Hspa12a	4.40558	0.994527	1.01025	1.95987	2.33598	3542.83	3411.85	3482.67	3475.2	3582.67	4.46429	10.6138	12.8272	16.3842	2.02768	4.19231	2.81753	2.71556
2_+_72630	NM_028306	Hspa12b	4.00859	1.85382	2.32158	5.97226	2.05638	971.94	897.8	984.711	1066.3	968.13	2.23214	4.85934	2.6178	5.19774	2.75421	3.92963	3.58245	3.98576
11_-_15525	NM_008300	Hspa4	0.159494	0.396249	0.300673	0.289877	0.0548654	350.318	250.213	265.479	252.494	371.094	440.179	437.724	394.241	355.819	113.726	118.401	122.324	78.6051
3_+_18415	NM_011020	Hspa4l	0.188017	0.34595	0.237958	0.272624	0.120868	618.373	498.091	531.713	613.111	583.26	17.1875	14.7059	9.42408	10.8475	10.4735	9.02214	6.84779	3.11373
2_+_14828	NM_001163434	Hspa5	0.153132	0.106377	0.134055	0.173604	1.16817	344.881	347.001	347.595	346.088	347.273	746.429	887.98	821.204	758.531	397.851	425.278	426.55	429.419
18_-_15526	NM_010481	Hspa9	0.468321	0.205984	0.25024	0.244669	0.319737	610.028	552.896	573.498	561.232	600.079	440.625	635.678	584.817	519.435	224.031	287.149	236.381	180.163
16_+_66667	NM_175111	Hspbap1	0.83174	Inf	Inf	3.84321	0.447419	374.981	159.889	464.087	236.238	310.798	16.0714	13.2992	10.9948	11.1864	5.98536	4.24278	3.57838	2.57901
1_-_15510	NM_010477	Hspd1	0.693333	0.690399	0.520124	0.467532	1.00111	396.282	387.848	387.071	393.8	391.364	386.384	305.499	280.105	196.158	225.914	175.187	160.882	95.8246
1_+_15528	NM_008303	Hspe1	0.219991	0.187754	0.172505	0.228305	0.565215	148.448	149.504	150.781	149.294	152.089	1344.2	1373.53	1144.5	949.605	140.832	165.927	152.831	310.912
7_+_53415	NM_001146053	Htatip2	0.877076	Inf	1.40224	2.4255	0.919897	385	397.964	423.351	424.811	396.34	6.25	17.1355	19.3717	30.2825	6.43411	10.5396	13.8501	18.8685
9_-_15551	NM_010482	Htr1b	2.66461	0.722917	0.792647	1.26932	1.57909	2914.55	2956.28	2985.01	2967.63	2966.78	127.009	72.7621	50	33.7853	62.7037	30.5641	7.89397	4.34936
5_+_15194	NM_010414	Htt	0.154749	0.596455	0.71913	0.693447	0.393662	2141.91	1986.81	2000.28	2051	2261.53	8.25893	8.82353	6.5445	10.7345	11.0461	5.75783	2.72362	2.26901
11_-_15574	NM_008316	Hus1	2.13504	0.323254	0	0.282848	2.75776	3679.56	3696.63	3667.79	3676.09	3682.29	8.48214	6.01023	5.75916	3.9548	5.14875	3.69016	1.64942	1.57707
1_-_381314	NM_198653	Iars2	0.0256561	0	0	0.0237399	0.740405	357.533	361.867	360.377	360.818	359.718	87.5	74.6803	89.267	83.7288	31.8221	24.297	17.1346	18.1141
9_-_108837	NM_001081282	Ibtk	1.93005	0.492809	0.368191	0.713702	1.02962	918.208	913.898	911	916.154	907.344	37.0536	32.6087	52.6178	37.7401	15.6616	11.6392	8.93195	9.09555
1_-_70375	NM_027407	Ica1l	0.339628	0.753461	0.946107	0.970366	0.743947	1424.08	1290.75	1445.12	1370.14	1369.58	15.1786	6.13811	5.49738	5.08475	5.74523	2.65169	1.31915	1.51409
9_+_56542	NM_001163780	Ick	0.168697	0.239784	0.321834	0.252516	0.258457	3168.84	3153.96	3118.16	3269.97	3755.91	5.58036	7.16113	7.8534	9.60452	5.64333	6.92899	4.63823	3.27988
19_-_15925	NM_031156	Ide	1.83664	5.71462	6.81298	12.9618	1.28643	1084.71	936.886	1074.08	835.782	1105.04	27.4554	23.913	22.7749	23.9548	46.4585	27.1475	26.6993	14.0299
9_+_67834	NM_029573	Idh3a	0.334148	0.354197	0.501952	0.633704	0.583706	658.275	624.253	613.299	632.428	650	157.143	101.023	90.5759	62.2599	87.6249	63.2548	54.7233	34.4708
X_-_15931	NM_010498	Ids	2.83798	1.07782	1.20207	1.96222	2.48233	2825.22	2850.95	2901.69	2771.38	2919.45	33.7054	38.8747	37.9581	52.5424	23.2691	20.218	11.1814	11.358
2_-_72500	NM_030244	Ier5l	0.249772	0.376369	0.274749	0.506387	0.246017	385.818	740.7	503.142	617.167	690.419	22.3214	18.0307	18.8482	17.5141	15.4479	16.4807	23.65	22.3279
4_+_212632	NM_001205173	Iffo2	2.65054	0.34227	0.567153	1.1344	1.82422	3510.7	3841.33	3691.45	3846.88	3734.97	27.9018	32.8645	25.9162	21.0169	26.0801	29.8457	32.3331	19.1068
11_+_70110	NM_027320	Ifi35	0.0334728	0.210879	0.132552	0.188285	0	130.698	125.767	100.981	136.106	121.451	6.69643	20.7161	12.3037	16.2712	6.51769	16.2295	16.3696	20.8576
2_-_71586	NM_001164477	Ifih1	0.154705	Inf	1.22475	0.483454	1.28115	528.341	569.8	698.358	683.815	594.156	2.23214	13.555	7.06806	10.8475	1.58651	6.85013	2.53607	3.08416
19_+_15958	NM_008332	Ifit2	5.8762	0.426479	0.481028	1.01726	2.95489	2041.54	2037.56	2039.54	2049	2038.27	8.03571	12.532	13.6126	10.8475	4.87946	6.46768	6.37951	5.6782
16_+_15975	NM_010508	Ifnar1	1.25881	0.315062	0.502143	0.646239	0.711968	3483.51	3176.28	3325.89	2940.88	3347.44	9.59821	11.7647	11.2565	9.60452	23.6384	20.3155	13.4069	12.7426
5_-_67661	NM_026298	Ift172	0.00767067	0.142455	0.132958	0.0745151	0.0495643	691.025	1098.73	359.987	446.4	777	3.34821	9.84655	10.4712	11.6384	4.11409	4.68611	2.93292	3.11177
2_+_245866	NM_172150	Ift52	1.47036	0.844933	0.746261	0.781837	1.50932	666.872	658.172	655.052	644.692	640.848	12.9464	14.7059	17.0157	20.791	13.6889	16.348	19.6651	18.1105
16_+_73916	NM_028680	Ift57	1.84091	0.153409	0.102273	0.153409	0.671165	171.733	187.333	186.808	166.286	176.909	9.375	12.6598	12.8272	16.1582	9.23175	7.94985	11.1561	17.6166
5_-_12589	NM_009879	Ift81	0.13883	0.0721918	0.0601598	0.631678	0	578.83	586.019	597.111	575.381	605.214	11.8304	9.20716	5.49738	11.6384	11.291	7.78514	6.92941	7.99712
7_+_16001	NM_010513	Igf1r	1.00142	0.841141	0.70125	1.18224	1.51842	6480.02	7123.64	7093.31	7098.16	7057.41	121.875	125.575	110.209	91.8644	91.8563	78.6672	67.153	51.9194
6_-_140488	NM_023670	Igf2bp3	0.385772	0.954549	0.978584	1.1954	1.11921	1917.39	1992.8	1959.76	2081.62	1997.3	34.5982	25.5754	26.4398	26.4407	19.2424	17.0849	15.8116	10.5418
1_-_16011	NM_010518	Igfbp5	0.946942	0.0185981	0	0.0649805	0.528899	4383.91	4393.06	4396.48	4382.68	4384.44	142.857	13.6829	36.3874	34.1243	97.4041	9.27738	13.9513	17.5823
3_-_242050	NM_001162884	Igsf10	0.263355	0.996988	0.511276	0.79759	0.49672	393.134	390	404.789	408.14	404.54	7.36607	27.2379	33.7696	72.4294	5.68224	9.07677	5.51021	8.29577
3_+_78908	NM_207205	Igsf3	7.0493	2.4009	2.5302	2.38168	8.51724	2962.09	2963.94	2980.73	2973.75	2971.43	11.8304	7.54476	8.37696	6.89266	6.51253	4.05807	6.39841	10.0889
4_-_230233	NM_026079	Ikbkap	0.686158	0.322779	0.299723	0.270095	0.670214	655.611	666.323	665.209	670.56	652.498	51.7857	50.8951	41.623	36.9492	29.8115	30.826	28.5316	17.5268
X_+_16151	NM_010547	Ikbkg	0.618917	0.327412	0.50819	0.706967	1.04117	2266.17	2597.56	2826.16	2519.03	3005.82	19.4196	16.3683	20.4188	22.4859	19.5595	13.1023	10.9049	14.862
1_-_22779	NM_011770	Ikzf2	0.643679	0.0350915	0.261962	0.224167	1.01091	7387.52	7243.33	7243.33	7318	7256.91	5.35714	3.06905	3.14136	2.48588	4.24009	1.56014	1.87017	1.63899
7_-_67143	NM_175115	Ikzf5	1.45991	1.17981	1.26654	1.14138	1.23451	2697.33	2783.03	2746.04	2671.36	2751.38	26.7857	27.7494	23.0366	20.904	12.7345	14.2093	10.613	6.83129
16_+_16155	NM_008349	Il10rb	1.2026	0.40991	0.470756	1.13265	6.23346	697.008	692.613	693.788	697.202	694.219	23.6607	18.6701	24.6073	22.1469	34.1413	41.3882	63.07	62.8484
X_+_16164	NM_133990	Il13ra1	1.06929	0.931217	0.885761	0.923325	0.861593	1543.12	1888.01	1652.06	1668.25	1652.69	18.5268	23.4015	47.644	35.4802	10.6195	12.3595	16.7965	12.8674
14_+_171463	NM_134437	Il17rd	2.07974	1.40358	0.835594	1.54557	1.57811	5520.25	5898	5410.7	5898	5513.29	2.23214	5.11509	3.66492	8.58757	1.54604	2.6731	1.04362	1.17179
2_+_16181	NM_001159562	Il1rn	0.140214	0.1712	0.0929552	0.0723532	0.167273	1411.19	1415.4	1377.63	1420.49	1420.14	4.46429	10.7417	11.2565	28.7006	8.37608	14.3602	15.6265	18.6644
14_+_16188	NM_008369	Il3ra	0	0.0528736	0.016523	0.033046	0	162.319	149.833	110.711	220.769	124.683	4.01786	5.75448	3.40314	6.77966	11.2012	16.6067	21.0489	31.6604
7_+_16190	NM_001008700	Il4ra	0.159733	0.274139	0.208891	0.181328	0.147043	996.797	1207.63	1023.01	1036.22	1043.72	42.1875	43.734	89.5288	98.8701	58.6023	41.037	65.9546	53.8294
13_+_16195	NM_010560	Il6st	1.01405	0.602394	0.573165	1.07565	1.32524	2714.31	2479.47	2477.71	2641.59	2640.14	40.1786	121.483	122.775	176.158	61.7663	103.685	65.3649	73.5754
3_+_67781	NM_026374	Ilf2	0.252682	0.234893	0.311092	0.225682	0.209767	570.942	569.721	530.918	603.464	562.183	39.9554	28.0051	32.7225	21.5819	50.9982	29.3932	33.2271	22.2869
1_+_27993	NM_178601	Imp4	0.244374	0.344887	0.463987	0.296782	0.270012	921.277	863.221	1173.21	806.139	1158.2	31.25	24.9361	18.8482	19.661	30.0075	25.5965	18.9885	14.9679
3_-_55980	NM_018864	Impa1	0.902665	0.282765	0.199821	0.376907	1.17286	1211.11	1214.66	1209.04	1208.56	1213.47	41.2946	36.445	39.5288	29.8305	28.5588	23.8563	25.412	14.6793
18_+_114663	NM_053261	Impa2	0.056276	0.389344	0.328998	0.291612	0.168828	867.333	605.556	1188.46	475.882	965.897	4.01786	3.32481	4.45026	4.40678	4.99168	3.28105	2.7132	3.13622
4_-_242291	NM_177730	Impad1	2.89189	0.788504	1.05555	1.8875	3.49442	4040.01	4087.64	3819.05	3989.84	4138.93	98.6607	90.665	89.7906	78.6441	59.7837	50.6855	58.4454	58.6922
19_-_16319	NM_016692	Incenp	0	0.147368	0.421053	0.327485	0.267943	296.308	295.67	304.526	292.229	298.681	20.3125	9.71867	9.1623	5.31073	31.7934	14.5578	17.99	10.9684
6_+_71777	NM_023626	Ing3	0.201189	0.137311	0.179346	0.170693	0.79211	833.167	1034.09	1242.41	1482.95	1265.17	5.13393	5.6266	5.49738	5.19774	4.90415	6.09633	4.8508	3.7635
6_+_28019	NM_133345	Ing4	0.369729	0.0692254	0.251263	0.205579	1.11903	777.015	822.696	791.25	811.914	799.986	5.13393	8.69565	9.1623	16.1582	5.40818	8.09096	7.13248	12.0657
7_-_233875	NM_153580	Ino80e	0.534906	0.29101	0.46029	0.616245	0.471787	792.497	625	697.212	737.873	630.795	11.8304	14.4501	14.3979	14.3503	26.9935	22.8619	24.4061	17.8763
1_-_16329	NM_008384	Inpp1	0.126891	0.49323	0.370704	0.293144	0.337386	958.594	1577.67	1615.3	1381.73	1736.71	5.35714	6.90537	2.87958	7.34463	4.87325	4.31482	8.09287	6.23579
11_+_19062	NM_008916	Inpp5k	0.470213	0.313475	0.38749	0.280478	0.366223	911.512	733.444	991.829	1003.95	873.296	2.00893	5.24297	4.97382	6.10169	4.40871	5.49332	4.92992	6.15666
1_-_72999	NM_001271532	Insig2	1.93648	2.55922	3.30846	2.19062	1.15331	1085.35	1191.42	1257.18	1301.63	1188.67	33.2589	36.1893	36.6492	37.1751	34.9161	44.7369	49.9042	32.2274
8_-_16337	NM_010568	Insr	0.509372	0.35632	0.371396	0.277272	0.629686	3847.69	3838	3573.33	3664.77	3731.56	13.1696	13.1714	11.2565	15.0282	9.17809	7.58916	7.46724	6.16605
8_+_70885	NM_027590	Ints10	0.00272827	0.0595445	0.088214	0.0814283	0.0721751	245.439	281.732	341.955	364.48	339.067	9.15179	5.6266	6.5445	6.77966	14.5977	11.016	9.51817	6.75885
3_+_71793	NM_027927	Ints12	0.262781	2.35435	2.31375	2.67908	0.393006	236.941	296.174	312.308	223.31	282.644	20.5357	16.624	15.1832	13.3333	11.1466	8.2964	7.94974	5.95008
11_-_70422	NM_027421	Ints2	1.7172	0.0897884	0.107746	0.387658	2.84423	1915.55	1937.96	1931.75	1942.19	1926.71	27.9018	18.4143	21.2042	14.6893	14.0549	8.48893	5.77749	4.28734
1_+_77065	NM_178632	Ints7	1.28773	0.764506	0.442013	0.641259	0.559147	1191.17	1237.44	1205.14	1329	1278.78	15.1786	14.4501	13.6126	10.3955	14.9138	9.87777	8.12384	4.77321
4_+_16348	NM_010569	Invs	2.03526	0.785109	0.803218	1.51297	1.63564	2013.43	1786.36	1835.95	1824.58	1942.3	7.36607	4.73146	3.14136	6.77966	5.50914	3.6545	2.59584	1.98263
10_+_69718	NM_027184	Ipmk	0.370875	0.415278	0.472238	0.459919	0.574452	2987.83	3336.58	3450.39	3133.46	3031.81	8.48214	9.71867	6.80628	8.13559	8.09388	4.85846	5.22227	2.40835
14_+_70572	NM_023579	Ipo5	0.733575	0.366878	0.400874	0.306532	0.593844	646.139	728.959	724.093	718.514	678.957	239.509	167.008	165.969	150.96	163.031	101.656	82.0804	61.8768
1_-_226432	NM_153774	Ipo9	0.665529	0.175762	0.211296	0.272081	0.309882	1467.47	1247.11	1505.55	1361.41	1465.7	88.1696	65.2174	86.6492	55.2542	70.1576	43.8276	29.8724	25.817
4_+_16351	NM_008389	Ipp	0.34324	0.531469	1.28438	Inf	0.0460606	951.38	723.349	577.457	294.438	971.361	9.59821	5.88235	4.18848	6.89266	3.37294	1.90767	1.22766	3.15702
4_-_230767	NM_198026	Iqcc	0	0	0.0409947	0.0486812	0.0576962	857.369	894.2	1026.58	942.333	940.307	2.23214	5.49872	5.49738	8.47458	4.76257	3.106	4.55843	3.58302
5_-_74239	NM_028833	Iqce	0.160992	0.122626	0.0830539	0.140107	0.155726	2366	2231.67	1957.65	1859	2320.18	2.00893	2.17391	5.2356	4.51977	4.93419	3.54754	4.7417	3.80454
7_-_29875	NM_016721	Iqgap1	1.31388	0.315793	0.344454	0.45777	0.670707	1691.33	1624.76	1712.01	1726.15	1748.49	68.5268	84.9105	82.9843	64.8588	123.866	94.2034	59.4302	37.9271
6_+_108960	NM_001113553	Irak2	0.997531	0.114187	0.161306	0.248098	0.423898	1138.9	1094.86	1089.27	1077.82	1093.04	14.2857	14.4501	5.75916	6.21469	35.0276	40.7765	36.1853	20.4636
15_+_266632	NM_029926	Irak4	0.391359	1.07952	0.69398	1.13258	0.259567	888.6	1252.5	1065.88	788.706	928.093	3.125	3.32481	4.45026	4.85876	5.79258	5.88187	4.30766	3.97551
9_+_64602	NM_022655	Ireb2	1.97368	1.04064	1.0372	1.83813	1.49476	2263.27	2546.7	2458.88	2511.33	2538.17	53.5714	58.5678	78.534	60.339	26.7211	26.0554	17.314	13.0146
8_+_16363	NM_008391	Irf2	0.573673	0	0.158691	0.226702	1.89107	1214.39	1216.74	1217.45	1215.12	1202.09	13.6161	11.3811	8.90052	9.9435	2.98295	2.64146	1.69653	2.90725
7_+_272359	NM_178757	Irf2bp1	0.046208	0.0259331	0.0198034	0.0294375	0.0172887	418.034	428.44	430.625	420.029	431.711	11.1607	8.18414	9.1623	10.1695	10.3617	8.26306	9.95742	12.5738
8_-_270110	NM_001164598	Irf2bp2	0.253374	1.45636	1.23105	1.09015	0.573541	2090.94	1762.08	1942.44	1761.02	2092.24	101.562	103.069	134.817	121.017	30.4222	37.9066	36.3983	35.0213
14_+_16391	NM_008394	Irf9	0.85729	0.523688	0.311231	0.278537	0.45991	947.684	972.842	973.754	984.722	952.906	4.24107	17.6471	9.42408	17.9661	9.23505	24.7469	14.7862	18.927
8_-_384783	NM_001081212	Irs2	3.04838	0.560197	0.656092	1.48511	1.48511	2316.29	2309.93	2305.22	2318.54	2297.04	20.0893	19.4373	15.9686	11.1864	9.54635	10.904	5.27725	4.03683
8_+_54352	NM_018826	Irx5	6.70996	1.23377	2.19599	2.01299	4.93182	551.398	536.388	541.772	541.303	552.098	14.9554	7.289	8.63874	6.89266	5.32222	3.24409	4.43926	4.12183
18_+_66307	NM_025478	Isoc1	2.93452	0.550023	0.609631	1.59286	1.227	2174.13	2108.7	2114.68	2200.36	2269.03	22.5446	37.8517	28.7958	40.904	11.8453	21.6126	12.659	10.9427
6_-_57905	NM_133934	Isy1	0.0484312	0.135209	0.129252	0.087312	0.217562	989.285	881.795	914.594	741	1049.33	43.5268	31.8414	23.0366	25.7627	12.6517	8.50205	10.3071	5.66316
8_-_71927	NM_028007	Itfg1	0.357467	0.652766	0.361754	0.363684	0.314315	531.245	532.743	541.697	538.996	513.304	52.9018	64.1944	72.2513	96.6102	35.9722	36.818	36.6631	35.8587
6_-_101142	NM_133927	Itfg2	0.914736	0.538351	0.540526	1.04636	3.72906	855.865	859.457	850.444	869	841.623	7.8125	5.75448	5.2356	6.89266	6.52966	4.63181	4.49189	4.00767
9_+_319480	NM_176922	Itga11	0.574554	0.28046	0.372007	0.545414	0.56092	1292.9	1360.39	1301.45	1294.24	1295.78	6.91964	21.2276	13.089	22.9379	6.0652	12.2404	4.37292	7.61863
2_+_16401	NM_010576	Itga4	3.0442	1.14375	1.42434	1.59581	1.17586	5449.04	5619.35	5936.97	5213	5955.9	6.91964	3.70844	4.45026	3.38983	6.82499	3.79749	4.00002	1.97326
9_+_104099	NM_001113514	Itga9	0.11367	0.390622	0.222301	0.104572	0.287977	1585.52	1932.93	1358.58	3018.6	2965.78	3.34821	3.96419	3.9267	4.18079	6.88802	4.94116	3.7254	4.64818
8_+_16412	NM_010578	Itgb1	1.87096	0.993285	1.19118	1.46259	5.124	858.826	887.642	872.993	901.095	885.373	595.759	605.115	628.272	542.034	1119.09	1208.31	1084.36	2589.62
12_-_16413	NM_008403	Itgb1bp1	0.0515176	0.152467	0.140472	0.114581	0.056965	289.619	306.471	296.682	283.391	268.849	26.5625	43.4783	36.1257	32.9944	20.5682	27.011	36.1693	32.6742
14_+_223272	NM_145467	Itgbl1	0.417658	0.301311	0.383739	0.412788	0.365232	920.217	872.278	927.362	988.305	947.665	20.0893	54.7315	30.8901	76.1582	20.1284	49.4954	30.2627	45.4969
14_-_16432	NM_008410	Itm2b	0.463063	0.22195	0.335895	0.346123	0.334786	747.257	754.207	749.407	761.347	752.907	146.875	240.153	257.33	339.209	347.289	548.279	608.862	771.945
6_-_16439	NM_010586	Itpr2	0.339831	0.83111	0.690881	0.668147	0.460307	2034.43	1527.53	1914.84	1234.25	1575.74	3.79464	5.75448	5.2356	8.24859	4.38447	4.31295	4.02165	4.61257
2_-_73338	NM_001163528	Itpripl1	0.18216	0.0967401	0	0	0.873622	1749.45	1757.06	1765.76	1770.38	1750.84	7.36607	5.24297	5.49738	5.08475	5.04154	2.5462	2.27008	2.07242
2_+_56357	NM_019826	Ivd	0.157138	0.211924	0.23958	0.212341	0.259323	1348.2	1462.02	1586.44	1330.07	1583.59	11.3839	12.2762	10.733	15.3672	16.2171	12.0307	14.2378	10.8167
18_+_73473	NM_173441	Iws1	0.0946624	0.665449	0.50789	0.315486	0.246359	1256.92	1689.6	1921.71	2089.21	2138.45	43.9732	35.6777	29.8429	27.1186	12.5031	9.64579	6.77974	4.88123
4_-_16451	NM_146145	Jak1	2.06215	1.12433	1.0072	0.716647	1.40936	1066.17	1051.86	1061.32	1060.75	1072.99	106.25	116.752	137.173	147.458	84.0227	76.2329	64.6094	61.641
19_+_16452	NM_001048177	Jak2	2.11587	1.16603	1.16288	1.56765	2.54783	876.673	870.355	775.355	825.467	841.269	27.0089	18.0307	19.6335	24.7458	22.6404	13.0747	9.06263	7.23661
16_+_67374	NM_023844	Jam2	1.4822	2.37685	2.10979	6.11573	0.663205	833.896	565.779	903.985	810.149	798.575	15.1786	17.2634	17.5393	16.4972	10.6836	13.5183	7.36825	4.72705
9_-_83964	NM_023277	Jam3	0.591051	0.225181	0.234988	0.21652	0.787107	967.904	957	962.84	969.392	966.009	50.6696	44.757	46.0733	59.887	28.1513	26.9587	36.6096	34.3072
13_+_16468	NM_021878	Jarid2	2.96498	1.0313	2.44933	7.21908	4.18964	1269.41	1291.64	1261.74	1182.8	1247.89	3.125	5.37084	5.2356	7.45763	3.80383	2.62685	1.65733	2.11929
12_+_104771	NM_024205	Jkamp	0.117364	0	0.309671	0	0.171351	638.328	637.128	636.154	639.756	638.444	36.6071	36.5729	46.0733	46.7797	35.3567	37.8426	41.9378	38.6585
17_+_72106	NM_028101	Jmjd8	0.32274	0.101552	0.121481	0.142548	0.114855	2473.69	1384.31	1631.52	1838.8	1602.18	2.90179	2.94118	5.2356	5.64972	4.79177	5.28405	5.53562	8.22023
3_+_23922	NM_206924	Jtb	1.22059	0.839154	1.15635	1.22059	2.58765	294.249	287.253	289.581	289	290.21	38.8393	63.4271	57.3298	76.9492	23.0349	35.935	44.1493	54.314
4_-_16476	NM_010591	Jun	1.20169	0.74999	0.914254	1.06515	1.08811	883.87	919.518	982.104	961.741	956.003	110.268	81.0742	82.7225	84.6328	51.1053	32.9033	32.1332	42.0193
10_+_23924	NM_011835	Katna1	2.76364	Inf	4.31818	Inf	11.6591	141.677	144.082	145.654	144.462	145.025	40.8482	34.399	34.0314	36.4972	18.1473	20.0549	18.2249	19.5443
5_-_231912	NM_153572	Katnal1	Inf	6.25616	2.80296	7.34975	4.47291	1740.94	2755.93	2806.18	1398.41	2372.65	6.25	3.58056	4.45026	6.21469	9.67744	6.92512	4.72866	6.17384
6_-_74287	NM_019715	Kcmf1	0.0847287	0.23095	0.242188	0.205955	0.19621	478.217	427.158	461.334	460.789	543.442	90.1786	89.8977	78.2723	63.8418	42.9164	42.1096	43.4855	29.5124
18_-_106931	NM_134112	Kctd1	0.888366	0.359266	1.24545	0.550874	0.258671	331.533	558.75	313.957	396.538	346.546	10.7143	5.88235	6.80628	10.9605	3.35461	2.015	3.58121	4.17165
7_-_233107	NM_146188	Kctd15	0.0244647	0.0494403	0.0519069	0.0262995	0.0415255	1353.58	1396.25	1414.94	1549.12	1483.67	14.5089	14.4501	13.3508	14.0113	10.2967	8.60746	6.15511	6.76064
17_+_66989	NM_025888	Kctd20	0.904046	0.272698	0.287809	0.369152	0.619955	2279.9	2348.5	2322.52	2368.61	2373.17	53.5714	60.8696	60.9948	65.5367	26.5257	25.7977	20.4302	20.0531
1_-_226823	NM_172650	Kctd3	0.269188	0.0927606	0.591749	0.1578	2.48283	1015.52	1018.25	1013.74	1014.27	1015.41	25	16.8798	17.2775	16.3842	17.6886	10.697	8.41008	9.38996
17_-_69259	NM_027008	Kctd5	2.15054	0.953513	0.988237	1.02646	1.27025	1612.39	1578.63	1595.66	1600.65	1637.52	40.1786	36.9565	45.288	28.4746	27.1936	27.4282	28.874	24.7942
5_+_212919	NM_172509	Kctd7	6.26367	0.246264	1.57213	1.37562	2.32362	2386.57	2346.43	2394.6	2328.18	2366.5	1.5625	2.55754	2.87958	2.71186	1.22324	1.31229	1.4613	1.91696
5_-_243043	NM_175519	Kctd8	0.68847	0.381841	0	0.27047	0	841.811	796.545	835.077	858.5	857.385	7.36607	1.6624	5.2356	4.40678	3.31744	1.16775	1.82093	2.6564
14_+_105440	NM_134073	Kctd9	0.146	0.090193	0.379837	0.102456	1.11592	1772.1	1772.29	1768.77	1761.44	1773.35	38.3929	39.6419	35.3403	33.4463	35.3977	27.3617	19.5602	8.70794
9_+_68304	NM_212445	Kdelc2	0.621373	0.20765	0.376551	0.457993	4.50917	1943.6	1943.99	1945.64	1946.43	1946.32	45.9821	44.757	38.4817	68.9266	14.9504	15.6344	13.3276	20.196
7_+_68137	NM_133950	Kdelr1	2.64422	1.3811	1.24027	1.46662	1.53435	690.634	651.283	656.834	657.256	684.45	75.6696	117.136	104.45	197.062	89.7265	106.553	115.963	138.9
5_+_66913	NM_025841	Kdelr2	6.29401	2.67814	3.09169	6.0923	3.89852	937.527	950.019	936.105	963.178	946.84	349.777	411.893	472.251	465.424	199.374	235.009	303.793	260.15
17_+_193796	NM_172132	Kdm4b	1.03529	0.415337	1.14829	0.687139	0.565645	1410.25	1430.95	1330.32	1175.77	1309.08	4.91071	9.84655	14.6597	10.9605	3.71067	4.21699	3.8324	4.38688
6_+_214899	NM_145997	Kdm5a	1.16726	0.468274	0.487577	0.759815	1.57024	2637.62	2633.05	2687.24	2681.66	2646.11	29.2411	33.5038	34.2932	40.226	10.905	10.8161	8.07192	8.67891
1_+_75605	NM_152895	Kdm5b	1.5302	0.928581	1.00602	1.63549	1.87578	1017.73	1066.28	1119.7	1160.61	1068.38	14.2857	21.4834	22.7749	27.9096	21.1754	22.2846	12.2609	21.1823
X_+_20591	NM_013668	Kdm5c	0.0666578	0.050127	0.0395676	0.0365824	0.0444653	2413.7	2583.2	2076.56	2591.51	2842.13	22.9911	18.4143	14.3979	23.0508	23.4949	21.1107	14.088	13.955
X_+_22289	NM_009483	Kdm6a	5.83823	3.7094	4.19324	3.85108	3.68913	780.587	803.694	782.288	803.4	796.548	10.9375	7.54476	11.7801	10.5085	7.53436	6.48266	5.84809	7.81862
9_-_50868	NM_016679	Keap1	1.37729	0.658786	0.626478	0.885875	2.14425	775.507	734.12	742.707	714.776	775.211	22.3214	31.4578	32.7225	34.3503	10.4178	11.9039	12.8743	18.738
15_+_13992	NM_010158	Khdrbs3	0.362408	0.128396	0.223657	0.378515	0.753808	434.902	435.273	438.119	443.908	444.369	89.9554	51.4066	51.0471	36.1582	14.3709	10.4763	10.9613	9.71196
14_+_219094	NM_027143	Khnyn	1.10244	0.36247	0.653635	1.09208	1.13092	3357.55	3160.21	2501.77	3324.71	3289	7.36607	6.01023	3.66492	8.58757	5.08273	3.02768	3.43483	2.76773
12_+_77480	NM_001081378	Kidins220	0	0.0867055	0.0698856	0.0861216	0.492677	1640.6	1639.81	1638.72	1640.85	1641.55	43.9732	72.89	59.9476	86.4407	35.4707	32.3622	20.7826	91.2512
19_+_16551	NM_010615	Kif11	Inf	2.7194	4.65891	1.94961	Inf	756.8	910.452	964.733	1025.04	961.882	16.2946	7.67263	6.5445	1.9209	25.3111	9.57653	7.7673	1.71886
2_-_16558	NM_001081133	Kif16b	0.975981	0.277612	0.216885	0.28918	0.847364	1282.69	1257.05	1348.95	1265.16	1267.35	9.15179	12.9156	11.5183	13.3333	4.44136	3.95172	2.61172	2.8094
1_-_16560	NM_008440	Kif1a	0.184198	0.121918	0.141531	0.23793	0.30692	2679.97	2783.17	2461.81	2656.24	2733.35	11.8304	29.0281	21.7277	23.0508	28.6672	26.9144	11.3938	8.03827
13_-_16563	NM_008442	Kif2a	0.543082	0.603903	0.537727	0.530839	0.44138	985.998	1043.44	1009.65	1063.86	1116.83	98.4375	68.2864	73.822	56.7232	38.1817	28.486	20.1583	15.106
11_+_16568	NM_001290806	Kif3a	0.569429	2.50461	0.926503	0.324878	0.196454	1622.38	1285.11	1129.9	1331.3	1652.54	18.75	19.9488	19.8953	20	9.44132	9.98102	11.1155	15.0966
2_+_16569	NM_008444	Kif3b	1.81765	0.415038	0.523483	1.06878	1.64611	2761.44	3068.6	2802.86	3029.4	2885.52	11.6071	16.1125	15.7068	17.7401	13.4863	12.048	9.6022	7.55522
12_+_16570	NM_008445	Kif3c	0.0291263	0.0337784	0.0338145	0.0617086	0.0519826	1504.34	1469.64	1179	1306.47	1642.79	5.58036	2.17391	4.97382	5.31073	7.67453	6.41755	5.95082	8.97902
3_-_170643	NM_001170985	Kirrel	5.58714	4.12301	4.03003	8.24174	7.43861	3086.95	3788.21	3717.55	3896.74	3896.74	25.8929	14.7059	16.2304	14.0113	67.4044	41.833	21.5969	16.3494
7_-_232943	NM_001286039	Klc3	0.273343	0.485944	0.53012	0.182229	3.15863	181.621	190.889	180.579	189.75	182.429	2.00893	4.85934	2.09424	4.74576	2.46021	3.60658	4.83355	4.95839
12_+_194655	NM_178357	Klf11	0.670549	1.49302	1.84139	5.27534	Inf	1450.03	1591.75	1764.43	2317	1573.15	1.78571	1.79028	2.6178	1.46893	1.53483	1.36498	1.63655	2.48239
14_-_16597	NM_010636	Klf12	1.44623	0.567318	0.711628	1.8456	1.48497	6910.62	7067.43	6523.17	6744.61	6912.64	3.125	7.67263	4.71204	10.7345	2.67912	3.4773	1.30916	9.53275
8_+_16598	NM_008452	Klf2	0.0238402	0.108822	0.0743098	0.0919736	0.314484	448.64	433.825	463.289	447.904	445.231	71.4286	30.5627	49.2147	49.9435	15.8554	10.2624	22.7796	34.9714
5_+_16599	NM_008453	Klf3	0.789815	0.498986	0.578827	1.03883	1.17005	3530.37	3511.6	3548.9	3563.65	3594.71	90.8482	70.9719	88.4817	97.6271	45.3608	36.0571	16.8167	13.3104
4_-_16600	NM_010637	Klf4	0.479353	0.29178	0.122855	0.124277	1.03037	973.569	970.729	973.215	972.259	973.604	66.7411	66.4962	76.7016	66.7797	19.7891	32.171	25.8664	32.0524
6_+_76788	NM_029742	Klhdc10	19.2946	20.2282	4.65508	7.6994	9.1805	3419.51	3122.96	3302.87	3356.79	3522.26	25.4464	25.1918	28.0105	22.0339	16.2235	15.907	13.643	13.0049
12_+_69554	NM_027117	Klhdc2	0.0306376	0.064788	0.105197	0.0699039	0.0871601	453.431	393.536	430.489	387.414	423.11	114.509	118.159	110.733	107.684	38.9844	38.6577	53.6036	42.4513
1_+_213417	NM_144810	Klhdc8a	0.744791	0.706069	0.682764	0.710541	1.07778	702.529	701.052	697.441	736.187	696.555	60.2679	60.3581	58.9005	58.1921	12.6077	15.1415	15.3361	13.9124
1_+_240756	NM_153128	Klhl12	0.0964763	0.174334	0	0	0	1412.94	1429.35	1422.3	1432.22	1425.67	6.91964	7.80051	7.06806	7.57062	4.6799	4.94085	5.2004	3.65932
8_-_77113	NM_178633	Klhl2	0.628983	0.137057	0.186954	0.220463	0.548066	1015.95	1064.87	1060.74	1081.97	1039.76	45.5357	27.8772	25.3927	20.339	15.2189	11.3292	8.27623	5.66525
2_+_277396	NM_177784	Klhl23	0.950827	0.323833	0.456009	0	4.67674	2054.19	2054.6	2058.33	2040.67	2053.61	18.9732	7.289	3.14136	5.19774	7.51316	2.03323	1.82328	1.13988
16_+_75785	NM_029436	Klhl24	0.550546	0.835114	0.426484	0.382334	0.559285	3117.2	2983.33	3310	2987.37	3310	9.375	25.7033	40.5759	37.8531	3.893	12.0523	9.98173	14.0421
12_-_66689	NM_025707	Klhl28	7.61078	2.68616	2.94731	8.28232	8.00251	3313.47	4070.69	3801.17	3326.59	4216	5.80357	6.13811	7.59162	6.77966	8.73216	4.722	3.96912	2.43359
5_+_71778	NM_175174	Klhl5	0.301851	0.0894915	0.117296	0.157743	0.376869	1007.29	989.271	990.066	998.473	1011.74	34.5982	27.11	33.7696	36.6102	19.11	16.015	17.9501	14.9979
5_-_246293	NM_178741	Klhl8	1.25	0.654762	0.763889	1.38889	1.10119	893.056	736.182	857.048	890.286	819.756	2.45536	2.68542	1.83246	4.63277	2.09038	1.76681	1.40849	3.68258
6_-_74253	NM_001033171	Klrg2	0.873145	0.73707	0.311837	0.382252	0.987485	514.122	442.167	469.357	591.714	575.4	1.33929	1.79028	1.83246	2.25989	1.02886	1.52817	1.3563	1.1655
16_+_16646	NM_008465	Kpna1	5.77915	1.65279	1.84267	2.49187	4.56693	2234.81	2292.1	2285.08	2287.47	2294.83	36.3839	33.7596	29.8429	25.4237	42.5748	30.0451	22.3731	13.7424
14_-_16648	NM_008466	Kpna3	0.862018	0.122254	0.150511	0.325485	0.407442	2132.3	2151.59	2155.48	2155.46	2192.61	94.8661	59.9744	59.9476	56.6102	65.0025	43.5267	24.8481	15.1163
3_-_16649	NM_008467	Kpna4	1.63526	0.288999	0.364408	0.612839	1.06258	1823.57	1840.8	1829.97	1818.91	1829.18	199.554	153.325	142.67	130.96	31.762	30.9585	28.308	45.2216
4_-_16650	NM_008468	Kpna6	1.523	1.61805	1.39421	2.53812	2.87138	3699.35	3720.01	3574.41	3670.04	3847.01	59.8214	50.6394	65.1832	66.6667	40.2941	34.5334	11.2117	8.13846
6_-_16653	NM_021284	Kras	6.25445	2.86702	6.24293	9.09948	2.46876	1859.87	1893.51	2039.61	2026.25	2085.12	101.786	70.844	76.4398	57.4011	46.3906	30.4895	21.1313	13.0148
10_+_52705	NM_178610	Krr1	0.599157	0.64339	0.370941	0.384359	0.576917	1575.89	1381.73	1480.32	1565.75	1478.11	24.5536	26.5985	24.0838	22.2599	18.5881	15.4304	15.8809	13.4251
12_-_217666	NM_145443	L2hgdh	1.33202	0.599057	0.509786	0.831371	Inf	1161.1	1426.2	1262.34	1274.6	1392.17	10.9375	6.01023	12.5654	7.23164	6.50158	3.65566	6.34682	2.85888
1_-_212442	NM_145381	Lactb2	2.22345	5.89323	11.1648	9.39032	1.98268	163	153.818	200.387	245.876	211.241	19.6429	19.1816	23.2984	18.7571	9.60828	13.1492	13.6035	12.3788
10_-_16773	NM_008481	Lama2	0	Inf	1.67797	0.186441	0.466102	157.172	167.315	152.871	163.819	144.506	12.0536	25.7033	18.8482	17.6271	11.9467	15.3585	12.7883	8.75001
1_-_226519	NM_010683	Lamc1	1.12065	0.530151	0.642102	0.996955	1.28202	2105.57	2398.18	2283.95	2309.1	2167.76	44.4196	37.9795	42.9319	34.3503	109.067	119.96	116.59	128.331
5_+_66988	NM_024434	Lap3	0.914377	0.684846	0.579605	1.68142	0.953778	275.973	238.846	261.142	251.712	235.698	127.902	118.542	108.901	100.791	58.3848	51.6687	54.0374	39.5519
3_+_214048	NM_001040399	Larp1b	0.444818	0.110662	0.263023	0.0436264	1.72411	538.449	532.512	534.966	532.667	543.143	19.1964	18.5422	14.1361	7.11864	7.31382	7.5867	6.3054	4.9519
15_+_207214	NM_001080948	Larp4	1.10126	0.315932	0.352542	0.442683	0.683462	3202.56	3548.07	3443.25	3414.64	3451.09	55.1339	45.0128	47.3822	31.9774	44.821	33.5601	24.4888	11.8692
13_+_217980	NM_172585	Larp4b	1.01286	0.233218	0.0782026	0.561831	8.47045	3472.62	3478.5	3477.33	3483.68	3477.75	61.6071	54.4757	59.4241	37.6271	47.5971	39.1745	35.635	33.9008
3_-_28036	NM_138593	Larp7	2.01438	1.07035	1.14973	2.08146	0.65699	213.645	222.514	226.612	229.447	225.25	55.1339	39.5141	42.1466	29.8305	14.6563	11.3185	14.7155	10.3605
9_+_102436	NM_153168	Lars2	0.0210259	0.0658138	0.0502196	0.0769447	0.0594362	432.277	706.492	551.455	590.045	580.151	13.1696	16.8798	17.5393	17.9661	164.918	196.876	166.762	238.233
10_+_16798	NM_010690	Lats1	0.913544	0.0768638	0.0941037	0.25562	0.642205	3374.04	3352.87	3368.15	3359.51	3374.38	55.1339	41.0486	45.288	39.887	26.1212	24.0075	21.7011	17.066
9_-_244864	NM_001033534	Layn	0.345023	0.203711	0.283408	0.31377	0.412518	1801.98	1508.2	1790.15	1800.95	1832.96	28.3482	53.7084	63.089	61.9209	30.0753	40.5323	39.1097	30.0445
17_+_77889	NM_029999	Lbh	2.32182	0.895805	0.69527	1.37151	1.4815	2262.14	2043.78	1901.32	1916.89	2021.08	82.1429	197.187	233.77	226.554	66.6928	104.454	114.537	107.836
2_-_329504	NM_177846	Lcmt2	Inf	0.358804	0.129568	0	0.0199336	49.0978	71.3636	95.4348	163	51.407	9.82143	8.82353	7.59162	9.71751	4.85455	5.34213	3.49888	4.926
9_+_16835	NM_010700	Ldlr	0.805618	0.135999	0.162677	0.326979	0.719616	1697.6	1689.67	1693.64	1696.55	1697.42	72.9911	169.949	158.901	76.1582	65.9568	124.725	70.8426	25.786
4_-_100017	NM_145554	Ldlrap1	0.0186132	0.0299962	0.0377812	0.033879	0.017384	1959.39	1891.6	2007.94	1965.2	2462	6.69643	7.92839	9.1623	11.0734	11.5202	8.74608	8.17235	10.0499
17_-_224640	NM_146075	Lemd2	0.416898	0.313572	0.380491	0.324052	0.997796	968.077	976.734	981.307	968.235	974.242	17.6339	28.7724	26.7016	28.0226	10.7221	14.0909	18.4809	19.4704
10_-_380664	NM_001081193	Lemd3	3.08564	1.0911	1.51094	2.22174	1.97643	1927.15	1907.34	1860.26	1906.16	1873.47	12.9464	7.289	9.94764	8.24859	8.92086	8.5023	7.83253	4.768
7_-_243813	NM_175529	Leng9	Inf	0	Inf	0	0	137.649	37	118.846	96.1111	132.76	1.5625	1.6624	2.35602	2.82486	2.21668	2.65205	1.99889	3.11632
11_-_66180	NM_176830	Leprel4	0.679715	0.378303	0.397173	0.431819	0.551949	423.435	415.617	420.835	417.131	417.81	108.482	86.9565	88.2199	132.203	72.8649	66.8246	64.6838	96.8206
8_-_68192	NM_026609	Leprotl1	0.162585	0.137651	0.194116	0.280182	0.288688	773.303	821.033	892.203	1026.62	986.294	54.9107	68.6701	58.1152	68.4746	22.469	26.2314	23.7928	21.539
13_-_56048	NM_018886	Lgals8	0.252351	0.130663	0.112513	0.127082	0.246517	1267.91	1275.64	1312.45	1355.1	1323.46	40.4018	56.1381	65.1832	72.4294	18.7551	27.4031	21.4355	23.2323
2_+_107515	NM_172671	Lgr4	1.73324	0.560755	0.491757	0.757491	0.917599	1574.6	1676.85	1632.5	1583.8	1592.59	29.6875	36.0614	28.0105	47.7966	19.8828	16.9807	9.71888	10.5483
13_+_218454	NM_172589	Lhfpl2	2.54785	0.501749	0.637602	1.05524	1.64757	3182.73	3178.21	3182.06	3194.41	3195.79	18.9732	28.0051	29.0576	34.9153	8.84259	13.3668	11.3853	11.3282
11_+_16882	NM_010716	Lig3	0.21841	0.482878	0.65996	0.385256	0.359998	1841.18	1802.16	1865.2	2147.1	1925.76	17.8571	16.7519	17.801	13.5593	11.508	8.28172	5.87031	2.99814
5_+_77569	NM_001256122	Limch1	2.27758	0.628598	0.770964	0.842915	1.5025	2281.78	2235.18	2454.58	2495.57	2376.33	3.79464	4.60358	1.83246	3.05085	4.73518	4.49816	2.34084	3.48771
9_+_29806	NM_013860	Limd1	1.45947	0.11546	0.269406	0.0939215	10.6874	2298.51	2301.53	2302.06	2301.37	2301.92	35.2679	31.7136	30.1047	27.2316	12.561	10.3544	8.55801	11.5933
11_-_67803	NM_172397	Limd2	0.130063	0.0769179	0.0660491	0.0580912	0.07772	668.304	669.476	693.986	695.912	670.829	31.9196	37.5959	29.8429	33.1073	19.4266	19.5233	23.9133	25.8306
11_-_16886	NM_173053	Limk2	0.279978	0.234203	0.369615	0.424948	0.817564	1291.77	1258.3	1291.11	1301.15	1300.14	29.4643	35.1662	30.1047	34.0113	22.6177	34.477	20.7583	18.9232
7_-_75660	NM_029377	Lin37	0	0.0398374	0.140603	0	0.154923	60.7778	57.6	58.7143	62.8	61.5	3.34821	3.58056	3.9267	4.74576	6.62691	6.35401	13.8549	28.4967
2_+_22343	NM_011699	Lin7c	1.0654	0.966176	0.839912	1.21138	1.34948	3082.15	3323.89	3203.9	3328.34	3240.34	80.1339	54.3478	55.2356	54.8023	34.7589	29.1696	22.2136	14.5156
7_+_67164	NM_026010	Lipt2	0.38872	0.0431911	0.119124	0.205158	0.369284	639	649.857	769.206	670.667	664.045	3.125	4.34783	2.35602	2.48588	3.06867	1.63425	1.49061	1.84568
16_-_56722	NM_019980	Litaf	0.472553	0.206433	0.24427	0.296794	0.418107	1387.41	1387.18	1393.41	1398.27	1388.22	95.9821	173.657	181.152	121.356	47.9172	97.7909	95.8004	58.8189
3_+_280411	NM_001163170	Lix1l	0.15779	0.870385	0.955751	0.401087	0.204343	1285.04	1116.31	1218.47	1209.26	1338.67	86.1607	76.8542	81.4136	94.6893	19.3483	26.6437	26.5397	37.7386
10_+_66225	NM_025431	Llph	0.065418	0.0636969	0.1025	0.0580371	0.0377115	313.244	325.184	330.135	338.58	325.946	132.143	129.156	131.414	112.09	49.4675	59.2491	69.89	94.8785
13_-_66890	NM_025828	Lman2	0.325233	1.06758	0.965388	1.25346	0.394602	1243.72	674.64	891.98	884.282	1221.33	79.4643	83.8875	78.0105	87.9096	84.0613	110.054	129.779	123.817
1_-_214895	NM_001013374	Lman2l	0.0744337	0.0963219	0.181184	0.0949033	0.22029	1569.31	1698.32	2005.4	2143.06	2003.47	9.15179	9.33504	9.42408	9.37853	12.5737	10.3237	10.8502	9.93936
5_-_56873	NM_020295	Lmbr1	0.459719	0.330055	0.663367	0.737466	0.938593	1316.79	2288.36	1401.45	1332.45	1725.92	5.58036	7.16113	8.63874	13.5593	10.7208	9.39791	5.51462	10.0516
1_+_68421	NM_026719	Lmbrd1	0.0991784	0.475352	0.5636	0.303421	0.18681	926.082	704.234	840.964	609.287	955.125	39.0625	46.4194	41.0995	46.8927	14.3238	15.1201	10.783	9.18636
15_-_105847	NM_178919	Lmf2	0.0269803	0.00423562	0.00584094	0	0.0914659	452.539	453.174	451.41	462.292	458.36	20.5357	20.5882	17.0157	19.774	35.6479	27.1235	27.6899	24.6182
18_+_16906	NM_010721	Lmnb1	1.45045	1.0533	1.11374	1.15444	0.423833	666.364	602.129	652.118	591.846	613.667	27.6786	13.0435	10.2094	5.42373	26.3773	16.4276	13.1736	4.93906
1_+_93689	NM_053106	Lmod1	0.0488707	0.0656665	0.0622906	0.0597148	0.0486698	805.438	815.786	826.188	826.951	846.898	87.5	56.5217	42.6702	44.1808	22.9522	14.0428	12.5015	13.0869
17_-_240028	NM_172827	Lnpep	1.16986	1.10783	1.20827	0.92288	1.0362	1878.28	1874.39	1774.51	1988.21	1727.85	8.03571	6.77749	7.59162	3.84181	46.8712	24.1084	4.95697	4.34262
5_-_140887	NM_080795	Lnx2	1.04714	0.434545	0.148577	0.453719	0.762575	1920.67	1775.12	1801.84	1862.08	1837.4	3.57143	2.42967	3.40314	4.51977	3.32937	2.47672	2.05847	2.08864
18_-_16948	NM_010728	Lox	4.96855	1.00578	1.1695	2.15871	2.51872	2916.52	2748.28	2823.49	2775.7	2842.8	912.054	2006.65	1726.44	1628.14	955.736	1661.63	1058.42	725.141
9_-_16949	NM_010729	Loxl1	0.152603	0.0907322	0.0931066	0.0815275	0.0948336	434.113	390.976	413.198	399.944	405.441	151.786	235.166	243.194	227.571	172.901	222.347	234.229	278.791
19_-_67573	NM_053083	Loxl4	0.706708	0.582692	0.708472	0.854958	1.264	1557.12	1788.88	1723.44	2038.15	1741.86	7.36607	4.60358	10.2094	6.55367	15.8364	10.6292	14.4195	10.2117
14_+_67168	NM_175116	Lpar6	0.131763	0.0922339	0.0941162	0.0627441	0.404072	194.31	176.111	239.739	248.877	194.425	18.0804	17.6471	17.0157	13.5593	14.3399	11.5871	8.89078	8.97165
1_+_226856	NM_001134829	Lpgat1	Inf	7.64825	12.8969	7.09103	Inf	3797.7	3828.93	4098.4	3805.09	4285.61	39.7321	42.1995	48.6911	42.4859	38.3627	29.8014	16.9886	13.942
3_-_99633	NM_001081298	Lphn2	0.708276	0.551163	0.518287	0.577869	1.15217	1152.86	1078.73	1121.21	1135.47	1130.9	47.9911	65.7289	89.5288	97.7401	21.3694	25.3432	26.2917	35.5706
5_+_319387	NM_198702	Lphn3	2.41507	2.34288	2.20506	11.8522	3.76698	1511.48	1449.2	1415.58	1571	1521.92	10.9375	3.06905	4.97382	8.58757	14.8676	9.66413	7.12928	8.52656
12_-_14245	NM_172950	Lpin1	1.49113	0.274385	0.433998	0.69223	1.3202	2160.22	2144.35	2113.91	2258.89	2127.95	5.13393	18.1586	17.2775	14.2373	2.73148	10.3831	10.1759	13.5376
2_+_64899	NM_001199118	Lpin3	0	0.190909	1.00478	0.581028	1.48485	489.694	520.667	534.182	496.88	501.395	3.34821	7.03325	13.089	9.15254	3.32749	5.70816	4.80789	3.36222
14_-_380916	NM_001033439	Lrch1	0.346154	0.169591	0.146341	0.32	0.121212	1625.53	1436.11	1583.75	1704.92	1765.39	14.7321	6.77749	6.80628	13.2203	5.11423	2.98496	2.15371	3.54902
3_-_269473	NM_001025067	Lrig2	0.605982	1.15409	0.916267	1.87922	1.13677	2189.49	2688.83	2131.17	2762.62	2779.84	5.13393	7.54476	9.68586	7.79661	3.5632	4.75347	5.05607	3.91681
6_-_16974	NM_008514	Lrp6	0.61805	0.735479	1.03192	1.6886	0.547232	1001.64	938.8	900.4	848.286	844.545	2.23214	1.91816	1.83246	1.24294	34.1068	35.7494	52.3434	59.7219
5_-_16976	NM_013587	Lrpap1	0.410584	0.51932	0.751252	0.656361	0.355536	895.272	946.591	976.032	795.403	895.05	24.5536	36.0614	32.4607	62.8249	33.1509	33.5747	36.8945	46.6913
9_-_214345	NM_001146048	Lrrc1	0.0569925	0.0453975	0.0457127	0.0207327	0.0287517	892.426	678.548	822.632	762.762	944.854	6.91964	4.85934	5.49738	4.63277	9.27502	5.08296	4.98683	5.40417
15_+_223664	NM_145471	Lrrc14	0.113854	0.336486	0.395139	0.16321	0.138617	1236.71	1341.62	1070.95	843.923	1022.11	12.9464	10.6138	10.2094	17.2881	9.16788	7.62145	9.9261	12.2666
13_-_68732	NM_026825	Lrrc16a	0.739723	0.0704498	0.188865	0.383378	0.255665	812.742	805.717	824.464	796.625	806.1	22.0982	12.4041	18.8482	13.5593	6.49563	4.64967	7.19815	9.1597
4_+_72946	NM_201226	Lrrc47	5.07877	3.63998	4.36268	6.15847	3.36807	1579.49	1565.75	1569.45	1598.37	1583.01	24.1071	24.2967	29.3194	19.774	12.9082	9.9239	7.78286	8.35622
16_+_320184	NM_177093	Lrrc58	0.756006	0.10096	0.182268	0.153546	1.38724	7385.98	7378.95	7384.89	7381.4	7383.67	110.938	120.205	138.482	106.328	118.058	100.355	133.716	89.2575
11_+_98238	NM_133807	Lrrc59	1.10026	0.621202	0.673772	1.01189	1.41109	1481.94	1460.69	1504.66	1487.84	1497.76	167.857	165.345	139.005	121.582	137.459	123.544	101.731	64.03
5_+_100604	NM_133897	Lrrc8c	0.856281	4.80806	5.28005	1.73607	2.24461	2564.97	2287.31	2757.13	2754.25	2786.19	56.0268	29.6675	41.3613	34.9153	47.1274	22.2569	23.6955	18.1958
5_+_231549	NM_001122768	Lrrc8d	1.1749	0.554944	0.922995	0.94972	0.545752	708.481	718.274	756.107	716.13	728.16	23.6607	17.9028	24.0838	21.9209	28.0768	19.6444	16.4856	17.0555
15_+_66725	NM_025730	Lrrk2	0.62963	0.0666667	0	0.166667	0.25641	472.571	492.65	480.679	492.306	483.205	17.8571	14.3223	18.8482	17.6271	9.31447	6.89512	7.65375	5.1295
19_+_68852	NM_001013019	Lrrn4cl	0.134006	0.055633	0.0313215	0.0566827	0.0570763	1569.41	1465	1673.04	1793.52	1592.16	2.67857	14.3223	14.6597	22.1469	2.46065	19.7469	21.0142	64.7258
4_+_116748	NM_001163266	Lsm10	0.0203348	0.0180319	0.0297845	0.0152053	0.00432767	398.547	401.525	413.029	358	414.496	13.1696	13.4271	13.3508	14.1243	13.2616	14.9088	22.8892	21.1244
11_-_72290	NM_028185	Lsm11	0.321793	0.66941	2.01419	0.480704	0.452894	2001.1	1848.12	1732.85	1892.62	2724.07	16.7411	9.59079	6.80628	8.58757	5.13377	2.53612	2.73496	1.25303
11_-_268490	NM_172947	Lsm12	1.9258	0.960549	0.972583	1.32828	1.74032	837.605	1306.49	1154.56	1412.78	1133.14	102.455	57.1611	121.466	36.6102	42.7996	38.8401	42.9428	50.2707
10_+_16987	NM_146006	Lss	0.12691	0.328262	0.325939	0.321205	0.341328	1509.32	1403.06	1666.8	1827.18	1674.57	25.2232	78.6445	60.9948	29.9435	13.9412	46.942	29.5142	12.749
17_+_268977	NM_206958	Ltbp1	1.61369	0.304944	0.429961	0.621778	1.40468	1194.01	1176.78	1151.78	1174.36	1193.89	41.0714	32.6087	51.3089	62.3729	126.979	60.6953	49.4994	40.7338
16_-_78913	NM_001081068	Ltn1	0.533827	0.564332	0.531774	0.532084	0.384989	1052.32	983.579	1053.31	1071.86	1090.31	36.6071	31.3299	29.5812	27.6836	20.1686	14.1177	9.29543	7.60619
2_-_17076	NM_013825	Ly75	1.93874	0.206976	0.601054	0.679645	1.53843	1629.52	1600.26	1638.55	1633.41	1621.09	13.8393	5.6266	8.90052	4.97175	15.4893	5.66045	4.11289	2.63349
15_-_23936	NM_011838	Lynx1	1.70133	0.319407	0.424075	0.719933	1.08174	3273.33	2709.6	2923.56	3052.52	3074.1	6.69643	7.54476	8.11518	16.2712	7.6598	7.92455	6.91292	9.18722
4_+_108755	NM_175364	Lyrm2	0.238095	0.387521	0.802721	0.295739	2.21805	150.237	151.309	150.562	149.379	150.659	33.2589	28.6445	30.3665	32.4294	9.69518	10.9818	15.7384	27.0867
6_+_67636	NM_001163628	Lyrm5	0.214673	0.146981	0.156259	0.168036	0.148227	902.715	728.265	837.834	920.298	884.277	29.4643	30.0512	31.6754	48.1356	12.4861	18.1084	22.113	20.3526
4_+_69151	NM_026963	Lzic	0.0841086	0.357436	0.360581	0.201138	0.240742	1349.86	1365.43	1429.18	1177.02	1435.3	30.8036	29.156	23.2984	31.1864	8.77734	8.09487	8.0092	10.0432
9_-_93730	NM_033322	Lztfl1	0.0251624	0.0580774	0.0454823	0.0372889	0.052322	707.568	1220.61	918.578	698.034	1263.82	12.0536	16.3683	15.1832	26.8927	6.17992	8.90151	11.3421	9.17173
16_+_66863	NM_025808	Lztr1	0.326701	0.148202	0.192315	0.261069	1.41781	515.542	516.398	505.731	508.979	518.873	49.3304	50	49.2147	70.5085	42.4292	36.693	47.9018	55.392
19_+_226154	NM_145503	Lzts2	0.0105123	0.0227278	0.0389636	0.0198393	0.0372212	855.197	995.562	1085.93	943.303	1163.98	21.4286	19.821	25.9162	28.3616	24.5792	28.7871	43.1382	44.3541
6_+_17113	NM_010749	M6pr	1.09746	0.279797	0.364178	0.511883	0.52919	1134.47	1174.45	1176.97	1166.67	1174.88	184.821	108.951	123.298	102.034	86.6009	62.6155	62.0351	45.3555
6_+_56150	NM_019499	Mad2l1	29.9414	12.9746	6.84375	25.0225	2.59492	332.2	444.308	644.5	818	818	2.90179	2.30179	2.35602	1.01695	48.7728	22.2221	28.7074	14.1356
X_+_107528	NM_053201	Magee1	0.341358	1.15208	0	0	0	544.678	545.574	543.944	546.23	544.715	64.9554	41.0486	54.712	69.2655	20.4226	14.2938	14.5361	16.237
6_-_66441	NM_025564	Magohb	0.409836	0.327869	0.874317	0.409836	19.3443	233.464	208.547	218.329	199.333	223.364	14.2857	9.71867	7.06806	7.45763	10.1547	8.34788	9.93524	15.0799
8_-_67920	NM_026453	Mak16	0.161316	0.0432464	0.155498	0.123938	0.384542	855.55	861.615	863.538	870.81	856.832	46.4286	59.2072	62.0419	45.1977	46.0122	42.8542	41.4101	30.2564
9_+_270118	NM_001013813	Maml2	1.31689	1.77386	1.56383	1.63168	1.82967	2660.53	2688.76	2649.78	2487.07	2687.03	20.0893	25.0639	17.5393	19.548	18.2621	22.0011	24.295	25.3402
3_-_17156	NM_010763	Man1a2	3.27856	1.07336	1.10673	1.32814	1.96152	2660.22	2644.13	2717.34	2847.76	2874.4	61.3839	53.4527	66.7539	65.1977	40.1247	31.1741	27.604	24.4257
7_-_140481	NM_172903	Man2a2	0.966102	0.441332	0.385179	0.560684	1.17377	2460.29	2541.95	2434.81	2601	2453.19	9.375	12.4041	13.089	17.0621	14.6024	10.7019	5.61347	14.3277
X_+_17161	NM_173740	Maoa	0.0152181	0.0327685	0.0518855	0.0199361	0.0395109	432.625	448.601	477.42	442.399	468.286	77.6786	52.046	62.3037	62.7119	49.6674	32.9835	29.594	18.7201
10_+_26396	NM_023138	Map2k2	0.340944	0.654618	0.403794	0.320513	0.186717	185.645	180.506	180.531	176.415	178.913	92.6339	116.24	107.33	122.26	101.211	118.561	132.419	124.407
15_-_26404	NM_009582	Map3k12	0.565905	0.103339	0.113181	0.129498	0.40651	446	504.462	522	554.571	504.462	2.90179	1.91816	3.66492	2.93785	20.704	20.5214	24.3446	27.4702
18_+_26405	NM_011946	Map3k2	4.72556	1.10894	1.33709	1.99121	2.99386	7817.24	7318.62	7222.77	7482.1	7549.83	26.5625	24.6803	25.1309	30.6215	16.4635	16.7693	12.2477	9.8464
11_+_26406	NM_011947	Map3k3	4.2483	1.59625	1.50484	2.66239	3.35505	2326.51	2337.47	2287.84	2310.41	2321.03	20.0893	21.7391	12.8272	14.9153	36.4067	22.4971	17.7166	12.5726
4_+_26409	NM_009316	Map3k7	0.495467	1.01646	0.974067	0.863316	0.942702	2025.91	1925.48	1876.31	1801.5	2340.91	80.5804	68.0307	83.2461	63.8418	23.2762	19.9645	14.733	10.1881
1_+_26921	NM_008696	Map4k4	0.231455	0.101333	0.12981	0.135765	0.360172	1168.91	1207.15	1090.82	1121	1159.74	120.982	132.097	134.817	113.333	54.4585	50.8546	45.0085	48.3501
12_-_399510	NM_201519	Map4k5	6.2113	1.78152	1.7696	2.53422	1.91594	1298.23	1297.93	1349.09	1311.94	1348.89	143.973	101.279	97.3822	89.3785	52.2039	33.3635	19.2332	16.5301
14_+_218975	NM_178684	Mapk1ip1l	0.79641	0.145008	0.109868	0.137941	0.789809	3687.17	3687.89	3685.4	3683.83	3685.46	182.589	174.425	147.644	128.701	125.817	114.652	104.27	68.7319
9_-_50772	NM_015806	Mapk6	0.0827619	0.0865136	0.0900849	0.061459	0.336877	1172.29	1172.5	1182.47	1175.41	1174.94	105.357	136.573	170.681	76.8362	115.335	154.214	200.007	78.6382
14_-_26419	NM_016700	Mapk8	0.124518	0.232197	0.13193	0.103368	0.217533	1820.48	1639.72	1804.75	1627.8	2052.82	15.1786	11.3811	13.089	10.2825	18.0479	13.034	13.9409	8.49155
2_+_227743	NM_177345	Mapkap1	0.990319	0.729104	0.910063	0.983531	0.715151	726.095	1011.39	820.121	901.282	894.41	26.1161	22.1228	22.2513	25.6497	27.1706	23.075	20.0623	26.3856
1_-_17164	NM_008551	Mapkapk2	0.785365	0.411075	0.469721	0.604082	0.536015	1255.83	1183.39	1259.51	1205.54	1287.14	80.5804	84.0153	90.8377	94.5763	61.1059	62.2997	65.4723	50.1707
2_+_13589	NM_007896	Mapre1	0.485011	0.583601	0.555158	0.512688	0.420281	1901.67	1684.91	1696.14	1679.25	1813.29	265.625	230.179	249.215	237.175	68.0006	56.691	47.6057	39.6965
18_+_212307	NM_153058	Mapre2	0.20045	0.1828	0.198086	0.210969	0.299244	2280.24	2126.14	2151.95	2134.19	2489.73	31.6964	35.8056	39.5288	48.5876	16.3533	13.0628	7.4096	8.70669
15_-_223455	NM_172606	March6	0.513842	0.47423	0.428107	0.578073	1.07577	2938.12	2999.45	3032.88	3096.22	3050.45	47.0982	40.9207	41.8848	44.0678	24.9601	18.6971	10.1862	8.58785
2_+_57438	NM_020575	March7	0.398816	0.173334	0.209157	0.195595	0.170138	1306.14	1309.79	1310.94	1314.86	1307.94	29.9107	41.688	38.4817	48.4746	32.4991	35.3342	25.34	20.9287
6_+_71779	NM_027920	March8	1.2794	0.0898816	0.0950489	0.253383	1.58629	3194.33	3199.65	3188.44	3197.32	3193.93	22.9911	41.4322	34.0314	39.774	12.439	21.761	13.375	12.6711
10_-_17118	NM_008538	Marcks	0.549745	0.387821	0.520545	0.759228	0.689952	1383.11	1437.71	1423.61	1435.24	1443.65	525.446	538.107	539.529	862.712	47.8556	56.5492	61.0607	98.5713
1_-_226778	NM_145515	Mark1	1.87224	3.2862	2.22992	2.6407	1.15586	646.061	626.875	522.862	775.923	724	12.5	8.31202	10.2094	11.5254	5.4895	3.18731	2.47291	3.25149
12_+_17169	NM_022801	Mark3	0.404463	0.182687	0.346441	0.548293	0.277153	323.866	406.36	339.82	362.874	358.286	58.2589	61.2532	62.5654	62.8249	30.3557	30.2928	28.6953	22.9667
7_-_232944	NM_172279	Mark4	1.86169	0.568306	0.593441	0.896529	0.748202	934.545	924.412	904.414	933.372	939.723	41.7411	43.2225	42.9319	43.2768	13.4103	11.1249	10.6076	11.8354
1_+_212679	NM_175439	Mars2	Inf	2.21976	Inf	Inf	Inf	1999.91	2385.12	1949.95	2213.36	2229.51	14.2857	10.8696	11.7801	8.36158	6.47691	4.10736	1.10016	1.58686
2_-_67121	NM_025979	Mastl	1.62643	1.71679	1.67726	0.935197	0.847099	1126.74	1230.1	1440.18	1663.71	1291.84	16.0714	6.26598	6.28272	5.76271	8.35385	3.45896	2.17968	1.36668
15_+_17181	NM_016762	Matn2	1.83543	0.943129	0.773465	1.72272	3.41304	421.152	412.871	430.179	428.557	427.421	13.8393	15.7289	20.6806	29.2655	8.29741	8.05592	13.3332	19.7235
18_+_17184	NM_010771	Matr3	1.21795	0.646369	0.78367	0.683349	0.890318	786.017	744.423	773.539	793.584	761.65	116.071	98.7212	101.832	85.1977	63.9076	54.1596	46.6581	40.7692
12_-_17187	NM_008558	Max	5.02902	1.35506	1.60805	2.82767	2.81852	1202.12	1256.39	1230.99	1233.65	1234.02	45.5357	44.5013	42.4084	41.2429	37.8501	48.1493	50.406	56.7314
X_-_171170	NM_134163	Mbnl3	2.45986	8.97127	5.77345	15.6853	2.87467	6310.53	6031.47	5666.39	6252.44	6048.26	12.7232	9.71867	11.7801	5.9887	6.57826	4.47977	3.44967	1.39311
13_+_218121	NM_153546	Mboat1	0	0.312637	0	0	0.735617	1183.45	1189.68	1189.54	1207.65	1196.9	10.4911	3.32481	4.45026	2.25989	5.13736	2.65103	2.24153	1.63732
12_+_67216	NM_026037	Mboat2	0.0763016	0.123288	0.240864	0.279642	0.152055	1166.2	1191.51	1104.28	1293.37	1720.28	9.59821	6.39386	4.97382	4.51977	3.77976	3.39167	2.00491	2.59778
11_+_103537	NM_134012	Mbtd1	4.50746	1.58227	1.22429	1.46592	3.05877	2963.66	2818.75	2865.76	2950.62	2795.96	14.2857	10.1023	14.3979	14.5763	13.5426	11.6097	13.8866	10.7712
18_-_328949	NM_001085374	Mcc	2.24637	0.674319	0.667054	1.5182	2.25115	4068.6	4099.1	4323.32	4673.78	4225.03	9.375	9.71867	9.42408	7.68362	7.0567	6.10294	2.4438	2.38341
3_+_17210	NM_008562	Mcl1	1.68964	1.71323	1.38286	1.86722	1.67508	1357.09	1251.79	1319.76	1270.04	1324.84	169.196	189.386	166.23	177.74	31.9318	30.8621	31.4481	35.182
7_-_210711	NM_145955	Mcmbp	0.508674	0.516855	0.716237	1.25756	0.396007	640.323	713.054	721.495	694.311	712.792	49.5536	24.8082	31.1518	26.1017	38.3994	19.2982	16.154	14.746
8_+_244329	NM_173189	Mcph1	3.54657	0.727501	0.469938	0.304654	0.544182	1518.24	1321.94	1521.83	1550.41	1549.61	11.3839	6.77749	4.45026	5.76271	7.59463	3.85999	4.34735	3.41537
X_+_68995	NM_026902	Mcts1	0.174651	0.358336	0.61701	0.170917	1.12307	175.957	180.392	182.915	185.02	182.482	107.143	88.8747	92.4084	102.712	25.5887	29.3893	35.9252	37.8673
6_+_16543	NM_175088	Mdfic	2.3365	0.645163	0.994949	0.978143	1.21408	2224.81	2163.67	2175.33	2189.24	2184.02	41.5179	68.5422	69.6335	70.3955	16.4995	24.15	22.7464	14.836
17_-_74762	NM_001081160	Mdga1	0.0560217	0.164667	0.1695	0.170006	0.145522	1944.65	2008.29	2813.25	1422.86	2301	3.125	1.02302	3.66492	3.61582	5.43291	3.25261	3.62005	4.16762
1_-_17248	NM_008575	Mdm4	4.83852	2.47214	2.33383	10.2087	2.56548	4725.69	4916.28	4580.62	4981.79	4821.24	30.5804	25.8312	29.3194	34.5763	23.3518	16.0482	16.2481	17.1368
9_-_17436	NM_008615	Me1	0.458774	0.698202	0.560745	0.464343	0.639132	1055.64	887.192	896.547	937.955	1020.7	168.527	130.946	143.979	141.243	75.1295	63.8341	61.5037	47.9035
18_-_107029	NM_145494	Me2	1.25289	1.34484	1.36385	2.70766	0.427647	538.797	555.338	590.077	539.27	501.62	34.375	24.8082	29.0576	20.226	32.7456	22.9382	22.5276	14.0351
X_-_17257	NM_010788	Mecp2	0.792048	8.97188	1.89645	8.52743	0.709615	7716.03	7640.88	8066.11	7327.83	7907.53	14.9554	12.7877	15.1832	19.322	6.19372	4.32592	2.84376	2.90654
11_+_66172	NM_025397	Med11	0.00703147	0.0282913	0.0853762	0.0479992	0.120994	366.701	364.912	368.344	389.609	382.733	12.7232	20.0767	16.7539	18.1921	9.20812	9.47856	14.4769	11.5959
X_+_59024	NM_021521	Med12	3.54802	0.114789	0.483321	0.417414	0.091831	183.507	193.286	176.842	197.029	177.803	10.9375	7.289	8.90052	8.0226	11.1428	7.94407	9.09914	33.2111
11_-_327987	NM_001080931	Med13	0.751415	0.553496	1.06824	0.717091	0.877151	2604.04	2472.28	2227.3	2886.67	2961.15	42.8571	32.8645	38.4817	30.8475	30.6743	15.5158	6.92379	8.51018
5_+_76199	NM_172424	Med13l	3.48644	0.239965	0.452627	0.977632	2.13606	2228.17	2418.78	2335.56	2366.26	2361.37	39.2857	35.5499	49.2147	48.0226	12.6708	15.0505	29.097	29.233
2_+_381379	NM_025885	Med19	1.31768	2.49396	2.0723	2.0723	2.03678	1139.93	1083.39	1147.96	1118.08	1138.15	16.0714	18.4143	16.2304	15.4802	11.1934	12.2001	16.9993	10.5708
6_+_108098	NM_025315	Med21	0.10341	0.0389113	0.0705696	0.0542048	0.170733	303.368	302	304.495	306.951	304.002	57.5893	48.5934	47.9058	45.1977	55.6035	44.7548	51.1617	59.3727
7_-_75613	NM_029365	Med25	0.0581123	0.176498	0.156327	0.167133	0.0884821	1156.82	1681.32	1732.84	1787.45	1456.2	21.4286	17.3913	20.9424	23.7288	17.6505	19.2994	17.6764	20.1007
7_-_67224	NM_026042	Med29	0.243759	0.204495	0.274776	0.247176	0.056283	248.069	164.459	230.563	527.55	252.692	13.6161	13.1714	10.4712	8.81356	16.217	17.198	17.3331	14.9397
11_+_66213	NM_001104557	Med7	0.170029	0.208385	0.412603	0.0409328	0.52394	252.569	249.766	249.55	252.688	251.439	91.5179	68.4143	84.8168	78.1921	43.27	48.5756	44.3584	52.003
4_+_80509	NM_001290688	Med8	1.86113	0.503392	1.24923	0.701517	6.21749	313.801	312.49	315.364	314.573	313.885	45.5357	50.6394	42.9319	41.3559	21.5292	21.3834	24.6167	21.8871
11_+_192191	NM_138675	Med9	0.130165	0.1243	0.109653	0.0980136	0.0961288	509.039	442.471	538.329	409.907	440.578	30.3571	20.9719	22.5131	20.904	13.7724	11.8603	13.6353	16.1855
7_-_17258	NM_001033713	Mef2a	1.33209	1.2556	1.40543	2.57225	2.01444	3381.81	3433.18	3475.76	3449.93	3525.71	45.7589	39.8977	48.1675	63.5028	25.6855	20.5174	20.5721	15.4091
13_+_17260	NM_025282	Mef2c	1.65251	7.78588	1.9703	2.5026	13.9828	2614.22	3755.27	3223.37	3568.05	3751.57	4.91071	4.4757	5.2356	6.55367	1.78075	1.70335	2.63133	4.61115
3_+_17261	NM_133665	Mef2d	1.06183	0.510889	0.561239	0.644845	0.485751	1078.85	1174.6	1094.31	1018.22	1035.07	13.3929	8.95141	12.0419	6.55367	13.3025	11.7812	5.90348	4.89149
18_+_70417	NM_001001979	Megf10	1.07271	0.118251	0.120788	0.24823	0	3405.58	3400.06	3412.52	3404.5	3410.88	7.14286	25.9591	10.9948	8.13559	5.3676	13.062	7.10233	2.23069
2_+_17289	NM_008587	Mertk	0.442105	0	0	0	0.401914	1348.93	1352.26	1362.71	1341	1362.38	6.02679	8.95141	5.2356	7.23164	4.52409	4.06136	2.72121	2.30477
7_-_80889	NM_030705	Mesdc1	0.0676355	0.0400803	0.0552749	0.0275552	0.0745155	639.665	643.2	640.037	644.76	644.436	30.1339	27.7494	26.178	22.8249	11.8287	8.23872	7.11838	5.41264
3_-_75624	NM_175224	Metap1	5.45066	6.64637	4.91894	4.34258	3.44165	1301.97	1270.93	1243.02	1259.91	1285.49	60.2679	43.9898	53.9267	39.435	37.7823	29.8663	26.4688	18.4057
10_-_56307	NM_019648	Metap2	17.9802	6.11207	6.31033	6.84705	2.8431	380.996	394.126	381.492	387.743	392.294	229.688	186.829	172.251	158.757	50.7085	43.0621	42.5718	34.6766
17_-_70083	NM_133719	Metrn	0.141227	0.67789	0.915152	1.77946	0.285985	146	194.48	160.429	159.467	174.451	5.58036	5.37084	3.9267	8.0226	12.404	12.8578	19.5203	21.3479
10_+_17299	NM_010792	Mettl1	0.561453	1.58228	1.70988	1.10359	0.808152	706.556	774.391	751.237	743.267	762.54	5.13393	4.85934	3.9267	5.64972	7.73142	7.0671	7.94959	8.4943
1_-_71449	NM_144877	Mettl13	0.0959719	0.12211	0.13365	0.0980583	0.125297	867.646	887.6	1058.83	1097.04	988.75	14.5089	19.0537	6.5445	9.49153	6.35273	5.39294	4.718	2.80442
11_+_67493	NM_026197	Mettl16	5.30021	3.59703	5.97442	4.28375	1.46087	698.005	779.07	788.284	783.833	748.01	28.7946	23.4015	15.7068	21.8079	14.5685	11.5381	12.4263	7.76361
1_-_67099	NM_025964	Mettl21a	0.705344	0.617044	0.614436	0.859354	1.70684	925.066	1019.23	894.479	936.587	962.247	19.1964	20.844	24.0838	30.1695	12.0075	14.1556	18.1285	19.1261
17_-_76781	NM_176917	Mettl4	0.514173	0.644956	0.761854	0.790071	0.285488	2470.18	2537.65	2733.5	3206.42	2795.86	6.91964	4.60358	6.80628	6.55367	5.72821	3.25481	1.70763	3.0253
14_-_67011	NM_025907	Mettl6	5.93266	Inf	Inf	9.58069	4.54468	718.114	672.569	709.913	678.178	717.968	14.5089	21.9949	19.1099	24.5198	14.3405	13.8252	16.1947	13.4686
7_+_59052	NM_021554	Mettl9	0.245107	0.0563545	0.139957	0.0873333	0.61412	492.425	489.619	489.213	490.659	492.632	94.4196	85.2941	104.45	113.559	24.5165	26.5662	43.6792	36.1806
3_+_72640	NM_001029890	Mex3a	2.22715	0.592238	0.59579	1.25892	2.25452	4113.63	4084.22	4119.88	3978.34	4135.59	15.4018	12.2762	12.3037	16.3842	6.0101	3.47351	4.80157	5.06309
7_+_108797	NM_175366	Mex3b	1.56568	0.195089	0.148438	0.384683	1.3006	1347.44	1344.35	1346.51	1340.46	1348.06	27.9018	22.3785	19.3717	17.4011	6.52285	9.82335	7.96902	6.68992
10_-_237400	NM_198615	Mex3d	1.77727	0.209091	0.123952	0.0547619	2.91923	858.672	846.448	845.891	837.952	857.535	45.3125	37.5959	54.4503	24.2938	12.36	15.1221	15.268	11.1357
2_-_67532	NM_026220	Mfap1a	15.1788	9.71266	8.35238	5.51137	22.8887	2314.57	2203.96	2339.37	2308.63	2344.22	10.7143	10.4859	12.8272	8.92655	4.29797	3.8044	3.82281	3.6734
2_-_100034361	NM_001081975	Mfap1b	0.516964	0.197746	0.183651	0.316393	1.84065	1052.78	1068.6	1072.22	1087.45	1068.94	41.5179	42.5831	43.9791	40.226	25.5108	26.8305	17.2723	20.7644
8_+_71306	NM_001177882	Mfap3l	1.93498	0.302678	0.467927	0.953394	2.39569	4619.35	4507.28	4520.27	4611.11	4630.12	18.9732	18.6701	23.822	17.6271	12.1797	6.4466	5.16271	3.74063
6_+_50530	NM_015776	Mfap5	0.0620523	0.0782209	0.0957806	0.104503	0.079988	358.904	322.164	330.392	326.708	356.836	135.938	193.606	251.571	273.672	76.8322	148.711	211.448	297.159
1_+_75734	NM_029409	Mff	0.68503	0.502711	0.418885	0.596253	0.587855	460.111	514.697	528.714	550.881	506.885	89.2857	118.926	99.2147	91.5254	61.5782	85.4842	89.6261	71.2756
8_+_52065	NM_001081279	Mfhas1	2.15706	4.74308	5.08778	3.46185	15.6632	2160.9	2051.48	2408.94	2340.93	2425.24	12.9464	20.3325	19.3717	12.8814	6.36072	5.75599	3.02288	3.59382
3_+_67414	NM_024200	Mfn1	0.604938	1.17778	0.957265	1.11111	1.10458	731.396	771.875	747.277	804.056	715.153	16.0714	18.9258	18.8482	22.8249	16.6014	19.2498	17.0316	36.0649
3_+_66868	NM_025813	Mfsd1	0.561358	0.614598	0.46847	0.60267	0.624408	862.379	822.751	835.312	857.778	876.848	85.0446	134.399	123.822	121.13	49.9691	78.341	72.9393	55.1127
11_+_69900	NM_178620	Mfsd11	0.0223092	0.0389125	0.0322252	0.0724231	0.0413302	798.119	794.488	791.198	844.25	789.385	9.59821	15.4731	14.6597	17.6271	37.5107	54.2278	66.3138	68.651
1_-_226844	NM_001081259	Mfsd7b	1.58511	0.0668793	0.353868	0.470406	0.75713	2263.22	2278.43	2270.71	2241.64	2277.6	23.4375	21.4834	17.5393	11.0734	9.42767	9.69212	9.56564	3.24151
3_-_72175	NM_028140	Mfsd8	3.67265	1.39721	4.09182	8.25017	6.38723	1091.02	1230.23	1222.75	1171.54	1220.35	14.2857	8.69565	17.0157	13.3333	2.60506	2.06483	3.08483	2.68268
2_+_29808	NM_001164274	Mga	0.175126	0.168899	0.128314	0.176883	0.202192	2945.87	2826.09	3069.58	3008.47	2947.75	25.6696	20.0767	22.2513	23.0508	26.5653	18.1326	7.23846	7.43571
12_+_217664	NM_146035	Mgat2	1.99022	0.850437	1.4144	1.29021	1.51782	653.622	692.016	691.538	696.733	669.411	135.714	107.033	113.613	85.5367	58.2361	47.9358	55.933	44.9244
19_-_76055	NM_023799	Mgea5	0.159634	0.153351	0.140784	0.156391	0.27476	1661.32	1686.79	1652.07	1667.02	1667.98	84.375	99.6164	93.7173	97.8531	85.7874	71.7509	59.4956	54.9808
7_+_17314	NM_008598	Mgmt	0.078069	0.275925	0.139921	0.086085	0.0224196	281.629	200.737	145.868	226.39	297.003	8.48214	19.4373	20.1571	37.7401	22.619	36.627	63.6715	82.3167
1_-_66447	NM_025569	Mgst3	0.0151599	0.00726136	0.0166874	0.00830454	0.00647937	386.566	353.565	285	285	288.773	5.13393	1.27877	1.3089	2.48588	19.1119	11.4909	16.6097	33.7334
13_+_218613	NM_172593	Mier3	3.48233	1.28694	1.012	2.4203	3.91282	3393.1	3318.13	3322	3331.83	3363.73	27.2321	20.844	18.0628	22.0339	17.1311	12.1839	5.58366	3.67543
16_+_67014	NM_025910	Mina	1.41429	0.394068	0.505814	0.889535	0.75	361.415	392.766	375.581	393.308	378.725	24.7768	17.3913	17.0157	16.0452	9.80917	6.30134	4.63352	2.99101
19_+_17330	NM_010799	Minpp1	0.788279	0.220247	0.157876	0.48293	0.495556	974.352	976.462	978.69	977.677	975.459	29.0179	25.9591	32.4607	24.6328	32.9661	28.9672	35.8318	35.7636
6_+_252875	NM_145374	Mios	0.521355	2.18969	2.06456	1.78303	2.75275	424.689	371.782	325.074	387.021	368.408	17.4107	15.601	12.3037	17.7401	16.948	9.38223	6.67042	5.65315
12_-_217653	NM_172578	Mis18bp1	1.2935	0.679086	0.768014	0.282953	0.842121	702.579	593.28	588.938	601	697.5	16.7411	6.13811	8.63874	2.71186	12.1945	4.83582	4.75956	1.93296
6_+_27418	NM_013791	Mkln1	0.0158571	0.104816	0.0954326	0.0434342	0.0393932	245.106	508.146	424.474	552.779	464.822	33.7054	24.8082	24.8691	31.0734	87.3463	84.2493	56.3465	85.9845
6_+_67027	NM_023290	Mkrn2	0.0843818	0.131833	0.226826	0.135225	0.370508	1076.99	1000.58	919.941	879.744	1199.84	16.9643	10.8696	11.2565	14.4633	7.98518	5.7703	4.75696	3.89075
5_-_109154	NM_175403	Mlec	2.28495	1.50914	1.3575	1.52377	1.19939	2887.82	2367.64	2578.06	2738.76	3224.85	124.107	157.161	172.513	203.616	118.502	110.603	76.046	77.8412
8_-_74568	NM_029005	Mlkl	0.00659341	0.136663	0.120055	0.0593407	0.0642434	246.092	256.517	267.067	253.82	273.226	12.9464	30.5627	29.0576	22.4859	5.41957	14.5456	14.7726	16.8619
4_-_70122	NM_001286158	Mllt3	0.583997	0.695527	0.558529	0.750454	0.428557	1874.45	2062.26	1760.27	2062.92	2085.81	19.1964	20.0767	13.6126	17.0621	12.6632	12.6511	8.21343	10.6165
17_+_17356	NM_010806	Mllt4	1.77767	0.254162	0.565422	0.628083	3.9019	1757.18	1767.06	1766.67	1760.94	1767.34	37.2768	34.9105	30.1047	32.5424	31.6785	35.2818	26.8983	28.7841
17_-_56716	NM_001252465	Mlst8	4.55953	2.73509	4.30338	3.88959	3.67243	1985.88	1448.62	1745.9	2053	2092.03	4.6875	6.26598	6.02094	8.36158	5.75518	5.39705	4.31564	3.55291
11_+_21428	NM_001159385	Mlx	0.381058	0.220991	0.280185	0.338882	0.524854	737.477	772.278	735.148	685.03	750.78	16.0714	15.601	17.2775	16.9492	16.2235	16.3132	24.1606	21.6931
5_-_77697	NM_029956	Mmab	1.32864	2.13315	1.43392	2.51656	1.50924	1520.97	1291.91	1440.8	1615.71	1497.44	7.8125	18.1586	15.1832	14.2373	9.93857	20.4035	17.0323	18.9316
4_-_67096	NM_025962	Mmachc	1.23493	0.722787	0.918268	0.665566	0.798679	975.991	944.565	968.098	939.812	933.19	15.4018	13.0435	8.37696	11.2994	5.0357	4.05023	2.72153	2.87398
11_+_67468	NM_026178	Mmd	1.15963	0.484518	0.45037	0.575385	0.644444	1475.69	1458.03	1476.77	1463.3	1449.8	40.8482	24.0409	23.5602	19.774	66.8695	35.5594	40.6651	22.3681
3_+_17380	NM_008604	Mme	0.359156	0.330189	0.361477	0.440655	0.37528	2546.19	2659.93	2596.45	2346.64	2691.79	6.25	8.18414	10.2094	16.9492	9.28457	9.26435	6.20307	5.95086
14_+_17387	NM_008608	Mmp14	0.00344577	0	0.000561871	0.00107039	0.00621384	1722.45	1633.52	1653.01	1668.64	1692.95	20.5357	34.7826	29.3194	60.791	213.873	288.691	329.733	346.161
19_-_72199	NM_028152	Mms19	0.122736	0.0533133	0.165196	0.106627	0.243718	354.872	392.229	369.615	367.244	355.757	23.4375	20.5882	21.466	23.7288	17.5258	17.5244	17.1584	12.6794
7_-_101513	NM_028308	Mob2	2.9144	0.717391	0.866848	1.3913	3.18841	678.788	637.486	651.267	658.765	636.639	8.25893	9.59079	4.45026	6.89266	10.2105	10.6608	10.8701	32.3948
10_-_208228	NM_172457	Mob3a	2.77064	0.446427	0.637989	1.06767	1.43022	1794.31	1770.4	1826.18	1888.56	1903.5	13.3929	15.4731	14.1361	11.7514	36.6634	39.954	35.9295	30.2238
1_+_19070	NM_025283	Mob4	3.54568	2.6418	2.35846	2.44877	1.35166	1273.98	1099.95	1053.43	1122.71	1284.08	102.009	107.161	91.0995	85.9887	37.843	45.6029	43.7223	31.7791
2_+_69372	NM_001160330	Mocs3	0.701439	0.110681	0.167866	0.236061	1.32817	400.163	424	385.815	451.037	421.944	5.80357	8.31202	7.06806	8.0226	2.1269	2.01604	1.62522	2.74716
10_-_67074	NM_001163025	Mon2	0.530151	0.168341	0.251976	0.322092	1.33898	521.133	527.072	533.491	538.594	532.448	27.9018	34.9105	37.4346	37.0621	13.3273	13.9577	8.35895	7.99416
11_+_74522	NM_001159288	Morc2a	0.115483	0.184133	0.128608	0.0489087	0.171314	1321.3	1323.45	1363.23	1317.39	1313.61	25.8929	19.3095	18.5864	17.2881	20.236	16.3834	8.72686	9.79261
9_-_21761	NM_001039147	Morf4l1	0.0930484	0.201579	0.0991052	0.0837884	0.77738	602.461	602.526	585.947	603.096	588.417	282.366	289.514	309.424	308.701	255.055	298.003	327.107	307.824
10_+_59012	NM_021509	Moxd1	1.0736	1.16045	1.56818	1.41818	2.80182	1018.23	1113.1	1053.79	1073.11	969.892	6.91964	8.69565	4.97382	9.37853	6.88003	7.58916	8.62577	5.97843
11_+_268395	NM_010822	Mpg	0.0822552	0.122404	0.100803	0.067322	0.0716935	228.544	247.182	283.032	258.787	316.83	22.0982	23.7852	24.6073	29.9435	7.99946	11.3653	14.3151	16.3315
7_-_67973	NM_026483	Mphosph10	0.0875831	0.321138	0.214092	0	0.573949	83.0738	84.1803	82.3902	83.1818	83.4104	52.0089	41.9437	34.555	19.548	16.3101	15.8728	18.7566	16.8751
9_-_110119	NM_025837	Mpi	0.623463	0.376316	0.399335	0.426329	0.666097	341.407	324.844	349.796	260.722	338.182	14.2857	12.532	9.42408	13.6723	17.1192	18.8814	20.2513	14.4402
X_-_17524	NM_008621	Mpp1	0.147079	0.118471	0.0825002	0.127789	0.726322	382.097	386.657	383.614	383.196	383.556	92.4107	128.9	178.534	231.525	39.8387	58.7841	81.3049	92.3199
6_+_56524	NM_001164734	Mpp6	0.133497	0.459939	0.346258	0.475583	0.037546	365.51	399.571	318.44	330.183	249.027	52.0089	30.8184	31.4136	20.678	20.4645	12.9416	12.5783	5.26612
18_-_225651	NM_172630	Mppe1	0.942222	0.785778	1.248	0.562705	1.61778	587.357	588.857	571.685	610.642	611.426	12.5	16.2404	13.8743	18.3051	3.84276	5.62058	6.41487	5.46511
1_-_15064	NM_008209	Mr1	0.264646	0.200334	0.165785	0.234189	0.326611	1644.88	1749.8	1675.92	1667.69	1713.31	4.46429	7.80051	10.2094	13.2203	3.35365	9.72115	7.46879	6.54864
9_-_17532	NM_008624	Mras	0.294864	0.83523	0.951148	1.12254	0.666705	2053.97	1372.05	1708.28	2045.01	2119.65	9.15179	12.0205	20.6806	18.9831	12.4275	13.7032	9.17131	10.9845
11_+_17534	NM_008626	Mrc2	0.0162445	0	0.00420155	0.00370866	0.0151109	1264.59	1234.4	1242.96	1248.67	1242.98	3.34821	9.59079	11.7801	20.565	34.4378	54.1239	62.5571	76.0012
9_+_17535	NM_018736	Mre11a	0.0519225	0.292296	0.261732	0.281865	0.144641	677.919	562.015	591.462	849.706	790	29.0179	14.9616	13.3508	12.2034	21.1224	10.5205	4.56506	3.791
8_-_67873	NM_026423	Mri1	0.176085	0.113636	0.0823452	0.118577	0.112755	147.068	102.695	124.466	138.405	114.988	18.3036	22.2506	19.3717	18.1921	75.3938	80.172	125.472	172.299
11_+_107732	NM_026154	Mrpl10	1.09598	0.181785	0.244308	0.261541	0.888338	835.859	825.326	838.355	852.933	850.888	40.4018	45.3964	42.6702	48.2486	27.6943	29.1558	32.1173	36.7975
11_+_56282	NM_027204	Mrpl12	0.217691	0.247211	0.523472	0.0964245	1.38851	296.285	292.289	290.709	293.994	291.252	53.3482	52.3018	40.5759	38.5311	67.5158	46.2187	55.0481	40.4894
19_+_94063	NM_025606	Mrpl16	0.100119	0.22591	0.283611	0.143139	0.0489736	261.909	400.575	296.184	216.172	338.29	34.1518	37.468	30.3665	29.6045	19.2376	20.1139	25.8304	22.7826
7_-_27397	NM_025301	Mrpl17	0.0533696	0.0626711	0.0758231	0.0298538	0.0759539	206.668	210.684	219.252	213.739	208.54	127.679	145.908	125.393	132.768	41.8686	47.6445	53.6591	55.5394
6_-_56284	NM_026490	Mrpl19	0.0467933	0.156559	0.103333	0.0875159	0.0929869	973.426	987.143	981.638	700.831	1066.62	17.1875	14.8338	15.445	10.9605	19.7754	16.5591	14.0893	16.3789
3_+_67707	NM_026591	Mrpl24	0.283737	0.1033	0.220588	0.411765	0.083045	100.665	107.014	106.002	97.2143	99.7448	61.8304	79.2839	76.9634	98.3051	25.2528	24.5478	42.4689	40.8355
6_-_66223	NM_025430	Mrpl35	0.0868966	0.121935	0.0644318	0	0.146408	179.606	177.632	183.568	190.497	182.947	60.7143	56.7775	50.5236	49.3785	5.69301	4.66636	3.97347	3.84127
13_+_94066	NM_053163	Mrpl36	6.86603	12.7512	15.6447	12.2608	3.54418	355.914	420.412	372.203	417.686	357.172	37.9464	51.6624	40.0524	43.3898	29.309	28.7429	30.4315	33.7302
16_-_18100	NM_010922	Mrpl40	6.86269	3.11028	2.24954	4.26866	2.60862	152.584	175.3	189.204	135.652	159.716	48.4375	36.9565	30.1047	31.8644	20.5889	17.2816	25.2815	25.5638
7_-_67308	NM_023331	Mrpl46	0.0353214	0.0353214	0.172682	0.194268	0.0250668	134.129	137.484	132.116	127.929	135.224	20.7589	19.821	14.6597	16.6102	15.3711	15.7407	23.8368	18.6925
3_-_74600	NM_029017	Mrpl47	0.112345	0.521602	1.00148	0.886723	0.0596116	288.407	385.903	465.39	411.333	415.595	27.6786	26.8542	28.2723	16.7232	5.21702	4.07719	3.95307	4.79948
19_-_18120	NM_026246	Mrpl49	1.43723	2.38939	1.75547	5.12337	2.00254	712.106	641.554	560.426	758.924	626.097	29.0179	24.2967	27.4869	23.3898	14.6685	13.6726	13.5294	13.741
4_-_28028	NM_178603	Mrpl50	0.34431	0.205601	0.23532	0.27928	0.50871	1275.74	1146.55	1230.46	1339.3	1324.96	69.8661	50.2558	56.5445	46.7797	20.5553	14.8616	15.4007	15.5637
11_+_67212	NM_026035	Mrpl55	1.08425	0.478346	0.287008	0.584646	0.396206	114.392	157.722	128.425	112.071	116.042	17.6339	17.1355	18.3246	21.5819	23.1286	19.4478	20.724	30.5762
1_+_64659	NM_025474	Mrps14	0.164407	0.0270041	0.0483073	0.105398	0.179363	300.733	298.572	280.208	295.168	300.151	85.0446	89.0026	82.7225	83.7288	18.9544	25.9384	32.569	59.7709
5_+_66258	NM_025450	Mrps17	0.190981	0.203882	0.192462	0.219483	0.122491	488.059	546	557.081	620.427	609.364	54.4643	47.3146	44.7644	47.7966	42.1647	41.2836	42.764	50.4101
2_+_118451	NM_001166031	Mrps2	2.5128	0.634698	0.857457	1.22407	1.0162	1065.01	1084.37	1066.8	1095.02	1056.01	23.6607	24.6803	15.1832	18.5311	28.3105	23.7837	20.5341	16.8103
6_-_64658	NM_025578	Mrps25	0.187761	0.215463	0.219054	0.430143	0.104343	235.337	262.263	229.87	238.102	250.311	43.3036	42.3274	38.4817	38.1921	16.0805	14.7042	13.1121	24.3351
8_+_57312	NM_020560	Mrps31	0	0	0.0755319	0.125887	0	87	78	75.8438	96.0682	93	14.0625	12.2762	11.5183	14.2373	7.71735	4.67443	5.90133	6.23839
13_-_66128	NM_025369	Mrps36	5.88462	7.05	2.88462	4	2.475	221.179	222.646	234.18	239.175	227.89	87.7232	76.5985	77.7487	71.7514	41.3269	54.7244	51.4108	60.4678
2_+_77721	NM_029963	Mrps5	0.0821857	0.129643	0.128084	0.213632	0.0661569	362.691	909.178	651.038	582.455	661.589	16.2946	16.7519	11.5183	12.0904	15.4817	15.1168	15.5855	21.1207
11_+_50529	NM_025305	Mrps7	0.567461	0.654288	0.519523	0.398876	0.653946	365.387	375.525	358.46	355.327	370.54	45.0893	58.4399	52.8796	42.7119	21.0782	28.556	30.8886	20.5003
2_+_67871	NM_026422	Mrrf	0.00749236	0.0251433	0.0189154	0.0135462	0.0177339	879.4	686.981	669.368	616.98	763.866	11.8304	12.1483	12.8272	16.0452	16.6495	18.6558	20.1407	17.9427
13_-_380836	NM_001013389	Mrs2	0.303696	2.14453	1.53375	0.827953	0.387283	3894.42	2819.94	3249.94	2551.23	3567.13	20.7589	17.7749	17.0157	20.339	15.2536	15.8371	10.2984	9.07892
11_+_74026	NM_028722	Msl1	0.316187	0.190283	0.293488	0.247261	0.364074	1939.57	1928.9	1960.1	2107.82	2325.8	23.4375	24.9361	20.6806	26.8927	51.9761	37.135	45.8139	45.1729
9_+_77853	NM_001100451	Msl2	0.172848	0.162244	0.221979	0.211203	0.405191	1538.16	1510.35	1364.65	1674.9	1558.21	21.2054	18.6701	10.9948	15.2542	24.923	20.8733	20.6629	8.82774
X_-_17692	NM_010832	Msl3	0.425474	0.775256	0.710651	0.657536	0.89985	1304.25	1175.78	1260.83	1401.13	1272.3	50.2232	41.0486	35.0785	44.1808	23.4653	21.1538	16.6613	20.6606
13_-_17702	NM_013601	Msx2	0.236318	0.0544628	0.115533	0.141791	0.86847	753.614	743.615	649.474	838.667	719.312	14.5089	2.42967	2.35602	5.42373	9.72486	2.30198	4.61916	6.23056
19_+_23942	NM_011842	Mta2	0.875907	0.88671	1.09056	1.37037	7.99383	628.724	629.398	628.88	630.265	628.645	77.4554	86.0614	60.2094	51.8644	45.7593	46.4203	41.0862	35.3132
4_+_66902	NM_024433	Mtap	0.661416	0.364058	0.39837	0.435514	0.804279	923.944	831.835	878.17	839.334	873.265	179.911	108.184	115.183	91.4124	53.6526	35.1091	35.7731	24.0498
15_+_67154	NM_026002	Mtdh	0.271819	1.15111	0.886656	0.654493	0.542043	1293.51	1337.56	1297.16	1324.48	1421.88	135.938	122.123	118.848	105.876	56.7812	66.6983	74.1084	78.762
1_-_69821	NM_178051	Mterfd2	9.99648	3.13615	4.1162	5.64507	12.2833	228.664	225.439	226.389	224.492	222.973	12.7232	13.8107	15.445	12.5424	5.67199	5.78893	5.86008	5.96168
4_+_17764	NM_008636	Mtf1	0.237318	1.0871	1.26446	0.939053	1.06278	3084.97	3791	2558.52	3388.5	3219.91	14.5089	11.1253	15.7068	10.6215	3.42868	3.93938	2.78596	3.94818
6_-_17768	NM_008638	Mthfd2	1.12858	0.468574	0.615488	0.478845	1.9265	812.312	832.061	830.548	813.357	829.309	66.2946	91.4322	65.1832	55.9322	45.474	60.4209	46.6893	37.6666
X_+_53332	NM_016985	Mtmr1	3.38727	0.468286	0.644663	1.08537	1.4896	2339.5	2406.74	2451.71	2449.2	2440.72	4.24107	6.52174	10.733	8.36158	4.72996	5.04965	4.25835	4.66596
7_+_233315	NM_172742	Mtmr10	7.43894	0.706722	1.25261	1.90619	8.57484	2349.58	2347.93	2355.4	2355.36	2354.18	40.8482	32.6087	21.2042	18.6441	50.9373	26.1168	13.969	8.1633
15_+_268783	NM_172958	Mtmr12	0.0814204	0.0604292	0.0577234	0	1.14122	1990.98	1994.17	1991.55	1988.46	2007.76	13.3929	13.4271	10.733	10.7345	7.27926	6.26614	4.10144	2.93941
11_+_170749	NM_133215	Mtmr4	0.929566	0.768016	0.735729	0.931247	2.11015	1791.91	1732.61	1702.67	1749.5	1858.64	48.2143	39.8977	30.8901	28.7006	29.0786	16.0333	8.59717	16.8764
14_-_210376	NM_177594	Mtmr9	0.12283	0.110866	0.128349	0.15089	0.204914	2684.91	2623.81	2894.13	2678.26	2903.64	26.5625	27.11	26.9634	28.8136	25.9271	19.4818	10.3769	6.99462
9_+_68291	NM_026658	Mto1	0.00458403	0.00567547	0.00313644	0.00283773	0.0192799	2457.31	2191.4	2242.62	2522.5	2525.67	27.0089	20.7161	21.466	17.9661	7.34652	5.63239	5.10876	29.5862
18_+_67440	NM_026157	Mtpap	0.847692	1.98857	3.625	2.53091	0.8265	470.195	471.378	445.204	408.944	453	16.5179	20.0767	18.5864	18.0791	11.9619	10.1379	8.06899	6.51806
6_-_14489	NM_008098	Mtpn	1.57572	0.486934	0.491037	0.920123	1.17721	2980.25	2913.03	2931.32	2909.84	2947.18	398.661	336.573	374.869	312.203	204.85	154.083	107.683	95.3719
8_+_244654	NM_198625	Mtss1l	2.79625	1.00625	1.12158	1.78846	2.07848	1843.61	1628.47	2028.6	1955.5	1590	4.24107	2.55754	2.09424	2.71186	9.53752	8.39119	3.62489	5.16711
8_-_102103	NM_001286413	Mtus1	1.37131	1.82574	1.32049	1.79411	2.6236	2047.88	2100.83	2149.98	2226.41	2118.57	33.4821	56.5217	32.7225	29.4915	14.8589	25.9348	12.7028	7.47617
5_+_77521	NM_029920	Mtus2	1.4554	0.688668	0.707374	0.577353	0.669204	1868	923	1868	1733	2318	1.11607	3.83632	1.3089	3.05085	1.32215	3.1812	2.89461	2.83629
13_+_382793	NM_001162945	Mtx3	0.43313	0.453094	0.425794	0.733025	0.655978	5071.87	4829.15	4984.04	5140.95	5068.53	6.02679	5.75448	10.9948	11.8644	7.25366	4.99869	5.17304	5.13938
4_+_68350	NM_026689	Mul1	0.780985	3.68179	3.10224	2.46498	0.485477	1082.96	1159.4	1253.04	1627.6	1142.68	4.46429	6.39386	2.6178	6.32768	5.61818	8.5576	5.45407	3.91694
10_+_68114	NM_023431	Mum1	0.0732259	0.0549194	0	0.0681758	0.329517	286.13	268	258.247	262.042	257	9.82143	12.4041	12.5654	10.2825	12.8632	9.21465	11.3913	9.805
X_+_245631	NM_001164633	Mum1l1	1.49282	0.437895	0.461266	0.482972	2.10037	1536.83	1527.59	1540.41	1533.72	1535.43	14.2857	14.3223	13.089	10.3955	7.86914	6.61933	3.59496	1.94352
4_+_68016	NM_026509	Murc	0.0612785	0.249773	0.266634	0.215713	0.0868112	1265.83	1281.63	1212.25	1022.12	1268.83	11.6071	8.82353	15.445	15.4802	3.95431	2.9591	3.89305	4.07929
14_+_66175	NM_181390	Mustn1	0.0641143	0.0285551	0.022273	0.0392084	0.0651295	253.078	272.409	318.973	297.077	326.589	24.5536	19.0537	17.0157	27.2316	15.283	11.1105	15.525	31.4537
17_+_17850	NM_008650	Mut	0.202676	0.210183	0.213058	0.512381	0.839345	1071.03	1105.89	1078.88	1070.6	1091.71	25.6696	28.6445	35.0785	38.0791	9.63835	10.7434	8.51215	7.4079
6_-_17119	NM_010751	Mxd1	0.513062	0.239329	0.203596	0.25542	0.309863	3024.76	2718.29	2372.75	2695.25	2827.18	1.5625	3.58056	3.14136	3.72881	1.48747	2.55407	1.75783	1.90777
13_-_17121	NM_016662	Mxd3	0.0817204	0.127484	0.173055	0.107258	0.122581	302	390.857	417.185	431.583	422.944	7.8125	3.45269	3.14136	2.0339	5.1966	3.40624	4.68579	2.2227
5_-_17122	NM_010753	Mxd4	0.213972	0.163988	0.209151	0.253902	0.376669	2749.18	2662.97	2735.87	2811.76	2774.17	22.5446	46.4194	47.3822	56.2712	43.8004	85.0269	103.467	97.7102
11_-_67622	NM_026280	Mxra7	0.644947	0.337446	0.380094	0.47819	0.535339	805.947	690.712	700.238	567.554	764.255	39.5089	93.9898	67.5393	89.6045	40.2338	95.772	103.723	144.934
7_+_50918	NM_001093766	Myadm	2.68707	0.0597922	0.0953861	0.160518	0.880255	1612.13	1621.09	1617.66	1628.22	1617.54	377.009	246.292	329.581	259.887	418.578	257.847	186.727	185.307
4_+_56309	NM_019660	Mycbp	3.57101	3.41888	1.98407	1.74369	1.15597	503.466	465.409	465.219	503.33	487.449	41.5179	25.0639	29.3194	29.9435	14.6252	10.8453	10.5052	9.95752
15_+_60315	NM_021713	Myg1	0.0235043	0.0988562	0.0709325	0.229167	0.0411325	44.783	15	36.4762	43.7	53.8421	20.3125	18.798	15.7068	15.0282	91.0983	98.1204	127.156	145.026
11_+_77579	NM_175260	Myh10	2.81069	0.192767	0.208303	0.840641	1.16321	1482.74	1487.05	1485.82	1484.9	1484.97	146.429	146.419	135.602	174.915	91.4022	78.4017	61.0925	68.5602
17_-_67938	NM_023402	Myl12b	0.026414	0.00487449	0.00677165	0.00152405	0.106104	323.115	306.624	318.046	315.796	321.775	22.5446	36.1893	48.6911	64.1808	276.217	318.03	396.854	513.069
3_+_80732	NM_001289623	Mynn	0.826683	0.653874	0.82056	0.951938	1.01651	1345.38	1143.05	1255.92	1131.22	1273.64	19.6429	13.1714	12.8272	15.3672	6.18369	6.13478	4.9154	5.92787
1_-_17912	NM_001290982	Myo1b	0.770793	0.524604	0.752841	0.776005	0.788311	762.204	859.95	874.033	979.271	963.99	53.5714	34.7826	37.6963	34.2373	17.7203	13.3347	11.906	7.53074
9_+_71602	NM_181072	Myo1e	0.00889693	0.0152126	0.0214815	0.0183439	0.0264336	1011.48	988.305	1008.3	1008.66	1022.06	39.5089	61.3811	62.3037	55.7062	25.7426	28.8184	23.8486	19.2216
9_+_17918	NM_010864	Myo5a	0.254616	0.653227	0.52961	0.300367	0.172031	2396.97	2795.39	2641.72	2411.09	2705.34	78.5714	94.2455	124.607	120	94.0246	77.6256	41.3972	26.1584
9_+_17920	NM_001039546	Myo6	0.0176638	0.0537489	0.0517442	0.0292709	0.0252502	1752.65	1836.27	1775.09	1764.02	2083.57	8.25893	12.9156	12.5654	15.9322	6.17902	5.76307	6.97845	4.29999
7_-_17921	NM_001256083	Myo7a	0.0418533	0.0128199	0.0606711	0.0225875	0.0878403	804.2	864.25	687.814	630.722	728.423	3.57143	12.4041	14.1361	18.9831	3.13594	6.73306	6.00351	9.69027
9_+_270163	NM_173018	Myo9a	2.53943	0.686013	0.793399	1.54581	1.36029	3076.23	3219.89	3082.38	2841.82	3173.64	26.5625	23.7852	19.8953	21.1299	13.182	10.4509	5.7479	5.38637
19_-_226101	NM_001099634	Myof	0.375617	0.0909613	0.0919158	0.125311	0.766929	442.963	417.503	432.138	441.153	445.738	155.804	146.675	159.424	169.944	89.2668	63.0573	35.4783	24.8862
4_-_320713	NM_177239	Mysm1	Inf	1.3916	Inf	2.20283	2.78962	2807.76	3796.08	3994.93	4047.37	4384.38	15.8482	13.2992	13.6126	8.92655	7.61723	9.7216	7.43043	4.60002
14_-_76789	NM_175245	Mzt1	2.39543	0.91843	0.812985	1.51169	1.30191	1760.63	1771.49	1744.51	1733.67	1764.57	96.875	70.0767	87.1728	88.3616	48.5806	40.2122	44.6103	27.5572
5_-_381695	NM_201369	N4bp2l2	0.197481	0.797669	0.536942	1.02226	0.214906	387.617	782.38	565.165	314.634	455.833	22.3214	26.3427	24.3455	27.1186	17.4025	16.5055	17.66	40.3361
3_+_74838	NM_053089	Naa15	0.121964	0.0894994	0.057503	0.0699667	0.0982194	1759.03	1653.96	1778.85	1761.22	1703.76	61.6071	41.5601	35.8639	28.2486	48.9348	38.686	36.2065	19.8621
14_-_66897	NM_025832	Naa16	0.214955	0.274665	0.644866	0.181518	0.159226	214.898	291.208	395.344	332.966	457.024	11.8304	7.80051	7.59162	4.63277	9.56427	6.21052	4.7595	4.17165
2_+_67877	NM_001141965	Naa20	0	0	0.00917899	0	0.0490037	449.265	441.046	441.099	441.636	444.823	77.2321	51.9182	56.0209	45.8757	51.8096	43.4267	48.7591	45.8227
5_+_231713	NM_172722	Naa25	0.0795044	0.383168	0.285661	0.188078	0.128137	623.963	790.508	878.085	1019.01	675.943	56.25	39.0026	37.9581	27.6836	25.9761	20.6043	10.025	8.88648
14_+_70646	NM_001081430	Naa30	0.876737	0.346504	0.327165	1.46455	1.30302	2504.38	2457.9	2470.65	2462.27	2619.68	34.5982	28.5166	32.4607	28.2486	14.8029	13.2876	11.1729	7.09001
16_+_72117	NM_028108	Naa50	0.542596	0.104836	0.132595	0.247177	0.407662	2629.44	2560.88	2634.58	2596.2	2632.34	191.295	162.916	154.712	101.13	124.352	78.1147	47.4317	28.5652
1_-_17936	NM_008667	Nab1	3.70278	0.628309	1.08156	1.44656	2.3188	1634.25	1643.61	1687.64	1650.38	1646.45	54.0179	77.11	63.089	48.2486	17.155	20.4797	16.6924	12.1499
8_-_66830	NM_025788	Nacc1	2.73299	0.545019	0.643857	1.09919	1.21072	2432.12	2573.9	2344.63	2451.91	2403	12.9464	14.3223	14.6597	12.4294	26.4212	23.1915	22.0239	17.401
2_-_67991	NM_026495	Nacc2	4.17357	1.7689	2.46325	3.2194	2.36798	3862.62	4112.75	4022.27	4025.88	4041.5	24.3304	18.9258	16.7539	25.0847	11.3426	9.54328	8.30334	10.0145
19_+_332397	NM_178421	Nanos1	2.98651	0.273276	0.678515	0.647232	1.24381	2612.66	2429.97	2482.67	2505.25	2490.52	8.03571	3.83632	4.18848	5.19774	3.94611	2.15754	2.37091	1.33866
4_+_94181	NM_053179	Nans	1.0247	1.40438	1.00313	4.62735	0.0906054	401.014	482.351	372.371	400.684	489.175	29.9107	37.2123	29.8429	30.9605	53.1377	61.5735	85.4005	65.595
10_+_53605	NM_001146707	Nap1l1	0.202137	0.0999761	0.103309	0.0955859	0.460086	1083.95	956.61	961.58	971.096	1028.51	537.5	373.529	383.508	263.503	314.019	204.097	223.251	190.878
7_+_108124	NM_025898	Napa	0.0696573	0.069917	0.0787654	0.0639723	0.0755729	994	912.897	1020.93	981.126	936.118	71.2054	111.765	91.0995	88.3616	94.8561	136.962	130.849	127.976
18_+_108123	NM_028017	Napg	1.00886	0.972192	0.960231	1.63667	1.71236	2009.45	1838.41	1965.5	2152.57	2250.99	16.5179	17.3913	21.2042	21.9209	12.9497	13.1955	14.564	10.815
11_+_67608	NM_026272	Narf	0.374302	0.262634	0.336858	0.360191	0.324908	2060.57	2007.67	1755	2351.17	2216.79	2.67857	5.88235	4.71204	9.03955	47.9324	45.6244	32.5925	27.8423
9_+_93697	NM_145618	Narg2	1.44272	0.527149	1.15973	0.922511	2.22574	784.843	833.76	834.684	800.706	778.571	5.58036	4.85934	4.45026	6.32768	5.14756	3.27058	2.73618	2.03267
18_-_70223	NM_027350	Nars	1.08669	0.237469	0.337145	0.486298	0.883134	734.978	737.789	744.927	727.594	730.63	264.509	306.394	260.995	221.356	196.473	244.273	239.677	170.095
4_-_50927	NM_001284229	Nasp	0.131187	0.078712	0.180382	0.0756846	0.0472272	157.35	143.831	136.462	146.176	159.924	92.1875	51.5345	32.7225	26.8927	30.8254	13.9236	15.5264	8.77859
7_+_78286	NM_001111016	Nav2	2.03824	0.647773	0.769147	1.10033	1.92417	3088.16	3146.13	3170.46	3211.85	3157.63	18.9732	7.54476	10.733	8.24859	35.8743	20.004	22.1462	22.294
1_+_269198	NM_173444	Nbeal1	1.28808	0.497458	0.739329	0.989365	6.24493	6511.47	6122.65	6239.38	5471.66	6532.98	17.4107	14.3223	19.3717	21.2429	15.7207	13.205	17.0968	12.4774
12_+_76044	NM_133762	Ncapg2	Inf	0.858992	1.6515	4.40868	Inf	2200.75	2444.44	2471.67	2785.14	2395.55	18.9732	7.41688	11.5183	4.97175	20.9118	7.94784	10.2139	3.52386
16_+_68092	NM_026554	Ncbp2	0.638699	0.248078	0.288312	0.407675	0.350617	741.62	903.298	826.456	862.57	832.198	92.8571	96.4194	82.7225	91.5254	46.211	50.0211	42.4829	50.4327
3_+_320024	NM_178772	Nceh1	1.16522	1.08862	1.05832	0.728805	0.881322	2694.4	3037.73	2768.78	2850.33	2987.61	7.36607	8.56777	9.42408	8.70056	4.94392	5.93589	3.63923	2.44448
1_-_17978	NM_008678	Ncoa2	0.941939	0.512054	0.591597	1.12519	2.5961	2837.55	2894.67	2950.69	2846.71	3271.05	18.0804	12.9156	15.445	12.3164	10.1304	5.6495	1.9355	2.19685
2_+_17979	NM_008679	Ncoa3	0.91757	0.423676	0.682225	0.79014	1.18364	1925.17	1656.57	1731.92	1714.63	1975.03	17.6339	20.0767	13.3508	21.0169	10.8826	7.63572	5.14056	5.41455
1_-_59287	NM_021607	Ncstn	0.0440696	0.00800122	0.0116582	0.00365724	0.0532282	607.217	614.52	613.033	610.36	619.371	16.7411	15.4731	19.6335	18.8701	50.7912	52.967	59.9954	68.0241
9_-_66706	NM_023247	Ndufaf3	0.0755735	0	0.0690335	0.0997151	0.112179	124.543	174.176	156.692	120.6	132.057	3.79464	6.64962	7.8534	11.9774	4.17936	7.39856	9.77408	14.2405
4_+_68493	NM_026742	Ndufaf4	0.108759	0.14015	0.0987549	0.107796	0.130224	1028.2	1048.63	1055.83	956.9	1123.11	58.4821	35.422	31.4136	24.9718	15.7443	11.7706	11.8344	9.9632
3_+_66046	NM_025316	Ndufb5	0.13424	0.122268	0.0808325	0.148468	0.0376053	109.227	109.028	105.012	109.174	112.679	110.045	117.391	94.7644	112.655	36.5486	39.876	60.1346	80.2886
4_-_66147	NM_025383	Necap2	0.471846	0.217385	0.236584	0.283552	0.352542	954.825	982.43	992.853	996.733	974.084	20.7589	37.3402	35.3403	33.6723	22.9777	33.6345	36.6262	37.4248
10_-_17997	NM_008682	Nedd1	4.25484	0.993431	1.97869	2.64796	0.6337	1049.41	1172.19	1141.61	1034.46	1106.01	33.0357	14.578	14.9215	15.5932	17.7743	9.20506	7.67252	5.44652
9_+_17999	NM_010890	Nedd4	2.56219	1.1695	1.23323	2.25554	2.31893	2429.13	2393.95	2402.47	2470.71	2464.07	441.964	450.767	539.005	458.983	369.204	388.149	255.725	206.519
18_+_83814	NM_031881	Nedd4l	0.063843	0.0563869	0.064916	0.0136243	0.246304	362.385	352.926	354.647	344.143	351.651	18.0804	8.69565	10.9948	9.71751	6.85687	4.84399	2.87022	2.17132
13_-_18003	NM_017464	Nedd9	1.37793	2.11429	2.16196	1.41657	1.55551	1542.17	1474.15	1443.25	1534.89	1549.74	43.0804	65.7289	44.7644	61.1299	13.6838	17.6313	7.70484	8.47666
14_+_23955	NM_011849	Nek4	0.496614	0.569209	0.469962	0.398446	0.301853	1321.96	1353.43	1340.29	1362.9	1320.92	3.125	4.34783	5.2356	5.42373	3.4858	2.84183	2.58406	1.93588
2_+_59126	NM_001159631	Nek6	0.521986	0.0521986	0.114642	0.069962	0.796154	1154.53	1161.95	1154.23	1165.46	1153.14	28.125	32.8645	45.8115	53.2203	16.3147	18.1779	25.0863	24.5677
1_-_59125	NM_021605	Nek7	2.62085	0.640635	0.718538	1.13719	2.28372	2638.37	2393.88	2467.88	2556.49	2541.35	57.8125	48.5934	56.0209	51.4124	94.9688	86.1831	70.9602	70.8036
12_-_66244	NM_025441	Nemf	0.214737	0.2	0.383871	0.175258	0.396667	442.348	443.42	442.761	445.609	443.925	40.4018	33.1202	36.1257	31.7514	14.8674	13.1034	12.6398	9.30147
9_-_18007	NM_001042752	Neo1	0.276399	0.282132	0.441081	0.400779	0.433275	1581.5	1557.17	1469.83	1476.93	1705	15.625	15.601	14.9215	14.8023	32.03	20.3322	8.24893	7.66829
8_-_74513	NM_001081324	Neto2	0.927032	0.295504	0.443394	0.965864	1.78675	2790.56	2633.59	3003.55	2981.98	2864.29	7.14286	4.85934	11.5183	9.03955	9.29806	5.29273	9.53175	4.19662
3_-_68810	NM_199465	Nexn	0.316592	0.310533	0.0515091	0.0803484	0.701982	529.745	541.231	540.889	545.94	537.529	66.7411	51.7903	43.7173	44.6328	34.7538	32.3186	38.4443	31.4128
11_+_18015	NM_010897	Nf1	1.97281	0.651499	0.821258	1.841	2.13737	1700.21	1764.48	1830.62	1856.5	1837.99	4.6875	11.1253	13.089	8.92655	22.9004	16.6252	10.5213	6.94235
7_-_18020	NM_010900	Nfatc2ip	5.43673	0.0956462	0.616704	1.29122	0.860816	2044.29	2101.27	2078.75	2071.86	2103.84	3.34821	2.55754	3.66492	2.82486	3.38234	2.13316	2.3327	1.41458
4_+_18027	NM_001122953	Nfia	0.14903	0.311307	0.222004	0.197978	0.268476	4786.83	4211.4	4030.4	3955.54	4907.6	16.7411	23.7852	21.9895	29.9435	6.52739	9.96999	6.86418	20.8092
19_+_18034	NM_019408	Nfkb2	0.0348112	0.128553	0.120759	0.113042	0.0417887	676.931	671.437	628.704	897.8	759.152	19.4196	20.7161	18.3246	19.322	12.6604	11.3763	11.2811	10.8204
2_-_18041	NM_010911	Nfs1	0.446864	0.375439	0.728693	1.00768	3.43527	596.222	597.598	599.461	603.744	598.056	28.3482	22.7621	22.5131	26.2147	71.0625	57.9618	52.6275	47.5505
5_-_100978	NM_133921	Nfxl1	4.38557	0.396884	0.304494	0.386962	1.85742	821.655	816.311	817.118	835.712	819.8	13.6161	19.5652	20.9424	12.4294	12.5025	15.0782	10.0401	7.23532
17_-_18044	NM_010913	Nfya	4.8932	1.72405	1.68609	3.28964	7.03618	2137.3	1563.09	1655.52	1413.77	2105.09	5.13393	2.94118	3.40314	2.48588	21.3385	9.27372	7.37381	6.81188
10_-_18045	NM_010914	Nfyb	1.01134	0.382062	0.462327	0.669324	0.846414	835.276	856.699	1026.19	903.488	1100.77	32.5893	22.6343	21.9895	25.9887	14.4432	7.71016	11.1203	11.9775
19_+_66866	NM_025811	Nhlrc2	0.076722	0.283418	0.211481	0.623076	0.174627	2063.81	1864.19	3059.5	2953.65	3024.22	21.875	16.8798	21.7277	18.7571	14.6273	10.9666	8.50709	6.45492
3_-_212114	NM_172501	Nhlrc3	1.40891	0.143313	0.268733	0.570563	0.863941	3558.69	3661.65	3573.43	3490.75	3621.54	9.59821	16.624	19.1099	19.096	4.33311	5.81795	4.05536	5.04047
15_-_20826	NM_011482	Nhp2l1	1.14554	0.38475	0.521949	0.713806	0.726727	619.109	597.553	565.292	580.25	632.559	228.795	154.092	145.812	136.158	142.383	99.6044	73.3037	64.8031
14_+_18074	NM_008695	Nid2	7.02427	6.14683	7.41155	4.55573	2.86274	571.58	568.619	573.775	567.159	565.31	32.8125	24.4246	36.1257	44.8588	19.2882	11.8263	10.2676	12.5171
1_+_65102	NM_022988	Nif3l1	0.254476	0.828525	0.621394	0.73502	0.390968	443.173	379.205	353.395	409.927	436.689	37.0536	34.6547	28.7958	33.1073	15.3564	13.234	11.4855	9.94323
7_-_233280	NM_153578	Nipa1	0.123136	0.38981	0.314793	0.397276	0.394985	1796.26	1450.58	1747.75	1798.48	2030.65	31.4732	20.9719	29.3194	27.2316	3.60059	2.79231	3.35431	3.17647
7_-_93790	NM_001256133	Nipa2	1.96645	12.8388	15.5203	3.88234	4.29043	976	925.822	945.075	985.747	1033.68	47.7679	49.3606	38.2199	30.3955	32.7165	31.8025	23.6419	20.1181
4_+_66536	NM_025623	Nipsnap3b	0.15581	0.0359281	0.0489687	0.085163	0.208174	670.141	664.189	671.571	671.609	686.115	49.5536	37.5959	48.1675	38.3051	46.5982	42.8589	50.1961	38.9704
1_-_27045	NM_001242580	Nit1	0.0889958	0.367849	0.597543	1.13915	0.157295	347.358	506	473	363.767	418.822	16.9643	19.4373	22.5131	24.1808	15.6907	16.5217	16.9759	21.7276
16_-_52633	NM_023175	Nit2	0.741592	0.96861	0.423767	0.423767	0.206157	213.371	252.871	227.045	236.729	217.303	20.7589	17.0077	15.445	20.113	11.8172	9.77936	8.47508	11.635
4_+_67149	NM_025998	Nkain1	3.92397	1.79644	1.81763	3.11258	3.2069	1242.09	1346.92	1414.96	1435.47	1354.94	21.875	18.4143	20.9424	15.9322	22.4507	25.122	32.4223	25.6035
X_+_67050	NM_025937	Nkap	0.504233	0.453688	0.484689	0.320644	0.70187	2285.02	1862.23	2147.2	2097.02	2298.33	15.8482	16.3683	12.5654	18.8701	7.84178	5.55372	5.04518	4.49456
X_-_77286	NM_029891	Nkrf	0.16593	0.150313	0.182523	0.213894	0.228153	1148.88	1159.48	1121.3	1138.27	1211.55	11.6071	11.509	6.80628	6.21469	7.75008	7.07752	3.87241	2.59491
9_+_18087	NM_010918	Nktr	10.6104	12.3215	21.8517	8.12986	2.20811	1966.33	2119.32	2075.5	2180.38	2207.39	44.8661	53.8363	66.4921	47.3446	22.4156	20.8126	20.5461	15.0975
11_-_18099	NM_008702	Nlk	2.42694	1.6747	1.64967	1.35744	1.86316	1729.74	1726.9	1729.24	1722.41	1721.49	29.0179	18.4143	15.445	16.6102	5.97346	5.71375	4.28746	3.19315
13_-_75805	NM_029447	Nln	0.217024	0.296822	0.263946	0.29164	0.506848	1051.28	842.548	1040.79	1102.3	1095.23	28.125	26.7263	28.0105	19.887	15.2758	14.2111	12.6965	10.5427
11_-_18102	NM_008704	Nme1	0.133198	0.23313	0.224672	0.199414	0.0779623	194.546	196.487	190.648	190.948	185.187	414.062	418.926	335.34	299.209	361.917	442.243	573.283	1996.54
4_-_66454	NM_133435	Nmnat1	0.341709	0.765427	1.11625	1.11625	0.558124	874.868	805.185	746.714	401.6	760.392	6.02679	3.58056	2.6178	5.76271	5.08059	5.31458	4.50236	8.57787
11_+_18107	NM_008707	Nmt1	0.050658	0.168067	0.194912	0.121221	0.153353	883.099	643.504	933.832	818.779	840.129	77.4554	79.2839	74.6073	62.9379	33.9089	42.4556	41.4486	35.9484
2_+_18108	NM_008708	Nmt2	1.06505	1.77047	1.7428	7.80112	0.69764	1246.7	1311.23	1277.97	1596.28	1351.62	39.5089	28.6445	30.3665	24.1808	23.739	17.5255	21.6331	12.3146
5_-_56412	NM_019836	Noa1	0.0969364	0.145405	0	0.178451	0.514109	116.358	127.387	132.393	131.465	124.777	20.7589	17.9028	18.5864	16.7232	12.5616	14.2241	15.5462	9.94642
19_-_57753	NM_021315	Noc3l	1.6366	0.374145	0.514449	0.911283	1.02487	1186.51	1103.64	1282.13	1282.13	1243.89	10.0446	5.75448	7.8534	3.9548	7.61582	7.46372	6.11157	6.71578
11_-_68979	NM_001161329	Nol11	0.399538	0.212869	0.214972	0.158634	0.421768	692.538	637.386	664.637	656.25	673.598	42.1875	36.9565	31.4136	29.2655	16.4278	13.3373	14.1955	8.50475
19_+_70769	NM_053086	Nolc1	0.230963	0.384048	0.424639	0.298869	0.352685	529.929	456.444	555.127	549.13	593.728	115.625	87.468	72.5131	53.2203	48.778	33.7478	26.5792	15.9713
5_+_433864	NM_001033457	Nom1	0.836601	0.155894	0.329749	0.257703	1.01471	351.891	398.182	379.144	348.358	372.783	22.0982	20.4604	17.5393	15.5932	8.39193	8.47797	5.44445	4.49377
13_-_28126	NM_178605	Nop16	0.125996	0.0745506	0.0405854	0.0670955	0.594998	463.765	459.965	462.022	459.68	460.051	25.2232	23.4015	25.3927	15.3672	26.0316	14.5896	22.1303	14.95
7_+_66394	NM_001163684	Nosip	6.53097	1.76256	2.29836	Inf	0.693389	461.297	522.625	433.489	512.235	488.582	14.2857	16.7519	22.2513	22.1469	17.7189	25.5741	23.836	33.2048
3_+_18129	NM_010928	Notch2	0.493599	0.0946628	0.0556911	0.258058	1.16021	2885.19	2886.12	2885.64	2888.72	2888.81	42.4107	51.9182	66.2304	60.226	27.9813	30.7305	26.3438	18.1895
15_+_18133	NM_010930	Nov	6.87031	0.829876	2.40054	1.89346	3.0632	1092.61	1152.03	1125	1186.11	1128.14	24.3304	21.0997	18.3246	49.3785	6.41424	6.96298	6.38366	15.4865
7_+_50490	NM_001285835	Nox4	1.65754	8.18078	3.14398	2.1655	3.2683	1336.54	1316.56	1263.04	1407.98	1376.05	7.58929	12.7877	11.2565	15.0282	6.80694	11.89	6.36225	5.88359
9_+_244879	NM_001081152	Npat	0.20169	0.159415	0.199237	0.177759	0.351943	1347.64	1358.6	1329.71	1353.63	1317.37	20.9821	15.4731	16.4921	16.3842	13.4785	7.89087	5.45292	2.91273
18_-_18145	NM_008720	Npc1	3.37929	2.25767	1.52768	2.3483	2.21784	1095.76	1076.44	1100.34	1226	1165.47	17.1875	17.5192	14.6597	18.0791	15.8036	12.9711	7.95782	8.37641
12_-_67963	NM_023409	Npc2	0.0155376	0.0214669	0.0275446	0.0267695	0.0253445	770.058	721.794	761.26	758.675	780.737	133.036	211.893	173.298	205.537	93.0859	142.304	141.809	147.215
11_-_217365	NM_001195023	Nploc4	1.46258	0.386048	0.434506	0.672132	0.930096	2000.89	1930.39	1913.25	1987.87	1982.76	31.9196	34.6547	30.8901	29.6045	47.1912	42.9812	35.7307	26.8772
15_-_18162	NM_008728	Npr3	2.04348	0.550725	0.89441	0.658385	1.45963	1913.65	2165.72	2428.3	2231.97	2284.26	6.47321	20.2046	17.5393	17.9661	2.60579	8.45064	4.26367	3.71468
8_-_18104	NM_008706	Nqo1	2.9947	0.852498	0.901646	2.06572	0.972527	573.267	574	578.2	572.902	572.689	74.1071	12.7877	21.466	23.2768	82.669	18.131	29.8952	26.5342
13_+_18105	NM_020282	Nqo2	0.0650525	0.174459	0.240212	0.17053	0.261979	642.025	353.776	690.291	646.955	819.282	16.9643	23.2737	34.555	26.8927	7.97482	8.81708	12.679	7.34672
11_-_217166	NM_145434	Nr1d1	0.431922	0.299118	0.164212	0.374458	0.440889	233.031	227.803	233.289	217.735	232.44	13.6161	9.71867	8.90052	15.9322	12.0655	11.6121	10.9078	11.4859
14_-_353187	NM_011584	Nr1d2	1.63068	0.325025	0.428578	1.21957	2.02974	2579.01	2587.28	2561.97	2575.09	2580.17	37.2768	26.087	39.5288	46.5537	23.7888	17.1959	14.369	14.2729
10_+_22025	NM_011629	Nr2c1	0.162319	0.144427	0.185668	0.268051	0.476596	1123.42	1111.92	1134.92	1413.84	1394.54	11.8304	18.2864	15.1832	17.7401	6.36053	7.06116	5.2744	4.17999
7_-_11819	NM_183261	Nr2f2	0.111035	0.207091	0.15639	0.140196	0.137454	1375.3	1348.68	1329.97	1323.25	1321.57	77.2321	73.0179	82.9843	83.8418	34.5493	32.9757	27.9142	24.8564
18_-_14815	NM_008173	Nr3c1	5.37586	0.962961	1.18506	2.47367	3.41178	3538.37	3561.54	3462.87	3606.38	3592.28	45.0893	32.0972	34.2932	46.4407	20.5943	14.3465	15.5506	18.2719
15_-_223649	NM_144847	Nrbp2	0	0	0	0	0.336046	1488.02	1493.67	1483.45	1490.74	1491.95	4.01786	7.92839	10.2094	12.5424	3.41885	6.39983	7.18533	8.99821
8_-_211323	NM_178591	Nrg1	0.122944	0.925695	0.916052	0.723199	0.269994	1382.89	1019.56	1451.63	843.229	959.614	12.7232	9.71867	9.1623	6.44068	6.50673	6.84578	3.31294	2.21111
16_-_268903	NM_173440	Nrip1	1.76681	0.235374	0.508408	0.991867	0.815571	3522.42	3525.72	3538.14	3599.53	3546.96	16.9643	11.6368	15.7068	15.2542	8.67938	4.47131	5.68567	4.03842
13_-_59050	NM_021552	Nsa2	0.0129624	0.0243396	0.0253386	0.0378374	0.0391877	403.151	348.59	372.679	484.353	419.514	177.009	192.583	174.084	185.65	53.7968	64.1303	65.1922	52.5662
13_+_18193	NM_008739	Nsd1	0.508798	1.81702	1.7947	1.45112	2.38124	3117.26	3001.55	3139.1	2699.6	3093.17	38.6161	27.2379	26.178	34.3503	17.8146	10.1751	5.44335	6.09145
11_-_18195	NM_008740	Nsf	1.51417	0.384663	0.469861	0.511509	0.801176	1393.23	1408.9	1407.79	1445.8	1410.48	39.7321	24.4246	28.534	27.1186	33.9232	23.508	23.6969	22.3851
5_-_18196	NM_010942	Nsg1	1.38421	1.22214	1.24245	1.57695	1.15962	944.577	879.856	937.83	928.46	1013.18	27.9018	21.867	32.9843	31.0734	26.9578	18.5538	27.9418	17.9933
16_-_106338	NM_178925	Nsun3	0.550522	0.165725	0.178234	0.214596	0.740358	2267.8	2236.58	2214.22	2345.18	2369.82	7.36607	6.52174	8.63874	13.4463	4.4537	4.30454	2.81412	2.36654
4_-_72181	NM_028142	Nsun4	1.28707	2.42302	1.39238	1.3354	1.33778	815.927	947	714.36	689.536	840.543	6.02679	10.9974	7.32984	7.9096	4.69711	6.66543	5.43054	4.44092
6_-_107569	NM_001252374	Nt5c3	0.278724	0.127103	0.115125	0.0864096	0.424638	474.877	448.468	464.057	436.412	458.169	24.3304	20.0767	26.7016	16.0452	10.7886	10.0001	11.1468	10.2425
8_+_66566	NM_025636	Ntpcr	0.452771	0.369763	0.31694	0.394956	2.78763	432.204	421.75	441.7	406.553	429.301	9.82143	6.39386	9.94764	16.4972	7.27577	8.09885	13.2494	16.8697
10_-_77976	NM_001004363	Nuak1	1.0054	0.102733	0.104516	0.2762	2.36765	3276.31	3285.8	3273.24	3277.89	3274.53	99.3304	80.179	77.4869	70.3955	36.8572	24.1751	15.3673	27.6153
5_+_53312	NM_016736	Nub1	11.3506	13.5017	8.2658	Inf	0.649618	765.762	745.125	679.321	663.488	758.606	17.8571	39.3862	31.6754	41.9209	11.6632	20.4708	18.6213	16.9852
16_+_26425	NM_011955	Nubp1	0.396923	0.673567	0.660871	0.727317	0.359519	431.582	444.543	385.875	382.022	395.909	30.8036	34.6547	35.6021	32.4294	9.82865	9.66942	11.7817	7.37663
7_-_18220	NM_001163662	Nucb1	0.454079	0.210199	0.229587	0.232919	0.318156	845.033	825.141	832.669	845.352	836.526	37.9464	48.7212	52.0942	60.113	116.252	152.941	145.2	146.497
1_+_98415	NM_001145804	Nucks1	1.48862	9.96092	4.63364	2.95987	0.597576	3607.06	3780.82	3752.79	3747.54	3918.38	153.795	117.391	124.869	92.0904	85.5264	58.7126	72.7507	66.1831
15_-_67429	NM_026149	Nudcd1	2.20734	2.19608	2.8502	2.22556	4.42885	817.789	860.018	781.11	903.971	794.943	24.5536	19.821	18.3246	17.7401	20.3202	15.2977	12.4105	10.2264
11_+_52653	NM_001290697	Nudcd2	7.91772	1.79889	2.29177	4.54512	4.80753	739.652	738.248	746.826	764.293	759.024	89.0625	91.8159	98.4293	70.1695	39.2913	46.6704	70.3613	52.4869
5_+_17766	NM_008637	Nudt1	1.26382	0.379147	0.909953	0.421274	0.758294	304.071	252.483	291.526	284.8	313.2	6.47321	4.85934	5.2356	5.08475	7.77311	5.19706	6.21068	5.41612
12_-_66174	NM_025399	Nudt14	0.00769988	0	0	0	0.00665583	111.358	183.238	103.5	99.0476	115.277	4.6875	6.64962	5.49738	9.37853	5.36006	5.21796	9.59437	23.087
7_-_110959	NM_033080	Nudt19	0.380639	0.507772	0.331604	0.356791	0.314043	436.472	453.483	423.94	483.02	421.389	32.8125	29.9233	26.178	31.0734	31.4487	29.5969	25.427	25.7747
8_-_68219	NM_026623	Nudt21	0.0239124	0.032679	0.0512366	0.0373406	0.0781889	715.332	718.295	488.179	458.486	761.419	70.3125	57.9284	45.8115	50.1695	114.062	88.2214	117.76	118.149
2_+_53893	NM_016918	Nudt5	0.984937	0.260725	0.442747	0.392433	0.477029	956.355	666.925	761.056	828.288	828.451	53.7946	48.0818	41.8848	42.8249	10.0288	8.43134	10.492	7.27816
11_+_68564	NM_001024205	Nufip2	0.645619	0.22812	0.176999	0.323228	0.378645	6183.11	5299.11	5451.79	5861.8	5806.38	65.4018	43.2225	45.288	44.0678	38.4425	33.6116	36.0594	82.9918
10_-_103468	NM_134010	Nup107	0.142336	0.455474	0.168694	0.421736	0.332117	214.441	216.615	222.556	223.621	212.903	23.2143	13.8107	15.1832	8.13559	22.3794	13.8752	12.5223	7.45053
13_-_218210	NM_175749	Nup153	0.838594	0.277702	0.346901	0.460919	0.479528	1092.81	1086.04	1082.82	1077.32	1095.24	85.2679	49.6164	49.7382	44.5198	42.9088	27.296	17.7496	19.0795
15_+_170762	NM_133227	Nup155	3.87653	3.54825	0.883071	2.79739	1.15667	1034.89	1048.55	1080.9	1015.62	1152.58	34.5982	15.7289	15.9686	14.6893	23.2531	9.39144	5.63384	4.73783
2_+_59015	NM_021512	Nup160	0.124627	0.10461	0.130203	0.134518	0.144498	1055.76	1136.04	973.843	1139.67	1115.74	31.25	15.4731	14.9215	11.1864	23.4268	9.81937	6.16257	2.64505
2_+_69482	NM_001190179	Nup35	0.159366	0.0389984	0.136494	0.0935961	0.786207	498.816	507.675	508.309	504.204	506.389	54.9107	24.4246	25.6545	21.4689	34.233	19.7448	18.2591	20.02
15_+_18141	NM_016714	Nup50	0.108968	0.20685	0.191385	0.199774	0.207817	1331.01	1396.58	1212.93	1282.73	1577.17	60.9375	54.7315	49.2147	41.3559	30.7272	25.8108	24.0374	18.9766
5_-_269113	NM_183392	Nup54	0.616719	0.0675167	0.0819845	0.088291	0.736849	636.297	652.859	642.133	640.792	636.297	20.5357	9.59079	13.8743	8.36158	19.2297	13.8719	12.993	9.89093
5_+_231042	NM_153092	Nupl2	0.0291005	0.219371	0.281385	0.139881	0.408805	581.804	652.105	547.25	578.594	781.435	8.48214	5.6266	8.37696	7.79661	7.66558	6.33232	5.82955	5.34281
10_+_52014	NM_030250	Nus1	1.1793	0.377286	0.556151	0.61986	0.78621	1489.83	1463.2	1565.93	1550.31	1570.16	212.277	165.09	173.822	147.684	65.8523	61.1548	49.0066	32.7752
2_+_108907	NM_133851	Nusap1	3.68485	7.5171	6.60326	2.61625	2.60396	787	616.494	643.072	606.541	679.882	19.8661	12.4041	9.68586	5.76271	10.6358	5.7501	6.56857	2.86779
1_-_67459	NM_026171	Nvl	0.229741	0.533954	0.399881	0.283468	0.264953	1627.02	1062.78	1195.17	1028.33	1391.7	19.6429	18.5422	15.7068	18.3051	26.1314	21.208	14.3803	9.9872
11_-_18230	NM_008750	Nxn	0.265507	0.411609	0.326667	0.374899	0.350363	701.227	722.773	670.205	688.864	677.351	112.054	123.018	162.042	194.802	64.9388	61.199	92.0891	103.492
7_-_18242	NM_016978	Oat	0.414069	0.190293	0.283503	0.324369	1.05497	624.84	626.098	633.088	636.993	637.655	226.116	235.166	220.942	232.203	103.881	100.475	120.065	122.387
5_-_433904	NM_026950	Ociad2	3.80508	1.5628	Inf	2.3442	1.29101	772.12	482.147	521.375	562.6	666.683	7.58929	9.20716	19.6335	21.3559	2.15939	2.84281	6.79278	13.6969
12_+_18263	NM_013614	Odc1	0.26063	0.137613	0.189669	0.243329	0.0519797	371.463	374.184	369.674	370.117	363.63	203.795	153.581	128.01	105.424	169.19	124.323	97.6908	92.8735
8_+_270086	NM_001093757	Ogfod1	0.786921	0.778875	0.544569	0.814228	1.04762	2706.13	2764	2782.22	2792	2853.45	13.3929	16.1125	12.3037	12.7684	14.5908	11.395	4.83671	5.12254
5_+_66627	NM_025671	Ogfod2	0.141326	0.0641026	0.163399	0.163399	0.222222	371.085	394.333	365.789	458.143	370.159	6.69643	9.07928	7.32984	12.0904	4.43052	4.82312	6.44308	11.2989
1_-_70155	NM_001081079	Ogfrl1	0.674655	5.36756	7.36724	1.94706	1.72403	1803.67	1569.87	1047.85	1851.89	1801.57	13.8393	7.80051	9.94764	9.83051	3.7983	2.57321	3.4369	3.91616
13_+_18295	NM_008760	Ogn	0.332498	0.135468	0.0756508	0.0729442	0.424864	1479.29	1468.41	1467.63	1463.89	1480.27	19.1964	20.3325	44.5026	106.78	15.3819	17.7301	32.2721	47.1974
X_+_108155	NM_001290535	Ogt	1.61717	0.190208	0.399148	0.27877	1.64847	2015.28	2011.83	2012.97	2013.6	2013.35	25.2232	27.4936	31.4136	31.2994	43.8395	33.8719	37.3996	28.0921
5_+_109305	NM_175423	Orai1	1.0698	0.381289	0.355756	0.334951	1.07476	471.253	466.083	467.804	467.387	458.615	5.35714	7.16113	8.11518	7.34463	12.1452	10.4784	15.2565	13.7426
5_-_269717	NM_178751	Orai2	26.1328	15.9904	16.4654	15.9252	16.1022	2842.47	2879.44	2760.82	2789.73	2775.29	12.0536	9.84655	7.8534	9.37853	1.43687	1.37759	1.71921	2.02623
7_+_72284	NM_028184	Oraov1	0.790426	0.434353	0.39402	0.879342	0.303357	1233.19	1118.71	1207.89	1107.5	1171.69	13.8393	11.509	12.5654	17.7401	6.20918	7.22882	8.07407	7.44143
1_-_18393	NM_001025378	Orc2	0.358552	0.279285	0.48314	0.287879	0.193077	749.956	683.089	669.145	630.373	706.291	39.9554	26.4706	17.5393	17.8531	19.2465	12.0708	8.21251	5.58607
4_-_50793	NM_001159563	Orc3	1.3587	5.09512	2.95369	1.52607	0.345893	158.95	161.552	201.371	147.572	173.995	44.8661	36.5729	37.9581	47.5706	29.2456	21.8904	18.2265	16.8697
10_-_66844	NM_024180	Ormdl2	0.541259	0.304604	0.534678	0.793575	1.23085	407.215	412.429	412.587	410.786	414.739	29.6875	35.9335	29.3194	23.3898	12.503	13.4661	15.0144	12.9786
10_-_216440	NM_001171026	Os9	0.0442444	0.0912902	0.0836922	0.0653829	0.0575745	1044.47	768.125	873.592	891.786	982.8	19.6429	22.2506	18.3246	28.2486	12.3169	15.3064	17.4052	24.9448
19_+_76303	NM_001033174	Osbp	0.0806315	0	0.0263022	0.11333	0.316643	2058.54	2059.38	2057.61	2063.6	2053.62	17.8571	16.8798	23.0366	24.1808	29.4067	30.4127	34.1893	25.6867
9_+_74486	NM_148958	Osbpl10	0.689546	2.2021	0.967588	Inf	0.800763	567.048	895.368	650.222	966.286	895.368	4.24107	3.45269	1.83246	2.14689	1.48794	1.17115	1.19107	1.08955
16_+_106326	NM_176840	Osbpl11	0.210676	0.0615823	0.117931	0.0307003	1.45103	1502.47	1498.53	1485.91	1503.03	1496.3	20.0893	20.5882	18.5864	19.774	16.2895	13.4696	10.5739	7.79356
2_+_228983	NM_144500	Osbpl2	0.250729	0.0616465	0.0886669	0.117925	0.369212	1064.1	1064.51	1050.55	1075.81	1058.81	30.3571	39.1304	26.4398	42.3729	15.0088	15.7595	14.5775	12.7586
6_-_71720	NM_001163645	Osbpl3	0.00757181	0.100341	0.120963	0.0693264	0.0583157	785.51	470.83	896.957	481.895	897.929	23.6607	8.82353	19.8953	12.7684	9.22931	5.48045	7.66451	7.70006
10_+_237542	NM_001003717	Osbpl8	Inf	0.924134	0.633015	0.858124	0.322939	3590.89	3574.78	3514.78	3595.61	3820.26	31.9196	26.8542	34.2932	32.6554	10.4969	9.71695	9.2499	4.50341
4_-_100273	NM_001134791	Osbpl9	0.408053	0.232236	0.252445	0.222565	0.306206	502.88	449.349	448.312	497.545	491.429	42.1875	49.1049	63.3508	63.2768	46.2339	49.7822	56.7671	59.9714
4_-_209212	NM_145950	Osgin2	Inf	0.447025	Inf	0.243832	0.308853	540.353	646.54	632.76	601.147	637.736	11.1607	6.39386	8.90052	8.13559	5.33228	2.37979	2.7795	2.72566
12_+_23967	NM_011859	Osr1	8.76761	0.978873	0.974178	5.28169	9.48944	752.857	723.244	794.274	840.08	794.994	10.0446	14.9616	13.089	18.1921	14.0158	21.0387	17.3566	36.2613
3_-_66357	NM_025509	Ostc	0.110317	0.0678784	0.0746912	0.0525652	0.215786	519.9	500.914	502.722	503.601	508.498	218.75	250.128	271.204	302.26	134.122	160.712	219.506	215.06
19_-_20409	NM_017375	Ostf1	0.122748	0.0270177	0.0413235	0.0482246	0.324956	381.101	398.492	386.484	398.861	399.428	121.205	116.624	148.691	155.48	38.0959	41.9503	43.9413	36.5172
19_-_107260	NM_134150	Otub1	1.72455	0.778517	0.724766	2.08292	2.42412	763.252	730.679	757.362	697.128	744.072	41.7411	45.2685	32.7225	36.2712	93.415	89.7562	138.511	135.379
2_+_71198	NM_027715	Otud1	0.341384	0.0978524	0.0761483	0.233204	0.131285	1256.85	1271	1338.85	1230.24	1300.67	6.69643	6.77749	9.68586	4.85876	2.48161	4.31419	6.04842	3.54504
4_-_73162	NM_028453	Otud3	0.105295	0.264242	0.248563	0.120384	0.368455	2251.86	1995.46	3007.61	3034.52	3275.32	11.1607	10.6138	7.59162	11.5254	5.30415	4.79486	6.86334	5.9293
8_+_73945	NM_001256033	Otud4	4.87563	0.427174	0.530182	0.335894	2.49341	3719.06	3719.13	3709.09	3711.37	3716.79	103.571	73.0179	75.1309	42.1469	48.5292	32.3889	28.2471	11.8551
X_+_54644	NM_001290537	Otud5	0.130846	0.0698127	0.0912191	0.103147	0.117397	774.297	965.99	852.914	918.885	921.557	22.9911	29.7954	22.7749	27.7966	23.4037	23.3823	19.1154	17.7095
4_-_72201	NM_152812	Otud6b	0.521862	0.0410292	0.0715753	0.096346	0.178402	1877.31	1870.94	1828.94	1863.83	1856.32	75.2232	56.266	56.0209	43.0508	87.2409	67.8968	55.4316	30.8562
3_+_229603	NM_001025614	Otud7b	1.40396	1.24398	1.32135	1.24002	0.931456	3570.91	3205.78	3095.77	2707.37	3268.38	34.1518	28.0051	27.4869	25.8757	17.7534	15.658	7.68573	6.71037
14_+_69089	NM_026936	Oxa1l	0.0229506	0.039729	0.0389707	0.0178156	0.0355838	562.215	399.091	632.344	543.077	689.365	27.0089	20.844	17.0157	21.6949	17.977	17.568	14.7627	13.9213
15_+_67041	NM_024188	Oxct1	2.08377	1.71382	1.84574	2.32959	1.92599	1433.08	1379.64	1380.29	1404.29	1474.31	97.7679	133.887	94.7644	85.9887	89.1325	108.028	72.2099	50.0949
14_+_218885	NM_145460	Oxnad1	0.275472	0.28348	0.225734	0.213854	1.14055	732.989	742.708	743.455	747.5	728.07	14.5089	8.4399	8.90052	8.0226	8.66449	6.91919	7.64541	5.1706
15_+_170719	NM_130885	Oxr1	1.65138	0.411209	0.616981	0.808247	1.31738	1612.81	1565.4	1593.09	1653.8	1653.36	77.9018	119.693	137.173	164.859	46.4424	64.5486	47.2022	43.8725
10_+_18451	NM_011030	P4ha1	0.0296225	0.0172007	0.0155794	0.0254885	0.0478661	1212.88	1379.96	1428.04	1321.86	1391.86	16.2946	26.3427	41.8848	51.1864	59.5641	92.4892	123.246	102.78
5_+_66768	NM_025755	Pacrgl	3.46939	1.15646	1.03896	1.58163	1.41497	597.411	603.514	539.973	609.571	555.597	8.25893	9.46292	10.9948	7.00565	5.34902	4.61755	5.82411	6.04874
12_+_217893	NM_001081170	Pacs2	0.226213	0.177611	0.164167	0.205666	0.290754	1277.76	1110.51	1292.41	1418.12	1487.5	30.3571	38.6189	26.9634	25.8757	22.1945	22.0343	12.8598	12.4731
9_-_18475	NM_008775	Pafah1b2	0.390457	0.612831	0.641775	0.730688	0.51733	2094.76	2087.07	2179.46	2109.13	2187.9	195.536	191.816	172.513	162.26	84.8749	78.979	64.9975	54.6935
13_+_218693	NM_145457	Paip1	0.204156	0.304303	0.226823	0.335569	0.42466	378.554	327.978	339.355	337.406	350.07	223.214	126.982	194.503	126.78	48.8789	53.2994	53.4683	58.2386
18_+_67869	NM_026420	Paip2	0.451051	0.334243	0.310136	0.213492	0.247992	486.372	559.716	557.27	570.441	502.005	113.17	140.409	151.309	157.514	54.5377	71.0512	102.706	101.643
7_+_18479	NM_011035	Pak1	0.620583	0.572896	0.476868	0.73065	0.478141	848.016	764.297	728.819	767.174	851.357	24.7768	29.0281	39.0052	36.7232	17.1533	19.5134	28.2281	21.1368
16_-_224105	NM_177326	Pak2	0.960183	0.378248	0.409655	0.538122	0.530949	2650.64	2873.8	2793.02	2819.63	2788.32	65.4018	46.4194	50.5236	37.7401	38.2262	28.5216	23.0568	15.3677
X_+_18481	NM_008778	Pak3	0.293992	0.903431	0.819106	0.54702	0.418065	6195.01	6108.13	6396.26	5907.14	6352.68	8.48214	8.31202	19.1099	18.0791	7.79711	8.46122	12.2214	11.7309
4_+_242481	NM_172868	Palm2	1.71492	0.717655	0.731926	2.5066	2.97252	6911.29	6267.43	6329.53	6238.24	6283.64	3.125	6.01023	6.5445	5.08475	147.091	108.529	78.8991	51.7158
13_-_100715	NM_133905	Papd4	0.283467	0.262851	0.183333	0.386849	0.130361	592.426	624.109	661.909	647.109	661.078	73.4375	82.6087	79.3194	67.0056	48.4372	57.2769	50.3894	38.1824
13_-_210106	NM_001169131	Papd7	0.414877	0.172685	0.297142	0	6.34284	1951.62	1950.92	1951.09	1950.18	1952.12	33.4821	22.1228	20.1571	15.1412	17.4496	16.734	9.12946	6.08241
4_+_18491	NM_021362	Pappa	4.33212	0.260092	0.458114	1.34061	3.64676	5808.08	5909.65	5987.37	5957.46	6041.85	50.8929	66.7519	75.1309	53.1073	20.3836	31.3734	26.9644	17.7641
19_+_23972	NM_011864	Papss2	2.21782	5.51899	13.0118	9.37922	8.74607	1541.15	1485.43	1495.76	1480.98	1494.9	44.6429	30.8184	33.7696	39.209	20.0231	13.7403	16.3266	12.8469
17_-_76498	NM_023824	Paqr4	0.151702	0.0554042	0.0419176	0.0861011	0.329559	1078.62	1127	978.25	1022	1011.06	6.69643	8.69565	4.71204	5.42373	3.8985	3.1326	2.51386	2.2577
1_+_74229	NM_028829	Paqr8	1.43543	0.552612	0.722846	1.27138	1.1836	3294.23	3339.07	3100.27	2505.29	3024.19	6.02679	5.6266	3.66492	6.66667	4.06477	2.98171	2.23146	3.23455
14_+_26430	NM_011960	Parg	0.123715	0.312874	0.22633	0.250961	0.109256	1119.21	1092.69	1052.76	947.461	1057.89	34.1518	22.1228	23.2984	24.1808	13.104	12.1201	10.1708	11.3225
5_+_231440	NM_145562	Parm1	4.20598	1.95034	Inf	Inf	2.09556	3126.25	3446.31	2730.88	2998.8	3346.59	11.6071	12.1483	11.7801	12.9944	8.36617	9.83331	11.4491	10.0771
6_+_101187	NM_181402	Parp11	1.04725	1.29478	0.90164	0.728804	1.45186	2197.36	2093.12	2307.69	2333.47	2433.92	7.14286	6.52174	7.8534	8.24859	3.76339	5.09254	2.81962	2.66146
13_-_52552	NM_001081009	Parp8	0.489796	0.631579	2	0.666667	2.32258	274.31	271.711	273.937	273.722	272.423	41.7411	26.2148	32.9843	27.7966	17.2964	10.8556	9.16926	9.14793
7_+_57342	NM_020606	Parva	0.501961	0.152495	0.203508	0.361037	0.461927	2744.01	2560.57	2677.5	2732.3	2809.58	293.75	268.286	290.838	357.966	237.108	180.465	176.262	139.457
5_-_55982	NM_018878	Paxip1	0.321721	0.0545139	0.102214	0.0804303	0.456395	393.766	416	405.857	420	412.333	28.125	12.532	12.8272	12.2034	15.149	8.43418	4.81931	2.64765
17_+_18515	NM_017463	Pbx2	1.25719	0.531849	0.437189	0.644442	0.907149	703.135	812.912	619.738	796.25	683.41	7.58929	5.37084	6.28272	9.37853	10.6537	8.48246	10.7448	11.9191
13_+_72562	NM_028281	Pcbd2	0.743764	0.386185	1.02983	0.313776	4.25152	123.303	125.247	123	122.469	124	20.7589	24.5524	21.2042	27.1186	6.77781	8.003	17.6627	61.1957
15_+_18521	NM_001103165	Pcbp2	0.0651878	0.0645184	0.07008	0.0630121	0.056133	447.637	463.995	450.794	454.59	437.456	325.446	271.1	316.492	250.282	172.537	174.869	185.193	213.93
9_-_66904	NM_025835	Pccb	0.859701	0.208115	0.474041	0.939765	0.948081	558	593.293	528.333	605.281	555.075	12.9464	17.2634	16.7539	24.0678	6.55097	13.2571	17.6632	17.324
3_-_73173	NM_130448	Pcdh18	5.68007	1.88438	2.28818	2.50354	8.3283	1024.29	1145.38	1176.54	1063.83	1113.8	56.9196	35.8056	27.2251	32.2034	35.7807	20.5274	7.84254	10.8122
7_-_74737	NM_029078	Pcf11	1.39398	3.87218	0.85188	1.93609	1.68968	729.098	710.574	653.872	728.314	740.967	28.7946	25.9591	26.7016	20.565	10.6798	9.36469	8.97025	4.46676
11_-_22658	NM_001163308	Pcgf2	0.149551	0.3144	0.280864	0.345248	0.530203	906	448.286	633.529	451.038	818.716	9.375	10.8696	13.6126	16.7232	15.4057	17.6491	16.3494	18.7676
5_+_69587	NM_172716	Pcgf3	0.925663	0.362829	0.410698	0.834743	1.04055	3443.73	3376.95	3448.2	3535.09	3491	71.875	59.335	65.7068	58.4181	35.1387	33.2076	33.0919	27.8966
19_+_76073	NM_029508	Pcgf5	0.0421319	0.193104	0.129609	0.070648	0.0895302	2783.31	3165.97	2967.61	3708.67	3454.25	16.9643	17.5192	18.8482	11.9774	6.00729	6.89814	8.51839	4.1903
8_-_234069	NM_178708	Pcid2	5.9687	1.27851	1.22611	1.30814	2.59004	978.381	984.462	899.333	855.067	945.742	2.90179	3.83632	3.9267	3.50282	23.7325	24.0788	22.4604	16.6946
2_+_228866	NM_146129	Pcif1	0.214774	0.652131	0.472502	0.343638	0.475366	1755.54	1733.44	1827.74	2308	1602.62	5.58036	6.01023	3.9267	5.42373	14.1189	13.2581	13.3312	14.6555
8_+_18536	NM_023662	Pcm1	0.151416	0.374266	0.435111	0.294156	0.257856	1218.73	895.686	1092.56	1031.19	1196.01	19.1964	27.6215	24.8691	30.6215	23.1931	17.0394	8.31236	6.37004
1_+_319263	NM_183028	Pcmtd1	0.543691	0.186002	0.207793	0.315722	0.648792	2878.3	2919.27	2916.31	2949.84	2928.13	30.5804	48.3376	54.1885	54.2373	11.082	16.6354	16.8269	12.3933
2_-_18538	NM_011045	Pcna	1.4808	0.501279	0.80866	1.05317	1.06549	325.151	309.564	313.662	311.403	321.745	241.518	132.609	124.869	78.3051	267.85	166.123	171.629	109.426
16_-_76302	NM_001024622	Pcnp	10.5015	13.8641	12.5991	9.91637	8.64448	1585.31	1532.22	1583.08	1540.62	1607.4	154.911	131.714	151.832	130.847	86.3686	77.1934	91.6883	82.8313
12_+_54604	NM_018814	Pcnx	0.0834364	0.0658838	0.0657028	0.075396	0.0871329	1262.9	709.014	1408.28	1399.11	1108.48	15.625	10.3581	11.7801	17.9661	10.2554	6.20291	4.08291	4.64316
7_+_18553	NM_011048	Pcsk6	0.192137	0.21562	0.0662314	0	0	1341.89	1337	1340.78	1347.39	1341.38	4.6875	9.33504	8.11518	9.49153	11.8851	17.6687	5.7482	7.22999
11_-_18559	NM_008796	Pctp	0.214728	0.140915	0.187887	0.225464	0.375774	1570.27	1454	1510.49	1689.6	1555.33	5.35714	4.73146	6.5445	6.77966	2.27031	1.51213	1.79971	1.9875
6_-_66881	NM_025823	Pcyox1	1.38624	0.189876	0.419663	0.954861	1.41605	1852.12	1860.11	1892.66	1867.75	1878.28	45.5357	68.798	53.9267	80.339	32.8961	33.1498	25.7858	33.7917
3_-_56426	NM_019745	Pdcd10	0.207923	0.621663	0.546397	0.485623	0.493656	476.329	502.876	517.268	477.826	514.276	54.0179	62.9156	48.1675	55.7062	25.5584	30.3919	39.8025	24.4636
19_+_18572	NM_011053	Pdcd11	0.18242	0.37446	0.302657	0.348977	0.0629526	463.545	581.198	569.245	528.818	520.503	18.0804	19.821	17.2775	17.7401	12.8197	10.9274	6.65767	4.71162
9_-_18571	NM_011052	Pdcd6ip	0.0938134	0.316389	0.36651	0.391736	0.338138	754.005	870.262	951.576	1148.89	1176.07	210.938	193.478	234.555	208.136	136.151	108.421	85.407	72.3357
2_-_67466	NM_026176	Pdcl	4.09585	1.40905	1.51757	2.25218	2.73998	1668.78	1700.24	1699.45	1687.63	1710.89	41.7411	43.6061	39.7906	43.2768	22.497	23.1092	35.2123	25.0613
1_+_68833	NM_026850	Pdcl3	0.418278	0.306016	0.461189	0.355577	1.41302	627.4	581.109	553.69	463.6	724.656	10.2679	12.7877	10.4712	7.23164	133.122	133.32	160.504	105.49
7_-_213350	NM_172116	Pddc1	0.0127642	0.0197079	0.0684303	0.196207	0.0434734	804.487	779.305	808.354	774	776.129	13.1696	10.4859	11.7801	16.6102	11.9785	10.8799	11.8181	25.094
17_+_23984	NM_011866	Pde10a	0.14415	0.181387	0.285035	0.372189	0.478906	2169.29	3783.24	2731.83	2686.75	3008.44	5.58036	6.77749	12.5654	10.5085	4.86393	5.8016	11.4142	4.90798
9_+_18577	NM_183408	Pde4a	1.43175	0.282925	0.369522	0.744198	1.40324	1808.33	1864.96	1874.22	1792.56	1854.9	12.5	9.46292	7.06806	7.00565	12.8389	5.89544	2.74512	2.81648
3_-_18583	NM_008802	Pde7a	0.093331	0.0515268	0.034646	0.0533895	0.0611157	2797.83	2930.37	3023.3	2893.94	2823.88	6.69643	10.4859	13.8743	9.03955	9.83192	7.84994	5.52999	3.51777
13_-_218461	NM_001170669	Pde8b	0.662814	0.448674	0.483675	0.590852	1.47024	807.695	1174.68	1144.05	1152.63	1171.47	13.1696	21.2276	28.7958	23.1638	13.0888	15.5296	16.8391	19.1822
5_-_18590	NM_008808	Pdgfa	0.115639	0.149041	0.351243	0.263078	0.223329	934.102	942.608	955.237	928.331	919.588	27.9018	20.4604	32.4607	20	13.1367	15.2596	19.7142	33.4579
9_+_71785	NM_027924	Pdgfd	3.7949	1.51796	3.00339	2.33532	5.25822	1575	1534.98	1560.59	1593.63	1625.6	27.6786	44.6292	56.2827	57.8531	19.6746	31.0438	29.2702	22.4536
X_-_18597	NM_008810	Pdha1	4.32498	1.69338	1.92326	2.72891	1.97058	1273.7	1261.1	1285.94	1338.37	1268.91	163.839	143.99	133.77	103.503	112.322	98.1168	94.0159	65.1736
2_-_27402	NM_175094	Pdhx	0.248129	0.405211	0.293296	0.513267	0.903743	431.335	439.522	494.359	484.587	470.458	20.5357	18.1586	16.4921	13.5593	8.69313	8.0032	8.40989	8.72642
2_+_14827	NM_007952	Pdia3	0.0168807	0.00970521	0.0130259	0.00897409	0.0254651	245.743	252.114	239.879	249.5	237.952	54.6875	57.1611	76.4398	66.5537	532.069	644.344	863.524	532.945
2_+_228026	NM_172665	Pdk1	0.297712	0.384409	0.380748	0.356951	0.722125	2331.37	2144.85	2285.84	2463.93	2576.71	2.90179	9.46292	22.5131	31.2994	2.76523	7.22966	11.7324	11.1742
X_-_236900	NM_145630	Pdk3	2.03026	2.74223	2.13301	2.28475	1.33865	365.203	338.667	362.264	344.852	339.932	35.4911	47.4425	44.2408	46.6667	24.9792	33.6517	44.5276	31.9192
14_-_213019	NM_001253736	Pdlim2	0.0736592	0.124978	0.185169	0.13303	0.0551503	518.823	499.036	521	479.988	508.08	24.7768	62.6598	43.4555	56.7232	17.3506	39.7154	38.9805	32.1297
5_+_100710	NM_175310	Pds5b	0.420308	0.545015	0.353955	0.92324	0.80012	1564.62	1767.9	1712.63	1591.5	1883.74	27.9018	19.821	15.7068	18.0791	27.6985	15.865	10.6011	7.32005
19_-_107368	NM_001033222	Pdzd8	1.4298	1.13797	1.41686	1.41109	1.96259	2363.66	2206.83	2157.4	2199.76	2304.05	54.2411	54.9872	45.288	39.322	27.0207	25.9919	15.5517	10.705
1_-_18611	NM_011063	Pea15a	1.73436	0.40085	0.577292	0.719109	0.963921	1649.56	1616.48	1620.38	1656.95	1645.96	120.982	135.55	98.6911	117.966	65.1927	63.2719	47.7502	32.8998
3_-_73182	NM_001289601	Pear1	0.971041	1.54881	1.56412	1.54417	0.581067	538.221	611.779	524.873	581.747	544.481	15.1786	28.133	20.6806	24.4068	25.8296	23.4555	15.9938	18.0624
7_-_27412	NM_013788	Peg12	0.239277	0.137652	0.199294	0.189375	0.41878	2529.96	2367.13	2110.76	1962.33	2394.12	20.0893	9.59079	11.7801	8.47458	4.68169	2.65159	2.73264	1.70175
11_+_67245	NM_023324	Peli1	0.614707	0.330652	0.516222	0.493035	1.28096	1697.17	1713.38	1713.59	1657.57	1698.32	16.5179	13.0435	14.6597	13.3333	9.8291	7.40913	5.10519	4.87351
3_+_229487	NM_144896	Pet112	0.266837	0.255719	0.681917	0	0.185977	393.571	331.643	450.517	447	385.103	3.125	3.70844	4.45026	4.40678	1.53066	1.89865	3.61479	2.31806
5_+_71382	NM_027777	Pex1	0.0365079	Inf	0.027381	NaN	0.0730159	484.896	436.654	334.444	436.816	370.909	5.80357	4.60358	9.94764	8.70056	3.48543	3.23353	2.1799	2.07846
11_-_72129	NM_023651	Pex13	0.105662	0.14018	0.0956522	0.132285	0.128019	573.841	581.227	564.591	578.131	611.507	31.4732	34.399	37.9581	39.209	8.19682	9.74679	9.78393	8.1228
1_+_19298	NM_001159525	Pex19	0.40102	0.127333	0.153641	0.189407	0.24529	1410.37	1414.05	1456.8	1530.9	1360.99	19.1964	27.6215	24.0838	27.7966	33.3712	42.7805	31.4006	26.4514
1_+_18637	NM_011070	Pfdn2	0.171196	0.497045	0.350757	0.266865	0.0736376	341.455	223.089	256.613	248.696	283.172	129.911	103.708	115.445	78.6441	63.7674	66.3465	73.4355	95.2498
1_-_241062	NM_001163314	Pgap1	0.450465	0.571744	0.349498	0.900929	1.89195	6944.81	6092.53	5973.07	5849.27	6363.45	4.24107	3.58056	2.87958	4.51977	2.12583	1.16893	1.30557	1.54914
18_-_225467	NM_172627	Pggt1b	5.50362	1.83183	2.91634	3.45849	4.62434	4230.87	4097.59	4105.38	4444.55	4398.67	26.3393	19.9488	21.7277	20.904	18.1796	17.6147	11.577	9.56441
5_+_66681	NM_025700	Pgm1	0.168715	0	0.127276	0.0604563	0.235927	350.41	325.086	346.995	330.789	343.313	44.1964	25.5754	32.199	26.3277	16.6229	17.2833	15.2839	10.3004
9_-_109785	NM_001163746	Pgm3	0.426272	1.65789	0.888848	1.17225	0.334928	350.571	381	349.353	374.1	355.182	24.1071	34.0153	44.5026	34.1243	12.7457	13.2613	15.9136	11.8903
17_+_67078	NM_025954	Pgp	2.23082	1.09509	1.31862	8.01334	0.482226	426.128	368.731	521.892	461.502	483.691	72.3214	74.2967	77.2251	72.0904	28.0076	31.45	48.2282	41.7897
8_-_66522	NM_023217	Pgpep1	0.108314	0.220855	0.146263	0.134404	0.130904	1419.43	1178.68	1394.12	1399.22	1621.05	7.58929	14.4501	10.733	16.4972	13.8666	17.3218	21.2443	19.8108
X_+_53328	NM_016783	Pgrmc1	2.77778	2.55376	2.45421	3.05983	1.91515	935.928	905.978	977.588	999.806	957.267	144.196	117.263	129.319	94.9153	105.846	83.183	102.342	88.1837
3_-_70804	NM_027558	Pgrmc2	0.054878	0.0616568	0.103709	0.086243	0.109165	1214.12	1185.82	1203.6	1227.37	1226.03	81.4732	114.706	118.325	112.203	19.7532	28.0408	27.7802	29.3265
10_-_215789	NM_001033257	Phactr2	0.508302	0.56558	0.640252	0.534272	0.607693	4393.88	4187.84	4528.48	4554.44	5105.56	9.82143	8.4399	8.37696	9.9435	5.86976	5.97474	3.45312	3.60306
18_+_56698	NM_019996	Phax	0.0664955	0.085431	0.0552632	0.0374942	0.241948	175.489	138.918	164.479	156.051	166.141	87.5	82.4808	61.7801	71.2994	26.3918	32.183	38.5707	54.3885
11_+_18673	NM_008831	Phb	0.132454	0.135247	0.140641	0.10451	0.125311	326.411	260.145	277.55	245.871	292.778	89.0625	98.3376	80.8901	73.2203	104.258	125.513	109.84	83.7057
3_-_241915	NM_001165956	Phc3	0.817649	0.719418	1.04716	2.47112	2.51351	6872.73	6524.36	6707.69	7171.94	7279.24	8.70536	9.07928	12.8272	11.9774	24.4949	15.3047	7.63954	12.9305
11_+_268448	NM_174852	Phf12	3.26667	0.41548	0.590095	1.25809	1.11799	800.159	796.882	815.29	827.065	840.805	28.3482	19.821	20.1571	28.3616	13.8483	11.4514	9.37533	12.7507
13_-_18676	NM_011078	Phf2	0.333711	0	0.15017	0	0.914402	1829.23	1830.33	1833.28	1837.8	1836.35	16.2946	14.1944	15.445	17.5141	9.99849	6.05399	2.96273	3.27452
2_+_228829	NM_172674	Phf20	0.533969	0.441458	0.538995	0.586183	0.676318	1687.05	1908.86	1844.11	1832.26	1866.95	18.75	22.89	22.2513	29.6045	9.70745	10.002	13.087	14.3921
15_+_239510	NM_001081409	Phf20l1	1.19475	0.649622	0.683662	0.807517	1.62028	2257.99	2368.6	2432.18	2438.25	2419.93	23.6607	32.3529	26.9634	19.887	12.0149	16.2737	12.6347	8.84697
11_+_78246	NM_001291127	Phf23	0.742267	0.449432	0.662516	0.949533	0.45619	341.025	367.429	346.893	347.379	348.181	17.1875	26.3427	22.7749	20	35.5625	43.1554	45.2061	37.4562
1_-_213109	NM_001081080	Phf3	0.127818	0.12806	0.111111	0.173489	0.171717	774.266	856.61	749.932	762.699	792.645	38.3929	35.9335	24.3455	33.1073	21.1427	19.6796	19.6283	24.0223
9_-_83946	NM_001081216	Phip	3.88267	1.23946	2.11995	4.00175	3.76927	4396.85	4837.72	4263.97	4097.34	4464.86	8.70536	8.69565	9.1623	14.1243	13.7839	8.94201	10.9686	11.3426
X_-_18679	NM_008832	Phka1	0.516942	0.32988	0.739731	0.712805	1.0952	1228	1073.29	1455.07	1231.8	1418	7.8125	5.24297	10.4712	8.24859	5.25461	4.23123	3.29534	2.85407
16_-_208177	NM_153412	Phldb2	0.589241	0.12255	0.216572	0.149141	1.03404	1488.35	1495.64	1497.25	1496.89	1487.99	360.045	233.632	233.508	241.356	162.3	94.2574	96.8275	78.4064
2_+_73373	NM_028521	Phospho2	0.372617	0.338404	0.719574	0.128296	0.23428	795.417	817.075	779.456	848.926	876.248	29.6875	27.4936	28.2723	30.9605	9.87217	10.1939	10.1986	10.9405
1_+_94227	NM_053191	Pi15	1.3254	1.3254	1.92786	2.11214	2.76775	5776.37	4446.24	5228.86	5241.82	5602.78	7.58929	8.05627	14.9215	9.60452	5.69134	4.16571	3.82649	2.0183
9_-_56469	NM_019663	Pias1	0.292529	0.835643	0.911867	0.94272	0.614311	1586.03	1498.27	1886.56	1885.87	1977.7	15.8482	13.8107	10.2094	17.0621	13.152	9.60342	9.28762	11.6555
7_+_233489	NM_001252524	Picalm	0.0840857	0.037552	0.0186708	0.0577018	0.185078	1339.26	1348.13	1342.23	1347.84	1347.46	365.625	301.023	271.466	192.881	282.869	227.792	117.789	75.3442
X_+_18700	NM_011081	Piga	0	0.446281	0	0.409091	0.511364	2008.96	2002.26	1990.75	1987.83	1980.03	12.0536	6.13811	7.59162	6.55367	7.99386	4.50117	4.4816	2.72959
9_-_55981	NM_018889	Pigb	0.333561	0.359886	0.331825	0.27332	0.689116	2804.64	2747.06	2857.49	3045	3465.3	4.01786	4.73146	4.97382	5.9887	8.99001	7.35734	5.00915	6.98653
3_+_329777	NM_178016	Pigk	0.506491	2.61954	1.52903	0.979906	0.556004	2148.64	2028.13	1902.42	1916.58	2037.46	77.2321	79.7954	88.4817	122.825	27.3127	29.4041	28.8431	28.566
11_+_327942	NM_001039536	Pigl	1.53776	0.450865	0.322338	0.586649	0.741659	2127.49	1663.5	2182	1905.71	2691.65	6.25	5.11509	4.45026	3.50282	8.65086	6.32795	8.0615	8.02956
1_+_67556	NM_026234	Pigm	0.108075	0.21276	0.284395	0.249307	0.205083	1326.98	1249.52	1138.47	1180.93	1497.4	33.4821	33.6317	41.3613	30.9605	9.75618	7.77708	5.27697	3.19443
1_-_27392	NM_013784	Pign	3.03271	0.423892	0.594308	1.15385	1.24955	2972.52	3102.44	3191.18	2758.27	3171.51	17.6339	18.9258	16.2304	21.9209	19.9681	15.3679	12.0289	8.12729
4_-_230801	NM_001145956	Pigv	0.854376	0.370318	0.230831	0.179869	0.920097	874.874	653.96	729.571	918.6	847.714	5.58036	4.4757	2.6178	5.53672	1.77646	2.92878	4.21304	2.89379
7_-_18704	NM_011083	Pik3c2a	2.71016	0.395502	0.450605	0.717904	1.03363	2643.25	2669.13	2638.09	2647.77	2654.98	66.5179	102.046	93.7173	56.8362	31.2616	59.8967	58.2586	21.7362
3_+_18706	NM_008839	Pik3ca	0.279147	0.131352	0.161311	0.186658	0.229502	1384.6	1658.42	1750.96	2082.21	1677.47	29.9107	37.9795	36.6492	34.6893	19.1874	19.2677	10.4201	10.9353
9_-_74769	NM_029094	Pik3cb	0.170448	0.0647939	0.129035	0.125716	0.23037	1389.82	1346.44	1362.66	1599.65	1408.04	11.1607	10.4859	8.90052	5.31073	6.60338	4.91612	2.98201	1.15294
11_+_216505	NM_178149	Pik3ip1	3.43369	3.05783	0.910448	1.49926	1.93098	1055.93	972.294	1006.27	980.605	1072.11	3.79464	10.3581	9.94764	21.8079	3.90536	8.33071	9.83633	27.2137
4_+_18710	NM_181585	Pik3r3	0.300933	0.112294	0.0895264	0.277151	0.384737	3174.42	3149.06	3158	3155.87	3164.67	7.58929	11.8926	11.7801	21.0169	8.97909	11.7765	1.77275	1.77027
17_+_18712	NM_008842	Pim1	0.629496	0.0496648	0.0829093	0.108488	0.940872	1179.78	1268.5	1194.5	1288.61	1281.71	4.01786	2.55754	6.02094	3.16384	6.83069	5.57031	10.4874	5.27941
2_-_18718	NM_008845	Pip4k2a	3.40465	1.29622	1.22879	2.01481	2.50504	1869.28	1672.8	1787.99	1729.47	1855.17	31.25	27.4936	25.3927	28.4746	22.7192	18.4758	15.7963	12.645
11_-_108083	NM_054051	Pip4k2b	3.85589	1.02133	1.04627	2.23941	3.1958	3608.66	3581.58	3590.47	3582.83	3633.18	42.8571	58.4399	54.1885	46.4407	12.508	11.3246	6.40203	6.36735
X_+_69656	NM_027153	Pir	0	0	0	0	0.283019	223.613	224.935	240.429	259.414	234.705	6.91964	8.05627	7.59162	14.9153	2.45632	4.59723	6.63843	7.30726
11_-_71795	NM_145823	Pitpnc1	0.261671	0.397946	0.359581	0.261371	0.397423	3180.72	2834.65	3221	2764.6	3463.17	12.7232	5.88235	14.3979	14.8023	9.54408	4.47417	6.98867	7.10207
13_+_69617	NM_145131	Pitrm1	4.37609	1.54335	2.39394	3.31406	9.95798	284.848	286.432	286.222	285.79	286.575	104.911	101.023	96.0733	74.2373	53.7112	43.5918	33.0186	20.1017
13_-_18740	NM_011097	Pitx1	0	0.095467	0.0675507	0	0.668269	1007.22	1013.16	1008.07	1017	1002.95	5.58036	10.9974	7.06806	9.26554	5.35498	8.36928	10.4437	13.8426
X_-_18744	NM_008853	Pja1	0.0637266	0.0284039	0.0202705	0.0365398	0.164926	415.269	425.72	433.955	411.123	418.322	55.8036	48.0818	44.7644	46.6667	28.832	28.5418	26.5485	28.3095
17_-_224938	NM_001025309	Pja2	0.314215	0.313453	0.340731	0.573373	0.723913	1807.08	1953.15	2057.1	2102.06	2025.1	104.018	90.1535	89.5288	107.571	68.7164	49.5544	45.4013	39.9503
8_-_320795	NM_001199593	Pkn1	0.405107	0.737338	0.669107	0.609441	0.715608	2725.7	1894.38	2405.07	1692.59	2459.89	16.9643	16.7519	12.0419	21.6949	20.6	22.8484	17.1719	9.09588
3_-_109333	NM_178654	Pkn2	0.35436	0.198188	0.22631	0.343099	0.697659	2029.54	2099.14	2154.06	2065.94	2160.14	68.75	54.3478	49.7382	52.3164	58.5979	47.0723	25.0458	17.9082
2_-_18779	NM_008867	Pla2r1	0.782069	0.662727	0.617143	0.316957	0.765	807.592	890.133	798.484	730.727	918.011	3.34821	3.96419	8.63874	10.5085	2.47494	2.19077	2.15586	2.97727
4_-_18786	NM_172695	Plaa	0.134406	0.328548	0.358416	0.358416	0.171741	430.077	479.352	554.877	545.104	669.681	77.9018	74.6803	85.3403	66.6667	73.0016	64.1166	58.8416	30.0461
7_+_18793	NM_011113	Plaur	0.41825	0.0734071	0.120245	0.14531	0.52587	460.458	441.9	460.179	428.11	426.886	67.1875	28.6445	19.1099	15.8192	105.352	45.4309	63.8282	33.9699
5_-_71772	NM_023625	Plbd2	0.390413	0.375145	0.386277	0.449904	0.541326	1086.82	1167.82	1249.58	1380.69	1262.35	17.4107	23.913	22.5131	35.8192	33.4276	38.7789	32.2551	41.8475
19_-_18797	NM_008874	Plcb3	0.0574918	0.0324377	0.0317698	0.0371237	0.0139638	1129.46	569.768	619	443.113	638.554	15.4018	10.4859	13.8743	11.4124	28.6955	19.089	14.1638	14.1774
1_+_227120	NM_001114663	Plcl1	0.326511	0.193488	0.257063	Inf	0.561116	729.063	843.981	712.617	690.382	782.434	11.8304	16.3683	8.90052	9.37853	4.0728	4.12583	1.67484	1.14379
8_-_83436	NM_031257	Plekha2	0.736769	0.536648	0.644626	0.887201	1.06304	3349.51	3011.65	2973.53	2942.67	3469.37	3.79464	2.42967	3.9267	6.66667	4.50286	3.05664	3.67516	4.14394
2_+_83435	NM_031256	Plekha3	0.219261	0.091719	0.0936985	0.130643	0.185727	1114.42	1122.36	1121.49	1115.28	1114.87	72.9911	61.509	58.9005	58.9831	33.0101	28.8239	31.9311	25.6885
6_+_109135	NM_144920	Plekha5	2.13194	4.9713	2.32575	5.45099	4.67794	3175.35	3302.35	3202.78	3205.06	3101.24	11.6071	9.46292	8.37696	13.6723	9.26249	4.57282	6.03943	6.50831
6_+_231999	NM_001001335	Plekha8	0.332153	0.341698	0.294929	0.206164	0.0281934	1879.26	1719.09	1265.71	962.286	1461.19	9.59821	8.05627	5.49738	8.81356	4.15242	4.46426	4.57925	4.82466
4_-_71801	NM_175175	Plekhf2	0.766175	0.406545	0.494059	0.816863	1.01513	1636.75	1677.75	1667.64	1416.57	1602.55	22.9911	19.6931	14.6597	14.9153	11.2607	11.6023	8.06055	3.66614
12_+_263406	NM_153804	Plekhg3	0.0430929	0.0941331	0.096976	0.052588	0.0289581	858.25	1141.48	894.319	1099.1	1045.71	24.1071	17.6471	16.2304	21.3559	18.0643	10.3606	8.65131	6.67482
17_+_213556	NM_177606	Plekhh2	2.0664	0.936722	1.10678	1.08675	2.6142	2094.24	2015.72	2198.46	1963.84	2064.44	18.5268	17.1355	21.7277	27.7966	8.68364	6.32825	3.37801	4.12593
11_-_353047	NM_183034	Plekhm1	0.0894154	0.0776964	0.0509901	0.0962269	0.385094	1876.21	1842.88	1933.57	1908.29	1923.29	10.7143	11.7647	12.8272	14.0113	4.94933	6.21138	6.5873	5.26633
13_+_20620	NM_152804	Plk2	0.332636	0.321413	0.174634	0.194904	1.96463	596.448	596.113	584.188	598.932	596.887	106.92	171.228	150	148.588	76.8515	98.3598	82.4164	86.5337
9_+_26432	NM_011961	Plod2	20.9783	16.3227	12.6501	20.4979	24.2477	1143.29	1162.44	1099.21	1133.2	1150.87	18.0804	19.9488	33.5079	27.0056	20.4156	35.9322	33.809	31.6211
3_+_53317	NM_016784	Plrg1	0.0617204	0.0273333	0	0	0.121983	126.257	125.518	127.528	125.474	126.653	55.5804	49.3606	44.7644	44.9718	37.5671	33.8927	28.7764	28.6131
9_+_18828	NM_008880	Plscr2	1.21533	0	1.03683	2.08593	1.63222	450.286	492.526	493.661	506.125	508.333	4.24107	7.54476	8.37696	8.13559	1.89451	5.70849	6.18067	8.16997
2_-_18830	NM_011125	Pltp	0.00870123	0.00788316	0.0204962	0.0297526	0.0152337	750.478	185	301.125	522.818	520.783	2.45536	4.09207	2.87958	9.37853	6.02742	8.25135	14.5291	40.0751
X_+_18846	NM_008883	Plxna3	0.156684	0.170534	0.197165	0.157641	0.220091	1002.47	880.556	899.595	862.75	973.485	6.02679	4.73146	7.32984	7.68362	6.43981	5.15885	4.32681	4.38033
6_-_67784	NM_026376	Plxnd1	0.671543	0.093936	0.19324	0.187235	0.996711	853.667	749.6	816.5	838.8	797.917	1.11607	1.53453	1.3089	1.35593	5.83437	4.61083	4.46905	3.04136
2_-_65112	NM_022995	Pmepa1	1.29961	4.13396	4.73788	4.56832	2.12741	1193.81	1137.69	1178.4	1192.29	1247.13	257.366	259.335	230.89	194.576	129.455	125.396	140.576	119.039
9_-_18854	NM_008884	Pml	1.28085	0.478869	0.593416	0.757606	0.779146	1539.05	1517.17	1572.64	1515.87	1560.02	21.4286	25.7033	18.5864	25.4237	19.9792	16.5553	12.2696	13.6879
2_+_66865	NM_173180	Pmpca	2.75738	3.77595	2.96739	2.21196	1.13628	1368.36	1350.35	1294.76	1375.24	1338.25	98.2143	73.6573	90.5759	70.3955	49.5068	39.0616	25.4717	17.65
7_+_59047	NM_001290767	Pnkp	0.138547	0.343482	0.465673	1.08529	0.0247406	244.081	213.949	178.117	252.543	193.641	17.6339	17.5192	18.3246	16.3842	14.4653	12.3687	17.1419	14.0206
12_+_18949	NM_008891	Pnn	0.392466	0.535181	1.02314	0.606974	0.648393	645.915	580.113	619.561	560.994	650.656	104.464	74.9361	86.1257	62.7119	26.5628	18.496	17.7128	17.1329
11_-_66249	NM_025443	Pno1	0.374335	0.362637	0.285714	0.123526	1.87625	668.003	646.704	651.792	646.89	662.17	118.973	97.3146	92.4084	70.6215	48.0501	43.7284	50.6549	26.0177
12_+_67452	NM_026164	Pnpla8	0.173039	0	0	0.220625	0.350198	762.286	736.148	736.481	745.897	749.838	24.1071	17.0077	25.3927	25.0847	12.2203	12.3088	12.6337	9.39821
11_+_71701	NM_027869	Pnpt1	1.2037	0.378307	0.264815	0.220679	3.59392	180.81	183.358	182.942	182.875	183.522	14.9554	13.2992	18.8482	12.9944	20.9226	18.528	16.2944	11.7362
4_-_108767	NM_001033225	Pnrc1	1.89787	0.546453	0.671077	0.832291	1.18798	608.181	608.361	613.476	602.515	604.645	24.1071	51.2788	76.178	76.4972	6.2879	20.489	50.2937	49.5245
13_+_67463	NM_026173	Poc5	0.0536099	0.172686	0.284356	0.243199	0.560021	1818.76	1633.75	1994.27	1432.65	1816.08	2.67857	4.21995	4.45026	4.0678	7.68654	5.49387	4.06792	3.36866
2_+_140484	NM_080463	Pofut1	0.344389	0.122549	0.183478	0.257405	0.31033	2742.41	2846.19	3010.81	2143.28	2371.04	9.375	9.46292	11.2565	12.3164	17.4149	15.1927	10.9141	9.26073
1_-_71592	NM_001142948	Pogk	0.456855	0.136492	0.32883	0.675258	0.277947	3930.68	4031.16	4054.32	3987.24	3958.9	8.25893	9.20716	14.3979	11.8644	7.296	8.74794	7.01892	5.71582
16_-_224143	NM_172380	Poglut1	0.379621	0.134443	0.203985	0.229796	1.03806	1481.77	1481.07	1480.7	1483.79	1481.33	43.3036	40.9207	38.2199	56.3842	30.5021	32.1107	31.3482	30.2471
3_+_229584	NM_001165948	Pogz	0.510002	0.946012	0.760341	1.0595	0.405112	1077.34	1023.25	784.723	791.109	1081.17	13.3929	10.6138	12.0419	15.7062	8.84939	6.78715	3.70803	4.34274
7_-_67967	NM_133692	Pold3	1.10784	0.665533	0.670287	0.423584	1.3685	1307.7	1280.6	1338.24	1134.69	1429.28	26.7857	11.509	8.37696	9.26554	8.83969	3.86831	5.75936	4.55497
11_+_67811	NM_026389	Poldip2	0.566593	0.614577	0.65294	0.691861	0.55484	731.637	727.107	723.676	717.908	721.592	62.5	69.9488	71.2042	67.7966	32.7467	33.9688	33.7137	36.2661
4_-_59001	NM_021498	Pole3	0.808829	0.730909	0.760843	0.97222	0.218021	309.783	358.326	408.05	371.321	350.507	63.6161	67.0077	65.1832	61.2429	15.9905	14.889	13.3416	9.90923
6_-_66979	NM_025882	Pole4	0.280021	0.476359	0.352395	0.222586	0.481682	654.215	703.462	658.961	655.86	648.058	58.0357	46.2916	44.7644	30.9605	22.2918	18.4805	19.9933	19.3653
7_-_18975	NM_017462	Polg	0.854707	0.920928	1.08402	1.06774	1.04007	579.093	593.362	620.088	621.153	593.021	36.3839	23.1458	18.8482	21.9209	18.1757	12.6189	11.0627	9.19518
17_-_80905	NM_030715	Polh	0.15741	0.325527	0.244859	0.158828	0.309296	906.872	949.671	956.121	988.186	1012.29	31.9196	11.6368	15.445	9.49153	16.1846	8.04639	6.54713	2.78139
13_-_27015	NM_012048	Polk	0.831413	0.102937	0.153906	0.078867	1.57836	1464.5	1474.88	1477.21	1477.81	1469.63	18.3036	14.4501	12.5654	18.3051	27.0151	22.1625	10.9624	9.22916
6_+_20019	NM_009088	Polr1a	0.021025	0.0745096	0.0816608	0.0299878	0.0478479	1016.33	1094.61	1018.28	1042.15	1088.39	13.8393	11.3811	12.3037	10.0565	21.8789	12.9465	8.04668	4.48756
4_+_64424	NM_001285800	Polr1e	0.017284	0.0740741	0.0724138	0.0378947	0.0375	465.615	330.667	461.33	586.787	354.899	20.7589	14.3223	15.9686	15.7062	14.0239	10.1777	11.5868	10.9014
18_+_69241	NM_027002	Polr2d	0.222799	0.200519	0.170057	0	2.44573	567.766	568.545	564.233	559.517	567.846	7.36607	5.49872	7.59162	4.40678	31.3112	28.5526	37.7109	33.4538
15_+_17749	NM_023127	Polr2k	1.17955	1.52051	0.946094	0.788411	1.38116	183.444	183.486	184.075	182.27	181.702	139.509	127.494	126.178	107.232	5.82466	6.77782	7.14137	35.3041
10_+_70428	NM_027423	Polr3b	0.999661	2.06261	0.769734	1.04956	0.66688	1324.31	1189.83	1239.91	1116.71	1294.89	5.13393	11.6368	8.90052	12.6554	7.38239	7.06836	4.76698	3.90862
3_-_74414	NM_028925	Polr3c	6.54385	2.58494	2.7799	3.5177	6.10336	434.637	447.646	443.4	436.412	440.68	17.6339	30.0512	22.2513	23.2768	20.0322	22.4533	24.7458	21.088
7_+_26939	NM_001164096	Polr3e	1.20475	0.145868	0.258329	1.10964	1.20553	485.578	563.317	482.695	598.515	488.849	36.6071	26.8542	25.9162	20.226	14.5147	12.8889	8.9486	5.86123
2_+_70408	NM_029763	Polr3f	2.00932	1.1107	1.26323	1.38522	1.74385	2948.47	2743.31	2738.29	3118.98	2966.51	16.5179	16.1125	13.3508	9.15254	9.84265	9.03454	8.85321	4.45116
2_+_67005	NM_025901	Polr3k	1.2771	0.651306	0.733098	1.18457	0.508146	938.971	920.729	960.025	1021.4	1015.46	67.6339	57.1611	50.5236	58.4181	7.54078	8.04028	10.6394	10.1111
[truncated: 1,166 more rows]

## Sheet: Column_description
entrez_ID:	The chromosome, strand and Entrez ID of the gene where the pA located.
Refseq_ID:	RefseqID of of the gene where the pA located.
gene_symbol:	Official gene symbol.
G0_RUD:	RUD value of the gene in G0 stage of PD6 passage of MEFs.please see details in the Methods part of the manuscripts.
PD6_RUD:	RUD value of the gene in PD6 passage of MEFs.please see details in the Methods part of the manuscripts.
PD8_RUD:	RUD value of the gene in PD8 passage of MEFs.
PD10_RUD:	RUD value of the gene in PD10 passage of MEFs.
PD11_RUD:	RUD value of the gene in PD11 passage of MEFs.
G0_E3UTR:	Effective 3'UTR value of the gene in G0 stage of PD6 passage of MEFs.please see details in the Methods part of the manuscripts.
PD6_E3UTR:	Effective 3'UTR value of the gene PD6 passage of MEFs.
PD8_E3UTR:	Effective 3'UTR value of the gene PD8 passage of MEFs.
PD10_E3UTR:	Effective 3'UTR value of the gene PD10 passage of MEFs.
PD11_E3UTR:	Effective 3'UTR value of the gene PD11 passage of MEFs.
PD6_TPM:	TPM value of the gene in PD6 passage of MEFs.please see details in the Methods part of the manuscripts.
PD8_TPM:	TPM value of the gene in PD8 passage of MEFs.
PD10_TPM:	TPM value of the gene in PD10 passage of MEFs.
PD11_TPM:	TPM value of the gene in PD11 passage of MEFs.
PD6_fpkm:	FPKM value of the gene in PD6 passage of MEFs.please see details in the Methods part of the manuscripts.
PD8_fpkm:	FPKM value of the gene in PD8 passage of MEFs.
PD10_fpkm:	FPKM value of the gene in PD10 passage of MEFs.
PD11_fpkm:	FPKM value of the gene in PD11 passage of MEFs.

## Sheet: Sheet3
entrez_ID	P3_fpkm	P4_fpkm	P5_fpkm	P6_fpkm
14_-_74430	2.43338	2.07481	2.33523	1.45147
6_+_56150	48.7728	22.2221	28.7074	14.1356
1_-_226409	3.07441	2.14157	1.68964	1.24174
13_-_17121	5.1966	3.40624	4.68579	2.2227
3_+_76131	15.0973	6.65387	5.74804	1.49352
6_-_19362	7.58441	2.85028	3.35448	1.20483
5_+_77521	1.32215	3.1812	2.89461	2.83629
4_+_14579	3.73563	4.22018	5.49888	5.6039
13_+_71991	2.74108	2.45324	2.08129	1.88086
19_+_16551	25.3111	9.57653	7.7673	1.71886
6_-_16974	34.1068	35.7494	52.3434	59.7219
12_+_217835	7.57152	7.02778	4.92999	4.05605
13_+_218121	5.13736	2.65103	2.24153	1.63732
3_+_14173	50.1217	37.142	29.4453	17.745
3_+_72776	6.90538	2.98144	1.81746	1.08496
14_-_14619	5.8263	13.0371	8.66831	5.22031
13_-_15216	1.22528	2.06027	2.61206	5.80375
2_-_108699	5.87505	5.49603	5.39882	7.17039
11_+_217203	1.51076	2.44186	1.84665	4.93985
14_-_108912	16.6676	5.81865	3.94187	1.63664
11_+_23834	13.2719	3.44093	2.73656	1.0873
5_-_330064	2.69387	2.12314	2.55946	1.17744
9_+_18828	1.89451	5.70849	6.18067	8.16997
17_+_100041621	3.17786	3.12466	4.48038	3.15742
17_-_22643	8.12817	3.97565	2.88264	1.28868
7_-_56707	5.19608	3.82574	2.86691	1.55222
12_+_76044	20.9118	7.94784	10.2139	3.52386
4_+_12448	29.6137	7.56251	6.25507	3.30454
9_+_382137	2.57093	2.96292	3.30677	1.7076
3_+_213498	8.50918	7.35101	3.34494	2.75651
1_-_19258	3.85532	1.89757	1.55574	1.27094
4_+_242481	147.091	108.529	78.8991	51.7158
17_-_12193	97.8818	89.3376	67.2993	74.8156
6_-_67784	5.83437	4.61083	4.46905	3.04136
4_+_230279	1.9402	2.74481	2.79608	2.67405
8_+_56229	3.63327	2.30066	2.35033	2.15824
9_-_12649	7.02691	4.59158	4.44864	1.28333
8_-_212728	5.91348	3.13528	2.03093	1.1681
18_-_12532	4.81815	3.41341	3.329	2.45444
12_-_217653	12.1945	4.83582	4.75956	1.93296
11_+_15412	2.81893	2.27742	2.59578	3.82817
17_-_240064	3.17016	1.764	1.46882	1.85049
9_+_244721	2.40402	2.22571	2.86514	1.76383
8_-_69068	2.27017	2.462	8.62136	4.64606
16_-_110948	2.09909	2.08357	1.81056	2.59452
8_-_234069	23.7325	24.0788	22.4604	16.6946
9_+_74486	1.48794	1.17115	1.19107	1.08955
5_+_330189	3.37908	5.86287	4.95647	2.0191
18_+_225791	29.2103	26.1767	27.6465	17.024
8_+_236193	1.89349	1.91988	1.77841	1.30066
1_+_68549	13.1317	3.66449	4.7947	1.85906
6_+_68498	1.05585	1.15572	4.12785	3.21621
6_+_272347	2.99226	2.06517	1.11504	1.55617
3_+_72607	2.79082	1.24878	2.12189	1.62078
7_+_67164	3.06867	1.63425	1.49061	1.84568
11_-_20856	1.2905	3.64564	4.03316	2.31844
9_+_208194	4.80337	3.30691	3.55326	3.24307
17_-_224694	3.24532	1.98687	1.18097	2.1383
16_-_22268	1.97303	1.69236	1.87017	2.53493
X_+_54630	1.40845	1.01788	3.11591	1.40162
18_+_545260	1.21967	1.34748	1.27071	4.86213
4_-_654812	1.2165	1.96112	8.55244	9.31242
6_+_317758	1.64787	1.14272	1.54285	1.16439
6_+_71777	4.90415	6.09633	4.8508	3.7635
10_-_18605	8.45594	4.58473	6.79164	6.61543
5_-_64339	3.05792	2.63978	2.97746	4.02207
17_-_72415	6.28603	3.09018	3.53083	1.11771
17_-_240174	8.59904	3.52465	1.40062	1.69578
9_-_235283	1.87724	3.233	1.96952	2.17518
3_+_320782	1.12931	2.32141	2.87312	1.83504
7_+_243834	2.87891	2.16655	1.34789	1.17778
9_+_104099	6.88802	4.94116	3.7254	4.64818
1_+_13714	30.2242	30.292	25.1864	20.7654
8_+_78816	6.66098	3.39978	5.0384	5.38673
11_-_15574	5.14875	3.69016	1.64942	1.57707
10_+_54140	4.0082	11.8614	7.27024	9.58983
17_-_240041	3.12159	4.1894	4.25826	8.11788
7_-_71131	3.67558	2.33287	2.34706	1.05901
9_-_72179	2.63002	3.5838	3.63498	3.90507
14_+_72391	6.16841	5.02539	8.57089	1.65117
2_+_108907	10.6358	5.7501	6.56857	2.86779
3_-_13638	1.19799	1.10125	1.37306	2.39188
1_-_93840	4.0859	3.27172	5.33815	4.8567
1_-_241062	2.12583	1.16893	1.30557	1.54914
1_-_319651	5.81693	3.41054	2.06047	1.80465
11_-_56077	3.85499	4.14283	1.91648	1.546
1_+_94227	5.69134	4.16571	3.82649	2.0183
8_-_76478	12.8828	7.84211	11.5014	5.35041
5_+_212919	1.22324	1.31229	1.4613	1.91696
3_+_229487	1.53066	1.89865	3.61479	2.31806
3_-_99526	3.75093	6.34953	3.88491	2.63281
7_-_18020	3.38234	2.13316	2.3327	1.41458
18_-_68857	1.73259	1.81938	1.81015	1.97989
10_-_544717	2.31539	3.97201	4.36431	6.82893
1_+_252876	2.3482	2.55056	4.45355	2.17319
12_-_209334	7.51119	3.12771	2.40909	1.15885
6_-_66441	10.1547	8.34788	9.93524	15.0799
12_+_194655	1.53483	1.36498	1.63655	2.48239
9_-_235504	3.79633	3.52324	4.44199	4.82222
6_+_67582	2.9023	2.45345	1.93956	3.55371
17_-_76441	2.94374	1.91571	1.2367	1.37909
1_-_22779	4.24009	1.56014	1.87017	1.63899
6_-_58186	18.6595	7.57532	9.03801	2.95017
3_-_229503	4.48404	4.95316	5.93832	7.45357
11_+_69944	1.61599	1.34996	1.4539	1.1244
13_-_22017	3.1398	5.4477	5.52944	4.31414
17_+_240068	1.92507	3.22048	2.09906	1.34722
4_+_230582	2.04294	2.86658	2.23195	3.32063
5_-_67266	3.55657	4.78972	5.13609	4.69646
X_-_77622	8.81772	8.32318	8.69398	5.67068
3_-_229706	9.06498	3.86604	3.54738	5.59949
1_-_76843	19.0985	6.04716	4.15544	2.19792
12_+_76820	2.17922	2.47478	2.20519	2.56236
2_-_110751	3.52656	7.18851	6.82591	8.04491
14_+_219140	5.05838	2.48409	2.28027	1.1165
5_+_72154	5.17452	4.15768	4.70345	5.30368
17_+_240067	1.81814	1.4906	1.50544	2.22737
9_-_72828	3.02898	1.36045	1.95876	1.03066
17_+_224836	15.8939	13.0065	12.1288	12.8739
14_+_75901	9.2121	7.2707	6.24916	5.18158
16_-_78885	7.66483	5.37131	4.72031	5.8388
X_-_209224	3.12085	2.46695	3.33898	3.45932
5_+_77569	4.73518	4.49816	2.34084	3.48771
19_-_67573	15.8364	10.6292	14.4195	10.2117
17_-_240028	46.8712	24.1084	4.95697	4.34262
X_-_77286	7.75008	7.07752	3.87241	2.59491
7_+_78286	35.8743	20.004	22.1462	22.294
7_-_71723	2.66187	2.80618	4.3506	2.51561
X_-_54646	9.29119	11.0437	13.1158	13.8158
17_-_18044	21.3385	9.27372	7.37381	6.81188
5_-_13717	7.44803	19.921	7.44547	12.3094
11_-_21975	5.9183	5.31079	3.39465	3.16065
9_+_244672	4.45052	4.09498	3.91378	4.11154
11_-_19696	3.40205	3.09745	2.77252	2.4417
17_+_72462	13.6799	6.95689	6.04535	4.12474
18_+_16906	26.3773	16.4276	13.1736	4.93906
19_+_94219	1.80036	2.84942	2.69196	4.21927
13_+_67463	7.68654	5.49387	4.06792	3.36866
4_+_11639	4.64411	5.47589	8.16354	6.3636
1_+_98314	3.22411	2.87695	1.7636	3.67274
8_+_26457	4.84562	5.22015	7.24597	4.55406
8_-_19727	2.15115	1.14249	1.62325	1.09349
2_-_140810	6.66927	3.81045	3.79615	2.41108
2_-_20971	80.0359	77.3184	88.755	70.2972
3_-_20615	41.7995	40.5598	40.124	42.1697
16_+_207806	6.99623	4.13454	4.36488	4.78159
17_-_76498	3.8985	3.1326	2.51386	2.2577
3_-_229474	10.8301	9.20186	5.19926	3.79862
1_-_109346	2.80952	2.73098	3.1399	3.372
X_+_237175	1.80157	2.01099	2.6434	5.60197
15_+_266632	5.79258	5.88187	4.30766	3.97551
15_-_105827	1.22122	2.3623	1.23135	1.4771
4_-_230657	12.8378	11.5639	12.3471	7.35855
12_+_104884	9.81964	7.51817	8.11758	14.6257
8_-_17125	11.6664	10.8971	10.2965	12.3444
18_-_80718	3.72141	2.03541	5.87951	3.77741
3_-_67161	3.75549	2.55765	3.527	2.23293
11_-_20425	13.1063	6.92677	7.7969	8.72412
19_-_57753	7.61582	7.46372	6.11157	6.71578
2_+_241452	8.99027	3.96535	2.34668	2.044
8_-_244585	3.11107	2.02701	1.27738	2.29663
3_+_70560	3.78986	3.17371	2.66934	1.81396
9_-_22771	2.80264	1.9693	4.04594	1.43899
6_+_11517	6.23574	15.9208	6.83509	3.62628
18_-_114615	3.96185	2.20265	2.1097	2.31048
11_+_21385	2.00089	1.7361	1.26895	1.61714
7_-_243813	2.21668	2.65205	1.99889	3.11632
13_-_83924	21.7425	21.9668	15.6081	16.3886
2_-_320554	15.0964	7.73799	5.91973	2.84985
11_-_30951	1.29385	1.54423	1.47175	1.42385
11_-_66628	9.06396	8.31827	9.48909	9.58146
5_-_211006	5.83681	5.06755	3.16459	2.2381
1_-_213056	6.4571	4.89175	3.94696	2.36813
2_-_209361	2.66796	2.12901	3.05858	4.09988
18_-_225659	10.7955	4.7808	4.21042	2.43208
7_+_233876	11.6694	7.17864	6.69233	4.06035
11_-_217340	5.31449	4.05101	2.57482	1.69853
7_-_338354	5.19724	3.61252	2.20884	2.94733
X_-_407786	7.86698	4.32528	2.35881	2.25789
13_+_382793	7.25366	4.99869	5.17304	5.13938
17_+_72106	4.79177	5.28405	5.53562	8.22023
13_+_16468	3.80383	2.62685	1.65733	2.11929
13_-_77041	6.92908	8.10657	6.1316	5.37299
2_+_228866	14.1189	13.2581	13.3312	14.6555
10_-_432442	5.04378	4.45698	4.74348	5.70962
6_+_101358	9.08492	6.19689	4.20374	4.87362
11_+_319822	4.89781	1.85199	2.93682	2.73914
14_+_319955	6.61073	3.91323	2.63795	2.32117
4_+_230162	2.4436	2.09513	1.42775	1.13611
6_+_114142	4.2586	6.74144	5.36612	2.52192
11_-_192651	1.63662	1.85056	2.02015	2.41803
9_-_244871	5.50729	4.66895	3.99309	4.10348
13_+_14238	3.50094	5.8294	5.11227	4.89372
1_-_108000	8.10147	3.70967	2.54481	1.96155
6_-_74253	1.02886	1.52817	1.3563	1.1655
19_-_67590	2.67911	2.62754	2.20555	2.56759
2_+_208967	2.18573	1.51681	1.83969	2.37555
17_+_224598	2.68135	4.31141	3.22047	2.1934
8_-_22335	75.8001	70.476	83.578	66.1815
3_+_71934	6.16851	5.58094	7.29444	5.86143
2_+_71198	2.48161	4.31419	6.04842	3.54504
19_+_332397	3.94611	2.15754	2.37091	1.33866
2_-_435684	4.83483	7.50715	10.2194	11.936
3_-_207175	6.39165	9.8386	21.4293	20.906
7_-_67230	3.01781	1.60795	1.98251	2.81127
5_-_140887	3.32937	2.47672	2.05847	2.08864
5_+_17766	7.77311	5.19706	6.21068	5.41612
18_+_381175	2.26776	4.72312	9.56923	10.9297
10_+_216274	3.22397	2.25957	1.71598	1.08126
9_+_234889	26.0927	4.51448	4.15176	3.53644
X_+_213438	26.4198	23.2885	15.0792	6.94679
5_-_72151	40.5594	40.7327	48.239	37.0848
5_-_74239	4.93419	3.54754	4.7417	3.80454
11_+_19062	4.40871	5.49332	4.92992	6.15666
5_+_14400	7.18602	4.28864	4.70661	3.54511
12_+_104871	2.70226	2.27239	2.677	2.37532
19_-_226090	17.9617	9.52819	7.14233	5.24546
14_+_66082	4.54945	3.94405	2.71291	2.43901
2_-_12908	14.7578	13.864	9.96944	9.85898
X_+_18846	6.43981	5.15885	4.32681	4.38033
18_-_328949	7.0567	6.10294	2.4438	2.38341
2_-_67121	8.35385	3.45896	2.17968	1.36668
13_-_238673	16.259	8.84619	5.77245	2.91097
10_+_19075	21.175	8.31446	8.459	5.46047
2_-_71586	1.58651	6.85013	2.53607	3.08416
2_+_51869	13.4581	5.80117	3.83988	1.72814
19_+_15201	33.8122	11.4467	6.71221	2.14132
3_-_229473	3.65197	1.64166	1.87132	1.5237
5_+_67902	13.8307	10.849	9.95145	10.5605
2_+_227674	5.41096	4.11534	3.7588	2.17193
X_+_18700	7.99386	4.50117	4.4816	2.72959
13_+_67252	9.44508	6.83944	4.35337	4.36473
14_-_28113	10.6955	6.77023	7.13008	4.16381
13_-_268697	64.3992	28.7784	25.3692	7.86387
11_+_13385	19.6315	21.3373	30.0869	24.3807
6_-_17119	1.48747	2.55407	1.75783	1.90777
9_-_110350	2.40011	2.72022	2.38308	3.967
10_+_71721	1.21884	2.79875	2.15679	3.75673
17_-_74762	5.43291	3.25261	3.62005	4.16762
14_+_23955	3.4858	2.84183	2.58406	1.93588
3_-_78266	10.0384	9.70994	7.09434	4.41903
13_-_212281	2.31881	3.2825	1.60966	1.05703
13_+_17260	1.78075	1.70335	2.63133	4.61115
7_-_232879	4.21138	3.29987	3.20302	3.79036
15_-_18162	2.60579	8.45064	4.26367	3.71468
9_-_19340	1.62218	2.91903	2.69398	4.31063
6_-_101240	5.87858	5.36104	4.66411	6.20802
12_-_112407	1.31339	2.16787	2.602	1.98515
9_-_55981	8.99001	7.35734	5.00915	6.98653
14_+_16188	11.2012	16.6067	21.0489	31.6604
7_+_18553	11.8851	17.6687	5.7482	7.22999
5_-_231912	9.67744	6.92512	4.72866	6.17384
11_+_327942	8.65086	6.32795	8.0615	8.02956
9_-_214345	9.27502	5.08296	4.98683	5.40417
19_+_240665	2.28047	1.28105	1.14476	1.34782
14_+_13655	3.77244	4.4687	2.52185	2.97089
7_-_101604	1.61348	2.38878	1.70756	2.1538
19_+_56464	3.67053	6.71624	10.7565	21.6553
9_+_22619	3.69827	5.06728	4.16525	3.00919
4_-_381560	3.93961	2.86769	2.38217	3.16892
5_-_84652	12.3057	9.7708	8.82895	7.39815
4_+_230661	5.92488	7.65779	5.21361	7.95779
5_-_384309	12.6684	9.86516	4.57825	5.60584
17_+_474156	4.59296	3.52808	3.06208	2.9915
18_-_240261	3.01893	1.62183	1.94832	2.68127
7_-_320100	6.37024	2.84595	2.92453	2.45467
5_+_18669	6.61223	3.05925	3.42289	1.77634
1_+_21749	11.3325	5.43698	5.56781	12.4114
13_+_13361	5.72284	2.21932	2.27164	1.50355
18_-_67158	1.98646	2.25252	1.67852	1.83992
2_-_18779	2.47494	2.19077	2.15586	2.97727
8_-_83436	4.50286	3.05664	3.67516	4.14394
17_+_18712	6.83069	5.57031	10.4874	5.27941
8_+_244654	9.53752	8.39119	3.62489	5.16711
13_-_70484	1.47136	2.15861	2.03763	1.65004
4_+_68350	5.61818	8.5576	5.45407	3.91694
2_-_73338	5.04154	2.5462	2.27008	2.07242
11_+_52892	5.4607	5.93618	3.50618	3.0574
5_+_27368	6.97192	7.34056	4.35805	5.15031
8_+_244329	7.59463	3.85999	4.34735	3.41537
14_-_66897	9.56427	6.21052	4.7595	4.17165
7_+_381903	31.5155	22.9153	13.3992	12.5407
6_-_21679	4.25217	2.119	1.50257	1.93824
6_+_108960	35.0276	40.7765	36.1853	20.4636
2_-_20878	45.094	19.1534	23.3332	8.5725
9_+_68026	54.0274	21.7604	22.8587	8.38915
2_+_72630	2.75421	3.92963	3.58245	3.98576
6_-_320560	7.14505	3.05856	4.91491	4.76175
7_-_101809	7.89859	5.89137	5.99491	4.51932
X_+_66724	3.86783	2.98302	1.75243	1.36093
4_+_16351	3.37294	1.90767	1.22766	3.15702
5_+_67848	5.09315	5.6387	5.34551	5.6704
11_-_14615	24.2042	12.1637	9.0984	6.44639
9_-_12442	19.089	15.593	18.7965	8.02896
15_-_26404	20.704	20.5214	24.3446	27.4702
6_-_259302	4.83974	2.90308	2.55068	3.52055
6_+_101095	5.83834	4.90104	3.57739	3.06455
8_-_13617	4.74125	3.0321	2.89861	4.07864
7_+_243867	4.18064	3.52515	3.33786	6.1919
1_+_240756	4.6799	4.94085	5.2004	3.65932
3_+_74245	3.68587	4.1023	4.88656	3.51589
3_+_229675	4.46294	3.6312	3.91977	2.65474
6_-_209032	3.35075	1.69968	1.38385	2.11121
4_-_209212	5.33228	2.37979	2.7795	2.72566
X_-_14933	4.84006	3.40428	4.79768	1.84845
5_+_330222	5.06211	4.25481	1.70688	1.96771
10_-_14051	3.27383	5.55635	4.75685	4.96476
1_-_15064	3.35365	9.72115	7.46879	6.54864
1_+_74019	3.99473	3.66665	4.19437	4.91531
8_-_234362	22.5131	19.5713	14.2125	14.5612
13_+_80898	16.328	19.9682	24.4977	30.5382
2_+_16401	6.82499	3.79749	4.00002	1.97326
8_-_56749	5.9845	4.82552	6.44555	3.92522
17_-_72016	6.76121	3.07323	3.31754	2.98946
19_-_16319	31.7934	14.5578	17.99	10.9684
2_+_19361	11.1864	5.71617	3.53489	2.81344
19_-_54447	5.15611	5.15636	2.99794	3.99433
X_+_54645	9.37095	10.1314	12.9302	11.5766
12_-_66174	5.36006	5.21796	9.59437	23.087
14_+_20855	4.02508	1.26681	3.97033	2.96604
4_-_66454	5.08059	5.31458	4.50236	8.57787
5_-_243043	3.31744	1.16775	1.82093	2.6564
6_+_269800	18.8047	17.9668	10.1634	9.63121
2_-_228980	13.3749	10.1872	7.87417	9.3363
X_-_171170	6.57826	4.47977	3.44967	1.39311
17_+_27221	16.0115	6.97074	7.22619	3.66964
7_-_232946	3.93456	5.61337	11.3694	10.6313
7_-_75660	6.62691	6.35401	13.8549	28.4967
6_-_29807	1.68686	2.0214	2.05647	1.84768
12_+_72805	2.17865	1.46554	1.95883	2.00589
10_+_17299	7.73142	7.0671	7.94959	8.4943
2_+_227683	4.64265	4.36868	3.75774	3.434
17_-_70083	12.404	12.8578	19.5203	21.3479
13_-_18740	5.35498	8.36928	10.4437	13.8426
9_-_235542	7.77732	4.40983	3.91108	2.74616
1_-_214895	12.5737	10.3237	10.8502	9.93936
10_+_68114	12.8632	9.21465	11.3913	9.805
9_+_18577	12.8389	5.89544	2.74512	2.81648
15_-_223870	14.4818	8.26576	5.49804	4.83417
9_-_68743	62.9471	27.525	18.0361	5.32827
17_-_20230	2.45547	2.35309	1.95912	2.11237
12_+_13435	6.23269	3.38929	5.05535	6.39759
16_+_71911	11.2902	9.69719	7.95937	4.01377
9_-_235345	1.03161	1.81536	1.50316	4.14596
4_-_72754	6.29889	6.97752	7.04897	17.7675
4_-_72181	4.69711	6.66543	5.43054	4.44092
7_-_72723	3.49083	3.99618	2.74034	2.78605
9_+_212531	6.79542	3.82419	4.87102	3.8864
2_-_66934	9.61879	6.25568	5.8602	3.34792
10_+_208266	17.0944	10.1504	9.50943	6.95079
11_+_17534	34.4378	54.1239	62.5571	76.0012
11_+_52712	2.34183	1.87926	2.19182	5.88978
10_-_74732	2.25547	5.04629	5.38276	3.13346
9_-_11796	6.19659	6.84413	5.93807	6.52929
17_-_76781	5.72821	3.25481	1.70763	3.0253
5_+_66768	5.34902	4.61755	5.82411	6.04874
9_-_117149	10.8899	10.7463	11.3837	6.91012
5_+_231042	7.66558	6.33232	5.82955	5.34281
8_+_70823	10.6547	5.1377	5.29166	7.22358
7_+_243983	15.8749	12.7113	11.5411	10.7207
11_-_68145	4.81172	2.41768	1.79217	1.03539
9_-_234912	4.12301	6.37991	5.84042	3.6695
1_+_74229	4.06477	2.98171	2.23146	3.23455
19_-_14297	6.46986	5.06194	6.5261	4.43553
8_+_70885	14.5977	11.016	9.51817	6.75885
9_-_22688	10.2294	7.66736	4.5795	2.79692
7_-_71151	10.5656	4.85221	3.58029	1.55719
7_-_14183	60.2483	39.1147	39.7988	36.5116
19_-_226144	15.9268	11.4572	11.2505	11.5463
2_+_71878	17.7899	8.64982	12.1915	6.19426
12_-_66109	2.70046	1.39296	1.99743	2.99095
7_+_22693	1.03015	1.38882	1.89475	3.53087
7_-_232943	2.46021	3.60658	4.83355	4.95839
14_-_239099	1.318	1.43436	1.69111	1.37478
8_-_64933	3.36652	2.37977	2.09974	3.80664
6_-_13807	3.78965	5.39413	8.58895	7.29119
16_-_114604	6.8813	3.19063	2.28351	1.42032
12_-_12499	6.56257	6.94107	5.45876	3.49256
11_-_78943	3.24985	2.31209	2.5606	2.64194
9_-_270156	6.34682	6.09147	5.42336	4.67331
11_-_78912	5.6893	4.33732	3.0005	2.91982
2_-_17076	15.4893	5.66045	4.11289	2.63349
7_+_11982	10.1158	9.48712	4.44603	3.62037
12_+_217558	18.924	9.86603	4.10033	2.70369
7_+_233902	11.5938	13.0711	13.5791	18.2177
9_-_69536	1.95089	2.57297	1.41793	5.416
19_-_73442	2.02768	4.19231	2.81753	2.71556
X_-_11605	4.34951	12.9061	18.6622	10.6177
7_-_67417	4.21938	4.22525	2.26498	2.33232
9_+_72507	18.8389	12.9385	7.93526	7.49453
3_-_213054	9.19227	5.93321	6.33304	5.95869
2_+_15437	7.72184	4.8753	7.22001	7.64727
10_-_103468	22.3794	13.8752	12.5223	7.45053
7_-_54122	9.30717	5.14663	3.90233	4.43438
18_+_114663	4.99168	3.28105	2.7132	3.13622
6_-_213233	2.01405	2.8331	2.25905	3.26295
X_+_53332	4.72996	5.04965	4.25835	4.66596
5_-_243362	10.0226	8.87885	5.7631	4.25125
16_-_71063	3.36876	3.28988	5.12383	3.2261
10_+_66757	5.70464	7.04768	5.93755	3.26787
7_+_20841	10.0662	6.83895	5.83094	4.98213
10_+_56533	9.27799	2.67475	4.32449	2.72038
6_+_67088	6.51773	4.46421	4.50735	6.49718
16_-_67102	9.89387	8.55122	6.74183	5.99619
9_+_67667	4.98835	4.83831	2.89462	2.04021
11_-_12291	3.27458	5.11447	5.80997	10.1658
8_-_75796	4.16623	1.79934	1.25371	1.14031
1_-_74577	6.89767	5.18663	4.83559	6.58157
15_+_109270	11.4494	10.5334	13.4045	11.3623
4_+_16348	5.50914	3.6545	2.59584	1.98263
9_-_102423	4.24611	4.03412	2.21619	1.61207
2_+_140484	17.4149	15.1927	10.9141	9.26073
10_-_66932	7.8268	6.41002	5.92614	4.06148
11_-_217265	10.4569	4.58208	1.90071	1.31537
1_+_67534	11.5905	7.81448	5.39658	3.09048
4_+_52076	8.05823	10.318	7.2152	6.07835
1_+_22782	4.96891	6.84944	4.5582	1.89724
7_+_14366	3.12205	4.31229	5.74335	4.91541
6_+_74525	5.54425	5.29837	4.98228	4.47471
16_+_50505	7.47879	6.45504	7.03289	3.82389
7_-_76375	7.71001	6.21574	4.63557	7.60458
14_+_219094	5.08273	3.02768	3.43483	2.76773
12_-_217666	6.50158	3.65566	6.34682	2.85888
4_+_14211	34.8512	15.7309	10.7223	3.85821
5_-_252972	5.67564	5.90795	3.94246	4.01627
19_-_67689	1.23346	2.64501	4.19101	7.16215
5_-_215707	2.53284	2.58739	2.48686	2.11113
8_-_102294	1.29285	2.2975	2.46858	2.80688
2_-_228859	8.17122	6.13456	4.21488	3.55572
1_-_208727	7.02993	6.42155	6.50174	7.23308
5_+_231871	7.02696	7.31881	7.65157	7.58949
1_+_76816	4.30102	3.85564	5.54998	9.04735
3_+_108097	18.1328	7.06489	3.3229	4.34576
1_+_77065	14.9138	9.87777	8.12384	4.77321
9_+_75747	4.94343	8.33738	4.26462	8.36734
2_+_20448	20.2559	24.1381	26.3037	24.8179
19_+_53611	9.68533	9.45249	6.44671	7.66221
17_+_224805	4.54335	4.47481	5.77705	4.53297
1_-_70375	5.74523	2.65169	1.31915	1.51409
2_-_192166	2.13584	4.21231	7.2658	5.46922
4_-_230767	4.76257	3.106	4.55843	3.58302
15_-_223649	3.41885	6.39983	7.18533	8.99821
16_-_13837	9.02539	10.4339	6.21724	6.66874
8_-_74568	5.41957	14.5456	14.7726	16.8619
9_+_66595	7.09583	4.44565	4.11316	3.5164
3_-_12428	98.8467	36.3095	36.0046	26.0603
15_-_319953	8.35609	11.6875	12.3619	12.3124
11_+_12799	4.82976	4.47787	6.75548	8.63577
17_-_106794	8.14721	10.5269	12.2514	8.75675
12_-_109181	23.4531	15.4186	9.64271	7.31395
6_-_72306	10.7841	9.82462	7.47558	6.18426
15_-_223753	4.84251	4.23574	3.62137	3.78196
7_-_101513	10.2105	10.6608	10.8701	32.3948
3_-_229488	1.87925	2.70741	1.98583	2.38553
11_-_18559	2.27031	1.51213	1.79971	1.9875
12_+_16570	7.67453	6.41755	5.95082	8.97902
5_+_71382	3.48543	3.23353	2.1799	2.07846
3_-_329679	6.69248	9.94797	12.5227	4.69548
8_-_66653	5.19798	5.05474	5.54525	6.51706
2_-_227580	5.86887	9.35548	5.67094	4.29766
1_+_66950	5.87352	4.53234	4.13572	4.45377
9_-_333433	10.3482	10.2621	8.19668	6.35496
10_-_215789	5.86976	5.97474	3.45312	3.60306
5_+_69663	9.69309	5.55221	2.64185	4.06205
15_-_20442	15.282	12.9992	12.3703	13.1965
7_-_67967	8.83969	3.86831	5.75936	4.55497
7_+_20475	2.15977	2.34461	3.20478	4.37219
19_-_240613	11.5083	8.61769	8.86329	7.22816
5_-_242860	2.84983	4.53075	3.89347	4.62938
1_-_77264	8.25144	7.17594	2.84345	1.80601
4_+_69908	19.8936	6.37325	10.1305	11.6008
12_+_52592	26.4515	22.3253	23.4706	17.1585
6_-_54160	16.1938	19.1767	17.0591	17.7381
1_+_66821	6.97088	6.12008	7.46856	6.86874
9_-_244891	4.12234	4.13029	2.13692	2.71003
3_+_99167	4.01339	2.53152	4.58484	4.22683
19_+_15958	4.87946	6.46768	6.37951	5.6782
3_+_229055	9.16891	7.32004	4.62558	3.4622
12_+_22367	9.02632	5.42399	5.11623	5.07422
9_-_66706	4.17936	7.39856	9.77408	14.2405
2_-_227622	3.8816	8.03408	11.0299	15.647
3_-_107869	2.5194	8.12059	8.90416	5.23251
9_+_93697	5.14756	3.27058	2.73618	2.03267
18_-_77422	3.87368	3.60674	3.98958	5.02566
10_-_93759	21.6057	20.4884	18.3708	7.27823
1_+_68833	133.122	133.32	160.504	105.49
3_+_271970	6.11487	5.37533	4.56499	7.60132
7_-_13593	9.19434	14.659	17.212	20.7101
8_+_109151	19.0033	14.8283	12.4609	15.2097
12_-_76357	8.75674	8.15208	8.41242	7.35366
13_-_17702	9.72486	2.30198	4.61916	6.23056
9_-_77591	12.7987	12.0215	11.9799	8.57204
17_+_193796	3.71067	4.21699	3.8324	4.38688
9_+_102607	13.2613	12.5676	7.09692	7.44851
11_-_104479	5.27157	4.64587	4.91179	2.53138
18_+_70417	5.3676	13.062	7.10233	2.23069
14_-_246710	1.87432	1.70422	1.2822	1.80643
8_+_234358	3.78402	4.6224	2.82239	2.13897
2_-_77766	6.98925	6.53655	4.01178	7.74226
4_+_140500	13.7711	10.0801	8.74407	6.65672
X_+_59024	11.1428	7.94407	9.09914	33.2111
13_+_108154	11.652	10.5313	8.13396	4.68571
5_-_246293	2.09038	1.76681	1.40849	3.68258
2_+_64899	3.32749	5.70816	4.80789	3.36222
13_+_268706	3.94493	3.74342	3.39779	3.37425
19_-_71617	7.18922	7.14468	7.33754	6.78308
2_-_320799	4.76322	4.82987	2.17665	1.37648
10_+_70297	6.33024	8.17745	9.67508	8.05112
7_-_14082	3.74604	3.15349	2.53934	2.39865
7_+_233276	6.09557	4.32988	3.10451	1.60762
12_+_69480	5.61804	2.17178	4.46722	3.6656
13_+_105246	9.91098	9.12991	10.7797	11.3416
11_+_67862	4.08983	3.75537	5.25638	7.27932
6_+_20019	21.8789	12.9465	8.04668	4.48756
11_-_72290	5.13377	2.53612	2.73496	1.25303
19_+_76073	6.00729	6.89814	8.51839	4.1903
14_+_629059	5.06192	3.72057	5.51498	7.05396
3_-_269473	3.5632	4.75347	5.05607	3.91681
11_+_19401	14.6816	16.6557	12.45	12.7023
X_-_18679	5.25461	4.23123	3.29534	2.85407
14_-_57258	63.1427	47.7373	28.6765	24.1065
4_+_230837	1.42087	2.19588	1.75728	2.82558
18_+_71373	1.25675	1.40057	1.23549	2.20238
6_-_65967	5.92684	4.40728	5.13661	3.87569
11_+_268469	8.38165	9.84301	9.88554	11.6954
4_+_320541	6.0094	5.62571	3.31689	1.65908
4_-_68268	11.0945	7.41168	6.09878	3.88604
17_+_70536	5.11304	2.67033	3.42269	3.58825
10_-_66399	20.3644	20.527	27.844	25.8032
11_+_245944	19.9846	12.5169	7.79096	5.3924
2_+_277396	7.51316	2.03323	1.82328	1.13988
5_-_269113	19.2297	13.8719	12.993	9.89093
X_-_15159	18.9659	22.3454	23.5779	14.761
9_+_17535	21.1224	10.5205	4.56506	3.791
11_+_320534	6.51647	7.331	6.28164	4.1687
7_-_17921	3.13594	6.73306	6.00351	9.69027
10_+_78334	3.13086	2.57758	3.95057	3.87908
12_-_66689	8.73216	4.722	3.96912	2.43359
1_-_69726	11.4652	12.6338	6.06814	9.4653
4_-_242509	5.58585	10.6773	9.50859	8.61175
18_-_108052	4.33425	2.12609	2.62283	3.32647
7_-_11778	4.29212	3.93495	3.03978	3.45406
2_+_76969	3.27601	1.26165	1.98887	2.81426
13_-_105372	14.3116	12.5252	10.2254	6.23206
6_-_232334	18.9702	17.9374	12.1684	13.9295
14_+_16391	9.23505	24.7469	14.7862	18.927
10_+_73910	1.8017	1.47868	1.9055	1.70147
1_-_66447	19.1119	11.4909	16.6097	33.7334
11_-_212627	9.67541	6.72877	5.8272	6.29117
7_-_70420	15.5674	9.40164	13.9477	13.0122
1_-_226525	16.0537	7.89166	3.63755	4.36541
5_-_207704	6.60371	5.52562	7.48619	5.26671
5_+_140780	12.5307	9.95919	15.4153	8.17808
9_-_66202	5.18132	7.02224	8.52033	8.97417
8_-_330788	9.32634	7.31743	5.34234	7.66919
17_-_56716	5.75518	5.39705	4.31564	3.55291
8_-_319481	4.64079	4.55042	3.57756	3.65621
18_+_69241	31.3112	28.5526	37.7109	33.4538
3_+_78908	6.51253	4.05807	6.39841	10.0889
11_-_68044	3.6319	4.32188	4.24974	6.37248
15_-_69906	16.3932	12.7773	8.3477	8.49106
13_+_66254	13.666	10.0966	6.50149	3.97565
6_+_14793	26.4666	22.4226	30.0003	9.92256
13_+_20723	1.9908	5.07253	4.62663	5.12455
12_-_217695	6.41147	10.1715	9.58286	8.98447
2_+_16181	8.37608	14.3602	15.6265	18.6644
17_+_100043468	7.60361	4.23255	4.57407	3.22878
3_+_208691	9.63393	8.36834	4.86828	2.8112
11_+_13866	10.6924	6.18827	5.11223	4.73262
4_+_68016	3.95431	2.9591	3.89305	4.07929
17_+_224585	7.44203	6.03877	6.96568	4.96817
11_+_13591	13.1186	17.7585	10.9191	13.8603
5_+_79565	1.56911	4.47442	4.25757	4.98303
11_+_15417	24.1702	23.2165	18.7174	14.9297
17_-_380608	5.23675	6.9494	6.51517	4.77701
2_+_98910	6.21484	5.18682	2.34375	1.66315
10_-_56371	21.4156	17.9517	24.3106	20.899
17_-_72238	9.1728	7.16708	4.03645	4.14324
4_-_320713	7.61723	9.7216	7.43043	4.60002
15_-_69354	39.03	21.848	9.59721	2.2058
19_+_68852	2.46065	19.7469	21.0142	64.7258
5_-_67661	4.11409	4.68611	2.93292	3.11177
12_+_73828	8.01462	10.5951	28.0281	38.0795
7_+_104175	2.08032	2.32985	1.80618	2.39116
8_-_270076	4.61043	4.70948	6.16109	6.51579
8_-_74513	9.29806	5.29273	9.53175	4.19662
16_-_106338	4.4537	4.30454	2.81412	2.36654
3_-_67549	8.16686	5.98287	5.62092	4.00683
19_-_72502	5.08129	2.19162	2.60934	1.97155
1_-_69399	8.64998	8.19112	4.368	3.73983
3_-_12167	5.37899	6.89384	4.86519	3.23061
5_-_215114	13.5339	8.73151	5.5854	7.31195
6_-_16439	4.38447	4.31295	4.02165	4.61257
7_+_434204	2.46137	1.97553	2.85282	2.49353
16_-_27886	5.36065	5.71277	5.83361	7.51423
6_+_101187	3.76339	5.09254	2.81962	2.66146
X_-_56078	3.88571	5.03439	5.70105	6.85
9_-_74498	4.26049	4.27045	3.76714	5.32191
18_+_68046	2.25842	2.23015	2.96561	2.68688
4_+_116940	13.46	11.0982	10.2977	8.78325
7_-_108841	12.9405	9.7471	6.34318	4.13353
3_-_26377	2.24775	2.96719	3.32169	3.93535
17_+_23984	4.86393	5.8016	11.4142	4.90798
9_-_114713	11.3093	8.35796	9.27221	6.65633
10_-_380664	8.92086	8.5023	7.83253	4.768
13_-_218461	13.0888	15.5296	16.8391	19.1822
2_-_228482	22.4041	10.2295	9.70574	4.88773
3_+_20661	5.67623	7.97536	15.8272	8.04013
9_-_212943	7.16465	10.8615	5.93931	6.27362
4_+_68053	2.24497	2.05086	1.30699	1.30924
12_+_68055	4.44357	4.32168	5.105	5.64789
1_-_226562	43.2253	25.4471	9.96833	7.85895
3_+_320024	4.94392	5.93589	3.63923	2.44448
7_+_233056	3.10986	2.22935	1.70036	2.21011
15_-_328580	12.5012	8.57521	10.2655	8.65913
5_+_52064	8.21261	7.77713	7.8771	8.79686
11_-_448850	12.8452	6.52219	10.2364	8.65264
3_-_67553	11.3981	4.60398	3.95472	3.63543
11_+_18015	22.9004	16.6252	10.5213	6.94235
19_+_74411	2.12807	2.24801	2.53816	2.79669
18_-_50771	17.4272	16.3691	14.5815	11.154
18_-_240442	11.7031	8.55868	12.6019	12.7244
X_-_54651	1.55816	1.38931	1.18789	1.55082
12_+_23967	14.0158	21.0387	17.3566	36.2613
5_-_100978	12.5025	15.0782	10.0401	7.23532
7_-_29877	5.47451	4.65824	3.3184	3.26683
1_+_67769	5.24051	4.46557	2.65353	3.35138
7_-_269997	3.63028	4.16734	3.02108	1.98983
17_-_193838	21.9883	19.9385	13.2067	12.8206
1_-_71592	7.296	8.74794	7.01892	5.71582
7_+_75985	8.39837	5.51791	9.36004	7.49148
11_-_67480	7.79626	9.01433	9.14973	8.14467
4_+_53614	7.64981	8.05613	7.52248	14.9909
9_-_74769	6.60338	4.91612	2.98201	1.15294
18_+_22694	5.19347	3.88787	3.29758	2.62546
14_-_380916	5.11423	2.98496	2.15371	3.54902
4_-_67422	10.2905	10.4655	7.95532	9.35925
6_+_14461	6.96066	4.10755	3.90884	3.47263
3_+_214804	5.85196	9.57039	5.86035	3.59647
16_+_224171	27.7521	14.79	8.46339	4.17696
X_+_76219	1.45398	1.74443	1.42978	3.40645
7_+_170460	2.70134	4.96	3.94755	7.00722
11_+_75219	4.08221	5.96673	5.2671	5.16214
10_-_103199	11.2836	11.78	11.2533	10.3721
12_+_217473	10.993	8.33944	11.5615	12.7859
4_-_230696	9.97352	10.7086	7.90858	7.13843
5_+_330177	20.3562	27.5797	40.8024	46.0918
1_+_212679	6.47691	4.10736	1.10016	1.58686
10_+_209462	4.50665	3.69528	4.74554	4.44213
3_-_67035	88.5515	52.7655	55.6314	46.3141
3_-_13609	14.5741	3.76606	5.41181	3.14127
12_+_14009	1.91209	1.95532	1.71681	1.88251
2_+_96957	3.07878	4.38064	3.56519	2.72857
4_-_230801	1.77646	2.92878	4.21304	2.89379
11_+_217030	3.36111	3.23433	2.81112	1.67284
4_+_242736	6.6215	6.27482	5.10432	5.83248
7_-_74349	9.12226	8.33424	5.39668	5.96616
18_-_77805	8.26763	9.33507	9.35817	5.41263
14_+_73068	7.96555	7.46187	6.1685	4.39924
7_-_67224	16.217	17.198	17.3331	14.9397
10_-_117600	7.38122	4.4618	4.60722	5.03951
5_+_76792	4.60201	6.88838	4.55213	3.24252
10_+_30045	2.62921	2.63286	3.51375	4.14997
18_-_212163	11.6299	10.2963	6.34626	6.80538
11_-_21763	7.02471	7.38185	7.5994	11.2717
5_-_108099	23.2735	17.1012	17.0124	11.6698
9_+_14629	19.4919	12.6232	11.3272	7.2927
9_-_17130	16.835	4.86844	5.70035	10.9742
13_+_14957	1.55154	1.70572	2.07809	1.80172
6_-_101142	6.52966	4.63181	4.49189	4.00767
9_-_215474	5.88293	2.6233	2.17262	1.94372
X_-_11306	6.43796	3.99826	2.65804	1.48628
8_+_270086	14.5908	11.395	4.83671	5.12254
19_+_107373	68.3076	31.4507	42.7202	20.839
8_+_22751	2.23799	2.1676	2.71173	3.46709
1_-_56210	5.46827	7.54241	6.48445	3.1365
9_+_270210	6.31808	5.37368	6.26896	8.96364
7_-_244219	7.19094	5.06579	4.9736	4.22974
10_+_66686	6.04537	2.55187	2.94144	2.21338
12_-_109929	7.00389	4.91973	5.81936	7.93886
19_-_18797	28.6955	19.089	14.1638	14.1774
2_-_18830	6.02742	8.25135	14.5291	40.0751
8_+_70359	5.12665	5.77634	5.25467	6.27995
11_+_77097	5.15319	4.48104	4.79633	3.88286
9_-_140630	21.5155	17.9234	9.38572	7.55535
2_-_329504	4.85455	5.34213	3.49888	4.926
X_+_22289	7.53436	6.48266	5.84809	7.81862
14_+_69008	15.1499	12.5305	11.4526	8.18893
16_-_66690	7.21283	4.16471	3.49316	3.58919
14_+_108811	1.7532	2.37426	4.10936	8.37787
16_+_77626	16.4622	10.1425	5.54356	6.62928
17_-_57773	7.13427	6.34953	5.84365	6.15182
14_+_218885	8.66449	6.91919	7.64541	5.1706
17_+_11307	2.65667	1.58855	1.1712	1.52237
11_+_52915	9.55251	7.92646	6.00592	5.45357
6_+_69786	10.833	10.1038	10.9852	15.5076
3_-_18583	9.83192	7.84994	5.52999	3.51777
X_+_69656	2.45632	4.59723	6.63843	7.30726
1_+_65247	4.74313	4.59647	3.52499	9.29688
1_-_227334	8.90419	7.51021	3.25342	2.39182
6_+_67442	9.53282	7.80523	7.35626	7.24811
4_-_230073	10.7808	24.7919	13.5232	17.1118
9_-_28135	8.54487	6.24495	5.69784	7.88691
11_-_140721	4.44826	3.15515	1.85597	2.18636
11_+_217026	8.66164	6.71998	4.10831	3.88479
3_-_72175	2.60506	2.06483	3.08483	2.68268
10_+_64453	21.6226	17.2385	13.6308	7.19365
16_-_224170	15.8099	10.9585	7.8555	4.0746
9_-_56807	8.36183	11.2929	10.7656	10.0548
5_+_231279	4.8292	4.37151	4.99384	3.45948
5_-_12589	11.291	7.78514	6.92941	7.99712
12_+_75302	11.4044	8.07477	4.76946	2.50815
5_-_55982	15.149	8.43418	4.81931	2.64765
10_-_17997	17.7743	9.20506	7.67252	5.44652
3_+_229445	2.07717	5.54084	5.04332	7.22456
12_-_73086	2.56621	1.4429	1.33038	1.3956
5_+_108151	2.86888	6.98932	4.46073	3.53272
4_+_76608	3.97225	5.09742	6.29736	4.49982
9_+_56542	5.64333	6.92899	4.63823	3.27988
4_-_100017	11.5202	8.74608	8.17235	10.0499
9_-_19286	2.97436	4.84248	6.72062	18.1032
3_+_70892	5.58035	3.9887	2.7073	1.9669
5_+_11781	7.53968	7.67035	7.59493	6.05589
8_+_16363	2.98295	2.64146	1.69653	2.90725
2_-_227731	11.4325	7.73799	7.01229	6.90031
4_+_70052	6.34749	3.97536	2.53419	2.62244
11_+_217125	2.63329	4.4326	5.48171	6.43522
4_+_213649	3.72795	2.80708	3.07343	4.76877
2_-_69113	12.4085	13.8423	18.7444	18.8266
1_+_213464	16.4602	12.3321	9.3762	7.24447
19_+_226151	12.8403	7.42116	6.44412	5.19584
12_-_83602	16.3828	15.8894	18.3248	9.06351
14_-_219105	25.1789	19.6994	13.7304	8.85267
3_-_84505	10.5082	6.57491	5.75616	3.53623
2_+_227615	10.8589	13.6107	20.9306	18.1049
10_-_208228	36.6634	39.954	35.9295	30.2238
19_+_319594	7.93926	6.9746	4.47211	4.13987
11_+_66983	3.93986	4.29561	3.91544	4.39596
2_+_66296	12.6764	12.3888	9.79623	8.51551
11_-_19360	13.9845	8.10682	6.25019	5.95903
13_-_68732	6.49563	4.64967	7.19815	9.1597
13_+_69577	9.95696	11.7657	10.058	6.43906
9_+_244867	1.1782	3.43883	3.60889	12.8867
2_+_101113	7.98828	8.55704	9.36868	15.2762
7_-_233033	33.451	25.5767	20.282	22.4916
11_+_67178	6.44556	7.67625	12.0196	19.2584
2_+_69372	2.1269	2.01604	1.62522	2.74716
3_+_56742	36.8918	34.2821	43.9958	50.5433
15_+_78834	6.20766	6.43731	4.46685	4.01824
8_+_77733	5.4175	4.33998	3.23714	2.63402
9_-_213550	6.78904	5.91968	5.74984	7.41331
2_+_56357	16.2171	12.0307	14.2378	10.8167
8_+_54352	5.32222	3.24409	4.43926	4.12183
19_-_107094	14.1609	8.18198	4.92225	3.13332
3_+_214048	7.31382	7.5867	6.3054	4.9519
6_-_71720	9.22931	5.48045	7.66451	7.70006
2_+_68201	20.0627	14.8894	22.3955	39.8004
9_+_24059	36.801	11.2715	13.7036	11.4721
5_-_27214	30.448	19.383	18.5041	7.63954
19_+_14283	10.9308	7.72765	4.20386	2.57906
5_+_109305	12.1452	10.4784	15.2565	13.7426
5_-_56873	10.7208	9.39791	5.51462	10.0516
14_-_76338	9.55055	9.78009	8.43158	11.9263
7_-_100043133	1.98036	2.08979	1.43784	2.25471
8_+_330812	9.43746	13.0267	14.7166	14.8782
2_-_22030	10.1575	7.68115	7.54493	9.23358
6_+_73998	8.50864	4.5782	7.71075	4.99327
4_+_17764	3.42868	3.93938	2.78596	3.94818
7_-_233107	10.2967	8.60746	6.15511	6.76064
1_-_71449	6.35273	5.39294	4.718	2.80442
17_+_106628	20.5238	16.6121	19.7258	20.1855
2_+_55935	23.5267	17.1072	9.42503	9.50082
3_+_80732	6.18369	6.13478	4.9154	5.92787
1_-_52392	7.88915	3.58842	5.53257	2.72043
11_-_70422	14.0549	8.48893	5.77749	4.28734
2_-_59038	5.90937	6.35811	8.82679	14.2987
14_+_11843	157.112	177.718	175.091	187.609
17_-_72029	12.947	14.3139	18.4547	16.7886
11_+_71701	20.9226	18.528	16.2944	11.7362
15_+_20683	22.9912	21.7321	29.6178	21.3364
6_-_319801	1.85564	1.73378	1.24832	1.14991
6_+_13990	23.1764	15.426	12.0896	7.27479
16_+_15975	23.6384	20.3155	13.4069	12.7426
10_-_68281	6.25823	5.32472	8.00629	5.65388
12_-_14420	11.0179	9.38445	11.8047	11.6551
18_+_70640	5.68877	3.63569	3.31686	3.52829
11_+_67608	47.9324	45.6244	32.5925	27.8423
5_-_101023	5.72351	6.7658	7.24199	6.58821
10_+_237353	5.11148	4.64954	2.73664	4.1497
6_+_231999	4.15242	4.46426	4.57925	4.82466
17_-_57354	6.87866	4.25782	3.6986	3.15502
1_-_70155	3.7983	2.57321	3.4369	3.91616
8_-_70925	6.33168	5.05241	5.8983	4.29483
18_-_240427	7.82133	10.1732	5.78975	6.41085
2_+_70408	9.84265	9.03454	8.85321	4.45116
10_+_28109	24.5581	20.0605	14.4972	9.40568
4_+_242316	3.15296	10.2473	6.55697	3.70381
14_-_66573	7.29401	10.5067	9.6623	13.4245
17_-_68915	4.21912	3.17528	4.10577	6.21173
18_+_69256	7.16789	6.65539	6.95649	4.68923
10_+_67933	17.6616	14.2981	12.8898	9.4246
8_+_170938	8.15845	9.16306	7.32895	4.70208
19_+_93685	7.49218	9.37165	7.38204	5.5451
10_-_320150	10.1994	8.72976	5.85967	6.29419
6_+_232491	3.19572	2.89933	3.11887	2.64566
11_+_103784	83.7022	96.2429	112.44	79.9351
9_-_76365	10.1529	12.0742	18.0367	18.8944
1_-_212442	9.60828	13.1492	13.6035	12.3788
17_-_215445	13.8625	9.29508	7.30294	8.25245
8_-_234374	22.8707	28.2737	31.2011	23.9571
9_-_83946	13.7839	8.94201	10.9686	11.3426
17_+_268936	11.2546	6.94734	7.13437	8.11733
5_+_56715	16.9826	16.8873	17.1073	16.6171
17_-_21678	17.0556	14.768	13.5218	13.9999
19_-_226075	14.442	9.52209	8.64886	12.8581
7_+_233532	9.84099	8.90474	8.96857	6.67056
16_+_66667	5.98536	4.24278	3.57838	2.57901
X_+_16164	10.6195	12.3595	16.7965	12.8674
7_-_27412	4.68169	2.65159	2.73264	1.70175
15_-_15117	34.1261	11.0447	15.1576	4.72686
10_+_19714	7.48545	5.97671	5.00692	3.94382
5_+_67249	9.57947	9.86708	9.25711	7.88582
4_-_21938	10.0929	7.74657	9.06073	11.1736
9_-_71599	3.92513	2.0494	2.2236	1.61562
18_-_106931	3.35461	2.015	3.58121	4.17165
6_+_109135	9.26249	4.57282	6.03943	6.50831
12_-_246196	10.5053	12.7541	14.4879	10.4933
17_+_58230	44.1419	35.7029	29.7416	26.4663
11_-_75572	3.03247	3.78225	7.63905	7.33908
11_+_72795	24.8354	18.9965	17.0961	13.5225
13_-_23894	10.4419	12.9049	10.2036	10.7338
1_-_16329	4.87325	4.31482	8.09287	6.23579
1_+_26895	14.7095	12.0918	12.8462	13.2403
17_+_224907	7.50858	9.97986	11.4249	9.41973
10_+_69718	8.09388	4.85846	5.22227	2.40835
2_-_16558	4.44136	3.95172	2.61172	2.8094
7_-_100040608	5.51704	5.11044	7.4156	8.93111
5_-_72313	13.2732	8.16767	10.4837	13.1905
11_-_260302	7.50865	2.66682	1.83642	2.34879
15_+_60315	91.0983	98.1204	127.156	145.026
7_-_76179	18.9734	10.107	5.20908	1.73613
2_-_66926	16.0064	14.1229	13.3083	10.3284
3_+_17380	9.28457	9.26435	6.20307	5.95086
11_+_217124	12.7843	12.2424	11.8342	12.4866
2_-_67532	4.29797	3.8044	3.82281	3.6734
4_-_70556	2.19967	3.60868	2.80656	2.18533
6_+_71238	1.7781	1.15287	1.96508	1.708
2_-_24105	22.9157	17.8734	23.1515	20.2663
2_+_67337	17.6886	13.4202	9.37292	8.35538
11_+_21428	16.2235	16.3132	24.1606	21.6931
5_-_12753	20.2798	11.0426	3.78331	2.64748
11_+_53892	7.9071	6.74139	8.53694	5.65233
6_+_68140	4.19109	4.39785	4.80076	3.88668
17_+_21374	17.053	14.9421	14.5793	11.8565
8_+_52065	6.36072	5.75599	3.02288	3.59382
3_+_17261	13.3025	11.7812	5.90348	4.89149
19_-_108673	14.2917	14.8432	14.3772	12.3861
7_-_66525	35.8391	24.2342	38.0015	24.784
X_+_12830	16.0007	15.101	13.3902	17.9362
5_+_13846	16.879	11.8826	11.9809	14.2235
6_-_269823	9.12313	11.3799	13.678	15.5519
10_+_67884	5.31644	5.36142	6.53454	10.1154
11_+_67966	8.1043	6.3583	6.19627	6.75102
2_+_59015	23.4268	9.81937	6.16257	2.64505
17_-_80905	16.1846	8.04639	6.54713	2.78139
19_-_207521	2.10829	1.97662	1.74465	1.24973
5_+_15194	11.0461	5.75783	2.72362	2.26901
2_+_77721	15.4817	15.1168	15.5855	21.1207
5_+_100710	27.6985	15.865	10.6011	7.32005
7_+_434156	2.51041	2.5002	3.20679	4.83781
17_+_18515	10.6537	8.48246	10.7448	11.9191
3_+_75778	3.04067	3.34341	4.0723	3.28207
4_-_109263	13.3588	13.1593	8.27959	5.16542
13_+_76577	51.7301	45.6467	41.12	44.8117
4_-_66408	8.32189	10.0516	13.636	13.4789
19_-_21873	6.9818	4.9169	3.42915	2.26831
17_+_14158	19.9892	23.8403	22.6781	18.5701
11_-_216766	14.9724	8.12563	5.68681	2.68447
9_+_72826	13.1903	9.83654	9.6867	7.69785
8_+_20377	4.89807	11.5554	13.7895	29.0749
X_+_14163	8.33577	7.07918	4.24359	6.30837
8_-_234086	2.87987	2.52454	3.93858	4.08536
4_-_230597	11.5196	7.4696	4.3354	4.76276
10_-_216151	10.3078	12.0973	10.5188	29.9924
4_-_30046	7.7345	6.24203	5.01908	9.8489
11_+_217069	11.4474	21.9028	24.8013	40.4384
4_-_192656	29.9907	15.8345	17.3416	11.6284
16_-_12394	14.9101	16.6322	7.70277	6.40618
1_-_19736	39.3897	7.98328	2.62023	2.27174
7_-_22689	3.23654	3.52872	2.50947	2.64513
9_-_109229	7.95321	8.95015	9.87163	7.64763
3_-_241915	24.4949	15.3047	7.63954	12.9305
8_+_66566	7.27577	8.09885	13.2494	16.8697
5_+_231128	15.9801	9.92982	13.7584	15.7025
12_-_66375	4.18226	6.52589	9.51645	12.137
13_-_218341	1.69291	2.47347	2.3041	2.01343
4_-_67096	5.0357	4.05023	2.72153	2.87398
12_-_11622	7.29924	1.37176	2.77028	6.29885
18_+_67222	18.3254	19.2381	21.8456	16.4528
15_+_170762	23.2531	9.39144	5.63384	4.73783
14_-_56187	8.42833	8.13249	11.794	8.59954
7_-_68277	10.066	7.95186	6.89732	5.7733
9_+_244879	13.4785	7.89087	5.45292	2.91273
2_-_319876	16.1866	5.06061	2.84041	2.06746
7_+_13170	1.15485	2.59889	6.15648	10.4028
19_+_319740	11.0515	8.20987	6.20316	9.07201
2_+_17289	4.52409	4.06136	2.72121	2.30477
11_-_70317	10.4183	12.3239	8.98763	12.2253
13_+_26919	9.05184	8.63314	6.63282	6.69478
4_+_242418	14.6366	16.5777	12.3414	10.9274
16_-_66609	12.4657	16.1084	15.9043	14.4031
7_-_70333	10.1258	8.93416	7.65035	5.33634
11_+_11541	13.2823	5.78153	8.37754	8.67515
14_-_66435	7.31626	6.81563	9.1411	8.93069
4_+_21898	3.92247	5.97795	3.65645	3.09617
7_+_272359	10.3617	8.26306	9.95742	12.5738
7_+_243931	6.1571	6.52005	3.48257	4.59064
10_+_73132	10.2766	11.574	9.08034	8.14422
14_+_67168	14.3399	11.5871	8.89078	8.97165
2_+_329506	13.8199	6.45783	4.61713	3.53853
8_-_234595	8.0221	11.6124	7.55836	6.97742
5_+_66627	4.43052	4.82312	6.44308	11.2989
12_-_217935	5.03561	5.35032	4.92829	5.45875
2_+_19124	11.6609	9.9198	17.7985	19.2729
18_+_83814	6.85687	4.84399	2.87022	2.17132
6_-_72170	10.8767	7.94067	6.38313	3.50111
17_-_22350	12.9609	6.8108	3.90159	4.54918
7_+_233812	27.5747	28.705	28.2512	27.0628
2_+_228026	2.76523	7.22966	11.7324	11.1742
10_+_70428	7.38239	7.06836	4.76698	3.90862
6_-_15398	5.76549	4.02441	6.68577	7.0917
17_+_224829	4.0681	2.75112	1.86141	5.37666
10_+_22025	6.36053	7.06116	5.2744	4.17999
8_+_73754	3.86241	4.24867	4.41652	4.22381
6_+_67027	7.98518	5.7703	4.75696	3.89075
11_-_53334	20.8011	19.306	14.9545	12.754
15_+_18133	6.41424	6.96298	6.38366	15.4865
11_-_216877	23.087	15.1787	6.7067	5.32452
3_-_74600	5.21702	4.07719	3.95307	4.79948
8_+_57321	4.69581	5.24671	4.44071	4.68845
7_-_14132	12.761	30.3526	44.4088	51.8725
11_+_103677	8.47292	9.54085	7.11139	9.56492
X_+_668166	5.83127	5.09371	4.48796	3.58881
8_+_26889	7.29928	9.79877	6.09154	6.62713
2_-_57743	29.0736	21.4329	22.8857	20.3323
13_+_100038538	1.41316	2.30243	1.99064	1.3703
5_-_12568	16.4799	16.7823	19.7876	22.9794
6_+_14911	11.7091	10.3325	12.085	8.72012
8_-_80986	42.5653	26.593	27.6187	12.1276
19_+_22359	4.38669	8.86132	4.84005	7.92656
19_+_70605	3.3979	2.50789	3.08885	5.82599
1_+_226407	14.2951	12.4247	9.81989	6.63653
9_+_66069	7.07867	7.30157	11.835	12.2994
17_-_75292	15.6982	10.4701	10.4138	8.30139
11_-_246782	14.204	12.9175	16.8879	12.5687
12_-_217379	8.31605	5.92935	3.16967	5.48623
8_-_66830	26.4212	23.1915	22.0239	17.401
9_-_66904	6.55097	13.2571	17.6632	17.324
17_-_79263	3.83686	3.20553	2.56941	3.32444
3_-_69257	15.3696	13.5643	10.8414	14.2804
9_+_211586	6.74423	4.41134	5.26972	3.89491
3_-_12722	5.50983	10.4305	4.68382	4.16744
8_+_234094	8.28818	7.59065	5.23471	6.08543
3_+_76295	17.5192	14.1968	8.50681	8.27794
4_+_66585	27.0425	17.9418	20.7587	15.3418
12_-_66204	2.98357	3.86498	9.72535	17.6773
5_-_665775	13.9639	12.0452	9.1918	7.26396
1_-_226844	9.42767	9.69212	9.56564	3.24151
12_-_217734	5.19198	4.71878	4.06081	7.32538
7_-_72759	9.74438	11.7812	10.0852	9.89961
10_-_16773	11.9467	15.3585	12.7883	8.75001
8_+_12554	14.077	9.05749	10.7284	23.9257
8_+_20650	8.16959	5.51162	3.72021	4.50109
4_-_117592	4.15634	3.96163	4.27604	4.46081
14_-_26419	18.0479	13.034	13.9409	8.49155
16_+_27406	18.7486	22.2224	19.4758	15.7544
9_-_18007	32.03	20.3322	8.24893	7.66829
13_-_218503	13.1702	10.3911	8.06672	5.48283
6_-_56284	19.7754	16.5591	14.0893	16.3789
X_-_13712	18.4958	20.5408	21.7477	37.9446
1_-_641376	5.93262	6.03678	9.93148	5.12489
2_+_66170	6.20537	7.00162	6.17151	9.26169
11_-_217335	8.70529	5.2096	6.57396	10.7105
7_+_14389	5.04769	3.93017	4.56862	3.69976
5_-_67980	12.2324	13.8046	15.5368	16.3594
10_-_66816	4.27562	2.69316	1.86479	4.06906
12_-_20471	1.39692	4.96525	2.88071	7.48826
11_-_237943	7.84342	6.0249	6.50808	4.67821
11_-_74479	11.045	10.9044	9.86696	8.32231
3_-_80890	9.72852	8.55548	8.87817	8.54487
17_+_75296	8.5951	8.95459	9.12587	4.59381
9_+_77853	24.923	20.8733	20.6629	8.82774
5_-_433904	2.15939	2.84281	6.79278	13.6969
5_+_231630	3.11985	2.57622	2.95709	5.04646
8_+_108682	5.84255	15.5898	8.6302	10.1902
11_+_103537	13.5426	11.6097	13.8866	10.7712
16_+_67374	10.6836	13.5183	7.36825	4.72705
14_+_54650	6.42834	3.69242	2.90426	1.92737
3_-_229782	38.5662	39.0299	31.4691	20.2887
2_+_69482	34.233	19.7448	18.2591	20.02
15_-_26934	68.9556	29.5451	19.9837	9.46969
11_+_70110	6.51769	16.2295	16.3696	20.8576
2_-_263876	5.91751	6.4223	4.05273	3.66087
4_-_54366	3.75039	4.1429	5.86739	4.22373
1_+_54380	6.45209	5.4754	4.99937	8.64974
8_+_57312	7.71735	4.67443	5.90133	6.23839
14_-_70601	17.4377	17.5002	18.8068	16.9543
16_-_268903	8.67938	4.47131	5.68567	4.03842
9_-_21778	2.43706	1.13383	1.15989	2.01163
X_+_320376	4.3027	2.44654	1.60887	2.86848
7_+_53415	6.43411	10.5396	13.8501	18.8685
11_-_13855	11.7886	7.94611	6.1014	6.81178
2_+_20181	16.0402	16.9626	11.6575	12.4023
11_+_68729	12.2574	11.2359	7.64692	6.59121
2_+_22034	7.02397	6.7366	5.89097	4.38448
4_+_14050	21.6695	16.6964	10.156	10.9689
2_+_14571	21.8085	13.1398	12.6308	8.23475
8_-_18408	5.25229	4.70105	4.53629	3.84986
8_-_384783	9.54635	10.904	5.27725	4.03683
11_+_69802	4.5443	4.05683	2.42885	2.04676
5_+_66114	14.3417	15.9782	18.9814	27.6119
8_-_79233	4.78413	4.33087	3.76675	3.65891
1_+_240880	6.32188	4.48136	3.92773	6.60164
3_-_170767	6.15963	5.8414	5.57507	7.01614
1_-_23797	16.8028	9.6199	4.51459	4.48618
19_-_21888	6.75968	4.21206	3.53965	1.35712
9_-_11920	8.64176	7.24573	10.1611	8.7809
14_+_171463	1.54604	2.6731	1.04362	1.17179
6_-_243548	3.86394	4.42204	6.48604	7.38906
2_+_11898	97.436	183.567	234.102	204.164
X_-_73447	11.5315	10.298	9.29615	8.5349
18_+_329003	10.7843	9.92794	11.457	19.0563
13_-_26564	9.39312	7.34919	8.76323	13.5391
2_-_252966	6.48347	4.15004	4.32071	6.67527
16_-_268882	7.36274	4.65552	4.82024	5.23609
14_+_66175	15.283	11.1105	15.525	31.4537
11_-_71795	9.54408	4.47417	6.98867	7.10207
9_+_102442	9.87912	15.8844	15.2087	12.4641
16_+_66061	3.99484	5.16632	4.5731	9.06914
16_+_67014	9.80917	6.30134	4.63352	2.99101
2_-_71436	6.18765	3.47305	3.05295	2.87322
10_+_59012	6.88003	7.58916	8.62577	5.97843
X_+_67391	37.9762	44.0741	40.4232	42.7168
5_+_100756	7.12352	7.33838	6.36921	6.62756
7_-_246694	12.9403	11.5788	9.98669	10.9688
18_-_20358	12.1314	5.57777	6.36018	6.27
X_+_666468	3.88095	5.73816	8.11187	8.13301
1_-_226778	5.4895	3.18731	2.47291	3.25149
11_+_57230	13.2408	12.4413	13.67	15.448
15_+_268783	7.27926	6.26614	4.10144	2.93941
2_+_67187	13.0497	9.72423	6.44097	4.59299
1_+_23827	31.1581	22.3637	23.3872	24.34
2_-_228876	14.5854	11.5689	10.9146	7.94732
13_+_94246	14.5062	14.3246	12.257	10.8455
9_+_20466	16.6219	7.73718	9.85169	14.1559
4_-_73162	5.30415	4.79486	6.86334	5.9293
5_+_74254	7.54191	5.0512	4.75452	5.6574
4_-_214063	3.97651	3.18656	3.72725	6.21205
15_+_17181	8.29741	8.05592	13.3332	19.7235
13_-_67285	5.72687	8.48283	8.55779	10.7769
1_-_73122	8.65967	7.501	3.86954	4.23134
17_+_224705	21.1443	19.9788	19.8453	20.397
17_+_24132	6.62709	3.84106	5.28939	2.79742
3_+_229584	8.84939	6.78715	3.70803	4.34274
5_-_22217	11.9068	8.24343	7.13712	5.28825
1_+_227333	7.57714	5.97271	4.25381	3.29016
3_+_241944	6.90976	5.71204	2.67226	2.3646
15_-_67429	20.3202	15.2977	12.4105	10.2264
3_+_66614	17.6949	14.1459	15.8086	14.9226
3_-_56195	19.7953	14.7387	15.4663	7.52
12_+_14874	13.4896	14.1484	15.7433	20.1912
17_+_224648	6.57742	5.78973	2.24849	9.32106
11_+_69900	37.5107	54.2278	66.3138	68.651
2_+_19212	9.65398	10.9102	13.754	10.2534
4_+_329877	10.683	5.76454	1.98201	1.67565
7_-_22695	21.7314	18.4478	23.448	36.8437
14_+_74427	25.7892	18.8078	13.7874	8.4432
3_-_212114	4.33311	5.81795	4.05536	5.04047
9_+_72454	10.7702	9.18915	10.6279	9.98086
9_-_235442	28.5013	25.9584	19.9965	15.4998
1_+_98402	16.2812	16.5541	10.9931	8.31131
2_-_76857	35.8777	32.8369	22.5714	14.4527
7_+_233410	10.1233	7.88673	7.46455	3.87023
1_-_67459	26.1314	21.208	14.3803	9.9872
12_+_66622	19.0653	12.1054	10.8037	10.67
10_+_216238	15.0609	15.3055	13.4591	6.63314
4_-_242585	13.5817	8.47417	5.73237	5.25367
14_+_67179	9.96748	11.9614	12.065	12.6324
11_+_215335	8.66561	13.022	8.86245	8.44687
7_-_101437	14.7623	14.3233	13.4374	15.3208
3_-_20439	7.0116	9.31312	9.09752	5.92626
10_+_52705	18.5881	15.4304	15.8809	13.4251
5_-_78697	19.3735	10.6785	7.66122	5.51442
12_+_328133	19.4497	19.6037	14.3518	11.1858
2_-_20687	29.7795	20.9236	17.6345	25.4084
19_+_83921	19.7526	10.3813	15.5495	18.9632
9_+_319480	6.0652	12.2404	4.37292	7.61863
4_-_22696	4.03788	4.15128	2.34185	2.21399
10_-_338359	10.3294	10.0287	11.0867	14.066
9_-_56503	7.32891	4.45407	5.8145	4.61764
10_-_106947	5.91082	6.09831	6.49311	7.24111
2_-_71389	10.4979	11.048	8.22489	9.91968
8_+_66756	11.5634	8.37434	5.30478	5.64929
12_+_211986	9.68323	10.8111	12.9522	10.8959
3_-_74718	7.7338	6.72142	5.06047	5.46581
10_-_215008	14.89	9.45367	9.12092	5.88224
1_-_19735	1.92463	3.49513	5.62924	4.31629
11_+_217351	5.89398	5.79059	3.41771	5.68919
8_-_211323	6.50673	6.84578	3.31294	2.21111
14_-_69156	13.4491	16.2986	27.9945	39.0266
11_+_67245	9.8291	7.40913	5.10519	4.87351
12_-_104836	6.7618	5.16066	2.2218	1.92114
15_+_66725	9.31447	6.89512	7.65375	5.1295
6_-_330401	15.7271	13.5311	10.4785	6.77342
5_+_21386	4.85394	3.89375	2.25693	2.32589
7_+_13631	10.6468	10.3367	8.93363	8.23402
11_+_67579	14.3543	16.4713	11.4778	6.86733
9_+_83703	9.56151	8.75307	6.438	6.31834
9_+_17920	6.17902	5.76307	6.97845	4.29999
7_-_140481	14.6024	10.7019	5.61347	14.3277
4_+_68828	5.1603	10.6285	9.40556	9.32746
5_+_215160	13.763	9.23463	8.09027	6.6238
9_-_235315	16.6418	13.5288	9.75642	12.7445
5_-_330173	13.961	9.52653	13.0214	20.3265
17_-_68636	5.39469	6.06786	7.27196	9.97569
11_-_53625	26.8991	42.6421	57.8171	63.5326
11_+_67291	21.0253	19.7784	18.39	17.022
13_-_210106	17.4496	16.734	9.12946	6.08241
8_-_114255	4.24692	3.14506	2.64162	3.83692
X_+_54636	12.2593	16.1151	20.7186	15.9181
4_-_79554	11.3259	10.3112	10.4074	8.57508
15_+_15426	6.35829	2.67781	3.24046	5.58909
19_+_67072	10.4184	10.2546	7.85415	8.87207
1_-_66352	7.74229	8.73018	6.79842	5.07459
8_-_67384	5.80274	5.75318	4.1815	3.61955
12_-_20666	7.3084	5.35102	1.91625	1.88307
8_-_66522	13.8666	17.3218	21.2443	19.8108
10_-_338362	3.26653	4.69994	2.87444	2.82796
9_+_57810	7.97845	8.30202	6.35571	7.65482
4_-_503610	20.8964	8.80848	6.71945	5.10997
7_+_66365	8.66876	10.3123	15.9319	15.1546
7_+_12041	46.851	42.7404	30.1715	25.6997
11_-_353047	4.94933	6.21138	6.5873	5.26633
9_+_353190	6.25205	6.23662	4.42175	4.86999
18_+_107022	5.01871	5.47574	5.41015	7.63341
7_-_13875	51.8035	45.2506	41.5781	37.8967
2_+_67871	16.6495	18.6558	20.1407	17.9427
15_+_78581	3.46906	4.20875	3.49643	6.63059
8_+_72902	3.54527	2.18082	4.76055	2.48943
7_-_233204	11.9021	20.3431	23.8243	23.971
1_-_69821	5.67199	5.78893	5.86008	5.96168
10_+_68094	20.0222	19.5852	18.4766	23.6003
4_+_71957	16.264	15.1464	18.256	15.8653
1_-_74081	17.7445	11.4137	10.0381	8.06168
1_+_227446	14.9001	16.6228	21.9023	12.917
1_+_67997	3.02676	3.1175	2.43327	5.07687
11_+_74522	20.236	16.3834	8.72686	9.79261
16_+_70757	7.85205	9.19017	7.51213	8.20351
4_-_66362	16.9153	13.053	10.1539	14.6809
8_+_15111	3.75244	2.21627	3.7682	5.387
11_+_66172	9.20812	9.47856	14.4769	11.5959
13_+_208440	8.21514	5.53935	2.16694	2.2596
1_+_213452	3.13016	2.99758	1.94973	1.36987
1_-_27392	19.9681	15.3679	12.0289	8.12729
15_-_223770	21.6045	21.162	19.5913	13.722
12_+_28071	12.9408	12.2284	8.66003	9.16446
6_+_65106	74.9994	62.0214	72.4223	79.403
12_+_67216	3.77976	3.39167	2.00491	2.59778
18_-_329002	8.09057	4.50011	3.73619	3.91002
2_+_16569	13.4863	12.048	9.6022	7.55522
15_+_239667	10.7837	8.34129	5.83596	5.68456
10_+_12798	273.56	219.303	223.418	187.448
13_+_14165	9.61786	9.27096	8.21228	7.21705
8_+_50753	8.01635	8.79673	12.6303	11.0383
12_-_18760	8.11235	5.86895	5.82297	5.05936
5_-_319974	3.17363	1.94552	2.33263	3.77817
8_-_234353	6.84492	5.12462	2.56435	2.43831
[truncated: 1,988 more rows]
