# Supplementary material for: 3′ UTR lengthening as a novel mechanism in regulating cellular senescence
Source: Genome Res. 2018 Mar;28(3):285–94. doi: 10.1101/gr.224451.117 (PMC5848608; doi:10.1101/gr.224451.117)
Supplement: Supplemental Material [file supp_gr.224451.117_Supplemental_Table_S8.xlsx]

## Sheet: 322gene_PD11_vs_PD8_Lengthen
Entez_ID	genesymbol	PD11_vs_PD6_r	PD11_vs_PD6_Pvalue	PD11_vs_PD6_fdr
5_+_52398	Sept11	0.050615	0.000834846	0.0113879
7_+_56372	1110004F10Rik	0.0963421	0.00208095	0.0220036
16_+_69053	1810013L24Rik	0.12188	0.00149374	0.017302
8_-_69551	2310022B05Rik	0.0800212	0.00230242	0.0239436
10_+_319277	A230046K03Rik	0.108177	0.000530122	0.00787931
16_+_17250	Abcc1	0.12585	0.00128903	0.015768
12_-_109711	Actn1	0.033481	0.00024405	0.0044451
16_-_11504	Adamts1	0.0843114	6.56883e-11	8.62586e-09
19_-_110355	Adrbk1	0.167716	0.00396904	0.0361458
1_+_15463	Agfg1	0.10419	0.00139298	0.016518
9_-_75723	Amotl1	0.166927	4.55194e-08	3.77291e-06
9_-_68743	Anln	0.176991	0.000662872	0.00966965
4_+_67628	Anp32b	0.074187	9.97532e-06	0.000348982
3_+_66471	Anp32e	0.161055	1.03052e-05	0.000348982
5_+_11745	Anxa3	0.0749286	2.77764e-07	1.66468e-05
14_-_11750	Anxa7	0.0781863	0.00206186	0.0218752
18_+_11777	Ap3s1	0.0716633	0.00115312	0.0146247
11_-_11840	Arf1	0.0369835	0.0044032	0.0389733
13_+_66695	Aspn	0.111632	5.24189e-07	2.79852e-05
7_+_11982	Atp10a	0.207288	0.000308281	0.00519462
18_-_56386	B4galt6	0.171909	0.00108975	0.0141893
5_-_66898	Baiap2l1	0.21907	0.00502441	0.0426736
6_-_12035	Bcat1	0.133388	0.00080619	0.011093
10_+_72567	Bclaf1	0.162583	2.19935e-13	6.302e-11
13_-_544971	Bdp1	0.170275	0.00498127	0.0424216
9_+_12175	Bnip2	0.105726	0.000108103	0.00229534
7_-_12176	Bnip3	0.11326	0.000431239	0.00669376
12_+_52592	Brms1l	0.265207	0.000486179	0.00736514
19_+_107182	Btaf1	0.176488	0.000759441	0.0105885
7_-_83962	Btbd1	0.141053	2.39435e-05	0.00065486
1_+_66882	Bzw1	0.127912	0	0
12_+_12313	Calm1	0.0510736	4.08788e-05	0.00103101
6_+_67088	Cand2	0.238213	0.00242977	0.0251024
11_-_12330	Canx	0.0870169	2.59291e-11	4.08054e-09
3_-_12340	Capza1	0.071744	0.00287668	0.0285944
X_-_12361	Cask	0.0823436	0.00631373	0.0494361
11_-_67163	Ccdc47	0.0868877	0.00273499	0.0274457
1_+_70829	Ccdc93	0.173124	0.00459459	0.0401041
5_-_231874	Ccz1	0.14417	0.000746649	0.0105538
2_+_12509	Cd59a	0.125483	8.35088e-06	0.000302424
11_+_23834	Cdc6	0.248509	0.00565254	0.0462892
1_-_214498	Cdc73	0.227301	1.211e-06	5.29543e-05
18_-_12558	Cdh2	0.0376374	0.00586013	0.0472257
X_+_18555	Cdk16	0.170158	0.000301975	0.00514337
13_-_12572	Cdk7	0.14343	6.12741e-07	3.12599e-05
4_-_12579	Cdkn2b	0.130638	1.59001e-07	1.04176e-05
1_-_108000	Cenpf	0.417313	6.86512e-05	0.00159172
15_-_223753	Cerk	0.321922	0.000398396	0.00634013
16_+_106143	Cggbp1	0.152568	1.06199e-06	4.79307e-05
5_-_74277	Chic2	0.132355	0.000805348	0.011093
6_-_12785	Cnbp	0.0759674	8.81292e-08	6.45589e-06
3_+_71994	Cnn3	0.0594438	0.000750255	0.0105538
8_+_234577	Cpne2	0.163443	0.00596789	0.0476072
1_+_433375	Creg1	0.175725	0.000130346	0.00266701
2_+_66586	Crls1	0.147751	0.00402227	0.0364201
16_-_66609	Cryzl1	0.184574	0.0063057	0.0494361
3_+_229663	Csde1	0.0574952	1.48512e-05	0.000455824
12_+_217615	Ctage5	0.181984	0.000109267	0.00229534
6_+_26965	Cul1	0.100316	0.00631955	0.0494361
9_+_66070	Cwc15	0.044935	0.00368271	0.0344339
13_-_57266	Cxcl14	0.105453	0.00130041	0.0157824
8_+_66427	Cyb5b	0.127237	0.000177805	0.0034799
6_-_13063	Cycs	0.0546282	0.000393318	0.00629109
8_+_74256	Cyld	0.263921	1.20522e-05	0.000389052
17_-_76441	Daam2	0.483939	3.14097e-05	0.000824512
11_+_71833	Dcaf7	0.15566	1.08263e-05	0.000358219
18_+_70640	Dcp2	0.226453	0.00118565	0.0148254
8_+_66498	Dda1	0.177096	6.427e-08	5.06523e-06
3_+_69219	Ddah1	0.129226	6.0997e-06	0.000243305
13_+_212880	Ddx46	0.143101	0.00110161	0.0142577
1_-_13244	Degs1	0.0574316	0.000238944	0.004403
2_+_228836	Dlgap4	0.102747	0.00044308	0.00684385
4_-_214063	Dnajc16	0.195066	0.00605435	0.0480536
2_+_76233	Dnttip1	0.138154	0.00629862	0.0494361
4_-_67299	Dock7	0.242067	3.75161e-06	0.00015149
9_+_74388	Dpp8	0.186701	2.87569e-05	0.000775631
8_-_234663	Dync1li2	0.134544	2.05433e-05	0.000571642
12_-_66266	Eapp	0.105511	0.00575388	0.0466898
8_-_13617	Ednra	0.297017	0.00379201	0.035143
8_-_112405	Egln1	0.165919	2.7387e-05	0.000744288
10_-_13688	Eif4ebp2	0.235949	2.95781e-07	1.69581e-05
7_-_13690	Eif4g2	0.0443091	2.69507e-06	0.00011049
1_+_226982	Eif5b	0.107422	0.00266466	0.0268253
13_+_13723	Emb	0.196069	2.13135e-05	0.000588739
5_+_13846	Ephb4	0.325609	0.00126695	0.0156555
17_+_67458	Ergic1	0.097723	6.87959e-06	0.000258011
13_-_211446	Exoc3	0.12838	0.00146696	0.0172478
6_-_75914	Exoc6b	0.217367	0.00484148	0.0415682
14_+_629059	Fam124a	0.365352	0.00116496	0.0146247
2_-_66960	Fam188a	0.142473	0.00019867	0.00379399
9_+_72826	Fam76b	0.213012	0.00150452	0.017302
1_-_67948	Fbxo28	0.194149	0.000188068	0.00365804
15_-_67731	Fbxo32	0.171609	0.00111188	0.0143002
6_+_67529	Fgfr1op2	0.146845	4.81991e-05	0.00118655
5_+_66899	Fip1l1	0.182781	4.53871e-09	4.47048e-07
6_-_108655	Foxp1	0.178527	0.000221287	0.00414349
3_+_51886	Fubp1	0.133838	0.000338685	0.00561682
8_+_93739	Gabarapl2	0.146558	6.09879e-12	1.37294e-09
10_+_17873	Gadd45b	0.213676	0.00186352	0.0203887
3_+_14630	Gclm	0.105981	0.00462715	0.0402024
5_+_67604	Get4	0.147845	0.000374403	0.00604997
14_-_66092	Ghitm	0.103926	3.8241e-07	2.07531e-05
4_-_56809	Gmeb1	0.305752	6.66844e-06	0.000256307
14_+_23888	Gpc6	0.128509	0.00215418	0.0227018
9_-_235283	Gramd1b	0.581675	6.66992e-05	0.00155683
16_+_56637	Gsk3b	0.104332	0.00324461	0.0314676
8_+_68153	Gtf2e2	0.148251	0.000749307	0.0105538
14_-_68705	Gtf2f2	0.111393	0.00336341	0.0321304
10_+_67933	Hcfc2	0.387674	2.40221e-06	0.000100832
1_-_208727	Hdac4	0.367711	0.00010703	0.00229534
19_+_15201	Hells	0.194289	0.00395443	0.0361171
9_-_56295	Higd1a	0.112717	1.54845e-08	1.32001e-06
5_-_215114	Hip1	0.255255	0.000733594	0.0104595
11_-_15374	Hn1	0.0977537	0.0017053	0.0189204
11_-_15384	Hnrnpab	0.0414906	0.00382962	0.0353875
1_-_51810	Hnrnpu	0.0875312	6.38531e-11	8.62586e-09
4_+_72479	Hsdl2	0.22108	0.000843123	0.0114512
19_-_73442	Hspa12a	0.225454	0.00388661	0.0358091
11_-_15525	Hspa4	0.0901178	1.13107e-10	1.36947e-08
18_-_15526	Hspa9	0.0974629	2.77556e-15	9.73309e-13
1_+_15528	Hspe1	0.0375019	6.66458e-06	0.000256307
13_+_16195	Il6st	0.0680085	0.00457927	0.0401041
1_-_226432	Ipo9	0.121451	0.000307444	0.00519462
8_-_270110	Irf2bp2	0.134355	1.54829e-07	1.03916e-05
18_+_66307	Isoc1	0.130241	0.00511942	0.0431318
6_-_74287	Kcmf1	0.138013	1.75507e-05	0.000518295
7_+_68137	Kdelr1	0.0969006	9.80311e-06	0.000346964
8_+_16598	Klf2	0.101336	0.00518231	0.0434294
9_-_244864	Layn	0.173561	6.60915e-06	0.000256307
3_+_280411	Lix1l	0.0973149	0.00066592	0.00966965
13_-_66890	Lman2	0.212025	9.55569e-13	2.3172e-10
18_-_16948	Lox	0.0857373	0	0
14_-_380916	Lrch1	0.223495	0.0025688	0.0261674
16_+_320184	Lrrc58	0.0866313	0.00102344	0.0134562
5_+_100604	Lrrc8c	0.124024	0.00336445	0.0321304
6_+_67636	Lyrm5	0.155467	0.00024336	0.0044451
4_+_26409	Map3k7	0.160732	1.01621e-06	4.77284e-05
1_-_17164	Mapkapk2	0.12022	3.19182e-05	0.000830718
18_+_212307	Mapre2	0.221257	1.24296e-07	8.68276e-06
9_-_17436	Me1	0.129951	5.97743e-09	5.38371e-07
11_-_327987	Med13	0.151461	0.00110406	0.0142577
6_+_50530	Mfap5	0.0507117	0.00524732	0.0438576
8_+_52065	Mfhas1	0.220088	0.00400171	0.0363383
5_-_109154	Mlec	0.187355	0	0
17_-_56716	Mlst8	0.389752	0.000157592	0.00316288
14_+_17387	Mmp14	0.244036	9.3349e-10	1.01375e-07
1_+_19070	Mob4	0.10024	0.000470679	0.00716478
9_-_17532	Mras	0.238844	0.000571775	0.0084205
11_+_107732	Mrpl10	0.143044	0.000424705	0.00665794
4_-_28028	Mrpl50	0.148575	6.24732e-05	0.00149195
11_+_74026	Msl1	0.27669	3.10592e-07	1.74993e-05
11_+_170749	Mtmr4	0.135918	0.00324531	0.0314676
5_+_77521	Mtus2	0.605058	0.000754905	0.010572
15_+_60315	Myg1	0.244511	0.000260895	0.00461843
17_-_67938	Myl12b	0.123353	0.00143185	0.016898
3_+_80732	Mynn	0.184617	0.00583497	0.0471435
19_-_226101	Myof	0.111663	1.61765e-07	1.04176e-05
10_+_53605	Nap1l1	0.0792724	4.83848e-08	3.91047e-06
18_+_108123	Napg	0.236115	0.000114245	0.00238401
1_-_17978	Ncoa2	0.207938	0.0042542	0.0383
9_+_17999	Nedd4	0.0633265	8.56721e-07	4.15447e-05
10_-_18045	Nfyb	0.175641	0.000670717	0.00969463
19_+_66866	Nhlrc2	0.193844	0.00166876	0.0186992
15_-_20826	Nhp2l1	0.0632078	0.00284335	0.0283525
7_-_233280	Nipa1	0.156356	0.00227368	0.023723
4_+_66536	Nipsnap3b	0.130216	0.00205987	0.0218752
X_+_67050	Nkap	0.192116	0.00310051	0.0304352
13_-_75805	Nln	0.160121	0.0054695	0.045035
11_+_18107	Nmt1	0.0946847	0.00443735	0.0391655
19_+_70769	Nolc1	0.159081	5.72387e-07	3.00395e-05
13_+_18105	Nqo2	0.210964	0.00018972	0.00366753
13_-_59050	Nsa2	0.060255	0.00294591	0.0291904
5_-_18196	Nsg1	0.184846	0.000222231	0.00414349
2_+_53893	Nudt5	0.112368	0.00517889	0.0434294
10_+_52014	Nus1	0.0869315	3.62868e-05	0.000929929
7_-_18242	Oat	0.0780481	1.54381e-05	0.00046659
10_-_216440	Os9	0.159343	0.00344284	0.0325778
6_-_71720	Osbpl3	0.195405	0.00391269	0.0358911
4_-_73162	Otud3	0.282121	0.000526771	0.00786661
14_+_69089	Oxa1l	0.166304	0.0033085	0.031881
15_+_67041	Oxct1	0.119142	3.72726e-05	0.000947841
15_+_170719	Oxr1	0.123057	1.68602e-07	1.04415e-05
12_+_217893	Pacs2	0.161829	0.00201847	0.02156
4_+_18491	Pappa	0.138375	0.000258982	0.00461046
6_+_101187	Parp11	0.279819	0.00432264	0.038695
7_+_57342	Parva	0.127599	0	0
11_-_22658	Pcgf2	0.310198	2.00337e-05	0.000567748
16_-_76302	Pcnp	0.0993246	1.92629e-05	0.000557929
9_-_18571	Pdcd6ip	0.126878	2.12796e-11	3.72868e-09
1_+_18637	Pfdn2	0.0903983	0.00123619	0.0153355
18_+_56698	Phax	0.0886561	0.00459371	0.0401041
1_+_94227	Pi15	0.296009	0.00130226	0.0157824
9_-_56469	Pias1	0.190475	0.00463138	0.0402024
11_+_327942	Pigl	0.493062	0.00017331	0.00341312
2_-_18718	Pip4k2a	0.227321	6.95743e-06	0.000258011
4_-_18786	Plaa	0.119095	0.000264817	0.00466167
8_-_83436	Plekha2	0.374987	0.0011643	0.0146247
2_-_65112	Pmepa1	0.0736103	7.93932e-05	0.00179832
12_+_18949	Pnn	0.0910815	0.00359397	0.0338048
13_+_19012	Ppap2a	0.0770512	1.06828e-06	4.79307e-05
11_+_19052	Ppp2ca	0.14392	4.92713e-09	4.65236e-07
6_+_232314	Ppp4r2	0.192454	3.45945e-13	9.08538e-11
8_+_21672	Prdx2	0.126174	7.84228e-12	1.54399e-09
11_+_19084	Prkar1a	0.107522	3.34507e-09	3.40511e-07
11_-_18750	Prkca	0.147367	0.00576399	0.0466898
14_+_67089	Psmc6	0.0564582	0.00063859	0.00935906
6_-_19242	Ptn	0.0908349	6.98863e-12	1.46837e-09
4_-_19266	Ptprd	0.256352	0.00175298	0.0193812
4_-_433813	Pusl1	0.167348	0.000447559	0.00687931
11_+_19324	Rab1	0.0410901	0.00199446	0.0214693
12_-_19325	Rab10	0.0691763	0.00016963	0.00336166
17_-_215445	Rab11fip3	0.259254	0.00249957	0.0256552
10_-_216344	Rab21	0.0618412	0.00587751	0.047245
2_+_19334	Rab22a	0.145585	0.00149168	0.017302
1_+_19335	Rab23	0.101608	0.00339997	0.0323665
4_+_59021	Rab2a	0.134524	7.54952e-14	2.379e-11
7_+_19346	Rab6a	0.0737257	0.000491332	0.00740759
6_-_19349	Rab7	0.0671154	0.00148346	0.017302
8_+_17274	Rab8a	0.112397	0.00128842	0.015768
9_-_235442	Rab8b	0.171161	0.00607091	0.0480639
5_+_56715	Rabgef1	0.218867	0.00534079	0.0442961
5_-_19353	Rac1	0.120002	1.55431e-15	6.10506e-13
15_-_26934	Racgap1	0.125725	0.00193474	0.0210219
18_+_66810	Rbm22	0.144019	0.00119688	0.0149066
8_-_52202	Rbm34	0.118606	0.00277957	0.0278045
5_+_19664	Rbpj	0.101508	0.00034331	0.00563422
4_+_108911	Rcc2	0.212926	2.38385e-10	2.77755e-08
18_-_13476	Reep5	0.0903035	1.97892e-05	0.00056718
3_+_67845	Rnf115	0.152651	0.00475761	0.0409597
8_+_330812	Rnf150	0.145621	0.00497513	0.0424216
12_+_19878	Rock2	0.107934	1.57901e-05	0.00047415
14_-_66480	Rpl15	0.0831034	6.24662e-07	3.12599e-05
14_+_67053	Rpp14	0.173902	0.00306192	0.0301504
X_+_110651	Rps6ka3	0.128731	0.00170422	0.0189204
7_-_66922	Rras2	0.0876394	0.00201108	0.0215542
8_+_192174	Rwdd4a	0.169437	7.99192e-05	0.00179832
11_+_57230	Sap30bp	0.220049	0.00509813	0.0430675
10_+_20224	Sar1a	0.0769358	1.02652e-06	4.77284e-05
9_-_235293	Sc5d	0.240313	6.25291e-07	3.12599e-05
15_-_72193	Scaf11	0.11241	0.000247351	0.00447933
11_+_52892	Sco1	0.338804	0.00102045	0.0134562
1_+_240880	Scyl3	0.195515	0.00534196	0.0442961
5_+_330222	Sdk1	0.405271	0.000908966	0.01224
3_+_20333	Sec22b	0.100331	6.38401e-05	0.00151153
3_+_69276	Sec62	0.112438	1.65788e-07	1.04415e-05
2_+_56086	Set	0.113803	0	0
19_-_319322	Sf3b2	0.0854363	0.00421244	0.0380327
1_-_108735	Sft2d2	0.202379	0.00160623	0.0182716
19_+_94280	Sfxn3	0.213247	1.01587e-10	1.28561e-08
4_-_20481	Ski	0.080664	0.00573311	0.0466898
15_-_69906	Slc25a32	0.201988	0.00299154	0.0295497
18_-_13521	Slc26a2	0.184656	0.00529955	0.0441769
6_-_58246	Slc35b4	0.223281	0.000571878	0.0084205
X_+_102857	Slc6a8	0.200337	1.72714e-06	7.36653e-05
18_-_17128	Smad4	0.123629	0.000342328	0.00563422
11_+_103677	Smg6	0.322483	0.000108928	0.00229534
18_+_67804	Snx2	0.134536	9.24653e-08	6.62426e-06
18_-_54607	Socs6	0.155873	7.93401e-05	0.00179832
17_-_20662	Sos1	0.224896	8.81137e-05	0.00196383
11_-_78912	Sp2	0.2918	0.0016735	0.0186992
2_-_20687	Sp3	0.252453	4.38285e-05	0.00109535
3_+_229285	Spg20	0.162218	1.42059e-05	0.000438669
5_+_109552	Sri	0.0785735	0.000416046	0.0065548
12_+_24067.1	Srp54a	0.0822099	2.03099e-05	0.000571119
5_+_66661	Srp72	0.117349	1.01351e-05	0.000348982
5_-_20817	Srpk2	0.200454	0.000209694	0.00395656
2_+_20823	Ssb	0.0842221	0.00012765	0.00262892
6_+_64213	St7	0.219489	0.00139441	0.016518
14_+_20916	Sucla2	0.0752666	0.00547394	0.045035
2_-_20932	Surf4	0.0928431	9.47427e-07	4.52121e-05
4_+_68592	Syf2	0.124714	0.000283876	0.0049148
5_+_57915	Tbc1d1	0.213251	5.73139e-05	0.00138886
1_+_21399	Tcea1	0.141379	0.000269384	0.00471572
X_-_66684	Tceal8	0.0546341	0.000315626	0.00529009
17_-_67673	Tceb2	0.0639687	0.000143707	0.0029128
4_-_27224	Tceb3	0.121423	0.000679598	0.00977814
11_+_21833	Thra	0.241697	6.12113e-05	0.00147207
16_-_21844	Tiam1	0.220846	0.000249939	0.00450033
3_-_17112	Tm4sf1	0.0967449	0.00434554	0.0387898
12_-_68581	Tmed10	0.157254	2.49614e-11	4.08054e-09
6_+_71900	Tmem106b	0.123367	1.07545e-06	4.79307e-05
6_-_72649	Tmem209	0.1669	0.00190583	0.0207795
8_+_74166	Tmem38a	0.197693	0.00336497	0.0321304
1_-_21961	Tns1	0.17277	6.96925e-08	5.28918e-06
8_-_67952	Tomm20	0.0368886	0.00326987	0.0316054
1_-_14897	Trip12	0.120673	8.91175e-06	0.000319039
3_+_72033	Tsc22d2	0.182944	0	0
16_+_22129	Ttc3	0.131259	0.00132822	0.0159134
19_-_70387	Ttc9c	0.177593	0.00377401	0.0350794
11_-_22210	Ube2b	0.0973251	1.90567e-05	0.00055726
3_+_66105	Ube2d3	0.0871595	2.13395e-11	3.72868e-09
17_-_22196	Ube2i	0.149661	0	0
4_+_56228	Ube2j1	0.0903349	0.00312738	0.0306036
16_-_22195	Ube2l3	0.0916158	3.22172e-07	1.78004e-05
13_-_56085	Ubqln1	0.0949474	9.26704e-05	0.00204264
16_+_224111	Ubxn7	0.254761	2.46081e-06	0.000101993
1_+_56207	Uchl5	0.140714	1.35419e-06	5.82719e-05
3_-_67890	Ufm1	0.0733514	0.00491833	0.0421132
4_+_22234	Ugcg	0.0488934	0.00112519	0.0144125
10_+_75089	Uhrf1bp1l	0.130193	0.00218122	0.0228339
4_+_329908	Usp24	0.219244	1.10349e-05	0.000360578
11_-_216987	Utp6	0.14873	0.00164379	0.0184985
1_-_67883	Uxs1	0.22874	1.31209e-05	0.000408694
17_-_68915	Vars2	0.297794	0.00250879	0.0256662
5_-_77573	Vps33a	0.17346	0.00245081	0.025237
8_+_70160	Vps36	0.121873	0.000283774	0.0049148
14_-_22380	Wbp4	0.129686	0.00199635	0.0214693
X_-_73447	Wdr13	0.249615	0.000287992	0.00495881
3_+_70465	Wdr77	0.100586	0.00183987	0.0202001
14_+_22418	Wnt5a	0.172468	2.79831e-07	1.66468e-05
11_+_103573	Xpo1	0.106451	0.000329341	0.00549076
9_-_22601	Yap1	0.143316	1.11286e-05	0.000360578
12_-_22630	Ywhaq	0.0553054	0.000233051	0.00431967
15_-_22631	Ywhaz	0.0788683	1.1238e-09	1.17637e-07
3_-_22724	Zbtb7b	0.167317	0.000108813	0.00229534
4_-_503610	Zdhhc18	0.199811	0.00503968	0.0426883
17_+_21769	Zfand3	0.140606	2.96212e-07	1.69581e-05
2_-_20402	Zfp106	0.197756	5.02415e-09	4.65236e-07
1_+_226442	Zfp281	0.147288	0.000118472	0.00245596
13_+_26919	Zfp346	0.280882	0.0017614	0.0194062
14_-_219105	Zmym5	0.236859	0.00162601	0.0184102
3_+_108946	Zzz3	0.119772	0.00155433	0.0178098

## Sheet: 79gene_PD11_vs_PD8_Shorten
Entez_ID	genesymbol	PD11_vs_PD6_r	PD11_vs_PD6_Pvalue	PD11_vs_PD6_fdr
4_-_68920	1110065P20Rik	-0.164153	0.000997372	0.0133166
10_-_67851	1700021F05Rik	-0.129337	0.00257942	0.0261674
3_+_74200	2810403A07Rik	-0.138395	0.00197071	0.0213392
2_-_11308	Abi1	-0.0754482	0.00449579	0.0395705
19_-_11475	Acta2	-0.0156641	0.000353283	0.00576785
16_-_23794	Adamts5	-0.0540565	0.0059021	0.0473219
5_-_81702	Ankrd17	-0.0931957	9.45289e-05	0.00206784
9_-_56503	Ankrd49	-0.171787	0.00343993	0.0325778
3_-_99696	Ankrd50	-0.116895	0.00537803	0.0444782
19_-_67979	Atad1	-0.121876	0.00234997	0.0243578
1_+_108147	Atic	-0.266539	1.23359e-05	0.000391488
2_+_12064	Bdnf	-0.104883	0.00576168	0.0466898
2_-_269336	Ccdc32	-0.189777	0.00376971	0.0350794
13_-_69562	Cdk13	-0.150288	0.00565578	0.0462892
12_+_12810	Coch	-0.20252	0.0016301	0.0184102
8_-_12826	Col4a1	-0.0534661	0.00216748	0.0227658
11_-_12874	Cpd	-0.114644	0.00265668	0.0268253
9_-_12988	Csk	-0.306072	4.3102e-11	6.1731e-09
17_-_28106	D17Wsu104e	-0.20045	8.64587e-10	9.73434e-08
10_-_64451	Dip2a	-0.149098	0.00472792	0.0408156
8_-_50768	Dlc1	-0.0843597	0.00148972	0.017302
8_-_56445	Dnaja2	-0.0874739	0.000144207	0.0029128
17_+_13177	Eci1	-0.184527	0.000526389	0.00786661
2_+_58521	Eid1	-0.0729256	0.000428898	0.00669038
3_+_50911	Exosc9	-0.117412	7.97636e-05	0.00179832
5_-_64339	Fndc4	-0.359044	0.000811207	0.0111135
6_+_317758	Gimap9	-0.575055	0.00114193	0.0145677
X_-_14735	Gpc4	-0.0572644	0.000206312	0.0039162
1_-_15078	H3f3a	-0.0263578	0.0059538	0.0476072
11_-_15081	H3f3b	-0.0394849	0.00131306	0.0158522
1_-_110611	Hdlbp	-0.0702396	1.46272e-07	1.0001e-05
12_+_15251	Hif1a	-0.0416437	0.00470058	0.040691
5_-_15289	Hmgb1	-0.113927	2.9332e-11	4.3964e-09
13_-_77134	Hnrnpa0	-0.0837082	8.85443e-05	0.00196383
7_+_16190	Il4ra	-0.135106	1.05813e-05	0.000355326
14_+_70572	Ipo5	-0.0820778	5.63317e-05	0.0013752
9_+_319480	Itga11	-0.243752	0.000198656	0.00379399
18_-_106931	Kctd1	-0.297248	0.000361126	0.00586551
1_-_226519	Lamc1	-0.146469	0.00103185	0.0134911
11_-_268490	Lsm12	-0.149488	2.91085e-05	0.000777069
12_+_17169	Mark3	-0.112401	0.00132353	0.0159134
19_-_72199	Mms19	-0.235135	3.09173e-05	0.000818201
13_+_94066	Mrpl36	-0.155504	0.000255361	0.00457183
11_+_67212	Mrpl55	-0.215666	0.000404412	0.00640353
10_+_68114	Mum1	-0.251298	0.00362607	0.0340052
11_-_18102	Nme1	-0.0642472	1.62671e-05	0.000484541
11_-_18230	Nxn	-0.0826681	9.64131e-05	0.00209487
18_+_67869	Paip2	-0.0733746	0.00138228	0.0164984
2_+_14827	Pdia3	-0.114266	0.000974075	0.0130609
16_-_208177	Phldb2	-0.0525631	0.00129106	0.015768
7_+_26939	Polr3e	-0.180072	0.000868114	0.01174
12_+_19042	Ppm1a	-0.104648	0.00439051	0.0389733
19_+_18938	Ppp1r14b	-0.0748036	6.57077e-05	0.00154493
7_-_243819	Ppp6r1	-0.114673	0.00632268	0.0494361
7_-_57296	Psmd8	-0.0500895	0.000767637	0.0106556
18_+_19290	Pura	-0.165329	1.02645e-05	0.000348982
18_+_19330	Rab18	-0.0574639	0.00391829	0.0358911
17_+_67045	Riok2	-0.14931	0.00150164	0.017302
12_+_20135	Rrm2	-0.083536	4.74972e-05	0.00117852
9_+_20187	Ryk	-0.131579	6.83482e-06	0.000258011
3_-_99683	Sec24b	-0.0927154	0.00116348	0.0146247
11_-_20335	Sec61g	-0.0592453	1.27654e-05	0.000403328
11_-_67863	Slc25a11	-0.0939322	0.00102491	0.0134562
3_-_229782	Slc35a3	-0.326855	6.40755e-07	3.15592e-05
11_-_57376	Smarce1	-0.089927	0.000379266	0.00609728
7_-_66624	Spcs2	-0.0805998	0.0059836	0.0476119
17_-_20815	Srpk1	-0.128344	0.000459884	0.00703444
13_-_107513	Ssr1	-0.0748645	0.000161743	0.00322565
2_-_56324	Stam2	-0.153638	0.00157844	0.0180206
1_+_20846	Stat1	-0.28486	7.05375e-08	5.28918e-06
2_+_21353	Tank	-0.143203	0.000717631	0.0102784
6_-_213233	Tapbpl	-0.266751	0.0043978	0.0389733
6_+_52440	Tax1bp1	-0.103169	3.55742e-05	0.000919472
11_-_103694	Tmed4	-0.227367	1.18179e-08	1.03283e-06
5_-_73130	Tmed5	-0.0820762	0.00427151	0.0383462
1_+_67534	Ttll4	-0.250564	0.00324562	0.0314676
16_+_73569	Vgll3	-0.0691304	7.20227e-06	0.000263805
14_-_65246	Xpo7	-0.16224	0.00258269	0.0261674
7_+_65020	Zfp110	-0.153621	0.00346852	0.0327224
16_+_22661	Zfp148	-0.131932	0.00100998	0.0134281
8_-_30932	Zfp330	-0.134535	0.000297513	0.00509491

## Sheet: 957gene_2y_vs_2w_Lengthen
Entez_ID	genesymbol	2y_vs_2w_r	2y_vs_2w_Pvalue	2y_vs_2w_fdr
chr2_-_294862	March6	0.17354	8.1e-10	1.88165e-08
chr3_+_311059	March7	0.0956669	0.000113933	0.000882375
chr4_+_24153.1	A2m	0.0260452	2.46e-05	0.000228006
chr5_+_171553	A3galt2	0.0739934	0.00369883	0.0165107
chr5_-_313210	Abca1	0.566342	0	0
chr4_-_24646	Abcb1b	0.10248	0.0136667	0.0472303
chr19_+_361390	Abce1	0.174774	1.77e-11	5.28887e-10
chr7_+_299617	Abhd17a	0.110833	0.0001097	0.00085455
chr1_+_293050	Abhd2	0.281652	5.95e-11	1.68963e-09
chr15_+_364380	Abhd4	0.101894	0.00236736	0.0115035
chr11_+_619382	Acap2	0.114754	0.00212094	0.0104199
chr17_-_307170	Acbd5	0.263435	1.67e-05	0.000161514
chr1_-_81633	Acta2	0.0290072	0.000283341	0.00195941
chr6_-_81634	Actn1	0.0758488	0	0
chr14_-_289820	Actr2	0.0803834	1.24e-06	1.62786e-05
chr7_+_25237	Acvrl1	0.129733	0.00102135	0.00575984
chr11_-_79252	Adamts1	0.027024	9.53e-05	0.000755606
chr2_-_294809	Adamts12	0.0821273	0.000273021	0.00190449
chr11_-_304135	Adamts5	0.134506	0.0128661	0.0449919
chr19_-_84420	Adcy7	0.191535	0.00352991	0.0158628
chr13_+_289036	Adipor1	0.0536264	0.0121861	0.0431415
chr11_-_25371	Adprh	0.107698	0.00514096	0.0215318
chr1_-_25238	Adrbk1	0.154561	0.00117131	0.00636354
chr19_+_361436	Afg3l1	0.118977	0.000285274	0.00196937
chr9_+_363266	Agfg1	0.0630482	0.000381469	0.00252463
chr5_-_313594	Ago1	0.178027	0.00112034	0.00617745
chr16_-_306582	Agpat5	0.205852	1.68e-09	3.696e-08
chr3_+_84114	Agps	0.205664	6.43e-08	1.12427e-06
chr5_-_298646	Agtrap	0.284384	5.54e-08	9.90275e-07
chr1_-_26956	Ak3	0.0834348	5.01e-05	0.000422317
chr5_+_298024	Akap2	0.155255	0	0
chr7_+_245960	Alg10	0.283037	0.00193185	0.00963279
chr16_-_361174	Alg11	0.160352	0.00547997	0.0226204
chr10_+_303193	Alkbh5	0.11992	0.0055412	0.0227792
chr3_+_59319	Ambra1	0.252183	0.00788593	0.0303026
chr3_+_311412	Anapc1	0.22299	3.2e-09	6.77926e-08
chr13_+_305035	Angel2	0.186888	0.0110234	0.0399074
chr9_+_316775	Ankrd12	0.343161	5.64e-06	6.30798e-05
chr10_+_690586	Ankrd40	0.105942	0.00181195	0.00914886
chr5_+_170724	Anp32b	0.113441	1.69e-07	2.7067e-06
chr4_-_79124	Anxa4	0.0742626	0.00178747	0.00904808
chr15_+_155423	Anxa7	0.134801	8.58e-07	1.18056e-05
chr19_-_171494	Ap1g1	0.126597	2.57e-06	3.13728e-05
chr1_+_81637	Ap2a2	0.0908674	0.0046541	0.0198821
chr11_-_116563	Ap2m1	0.0894047	9.79e-08	1.66805e-06
chr2_+_309969	Ap3b1	0.0977766	0.00659343	0.0260613
chr11_-_54226	App	0.127467	0	0
chr10_-_303396	Appbp2	0.246291	1.38e-09	3.06973e-08
chr6_+_299197	Arel1	0.154872	0.008698	0.0328555
chr10_-_64310	Arf1	0.0637747	3.44e-08	6.37674e-07
chr16_+_79120	Arf4	0.2038	2.69e-07	4.09535e-06
chr3_+_246310	Arfgap1	0.156387	1.37e-11	4.18739e-10
chr3_+_296380	Arfgef2	0.205757	0.000181536	0.00134357
chr3_-_117051	Arfrp1	0.186507	1.65e-10	4.34421e-09
chr1_+_29221	Arg1	0.120209	6.9e-05	0.000568469
chr19_+_688429	Arhgap10	0.113555	0.0102597	0.0373791
chr1_-_293947	Arhgap18	0.262594	0.00168849	0.00862334
chr9_-_301709	Arhgap28	0.351958	2.03e-08	3.88905e-07
chr11_-_288093	Arhgap31	0.183887	0.000189593	0.00139035
chr1_-_306400	Arhgap35	0.0598804	0.0127778	0.0448352
chr8_-_367072	Arhgef12	0.149735	2.19e-07	3.4253e-06
chr2_+_310635	Arhgef2	0.0785763	0.00089487	0.00515548
chrX_-_363509	Arhgef6	0.244833	5.4e-07	7.83391e-06
chr20_+_309728	Arid5b	0.112751	8.32e-07	1.14873e-05
chr8_-_300756	Arih1	0.0717423	0.00957857	0.0353155
chr3_-_311279	Arl14ep	0.104532	0.00896742	0.0336509
chr6_-_29308	Arl4a	0.156399	2.1e-05	0.00019738
chr2_-_294948	Armc1	0.0984864	0.0117169	0.0418132
chrX_+_367902	Armcx3	0.151641	2.52e-05	0.00023249
chr8_+_60336	Arpp19	0.121534	2.43e-14	1.05758e-12
chr16_+_84431	Asah1	0.0852913	0.00123865	0.00666608
chr20_+_294408	Asf1a	0.138556	0.00428472	0.0185671
chr16_+_290829	Ash2l	0.129817	0.000134526	0.00102016
chr4_-_25612	Asns	0.0864947	0.00302791	0.0139353
chr1_-_293526	Ate1	0.126484	3.11e-08	5.84622e-07
chr13_-_304962	Atf6	0.0714186	0.0134378	0.0466652
chr20_+_406169	Atf6b	0.123287	0.00214183	0.0105097
chr9_+_81643	Atic	0.0727842	0.00714384	0.0279063
chr1_+_309187	Atl3	0.0626712	0.00406179	0.0178131
chr5_+_362645	Atp13a2	0.209115	0.0140279	0.0482032
chr13_-_25650	Atp1b1	0.068612	0.0117968	0.0420235
chr8_-_25390	Atp1b3	0.0827671	4.42e-08	8.0444e-07
chr12_-_116455	Atp6v0a2	0.203319	4.59e-06	5.25096e-05
chr5_+_298103	Atp6v1g1	0.040401	0.000684764	0.00409835
chr3_+_83526	Atrn	0.224509	6.41e-08	1.12427e-06
chr8_+_300673	Bcl9l	0.118056	0.00509142	0.021369
chr10_-_114558	Becn1	0.0938295	3.15e-05	0.000282794
chr4_-_29631	Bet1	0.0809507	0.00465769	0.0198821
chr3_+_317630	Bloc1s6	0.135107	0.0136831	0.0472303
chr1_+_292737	Blvrb	0.131907	1.72e-05	0.000165153
chr8_-_300811	Bnip2	0.085478	0.000432911	0.00281912
chr7_-_362844	Brd4	0.137661	0.000212165	0.00152242
chr1_+_368042	Btaf1	0.143019	0.00628783	0.0252269
chr13_-_29619	Btg2	0.0778562	1.3e-07	2.10737e-06
chr1_+_361662	Bub3	0.141399	0.000110095	0.000855962
chr9_+_363232	Bzw1	0.232442	0	0
chr14_-_289810	C1d	0.10964	0.00612535	0.0247736
chr4_+_65044	C1galt1	0.152893	4.95e-08	8.92784e-07
chr5_-_500501	Caap1	0.197607	0.000765079	0.00450497
chr9_+_301574	Cab39	0.199057	3.31e-13	1.20484e-11
chr5_+_298267	Cachd1	0.230126	0.000155975	0.00116952
chr1_-_365493	Cacul1	0.0725734	0.00939105	0.0348164
chr4_+_25687	Cald1	0.0188559	0.00191097	0.0095644
chr6_+_24242	Calm1	0.111799	0	0
chr1_-_24244	Calm3	0.145547	2.35e-14	1.034e-12
chr4_+_192226	Cand2	0.203685	0.00295203	0.0136174
chrX_+_302669	Car5b	0.163732	0.000126663	0.000971568
chr10_+_260416	Carhsp1	0.0708553	0.000286958	0.00197759
chr1_-_293871	Carnmt1	0.133867	0.00159653	0.00823777
chr1_-_293638	Cars	0.145689	9.18e-06	9.49786e-05
chr8_+_156117	Casp12	0.201431	4.65e-06	5.30444e-05
chr14_-_498404	Ccdc117	0.18101	0.0140753	0.0482926
chr1_-_308060	Ccdc127	0.189935	1.38e-06	1.794e-05
chr11_-_64387	Ccdc80	0.033631	1.24e-05	0.0001232
chr5_+_114839	Ccnc	0.23036	0.00492486	0.020757
chr4_+_64033	Ccnd2	0.0713272	2.42e-05	0.000225341
chr17_-_361261	Ccny	0.124474	0.000479531	0.00309186
chr2_-_294864	Cct5	0.0356443	0.00567393	0.0232294
chr4_+_297406	Cct7	0.182357	0	0
chr8_-_315716	Cd276	0.143633	0.00635209	0.0253577
chr1_-_293505	Cd2bp2	0.109526	0.000121648	0.00093669
chr4_-_24936	Cd9	0.0666589	0.00515331	0.021561
chr16_+_290875	Cdc16	0.131464	0.000279342	0.00193845
chr18_-_291689	Cdc23	0.123899	0.00272908	0.0128104
chr18_-_307511	Cdc25c	0.220202	0.00758945	0.0293606
chr13_+_114116	Cdc42bpa	0.137412	2.13e-06	2.66516e-05
chr13_-_304832	Cdc73	0.123958	0.00147417	0.00770104
chr2_+_25409	Cdh6	0.159938	0.0119499	0.0424557
chrX_-_81741	Cdk16	0.125331	9.48e-05	0.000753133
chr4_+_140908	Cdk5	0.256273	3.47e-05	0.000307387
chr2_-_688611	Cetn4	0.412482	0.00621724	0.0250189
chr19_-_292027	Cfdp1	0.105812	0.000547545	0.0034096
chr6_-_366624	Cfl2	0.0755229	3.3e-06	3.90923e-05
chr11_+_288353	Cggbp1	0.223948	2.86e-10	7.1127e-09
chr1_+_308215	Chd1	0.104758	0.0126932	0.0446603
chr16_+_290614	Cherp	0.12803	0.000791488	0.0046468
chr1_+_29194	Chka	0.188149	0.011827	0.0420937
chr1_+_292999	Chsy1	0.0721128	0.0104137	0.0379057
chr3_-_362149	Cir1	0.159158	9.3e-05	0.000740302
chr20_+_294362	Cisd1	0.0499492	0.00999105	0.0366339
chr2_-_295457	Cisd2	0.130344	1.7e-05	0.000164019
chr2_-_499655	Cks1b	0.176614	1.4e-11	4.24667e-10
chr11_-_65129	Cldn1	0.0735575	0.000421633	0.00276304
chr5_-_83718	Clic4	0.0986327	0	0
chr10_+_360515	Clint1	0.104683	0.000415791	0.00272922
chr12_+_65201	Clip1	0.0898505	0.0106484	0.0386196
chr12_+_60669	Cmklr1	0.248895	4.45e-10	1.06693e-08
chr5_-_298410	Cmpk1	0.106311	0.000242153	0.00171002
chr4_-_64530	Cnbp	0.136648	0	0
chr15_-_289994	Cnih1	0.0420909	0.00365959	0.0163538
chr1_+_294014	Cnnm2	0.191902	0.00132215	0.00702107
chr2_+_25654	Col11a1	0.0631486	5.34e-11	1.52724e-09
chr16_+_290905	Col4a1	0.129449	0	0
chr9_-_85250	Col5a2	0.0334268	6.43e-06	6.99612e-05
chr4_+_297428	Copg1	0.0937928	0.000734039	0.00435421
chr3_-_261736	Cops2	0.186553	1.11e-16	6.08827e-15
chr9_+_301416	Coq10b	0.206235	1.85e-07	2.92783e-06
chr6_-_299195	Coq6	0.193153	0.00163141	0.00838534
chr3_-_362249	Cpne1	0.137946	0.0120834	0.0428538
chr5_-_313087	Cpne3	0.203739	6.42e-07	9.14793e-06
chr19_+_171547	Crispld2	0.242132	1.72e-11	5.17811e-10
chr3_+_366196	Crls1	0.194612	0.00045079	0.00292065
chr11_-_288256	Cryzl1	0.217419	5.38e-05	0.000449719
chr2_+_117180	Csde1	0.12258	1.71e-13	6.5208e-12
chr3_+_362273	Cse1l	0.0957618	0.00478264	0.0202857
chr16_+_306375	Csgalnact1	0.144524	3.92e-07	5.81321e-06
chr10_-_64462	Csnk1d	0.156345	6.32e-14	2.66371e-12
chr7_-_315308	Csrnp2	0.215217	0.00452691	0.0194066
chr3_+_311670	Cstf1	0.160332	0.00589081	0.0239703
chr10_+_287447	Ctdnep1	0.115766	1.43e-05	0.000139312
chr5_+_503000	Ctnnbip1	0.217691	0.000256521	0.00179565
chr1_+_293184	Ctr9	0.10999	0.00532167	0.0221266
chr8_+_25425	Ctsh	0.0523232	0.00512345	0.0214809
chr17_-_25697	Ctsl	0.0322926	4.47e-05	0.000382433
chr1_-_60465.1	Cttn	0.0636991	0.00659262	0.0260613
chr9_-_301555	Cul3	0.128951	7.66e-06	8.17884e-05
chr8_-_64624	Cul5	0.104155	0.0136265	0.047157
chr10_-_360613	Cwc25	0.266775	0.00969621	0.0357163
chr19_+_80773	Cyb5b	0.177516	5.86e-07	8.40984e-06
chr3_+_295669	Cybrd1	0.154448	2.1e-09	4.56978e-08
chr4_-_25309	Cycs	0.0475648	0.00349476	0.0157402
chr4_+_25427	Cyp51	0.106961	0.000503057	0.00321764
chr2_-_295238	Dap3	0.139547	1.19e-05	0.000119718
chr17_+_81653	Dbn1	0.189187	1.69e-08	3.34988e-07
chr16_+_688813	Dda1	0.264983	8.53e-14	3.52104e-12
chr2_+_64157	Ddah1	0.0578766	0.000667883	0.0040033
chr19_+_292022	Ddx19a	0.143115	0.00055519	0.00345183
chrX_-_317335	Ddx3x	0.0539595	4.68e-05	0.00039785
chr7_-_362912	Derl1	0.195352	0	0
chr5_+_114214	Dffa	0.187223	0.00268723	0.0126584
chr11_+_360741	Dgcr14	0.311554	2.96e-06	3.56983e-05
chr7_-_140866	Dgka	0.271591	3.26e-05	0.000291362
chr2_+_24312	Dhfr	0.165934	0.00242496	0.0116864
chr5_+_313689	Dhrs3	0.102413	5.73e-08	1.01969e-06
chr18_-_307483	Diaph1	0.0920284	0.0116696	0.0417187
chr20_+_690211	Dip2a	0.125991	0.0127276	0.0447421
chr15_-_306103	Dis3	0.186475	0.00819947	0.0312673
chr8_+_300721	Dnaja4	0.144401	0.000378382	0.00251668
chr11_-_360734	Dnajb11	0.117169	8.87e-06	9.24882e-05
chr20_+_294513	Dnajb12	0.141169	0.00444832	0.0191517
chr2_+_499716	Dnajb14	0.243081	0.00255664	0.0122157
chr2_-_295549	Dnajb4	0.186748	0.000298779	0.00204498
chr3_+_295690	Dnajc10	0.0848437	0.000992834	0.00563873
chr7_+_114481	Dnajc14	0.146891	0.00153741	0.00797578
chr15_+_63880	Dnajc3	0.111969	1.07e-09	2.4069e-08
chr3_+_79130	Dnajc5	0.124968	1.87e-05	0.000178273
chr15_-_259237	Dock9	0.276211	0.00772896	0.0297851
chr8_+_300668	Dpagt1	0.0930074	0.00669574	0.0263616
chr3_-_296394	Dpm1	0.0953934	0.00221313	0.0108221
chr18_-_25418	Dpysl3	0.112862	2.29e-13	8.65015e-12
chr2_+_362011	Dram2	0.106009	0.0102169	0.0372912
chr3_+_311151	Dusp19	0.234835	0.00207113	0.0102254
chr10_-_498003	Dusp3	0.089226	0.00131751	0.00700574
chr3_+_116659	Dync1i2	0.0635509	0.0137168	0.0473058
chr19_+_81655	Dync1li2	0.185988	0	0
chrX_-_363448	Dynlt3	0.276485	0	0
chr11_+_25255	Dyrk1a	0.135968	0.000432463	0.00281912
chr7_-_314862	Dyrk2	0.104247	0.00259235	0.0123569
chr1_+_309069	Edrf1	0.39036	7.9e-06	8.39034e-05
chr8_-_171361	Eef1a1	0.153794	0	0
chr7_-_29565	Eef2	0.0410139	8.99e-15	4.28523e-13
chr1_+_25435	Eef2k	0.0872216	0.0131074	0.0456629
chr1_+_293677	Efemp2	0.0291854	0.00307372	0.0140901
chr5_-_298609	Efhd2	0.260622	7.35e-07	1.03991e-05
chr2_-_310643	Efna4	0.325422	6.02e-05	0.000498018
chr9_-_116683	Efna5	0.311727	4.52e-07	6.60514e-06
chr7_+_362923	Efr3a	0.198515	4.27e-05	0.000368472
chr15_-_290212	Efs	0.143773	0.000943737	0.00539818
chr3_-_192204	Ehd4	0.176814	1.11e-16	6.08827e-15
chr10_+_287703	Eif1	0.026964	3.34e-05	0.000297848
chrX_+_302697	Eif1ax	0.136313	3.92e-14	1.68771e-12
chr6_+_54318	Eif2s1	0.113609	2.09e-06	2.62331e-05
chr3_-_296302	Eif2s2	0.0478639	0.00255978	0.0122162
chr3_+_691947	Eif3j	0.101595	4.84e-06	5.5055e-05
chr1_-_292762	Eif3k	0.0517485	0.011325	0.0408016
chr10_-_287436	Eif4a1	0.190896	0	0
chr11_-_303831	Eif4a2	0.0749988	1.83e-06	2.32613e-05
chr1_-_361628	Eif4g2	0.0658629	8.4e-13	2.87467e-11
chr6_-_56783	Eif5	0.151636	1.44e-15	7.488e-14
chr2_+_310261	Eif5a2	0.180615	0.00346113	0.0156063
chr9_+_308306	Eif5b	0.12453	3.81e-05	0.00033676
chr3_-_305506	Eif6	0.132347	2e-06	2.52618e-05
chr19_-_361425	Emc8	0.0993074	0.0018385	0.00925188
chr10_+_360468	Emp2	0.286474	8.28e-07	1.14717e-05
chr13_-_360891	Enah	0.194816	0	0
chr1_+_85496	Enpp1	0.0527043	4.3e-05	0.000370262
chr4_-_494219	Eogt	0.175906	0.000128274	0.00098017
chr18_-_307503	Etf1	0.197501	0	0
chr14_-_289752	Ewsr1	0.130239	7.28e-06	7.85691e-05
chr15_-_60627	Exoc5	0.213198	4.02e-05	0.000352212
chr10_-_64632.1	Exoc7	0.15084	0.00014941	0.0011224
chr8_+_140930.1	Faim	0.191925	0.00240853	0.0116611
chr10_-_619573	Fam104a	0.137891	2.56e-05	0.000235638
chr9_+_363236	Fam117b	0.147907	0.00255515	0.0122157
chr13_+_63912	Fam129a	0.0536985	0.00394829	0.0173916
chr2_+_310540	Fam198b	0.0488122	0.00116171	0.00633718
chr8_+_300836	Fam214a	0.161673	0.0140019	0.0481647
chr16_-_498600	Fam32a	0.207278	0	0
chr6_+_298890	Fam49a	0.229531	1.8e-10	4.62e-09
chr17_+_291031	Fam8a1	0.135052	0.00128786	0.00690305
chr7_+_689997	Fam91a1	0.0909772	0.00676888	0.0265973
chr1_+_293173	Far1	0.169715	5.97e-09	1.23854e-07
chr1_+_246097	Fas	0.0967019	0.00450007	0.0193228
chr6_-_301674	Fbxo11	0.122375	0.00244667	0.0117605
chr13_-_305105	Fbxo28	0.197136	1.79e-07	2.84411e-06
chr3_+_690634	Fbxo3	0.135155	0.00620609	0.0249992
chr18_+_25317	Fgf1	0.161501	0.00084612	0.00490284
chr2_+_54250	Fgf2	0.312345	0.000208171	0.00150183
chr16_-_79114	Fgfr1	0.106954	0.000925946	0.00531159
chr4_+_362463	Fgfr1op2	0.177078	0.000432586	0.00281912
chr14_-_289582	Fip1l1	0.176677	1.05e-12	3.53294e-11
chr4_-_362366	Fkbp14	0.0837602	0.00752966	0.0291574
chr4_-_260321	Fkbp4	0.0938569	0.000704139	0.00420175
chr3_-_192348	Fnbp1	0.126388	0.00942234	0.0349001
chr16_+_25318	Fnta	0.081053	0.00939067	0.0348164
chr6_+_64511	Fntb	0.163453	8.61e-10	1.96997e-08
chr1_+_25445	Fosl1	0.189139	0.00199783	0.00990013
chr6_-_25446	Fosl2	0.131897	2.91e-09	6.19768e-08
chr10_+_303753	Foxk2	0.0986275	0.00241737	0.0116757
chr4_+_58921	Foxm1	0.184102	0.0135116	0.0468402
chr4_-_297480	Foxp1	0.0719641	0.00392715	0.0173558
chr20_+_79209	Frk	0.130305	0.000815125	0.00476461
chr3_-_295691	Frzb	0.13752	0.00391861	0.0173371
chr11_-_79210	Fstl1	0.0644244	0	0
chr1_+_308577	Fuz	0.320101	0.00040681	0.00267906
chr10_+_64512	Fzd2	0.196036	1.11e-16	6.08827e-15
chr17_+_364754.1	Fzd8	0.0609631	0.0115818	0.0414791
chr14_+_305240	G3bp2	0.114813	1.56e-06	2.00844e-05
chr19_+_64670	Gabarapl2	0.0709027	0.000147181	0.00110773
chr6_-_314360	Galc	0.154627	0.00812583	0.031016
chr10_+_170501	Galnt10	0.115809	0.00240188	0.011643
chr19_+_292090	Galnt2	0.215885	8.33e-11	2.28447e-09
chr4_+_25159	Gata2	0.186449	0.010996	0.0398444
chr16_+_290669	Gatad2a	0.0941939	0.011374	0.0409177
chr2_+_29739	Gclm	0.151504	0.00065439	0.00394012
chr12_-_288518	Get4	0.221431	6.68e-12	2.15255e-10
chr10_-_27100	Gfer	0.189715	5.19e-05	0.000434744
chr4_+_297417	Gfpt1	0.090024	0.000171717	0.00127325
chr4_-_362368	Ggct	0.139372	0.00192975	0.00963279
chr4_+_81716	Ggcx	0.0681123	0.0138363	0.047636
chr10_-_360584	Ggnbp2	0.078953	0.0143327	0.0489243
chr17_+_291211	Ggps1	0.2479	2.4e-06	2.96593e-05
chr16_-_290596	Ghitm	0.127828	0	0
chr12_+_304546	Git2	0.165998	0.000100469	0.00079033
chr19_+_29476	Glg1	0.103783	3.37e-06	3.98038e-05
chr20_-_294320	Glo1	0.0824891	2e-08	3.8686e-07
chr13_+_24957	Glul	0.112835	0.000275755	0.00191688
chr15_-_81661	Gmfb	0.187986	0	0
chr7_+_81662	Gna11	0.167598	2.74e-06	3.31449e-05
chr10_+_303634	Gna13	0.286742	1.15e-13	4.65111e-12
chr1_+_81666	Gnaq	0.0993381	0.00171821	0.00873061
chr4_+_114120	Gng12	0.130887	0	0
chr12_-_312077	Golga3	0.142058	1.77e-05	0.000169143
chr11_-_192243	Golgb1	0.114984	0.000848306	0.00490841
chr4_+_362460	Golt1b	0.192576	0	0
chr2_+_499653	Gon4l	0.205019	0.0126256	0.0444616
chr10_-_64154	Gosr2	0.132793	1.16e-06	1.53796e-05
chr16_+_290843	Gpat4	0.0905341	0.000399968	0.00263834
chr2_-_294734	Gpbp1	0.085763	0.00169949	0.00866848
chrX_-_679890	Gpkow	0.20968	0.000531251	0.00334981
chr6_-_688393	Gpn1	0.130267	0.0143855	0.0490209
chr3_-_311857	Gpr107	0.282975	0	0
chr2_-_362003	Gpr89b	0.114216	0.0136793	0.0472303
chr10_+_287805	Gprc5c	0.239818	2.73e-05	0.000247867
chr19_-_307759	Gpt2	0.143898	0.0034126	0.0154746
chr18_+_307288	Gramd3	0.151461	0.00432062	0.0186823
chr10_+_81504	Grb2	0.0766734	0.000409884	0.00269487
chr18_-_688777	Grpel2	0.186706	4.15e-05	0.000359667
chr16_+_361180	Grtp1	0.243075	0.00107458	0.00596756
chr11_+_84027	Gsk3b	0.158298	2.65e-06	3.21533e-05
chr20_+_29487	Gstt2	0.190122	0.000194834	0.00141582
chr16_-_306516	Gtf2e2	0.0940984	0.00435762	0.0188036
chr2_-_294693	Gtf2h2	0.164645	0.013115	0.0456629
chr9_-_316810	Gtf3c3	0.135418	0.0105081	0.0381801
chr2_+_58940	H2afz	0.156008	0	0
chr10_+_117056	H3f3b	0.096671	0	0
chr5_-_298655	H6pd	0.149453	8.63e-07	1.18337e-05
chr6_+_170670	Hadha	0.169932	2.01e-11	5.96151e-10
chr1_+_309434	Hif1an	0.175157	0.0042085	0.018356
chr8_-_140937	Higd1a	0.113433	1.27e-07	2.07554e-06
chr12_+_192154	Hip1	0.389497	0	0
chr2_-_365895	Hipk1	0.0734236	0.010083	0.0369034
chr2_+_295568	Hltf	0.32456	1.2e-07	1.96918e-06
chr2_-_25675	Hmgcr	0.10193	0.0053383	0.0221728
chr11_-_360704	Hmgn1	0.0436224	2e-05	0.000189314
chr19_+_307667	Hmgxb4	0.222144	0.00811719	0.0310126
chr10_+_287828	Hn1	0.328381	0	0
chr1_+_80846	Hnrnpl	0.0616988	7.78e-05	0.000631869
chr1_+_309197	Hnrnpul2	0.196631	1.4e-14	6.44322e-13
chr16_+_306548	Hook3	0.158958	8.78e-06	9.17888e-05
chrX_-_24465.1	Hprt1	0.0556818	0.000597145	0.00365558
chr14_+_64537	Hpse	0.283737	2.14e-11	6.30041e-10
chr9_+_316325	Hs6st1	0.107848	0.000827955	0.00481851
chr10_-_266759	Hspa4	0.168379	0	0
chr9_-_63868	Hspd1	0.0581887	0.00345622	0.0156017
chr5_+_170818	Icmt	0.108075	0.00924693	0.0343776
chr3_+_25261	Id1	0.0602139	0.000618884	0.00376597
chr17_-_89784	Idi1	0.253388	1.41e-10	3.84057e-09
chr3_-_499801	Ifih1	0.2706	0.00280012	0.0130977
chr11_+_288264	Ifnar1	0.106635	0.0019367	0.00964495
chr1_+_25718	Igf1r	0.165682	0.00277647	0.0130175
chr5_-_140934	Ikbkap	0.261069	6.15e-13	2.16005e-11
chr16_+_84351	Ikbkb	0.174225	4.32e-05	0.000371186
chr3_+_60582	Il1rn	0.126099	0.0114622	0.0410874
chr1_+_361749	Il33	0.0902026	0.00171033	0.00870162
chr1_+_25084	Il4r	0.0754094	0.0140372	0.0482032
chr2_+_25205	Il6st	0.16227	0	0
chr9_-_316317	Imp4	0.161935	4.97e-06	5.6056e-05
chr16_-_306626	Ing1	0.168675	4.21e-06	4.84392e-05
chr10_-_287533	Inpp5k	0.120095	0.00112163	0.00617745
chr13_-_288985	Insig2	0.118442	0.014272	0.0488038
chr8_+_64831	Ireb2	0.195874	2e-08	3.8686e-07
chr17_+_290985	Isca1	0.119415	1.72e-08	3.39255e-07
chr19_+_307833	Ist1	0.134722	1.14e-05	0.000115852
chr17_-_364786	Itga8	0.045488	0.00114087	0.00624389
chr11_-_257645	Itgb5	0.0512711	0.00109353	0.00604763
chr2_+_29439	Jtb	0.203335	0	0
chr16_-_24518	Jund	0.0962894	2.82e-08	5.32608e-07
chr7_+_366848	Kank3	0.37475	0.00100753	0.00570601
chr16_-_306571	Kat6a	0.181199	0.00260981	0.012394
chr12_+_494521	Kctd10	0.112089	2.54e-08	4.81998e-07
chr8_+_315664	Kdelc2	0.13089	8.29e-10	1.90765e-08
chr13_+_304809	Kdm5b	0.121771	0.00425809	0.0184917
chr5_-_117548	Kif1b	0.166656	3.02e-06	3.59883e-05
chr20_-_606294	Kif1bp	0.199523	0.00242542	0.0116864
chr2_-_84391	Kif2a	0.184278	1.18e-07	1.95236e-06
chr10_+_84392	Kif3a	0.153525	0.000979629	0.00557164
chr3_-_296284	Kif3b	0.168195	0.00167715	0.00858735
chr6_+_313994	Klf11	0.243343	0.00590311	0.023996
chr14_-_114845	Klf3	0.205152	1.19e-07	1.96081e-06
chr4_+_312199	Klhdc10	0.100825	0.00911127	0.0340313
chr11_-_303803	Klhl24	0.15209	0.000530545	0.00334981
chr15_-_361055	Kpna3	0.164245	8.56e-05	0.000686859
chr5_-_362607	Kpna6	0.0891622	0.00450255	0.0193228
chr4_+_312437	Krcc1	0.200488	2.47e-06	3.04304e-05
chr9_+_114515	Lancl1	0.165846	1.12e-06	1.48986e-05
chr6_+_683626	Lbh	0.0449189	0.00489049	0.0206446
chr6_+_313949	Ldah	0.293191	1.06e-06	1.41948e-05
chr18_+_679578	Ldlrad4	0.132958	0.000202648	0.00146727
chr16_+_361160	Leprotl1	0.156809	4.88e-15	2.44244e-13
chr17_-_116641	Lgals8	0.248127	3.12e-13	1.1461e-11
chr2_+_499677	Lix1l	0.262913	1.99e-14	9.0545e-13
chr13_+_304816	Lmod1	0.12255	3.31e-10	8.13082e-09
chr14_+_100911576	LOC100911576	0.235528	0	0
chr2_-_361990	LOC361990	0.20357	0	0
chr1_-_499339	LOC499339	0.194766	1.24e-11	3.8192e-10
chr10_-_619574	LOC619574	0.188937	4.04e-08	7.45445e-07
chr8_-_689959	LOC689959	0.107913	0.00178485	0.00904627
chr18_-_24914	Lox	0.0484156	7.26e-14	3.02802e-12
chr14_+_116565	Lrpap1	0.0971899	5.45e-05	0.000454621
chr1_-_361588	Lrrc28	0.20902	0.000380364	0.00252463
chr10_+_287633	Lrrc59	0.0628672	0.00168823	0.00862334
chr14_-_305135	Lrrc8b	0.303574	4.21e-05	0.000364079
chr8_+_301035	Lrrfip2	0.105022	0.000498447	0.00319325
chr6_+_59106	Ltbp2	0.0644711	1.07e-05	0.000109572
chr4_+_312251	Luc7l2	0.118085	0.00101904	0.00575493
chr11_+_360745	Lztr1	0.108905	0.000190362	0.00139344
chr7_+_366960	Maff	0.139911	0.000235225	0.00166698
chr2_-_295319	Man1a2	0.133518	0.00283062	0.0131788
chr5_-_362625	Man1c1	0.268589	5.61e-05	0.000466995
chr9_+_25478	Man2a1	0.100105	0.000396972	0.0026229
chrX_-_29253	Maoa	0.148766	4.88e-09	1.02301e-07
chr2_-_29456	Map1b	0.112557	4.35e-05	0.000372964
chr19_+_64862	Map1lc3b	0.0494778	0.00327243	0.0148896
chr10_-_287398	Map2k4	0.141575	1.55e-06	2.002e-05
chr8_+_367171	Map4	0.0946429	3.15e-11	9.13957e-10
chr9_+_301363	Map4k4	0.125669	2.7e-10	6.75675e-09
chr6_-_503027	Map4k5	0.194982	8.86e-10	2.01565e-08
chr20_+_81649	Mapk14	0.107669	0.000210236	0.00151128
chr3_+_114764	Mapre1	0.0546984	0.00359843	0.0161164
chr20_+_25603	Marcks	0.100194	2.33e-15	1.19607e-13
chr13_-_117016	Mark1	0.22524	0.00548724	0.0226271
chr10_-_683630	Mat2b	0.092554	0.00785097	0.0301972
chr18_-_307449	Mcc	0.232452	0.00880335	0.0331596
chr2_+_60430	Mcl1	0.0471373	0.00393312	0.017363
chr14_-_24551	Mdh1	0.0997924	2.85e-07	4.30505e-06
chr13_-_304798	Mdm4	0.283115	0.000288248	0.00197967
chr18_-_307270	Me2	0.292734	5.42e-07	7.83454e-06
chr1_-_292889	Med25	0.145648	0.00115299	0.0062982
chr2_-_295500	Metap1	0.198001	1.78e-08	3.49369e-07
chr3_-_499878	Mfap1a	0.164559	4.06e-05	0.000354166
chr10_+_287299	Mfap3	0.27765	4.86e-06	5.51259e-05
chr2_+_192647	Mfn1	0.126885	0.00112491	0.006187
chr18_+_307414.2	MGC108823	0.169164	0.00877562	0.0330862
chr18_+_498830	MGC116121	0.196088	0.00520883	0.0217478
chr5_+_313418	Mier1	0.166171	5.93e-05	0.000491588
chr12_+_304543	Mlec	0.17782	0	0
chr1_-_26955	Mllt4	0.108957	0.00197937	0.00982083
chr10_+_360631	Mlx	0.16794	4.52e-05	0.000385066
chr8_-_25482	Mras	0.220932	2.7e-05	0.0002457
chr8_+_64046	Mre11a	0.214436	0.00479541	0.0203183
chr10_+_691075	Mrpl10	0.236494	0.00030628	0.00209274
chr9_-_301250	Mrpl14	0.108246	0.00423891	0.0184284
chr1_-_171061	Mrpl17	0.0702931	0.000667714	0.0040033
chr4_-_297372	Mrpl19	0.207564	5.43e-06	6.10722e-05
chr9_+_301552	Mrpl44	0.0978759	0.0064694	0.0257746
chr1_-_309176	Mrpl49	0.0824483	0.0111313	0.0402252
chr4_+_297601	Mrpl51	0.137352	2.06e-07	3.2346e-06
chr4_+_297727	Mrps35	0.0926382	0.000845214	0.00490284
chr3_+_311903	Mrrf	0.205551	5.15e-05	0.000432298
chr5_+_362516	Msantd3	0.261038	0.000207216	0.00149764
chr10_+_303514	Msl1	0.167576	0.000433007	0.00281912
chr15_+_289904	Mss51	0.404316	0.000934722	0.00535426
chr7_+_500870	Mtbp	0.433826	0.00325731	0.0148376
chr3_+_295922	Mtch2	0.11849	3.77e-15	1.91077e-13
chr7_+_170910	Mtdh	0.0743631	0.00709146	0.0277287
chr8_+_300886	Mthfs	0.302234	0.0041406	0.0180993
chr14_+_305606	Mtif2	0.36874	0.00537052	0.0222604
chr10_-_287607	Mtmr4	0.119428	0.00294192	0.0136021
chr1_-_361473	Mtrf1l	0.210574	0.00130777	0.00697245
chr16_+_306487	Mtus1	0.161549	6.7e-06	7.27014e-05
chr5_+_298576	Mul1	0.272848	0.0134831	0.0467819
chr1_+_25701	Mxi1	0.249437	0.000135827	0.00102807
chr3_+_296344	Mybl2	0.204871	0.00463486	0.0198269
chr3_-_679712	Myef2	0.129448	0.00383234	0.0170307
chr10_+_79433	Myh10	0.0559522	2.28e-05	0.000213297
chr10_+_24582	Myh11	0.0465973	0.00956765	0.0353077
chr7_-_25745.1	Myh9l1	0.0332882	2.09e-05	0.000197367
chr11_-_288057	Mylk	0.0346633	0.00389378	0.0172655
chr8_+_171296	Myo9a	0.170975	0.0127945	0.0448352
chr16_+_25486	Myo9b	0.0994045	0.000596028	0.00365466
chr10_-_246297	Myocd	0.248976	1.21e-06	1.5937e-05
chr11_+_288309	N6amt1	0.294646	0.000185021	0.00136408
chr9_+_64824	Nab1	0.155079	1.14e-05	0.000115852
chr6_+_297508	Nampt	0.107965	0.00255104	0.0122157
chr18_+_307382	Napg	0.254392	2.78e-09	5.95247e-08
chr5_-_298441	Nasp	0.0784917	0.00508476	0.0213635
chr10_+_303669	Nat9	0.130826	0.0074787	0.0290162
chr1_+_171563	Nav2	0.299185	7.68e-07	1.0752e-05
chr5_+_298075	Ncbp1	0.109926	0.0054565	0.0225631
chr3_-_58823	Nckap1	0.0857267	0.00191708	0.00958301
chr9_-_25135	Ncl	0.0462198	0.000581959	0.00358487
chr10_-_54299	Ncor1	0.263738	9.33e-12	2.89902e-10
chr13_-_289231	Ncstn	0.11261	0.000471683	0.00304616
chr8_-_56769	Ndufaf3	0.0846194	0.0126142	0.0444606
chr6_+_298748	Ndufaf7	0.172421	0.00954047	0.0352724
chr2_-_499529	Ndufs4	0.0467967	0.00563098	0.0230772
chr8_-_25489	Nedd4	0.11668	1.9e-09	4.15716e-08
chr17_+_291044	Nedd9	0.0665603	3.9e-05	0.0003432
chr3_+_360161	Nek6	0.0484012	0.00636125	0.025369
chr7_+_679504	Nemp1	0.155319	0.00685867	0.0268973
chr20_+_361794	Nfkbil1	0.220203	0.00579546	0.0236545
chr5_+_313166	Nfx1	0.247654	2.1e-05	0.00019738
chr7_-_300092	Nhp2l1	0.119013	2.14e-06	2.66933e-05
chr8_+_619581	Nicn1	0.181823	0.00106486	0.00594658
chr10_+_497961	Nlk	0.158632	0.000364118	0.00243801
chr17_-_291318	Nmt2	0.138786	8.83e-05	0.000705695
chr8_-_300691	Nnmt	0.15095	0.000120298	0.000928079
chr2_-_310378	Nnt	0.107982	0.000512894	0.00325973
chr1_+_64896	Nolc1	0.13226	7.96e-05	0.000643876
chr3_+_691534	Nop10	0.0816785	0.00130604	0.00697245
chr3_-_25496	Notch1	0.569734	6.12e-06	6.78794e-05
chr7_+_81526	Nov	0.0393844	1.01e-08	2.05281e-07
chr1_+_85431	Nox4	0.262195	1.71e-13	6.5208e-12
chr7_+_25497	Npap60	0.0844785	0.00752258	0.0291574
chr6_+_286898	Npc2	0.0354125	0.00956495	0.0353077
chr10_-_140639	Nploc4	0.120147	0.00536586	0.0222604
chr7_+_79240	Nr4a1	0.0829679	0.00113457	0.00623159
chr5_+_58853	Nr4a3	0.413589	9.06e-07	1.2297e-05
chr18_-_338475	Nrep	0.0724284	1.39e-05	0.000136077
chr1_+_116595	Nrxn2	0.338062	0.011412	0.0409673
chr2_-_171456	Nsa2	0.0419499	0.00937176	0.0348094
chr14_+_25247	Nsg1	0.177959	0.000128554	0.000980439
chr8_-_50864	Ntm	0.220384	0.00395297	0.017393
chr1_-_84595	Nucb1	0.0650317	0.000273835	0.00190684
chr13_+_64709	Nucks1	0.298447	0	0
chr19_+_291877	Nudt21	0.114344	0.0111217	0.0402252
chr20_-_294292	Nudt3	0.0883533	0.0017041	0.00868091
chr7_-_94267	Nudt4	0.11988	1.11e-16	6.08827e-15
chr17_-_361274	Nudt5	0.14705	0.000462602	0.00299234
chr2_+_117021	Nup155	0.315128	0.000250785	0.00176165
chr14_+_53372	Nup54	0.226782	0.00891291	0.0335092
chr20_+_294400	Nus1	0.15387	6.84e-13	2.36098e-11
chr19_+_291981	Nutf2	0.170332	4.76e-12	1.56222e-10
chr6_+_24609	Odc1	0.0705445	0.00114005	0.00624389
chr4_+_81528	Ogg1	0.181075	0.011243	0.0405557
chr4_-_140914	Olr1	0.36636	0	0
chr3_-_295596	Orc4	0.155485	0.00159947	0.00824232
chr7_-_362891	Os9	0.0676705	0.0114001	0.0409673
chr3_-_296461	Osbpl2	0.109019	0.00141543	0.00743751
chr3_+_311129	Osbpl6	0.339347	4.13e-05	0.00035871
chr5_-_298369	Osbpl9	0.223422	1.03e-13	4.20829e-12
chr2_-_362040	Ostc	0.0561377	8.48e-06	8.93524e-05
chr2_+_690163	Oxct1	0.106676	7.41e-05	0.00060427
chr7_+_117520	Oxr1	0.255196	1.5e-10	4.05811e-09
chr10_-_83572	Pafah1b1	0.241037	0	0
chr14_-_140946	Paics	0.096226	0.00903977	0.0338907
chr18_+_361309	Paip2	0.112058	7.53e-07	1.0579e-05
chr2_-_361878	Papd4	0.217946	3.9e-07	5.80506e-06
chr14_-_286894	Parm1	0.0596606	0.0082921	0.0315756
chr13_+_25591	Parp1	0.152576	0.000138212	0.00104415
chr1_+_57341	Parva	0.121662	0	0
chr7_+_362973	Parvb	0.223108	0.000818036	0.00477075
chr2_+_310644	Pbxip1	0.139602	2.02e-08	3.8885e-07
chr2_-_295027	Pcdh18	0.312645	3.18e-08	5.94987e-07
chr11_+_288165	Pcnp	0.124114	3.86e-06	4.51913e-05
chr4_-_246302	Pcyox1	0.125542	2.98e-06	3.58316e-05
chr11_-_140544	Pcyt1a	0.130535	8.6e-05	0.000688688
chr1_+_309458	Pdcd11	0.139107	0.000878027	0.00507304
chr8_-_501083	Pdcd6ip	0.138866	1.06e-08	2.14356e-07
chr9_+_316348	Pdcl3	0.139743	3.88e-06	4.52931e-05
chr4_+_50678	Pde3a	0.240784	0.00102397	0.0057665
chr8_+_66018	Pdgfd	0.125468	0.00238733	0.0115865
chr14_-_25267	Pdgfra	0.169852	1.18e-13	4.72472e-12
chrX_+_29554	Pdha1	0.113983	6.33e-06	6.963e-05
chr3_+_29468	Pdia3	0.069216	8.11e-05	0.000653369
chr3_+_116551	Pdk1	0.17456	8.71e-07	1.19027e-05
chr2_-_64353	Pdlim5	0.045994	1.22e-05	0.000122122
chr13_-_364052	Pea15	0.0351336	0.00282323	0.0131597
chr5_-_78962	Per3	0.289223	0.00183928	0.00925188
chr18_-_361310	Pfdn1	0.0577163	0.00793206	0.0304506
chr18_-_81746	Pggt1b	0.147095	0.00652293	0.0259105
chr16_+_290648	Pgpep1	0.173673	0.000343112	0.00230894
chr10_+_25344	Phb	0.187376	3.07e-11	8.97247e-10
chr8_-_300772	Pias1	0.189101	0.000240965	0.00170464
chr1_+_89816	Picalm	0.0944958	6.66e-16	3.50877e-14
chr11_+_288041	Pigx	0.156135	8.92e-08	1.53286e-06
chr1_+_361632	Pik3c2a	0.101172	0.00068651	0.00410267
chr2_-_25513	Pik3r1	0.13126	0.000994861	0.00564224
chr17_-_116723	Pip4k2a	0.097522	0.0101418	0.0370846
chrX_-_683077	Pja1	0.19443	2.06e-10	5.22041e-09
chr9_-_192256	Pja2	0.102451	3.57e-07	5.33369e-06
chr19_-_29355	Pkn1	0.332617	5.47e-10	1.28835e-08
chr2_-_207122	Pkn2	0.128944	0.000182862	0.00135088
chr11_-_287925	Pkp2	0.202571	6.17e-06	6.8245e-05
chr3_+_311341	Pla2g4b	0.425804	0.000367294	0.00245517
chr5_-_116645	Plaa	0.177245	1.27e-06	1.66179e-05
chr9_+_301337	Plekhb2	0.0429277	0.00662109	0.0260933
chr1_-_308543	Plekhf1	0.217435	1.21e-05	0.000121425
chr17_+_361282	Plxdc2	0.115111	9.44e-09	1.92846e-07
chr3_+_296588	Pmpca	0.0975813	0.0129213	0.0451457
chr6_+_368070	Pnn	0.0915227	0.00877209	0.0330862
chr1_-_293144	Pold3	0.213873	0.00282128	0.0131597
chr10_-_287544	Poldip2	0.130881	0.000142054	0.00107116
chr2_-_685465	Polr3g	0.305535	2.66e-05	0.000242611
chr12_+_288455	Pomp	0.184406	0.00210743	0.0103778
chr1_-_293645	Ppfia1	0.160118	4.06e-05	0.000354166
chr4_+_312381	Ppm1k	0.207631	1.17e-06	1.5461e-05
chr1_-_361613	Ppme1	0.109855	0.00896138	0.0336509
chr6_-_25594	Ppp1cb	0.050232	0.00619028	0.0249858
chr7_-_116670	Ppp1r12a	0.141218	9.98e-08	1.68945e-06
chr1_+_114004	Ppp1r14a	0.153746	0.0118382	0.0420962
chr13_+_304799	Ppp1r15b	0.191412	3.33e-07	4.99375e-06
chr10_+_84686	Ppp1r9b	0.248178	0.000128821	0.000980607
chr16_-_24673	Ppp2cb	0.0694495	8.78e-06	9.17888e-05
chr6_-_362739	Ppp2r3c	0.245702	3.36e-05	0.000298965
chr9_+_140943	Ppp4r1	0.133463	0.000208695	0.0015029
chr4_+_297486	Ppp4r2	0.100731	0.00073649	0.00436229
chr3_-_171121	Ppp6c	0.0965139	0.00307008	0.0140901
chr1_-_309144	Ppp6r3	0.0973427	0.00468442	0.0199537
chr1_-_64371	Prdx3	0.0539246	0.00986564	0.0362737
chr13_-_94167	Prdx6	0.0435816	1.75e-06	2.23153e-05
chr6_-_298771	Prepl	0.216474	1.03e-05	0.000106019
chr4_+_312563	Prickle2	0.162593	1.28e-05	0.000126234
chr2_+_64562	Prkab2	0.137967	0.00730975	0.0284434
chr10_+_25725	Prkar1a	0.190554	0	0
chr6_-_85421	Prkd1	0.21895	0.00504837	0.0212329
chr7_+_81750	Pros1	0.0780576	6.39e-06	6.99059e-05
chr17_+_171552	Prpf18	0.230971	7.94e-06	8.41052e-05
chr10_-_117272	Prpsap2	0.131772	0.00770059	0.0297044
chr7_+_363004	Prr13	0.0748164	1.38e-05	0.000135429
chr13_-_266813	Prrx1	0.156929	0	0
chr1_-_308807	Prss23	0.0420983	8.77e-07	1.19439e-05
chr1_-_293820	Psat1	0.076773	0.00651155	0.025891
chr19_-_307821	Psmd7	0.1105	4.92e-06	5.56488e-05
chr1_+_293620	Ptdss2	0.0998288	0.00439697	0.018951
chr7_+_362809	Ptges3	0.0584787	0.000584248	0.00359344
chr6_-_299194	Ptgr2	0.183877	0.00114149	0.00624389
chr7_-_25614	Ptk2	0.124944	1.68e-06	2.14911e-05
chr14_-_498407	Purb	0.136218	2.11e-05	0.000197856
chr6_+_554172	Pxdn	0.132557	1.38e-13	5.36458e-12
chr6_-_50993	Rab10	0.102004	5.16e-09	1.07608e-07
chr8_-_81830	Rab11a	0.0844502	2.63e-05	0.000240423
chr3_-_94197	Rab14	0.0989782	8.74e-06	9.17888e-05
chr14_+_81754	Rab1a	0.0459647	0.000310128	0.00211542
chr3_+_366265	Rab22a	0.163604	5.55e-06	6.22471e-05
chr8_-_50645	Rab27a	0.224083	0.00185159	0.00930207
chr5_+_65158	Rab2a	0.185006	0	0
chr12_-_288700	Rab35	0.188688	2.06e-06	2.59379e-05
chr4_-_500249	Rab43	0.219589	0.00735276	0.0285553
chr1_+_84379	Rab6a	0.058052	0.00291516	0.0135096
chr4_-_29448	Rab7a	0.0782038	0.000187107	0.00137464
chrX_+_84589	Rab9a	0.110645	0.00116781	0.00635317
chr12_+_363875	Rac1	0.197909	0	0
chr5_+_298012	Rad23b	0.0512391	0.000591867	0.00363472
chr10_-_64012	Rad50	0.21715	0.0020795	0.0102541
chr2_+_294804	Rai14	0.111647	6.36e-11	1.7808e-09
chr17_+_81757	Rala	0.0919772	2.32e-07	3.61451e-06
chr3_-_362257	Ralgapb	0.225	4.87e-10	1.16068e-08
chr12_-_84509	Ran	0.100467	0	0
chr5_+_362551	Raver2	0.30773	0.000642784	0.00389366
chr5_-_312927	Rb1cc1	0.152955	4.14e-09	8.72451e-08
chrX_-_83712	Rbbp7	0.0512454	4.1e-05	0.000356878
chr3_-_311902	Rbm18	0.164112	1.19e-05	0.000119718
chr19_-_307956	Rbm34	0.175883	0.00456783	0.019561
chr3_-_362251	Rbm39	0.0518424	0.00394235	0.0173846
chr3_-_311909	Rc3h2	0.0749559	0.00918235	0.034172
chr11_-_266766	Rcan1	0.133849	5.93e-05	0.000491588
chr18_-_364838	Reep5	0.0395845	7.44e-05	0.000605483
chr5_-_298675	Rer1	0.0699861	1.27e-05	0.000125558
chr2_-_361871	Rfesd	0.263364	0.00163619	0.00839911
chr1_-_499328	Rfk	0.121197	0.00481785	0.0203703
chr13_-_289084	RGD1309104	0.0772246	0.00708306	0.0277229
chr17_+_361201	RGD1311345	0.135211	0.000890565	0.00513807
chr1_-_293160	RGD1311703	0.0977892	0.00164653	0.00844136
chr3_-_311428	RGD1311739	0.17609	0.000287938	0.00197967
chr5_+_298384	RGD1559786	0.172368	0.000169489	0.00125906
chr19_-_498967	RGD1559896	0.0838588	3.51e-13	1.26613e-11
chr8_+_292328	RGD1562747	0.250717	1.28e-06	1.66942e-05
chr11_-_360692	RGD1563888	0.207278	0.00917561	0.034172
chr20_+_294311	RGD735065	0.0998964	0.00374693	0.0166882
chr7_-_116839	Rims2	0.184721	0.0132013	0.0458837
chr18_+_361293	Riok3	0.2939	0	0
chr2_+_499652	Rit1	0.135014	4.02e-05	0.000352212
chr1_-_292268	Rmnd1	0.186651	0.00233306	0.0113645
chr3_-_295588	Rnd3	0.158668	0.000438334	0.00284917
chr7_+_314613	Rnf126	0.245296	0.000332759	0.00225062
chr18_-_94196	Rnf138	0.114685	0.00553963	0.0227792
chr18_+_619577	Rnf14	0.105402	0.000833488	0.00484367
chr1_-_308900	rnf141	0.264461	1.57e-08	3.1275e-07
chr4_-_297337	Rnf181	0.121221	1.66e-10	4.34421e-09
chr14_-_29274	Rnf4	0.0579393	0.0015063	0.00784014
chr8_-_300948	Rnf7	0.108466	9.55e-05	0.000755696
chr6_+_25537	Rock2	0.0763488	2.99e-05	0.000269639
chr9_-_501157	Rpe	0.0939583	0.00912763	0.0340606
chr5_+_81768	Rpl22	0.0208889	0.006084	0.0246562
chr1_+_64638	Rpl28	0.028948	0.00070812	0.00421922
chr5_-_122772	Rps20	0.0699963	0.00435808	0.0188036
chr7_-_27139	Rps26	0.0217553	0.00190827	0.00956284
chr8_+_29236	Rpsa	0.0170549	0.000508057	0.00323927
chr4_-_362416	Rpusd3	0.205435	0.00421811	0.0183779
chr1_-_365355	Rras2	0.156648	0	0
chr10_+_304714	Rrn3	0.0998221	0.00518966	0.0216904
chr2_+_361956	Rsrc1	0.13981	0.0141412	0.0484773
chr3_+_366169	Rtf1	0.188947	1.17e-05	0.0001183
chr1_-_140945	Rtn3	0.196206	0	0
chr11_-_50662	Runx1	0.301584	0	0
chr16_-_502084	Rwdd4	0.124904	5.01e-05	0.000422317
chr3_+_311580	Samhd1	0.330414	0.00605808	0.024576
chr10_-_360662	Sap30bp	0.218485	0.000102804	0.000807112
chr20_+_361842	Sar1a	0.116985	0	0
chr3_-_114123	Sardh	0.146258	0.000750917	0.00443462
chrX_+_302642	Sat1	0.0476928	0.0002961	0.00203011
chr12_+_288615	Sbds	0.197786	1.48e-08	2.96296e-07
chr7_-_312030	Scaf11	0.127713	1.75e-05	0.000167632
chr14_+_117106	Scarb2	0.123836	2e-07	3.15276e-06
chr19_-_364981	Scoc	0.0697489	0.00194739	0.00967415
chr5_-_25541	Scp2	0.0791125	0.000164814	0.00122787
chr4_-_502776	Scrn1	0.160862	0.00036968	0.002467
chr14_+_289504	Sdad1	0.162156	0.00159487	0.00823777
chr6_+_25216	Sdc1	0.0883171	0.000108002	0.000844609
chr7_+_25615	Sdc2	0.0388655	0.000112287	0.000871312
chr13_+_289315	Sde2	0.138877	0.00805856	0.0308475
chr8_-_363061	Sdhd	0.104914	3.17e-05	0.000283953
chr10_-_360652	Sdk2	0.43644	0.0030756	0.0140901
chr1_-_65166	Sec11a	0.0729355	0.000231758	0.00164824
chr4_-_297522	Sec13	0.134089	1.71e-10	4.446e-09
chr6_-_58817	Sec23a	0.12702	4.97e-10	1.17751e-08
chr4_-_80843	Sec61a1	0.0560484	0.000645849	0.00390042
chr20_+_309858	Sec63	0.150843	9.34e-12	2.89902e-10
chr6_-_314352	Sel1l	0.329991	0	0
chr6_-_362713	Seli	0.185939	0.000323276	0.00220136
chr16_+_290549	Selk	0.0472096	0.0145262	0.0494582
chr4_-_296787	Sema3c	0.0742721	0.000331994	0.00224925
chr17_-_291314	Sephs1	0.174559	0.00116634	0.00635317
chr3_+_502663	Serf2	0.0370116	4.06e-07	5.99861e-06
chr3_-_296350	Serinc3	0.041054	0.000164983	0.00122787
chr2_-_80881	Serp1	0.281312	0	0
chr17_-_361241	Serpinb9	0.0769298	9.93e-05	0.000782672
chr2_-_689954	Setd7	0.0705987	0.00603087	0.0244905
chr16_+_58967	Sfmbt1	0.236636	0.00104204	0.00585179
chr16_-_84402	Sfrp1	0.214241	0	0
chr13_-_360868	Sft2d2	0.138145	5.1e-05	0.000429
chr17_-_364678	Sfxn1	0.113749	4.7e-08	8.51529e-07
chr1_+_65042	Sfxn3	0.06416	0.00550344	0.0226706
chr14_+_680229	Sgcb	0.160665	2.06e-08	3.92773e-07
chr15_-_305941	Sgcg	0.179685	0.0026409	0.012499
chr1_-_353229	Sgms1	0.211727	7.82e-05	0.000633832
chr2_-_310849	Sgms2	0.123202	0.00128279	0.00688512
chr16_-_306376	Sh2d4a	0.257758	6.29e-06	6.93806e-05
chr13_-_360848	Shisa4	0.0883999	0.00158321	0.00819014
chr2_-_140593	Siah2	0.238024	0.000615781	0.00375555
chr18_-_291441	Ska1	0.222429	0.00189599	0.00951323
chr10_+_287280	Skp1	0.0543439	7.33e-06	7.8896e-05
chr14_-_305310	Slain2	0.223328	5.88e-15	2.90661e-13
chr7_-_300083	Slc25a17	0.104605	0.00568171	0.0232375
chr8_+_117035	Slc25a20	0.0978634	0.00261252	0.012394
chr2_+_310791	Slc25a24	0.0905496	0.00072919	0.00433186
chr18_-_291709	Slc25a46	0.107535	0.000568644	0.00351366
chr20_-_353307	Slc29a3	0.176013	0.000958988	0.00546978
chr3_-_64469	Slc30a4	0.15986	0.000246042	0.00173137
chr2_-_294698	Slc30a5	0.124034	0.000108396	0.000846038
chr2_-_310801	Slc30a7	0.120166	0.00609102	0.0246597
chr6_-_298851	Slc35f6	0.154782	1.6e-05	0.000155119
chr7_-_29642	Slc38a2	0.0699019	4.31e-07	6.32133e-06
chr7_+_362861	Slc41a2	0.213134	6.84e-11	1.9019e-09
chr10_-_287532	Slc43a2	0.227171	0.00468016	0.0199537
chr1_-_50690	Slc6a8	0.252384	4.27e-10	1.02994e-08
chr16_-_64554	Slc7a2	0.0778328	0.0125777	0.044371
chr8_+_24546	Slco2a1	0.277103	0.0101771	0.03718
chr10_+_303057	Slu7	0.179827	0.000644919	0.00390042
chr18_-_50554	Smad4	0.0655811	0.0116374	0.0416408
chr5_-_298500	Smap2	0.164271	2.51e-05	0.000232103
chr19_+_307766	Smarca5	0.0714075	0.00290338	0.0134706
chr6_+_313961	Smc6	0.123199	0.00830396	0.0315756
chr10_+_287522	Smg6	0.255869	1.07e-05	0.000109572
chr5_-_500595	Smim1	0.121999	1.26e-05	0.000124877
chr14_+_364154	Smim14	0.147888	0	0
chr1_+_292401	Smoc2	0.256921	3.68e-13	1.3156e-11
chr12_+_690516	Smurf1	0.117644	0.00033614	0.00226965
chr10_-_303614	Smurf2	0.168864	1.05e-06	1.41081e-05
chr3_+_296126	Snrnp200	0.189923	8.38e-12	2.64201e-10
chr5_+_313056	Snrnp40	0.213271	0.000504533	0.00322193
chr3_-_171365	Snrpb	0.084982	0.000753302	0.00444215
chr8_+_315478	Snx19	0.19464	0.000598004	0.00365558
chr18_+_291464	Snx2	0.142157	4.21e-08	7.69719e-07
chr20_+_684097	Snx3	0.13714	3.09e-13	1.1461e-11
chr3_-_296199	Snx5	0.168757	2.57e-09	5.56231e-08
chr6_-_362738	Snx6	0.0979155	0.00230379	0.0112355
chr1_+_24787	Sod2	0.122385	1.02e-14	4.74893e-13
chr15_-_282843	Sorbs3	0.289884	1.65e-10	4.34421e-09
chr2_+_83576	Sort1	0.289785	1.38e-12	4.6046e-11
chr6_-_313845	Sos1	0.179079	0.00250111	0.0120077
chr10_+_360600	Spag9	0.146773	6.35e-08	1.12006e-06
chr6_+_192225	Spata7	0.182701	0.012955	0.0452238
chr1_-_293142	Spcs2	0.142261	6.57e-13	2.2875e-11
chr10_+_303208	Specc1	0.152856	5.91e-08	1.04706e-06
chr19_+_353231	Spg7	0.132279	0.000622998	0.00378526
chr10_+_287643	Spop	0.0794852	2.51e-07	3.8654e-06
chr18_+_291469	Srfbp1	0.2712	2.67e-07	4.08041e-06
chr4_-_683667	Sri	0.191877	0	0
chr5_+_362630	Srsf10	0.0976357	0.000784641	0.00461337
chr18_-_361295	Ss18	0.0663713	0.00235392	0.0114521
chr5_+_84354	Ssbp3	0.201768	7.99e-15	3.90146e-13
chr17_+_361233	Ssr1	0.0973291	1.01e-12	3.42715e-11
chr7_-_81800	St13	0.0865537	1.23e-05	0.000122816
chr9_-_116696	St8sia4	0.0920923	0.0014752	0.00770104
chr12_-_498130	Stard13	0.276146	2.31e-10	5.81713e-09
chr15_-_361092	Stk24	0.170411	2.54e-07	3.89661e-06
chr3_-_54348	Stk39	0.437819	3.38e-08	6.29466e-07
chr9_+_501146	Stradb	0.20743	0.00319695	0.0145959
chr4_+_297699	Strap	0.138656	1.1e-09	2.46056e-08
chr8_-_363160	Stt3b	0.0928737	3.72e-11	1.07157e-09
chr3_+_362283	Stx16	0.160161	0.00145691	0.00763542
chr1_-_60466	Stx7	0.0925017	0.00661089	0.0260788
chr15_+_361071	Sucla2	0.14107	1.18e-07	1.95236e-06
chr3_-_311642	Sulf2	0.0677377	0.000717456	0.00426849
chr1_-_83783	Sult1a1	0.151274	0.00562688	0.0230772
chr20_-_499417	Sumo3	0.0854429	0.00766262	0.0295864
chr10_-_287608	Supt4h1	0.114288	3.84e-06	4.5089e-05
chr10_+_303281	Supt6h	0.136577	1.3e-07	2.10737e-06
chr6_+_366595	Sypl1	0.229973	7.19e-05	0.000588727
chr8_-_25123	Tagln	0.208873	0.000349788	0.00234992
chr3_+_311055	Tanc1	0.0732761	0.00703201	0.0275501
chr10_+_303599	Tanc2	0.424179	1.15e-05	0.000116572
chr1_-_292886	Tbc1d17	0.170775	0.000253471	0.0017774
chr3_+_362237	Tbc1d20	0.0876258	0.000913434	0.00525487
chr1_-_292777	Tbcb	0.114467	8.05e-07	1.11917e-05
chr9_-_316221	Tbcc	0.134866	0.000800207	0.00468425
chrX_+_302711	Tbl1x	0.18808	0.00350279	0.0157586
chr5_-_362479	Tcea1	0.239065	1.33e-13	5.27259e-12
chr5_+_64525	Tceb1	0.0784474	3.85e-05	0.000339546
chr5_-_25562	Tceb3	0.110074	0.00109344	0.00604763
chr7_-_366964	Tcf20	0.199216	8e-05	0.000645806
chr11_-_498095	Tctex1d2	0.252221	0.00119599	0.00648003
chr1_+_84574	Tgfb1i1	0.0752636	0.00344845	0.0155842
chr13_-_81809	Tgfb2	0.095796	1.77e-10	4.57231e-09
chr6_-_25717	Tgfb3	0.0253544	0.0137967	0.0475403
chr5_+_29591	Tgfbr1	0.118214	0.00833823	0.0316576
chr8_-_81810	Tgfbr2	0.218177	0	0
chr14_+_29610	Tgfbr3	0.162231	4.17e-06	4.81172e-05
chr7_+_252928	Timm13	0.0835642	0.0012288	0.00662194
chrX_-_116510	Timp1	0.0382973	2.54e-06	3.11014e-05
chr15_-_290232	Tinf2	0.14164	0.00796319	0.0305116
chr3_-_296279	Tm9sf4	0.205057	2.02e-10	5.15164e-09
chr7_+_362884	Tmbim4	0.169356	4.27e-06	4.89888e-05
chrX_+_24822	Tmbim6	0.0584031	1.54e-10	4.11077e-09
chr6_+_84599	Tmed10	0.198321	0	0
chr10_+_287722	Tmem106a	0.238512	0.00150772	0.00784014
chr4_+_312132	Tmem106b	0.120417	0.00376135	0.0167338
chr16_+_361110	Tmem110	0.156133	0.00105636	0.00591563
chr2_-_499690	Tmem167b	0.0658807	0.00763123	0.0294937
chr14_+_360985	Tmem17	0.30562	0.00054482	0.0034096
chr6_+_362722	Tmem18	0.120919	0.00342093	0.0154948
chr6_-_362711	Tmem214	0.170534	4.14e-06	4.79091e-05
chr9_-_316412	Tmem237	0.220925	7.42e-07	1.04612e-05
chrX_+_308134	Tmem35	0.180564	0.00781694	0.0300952
chr11_-_360698	Tmem50b	0.166684	4.93e-05	0.00041733
chr5_+_362490	Tmem55a	0.156413	5.51e-07	7.93599e-06
chr5_-_500384	Tmem70	0.178987	0.000565749	0.00350878
chr20_+_170898	Tmlhe	0.145003	0.0117392	0.0418555
chrX_+_81814	Tmsb4x	0.200737	0	0
chr6_+_362751	Tmx1	0.0593671	0.000374303	0.00249369
chr4_+_25625	Tnfrsf1a	0.065624	0.00417012	0.0182085
chr1_+_308971	Tnrc6a	0.16378	1.29e-05	0.000126908
chr19_-_266601	Tomm20	0.0635636	8.06e-08	1.39707e-06
chr13_-_304971	Tomm40l	0.200395	0.000949741	0.00542477
chr13_-_246314	Tor1aip1	0.297495	1.54e-10	4.11077e-09
chr3_+_296480	Tpd52l2	0.262681	3.12e-13	1.1461e-11
chr9_+_81815	Tpp2	0.138321	3.01e-06	3.59883e-05
chr4_+_297411.1	Tprkb	0.171367	0.00527658	0.0219849
chr9_-_171086	Trak2	0.248068	1.1e-07	1.84285e-06
chr5_+_312903	Tram1	0.121165	6.22e-11	1.75386e-09
chr20_+_309678	Trappc10	0.272618	1.35e-07	2.1796e-06
chr20_-_309586	Trim26	0.20747	1.1e-05	0.000112357
chr6_-_314393	Trip11	0.154889	0.000655453	0.00394059
chr9_-_316575	Trip12	0.0965374	4.22e-07	6.21209e-06
chr3_-_366012	Trub2	0.115135	0.0143731	0.0490203
chr1_-_308843	Tsku	0.172002	0.00502745	0.0211671
chr13_-_60381	Tsn	0.167393	1.03e-09	2.33001e-08
chr19_-_292095	Ttc13	0.0787349	0.00422867	0.0184039
chr3_-_311224	Ttc17	0.748492	0	0
chr3_-_171572	Ttl	0.105013	0.00278457	0.0130403
chr18_+_307351	Tubb6	0.0466617	0.00266316	0.0125895
chr1_-_309098	Tubgcp2	0.24198	2.61e-05	0.000239141
chr8_+_501052	Tusc2	0.134217	0.000217586	0.00155574
chr6_+_362728	Twistnb	0.167612	0.0033162	0.0150716
chr7_-_79462	Txn2	0.126271	5.92e-07	8.4656e-06
chr17_+_100362805	Txndc5	0.337838	0.000536548	0.00337259
chr18_-_140922	Txnl1	0.0593363	0.00026618	0.00186001
chr4_-_117553	Uba3	0.0928175	0.00204237	0.0100959
chr8_-_300968	Uba5	0.127006	8.13e-10	1.88165e-08
chr2_+_81920	Ube2d3	0.131894	0	0
chr15_+_361013	Ube2e2	0.160313	0.000200457	0.00145404
chr10_-_25573	Ube2i	0.19904	0	0
chr5_+_297961	Ube2j1	0.334806	0	0
chr5_+_298689	Ube2j2	0.107072	3.02e-06	3.59883e-05
chr14_-_289623	Ube2k	0.214409	1.91e-08	3.73056e-07
chr1_-_116725	Ube2n	0.205644	0.00469652	0.0199671
chr5_-_298652	Ube4b	0.146842	4.71e-07	6.85776e-06
chr12_+_363869	Ubl3	0.196229	9.4e-08	1.60844e-06
chr17_+_114590	Ubqln1	0.173722	3.33e-16	1.8018e-14
chr9_+_363188	Ubr2	0.2041	6.96e-06	7.53185e-05
chr5_+_313658	Ubr4	0.121647	0.00200525	0.00992464
chr5_-_313115	Ufl1	0.145574	0.00210977	0.0103778
chr2_-_365797	Ufm1	0.148112	3.23e-10	7.98328e-09
chr7_+_363009	Uhrf1bp1l	0.303409	0	0
chr14_+_289801	Upp1	0.177255	0.000488453	0.00314432
chr3_-_683512	Uqcc1	0.143096	0.0123092	0.0434962
chr5_-_366448	Uqcrh	0.0407462	0.000496665	0.00318693
chr18_-_291796	Usp14	0.0712125	0.00303146	0.0139357
chr11_+_288306	Usp16	0.178634	8.38e-06	8.85317e-05
chr3_+_311856	Usp20	0.257598	2.86e-07	4.30505e-06
chr11_+_304150	Usp25	0.13325	0.0127989	0.0448352
chr5_+_362636	Usp48	0.261639	4.06e-08	7.45699e-07
chr17_-_291309	Usp6nl	0.118358	0.011221	0.0405129
chr10_+_360471	Usp7	0.171519	0.00474938	0.020166
chr2_-_690366	Vangl1	0.371526	8.08e-11	2.23119e-09
chr3_+_60431	Vapb	0.151075	8.7e-08	1.5015e-06
chr7_-_299738	Vezt	0.30955	1.47e-05	0.000142861
chr17_+_81818	Vim	0.0582519	0	0
chr12_+_65081	Vps33a	0.284975	0.00334629	0.0151911
chr16_-_290851	Vps36	0.11827	7.23e-05	0.000590794
chr20_-_25218	Vps52	0.298142	0.000439676	0.00285326
chr4_-_682507	Wasl	0.145292	0.000380884	0.00252463
chr15_-_114765	Wbp4	0.211338	1.03e-07	1.73282e-06
chr12_+_288611	Wbscr17	0.106747	0.0135466	0.0469209
chr14_+_360950	Wdr1	0.102122	2.13e-14	9.58261e-13
chr6_-_362703	Wdr43	0.162219	7.54e-06	8.07224e-05
chr3_-_117538	Wipf1	0.119571	0.000124313	0.000955373
chr12_-_288498	Wipi2	0.161064	1.49e-07	2.39597e-06
chr7_+_65154	Wisp1	0.0934758	4.1e-06	4.75838e-05
chr4_-_116477	Wnk1	0.137322	4.94e-12	1.60811e-10
chr16_+_64566	Wnt5a	0.227371	2.23e-06	2.76437e-05
chr16_+_498630	Wwc2	0.149392	2.51e-06	3.08283e-05
chr2_-_295062	Wwtr1	0.157213	6.72e-12	2.15255e-10
chr14_+_85252	Xpo1	0.0698118	0.0131006	0.0456629
chr15_-_290280	Xpo4	0.214241	0.00221361	0.0108221
chr7_-_314879	Xpot	0.095169	0.00252756	0.0121202
chr8_+_300944	Xrn1	0.294854	2.43e-05	0.000225748
chr6_-_362699	Yipf4	0.0859174	9.87e-05	0.000779477
chr18_-_361315	Yipf5	0.0578422	0.00127958	0.00687711
chr17_-_114217.1	Yme1l1	0.257423	0	0
chr3_-_296467	Ythdf1	0.0873026	0.0055988	0.0229924
chr3_+_56011	Ywhab	0.0775084	0.00052771	0.00334328
chr10_-_29753	Ywhae	0.128094	0	0
chr6_+_24919	Yy1	0.143674	1.12e-07	1.86853e-06
chr2_-_310244	Zc2hc1a	0.0923978	0.00313846	0.0143616
chr6_+_192359	Zc3h14	0.113756	1.59e-06	2.0405e-05
chr3_-_311071	Zeb2	0.250293	5.94e-10	1.39086e-08
chr20_+_361816	Zfand3	0.256523	0	0
chr1_+_361627	Zfp143	0.240947	0.0052845	0.0219949
chr10_-_78972	Zfp354c	0.279705	9.94e-07	1.34459e-05
chr6_+_25165	Zfp386	0.242654	2.34e-07	3.63153e-06
chr9_+_316312	Zfp451	0.214729	0.0002819	0.00195282
chr18_+_291406	Zfp516	0.235689	1.49e-06	1.93073e-05
chr1_+_293038	Zfp592	0.230597	0.00343404	0.0155366
chr5_-_298546	Zfp593	0.163293	0.000226309	0.00161235
chr10_+_266774	Zfp597	0.304976	0.00107354	0.00596756
chr10_+_497967	Zfp830	0.173698	0.014273	0.0488038
chr2_-_365703	Zfr	0.0777315	8.13e-05	0.000653665
chr12_+_498160	Zkscan1	0.166266	0.00140381	0.00740561
chr18_+_679898	Zmat2	0.0918369	0.0062647	0.0251846
chr2_-_64394	Zmat3	0.0848385	0.00907047	0.033974
chr17_-_291259	Zmynd11	0.147161	0.000194686	0.00141582
chr19_-_304655	Zswim4	0.247295	0.00449444	0.0193228
chr4_+_114636	Zyx	0.0793569	6.09e-06	6.77343e-05

## Sheet: 220gene_2y_vs_2w_Shorten
Entez_ID	genesymbol	2y_vs_2w_r	2y_vs_2w_Pvalue	2y_vs_2w_fdr
chr12_+_81822	Actb	-0.00549356	0.0142933	0.0488315
chr9_-_316333	Actr1b	-0.194183	7.39e-08	1.2865e-06
chr20_+_25367	Adarb1	-0.0448221	0.00388791	0.0172585
chr13_+_682999	Aida	-0.0625462	0.00630766	0.0252306
chr20_+_309639	Anks1a	-0.346404	2.62e-06	3.1886e-05
chr2_+_365872	Aph1a	-0.0882139	0.0131595	0.0457781
chr1_+_361653	Armc5	-0.101646	0.012057	0.0427982
chr8_+_363130	Aste1	-0.519803	0.001354	0.00715849
chr1_+_365266	Atp10a	-0.151609	0.000545764	0.0034096
chr1_-_171386	Avpi1	-0.0852979	0.000921463	0.00529345
chr1_-_308444	Axl	-0.14186	0	0
chr1_-_309156	Bbs1	-0.203593	0.00105096	0.00589364
chr4_-_29592	Bcat1	-0.0545158	0.0010736	0.00596756
chr6_-_313876	Birc6	-0.152285	0.000193703	0.00141273
chr17_-_25644	Bmp6	-0.0681321	0.00585536	0.0238503
chr2_-_25203	Ccnb1	-0.379567	2.98e-05	0.000269344
chr1_-_58919	Ccnd1	-0.0581542	0.0104441	0.037982
chr5_+_298686	Ccnl2	-0.0793662	0.00289059	0.0134268
chr20_-_652929	Cd99	-0.33669	0.00427785	0.0185574
chr1_+_293886	Cdc37l1	-0.17677	2.97e-05	0.000269047
chr3_+_24253	Cebpb	-0.0557647	0.00074303	0.00439452
chr1_+_29271	Cfl1	-0.0661762	0.00480136	0.020322
chr3_-_311607	Chd6	-0.278939	0.000130971	0.000995081
chr7_-_81825	Cirbp	-0.187713	1.55e-09	3.42884e-08
chr5_-_295586	Clcn6	-0.323944	0.00134183	0.00710675
chr4_+_84352.1	Col1a2	-0.0582766	0	0
chr9_+_84032	Col3a1	-0.0167147	0.0040761	0.0178564
chr3_+_85490	Col5a1	-0.0593537	4e-10	9.70667e-09
chr11_+_304021	Col8a1	-0.070849	0	0
chr16_+_290637	Colgalt1	-0.0782869	0.00135518	0.00715849
chr2_-_688478	Commd2	-0.127675	0.00242847	0.011687
chr3_-_296285	Commd7	-0.172136	1.12e-06	1.48986e-05
chr6_+_298744	Crim1	-0.0768038	4.6e-13	1.62995e-11
chr6_+_56725	Cript	-0.102307	0.00357382	0.0160242
chr8_-_315707	Csk	-0.278279	7.36e-12	2.33884e-10
chr1_-_64032	Ctgf	-0.00936006	0.00909707	0.0340274
chr1_+_25423	Ctsc	-0.179603	0.00145976	0.00764035
chr7_+_300047	Cyc1	-0.050318	0.00862227	0.0326001
chr2_+_64322	Dap	-0.0699457	1.03e-06	1.38859e-05
chr13_+_364050	Dcaf8	-0.135814	9.15e-06	9.49135e-05
chr5_+_313648	Ddost	-0.0574569	8.96e-05	0.000714658
chr20_-_317399	Ddx21	-0.0834748	0.00918308	0.034172
chr10_+_303607	Ddx42	-0.0931891	0.00725839	0.028271
chr16_+_290660	Ddx49	-0.0831109	0.0142294	0.048738
chr5_-_298541	Dhdds	-0.144226	0.00829611	0.0315756
chr10_-_360583	Dhrs11	-0.294628	0.00882631	0.0332148
chr19_+_84026	Dnaja2	-0.06376	0.00319665	0.0145959
chr8_+_315952	Dzip1l	-0.220419	0.000214357	0.00153539
chr17_-_24323	Edn1	-0.102297	0.00260925	0.012394
chr7_-_300033	Eef1d	-0.0336103	0.00910173	0.0340274
chr1_+_293725	Eef1g	-0.0279398	5.07e-08	9.10326e-07
chr1_+_293692	Ehd1	-0.233787	1e-07	1.68945e-06
chr3_+_499882	Eid1	-0.124732	1.36e-13	5.33867e-12
chr7_+_300253	Eif4b	-0.061861	8.34e-09	1.71248e-07
chr3_-_59317	Epb41l1	-0.176521	0.000158279	0.00118458
chr2_+_294975	Exosc9	-0.155617	0.00355142	0.0159416
chr1_-_54319	Ezr	-0.121873	0.00292695	0.0135486
chr9_-_367235	Fam135a	-0.187118	0.00631629	0.02524
chr3_-_311598	Fam83d	-0.356385	4.52e-05	0.000385066
chr3_-_83727	Fbn1	-0.0474697	0.00216856	0.0106278
chr8_-_300849	Fbxo9	-0.160971	0.00717197	0.0279888
chr3_+_29348	Fgf7	-0.116105	7.78e-06	8.28487e-05
chr14_-_360903	Fgfrl1	-0.122324	0.00296604	0.0136663
chr10_-_303185	Flcn	-0.13956	0.00809783	0.0309682
chr9_-_25661	Fn1	-0.0194625	6.37e-06	6.9878e-05
chr17_-_307128	Frmd4a	-0.0860254	0.00269058	0.0126593
chr2_-_361927	Fxr1	-0.166856	7.35e-06	7.88992e-05
chr2_-_78961	Golph3	-0.0850689	3.18e-06	3.77826e-05
chr20_-_309774	Gopc	-0.14971	0.000515637	0.00327197
chrX_+_60666	Gpd1	-0.0694997	0.00391	0.0173182
chr6_+_64845	Gphn	-0.251613	0.00179358	0.00906753
chr17_+_361196	Habp4	-0.0820363	0.0027128	0.0127489
chr9_-_64474	Hdlbp	-0.0354473	0.00157024	0.00813357
chr11_-_29577	Hes1	-0.0945913	0.0014318	0.00751367
chr10_+_287423	Hes7	-0.44475	0.00120444	0.00651701
chr4_-_368057.1	Hoxa11	-0.119121	0.00287873	0.0133873
chr20_+_64441	Hsf2	-0.159006	0.00262513	0.0124391
chr18_-_291671	Hspa9	-0.182972	6.43e-06	6.99612e-05
chr19_-_494344	Ier2	-0.0423094	0.00619912	0.0249962
chr11_+_303824	Igf2bp2	-0.610006	8.96e-06	9.3184e-05
chr7_+_314730	Ikbip	-0.0716522	0.00725717	0.028271
chr13_-_304817	Ipo9	-0.136517	1.71e-07	2.72782e-06
chr6_-_314329	Irf2bpl	-0.0739271	0.00413135	0.0180786
chr16_+_29376	Irs2	-0.154703	0.000570216	0.00351794
chr10_+_360498	Jmjd8	-0.191529	2.86e-07	4.30505e-06
chr5_-_313539	Kdm4a	-0.18809	3.38e-05	0.000300078
chr8_-_117519	Keap1	-0.169688	0.000220435	0.0015733
chr3_-_29469	Lbp	-0.104654	0.00489303	0.0206446
chr2_+_688413	Lce1m	-0.139827	0.00121982	0.0065913
chr5_-_500564	Ldlrap1	-0.139792	0.00130351	0.0069683
chr20_+_499443	Lims1	-0.0859029	7.1e-05	0.000583745
chr19_-_288913	LOC288913	-0.0707273	0.00320119	0.0145986
chr20_-_294154	LOC294154	-0.0656739	0.0128217	0.0448759
chr12_-_360779	Lrch4	-0.251804	0.0010624	0.00594114
chr19_-_54267	Maf	-0.144708	1.89e-05	0.000179752
chr10_-_64188	Mafg	-0.138953	2.15e-06	2.67348e-05
chr5_-_140808	Manea	-0.203113	0.000566978	0.00350878
chr8_-_58840	Mapk6	-0.0641406	0.0116974	0.0417809
chr6_-_170577	Mark3	-0.146092	0.000969514	0.00552195
chr18_+_29150	Matr3	-0.0958925	6.12e-05	0.000505247
chr6_-_60661	Max	-0.108328	0.00538586	0.0223009
chr3_-_311311	Meis2	-0.127321	0.00119089	0.00646113
chr1_-_308795	Mesdc1	-0.111604	0.0084988	0.0321941
chr10_+_316842	Metrnl	-0.0790817	0.0010113	0.00571927
chr10_+_287918	Mettl23	-0.225124	0.000234564	0.00166524
chrX_-_302864	Mmgt1	-0.129272	0.00651123	0.025891
chr1_-_309440	Mrpl43	-0.121292	3.09e-05	0.000278031
chr4_-_680308	Mthfd2	-0.0735297	0.00162911	0.00838426
chr7_+_89825	Nap1l1	-0.0368958	0.00431237	0.0186667
chr2_+_294930	Nceh1	-0.146866	0.00181497	0.00915259
chr5_-_297990	Ndufb6	-0.0722398	0.0105541	0.0383125
chr1_+_308068	Nkd2	-0.0803634	0.0121396	0.0430151
chr5_+_313777	Noc2l	-0.129133	0.0013145	0.00699903
chr15_+_290235	Nop9	-0.165953	0.000325694	0.00221406
chr8_+_363138	Nprl2	-0.156281	0.0114185	0.0409673
chr19_+_24314	Nqo1	-0.0780505	0.00147752	0.00770311
chr1_-_113984	Nr2f2	-0.0654525	0.000127298	0.000974572
chr1_+_309262	Nsdhl	-0.153137	4.78e-05	0.00040549
chr7_+_299694	Nuak1	-0.116673	2.43e-07	3.75665e-06
chr13_+_289419	Nuak2	-0.170922	6.68e-09	1.3787e-07
chr7_-_362906	Nudcd1	-0.332757	3.92e-12	1.29716e-10
chr10_+_287199	Nudcd2	-0.1228	0.00469755	0.0199671
chr1_-_64313	Oat	-0.0597214	0.00678333	0.0266279
chr9_-_301430	Orc2	-0.13695	0.0100806	0.0369034
chr5_-_54705	Pdp1	-0.187542	0.000794071	0.00465514
chr12_+_688786	Pet100	-0.265403	0.00795362	0.0305041
chr17_+_306814	Phf2	-0.174886	0.00294841	0.0136164
chr9_-_501174	Pid1	-0.0836229	0.0127562	0.0448035
chr2_-_362039	Pla2g12a	-0.495437	8.88e-15	4.2838e-13
chr2_+_25096	Pld1	-0.0792833	0.00732697	0.0284827
chr10_-_303584	Plekhm1	-0.342759	7.23e-07	1.02656e-05
chr2_+_60376	Plrg1	-0.085364	0.0113315	0.0408016
chr12_-_288455	Pomp	-0.0411694	1.4e-05	0.000136722
chr5_+_29411	Ppt1	-0.112289	0.000616233	0.00375555
chr20_+_83471	Prep	-0.105067	0.00064715	0.00390239
chr1_-_85332	Prkcdbp	-0.0431422	0.00229304	0.0111967
chr17_-_291078	Prpf4b	-0.140117	1.91e-05	0.000181224
chr10_-_287710	Ptrf	-0.0332687	0.0010891	0.00603986
chr1_-_292687	Qpctl	-0.138193	0.00655651	0.0260181
chr9_-_367242	Rab23	-0.0937167	0.00997244	0.0366056
chr2_-_25676	Rasa1	-0.140257	0.00153779	0.00797578
chr13_-_304893	Rasal2	-0.184444	0.00658713	0.0260613
chr8_+_29218	Rcn2	-0.0840682	5.68e-06	6.33502e-05
chr9_+_501195	RGD1562136	-0.102129	0.0102442	0.0373567
chrX_-_363487	RGD1566265	-0.159462	1.99e-06	2.52151e-05
chr4_+_26954	Rheb	-0.0606332	0.00140852	0.00742067
chr6_-_64373	Rhob	-0.061886	0.00177751	0.00902048
chr2_+_295342	Rhoc	-0.0848367	3.8e-06	4.47506e-05
chr7_-_362900	Rnf19a	-0.101633	0.00582946	0.023769
chr1_-_317646	Rpl13a	-0.112176	0	0
chr12_-_79449	Rpl21	-0.0378563	5.55e-16	2.96296e-14
chr7_-_64640	Rpl30	-0.0913638	0.000510035	0.00324671
chrX_-_25347	Rpl39	-0.0218109	0.000242738	0.00171113
chr3_-_64701	Rpn2	-0.0230693	0.0146162	0.0497225
chr2_-_29288	Rps3a	-0.0172056	0.000818558	0.00477075
chr5_+_362626	Rsrp1	-0.110275	1.24e-05	0.0001232
chr8_+_140585	Ryk	-0.0592372	0.00660997	0.0260788
chr9_+_316164	Satb1	-0.274152	0.00854928	0.0323547
chr2_-_29521	Scamp1	-0.108966	0.00193966	0.00964771
chr2_+_310710	Sec22b	-0.0959093	2.38e-05	0.000222133
chr4_-_246262	Sema3d	-0.0777618	0.00997419	0.0366056
chr4_-_503568	Slc13a4	-0.554114	2.21e-14	9.83204e-13
chr15_-_305886	Slc22a17	-0.162634	0.00241416	0.0116743
chr3_-_246771	Slc25a25	-0.218981	1.41e-08	2.83701e-07
chr14_-_498358	Slc30a9	-0.0719823	0.00834135	0.0316576
chr5_+_171135	Slc31a1	-0.0739147	0.00673321	0.0264831
chr2_+_310808	Slc35a3	-0.21857	0.000107472	0.000842109
chr7_+_300191	Slc48a1	-0.137038	2.69e-09	5.79073e-08
chr1_-_140915	Slco3a1	-0.257786	0.0061383	0.0248009
chr1_+_361745	Smarca2	-0.103199	0.00268505	0.0126584
chr1_+_29486	Smc3	-0.172302	0.00122639	0.0066179
chr5_+_685634	Smim12	-0.148077	0.00947256	0.0350537
chr10_-_29140	Snn	-0.181435	0.000491661	0.00315989
chr17_-_291060	Snrnp48	-0.138697	0.000530916	0.00334981
chr16_-_114901	Sorbs2	-0.108292	0.00972582	0.0357924
chr3_-_689988	Sox12	-0.153037	0.000357799	0.00239971
chr10_+_140586	Sox9	-0.11445	0.000532408	0.00335183
chr10_-_24791	Sparc	-0.0146054	1.71e-05	0.000164588
chr16_+_680782	Spcs3	-0.0935353	0.00571593	0.0233536
chr6_+_116650	Srp54a	-0.0890446	0.000546794	0.0034096
chrX_+_317181	Srpx2	-0.0651477	0.00401672	0.0176542
chr3_+_81783	Ssb	-0.071942	0.000185329	0.00136408
chr5_+_298681	Ssu72	-0.0779164	0.00129404	0.00692693
chr4_+_312052	Steap2	-0.0719701	0.00363351	0.0162554
chr3_-_296655	Stom	-0.119061	0.000546478	0.0034096
chr9_-_301442	Sumo1	-0.0480489	0.00260702	0.012394
chr5_+_170933	Syf2	-0.196258	9.66e-15	4.55043e-13
chr1_-_64666	Taok2	-0.218808	0.000116916	0.000903729
chr2_+_365755	Tbl1xr1	-0.0905539	0.0122025	0.0431614
chr18_+_307474	Tcerg1	-0.155752	0.000340587	0.00229581
chr4_+_500040	Tes	-0.0901881	0.000566295	0.00350878
chr5_+_29460	Tesk1	-0.202888	0.00111856	0.00617745
chr9_-_316742	Tgif1	-0.170451	0.000631926	0.00383368
chr3_+_445442	Thbs1	-0.0297965	5.57e-14	2.37258e-12
chr5_-_313591	Thrap3	-0.144788	0.00032989	0.00223878
chr8_+_84424	Tle3	-0.122528	0.00630313	0.0252306
chr3_+_311405	Tmem127	-0.0721029	0.00546045	0.0225631
chr1_+_292654	Tmem160	-0.0697833	0.00630716	0.0252306
chr10_+_303004	Tmem8a	-0.139071	3.98e-06	4.63253e-05
chr1_-_293415	Tmem9b	-0.0672534	0.0123189	0.0434962
chr4_+_362301	Tmub1	-0.0977395	0.00402412	0.0176673
chr10_+_287069	Trap1	-0.119938	7.17e-05	0.000588293
chr7_-_299897	Trps1	-0.101125	0.0084603	0.0320786
chr2_+_300218	Tuba1c	-0.0632636	3.77e-10	9.20432e-09
chr7_-_362980	Tubgcp6	-0.311649	0.00102554	0.0057672
chr12_+_50522	Ubc	-0.0171744	0.00267021	0.0126079
chrX_+_298317	Ube2a	-0.109754	0.00141141	0.00742613
chr3_+_295686	Ube2e3	-0.0749577	0.000164515	0.00122787
chr13_+_83586	Usf1	-0.239334	0.000190836	0.00139436
chr8_+_361190	Usp19	-0.132408	0.00133662	0.00708852
chr9_-_363237	Wdr12	-0.113022	0.00658304	0.0260613
chrX_+_63879	Xiap	-0.131588	9.63e-06	9.93776e-05
chr6_-_25577	Ywhaq	-0.0578978	7.96e-07	1.11052e-05
chr19_-_361387	Zfp330	-0.0953604	0.00372836	0.016624
chr18_+_100909408	Zfp397	-0.437037	0.00107363	0.00596756
chr1_-_292569	Zfp444	-0.11815	0.00282052	0.0131597
chr12_+_304337	Zfp68	-0.186795	0.00628414	0.0252269
chr4_-_312303	Zfp746	-0.191198	0.00526368	0.0219539
chr3_+_311791	Zmynd19	-0.277035	0.00053985	0.00338802
chr3_+_311630	Zswim3	-0.239983	2.61e-05	0.000239141

## Sheet: 375gene_PD6_to_PD11_Lengthen
Entez_ID	genesymbol	PD6_to_PD11_r	PD6_to_PD11_Pvalue	PD6_to_PD11_fdr
5_+_52398	Sept11	0.041303	0.000243944	0.00400043
7_+_56372	1110004F10Rik	0.0604001	0.00683973	0.0488663
16_+_69053	1810013L24Rik	0.0861563	0.00185587	0.0187662
8_-_69551	2310022B05Rik	0.0828559	2.42588e-05	0.00062422
10_+_319277	A230046K03Rik	0.0827836	0.000461016	0.00642508
16_+_17250	Abcc1	0.127196	2.56473e-05	0.000654626
X_+_56360	Acot9	0.0594628	0.00433965	0.0352179
12_-_109711	Actn1	0.0218448	0.00104456	0.0121994
12_+_56444	Actr10	0.064022	0.00084087	0.0102505
2_+_11480	Acvr2a	0.10412	0.00102827	0.0120984
16_-_11504	Adamts1	0.0586542	1.08313e-09	9.26517e-08
13_+_108154	Adamts6	0.14958	0.00230998	0.0220878
19_-_110355	Adrbk1	0.12149	0.0039755	0.0329384
4_+_433693	Akirin2	0.0655062	0.00153802	0.016117
9_-_75723	Amotl1	0.10537	4.85006e-06	0.0001599
2_-_17222	Anapc1	0.0812025	0.00539759	0.0415654
9_-_68743	Anln	0.112195	0.00327457	0.0284726
4_+_67628	Anp32b	0.0487904	6.20234e-05	0.00136019
3_+_66471	Anp32e	0.101421	0.000129603	0.00245625
5_+_11745	Anxa3	0.0517332	1.52563e-06	6.03576e-05
14_-_11750	Anxa7	0.0783048	4.32997e-05	0.0010304
18_+_11777	Ap3s1	0.0600717	0.00027457	0.00432345
2_-_11800	Api5	0.0955617	0.00045054	0.00636589
4_-_66408	Aptx	0.173608	0.00189902	0.0191414
11_-_11840	Arf1	0.0384757	8.47499e-05	0.00176033
5_+_231532	Arhgap24	0.126997	0.00308308	0.0274099
4_+_230837	Asap3	0.369255	0.000459949	0.00642508
13_+_66695	Aspn	0.0521774	0.002047	0.0202461
1_-_226641	Atf6	0.124017	0.000230392	0.00383784
7_+_11982	Atp10a	0.118913	0.00421876	0.0343249
5_-_66898	Baiap2l1	0.192014	0.00123717	0.0138
3_+_68183	Bcas2	0.0655304	0.00285537	0.0261192
6_-_12035	Bcat1	0.0758577	0.00333529	0.028921
9_+_80288	Bcl9l	0.165808	0.00165532	0.0169793
10_+_72567	Bclaf1	0.110723	5.2669e-13	6.94572e-11
13_-_544971	Bdp1	0.133619	0.00380711	0.0317929
7_-_12176	Bnip3	0.0711752	0.00288225	0.0262891
6_-_109880	Braf	0.108909	0.0020275	0.0201793
12_+_52592	Brms1l	0.18384	0.000486419	0.00672278
19_+_107182	Btaf1	0.11954	0.0021002	0.0204527
7_-_83962	Btbd1	0.116488	2.1182e-06	7.98108e-05
4_-_70533	Btf3l4	0.0746837	0.000221729	0.00375045
1_-_12227	Btg2	0.116689	2.99618e-07	1.3547e-05
1_+_66882	Bzw1	0.102087	0	0
4_+_320508	Cachd1	0.121904	0.00590536	0.0439669
12_+_12313	Calm1	0.044781	5.6839e-07	2.36704e-05
11_-_12330	Canx	0.0622828	2.23016e-10	2.13892e-08
3_-_12340	Capza1	0.0653556	0.00014891	0.00267784
16_-_52502	Carhsp1	0.090089	7.43662e-05	0.00159033
X_-_12361	Cask	0.0927292	2.78593e-05	0.000699798
11_-_67163	Ccdc47	0.0642091	0.00199224	0.019891
1_+_70829	Ccdc93	0.120606	0.00585978	0.0439313
13_+_66671	Ccnh	0.0806444	0.000541667	0.00729521
5_-_231874	Ccz1	0.109498	0.000531469	0.00718846
2_+_12509	Cd59a	0.112357	2.59048e-08	1.67324e-06
1_-_214498	Cdc73	0.193679	4.57899e-09	3.37035e-07
18_-_12558	Cdh2	0.0405327	4.9167e-05	0.00113586
X_+_18555	Cdk16	0.139504	8.9085e-05	0.0018074
13_-_12572	Cdk7	0.111148	5.99432e-08	3.44946e-06
4_-_12579	Cdkn2b	0.0700342	0.000144719	0.00263239
1_-_108000	Cenpf	0.272098	0.000206504	0.0035715
15_-_223753	Cerk	0.243169	0.000883272	0.0106701
16_+_106143	Cggbp1	0.118829	1.89316e-07	9.07855e-06
5_-_74277	Chic2	0.093045	0.000647048	0.0083588
6_-_12785	Cnbp	0.0467211	5.83096e-06	0.000183143
3_+_71994	Cnn3	0.0593335	1.68113e-06	6.56887e-05
6_-_54160	Copg2	0.257845	0.000695299	0.00894562
8_+_234577	Cpne2	0.12609	0.00313299	0.0277757
1_+_12912	Creb1	0.119336	0.00703919	0.0499218
1_+_433375	Creg1	0.157704	3.42414e-06	0.000119092
3_+_229663	Csde1	0.0504183	2.356e-07	1.09658e-05
12_+_217615	Ctage5	0.125599	0.000156501	0.00279845
14_+_13030	Ctsb	0.0450616	8.63522e-05	0.00176326
13_-_57266	Cxcl14	0.0727373	0.0060015	0.0444842
8_+_66427	Cyb5b	0.0671374	0.00271118	0.0250903
6_-_13063	Cycs	0.031096	0.00543718	0.0416675
8_+_74256	Cyld	0.204467	4.93689e-06	0.000161085
15_+_210998	D15Ertd621e	0.0574809	0.00379566	0.0317811
17_-_76441	Daam2	0.405759	2.8766e-06	0.00010346
11_+_71833	Dcaf7	0.116031	8.82333e-06	0.00026596
18_+_70640	Dcp2	0.190722	0.000359593	0.00536845
8_+_66498	Dda1	0.137139	9.63951e-09	6.6324e-07
3_+_69219	Ddah1	0.0906093	9.68407e-06	0.000289152
1_-_18214	Ddr2	0.0770744	5.38123e-06	0.000172036
13_+_212880	Ddx46	0.102564	0.000812012	0.0100391
1_-_13244	Degs1	0.0390258	0.00064693	0.0083588
6_-_209773	Dennd2a	0.13458	0.00541996	0.0416363
2_+_228836	Dlgap4	0.0698083	0.00106484	0.0123451
4_-_214063	Dnajc16	0.176519	0.00136587	0.0147588
2_+_76233	Dnttip1	0.101634	0.00493799	0.0389744
4_-_67299	Dock7	0.19053	9.84047e-07	3.94242e-05
9_+_74388	Dpp8	0.128942	9.86252e-05	0.0019632
8_-_234663	Dync1li2	0.101211	2.00722e-05	0.000541792
11_-_68097	Dynll2	0.062733	0.000210533	0.00362139
12_-_66266	Eapp	0.105517	0.000279236	0.00437516
8_-_13617	Ednra	0.24563	0.00342224	0.0293534
8_-_112405	Egln1	0.14396	9.53608e-07	3.86945e-05
10_-_13688	Eif4ebp2	0.173407	5.68296e-08	3.33084e-06
7_-_13690	Eif4g2	0.0365238	1.21453e-07	6.33593e-06
1_+_226982	Eif5b	0.0955078	0.000136549	0.00257249
13_+_13723	Emb	0.172788	5.31587e-06	0.000171681
6_-_13807	Eno2	0.228075	0.0047855	0.0382478
17_+_67458	Ergic1	0.123256	1.59539e-13	2.65758e-11
9_+_23871	Ets1	0.0723748	0.00318123	0.0280462
13_-_211446	Exoc3	0.100558	0.00110808	0.0126154
6_-_75914	Exoc6b	0.182816	0.000981572	0.0116792
11_-_53413	Exoc7	0.105712	0.00168211	0.0171738
4_+_14050	Eya3	0.149338	0.00683806	0.0488663
14_+_629059	Fam124a	0.279341	0.00458259	0.0369056
2_-_66960	Fam188a	0.0913163	0.00151817	0.0159635
9_+_72826	Fam76b	0.164186	0.00125649	0.0139049
1_-_67948	Fbxo28	0.119472	0.00159719	0.0166286
6_+_67529	Fgfr1op2	0.116188	2.01995e-05	0.000541792
5_+_66899	Fip1l1	0.150215	6.70958e-11	7.0786e-09
6_-_108655	Foxp1	0.10947	0.00132603	0.014472
10_-_327826	Frs2	0.103894	0.000168709	0.00298304
16_+_14314	Fstl1	0.0449661	4.10045e-07	1.80249e-05
3_+_51886	Fubp1	0.123154	1.56621e-05	0.000434831
8_+_93739	Gabarapl2	0.11251	3.79252e-12	4.44568e-10
10_+_17873	Gadd45b	0.152259	0.0012383	0.0138
5_+_14467	Gbas	0.104486	0.00273831	0.0251941
3_+_14630	Gclm	0.0772436	0.00492789	0.0389744
5_+_67604	Get4	0.117935	6.35137e-05	0.00137686
17_-_11692	Gfer	0.0985259	0.00043695	0.00622949
14_-_66092	Ghitm	0.0772326	4.36647e-08	2.65767e-06
4_-_56809	Gmeb1	0.202528	0.000234054	0.00387844
14_+_23888	Gpc6	0.0930306	0.00523075	0.0404776
9_-_235283	Gramd1b	0.400106	0.000317054	0.004895
16_+_56637	Gsk3b	0.0872822	0.000582512	0.00768188
8_+_68153	Gtf2e2	0.0987398	0.00267286	0.0248082
16_-_66067	Gtpbp8	0.131395	0.00373601	0.0313647
10_+_67933	Hcfc2	0.326191	5.41369e-07	2.28458e-05
1_-_208727	Hdac4	0.211631	0.00206039	0.0202519
9_-_56295	Higd1a	0.122523	0	0
5_-_215114	Hip1	0.208106	0.00057155	0.00756885
3_-_15257	Hipk1	0.0833112	0.00126203	0.0139175
11_-_15374	Hn1	0.0649892	0.00249524	0.0235744
11_-_15384	Hnrnpab	0.0333172	0.00129788	0.0142138
6_+_98758	Hnrnpf	0.0338454	0.00277836	0.0254884
1_-_51810	Hnrnpu	0.0701532	4.98268e-13	6.8566e-11
8_-_320191	Hook3	0.102014	0.000327777	0.00503599
11_+_15417	Hoxb9	0.2849	0.00256892	0.0239136
4_+_72479	Hsdl2	0.125942	0.00354804	0.030187
19_-_73442	Hspa12a	0.168088	0.00382926	0.0318937
11_-_15525	Hspa4	0.0726671	3.22853e-13	4.86585e-11
18_-_15526	Hspa9	0.0654514	1.56541e-14	2.91443e-12
1_+_15528	Hspe1	0.0223209	0.000124945	0.00238224
9_+_67834	Idh3a	0.0561354	0.00606355	0.0447346
13_+_16195	Il6st	0.108282	1.17171e-09	9.75908e-08
8_-_270110	Irf2bp2	0.0885494	2.31334e-06	8.51364e-05
18_+_66307	Isoc1	0.129169	0.000141491	0.00260581
9_+_104099	Itga9	0.369853	0.000269871	0.00427071
6_-_74287	Kcmf1	0.104633	3.41531e-06	0.000119092
7_+_68137	Kdelr1	0.0970663	1.5369e-08	1.03495e-06
11_+_16568	Kif3a	0.162839	0.000303908	0.00471505
4_-_16650	Kpna6	0.0811639	0.0016577	0.0169793
9_-_244864	Layn	0.0937842	0.00061107	0.00799188
3_+_280411	Lix1l	0.0740699	0.000620531	0.00808223
13_-_66890	Lman2	0.165099	4.61853e-14	8.12091e-12
18_-_16948	Lox	0.0416601	0	0
14_-_380916	Lrch1	0.190655	0.00206917	0.0202753
17_+_268977	Ltbp1	0.0864042	0.00292398	0.0265169
6_+_67636	Lyrm5	0.107856	0.0011182	0.0126849
4_+_26409	Map3k7	0.133963	1.66189e-08	1.09581e-06
1_-_17164	Mapkapk2	0.0719505	0.000736698	0.0093528
18_+_212307	Mapre2	0.2071	5.54055e-11	6.04684e-09
7_-_232944	Mark4	0.0874862	0.00419539	0.0343249
9_-_17436	Me1	0.110139	4.45488e-11	5.03561e-09
11_-_327987	Med13	0.155715	4.4829e-06	0.000152183
6_+_50530	Mfap5	0.0487627	0.00029691	0.00462917
5_-_109154	Mlec	0.170824	0	0
17_-_56716	Mlst8	0.306495	7.85081e-05	0.00166764
14_+_17387	Mmp14	0.250653	1.44329e-15	3.80668e-13
1_+_19070	Mob4	0.0933467	4.74194e-06	0.000157982
9_-_17532	Mras	0.194479	0.000146997	0.00265855
11_+_107732	Mrpl10	0.11019	0.000219119	0.00374871
4_-_28028	Mrpl50	0.118863	1.4056e-05	0.000397207
11_+_74026	Msl1	0.22	4.75439e-08	2.83918e-06
11_+_170749	Mtmr4	0.109812	0.000992885	0.0117696
5_+_77521	Mtus2	0.355322	0.00389372	0.0323455
15_+_60315	Myg1	0.171558	0.000374408	0.00550484
17_-_67938	Myl12b	0.0837336	0.00475098	0.038068
19_-_226101	Myof	0.0842178	1.17273e-07	6.29097e-06
10_+_53605	Nap1l1	0.0602387	8.70035e-09	6.11925e-07
18_+_108123	Napg	0.192037	2.39145e-05	0.000620405
9_+_17999	Nedd4	0.057489	5.70296e-10	5.15711e-08
13_-_18003	Nedd9	0.091708	0.00055359	0.00739288
4_+_18027	Nfia	0.155621	0.000122828	0.00237043
10_-_18045	Nfyb	0.116719	0.0032448	0.0283696
15_-_20826	Nhp2l1	0.057813	0.000259903	0.00417971
7_-_233280	Nipa1	0.119038	0.00227939	0.0218947
4_+_66536	Nipsnap3b	0.0914016	0.00323187	0.0283348
19_+_70769	Nolc1	0.102067	6.60609e-06	0.000202993
11_-_217365	Nploc4	0.135106	0.000142025	0.00260581
13_+_18105	Nqo2	0.130989	0.00103818	0.0121698
10_+_22025	Nr2c1	0.166344	0.000756572	0.00946463
13_-_59050	Nsa2	0.0541756	0.00023621	0.00389378
5_-_18196	Nsg1	0.132908	0.000454311	0.00639064
11_+_52653	Nudcd2	0.0601539	0.0056902	0.043292
2_+_53893	Nudt5	0.0809851	0.00591781	0.0439669
10_+_52014	Nus1	0.0510148	0.000930117	0.0111932
7_-_18242	Oat	0.0558375	2.2948e-05	0.000610341
13_+_18295	Ogn	0.0836102	0.00205436	0.0202519
10_-_216440	Os9	0.127939	0.00204355	0.0202461
10_+_237542	Osbpl8	0.109798	0.00228286	0.0218947
4_-_100273	Osbpl9	0.095947	0.000375805	0.00550484
3_-_66357	Ostc	0.0369892	0.00256579	0.0239136
4_-_73162	Otud3	0.186086	0.0025461	0.0238414
15_+_67041	Oxct1	0.0918008	2.76915e-06	0.00010074
15_+_170719	Oxr1	0.110406	2.77998e-10	2.58783e-08
12_+_217893	Pacs2	0.115455	0.0013663	0.0147588
4_+_18491	Pappa	0.0857019	0.00088149	0.0106701
6_+_101187	Parp11	0.200094	0.0064973	0.0470571
7_+_57342	Parva	0.0984713	0	0
11_-_22658	Pcgf2	0.240839	1.37093e-05	0.000390902
16_-_76302	Pcnp	0.0589089	0.000528993	0.00718568
9_-_18571	Pdcd6ip	0.108846	4.32987e-15	9.7886e-13
2_+_228026	Pdk1	0.138363	0.00336941	0.0290577
1_+_18637	Pfdn2	0.0589699	0.00302147	0.027014
3_-_70804	Pgrmc2	0.0570207	0.00301533	0.027014
11_+_268448	Phf12	0.109184	0.00705056	0.0499218
1_+_94227	Pi15	0.188193	0.0036926	0.0311656
9_-_55981	Pigb	0.264861	0.00294846	0.0266625
11_+_327942	Pigl	0.313033	0.000788189	0.00982134
1_+_67556	Pigm	0.112294	0.001105	0.0126154
2_-_18718	Pip4k2a	0.151009	6.23153e-05	0.00136019
4_-_18786	Plaa	0.086476	0.000201234	0.00349948
8_-_83436	Plekha2	0.31992	0.00083759	0.0102505
13_+_20620	Plk2	0.0860382	1.63176e-07	8.06958e-06
2_-_65112	Pmepa1	0.0546429	3.24247e-05	0.000795536
13_+_19012	Ppap2a	0.0532994	6.00931e-06	0.000186465
11_+_19052	Ppp2ca	0.113555	1.29604e-10	1.28186e-08
6_+_232314	Ppp4r2	0.159876	0	0
8_+_21672	Prdx2	0.105356	7.21645e-15	1.52267e-12
3_-_18749	Prkacb	0.0724716	0.00606276	0.0447346
11_+_19084	Prkar1a	0.112611	0	0
14_+_67089	Psmc6	0.0406656	0.000723838	0.00923769
6_-_19242	Ptn	0.0909642	0	0
4_-_19266	Ptprd	0.218117	0.000508555	0.00696786
4_-_433813	Pusl1	0.14387	2.647e-05	0.00067022
11_+_19324	Rab1	0.0414017	1.84867e-05	0.0005044
12_-_19325	Rab10	0.0580251	2.35076e-05	0.000615475
2_+_19334	Rab22a	0.133262	3.19686e-05	0.000790473
1_+_19335	Rab23	0.109661	4.07573e-05	0.000984708
4_+_59021	Rab2a	0.101685	3.66374e-15	8.91979e-13
7_+_19346	Rab6a	0.0415237	0.00619834	0.0452022
6_-_19349	Rab7	0.0512959	0.000556241	0.00739707
5_-_19353	Rac1	0.0809448	1.78857e-13	2.83041e-11
15_-_26934	Racgap1	0.103945	0.000428524	0.00613701
11_+_19401	Rara	0.233975	0.00105419	0.0122666
18_+_66810	Rbm22	0.129953	5.32019e-05	0.00121873
12_+_67039	Rbm25	0.073381	0.00160288	0.0166331
5_+_19664	Rbpj	0.0861499	1.20479e-05	0.000346652
4_+_108911	Rcc2	0.177071	3.6926e-13	5.31231e-11
18_-_13476	Reep5	0.0626245	5.74355e-05	0.00128016
9_+_11848	Rhoa	0.0526435	0.000253195	0.00410954
13_+_19766	Ripk1	0.12958	0.00117588	0.0131974
3_+_67845	Rnf115	0.129732	0.000522465	0.00712759
12_+_19878	Rock2	0.0951987	3.9098e-07	1.74289e-05
14_-_66480	Rpl15	0.0657969	4.00143e-08	2.48324e-06
X_+_110651	Rps6ka3	0.0844172	0.00571083	0.0433448
7_-_66922	Rras2	0.0625728	0.0029966	0.0269833
5_-_208606	Rsrc2	0.0893009	0.0058892	0.0439607
2_+_76246	Rtf1	0.12632	0.00316047	0.027941
16_-_12394	Runx1	0.106887	0.00412986	0.034039
8_+_192174	Rwdd4a	0.126073	8.47469e-05	0.00176033
2_+_20181	Rxra	0.15801	0.00250365	0.0235835
14_+_74480	Samd4	0.0660422	0.00245695	0.0232821
11_+_57230	Sap30bp	0.16866	0.00251277	0.0235991
10_+_20224	Sar1a	0.0684618	4.10884e-09	3.09631e-07
2_-_192166	Sardh	0.201671	0.00109726	0.0125827
9_-_235293	Sc5d	0.172744	2.6549e-08	1.68055e-06
15_-_72193	Scaf11	0.0944187	1.49877e-05	0.000419788
11_+_52892	Sco1	0.21569	0.00273135	0.0251941
6_-_69938	Scrn1	0.13649	0.00108607	0.0124997
1_+_240880	Scyl3	0.172498	0.00108168	0.0124946
3_+_20333	Sec22b	0.1095	3.94286e-09	3.0437e-07
3_+_69276	Sec62	0.0724674	1.09314e-05	0.00032035
10_+_140740	Sec63	0.0653979	9.69197e-05	0.00194146
2_-_26943	Serinc3	0.032939	0.00573154	0.0433979
2_+_56086	Set	0.0770698	0	0
1_-_108735	Sft2d2	0.138926	0.00455469	0.0367745
19_+_94280	Sfxn3	0.118847	4.98648e-07	2.16195e-05
1_+_68549	Sgol2	0.252268	0.00326176	0.0284393
4_-_20481	Ski	0.0614839	0.00419915	0.0343249
15_-_69906	Slc25a32	0.203466	8.50964e-05	0.00176033
6_-_58246	Slc35b4	0.155565	0.000744678	0.0093528
X_+_102857	Slc6a8	0.156337	7.01537e-08	3.96494e-06
18_-_17128	Smad4	0.112666	1.06955e-05	0.000316367
11_+_103677	Smg6	0.215977	0.000548989	0.0073625
9_+_66069	Snupn	0.174653	0.00446707	0.0361593
18_+_67804	Snx2	0.0682433	0.000111802	0.00218429
18_-_54607	Socs6	0.127572	5.84439e-06	0.000183143
17_-_20662	Sos1	0.169455	5.62751e-05	0.00127222
11_-_78912	Sp2	0.201457	0.00419329	0.0343249
2_-_20687	Sp3	0.176419	0.000120572	0.00234116
11_+_70834	Spag9	0.0789572	0.000142435	0.00260581
3_+_229285	Spg20	0.151835	1.22114e-07	6.33593e-06
18_+_67222	Srfbp1	0.128506	0.00487121	0.03864
5_+_109552	Sri	0.0581042	0.000366802	0.00542652
12_+_24067.1	Srp54a	0.054236	0.000123588	0.00237065
5_+_66661	Srp72	0.100113	2.60839e-07	1.19646e-05
5_-_20817	Srpk2	0.149804	0.000180327	0.00315323
2_+_67996	Srsf6	0.0506713	0.000439159	0.0062329
2_+_20823	Ssb	0.0569026	0.000377425	0.00550484
7_+_170460	Stard5	0.235247	0.00320213	0.0281521
17_-_268980	Strn	0.106769	0.00506975	0.0396192
2_+_228960	Stx16	0.133871	0.00143402	0.0153014
15_-_20024	Sub1	0.0381011	0.00102428	0.0120964
14_+_20916	Sucla2	0.0667898	0.000809591	0.0100391
1_-_22218	Sumo1	0.0341992	0.00211253	0.0205097
2_-_20932	Surf4	0.0638032	3.11166e-06	0.000110656
4_+_68592	Syf2	0.100552	8.56678e-05	0.00176064
4_+_68828	Sync	0.138167	0.00514729	0.0399294
5_+_57915	Tbc1d1	0.14928	4.45068e-05	0.00105122
7_-_233204	Tbc1d17	0.178961	0.000409019	0.00591117
1_+_21399	Tcea1	0.0985535	0.000827098	0.0101859
X_-_66684	Tceal8	0.0412916	0.000106226	0.00208824
17_-_67673	Tceb2	0.0518371	2.353e-05	0.000615475
4_-_27224	Tceb3	0.0892901	0.000743561	0.0093528
5_+_54723	Tfip11	0.153488	0.000495445	0.00681775
11_+_21833	Thra	0.144016	0.0033864	0.0291249
16_-_21844	Tiam1	0.152868	0.00134324	0.0146095
3_-_17112	Tm4sf1	0.0748276	0.00290932	0.0264598
12_-_68581	Tmed10	0.141987	1.11022e-16	3.19441e-14
6_+_71900	Tmem106b	0.119518	6.63298e-10	5.8315e-08
6_-_101118	Tmem168	0.114783	0.000842061	0.0102505
19_+_74493	Tnks2	0.0767083	0.00154295	0.016117
1_-_21961	Tns1	0.130982	3.02064e-09	2.45137e-07
8_-_67952	Tomm20	0.0327249	0.00025085	0.00409247
1_-_14897	Trip12	0.070851	0.000358803	0.00536845
3_+_72033	Tsc22d2	0.151616	0	0
19_-_70387	Ttc9c	0.173148	9.98251e-05	0.00197467
11_-_22210	Ube2b	0.0439332	0.00683013	0.0488663
3_+_66105	Ube2d3	0.0611239	8.98165e-11	9.16997e-09
6_-_22214	Ube2h	0.0818326	0.000226098	0.00378624
17_-_22196	Ube2i	0.0947737	8.88178e-15	1.75693e-12
16_-_22195	Ube2l3	0.0692418	9.87998e-08	5.39141e-06
13_-_56085	Ubqln1	0.0558807	0.00171969	0.0175011
17_-_66530	Ubxn6	0.0922402	0.00587139	0.0439313
16_+_224111	Ubxn7	0.201483	1.8221e-06	6.94814e-05
1_+_56207	Uchl5	0.100778	2.20827e-06	8.22257e-05
4_+_22234	Ugcg	0.0291708	0.00336713	0.0290577
4_+_329908	Usp24	0.177502	1.72973e-06	6.67633e-05
X_+_22284	Usp9x	0.0492763	0.00172905	0.0175399
11_-_216987	Utp6	0.128088	0.00022214	0.00375045
1_-_67883	Uxs1	0.136278	0.000337192	0.00515562
17_-_68915	Vars2	0.274401	0.000222775	0.00375045
5_+_56433	Vps29	0.0515525	0.00611578	0.045015
5_-_77573	Vps33a	0.144586	0.000260159	0.00417971
8_+_70160	Vps36	0.0810978	0.000955944	0.0114172
14_+_218914	Wapal	0.0696003	0.00558965	0.0427325
14_-_22380	Wbp4	0.09647	0.00236615	0.0225568
X_-_73447	Wdr13	0.184641	0.000355917	0.00536845
1_-_226757	Wdr26	0.044534	0.00563526	0.0429774
3_+_70465	Wdr77	0.0636108	0.00530329	0.0409388
5_+_74781	Wipi2	0.0633025	0.00207605	0.02028
14_+_22418	Wnt5a	0.123371	2.25279e-07	1.06419e-05
7_-_101543	Wtip	0.121684	0.0035819	0.0303934
11_+_103573	Xpo1	0.0673309	0.00238069	0.0226273
9_-_22601	Yap1	0.111609	7.47584e-06	0.00022751
10_-_64050	Yeats4	0.138517	0.00300098	0.0269833
18_-_67180	Yipf5	0.0708768	3.45351e-05	0.000840796
12_-_22630	Ywhaq	0.0546956	5.33574e-07	2.28211e-05
15_-_22631	Ywhaz	0.0310297	0.00115955	0.0130605
3_-_22724	Zbtb7b	0.127615	5.73616e-05	0.00128016
17_+_21769	Zfand3	0.106878	1.39117e-07	7.10172e-06
2_-_20402	Zfp106	0.128909	1.56939e-07	7.88432e-06
1_+_226442	Zfp281	0.107237	0.00014179	0.00260581
13_+_26919	Zfp346	0.217004	0.0012878	0.0141524
7_-_22695	Zfp36	0.119495	0.00406795	0.0336164
18_+_69256	Zfp397	0.205484	0.00196195	0.019713
14_-_219105	Zmym5	0.157985	0.00694127	0.0493688
4_-_414872	Zyg11b	0.148234	4.13221e-05	0.000990791
3_+_108946	Zzz3	0.095147	0.000416457	0.00599129

## Sheet: 73gene_PD6_to_PD11_Shorten
Entez_ID	genesymbol	PD6_to_PD11_r	PD6_to_PD11_Pvalue	PD6_to_PD11_fdr
7_+_72244	1600014C10Rik	-0.15201	0.00512929	0.0398875
16_-_23794	Adamts5	-0.0429387	0.00150514	0.0159323
5_-_81702	Ankrd17	-0.0731378	4.63209e-05	0.00108597
9_-_56503	Ankrd49	-0.14098	0.0030374	0.0270799
19_-_67979	Atad1	-0.0914541	0.00197073	0.0197385
1_+_108147	Atic	-0.185538	6.78599e-05	0.00146106
2_-_269336	Ccdc32	-0.142118	0.00370629	0.0311979
11_-_104625	Cnot6	-0.11154	0.00124272	0.0138007
2_+_12831	Col5a1	-0.0417747	8.44599e-09	6.07536e-07
16_-_12837	Col8a1	-0.0337881	0.00577109	0.043593
11_+_69802	Cox11	-0.123489	0.00621262	0.0452022
5_-_68033	Cox19	-0.129773	0.00613197	0.0450257
9_-_12988	Csk	-0.235343	8.68194e-13	1.09913e-10
17_-_28106	D17Wsu104e	-0.14125	3.89455e-09	3.0437e-07
7_-_76375	Det1	-0.224484	0.00686863	0.0489622
8_-_50768	Dlc1	-0.0618262	0.00148659	0.0157888
17_+_13177	Eci1	-0.140007	0.00035769	0.00536845
2_+_58521	Eid1	-0.0717339	4.51981e-06	0.000152183
19_-_66583	Exosc1	-0.0931082	0.00638565	0.0463546
3_+_50911	Exosc9	-0.0952937	1.12957e-05	0.00032799
5_-_64339	Fndc4	-0.25433	0.000715316	0.00916589
6_+_317758	Gimap9	-0.500615	0.00059905	0.00786719
12_+_27277	Golga5	-0.114332	0.00620389	0.0452022
X_-_14735	Gpc4	-0.0360194	0.00115268	0.0130294
11_-_15081	H3f3b	-0.0283863	0.00141023	0.0151815
1_-_110611	Hdlbp	-0.0303718	0.00219541	0.0212491
13_-_15212	Hexb	-0.0979947	0.000947128	0.0113548
5_-_15289	Hmgb1	-0.0864705	1.39266e-12	1.6953e-10
13_-_77134	Hnrnpa0	-0.0578704	0.000264156	0.0042225
7_+_16190	Il4ra	-0.0695242	0.00366186	0.0309887
14_+_70572	Ipo5	-0.0633005	2.99305e-05	0.000745906
18_-_106931	Kctd1	-0.190945	0.00501123	0.0394541
1_-_226519	Lamc1	-0.102711	0.00143586	0.0153014
19_-_72199	Mms19	-0.165179	9.684e-05	0.00194146
10_+_59012	Moxd1	-0.216052	0.00224728	0.0216849
13_+_94066	Mrpl36	-0.0841218	0.00506833	0.0396192
16_-_18100	Mrpl40	-0.119026	0.000350578	0.00533452
11_+_67212	Mrpl55	-0.155085	0.000743852	0.0093528
11_-_18102	Nme1	-0.0427578	4.70859e-05	0.00109579
18_+_67869	Paip2	-0.0670289	6.11566e-05	0.00135357
16_-_208177	Phldb2	-0.0453366	0.000266496	0.00423848
2_+_140484	Pofut1	-0.166487	0.0065198	0.0471078
12_+_19042	Ppm1a	-0.0863767	0.0015113	0.0159442
19_+_18938	Ppp1r14b	-0.0486052	0.000396837	0.00576141
7_-_57296	Psmd8	-0.0304465	0.00486604	0.03864
19_+_19211	Pten	-0.056253	0.00486221	0.03864
18_+_19290	Pura	-0.117438	1.74126e-05	0.000479226
4_-_67830	Rer1	-0.0418173	0.00348315	0.0297148
17_+_67045	Riok2	-0.110946	0.000462849	0.00642508
12_+_20135	Rrm2	-0.0756892	4.47959e-06	0.000152183
9_+_20187	Ryk	-0.10926	1.71909e-07	8.37064e-06
3_-_99683	Sec24b	-0.0654047	0.0016159	0.0167134
11_-_20335	Sec61g	-0.0379168	0.000161508	0.00287175
11_-_67863	Slc25a11	-0.0832872	8.38702e-05	0.00176033
3_-_229782	Slc35a3	-0.254611	9.57029e-08	5.31403e-06
19_+_67155	Smarca2	-0.111272	0.00706829	0.0499356
11_-_57376	Smarce1	-0.0529831	0.00506924	0.0396192
13_+_67797	Snrnp48	-0.0786282	0.00420831	0.0343249
17_-_20815	Srpk1	-0.0872692	0.00142957	0.0153014
13_-_107513	Ssr1	-0.0593942	5.3524e-05	0.00121873
2_-_56324	Stam2	-0.0965535	0.0058135	0.0438089
1_+_20846	Stat1	-0.146047	0.000179451	0.00315323
2_+_21353	Tank	-0.0857773	0.00464535	0.0373161
6_+_52440	Tax1bp1	-0.0689382	0.000139469	0.00260581
17_-_21678	Tead3	-0.152165	0.00508409	0.0396333
11_-_103694	Tmed4	-0.146051	7.07514e-07	2.90816e-05
1_+_67534	Ttll4	-0.203948	0.00165316	0.0169793
14_+_22334	Vdac2	-0.0313838	0.00675191	0.0485677
6_-_232334	Vgll4	-0.376355	0.00614569	0.0450257
1_-_20479	Vps4b	-0.0874551	0.00346805	0.0296658
14_-_65246	Xpo7	-0.109981	0.00584933	0.0439313
7_+_65020	Zfp110	-0.138056	0.000366911	0.00542652
16_+_22661	Zfp148	-0.0834563	0.00653407	0.0471078

## Sheet: Column_description
Entez_ID:	The chromosome, strand and Entrez ID of the gene where the pA located.
genesymbol:	Official gene symbol.
PD11_vs_PD6_r:	The pearson crrelation r between PD11 passage and PD6 passage of MEFs,which named as tandem UTR isoform index, TSI. please see details in the Methods part of the manuscripts.
PD11_vs_PD6_Pvalue:	P value for comparing between PD11 pasage and PD6 passage obtained by linear trend test.please see details in the Methods part of the manuscripts.
PD11_vs_PD6_fdr:	Fdr value for comparing between PD11 pasage and PD6 passage obtained by linear trend test. please see details in the Methods part of the manuscripts.
2y_vs_2w_r:	The pearson crrelation r between aortic vascular smooth muscle cells of 2 years and 2 weeks old Rats.
2y_vs_2w_Pvalue:	P value for comparing between aortic vascular smooth muscle cells of 2 years and 2 weeks old Rats.
2y_vs_2w_fdr:	Fdr value for comparing between aortic vascular smooth muscle cells of 2 years and 2 weeks old Rats.
PD6_to_PD11_r:	The pearson crrelation r from PD6 passage to PD11 passage of MEFs,which named as tandem UTR isoform index, TSI.
PD6_to_PD11_Pvalue:	P value for comparing from PD6 passage and PD11 passage obtained by linear trend test.
PD6_to_PD11_fdr:	Fdr value for comparing from PD6 passage to PD11 passage obtained by linear trend test.
