# Supplementary material for: 3′ UTR lengthening as a novel mechanism in regulating cellular senescence
Source: Genome Res. 2018 Mar;28(3):285–94. doi: 10.1101/gr.224451.117 (PMC5848608; doi:10.1101/gr.224451.117)
Supplement: Supplemental Material [file supp_gr.224451.117_Supplemental_Table_S9.xlsx]

## Sheet: 1
引物唯一名称	引物序列	填写引物序列来源物种或载体	用途(全长、3RACE、luciferase、qPCR、shRNA、载体引物、cas9、其他）	持有人
M_Rpsa_F	GTGGCACCAACCTTGACTTT	mouse	QPCR	陈蒙
M_Rpsa_R	GGATTCTCGATGGCAACAAT	mouse	QPCR	陈蒙
M_Ccne1(cyclin E1)_F	CCTCCAAAGTTGCACCAGTT	mouse	QPCR	陈蒙
M_Ccne1(cyclin E1)_R	CACCCGTGTCGTTGACATAG	mouse	QPCR	陈蒙
M_CCND2 (Cyclin D2)_F	TCCCGCAGTGTTCCTATTTC	mouse	QPCR	陈蒙
M_CCND2 (Cyclin D2)_R	CCAAGAAACGGTCCAGGTAA	mouse	QPCR	陈蒙
M_Nf1_F	CTCAGAATTCCCCTCACAGC	mouse	QPCR	陈蒙
M_Nf1_R	AAACATGGCACTTCCTACGG	mouse	QPCR	陈蒙
M_p53(Trp53)_F	CACGTACTCTCCTCCCCTCA	mouse	QPCR	陈蒙
M_p53(Trp53)_R	CTCCGTCATGTGCTGTGACT	mouse	QPCR	陈蒙
M_ P21(CDKN1A)_F	CGGTGGAACTTTGACTTCGT	mouse	QPCR	陈蒙
M_ P21(CDKN1A)_R	CAGGGCAGAGGAAGTACTGG	mouse	QPCR	陈蒙
M_p16(CDKN2A)_F	CGAGGACCCCACTACCTTCT	mouse	QPCR	陈蒙
M_p16(CDKN2A)_R	TCGCACGATGTCTTGATGTC	mouse	QPCR	陈蒙
M_p15(CDKN2B)_F	TTACCAGACCTGTGCACGAC	mouse	QPCR	陈蒙
M_p15(CDKN2B)_R	GCAGATACCTCGCAATGTCA	mouse	QPCR	陈蒙
M_ANLN_S_F	AAGCTGCTGGGGCTACTCCTT	mouse	QPCR	陈蒙
M_ANLN_S_R	AAATTTCAAGGAGGCATTGG	mouse	QPCR	陈蒙
M_ANLN_L_F	CCCCTTAAAGGTTGTCTCAG	mouse	QPCR	陈蒙
M_ANLN_L_R	CATACATGGCCTCTCTTTCAC	mouse	QPCR	陈蒙
M_Anp32b_S_F	GGACTGCTCATGGATTTGGT	mouse	QPCR	陈蒙
M_Anp32b_S_R	CAGGCTTGGTGGTGGATTAC	mouse	QPCR	陈蒙
M_Anp32b_L_F	TGGGTCTGTTTTCTCATGC	mouse	QPCR	陈蒙
M_Anp32b_L_R	GCTTAGTCTTAGAAAATACGG	mouse	QPCR	陈蒙
M_BCLAF1_S_F	TCTCAAGATTGCAACAGGGA	mouse	QPCR	陈蒙
M_BCLAF1_S_R	CAATACAATTTTCAACATAC	mouse	QPCR	陈蒙
M_BCLAF1_L_F	ACAAGTGCCAGGAAAACGAC	mouse	QPCR	陈蒙
M_BCLAF1_L_R	TGGGAAAATCCTTTGGTTCA	mouse	QPCR	陈蒙
M_BNIP3_S_F	CTAGCATGGTCCTTGGGTGT	mouse	QPCR	陈蒙
M_BNIP3_S_R	AGGCATCAGTCTGACATGCTT	mouse	QPCR	陈蒙
M_BNIP3_L_F	GCGTGCGGGTTATCTGTAAA	mouse	QPCR	陈蒙
M_BNIP3_L_R	GACCACCCAAGGTAATGGTG	mouse	QPCR	陈蒙
M_Calm1_S_F	AGAGAATGGGGGAAGGCTAA	mouse	QPCR	陈蒙
M_Calm1_S_R	GGATTTGGTGACAGCCTTGT	mouse	QPCR	陈蒙
M_Calm1_L_F	AGCTGGCGGTCACCTACTTA	mouse	QPCR	陈蒙
M_Calm1_L_R	CGATATAGGGGAGGAGCACA	mouse	QPCR	陈蒙
M_Canx_S_F	TCACCATCAACAGGTTCCAG	mouse	QPCR	陈蒙
M_Canx_S_R	CACTAGTTAGTTGCTTCATG	mouse	QPCR	陈蒙
M_Canx_L_F	TTTCTCCAGAGGTGGTCCAG	mouse	QPCR	陈蒙
M_Canx_L_R	GCATTCCACCCTCAAAAGAA	mouse	QPCR	陈蒙
M_Cdh2_S_F	GAAGCACTGGGATTTATGTGC	mouse	QPCR	陈蒙
M_Cdh2_S_R	GTGGGTTGAAGCGTATCACA	mouse	QPCR	陈蒙
M_Cdh2_L_F	GGTACTGGCAGCACTAGCAA	mouse	QPCR	陈蒙
M_Cdh2_L_R	ACACAACACAGACGCAAAGC	mouse	QPCR	陈蒙
M_Ets1_S_F	ACCCTGCTGAGACCTTTCAA	mouse	QPCR	陈蒙
M_Ets1_S_R	GGTCCTGACCTCCTCTTTCC	mouse	QPCR	陈蒙
M_Ets1_L_F	TAACCTGTGTGGCTGGCTTT	mouse	QPCR	陈蒙
M_Ets1_L_R	GCTGGTCTCCAAAGTGAGGA	mouse	QPCR	陈蒙
M_Fubp1_S_F	GGATGCAGACGACTTGATGA	mouse	QPCR	陈蒙
M_Fubp1_S_R	CCTCCTATCAGTAGTGATAG	mouse	QPCR	陈蒙
M_Fubp1_L_F	ATGCTCGATGCATTTTCGTC	mouse	QPCR	陈蒙
M_Fubp1_L_R	CCAAGCTGCATCTCCCTAAG	mouse	QPCR	陈蒙
M_Gabarapl2_S_F	CCCTTGCTGGGCTAGGTG	mouse	QPCR	陈蒙
M_Gabarapl2_S_R	TCCAGTTACAAATGCACTAG	mouse	QPCR	陈蒙
M_Gabarapl2_L_F	GTGCACTGTCCTCATGGCTA	mouse	QPCR	陈蒙
M_Gabarapl2_L_R	CCCTCCTTTTCCCTTTACCA	mouse	QPCR	陈蒙
M_LTBP1_S_F	TTGAGTGAACCCCCAAAGAC	mouse	QPCR	陈蒙
M_LTBP1_S_R	TGTCCTGCCTCTTTTCCACT	mouse	QPCR	陈蒙
M_LTBP1_L_F	AATGCGTGGATTCTCTTTGG	mouse	QPCR	陈蒙
M_LTBP1_L_R	CTTCCAGCCCTCTTCAAATG	mouse	QPCR	陈蒙
M_Map3k7_S_F	AGGCTTGAGCTGAGCTATCG	mouse	QPCR	陈蒙
M_Map3k7_S_R	TAAAAGCATGGGAAGGCAAC	mouse	QPCR	陈蒙
M_Map3k7_L_F	CCACCATAGAAGCCCCTGTA	mouse	QPCR	陈蒙
M_Map3k7_L_R	GAGTGGGCAGTTCTCACACA	mouse	QPCR	陈蒙
M_Mmp14_S_F	TGTCTGGGTGCTGTTGGTTA	mouse	QPCR	陈蒙
M_Mmp14_S_R	GTACCATGACCGCCTTCAGT	mouse	QPCR	陈蒙
M_Mmp14_L_F	AATGCCATTCAAATCGTTCC	mouse	QPCR	陈蒙
M_Mmp14_L_R	TTGGAAAGGTTGAACAAGGTC	mouse	QPCR	陈蒙
M_Nap1l1_S_F	GCACGGTGACATCATTTGAG	mouse	QPCR	陈蒙
M_Nap1l1_S_R	CCTAGGGTTTGTTCACCTTGC	mouse	QPCR	陈蒙
M_Nap1l1_L_F	CCAGACTAGCGCACTCTTCC	mouse	QPCR	陈蒙
M_Nap1l1_L_R	CCATTTGGGGACTGACAGAT	mouse	QPCR	陈蒙
M_Nedd4_S_F	GAGCCTTACAGGCGATTCTG	mouse	QPCR	陈蒙
M_Nedd4_S_R	TGGAGCTTGTTTCGTGTTTG	mouse	QPCR	陈蒙
M_Nedd4_L_F	GTGTCGTCCCCAGAACTCAT	mouse	QPCR	陈蒙
M_Nedd4_L_R	GGGACACCAGGTTCTGTGAT	mouse	QPCR	陈蒙
M_Nolc1_S_F	GTTGTGACAAGGACGGTGTG	mouse	QPCR	陈蒙
M_Nolc1_S_R	CCACAGAACAGGAAGGCAAT	mouse	QPCR	陈蒙
M_Nolc1_L_F	ACCGCAGGAAGTAAAGAGCA	mouse	QPCR	陈蒙
M_Nolc1_L_R	CGGTATCCGTTTCTCACCAG	mouse	QPCR	陈蒙
M_PARVA_S_F	TCTGTAGGCTCTGGGGACTG	mouse	QPCR	陈蒙
M_PARVA_S_R	CTGTCTCTGGGCTGTGTTGA	mouse	QPCR	陈蒙
M_PARVA_L_F	GAGAGACAAGGCCACAGGAG	mouse	QPCR	陈蒙
M_PARVA_L_R	TTAACTTCGGGGGAAAGACC	mouse	QPCR	陈蒙
M_Pdcd6ip_S_F	CTCGTGAGATTCTGCTGCTG	mouse	QPCR	陈蒙
M_Pdcd6ip_S_R	AGCCATCTTTGTCCCAACTG	mouse	QPCR	陈蒙
M_Pdcd6ip_L_F	TTGGTTGGCTAGTGGGAGTT	mouse	QPCR	陈蒙
M_Pdcd6ip_L_R	CTTGTGCCCGGTTCTACACT	mouse	QPCR	陈蒙
M_Rab23_S_F	TTTTCTGAAGCCCTGCAACT	mouse	QPCR	陈蒙
M_Rab23_S_R	TTCCCCTTCTTTCCCATACC	mouse	QPCR	陈蒙
M_Rab23_L_F	GGTATGGCCCTCCTGTCTTT	mouse	QPCR	陈蒙
M_Rab23_L_R	CAGCCCACACATCTCTCTGA	mouse	QPCR	陈蒙
M_ROCK2_S_F	GGCAGCTTTACCCATTTTGA	mouse	QPCR	陈蒙
M_ROCK2_S_R	TGTGCACTACTTTCCCCACA	mouse	QPCR	陈蒙
M_ROCK2_L_F	AGAGGGCTTTGCTCAGTTCA	mouse	QPCR	陈蒙
M_ROCK2_L_R	ATGCTGCCTAACGCATCTCT	mouse	QPCR	陈蒙
M_RRAS2_S_F	CTAACAACTGCCAGGGAAGC	mouse	QPCR	陈蒙
M_RRAS2_S_R	TTGCCAGCTTCTTGGTGTAA	mouse	QPCR	陈蒙
M_RRAS2_L_F	CGGATATGCTTCCACCTTGT	mouse	QPCR	陈蒙
M_RRAS2_L_R	ACTTCGCACTCTCGTCCTGT	mouse	QPCR	陈蒙

## Sheet: Sheet2
Primer name	Sequence (from 5′ to 3′)	Species	Usage
Gapdh_F	GTGTTCCTACCCCCAATGTGT	Mouse	qRT-PCR
Gapdh_R	ATTGTCATACCAGGAAATGAGCTT	Mouse	qRT-PCR
Mki67_F	ATCATTGACCGCTCCTTTAGGT	Mouse	qRT-PCR
Mki67_R	GCTCGCCTTGATGGTTCCT	Mouse	qRT-PCR
p16_F	CGCAGGTTCTTGGTCACTGT	Mouse	qRT-PCR
p16_R	TGTTCACGAAAGCCAGAGCG	Mouse	qRT-PCR
Cstf2_F	GCACCTCCTATGATGCAAGC	Mouse	qRT-PCR
Cstf2_R	GCAGGGGCTAAGGAACCAG	Mouse	qRT-PCR
M_Rras2_S_F	CTAACAACTGCCAGGGAAGC	Mouse	qRT-PCR,3'RACE
M_Rras2_S_R	TTGCCAGCTTCTTGGTGTAA	Mouse	qRT-PCR
M_Rras2_L_F	CGGATATGCTTCCACCTTGT	Mouse	qRT-PCR,3'RACE
M_Rras2_L_R	ACTTCGCACTCTCGTCCTGT	Mouse	qRT-PCR
Rras2_CDS_F	CCG GAATTC ATGGCCGCGGCCGGCTGG	Mouse	Overexpression Vector
Rras2_CDS_R	CGCGGATCCGAAAATGACACAATGGCAGC	Mouse	Overexpression Vector
Rras2_L/S_Xhol_F	CCGCTCGAG GAGTCCCTTGAGGTTTAGCT	Mouse	Luciferase assay
Rras2_S_Pmel_R	AGCTTTGTTTAAACGGAAGCATGATAACAAAGGC	Mouse	Luciferase assay
Rras2_L_Pmel_R	AGCTTTGTTTAAACAAGGAGCCGTCAAGCGTCGT	Mouse	Luciferase assay
Rras2_L_truncated_R1	AGCTTTGTTTAAACGCTTTAGCTTGTGTGGGTTTTC	Mouse	Luciferase assay
Rras2_L_truncated_R2	AGCTTTGTTTAAACACAAGGTGGAAGCATATCCG	Mouse	Luciferase assay
Rras2_L_truncated_R3	AGCTTTGTTTAAACACTTCGCACTCTCGTCCTGT	Mouse	Luciferase assay
Rras2_L_truncated_R4	AGCTTTGTTTAAACGCTTAAACACAATCCACAGAG	Mouse	Luciferase assay
Rras2_L_truncated_R5	AGCTTTGTTTAAACGTCTCAAAATCAGGAGCGCA	Mouse	Luciferase assay
Rras2_L_truncated_R6	AGCTTTGTTTAAACCCACTGTGCAATACCACTGA	Mouse	Luciferase assay
Rras2_L_truncated_R7	AGCTTTGTTTAAACGGGGCTGTTGTACACATTCA	Mouse	Luciferase assay
Rras2_L_truncated_R8	AGCTTTGTTTAAACCCTGAAGCTATACAAGGGTCCA	Mouse	Luciferase assay
Tra2b qpcr_F	ATCTCGCTCGCATAGACGAT	Mouse	qRT-PCR
Tra2b qpcr_R	AGACAACAGTTGGGGTCAGG	Mouse	qRT-PCR
Rras2_3Mut-tra2b F	CCC ATTAAAGTTGATCTGTTGTCACC	Mouse	Luciferase assay
Rras2_4Mut-tra2b F	CCC GTTAAAGTTGATCTGTTGTCACC	Mouse	Luciferase assay
Human TRA2B-CDS F	CCG GAATTCATGAGCGACAGCGGCGAGCA	Human	Overexpression Vector
Human TRA2B-CDS R	CGCGGATCCATAGCGACGAGGTGAGTATG	Human	Overexpression Vector
Human TRA2B_qPCR F	GACCAGCAGTCTAGGCGTTC	Human	qRT-PCR
Human TRA2B_qPCR R	CGAGAGCTGCCATAGGTAGG	Human	qRT-PCR
H_RRAS2_CDS_F	GCACGGCAGCTTAAGGTAAC	Human	qRT-PCR
H_RRAS2_CDS_R	CAATGGCAGCCTTTCTTGTCT	Human	qRT-PCR
H_RRAS2_3UTR_Short_F	GGAAACACTAAGGCTGCTTCA	Human	qRT-PCR
H_RRAS2_3UTR_Short_R	GCTTGGCAAACAGCTTAGAT	Human	qRT-PCR
H_RRAS2_3UTR_Long_F	TGTACCCATCTTTGGCCAGT	Human	qRT-PCR
H_RRAS2_3UTR_Long_R	CAAAATCAGATGCCATCCACAG	Human	qRT-PCR
H_RRAS2_L/S_Luci_Xhol_F	CCGCTCGAGTCCCTTCAGTTTTAGCTACC	Human	Luciferase assay
H_RRAS2_S_ Luci_Pmel_R	AGCTTTGTTTAAACGTAGGAGTAGTAACACAGGG	Human	Luciferase assay
H_RRAS2_L_ Luci_Pmel_R	AGCTTTGTTTAAACCACAATGAGTAATCAAACATC	Human	Luciferase assay
Human TRA2B-CDS F	CCGGAATTCATGAGCGACAGCGGCGAGCA	Human	Overexpression Vector
Human TRA2B-CDS R	CGCGGATCCATAGCGACGAGGTGAGTATG	Human	Overexpression Vector
Human TRA2B_qPCR F	GACCAGCAGTCTAGGCGTTC	Human	qRT-PCR
Human TRA2B_qPCR R	CGAGAGCTGCCATAGGTAGG	Human	qRT-PCR
RRAS2_shRNA628 _ F	CCGGGTGATGAGTTTCCCATGATTTCTCGAGAAATCATGGGAAACTCATCACTTTTTG	Mouse	shRNA
RRAS2_shRNA628 _ R	AATTCAAAAAGTGATGAGTTTCCCATGATTTCTCGAGAAATCATGGGAAACTCATCAC	Mouse	shRNA
RRAS2_shRNA979 _ F	CCGGGACCGATGATCACCGTGTTAGCTCGAGCTAACACGGTGATCATCGGTCTTTTTG	Mouse	shRNA
RRAS2_shRNA979 _ R	AATTCAAAAAGACCGATGATCACCGTGTTAGCTCGAGCTAACACGGTGATCATCGGTC	Mouse	shRNA
MBNL1 sh2131_F	CCGGAGCCAACCAGATACCCATAATCTCGAGATTATGGGTATCTGGTTGGCTTTTTTG	Mouse	shRNA
MBNL1 sh2131_R	AATTCAAAAAAGCCAACCAGATACCCATAATCTCGAGATTATGGGTATCTGGTTGGCT	Mouse	shRNA
SRSF2 sh751_F	CCGGTCGAAGCGAGAGTCCAAGTCTCTCGAGAGACTTGGACTCTCGCTTCGATTTTTG	Mouse	shRNA
SRSF2 sh751_R	AATTCAAAAATCGAAGCGAGAGTCCAAGTCTCTCGAGAGACTTGGACTCTCGCTTCGA	Mouse	shRNA
TRA2B sh839_F	CCGGGTTATGATGACCGGGACTATTCTCGAGAATAGTCCCGGTCATCATAACTTTTTG	Mouse	shRNA
TRA2B sh839_R	AATTCAAAAAGTTATGATGACCGGGACTATTCTCGAGAATAGTCCCGGTCATCATAAC	Mouse	shRNA
ZCRB1 sh567_F	CCGGGAAGAAGAAATTGAGGAAGTACTCGAGTACTTCCTCAATTTCTTCTTCTTTTTG	Mouse	shRNA
ZCRB1 sh567_R	AATTCAAAAAGAAGAAGAAATTGAGGAAGTACTCGAGTACTTCCTCAATTTCTTCTTC	Mouse	shRNA
H_RRAS2_sh769_F	CCGGGCAAAGATTAGGATGAATGTACTCGAGTACATTCATCCTAATCTTTGCTTTTTG	Human	shRNA
H_RRAS2_sh769_R	AATTCAAAAAGCAAAGATTAGGATGAATGTACTCGAGTACATTCATCCTAATCTTTGC	Human	shRNA
H_RRAS2_sh646_F	CCGGCGTGATGAGTTCCCAATGATTCTCGAGAATCATTGGGAACTCATCACGTTTTTG	Human	shRNA
H_RRAS2_sh646_R	AATTCAAAAACGTGATGAGTTCCCAATGATTCTCGAGAATCATTGGGAACTCATCACG	Human	shRNA
TRA2B human sh1123 F	CCGGTACTCACCTCGTCGCTATTAACTCGAGTTAATAGCGACGAGGTGAGTATTTTTG	Human	shRNA
TRA2B human sh1123 R	AATTCAAAAATACTCACCTCGTCGCTATTAACTCGAGTTAATAGCGACGAGGTGAGTA	Human	shRNA
